# Supplementary material for: Chromosomal aberrations and early mortality in a non-mammalian vertebrate: example from triploid-induced Atlantic salmon
Source: Research Square preprint supplement (doi:10.21203/rs.3.rs-4180820/v1), 2024-04-09
Supplement: Supplementary file 1 [file Genotype_mismatches.xlsx]

## Sheet: Experiment 1_eggs
Offspring/parent ID	family	SSsp2201	SSsp2201	SSsp2201	SSsp2210	SSsp2210	SSsp2210	SsaD157	SsaD157	SsaD157	Sp1605	Sp1605	Sp1605	Sp2216	Sp2216	Sp2216	Ssa14	Ssa14	Ssa14	Ssa197	Ssa197	Ssa197	SsaF43	SsaF43	SsaF43	SsOsl85	SsOsl85	SsOsl85	EST107	EST107	EST107	EST19	EST19	EST19	EST28	EST28	EST28	EST68	EST68	EST68	Sleel53	Sleel53	Sleel53	Sleen82	Sleen82	Sleen82	SsOSL25	SsOSL25	SsOSL25
																																inherit two paternal alleles															inherit two paternal alleles
2022-PLATE-3_2022-102_1-0P_Fam1_R1_01	1	275	283	NA	148	152	NA	319	343	NA	224	249	NA	234	234	NA	140	144	NA	196	200	NA	103	115	NA	NA	NA	NA	359	365	NA	336	336	372	346	346	NA	191	191	NA	173	173	NA	220	222	NA	156	156	168
M13		267	283		124	152		319	343		224	224		234	242		140	144		196	208		103	115		187	197		359	365		336	372		346	360		191	197		173	175		222	222		156	168
M1		275	279		148	164		343	343		244	249		222	234		140	140		200	200		115	115		195	197		359	363		364	372		346	346		191	201		173	173		220	226		154	168
					inherit two paternal alleles
2022-PLATE-3_2022-102_22-0P_Fam2_R1_07	2	275	283	NA	148	152	152	327	343	NA	224	224	NA	NA	NA	NA	140	140	NA	196	200	NA	103	103	NA	187	193	NA	359	363	NA	336	344	NA	346	360	NA	197	201	NA	173	175	NA	222	222	NA	154	168	NA
M13		267	283		124	152		319	343		224	224		234	242		140	144		196	208		103	115		187	197		359	365		336	372		346	360		191	197		173	175		222	222		156	168
M2		275	275		148	164		327	343		224	224		206	238		140	140		188	200		103	115		187	193		363	365		344	372		352	360		197	201		173	175		220	222		154	154
																																															inherit two paternal alleles
2022-PLATE-3_2022-102_25-0P_Fam2_R1_10	2	275	283	NA	124	148	NA	319	343	NA	224	224	NA	NA	NA	NA	140	144	NA	188	196	NA	115	115	NA	NA	NA	NA	365	365	NA	344	372	NA	NA	NA	NA	191	197	NA	NA	NA	NA	NA	NA	NA	154	168	168
M13		267	283		124	152		319	343		224	224		234	242		140	144		196	208		103	115		187	197		359	365		336	372		346	360		191	197		173	175		222	222		156	168
M2		275	275		148	164		327	343		224	224		206	238		140	140		188	200		103	115		187	193		363	365		344	372		352	360		197	201		173	175		220	222		154	154
																	inherit two paternal alleles
2022-PLATE-3_2022-102_37-0P_Fam3_R1_07	3	267	275	NA	NA	NA	NA	319	339	NA	224	244	NA	NA	NA	NA	140	144	144	NA	NA	NA	NA	NA	NA	NA	NA	NA	NA	NA	NA	352	372	NA	NA	NA	NA	191	197	NA	NA	NA	NA	220	222	NA	156	168	NA
M13		267	283		124	152		319	343		224	224		234	242		140	144		196	208		103	115		187	197		359	365		336	372		346	360		191	197		173	175		222	222		156	168
M3		275	275		148	164		315	339		244	244		238	246		140	140		192	224		115	115		193	195		359	359		344	352		346	352		197	201		173	173		220	220		156	156
		missing maternal allele , maybe base shift 4
2022-PLATE-3_2022-102_50-0P_Fam1_R2_05	1	267	283	NA	148	152	NA	319	343	NA	NA	NA	NA	234	234	NA	140	144	NA	196	200	NA	NA	NA	NA	NA	NA	NA	359	359	NA	NA	NA	NA	346	360	NA	191	201	NA	173	175	NA	222	226	NA	154	156	NA
M13		267	283		124	152		319	343		224	224		234	242		140	144		196	208		103	115		187	197		359	365		336	372		346	360		191	197		173	175		222	222		156	168
M1		275	279		148	164		343	343		244	249		222	234		140	140		200	200		115	115		195	197		359	363		364	372		346	346		191	201		173	173		220	226		154	168
																																															inherit two paternal alleles
2022-PLATE-3_2022-102_54-0P_Fam1_R2_09	1	275	283	NA	124	148	NA	319	343	NA	NA	NA	NA	222	234	NA	140	140	NA	196	200	NA	115	115	NA	NA	NA	NA	359	363	NA	372	372	NA	346	346	NA	191	197	NA	173	175	NA	220	222	NA	156	156	168
M13		267	283		124	152		319	343		224	224		234	242		140	144		196	208		103	115		187	197		359	365		336	372		346	360		191	197		173	175		222	222		156	168
M1		275	279		148	164		343	343		244	249		222	234		140	140		200	200		115	115		195	197		359	363		364	372		346	346		191	201		173	173		220	226		154	168
		allele 3 not in any parent , maybe base shift 4
2022-PLATE-3_2022-102_64-0P_Fam2_R2_04	2	267	275	279	124	164	NA	343	343	NA	NA	NA	NA	NA	NA	NA	NA	NA	NA	188	208	NA	103	115	NA	187	197	NA	365	365	NA	372	372	NA	346	352	NA	191	201	NA	NA	NA	NA	222	222	NA	154	156	NA
M13		267	283		124	152		319	343		224	224		234	242		140	144		196	208		103	115		187	197		359	365		336	372		346	360		191	197		173	175		222	222		156	168
M2		275	275		148	164		327	343		224	224		206	238		140	140		188	200		103	115		187	193		363	365		344	372		352	360		197	201		173	175		220	222		154	154
																																															inherit two paternal alleles
2022-PLATE-3_2022-102_72-0P_Fam2_R2_12	2	275	283	NA	124	164	NA	NA	NA	NA	NA	NA	NA	NA	NA	NA	NA	NA	NA	188	208	NA	103	115	NA	187	187	NA	365	365	NA	336	344	NA	NA	NA	NA	191	201	NA	NA	NA	NA	222	222	NA	154	168	168
M13		267	283		124	152		319	343		224	224		234	242		140	144		196	208		103	115		187	197		359	365		336	372		346	360		191	197		173	175		222	222		156	168
M2		275	275		148	164		327	343		224	224		206	238		140	140		188	200		103	115		187	193		363	365		344	372		352	360		197	201		173	175		220	222		154	154
																				inherit two paternal alleles
2022-PLATE-3_2022-102_75-0P_Fam2_R2_15	2	275	283	NA	148	152	NA	343	343	NA	224	224	NA	206	242	NA	NA	NA	NA	188	208	208	NA	NA	NA	NA	NA	NA	359	363	NA	372	372	NA	352	360	NA	191	201	NA	173	173	NA	220	222	NA	NA	NA	NA
M13		267	283		124	152		319	343		224	224		234	242		140	144		196	208		103	115		187	197		359	365		336	372		346	360		191	197		173	175		222	222		156	168
M2		275	275		148	164		327	343		224	224		206	238		140	140		188	200		103	115		187	193		363	365		344	372		352	360		197	201		173	175		220	222		154	154
																																															inherit two paternal alleles
2022-PLATE-3_2022-102_76-0P_Fam3_R2_01	3	275	283	NA	NA	NA	NA	319	339	NA	NA	NA	NA	NA	NA	NA	140	140	NA	192	208	NA	103	115	NA	187	193	NA	359	365	NA	336	344	NA	NA	NA	NA	197	201	NA	NA	NA	NA	220	222	NA	156	168	168
M13		267	283		124	152		319	343		224	224		234	242		140	144		196	208		103	115		187	197		359	365		336	372		346	360		191	197		173	175		222	222		156	168
M3		275	275		148	164		315	339		244	244		238	246		140	140		192	224		115	115		193	195		359	359		344	352		346	352		197	201		173	173		220	220		156	156
																																inherit two paternal alleles
2022-PLATE-3_2022-102_94-P1_Fam1_R1_04	1	267	279	NA	152	164	NA	319	343	NA	NA	NA	NA	234	242	NA	NA	NA	NA	200	208	NA	103	115	NA	187	197	NA	359	363	NA	336	336	372	346	360	NA	191	197	NA	173	173	NA	222	226	NA	NA	NA	NA
M13		267	283		124	152		319	343		224	224		234	242		140	144		196	208		103	115		187	197		359	365		336	372		346	360		191	197		173	175		222	222		156	168
M1		275	279		148	164		343	343		244	249		222	234		140	140		200	200		115	115		195	197		359	363		364	372		346	346		191	201		173	173		220	226		154	168
																										missing maternal allele , maybe base shift -6			missing maternal allele , maybe base shift 6			missing maternal allele
2022-PLATE-9_2022-102_126-P1_Fam3_R1_06	3	267	275	NA	124	148	NA	315	319	NA	224	244	NA	234	238	NA	140	140	NA	208	224	NA	115	115	NA	187	187	NA	365	365	NA	336	336	NA	352	360	NA	197	201	NA	173	173	NA	220	222	NA	156	156	NA
M13		267	283		124	152		319	343		224	224		234	242		140	144		196	208		103	115		187	197		359	365		336	372		346	360		191	197		173	175		222	222		156	168
M3		275	275		148	164		315	339		244	244		238	246		140	140		192	224		115	115		193	195		359	359		344	352		346	352		197	201		173	173		220	220		156	156
								allele 1 not in any parent , maybe base shift -4
2022-PLATE-9_2022-102_138-P1_Fam1_R2_03	1	267	279	NA	148	152	NA	339	343	NA	224	249	NA	222	242	NA	140	140	NA	196	200	NA	103	115	NA	187	195	NA	359	359	NA	336	372	NA	346	346	NA	191	197	NA	173	173	NA	222	226	NA	156	168	NA
M13		267	283		124	152		319	343		224	224		234	242		140	144		196	208		103	115		187	197		359	365		336	372		346	360		191	197		173	175		222	222		156	168
M1		275	279		148	164		343	343		244	249		222	234		140	140		200	200		115	115		195	197		359	363		364	372		346	346		191	201		173	173		220	226		154	168
		inherit two paternal alleles
2022-PLATE-9_2022-102_145-P1_Fam1_R2_10	1	275	283	283	148	152	NA	343	343	NA	224	244	NA	NA	NA	NA	140	144	NA	196	200	NA	115	115	NA	NA	NA	NA	359	359	NA	336	364	NA	346	346	NA	191	201	NA	NA	NA	NA	220	222	222	156	168	NA
M13		267	283		124	152		319	343		224	224		234	242		140	144		196	208		103	115		187	197		359	365		336	372		346	360		191	197		173	175		222	222		156	168
M1		275	279		148	164		343	343		244	249		222	234		140	140		200	200		115	115		195	197		359	363		364	372		346	346		191	201		173	173		220	226		154	168
																													missing maternal allele , maybe base shift -4			missing maternal allele
2022-PLATE-9_2022-102_163-P1_Fam2_R2_13	2	267	275	NA	124	164	NA	343	343	NA	224	224	NA	206	242	NA	140	140	NA	188	208	NA	115	115	NA	187	187	NA	359	359	NA	336	336	NA	346	360	NA	197	197	NA	175	175	NA	220	222	222	154	168	NA
M13		267	283		124	152		319	343		224	224		234	242		140	144		196	208		103	115		187	197		359	365		336	372		346	360		191	197		173	175		222	222		156	168
M2		275	275		148	164		327	343		224	224		206	238		140	140		188	200		103	115		187	193		363	365		344	372		352	360		197	201		173	175		220	222		154	154
																																															inherit two paternal alleles
2022-PLATE-9_2022-102_164-P1_Fam2_R2_14	2	267	275	NA	NA	NA	NA	319	343	NA	224	224	NA	NA	NA	NA	140	144	NA	188	208	NA	103	115	NA	193	193	197	363	363	365	344	372	372	346	360	NA	191	197	NA	173	173	NA	220	222	NA	154	156	156
M13		267	283		124	152		319	343		224	224		234	242		140	144		196	208		103	115		187	197		359	365		336	372		346	360		191	197		173	175		222	222		156	168
M2		275	275		148	164		327	343		224	224		206	238		140	140		188	200		103	115		187	193		363	365		344	372		352	360		197	201		173	175		220	222		154	154
																				inherit two paternal alleles
2022-PLATE-9_2022-102_165-P1_Fam2_R2_15	2	267	275	NA	152	164	NA	NA	NA	NA	224	224	NA	NA	NA	NA	140	144	NA	188	196	196	103	115	115	187	193	NA	359	363	NA	336	344	NA	NA	NA	NA	191	197	NA	173	175	NA	222	222	NA	154	156	NA
M13		267	283		124	152		319	343		224	224		234	242		140	144		196	208		103	115		187	197		359	365		336	372		346	360		191	197		173	175		222	222		156	168
M2		275	275		148	164		327	343		224	224		206	238		140	140		188	200		103	115		187	193		363	365		344	372		352	360		197	201		173	175		220	222		154	154
											missing maternal allele
2022-PLATE-9_2022-102_186-P2_Fam1_R1_06	1	279	283	NA	148	152	NA	343	343	NA	224	224	NA	222	234	NA	140	140	NA	196	200	NA	115	115	NA	187	197	NA	363	365	NA	336	372	NA	346	346	NA	197	201	NA	173	173	NA	220	222	NA	168	168	NA
M13		267	283		124	152		319	343		224	224		234	242		140	144		196	208		103	115		187	197		359	365		336	372		346	360		191	197		173	175		222	222		156	168
M1		275	279		148	164		343	343		244	249		222	234		140	140		200	200		115	115		195	197		359	363		364	372		346	346		191	201		173	173		220	226		154	168
											missing maternal allele
2022-PLATE-10_2022-102_190-P2_Fam1_R1_10	1	275	283	NA	148	152	NA	343	343	NA	224	224	NA	234	234	NA	140	144	NA	200	200	208	103	115	NA	197	197	NA	363	365	NA	364	372	NA	346	360	NA	191	201	NA	173	173	NA	220	222	NA	154	168	168
M13		267	283		124	152		319	343		224	224		234	242		140	144		196	208		103	115		187	197		359	365		336	372		346	360		191	197		173	175		222	222		156	168
M1		275	279		148	164		343	343		244	249		222	234		140	140		200	200		115	115		195	197		359	363		364	372		346	346		191	201		173	173		220	226		154	168
		missing maternal allele , maybe base shift 4
		allele 2 not in any parent , maybe base shift 4
		allele 3 not in any parent , maybe base shift 4
2022-PLATE-10_2022-102_204-P2_Fam2_R1_09	2	267	279	279	152	164	NA	319	327	343	NA	NA	NA	206	238	242	140	140	NA	188	200	208	103	115	NA	193	197	NA	365	365	NA	344	372	NA	360	360	NA	197	197	201	173	175	NA	220	222	222	154	154	156
M13		267	283		124	152		319	343		224	224		234	242		140	144		196	208		103	115		187	197		359	365		336	372		346	360		191	197		173	175		222	222		156	168
M2		275	275		148	164		327	343		224	224		206	238		140	140		188	200		103	115		187	193		363	365		344	372		352	360		197	201		173	175		220	222		154	154
																							allele 3 not in any parent , maybe base shift 2
2022-PLATE-10_2022-102_234-P2_Fam1_R2_09	1	275	279	283	124	148	164	343	343	NA	224	244	249	NA	NA	NA	140	140	144	NA	NA	NA	103	115	117	NA	NA	NA	359	359	NA	336	364	372	346	346	NA	191	191	201	173	173	175	220	222	226	154	168	168
M13		267	283		124	152		319	343		224	224		234	242		140	144		196	208		103	115		187	197		359	365		336	372		346	360		191	197		173	175		222	222		156	168
M1		275	279		148	164		343	343		244	249		222	234		140	140		200	200		115	115		195	197		359	363		364	372		346	346		191	201		173	173		220	226		154	168
2022-PLATE-10_2022-102_253-P2_Fam2_R2_13	2	275	275	283	124	148	164	327	343	343	224	224	NA	NA	NA	NA	140	140	144	NA	NA	NA	103	103	115	187	193	197	363	363	365	344	372	372	352	360	360	191	197	201	173	173	175	220	222	222	154	156	NA
M13		267	283		124	152		319	343		224	224		234	242		140	144		196	208		103	115		187	197		359	365		336	372		346	360		191	197		173	175		222	222		156	168
M2		275	275		148	164		327	343		224	224		206	238		140	140		188	200		103	115		187	193		363	365		344	372		352	360		197	201		173	175		220	222		154	154
																																allele 1 not in any parent
2022-PLATE-11_2022-102_284-P3_Fam1_R1_14	1	275	275	283	124	148	164	343	343	NA	NA	NA	NA	222	234	242	140	140	NA	200	200	208	103	115	115	197	197	NA	363	363	365	356	364	372	346	346	NA	191	197	201	173	173	NA	220	222	226	168	168	NA
M13		267	283		124	152		319	343		224	224		234	242		140	144		196	208		103	115		187	197		359	365		336	372		346	360		191	197		173	175		222	222		156	168
M1		275	279		148	164		343	343		244	249		222	234		140	140		200	200		115	115		195	197		359	363		364	372		346	346		191	201		173	173		220	226		154	168
		missing paternal allele , maybe base shift 4
		allele 1 not in any parent , maybe base shift 4
2022-PLATE-11_2022-102_302-P3_Fam3_R1_02	3	271	275	275	148	152	164	315	339	343	224	244	244	NA	NA	NA	140	140	144	192	208	224	115	115	NA	193	195	197	359	359	365	344	352	372	346	352	360	191	197	201	173	173	175	220	220	222	156	156	NA
M13		267	283		124	152		319	343		224	224		234	242		140	144		196	208		103	115		187	197		359	365		336	372		346	360		191	197		173	175		222	222		156	168
M3		275	275		148	164		315	339		244	244		238	246		140	140		192	224		115	115		193	195		359	359		344	352		346	352		197	201		173	173		220	220		156	156
														missing maternal allele
2022-PLATE-11_2022-102_317-P3_Fam1_R2_02	1	267	275	NA	124	148	NA	319	343	343	224	244	249	242	242	NA	140	144	NA	196	200	200	115	115	NA	195	197	197	359	363	365	364	372	372	346	346	NA	191	201	NA	173	173	175	220	222	226	154	168	168
M13		267	283		124	152		319	343		224	224		234	242		140	144		196	208		103	115		187	197		359	365		336	372		346	360		191	197		173	175		222	222		156	168
M1		275	279		148	164		343	343		244	249		222	234		140	140		200	200		115	115		195	197		359	363		364	372		346	346		191	201		173	173		220	226		154	168
		missing maternal allele			missing maternal allele , maybe base shift 4						missing maternal allele									missing maternal allele			missing maternal allele						missing maternal allele , maybe base shift 6									missing maternal allele , maybe base shift 6			missing maternal allele , maybe base shift 2			missing maternal allele , maybe base shift 2
2022-PLATE-11_2022-102_320-P3_Fam1_R2_05	1	267	267	NA	152	152	NA	343	343	NA	224	224	NA	234	234	NA	140	140	NA	208	208	NA	103	103	NA	197	197	NA	365	365	NA	372	372	NA	346	346	NA	197	197	NA	175	175	NA	222	222	NA	168	168	NA
M13		267	283		124	152		319	343		224	224		234	242		140	144		196	208		103	115		187	197		359	365		336	372		346	360		191	197		173	175		222	222		156	168
M1		275	279		148	164		343	343		244	249		222	234		140	140		200	200		115	115		195	197		359	363		364	372		346	346		191	201		173	173		220	226		154	168
		missing maternal allele						missing maternal allele						missing maternal allele , maybe base shift 4						missing maternal allele									missing maternal allele , maybe base shift -4			missing maternal allele															missing maternal allele , maybe base shift 2
2022-PLATE-11_2022-102_330-P3_Fam1_R2_15	1	267	267	NA	124	148	NA	319	319	NA	224	224	NA	242	242	NA	140	140	NA	208	208	NA	115	115	NA	187	187	NA	359	359	NA	336	336	NA	360	360	NA	197	197	NA	175	175	NA	222	222	NA	156	156	NA
M13		267	283		124	152		319	343		224	224		234	242		140	144		196	208		103	115		187	197		359	365		336	372		346	360		191	197		173	175		222	222		156	168
M2		275	275		148	164		327	343		224	224		206	238		140	140		188	200		103	115		187	193		363	365		344	372		352	360		197	201		173	175		220	222		154	154
											allele 1 not in any parent			missing maternal allele , maybe base shift -4
2022-PLATE-11_2022-102_334-P3_Fam2_R2_04	2	267	275	275	124	148	164	319	343	NA	216	224	NA	234	234	NA	NA	NA	NA	188	200	208	103	115	NA	187	187	NA	359	365	NA	336	344	NA	346	360	NA	197	201	NA	175	175	NA	220	222	NA	154	154	168
M13		267	283		124	152		319	343		224	224		234	242		140	144		196	208		103	115		187	197		359	365		336	372		346	360		191	197		173	175		222	222		156	168
M2		275	275		148	164		327	343		224	224		206	238		140	140		188	200		103	115		187	193		363	365		344	372		352	360		197	201		173	175		220	222		154	154
		allele 3 not in any parent , maybe base shift 4
2022-PLATE-12_2022-102_387-9500P_Fam2_R1_12	2	267	275	279	148	152	164	327	343	343	NA	NA	NA	206	238	242	140	140	144	188	208	NA	103	115	115	187	193	197	363	365	365	344	372	372	346	360	360	191	197	201	175	175	NA	220	222	222	154	154	168
M13		267	283		124	152		319	343		224	224		234	242		140	144		196	208		103	115		187	197		359	365		336	372		346	360		191	197		173	175		222	222		156	168
M2		275	275		148	164		327	343		224	224		206	238		140	140		188	200		103	115		187	193		363	365		344	372		352	360		197	201		173	175		220	222		154	154
								allele 1 not in any parent
2022-PLATE-12_2022-102_409-9500P_Fam1_R2_04	1	267	275	279	124	148	164	335	343	343	224	244	249	222	234	242	140	140	144	200	200	208	103	115	115	187	195	197	359	359	363	336	364	372	346	346	NA	191	191	201	173	173	175	220	222	226	154	168	168
M13		267	283		124	152		319	343		224	224		234	242		140	144		196	208		103	115		187	197		359	365		336	372		346	360		191	197		173	175		222	222		156	168
M1		275	279		148	164		343	343		244	249		222	234		140	140		200	200		115	115		195	197		359	363		364	372		346	346		191	201		173	173		220	226		154	168
[truncated: 12 more columns]

## Sheet: Experiment 1_parr
Offspring/parent ID	family	SSsp2201	SSsp2201	SSsp2201	SSsp2210	SSsp2210	SSsp2210	SsaD157	SsaD157	SsaD157	Sp1605	Sp1605	Sp1605	Sp2216	Sp2216	Sp2216	Ssa14	Ssa14	Ssa14	Ssa197	Ssa197	Ssa197	SsaF43	SsaF43	SsaF43	SsOsl85	SsOsl85	SsOsl85	EST107	EST107	EST107	EST19	EST19	EST19	EST28	EST28	EST28	EST68	EST68	EST68	Sleel53	Sleel53	Sleel53	Sleen82	Sleen82	Sleen82	SsOSL25	SsOSL25	SsOSL25
								missing paternal allele , maybe base shift 4
								allele 1 not in any parent , maybe base shift 4
2023-PLATE-48_2022-2345_150-Pressure_0PSI_R2_025	3	275	283	NA	152	164	NA	323	339	NA	224	244	NA	242	246	NA	140	140	NA	196	224	NA	103	115	NA	187	193	NA	359	359	NA	336	352	NA	346	346	NA	197	197	NA	173	175	NA	220	222	NA	156	156	NA
M13		267	283		124	152		319	343		224	224		234	242		140	144		196	208		103	115		187	197		359	365		336	372		346	360		191	197		173	175		222	222		156	168
M3		275	275		148	164		315	339		244	244		238	246		140	140		192	224		115	115		193	195		359	359		344	352		346	352		197	201		173	173		220	220		156	156
																																missing maternal allele , maybe base shift 4
																																allele 2 not in any parent , maybe base shift 4
2023-PLATE-48_2022-2345_78-Pressure_0PSI_R1_078	1	267	275	NA	124	164	NA	343	343	NA	224	249	NA	234	242	NA	140	140	NA	200	208	NA	115	115	NA	187	197	NA	363	365	NA	336	368	NA	346	360	NA	191	197	NA	173	175	NA	222	226	NA	156	168	NA
M13		267	283		124	152		319	343		224	224		234	242		140	144		196	208		103	115		187	197		359	365		336	372		346	360		191	197		173	175		222	222		156	168
M1		275	279		148	164		343	343		244	249		222	234		140	140		200	200		115	115		195	197		359	363		364	372		346	346		191	201		173	173		220	226		154	168
																				missing maternal allele , maybe base shift 4
																				allele 2 not in any parent , maybe base shift 4
2023-PLATE-48_2022-2345_90-Pressure_0PSI_R1_090	3	275	283	NA	152	164	NA	339	343	NA	224	244	NA	234	238	NA	140	140	NA	208	228	NA	103	115	NA	195	197	NA	359	365	NA	352	372	NA	352	360	NA	197	197	NA	173	175	NA	220	222	NA	156	156	NA
M13		267	283		124	152		319	343		224	224		234	242		140	144		196	208		103	115		187	197		359	365		336	372		346	360		191	197		173	175		222	222		156	168
M3		275	275		148	164		315	339		244	244		238	246		140	140		192	224		115	115		193	195		359	359		344	352		346	352		197	201		173	173		220	220		156	156
2023-PLATE-49_2022-2345_170-Pressure_0PSI_R2_045	3	275	283	NA	152	164	NA	315	343	NA	224	244	NA	242	246	NA	140	140	NA	208	224	NA	103	115	NA	195	197	NA	359	365	NA	352	372	NA	352	360	NA	197	201	NA	173	175	NA	220	222	NA	156	156	NA
M13		267	283		124	152		319	343		224	224		234	242		140	144		196	208		103	115		187	197		359	365		336	372		346	360		191	197		173	175		222	222		156	168
M3		275	275		148	164		315	339		244	244		238	246		140	140		192	224		115	115		193	195		359	359		344	352		346	352		197	201		173	173		220	220		156	156
								missing paternal allele , maybe base shift 4
								allele 1 not in any parent , maybe base shift 4
2023-PLATE-49_2022-2345_180-Pressure_0PSI_R2_055	2	275	283	NA	152	164	NA	323	327	NA	NA	NA	NA	206	242	NA	140	140	NA	200	208	NA	103	115	NA	187	193	NA	365	365	NA	336	344	NA	346	360	NA	197	201	NA	173	173	NA	220	222	NA	154	156	NA
M13		267	283		124	152		319	343		224	224		234	242		140	144		196	208		103	115		187	197		359	365		336	372		346	360		191	197		173	175		222	222		156	168
M2		275	275		148	164		327	343		224	224		206	238		140	140		188	200		103	115		187	193		363	365		344	372		352	360		197	201		173	175		220	222		154	154
		missing maternal allele , maybe base shift 4
		allele 1 not in any parent , maybe base shift 4
2023-PLATE-104_2022-2345_250-Pressure_0PSI_R2_125	2	279	283	NA	152	164	NA	319	327	NA	224	224	NA	234	238	NA	140	140	NA	200	208	NA	103	115	NA	193	197	NA	363	365	NA	NA	NA	NA	352	360	NA	197	201	NA	173	175	NA	222	222	NA	154	168	NA
M13		267	283		124	152		319	343		224	224		234	242		140	144		196	208		103	115		187	197		359	365		336	372		346	360		191	197		173	175		222	222		156	168
M2		275	275		148	164		327	343		224	224		206	238		140	140		188	200		103	115		187	193		363	365		344	372		352	360		197	201		173	175		220	222		154	154
																																												missing maternal allele , maybe base shift 2
2023-PLATE-104_2023-435_10-Pressure_6500PSI_R1_015	1	267	279	NA	152	164	NA	319	343	NA	224	244	NA	234	234	NA	140	144	NA	196	200	NA	103	115	NA	187	195	NA	359	365	NA	336	372	NA	346	346	NA	191	201	NA	173	173	NA	222	222	NA	168	168	NA
M13		267	283		124	152		319	343		224	224		234	242		140	144		196	208		103	115		187	197		359	365		336	372		346	360		191	197		173	175		222	222		156	168
M1		275	279		148	164		343	343		244	249		222	234		140	140		200	200		115	115		195	197		359	363		364	372		346	346		191	201		173	173		220	226		154	168
								inherit two paternal alleles
2023-PLATE-104_2023-435_75-Pressure_6500PSI_R1_100	1	267	279	NA	152	164	NA	319	319	343	224	244	NA	222	242	NA	140	140	NA	196	200	NA	103	115	NA	195	197	NA	359	359	NA	372	372	NA	346	346	NA	197	201	NA	173	173	NA	222	226	NA	156	168	NA
M13		267	283		124	152		319	343		224	224		234	242		140	144		196	208		103	115		187	197		359	365		336	372		346	360		191	197		173	175		222	222		156	168
M1		275	279		148	164		343	343		244	249		222	234		140	140		200	200		115	115		195	197		359	363		364	372		346	346		191	201		173	173		220	226		154	168
																				missing paternal allele , maybe base shift 4
																				allele 2 not in any parent , maybe base shift 4
2023-PLATE-105_2023-435_130-Pressure_6500PSI_R2_033	3	275	283	NA	152	164	NA	339	343	NA	224	244	NA	234	238	246	140	140	NA	192	200	NA	115	115	NA	195	197	NA	359	365	NA	352	372	NA	346	346	NA	197	201	NA	173	175	NA	220	222	NA	156	168	NA
M13		267	283		124	152		319	343		224	224		234	242		140	144		196	208		103	115		187	197		359	365		336	372		346	360		191	197		173	175		222	222		156	168
M3		275	275		148	164		315	339		244	244		238	246		140	140		192	224		115	115		193	195		359	359		344	352		346	352		197	201		173	173		220	220		156	156
								allele 1 not in any parent , maybe base shift -4												missing maternal allele
																				allele 1 not in any parent
2023-PLATE-105_2023-435_147-Pressure_6500PSI_R2_053	1	267	275	NA	124	164	NA	339	343	343	NA	NA	NA	NA	NA	NA	140	144	NA	192	208	NA	103	115	NA	195	197	NA	359	365	NA	NA	NA	NA	346	346	NA	191	201	NA	NA	NA	NA	220	222	NA	156	168	168
M13		267	283		124	152		319	343		224	224		234	242		140	144		196	208		103	115		187	197		359	365		336	372		346	360		191	197		173	175		222	222		156	168
M1		275	279		148	164		343	343		244	249		222	234		140	140		200	200		115	115		195	197		359	363		364	372		346	346		191	201		173	173		220	226		154	168
		missing maternal allele , maybe base shift 4
		allele 1 not in any parent , maybe base shift 4
2023-PLATE-105_2023-435_152-Pressure_6500PSI_R2_061	2	279	283	NA	148	152	NA	319	327	NA	224	224	NA	206	234	NA	140	144	NA	200	208	NA	103	115	NA	187	193	NA	359	363	NA	336	372	NA	352	360	NA	191	201	NA	173	173	NA	220	222	NA	154	156	NA
M13		267	283		124	152		319	343		224	224		234	242		140	144		196	208		103	115		187	197		359	365		336	372		346	360		191	197		173	175		222	222		156	168
M2		275	275		148	164		327	343		224	224		206	238		140	140		188	200		103	115		187	193		363	365		344	372		352	360		197	201		173	175		220	222		154	154
											missing maternal allele , maybe base shift 4
											allele 2 not in any parent , maybe base shift 4
2023-PLATE-105_2023-435_168-Pressure_6500PSI_R2_082	1	267	275	NA	124	164	NA	343	343	NA	224	253	NA	222	234	NA	140	140	NA	196	200	NA	103	115	NA	187	197	NA	359	363	NA	336	372	NA	346	346	NA	197	201	NA	173	173	NA	222	226	NA	154	168	NA
M13		267	283		124	152		319	343		224	224		234	242		140	144		196	208		103	115		187	197		359	365		336	372		346	360		191	197		173	175		222	222		156	168
M1		275	279		148	164		343	343		244	249		222	234		140	140		200	200		115	115		195	197		359	363		364	372		346	346		191	201		173	173		220	226		154	168
																																missing paternal allele , maybe base shift -4
																																allele 1 not in any parent , maybe base shift -4
2023-PLATE-105_2023-435_172-Pressure_6500PSI_R2_087	3	267	275	275	148	152	164	315	339	343	224	244	244	234	238	246	140	140	NA	192	196	224	115	115	NA	187	193	195	359	359	NA	332	344	352	346	352	360	197	197	NA	173	173	NA	220	220	222	156	156	168
M13		267	283		124	152		319	343		224	224		234	242		140	144		196	208		103	115		187	197		359	365		336	372		346	360		191	197		173	175		222	222		156	168
M3		275	275		148	164		315	339		244	244		238	246		140	140		192	224		115	115		193	195		359	359		344	352		346	352		197	201		173	173		220	220		156	156
																				allele 1 not in any parent
2023-PLATE-106_2022-2353_11-Pressure_7500PSI_R1_011	3	267	275	275	148	152	164	315	319	339	224	244	244	234	238	246	140	140	144	184	196	224	115	115	NA	195	195	197	359	359	NA	344	352	372	346	346	352	191	197	201	173	173	175	220	220	222	156	156	NA
M13		267	283		124	152		319	343		224	224		234	242		140	144		196	208		103	115		187	197		359	365		336	372		346	360		191	197		173	175		222	222		156	168
M3		275	275		148	164		315	339		244	244		238	246		140	140		192	224		115	115		193	195		359	359		344	352		346	352		197	201		173	173		220	220		156	156
																																												missing paternal allele , maybe base shift -2
2023-PLATE-106_2022-2353_12-Pressure_7500PSI_R1_012	3	275	275	283	148	152	164	315	319	339	224	244	244	238	242	246	140	140	NA	192	196	224	103	115	115	187	193	195	359	359	NA	336	344	352	346	352	360	197	197	201	173	173	NA	220	220	NA	156	156	168
M13		267	283		124	152		319	343		224	224		234	242		140	144		196	208		103	115		187	197		359	365		336	372		346	360		191	197		173	175		222	222		156	168
M3		275	275		148	164		315	339		244	244		238	246		140	140		192	224		115	115		193	195		359	359		344	352		346	352		197	201		173	173		220	220		156	156
		missing paternal allele , maybe base shift -4
		allele 3 not in any parent , maybe base shift -4
2023-PLATE-109_2022-2353_176-Pressure_7500PSI_R2_076	3	275	275	279	148	152	164	315	319	339	224	244	244	238	242	246	140	140	NA	192	196	224	115	115	NA	195	195	197	359	359	NA	344	352	372	346	346	352	197	197	201	173	173	175	220	220	222	156	156	168
M13		267	283		124	152		319	343		224	224		234	242		140	144		196	208		103	115		187	197		359	365		336	372		346	360		191	197		173	175		222	222		156	168
M3		275	275		148	164		315	339		244	244		238	246		140	140		192	224		115	115		193	195		359	359		344	352		346	352		197	201		173	173		220	220		156	156
		missing paternal allele , maybe base shift 4
		allele 3 not in any parent , maybe base shift 4
2023-PLATE-109_2022-2354_40-Pressure_8500PSI_R1_040	1	275	275	287	124	148	164	319	343	343	224	244	249	222	234	242	140	140	144	200	200	208	115	115	NA	187	195	197	359	359	363	336	364	372	346	346	NA	191	191	201	173	173	NA	220	222	226	154	156	168
M13		267	283		124	152		319	343		224	224		234	242		140	144		196	208		103	115		187	197		359	365		336	372		346	360		191	197		173	175		222	222		156	168
M1		275	279		148	164		343	343		244	249		222	234		140	140		200	200		115	115		195	197		359	363		364	372		346	346		191	201		173	173		220	226		154	168
								allele 1 not in any parent , maybe base shift 4
2023-PLATE-110_2022-2354_117-Pressure_8500PSI_R2_017	2	275	275	283	NA	NA	NA	323	327	343	224	224	NA	NA	NA	NA	140	140	NA	196	200	200	103	103	115	187	193	193	363	363	365	336	344	344	352	352	360	197	197	201	173	173	175	220	222	222	154	154	156
M13		267	283		124	152		319	343		224	224		234	242		140	144		196	208		103	115		187	197		359	365		336	372		346	360		191	197		173	175		222	222		156	168
M2		275	275		148	164		327	343		224	224		206	238		140	140		188	200		103	115		187	193		363	365		344	372		352	360		197	201		173	175		220	222		154	154
																																missing paternal allele , maybe base shift 4
																																allele 3 not in any parent , maybe base shift 4
2023-PLATE-110_2022-2354_83-Pressure_8500PSI_R1_083	3	267	275	275	NA	NA	NA	315	319	339	224	244	244	NA	NA	NA	140	140	144	192	208	224	115	115	NA	193	193	197	359	359	365	344	352	376	346	352	360	191	197	201	173	173	175	220	220	222	156	156	NA
M13		267	283		124	152		319	343		224	224		234	242		140	144		196	208		103	115		187	197		359	365		336	372		346	360		191	197		173	175		222	222		156	168
M3		275	275		148	164		315	339		244	244		238	246		140	140		192	224		115	115		193	195		359	359		344	352		346	352		197	201		173	173		220	220		156	156
		missing maternal allele , maybe base shift 4
		allele 2 not in any parent , maybe base shift 4
		allele 3 not in any parent , maybe base shift 4
2023-PLATE-110_2022-2354_84-Pressure_8500PSI_R1_084	2	267	279	279	NA	NA	NA	343	343	NA	224	224	NA	NA	NA	NA	140	140	NA	188	200	208	115	115	NA	187	193	197	363	365	365	344	372	372	352	360	360	197	197	201	173	175	175	220	220	222	154	154	156
M13		267	283		124	152		319	343		224	224		234	242		140	144		196	208		103	115		187	197		359	365		336	372		346	360		191	197		173	175		222	222		156	168
M2		275	275		148	164		327	343		224	224		206	238		140	140		188	200		103	115		187	193		363	365		344	372		352	360		197	201		173	175		220	222		154	154
								allele 3 not in any parent , maybe base shift 4
2023-PLATE-112_2022-2354_164-Pressure_8500PSI_R2_064	2	267	275	275	148	152	164	343	343	347	NA	NA	NA	206	238	242	140	140	144	188	196	200	103	103	115	187	187	193	359	363	365	336	344	372	346	352	360	191	197	201	175	175	NA	220	222	222	154	154	156
M13		267	283		124	152		319	343		224	224		234	242		140	144		196	208		103	115		187	197		359	365		336	372		346	360		191	197		173	175		222	222		156	168
M2		275	275		148	164		327	343		224	224		206	238		140	140		188	200		103	115		187	193		363	365		344	372		352	360		197	201		173	175		220	222		154	154
								allele 2 not in any parent
2023-PLATE-112_2022-2354_180-Pressure_8500PSI_R2_080	2	275	275	283	148	152	164	327	335	343	NA	NA	NA	234	238	238	140	140	NA	188	200	208	103	103	NA	187	193	197	359	363	365	344	372	372	352	360	360	197	197	201	173	173	175	222	222	NA	154	154	156
M13		267	283		124	152		319	343		224	224		234	242		140	144		196	208		103	115		187	197		359	365		336	372		346	360		191	197		173	175		222	222		156	168
M2		275	275		148	164		327	343		224	224		206	238		140	140		188	200		103	115		187	193		363	365		344	372		352	360		197	201		173	175		220	222		154	154
		allele 2 not in any parent , maybe base shift 4
2023-PLATE-113_2022-2355_52-Pressure_9500PSI_R1_052	2	275	279	283	124	148	164	327	343	343	NA	NA	NA	206	234	238	140	140	144	188	200	208	103	115	115	187	193	197	365	365	NA	344	372	372	352	360	360	191	197	201	175	175	NA	220	222	222	154	154	156
M13		267	283		124	152		319	343		224	224		234	242		140	144		196	208		103	115		187	197		359	365		336	372		346	360		191	197		173	175		222	222		156	168
M2		275	275		148	164		327	343		224	224		206	238		140	140		188	200		103	115		187	193		363	365		344	372		352	360		197	201		173	175		220	222		154	154
																																												missing paternal allele , maybe base shift -2
2023-PLATE-113_2022-2355_88-Pressure_9500PSI_R1_088	1	267	279	279	124	148	148	319	343	343	224	244	249	222	234	242	140	140	144	196	200	200	103	115	115	187	195	197	359	359	363	336	364	372	346	346	360	191	191	201	173	173	175	220	220	NA	154	168	168
M13		267	283		124	152		319	343		224	224		234	242		140	144		196	208		103	115		187	197		359	365		336	372		346	360		191	197		173	175		222	222		156	168
M1		275	279		148	164		343	343		244	249		222	234		140	140		200	200		115	115		195	197		359	363		364	372		346	346		191	201		173	173		220	226		154	168
														allele 2 not in any parent , maybe base shift 4
2023-PLATE-114_2022-2355_170-Pressure_9500PSI_R2_045	1	279	279	283	148	152	164	343	343	NA	224	244	249	222	238	242	140	140	144	200	200	208	103	115	115	187	197	197	363	363	365	336	364	364	346	346	360	191	191	201	173	173	NA	220	222	226	156	168	168
M13		267	283		124	152		319	343		224	224		234	242		140	144		196	208		103	115		187	197		359	365		336	372		346	360		191	197		173	175		222	222		156	168
M1		275	279		148	164		343	343		244	249		222	234		140	140		200	200		115	115		195	197		359	363		364	372		346	346		191	201		173	173		220	226		154	168
		missing maternal allele , maybe base shift 4
		allele 1 not in any parent , maybe base shift 4
		allele 2 not in any parent , maybe base shift 4
2023-PLATE-114_2022-2355_178-Pressure_9500PSI_R2_053	2	279	279	283	124	148	164	327	343	343	NA	NA	NA	206	234	238	140	140	144	188	188	196	103	115	115	187	193	193	359	363	363	336	344	372	352	360	360	191	197	197	173	173	NA	220	222	222	154	154	156
M13		267	283		124	152		319	343		224	224		234	242		140	144		196	208		103	115		187	197		359	365		336	372		346	360		191	197		173	175		222	222		156	168
M2		275	275		148	164		327	343		224	224		206	238		140	140		188	200		103	115		187	193		363	365		344	372		352	360		197	201		173	175		220	222		154	154
		missing paternal allele , maybe base shift -4
		allele 1 not in any parent , maybe base shift -4
2023-PLATE-114_2022-2355_185-Pressure_9500PSI_R2_060	2	263	275	275	124	148	164	327	343	343	224	224	NA	206	234	238	140	140	144	188	200	208	103	115	115	187	193	197	363	365	365	344	372	372	346	352	360	191	197	201	173	173	NA	222	222	NA	154	154	156
M13		267	283		124	152		319	343		224	224		234	242		140	144		196	208		103	115		187	197		359	365		336	372		346	360		191	197		173	175		222	222		156	168
M2		275	275		148	164		327	343		224	224		206	238		140	140		188	200		103	115		187	193		363	365		344	372		352	360		197	201		173	175		220	222		154	154
								allele 1 not in any parent , maybe base shift -4
2023-PLATE-114_2022-2355_220-Pressure_9500PSI_R2_095	1	267	275	279	124	148	164	339	343	343	224	244	249	222	234	242	140	140	NA	196	200	200	103	115	115	187	195	197	359	363	365	336	364	364	346	346	360	191	197	201	173	173	175	222	226	226	154	156	168
M13		267	283		124	152		319	343		224	224		234	242		140	144		196	208		103	115		187	197		359	365		336	372		346	360		191	197		173	175		222	222		156	168
M1		275	279		148	164		343	343		244	249		222	234		140	140		200	200		115	115		195	197		359	363		364	372		346	346		191	201		173	173		220	226		154	168
														allele 3 not in any parent , maybe base shift 4
2023-PLATE-181_2022-2355_242-Pressure_9500PSI_R2_117	1	267	275	279	148	152	164	319	343	343	224	244	249	222	234	238	140	140	144	196	200	200	103	115	115	197	197	NA	363	363	365	364	372	372	346	346	360	191	201	201	173	173	NA	220	222	226	154	154	156
M13		267	283		124	152		319	343		224	224		234	242		140	144		196	208		103	115		187	197		359	365		336	372		346	360		191	197		173	175		222	222		156	168
M1		275	279		148	164		343	343		244	249		222	234		140	140		200	200		115	115		195	197		359	363		364	372		346	346		191	201		173	173		220	226		154	168
								allele 3 not in any parent , maybe base shift 4
2023-PLATE-181_2022-2355_247-Pressure_9500PSI_R2_122	2	267	275	275	124	148	164	327	343	347	NA	NA	NA	206	238	242	140	140	144	188	200	208	103	115	115	187	193	197	363	365	365	344	372	372	346	360	360	191	197	201	173	173	NA	222	222	NA	154	154	156
M13		267	283		124	152		319	343		224	224		234	242		140	144		196	208		103	115		187	197		359	365		336	372		346	360		191	197		173	175		222	222		156	168
M2		275	275		148	164		327	343		224	224		206	238		140	140		188	200		103	115		187	193		363	365		344	372		352	360		197	201		173	175		220	222		154	154
[truncated: 12 more columns]

## Sheet: Experiment 2_eggs
Offspring/parent ID	family	SSsp2210	SSsp2210	SSsp2210	SsaD157	SsaD157	SsaD157	Sp1605	Sp1605	Sp1605	Sp2216	Sp2216	Sp2216	Ssa14	Ssa14	Ssa14	Ssa197	Ssa197	Ssa197	SsaF43	SsaF43	SsaF43	SsOsl85	SsOsl85	SsOsl85	EST107	EST107	EST107	EST19	EST19	EST19	EST28	EST28	EST28	EST68	EST68	EST68	Sleel53	Sleel53	Sleel53	Sleen82	Sleen82	Sleen82	SsOSL25	SsOSL25	SsOSL25	SsSP2215	SsSP2215	SsSP2215
					inherit two paternal alleles
2022-PLATE-69_2022-137_25-2N_Fam2_05	2	NA	NA	NA	319	319	327	224	224	NA	NA	NA	NA	140	140	NA	200	208	NA	103	103	NA	187	187	NA	359	365	NA	336	372	NA	352	360	NA	197	197	NA	175	175	NA	222	222	NA	154	168	NA	113	117	NA
M13		124	152		319	343		224	224		234	242		140	144		196	208		103	115		187	197		359	365		336	372		346	360		191	197		173	175		222	222		156	168		109	113
M2		148	164		327	343		224	224		206	238		140	140		188	200		103	115		187	193		363	365		344	372		352	360		197	201		173	175		220	222		154	154		117	125
					missing paternal allele
2022-PLATE-69_2022-137_36-2N_Fam2_16	2	NA	NA	NA	327	327	NA	224	224	NA	NA	NA	NA	140	140	NA	188	196	NA	103	115	NA	187	193	NA	359	363	NA	336	344	NA	360	360	NA	197	201	NA	173	175	NA	222	222	NA	154	156	NA	113	117	NA
M13		124	152		319	343		224	224		234	242		140	144		196	208		103	115		187	197		359	365		336	372		346	360		191	197		173	175		222	222		156	168		109	113
M2		148	164		327	343		224	224		206	238		140	140		188	200		103	115		187	193		363	365		344	372		352	360		197	201		173	175		220	222		154	154		117	125
		inherit two paternal alleles
2022-PLATE-69_2022-137_37-2N_Fam2_17	2	152	152	164	343	343	NA	224	224	NA	NA	NA	NA	140	140	NA	188	208	NA	115	115	NA	187	187	NA	359	365	NA	336	372	NA	352	360	NA	197	201	NA	173	175	NA	222	222	NA	154	156	NA	109	125	NA
M13		124	152		319	343		224	224		234	242		140	144		196	208		103	115		187	197		359	365		336	372		346	360		191	197		173	175		222	222		156	168		109	113
M2		148	164		327	343		224	224		206	238		140	140		188	200		103	115		187	193		363	365		344	372		352	360		197	201		173	175		220	222		154	154		117	125
		inherit two paternal alleles
2022-PLATE-69_2022-137_38-2N_Fam2_18	2	148	152	152	343	343	NA	224	224	NA	NA	NA	NA	140	144	NA	200	208	NA	103	103	NA	193	197	NA	365	365	NA	344	372	NA	360	360	NA	191	197	NA	173	175	NA	220	222	NA	NA	NA	NA	113	125	NA
M13		124	152		319	343		224	224		234	242		140	144		196	208		103	115		187	197		359	365		336	372		346	360		191	197		173	175		222	222		156	168		109	113
M2		148	164		327	343		224	224		206	238		140	140		188	200		103	115		187	193		363	365		344	372		352	360		197	201		173	175		220	222		154	154		117	125

2022-PLATE-69_2022-137_39-2N_Fam2_19	2	NA	NA	NA	NA	NA	NA	NA	NA	NA	NA	NA	NA	NA	NA	NA	188	208	NA	103	115	NA	187	193	NA	363	365	NA	336	372	NA	346	360	NA	197	201	NA	173	175	NA	222	222	NA	154	156	NA	113	125	NA
M13		124	152		319	343		224	224		234	242		140	144		196	208		103	115		187	197		359	365		336	372		346	360		191	197		173	175		222	222		156	168		109	113
M2		148	164		327	343		224	224		206	238		140	140		188	200		103	115		187	193		363	365		344	372		352	360		197	201		173	175		220	222		154	154		117	125
					inherit two paternal alleles
2022-PLATE-69_2022-137_40-2N_Fam2_20	2	124	164	NA	319	319	343	224	224	NA	NA	NA	NA	140	144	NA	200	208	NA	103	103	NA	187	187	NA	359	365	NA	336	372	NA	352	360	NA	191	201	NA	173	175	NA	220	222	NA	154	168	NA	109	125	NA
M13		124	152		319	343		224	224		234	242		140	144		196	208		103	115		187	197		359	365		336	372		346	360		191	197		173	175		222	222		156	168		109	113
M2		148	164		327	343		224	224		206	238		140	140		188	200		103	115		187	193		363	365		344	372		352	360		197	201		173	175		220	222		154	154		117	125
		inherit two paternal alleles
2022-PLATE-69_2022-137_41-2N_Fam3_01	3	152	152	164	NA	NA	NA	NA	NA	NA	NA	NA	NA	140	144	NA	192	208	NA	103	115	NA	187	195	NA	359	365	NA	336	352	NA	346	346	NA	191	197	NA	173	173	NA	220	222	NA	156	156	NA	113	149	NA
M13		124	152		319	343		224	224		234	242		140	144		196	208		103	115		187	197		359	365		336	372		346	360		191	197		173	175		222	222		156	168		109	113
M3		148	164		315	339		244	244		238	246		140	140		192	224		115	115		193	195		359	359		344	352		346	352		197	201		173	173		220	220		156	156		125	149
																				inherit two paternal alleles
2022-PLATE-69_2022-137_48-2N_Fam3_08	3	124	148	NA	315	343	NA	NA	NA	NA	NA	NA	NA	140	144	NA	NA	NA	NA	103	103	115	195	197	NA	359	365	NA	344	372	NA	352	360	NA	191	197	NA	173	175	NA	220	222	NA	156	168	NA	113	149	NA
M13		124	152		319	343		224	224		234	242		140	144		196	208		103	115		187	197		359	365		336	372		346	360		191	197		173	175		222	222		156	168		109	113
M3		148	164		315	339		244	244		238	246		140	140		192	224		115	115		193	195		359	359		344	352		346	352		197	201		173	173		220	220		156	156		125	149
					inherit two paternal alleles
2022-PLATE-69_2022-137_49-2N_Fam3_09	3	NA	NA	NA	339	343	343	NA	NA	NA	NA	NA	NA	140	140	NA	196	224	NA	115	115	NA	195	197	NA	359	365	NA	352	372	NA	352	360	NA	197	197	NA	173	175	NA	220	222	NA	156	156	NA	113	125	NA
M13		124	152		319	343		224	224		234	242		140	144		196	208		103	115		187	197		359	365		336	372		346	360		191	197		173	175		222	222		156	168		109	113
M3		148	164		315	339		244	244		238	246		140	140		192	224		115	115		193	195		359	359		344	352		346	352		197	201		173	173		220	220		156	156		125	149
		inherit two paternal alleles			inherit two paternal alleles
2022-PLATE-69_2022-137_50-2N_Fam3_10	3	152	152	164	339	343	343	NA	NA	NA	NA	NA	NA	140	140	NA	196	224	NA	103	115	NA	187	195	NA	359	359	NA	336	352	NA	346	352	NA	197	197	NA	173	173	NA	220	222	NA	156	156	NA	113	125	NA
M13		124	152		319	343		224	224		234	242		140	144		196	208		103	115		187	197		359	365		336	372		346	360		191	197		173	175		222	222		156	168		109	113
M3		148	164		315	339		244	244		238	246		140	140		192	224		115	115		193	195		359	359		344	352		346	352		197	201		173	173		220	220		156	156		125	149
					missing paternal allele , maybe base shift -4
2022-PLATE-69_2022-137_51-2N_Fam3_11	3	NA	NA	NA	339	339	NA	NA	NA	NA	NA	NA	NA	140	140	NA	192	208	NA	115	115	NA	195	197	NA	359	365	NA	344	372	NA	346	360	NA	197	201	NA	173	173	NA	220	222	NA	156	168	NA	109	125	NA
M13		124	152		319	343		224	224		234	242		140	144		196	208		103	115		187	197		359	365		336	372		346	360		191	197		173	175		222	222		156	168		109	113
M3		148	164		315	339		244	244		238	246		140	140		192	224		115	115		193	195		359	359		344	352		346	352		197	201		173	173		220	220		156	156		125	149
					missing paternal allele , maybe base shift 4
					allele 2 not in any parent , maybe base shift 4
2022-PLATE-74_2022-137_158-2N_Fam8_18	8	124	152	NA	315	323	NA	216	224	NA	NA	NA	NA	140	144	NA	196	196	NA	103	121	NA	197	197	NA	363	365	NA	372	372	NA	346	360	NA	191	201	NA	173	173	NA	222	222	NA	154	156	NA	113	153	NA
M13		124	152		319	343		224	224		234	242		140	144		196	208		103	115		187	197		359	365		336	372		346	360		191	197		173	175		222	222		156	168		109	113
M8		132	152		315	343		216	244		218	222		140	140		196	200		121	121		181	197		359	363		344	372		346	346		191	201		173	173		222	226		154	154		125	153
																				missing maternal allele , maybe base shift -6
2022-PLATE-74_2022-137_154-2N_Fam8_14	8	132	152	NA	343	343	NA	224	244	NA	NA	NA	NA	140	140	NA	NA	NA	NA	115	115	NA	181	197	NA	359	363	NA	344	372	NA	346	360	NA	197	201	NA	173	173	NA	222	222	NA	154	168	NA	113	153	NA
M13		124	152		319	343		224	224		234	242		140	144		196	208		103	115		187	197		359	365		336	372		346	360		191	197		173	175		222	222		156	168		109	113
M8		132	152		315	343		216	244		218	222		140	140		196	200		121	121		181	197		359	363		344	372		346	346		191	201		173	173		222	226		154	154		125	153
					allele 1 not in any parent , maybe base shift -4
2022-PLATE-74_2022-137_153-2N_Fam8_13	8	124	132	NA	339	343	NA	224	244	NA	NA	NA	NA	140	140	NA	196	200	NA	103	121	NA	187	197	NA	359	359	NA	336	372	NA	346	360	NA	191	197	NA	173	175	NA	222	222	NA	154	156	NA	109	125	NA
M13		124	152		319	343		224	224		234	242		140	144		196	208		103	115		187	197		359	365		336	372		346	360		191	197		173	175		222	222		156	168		109	113
M8		132	152		315	343		216	244		218	222		140	140		196	200		121	121		181	197		359	363		344	372		346	346		191	201		173	173		222	226		154	154		125	153


2022-PLATE-74_2022-137_146-2N_Fam8_06	8	124	132	NA	343	343	NA	216	224	NA	NA	NA	NA	140	140	NA	196	208	NA	115	121	NA	181	187	NA	359	363	NA	336	344	NA	346	360	NA	191	197	NA	173	173	NA	222	222	NA	154	168	NA	109	125	NA
M13		124	152		319	343		224	224		234	242		140	144		196	208		103	115		187	197		359	365		336	372		346	360		191	197		173	175		222	222		156	168		109	113
M8		132	152		315	343		216	244		218	222		140	140		196	200		121	121		181	197		359	363		344	372		346	346		191	201		173	173		222	226		154	154		125	153
																	inherit two paternal alleles
2022-PLATE-74_2022-137_110-2N_Fam6_10	6	124	124	NA	343	343	NA	224	224	NA	NA	NA	NA	140	144	NA	188	208	208	103	115	NA	195	197	NA	359	365	NA	372	372	NA	346	360	NA	191	191	NA	173	173	NA	220	222	NA	156	158	NA	109	117	NA
M13		124	152		319	343		224	224		234	242		140	144		196	208		103	115		187	197		359	365		336	372		346	360		191	197		173	175		222	222		156	168		109	113
M6		124	148		339	343		224	249		218	234		140	144		188	200		103	103		195	197		359	363		364	372		346	346		191	197		173	175		220	220		158	158		117	125
																	missing paternal allele , maybe base shift 4
2022-PLATE-74_2022-137_109-2N_Fam6_09	6	124	124	NA	343	343	NA	224	249	NA	NA	NA	NA	140	144	NA	200	200	NA	103	115	NA	197	197	NA	363	365	NA	364	372	NA	346	346	NA	NA	NA	NA	173	175	NA	220	222	NA	156	158	NA	NA	NA	NA
M13		124	152		319	343		224	224		234	242		140	144		196	208		103	115		187	197		359	365		336	372		346	360		191	197		173	175		222	222		156	168		109	113
M6		124	148		339	343		224	249		218	234		140	144		188	200		103	103		195	197		359	363		364	372		346	346		191	197		173	175		220	220		158	158		117	125
					missing paternal allele , maybe base shift -4
2022-PLATE-74_2022-137_185-2N_Fam10_05	10	148	152	NA	315	315	NA	224	249	NA	NA	NA	NA	140	144	NA	176	208	NA	115	115	NA	195	197	NA	365	365	NA	352	372	NA	346	352	NA	191	201	NA	173	173	NA	220	222	NA	156	156	NA	113	125	NA
M13		124	152		319	343		224	224		234	242		140	144		196	208		103	115		187	197		359	365		336	372		346	360		191	197		173	175		222	222		156	168		109	113
M10		124	148		315	339		224	249		238	246		140	144		176	224		115	121		187	195		363	365		352	352		352	360		197	201		173	173		220	222		154	156		125	153
																				inherit two paternal alleles
2022-PLATE-75_2022-137_202-2N_Fam11_02	11	124	152	NA	319	343	NA	224	224	NA	NA	NA	NA	140	144	NA	200	208	NA	103	103	121	187	187	NA	359	365	NA	336	344	NA	346	360	NA	191	201	NA	173	175	NA	222	226	NA	154	156	NA	113	153	NA
M13		124	152		319	343		224	224		234	242		140	144		196	208		103	115		187	197		359	365		336	372		346	360		191	197		173	175		222	222		156	168		109	113
M11		124	148		331	343		224	244		218	222		140	140		200	200		121	121		187	197		359	365		340	344		346	346		191	201		173	173		222	226		154	154		125	153
																				inherit two paternal alleles
2022-PLATE-75_2022-137_204-2N_Fam11_04	11	124	124	NA	319	343	NA	224	244	NA	NA	NA	NA	140	140	NA	NA	NA	NA	103	103	121	187	187	NA	365	365	NA	336	344	NA	346	346	NA	191	197	NA	173	175	NA	222	222	NA	154	168	NA	113	153	NA
M13		124	152		319	343		224	224		234	242		140	144		196	208		103	115		187	197		359	365		336	372		346	360		191	197		173	175		222	222		156	168		109	113
M11		124	148		331	343		224	244		218	222		140	140		200	200		121	121		187	197		359	365		340	344		346	346		191	201		173	173		222	226		154	154		125	153
																				inherit two paternal alleles
2022-PLATE-75_2022-137_211-2N_Fam11_11	11	124	148	NA	319	331	NA	224	224	NA	NA	NA	NA	140	144	NA	196	200	NA	103	103	121	197	197	NA	359	365	NA	340	372	NA	346	360	NA	191	201	NA	173	173	NA	222	222	NA	154	168	NA	109	125	NA
M13		124	152		319	343		224	224		234	242		140	144		196	208		103	115		187	197		359	365		336	372		346	360		191	197		173	175		222	222		156	168		109	113
M11		124	148		331	343		224	244		218	222		140	140		200	200		121	121		187	197		359	365		340	344		346	346		191	201		173	173		222	226		154	154		125	153
																				inherit two paternal alleles
2022-PLATE-75_2022-137_213-2N_Fam11_13	11	124	148	NA	331	343	NA	224	244	NA	222	234	NA	140	140	NA	NA	NA	NA	103	103	121	197	197	NA	359	359	NA	344	372	NA	346	360	NA	191	197	NA	173	173	NA	222	222	NA	154	156	NA	109	125	NA
M13		124	152		319	343		224	224		234	242		140	144		196	208		103	115		187	197		359	365		336	372		346	360		191	197		173	175		222	222		156	168		109	113
M11		124	148		331	343		224	244		218	222		140	140		200	200		121	121		187	197		359	365		340	344		346	346		191	201		173	173		222	226		154	154		125	153
																				inherit two paternal alleles
2022-PLATE-75_2022-137_214-2N_Fam11_14	11	148	152	NA	343	343	NA	224	244	NA	218	234	NA	140	140	NA	NA	NA	NA	103	103	121	187	197	NA	365	365	NA	344	372	NA	346	346	NA	197	201	NA	173	175	NA	222	222	NA	154	168	NA	109	153	NA
M13		124	152		319	343		224	224		234	242		140	144		196	208		103	115		187	197		359	365		336	372		346	360		191	197		173	175		222	222		156	168		109	113
M11		124	148		331	343		224	244		218	222		140	140		200	200		121	121		187	197		359	365		340	344		346	346		191	201		173	173		222	226		154	154		125	153
																				inherit two paternal alleles
2022-PLATE-75_2022-137_215-2N_Fam11_15	11	148	152	NA	319	331	NA	224	244	NA	NA	NA	NA	140	140	NA	NA	NA	NA	103	103	121	187	197	NA	359	359	NA	336	344	NA	346	346	NA	197	201	NA	173	175	NA	222	226	NA	154	168	NA	109	125	NA
M13		124	152		319	343		224	224		234	242		140	144		196	208		103	115		187	197		359	365		336	372		346	360		191	197		173	175		222	222		156	168		109	113
M11		124	148		331	343		224	244		218	222		140	140		200	200		121	121		187	197		359	365		340	344		346	346		191	201		173	173		222	226		154	154		125	153
																				inherit two paternal alleles
2022-PLATE-75_2022-137_217-2N_Fam11_17	11	124	148	NA	319	331	NA	224	224	NA	NA	NA	NA	140	140	NA	NA	NA	NA	103	103	121	197	197	NA	359	365	NA	340	372	NA	346	360	NA	191	197	NA	173	173	NA	222	226	NA	154	156	NA	109	153	NA
M13		124	152		319	343		224	224		234	242		140	144		196	208		103	115		187	197		359	365		336	372		346	360		191	197		173	175		222	222		156	168		109	113
M11		124	148		331	343		224	244		218	222		140	140		200	200		121	121		187	197		359	365		340	344		346	346		191	201		173	173		222	226		154	154		125	153
																				inherit two paternal alleles
2022-PLATE-75_2022-137_218-2N_Fam11_18	11	124	152	NA	319	331	NA	224	224	NA	218	242	NA	140	144	NA	NA	NA	NA	103	103	121	197	197	NA	359	365	NA	340	372	NA	346	346	NA	191	201	NA	173	173	NA	222	222	NA	154	156	NA	113	125	NA
M13		124	152		319	343		224	224		234	242		140	144		196	208		103	115		187	197		359	365		336	372		346	360		191	197		173	175		222	222		156	168		109	113
M11		124	148		331	343		224	244		218	222		140	140		200	200		121	121		187	197		359	365		340	344		346	346		191	201		173	173		222	226		154	154		125	153
																				inherit two paternal alleles
2022-PLATE-75_2022-137_220-2N_Fam11_20	11	NA	NA	NA	NA	NA	NA	224	224	NA	NA	NA	NA	140	144	NA	200	208	NA	103	103	121	197	197	NA	359	365	NA	344	372	NA	346	360	NA	191	191	NA	173	175	NA	222	226	NA	154	156	NA	113	153	NA
M13		124	152		319	343		224	224		234	242		140	144		196	208		103	115		187	197		359	365		336	372		346	360		191	197		173	175		222	222		156	168		109	113
M11		124	148		331	343		224	244		218	222		140	140		200	200		121	121		187	197		359	365		340	344		346	346		191	201		173	173		222	226		154	154		125	153
																							inherit two paternal alleles															inherit two paternal alleles
2022-PLATE-75_2022-137_226-2N_Fam12_06	12	124	152	152	343	343	NA	224	224	NA	NA	NA	NA	140	144	144	NA	NA	NA	103	103	115	187	187	195	359	359	365	NA	NA	NA	346	352	360	191	195	197	173	175	175	220	222	222	154	156	168	109	113	117
M13		124	152		319	343		224	224		234	242		140	144		196	208		103	115		187	197		359	365		336	372		346	360		191	197		173	175		222	222		156	168		109	113
M12		124	152		343	343		224	224		218	222		144	144		176	200		103	115		195	195		359	365		340	364		346	352		191	195		173	173		220	226		154	156		117	125
					allele 1 not in any parent , maybe base shift 4
2022-PLATE-75_2022-1458_12-3N_Fam1_12	1	148	152	164	323	343	343	224	244	249	222	234	242	140	140	144	NA	NA	NA	115	115	NA	187	195	197	359	359	363	336	364	372	346	346	NA	191	191	201	173	173	175	220	222	226	154	168	168	113	125	125
M13		124	152		319	343		224	224		234	242		140	144		196	208		103	115		187	197		359	365		336	372		346	360		191	197		173	175		222	222		156	168		109	113
M1		148	164		343	343		244	249		222	234		140	140		200	200		115	115		195	197		359	363		364	372		346	346		191	201		173	173		220	226		154	168		125	125

2022-PLATE-75_2022-1458_18-3N_Fam1_18	1	148	152	164	343	343	NA	224	244	249	222	222	234	140	140	144	NA	NA	NA	103	115	115	187	195	197	359	359	363	336	364	372	346	346	NA	191	191	201	173	173	175	220	222	226	154	156	168	109	125	125
M13		124	152		319	343		224	224		234	242		140	144		196	208		103	115		187	197		359	365		336	372		346	360		191	197		173	175		222	222		156	168		109	113
M1		148	164		343	343		244	249		222	234		140	140		200	200		115	115		195	197		359	363		364	372		346	346		191	201		173	173		220	226		154	168		125	125
		missing maternal allele , maybe base shift 4																					missing maternal allele , maybe base shift 4									missing maternal allele , maybe base shift -6												missing maternal allele			missing maternal allele , maybe base shift -4
2022-PLATE-75_2022-1458_21-3N_Fam2_01	2	152	152	NA	343	343	NA	224	224	NA	NA	NA	NA	140	140	NA	NA	NA	NA	115	115	NA	197	197	NA	365	365	NA	372	372	NA	346	346	NA	197	197	NA	175	175	NA	222	222	NA	168	168	NA	113	113	NA
M13		124	152		319	343		224	224		234	242		140	144		196	208		103	115		187	197		359	365		336	372		346	360		191	197		173	175		222	222		156	168		109	113
M2		148	164		327	343		224	224		206	238		140	140		188	200		103	115		187	193		363	365		344	372		352	360		197	201		173	175		220	222		154	154		117	125
		missing maternal allele , maybe base shift 4																					missing maternal allele , maybe base shift 4									missing maternal allele , maybe base shift -6												missing maternal allele			missing maternal allele
2022-PLATE-75_2022-1458_23-3N_Fam2_03	2	152	152	NA	343	343	NA	224	224	NA	NA	NA	NA	140	140	NA	NA	NA	NA	103	103	NA	197	197	NA	365	365	NA	372	372	NA	346	346	NA	197	197	NA	173	173	NA	222	222	NA	168	168	NA	109	109	NA
M13		124	152		319	343		224	224		234	242		140	144		196	208		103	115		187	197		359	365		336	372		346	360		191	197		173	175		222	222		156	168		109	113
M2		148	164		327	343		224	224		206	238		140	140		188	200		103	115		187	193		363	365		344	372		352	360		197	201		173	175		220	222		154	154		117	125
					allele 1 not in any parent , maybe base shift -4
					allele 2 not in any parent , maybe base shift -4
2022-PLATE-75_2022-1458_28-3N_Fam2_08	2	124	148	164	339	339	343	224	224	NA	NA	NA	NA	140	140	NA	188	196	200	NA	NA	NA	187	193	197	363	365	365	344	372	372	352	360	360	197	197	201	175	175	NA	220	222	222	154	154	168	109	117	125
M13		124	152		319	343		224	224		234	242		140	144		196	208		103	115		187	197		359	365		336	372		346	360		191	197		173	175		222	222		156	168		109	113
M2		148	164		327	343		224	224		206	238		140	140		188	200		103	115		187	193		363	365		344	372		352	360		197	201		173	175		220	222		154	154		117	125
																							allele 1 not in any parent , maybe base shift -2
2022-PLATE-75_2022-1458_7-3N_Fam1_07	1	148	152	NA	343	343	NA	224	249	NA	222	242	NA	140	140	NA	NA	NA	NA	115	115	NA	185	195	197	359	363	365	364	372	372	346	360	NA	191	197	201	173	173	NA	220	222	NA	154	156	168	113	125	NA
M13		124	152		319	343		224	224		234	242		140	144		196	208		103	115		187	197		359	365		336	372		346	360		191	197		173	175		222	222		156	168		109	113
M1		148	164		343	343		244	249		222	234		140	140		200	200		115	115		195	197		359	363		364	372		346	346		191	201		173	173		220	226		154	168		125	125
											allele 1 not in any parent , maybe base shift -4
2022-PLATE-76_2022-1458_125-3N_Fam7_05	7	124	132	152	315	319	339	NA	NA	NA	230	234	234	140	144	144	176	200	208	103	121	121	187	189	197	363	363	365	372	372	NA	346	346	352	195	195	197	173	173	NA	220	220	222	154	154	156	109	117	149
M13		124	152		319	343		224	224		234	242		140	144		196	208		103	115		187	197		359	365		336	372		346	360		191	197		173	175		222	222		156	168		109	113
M7		124	132		315	339		244	249		234	234		140	144		176	200		121	121		187	189		363	365		372	372		346	352		195	197		173	173		220	220		154	156		117	149
					missing paternal allele , maybe base shift -4
2022-PLATE-76_2022-1458_57-3N_Fam3_17	3	124	148	164	315	315	339	NA	NA	NA	238	242	246	140	140	144	192	196	224	115	115	NA	187	195	195	359	359	365	336	344	352	346	346	NA	191	197	201	173	173	NA	220	220	222	156	156	NA	109	125	149
M13		124	152		319	343		224	224		234	242		140	144		196	208		103	115		187	197		359	365		336	372		346	360		191	197		173	175		222	222		156	168		109	113
M3		148	164		315	339		244	244		238	246		140	140		192	224		115	115		193	195		359	359		344	352		346	352		197	201		173	173		220	220		156	156		125	149
																	missing paternal allele , maybe base shift 4
																	allele 3 not in any parent , maybe base shift 4
2022-PLATE-77_2022-1458_203-3N_Fam11_03	11	NA	NA	NA	NA	NA	NA	224	224	244	218	222	234	140	140	144	200	200	212	115	121	121	187	187	197	359	359	NA	336	340	344	346	346	NA	191	191	201	173	173	NA	222	222	226	154	154	156	109	125	153
M13		124	152		319	343		224	224		234	242		140	144		196	208		103	115		187	197		359	365		336	372		346	360		191	197		173	175		222	222		156	168		109	113
M11		124	148		331	343		224	244		218	222		140	140		200	200		121	121		187	197		359	365		340	344		346	346		191	201		173	173		222	226		154	154		125	153
														missing maternal allele , maybe base shift -4
2022-PLATE-77_2022-1458_228-3N_Fam12_08	12	NA	NA	NA	NA	NA	NA	224	224	NA	218	234	NA	140	140	NA	NA	NA	NA	115	115	NA	NA	NA	NA	359	359	365	340	364	372	346	352	360	195	197	NA	173	173	NA	222	226	NA	156	156	NA	113	125	NA
M13		124	152		319	343		224	224		234	242		140	144		196	208		103	115		187	197		359	365		336	372		346	360		191	197		173	175		222	222		156	168		109	113
M12		124	152		343	343		224	224		218	222		144	144		176	200		103	115		195	195		359	365		340	364		346	352		191	195		173	173		220	226		154	156		117	125
[truncated: 9 more columns]

## Sheet: Experiment 2_parr
Offspring/parent ID	family	SSsp2210	SSsp2210	SSsp2210	SsaD157	SsaD157	SsaD157	Sp1605	Sp1605	Sp1605	Sp2216	Sp2216	Sp2216	Ssa14	Ssa14	Ssa14	Ssa197	Ssa197	Ssa197	SsaF43	SsaF43	SsaF43	SsOsl85	SsOsl85	SsOsl85	EST107	EST107	EST107	EST19	EST19	EST19	EST28	EST28	EST28	EST68	EST68	EST68	Sleel53	Sleel53	Sleel53	Sleen82	Sleen82	Sleen82	SsOSL25	SsOSL25	SsOSL25	SsSP2215	SsSP2215	SsSP2215
					missing paternal allele , maybe base shift 4
					allele 2 not in any parent , maybe base shift 4
2022-PLATE-175_2022-2183_10-Ploidy_2N_R1_010	7	124	132	NA	339	347	NA	224	244	NA	234	242	NA	140	144	NA	196	200	NA	115	121	NA	187	197	NA	359	363	NA	372	372	NA	346	360	NA	197	197	NA	173	173	NA	220	222	NA	154	168	NA	113	149	NA
M13		124	152		319	343		224	224		234	242		140	144		196	208		103	115		187	197		359	365		336	372		346	360		191	197		173	175		222	222		156	168		109	113
M7		124	132		315	339		244	249		234	234		140	144		176	200		121	121		187	189		363	365		372	372		346	352		195	197		173	173		220	220		154	156		117	149
																																												inherit two paternal alleles
2022-PLATE-175_2022-2183_22-Ploidy_2N_R1_022	12	152	152	NA	319	343	NA	224	224	NA	222	242	NA	140	144	NA	196	200	NA	103	103	NA	187	195	NA	359	365	NA	336	340	NA	352	360	NA	195	197	NA	173	173	NA	220	222	NA	154	168	168	109	117	NA
M13		124	152		319	343		224	224		234	242		140	144		196	208		103	115		187	197		359	365		336	372		346	360		191	197		173	175		222	222		156	168		109	113
M12		124	152		343	343		224	224		218	222		144	144		176	200		103	115		195	195		359	365		340	364		346	352		191	195		173	173		220	226		154	156		117	125
					allele 2 not in any parent , maybe base shift 4
2022-PLATE-176_2022-2183_101-Ploidy_2N_R1_101	1	124	164	NA	343	347	NA	224	244	NA	234	234	NA	140	140	NA	196	200	NA	103	115	NA	197	197	NA	363	365	NA	364	372	NA	346	346	NA	197	201	NA	173	175	NA	222	226	NA	154	156	NA	113	125	NA
M13		124	152		319	343		224	224		234	242		140	144		196	208		103	115		187	197		359	365		336	372		346	360		191	197		173	175		222	222		156	168		109	113
M1		148	164		343	343		244	249		222	234		140	140		200	200		115	115		195	197		359	363		364	372		346	346		191	201		173	173		220	226		154	168		125	125
		missing maternal allele , maybe base shift 4									missing maternal allele , maybe base shift -4						missing maternal allele , maybe base shift -4						missing maternal allele , maybe base shift 4																					missing maternal allele , maybe base shift 2			missing maternal allele , maybe base shift -4
2022-PLATE-176_2022-2183_133-Ploidy_2N_R1_133	2	152	152	NA	343	343	NA	224	224	NA	234	242	NA	140	144	NA	196	208	NA	115	115	NA	197	197	NA	365	365	NA	372	372	NA	346	360	NA	191	197	NA	173	173	NA	222	222	NA	156	168	NA	113	113	NA
M13		124	152		319	343		224	224		234	242		140	144		196	208		103	115		187	197		359	365		336	372		346	360		191	197		173	175		222	222		156	168		109	113
M2		148	164		327	343		224	224		206	238		140	140		188	200		103	115		187	193		363	365		344	372		352	360		197	201		173	175		220	222		154	154		117	125
					missing maternal allele , maybe base shift -4
					allele 2 not in any parent , maybe base shift -4
2022-PLATE-177_2022-2183_214-Ploidy_2N_R1_214	8	152	152	NA	319	339	NA	224	244	NA	218	242	NA	140	144	NA	196	200	NA	115	121	NA	197	197	NA	359	365	NA	372	372	NA	346	360	NA	191	201	NA	173	175	NA	222	222	NA	154	156	NA	109	153	NA
M13		124	152		319	343		224	224		234	242		140	144		196	208		103	115		187	197		359	365		336	372		346	360		191	197		173	175		222	222		156	168		109	113
M8		132	152		315	343		216	244		218	222		140	140		196	200		121	121		181	197		359	363		344	372		346	346		191	201		173	173		222	226		154	154		125	153
																																												inherit two paternal alleles
2022-PLATE-178_2022-2183_308-Ploidy_2N_R1_308	10	124	124	NA	319	339	NA	224	249	NA	238	242	NA	140	144	NA	NA	NA	NA	103	115	NA	187	187	NA	363	365	NA	336	352	NA	346	352	NA	191	197	NA	173	173	NA	220	222	NA	156	168	168	109	153	NA
M13		124	152		319	343		224	224		234	242		140	144		196	208		103	115		187	197		359	365		336	372		346	360		191	197		173	175		222	222		156	168		109	113
M10		124	148		315	339		224	249		238	246		140	144		176	224		115	121		187	195		363	365		352	352		352	360		197	201		173	173		220	222		154	156		125	153
																				inherit two paternal alleles
2022-PLATE-178_2022-2183_314-Ploidy_2N_R1_314	10	148	152	NA	319	339	NA	224	249	NA	234	246	NA	140	144	NA	176	208	NA	103	103	121	187	197	NA	363	365	NA	352	372	NA	346	352	NA	191	201	NA	173	175	NA	222	222	NA	154	156	NA	113	125	NA
M13		124	152		319	343		224	224		234	242		140	144		196	208		103	115		187	197		359	365		336	372		346	360		191	197		173	175		222	222		156	168		109	113
M10		124	148		315	339		224	249		238	246		140	144		176	224		115	121		187	195		363	365		352	352		352	360		197	201		173	173		220	222		154	156		125	153
					allele 1 not in any parent , maybe base shift -4
2022-PLATE-178_2022-2183_316-Ploidy_2N_R1_316	8	152	152	NA	339	343	NA	224	244	NA	222	242	NA	140	144	NA	NA	NA	NA	115	121	NA	181	197	NA	359	363	NA	372	372	NA	346	346	NA	191	191	NA	173	173	NA	222	222	NA	154	168	NA	113	125	NA
M13		124	152		319	343		224	224		234	242		140	144		196	208		103	115		187	197		359	365		336	372		346	360		191	197		173	175		222	222		156	168		109	113
M8		132	152		315	343		216	244		218	222		140	140		196	200		121	121		181	197		359	363		344	372		346	346		191	201		173	173		222	226		154	154		125	153


2022-PLATE-186_2022-2183_381-Ploidy_2N_R1_381	7	NA	NA	NA	NA	NA	NA	224	244	NA	234	234	NA	144	144	NA	196	200	NA	115	121	NA	187	187	NA	359	363	NA	336	372	NA	352	360	NA	191	195	NA	173	175	NA	220	222	NA	154	168	NA	113	149	NA
M13		124	152		319	343		224	224		234	242		140	144		196	208		103	115		187	197		359	365		336	372		346	360		191	197		173	175		222	222		156	168		109	113
M7		124	132		315	339		244	249		234	234		140	144		176	200		121	121		187	189		363	365		372	372		346	352		195	197		173	173		220	220		154	156		117	149
											missing maternal allele , maybe base shift 4
											allele 1 not in any parent , maybe base shift 4
2022-PLATE-186_2022-2183_409-Ploidy_2N_R1_409	6	124	148	NA	319	339	NA	224	249	NA	238	242	NA	140	144	NA	188	208	NA	103	103	NA	195	197	NA	359	359	NA	372	372	NA	346	360	NA	191	191	NA	173	175	NA	220	222	NA	158	168	NA	109	117	NA
M13		124	152		319	343		224	224		234	242		140	144		196	208		103	115		187	197		359	365		336	372		346	360		191	197		173	175		222	222		156	168		109	113
M6		124	148		339	343		224	249		218	234		140	144		188	200		103	103		195	197		359	363		364	372		346	346		191	197		173	175		220	220		158	158		117	125
					allele 2 not in any parent , maybe base shift 4
2022-PLATE-186_2022-2183_428-Ploidy_2N_R1_428	12	124	152	NA	343	347	NA	224	224	NA	218	242	NA	140	144	NA	176	196	NA	103	103	NA	187	195	NA	359	365	NA	336	364	NA	352	360	NA	195	197	NA	173	173	NA	220	222	NA	154	156	NA	109	125	NA
M13		124	152		319	343		224	224		234	242		140	144		196	208		103	115		187	197		359	365		336	372		346	360		191	197		173	175		222	222		156	168		109	113
M12		124	152		343	343		224	224		218	222		144	144		176	200		103	115		195	195		359	365		340	364		346	352		191	195		173	173		220	226		154	156		117	125
																	inherit two paternal alleles
2022-PLATE-186_2022-2183_440-Ploidy_2N_R1_440	10	124	148	NA	315	343	NA	224	249	NA	234	238	NA	140	144	NA	176	196	196	103	121	NA	195	197	NA	365	365	NA	352	372	NA	360	360	NA	197	201	NA	173	173	NA	220	222	NA	154	156	NA	109	125	NA
M13		124	152		319	343		224	224		234	242		140	144		196	208		103	115		187	197		359	365		336	372		346	360		191	197		173	175		222	222		156	168		109	113
M10		124	148		315	339		224	249		238	246		140	144		176	224		115	121		187	195		363	365		352	352		352	360		197	201		173	173		220	222		154	156		125	153
					allele 2 not in any parent , maybe base shift 4
2022-PLATE-189_2022-2328_58-Ploidy_2N_R2_058	6	124	152	NA	343	347	NA	NA	NA	NA	234	234	NA	144	144	NA	200	208	NA	103	115	NA	187	195	NA	359	365	NA	336	372	NA	346	346	NA	191	191	NA	173	175	NA	220	222	NA	156	158	NA	109	117	NA
M13		124	152		319	343		224	224		234	242		140	144		196	208		103	115		187	197		359	365		336	372		346	360		191	197		173	175		222	222		156	168		109	113
M6		124	148		339	343		224	249		218	234		140	144		188	200		103	103		195	197		359	363		364	372		346	346		191	197		173	175		220	220		158	158		117	125

2022-PLATE-190_2022-2328_107-Ploidy_2N_R2_107	11	124	148	NA	319	331	NA	224	224	NA	218	234	NA	140	140	NA	200	208	NA	115	121	NA	197	197	NA	359	365	NA	340	372	NA	346	346	NA	197	201	NA	173	173	NA	222	222	NA	154	168	NA	113	153	NA
M13		124	152		319	343		224	224		234	242		140	144		196	208		103	115		187	197		359	365		336	372		346	360		191	197		173	175		222	222		156	168		109	113
M11		124	148		331	343		224	244		218	222		140	140		200	200		121	121		187	197		359	365		340	344		346	346		191	201		173	173		222	226		154	154		125	153
																							allele 3 not in any parent , maybe base shift 2
2022-PLATE-211_2022-2333_12-Ploidy_3N_R1_012	11	124	124	148	319	331	343	224	224	244	218	218	234	140	140	NA	200	200	208	103	121	121	187	197	199	359	365	365	340	344	372	346	346	NA	191	197	201	173	173	175	222	222	NA	154	154	156	113	125	153
M13		124	152		319	343		224	224		234	242		140	144		196	208		103	115		187	197		359	365		336	372		346	360		191	197		173	175		222	222		156	168		109	113
M11		124	148		331	343		224	244		218	222		140	140		200	200		121	121		187	197		359	365		340	344		346	346		191	201		173	173		222	226		154	154		125	153
					allele 2 not in any parent , maybe base shift -4
2022-PLATE-211_2022-2333_15-Ploidy_3N_R1_015	8	132	152	152	315	339	343	216	224	244	218	222	242	140	140	NA	196	196	200	115	121	121	181	197	197	359	363	365	344	372	372	346	346	360	191	191	197	173	173	175	222	222	226	154	154	156	113	125	153
M13		124	152		319	343		224	224		234	242		140	144		196	208		103	115		187	197		359	365		336	372		346	360		191	197		173	175		222	222		156	168		109	113
M8		132	152		315	343		216	244		218	222		140	140		196	200		121	121		181	197		359	363		344	372		346	346		191	201		173	173		222	226		154	154		125	153
					allele 3 not in any parent , maybe base shift 4
2022-PLATE-211_2022-2333_40-Ploidy_3N_R1_040	6	124	124	148	339	343	347	224	224	249	218	234	234	140	144	144	188	200	208	103	103	115	187	195	195	359	359	NA	336	364	372	346	346	360	191	191	197	173	173	NA	220	220	222	156	158	158	109	117	125
M13		124	152		319	343		224	224		234	242		140	144		196	208		103	115		187	197		359	365		336	372		346	360		191	197		173	175		222	222		156	168		109	113
M6		124	148		339	343		224	249		218	234		140	144		188	200		103	103		195	197		359	363		364	372		346	346		191	197		173	175		220	220		158	158		117	125
					allele 2 not in any parent , maybe base shift -4
2022-PLATE-211_2022-2333_45-Ploidy_3N_R1_045	8	124	132	152	315	339	343	216	224	244	218	222	242	140	140	144	196	196	200	103	121	121	181	187	197	359	359	363	336	344	372	346	346	NA	191	191	201	173	173	175	222	222	226	154	154	168	113	125	153
M13		124	152		319	343		224	224		234	242		140	144		196	208		103	115		187	197		359	365		336	372		346	360		191	197		173	175		222	222		156	168		109	113
M8		132	152		315	343		216	244		218	222		140	140		196	200		121	121		181	197		359	363		344	372		346	346		191	201		173	173		222	226		154	154		125	153
					allele 3 not in any parent , maybe base shift -4
2022-PLATE-211_2022-2333_59-Ploidy_3N_R1_059	8	124	132	152	315	319	339	216	224	244	218	222	234	140	140	NA	196	200	208	103	121	121	187	197	197	359	359	NA	336	344	372	346	346	360	191	197	201	173	173	175	222	222	226	154	154	156	109	125	153
M13		124	152		319	343		224	224		234	242		140	144		196	208		103	115		187	197		359	365		336	372		346	360		191	197		173	175		222	222		156	168		109	113
M8		132	152		315	343		216	244		218	222		140	140		196	200		121	121		181	197		359	363		344	372		346	346		191	201		173	173		222	226		154	154		125	153
					allele 3 not in any parent , maybe base shift -4
2022-PLATE-212_2022-2333_130-Ploidy_3N_R1_130	8	124	132	152	315	319	339	216	224	244	218	222	242	140	140	144	196	196	200	103	121	121	181	187	197	359	359	363	336	344	372	346	346	360	191	191	201	173	173	175	222	222	226	154	154	156	113	125	153
M13		124	152		319	343		224	224		234	242		140	144		196	208		103	115		187	197		359	365		336	372		346	360		191	197		173	175		222	222		156	168		109	113
M8		132	152		315	343		216	244		218	222		140	140		196	200		121	121		181	197		359	363		344	372		346	346		191	201		173	173		222	226		154	154		125	153
					allele 3 not in any parent , maybe base shift 4
2022-PLATE-212_2022-2333_154-Ploidy_3N_R1_154	4	124	124	148	315	343	347	224	224	244	222	234	242	140	140	144	176	188	208	115	121	121	187	197	197	359	359	NA	336	340	364	346	352	360	191	191	195	173	173	NA	220	220	222	154	154	156	109	113	125
M13		124	152		319	343		224	224		234	242		140	144		196	208		103	115		187	197		359	365		336	372		346	360		191	197		173	175		222	222		156	168		109	113
M4		124	148		315	343		224	244		222	234		140	140		176	188		121	121		197	197		359	363		340	364		346	352		191	195		173	173		220	220		154	154		109	125
					allele 3 not in any parent , maybe base shift -4
2022-PLATE-212_2022-2333_95-Ploidy_3N_R1_095	8	152	152	NA	315	319	339	216	224	244	218	222	234	140	140	144	196	200	208	103	121	121	181	181	197	363	363	365	344	372	372	346	346	NA	191	191	201	173	173	175	222	222	226	154	154	156	113	125	153
M13		124	152		319	343		224	224		234	242		140	144		196	208		103	115		187	197		359	365		336	372		346	360		191	197		173	175		222	222		156	168		109	113
M8		132	152		315	343		216	244		218	222		140	140		196	200		121	121		181	197		359	363		344	372		346	346		191	201		173	173		222	226		154	154		125	153
					allele 1 not in any parent , maybe base shift -4
2023-PLATE-3_2022-2328_182-Ploidy_2N_R2_182	2	152	164	NA	339	343	NA	224	224	NA	206	242	NA	140	140	NA	188	196	NA	115	115	NA	187	193	NA	359	363	NA	336	344	NA	352	360	NA	197	201	NA	175	175	NA	222	222	NA	154	156	NA	113	117	NA
M13		124	152		319	343		224	224		234	242		140	144		196	208		103	115		187	197		359	365		336	372		346	360		191	197		173	175		222	222		156	168		109	113
M2		148	164		327	343		224	224		206	238		140	140		188	200		103	115		187	193		363	365		344	372		352	360		197	201		173	175		220	222		154	154		117	125
		allele 2 not in any parent
2023-PLATE-3_2022-2328_251-Ploidy_2N_R2_251	6	124	140	NA	343	343	NA	NA	NA	NA	218	242	NA	140	144	NA	188	196	NA	103	103	NA	195	197	NA	359	359	NA	372	372	NA	346	360	NA	191	191	NA	173	175	NA	220	222	NA	156	158	NA	113	125	NA
M13		124	152		319	343		224	224		234	242		140	144		196	208		103	115		187	197		359	365		336	372		346	360		191	197		173	175		222	222		156	168		109	113
M6		124	148		339	343		224	249		218	234		140	144		188	200		103	103		195	197		359	363		364	372		346	346		191	197		173	175		220	220		158	158		117	125
					allele 1 not in any parent , maybe base shift -4
2023-PLATE-5_2022-2328_318-Ploidy_2N_R2_318	8	152	152	NA	339	343	NA	224	244	NA	222	242	NA	140	144	NA	196	196	NA	115	121	NA	181	197	NA	363	365	NA	344	372	NA	346	346	NA	191	191	NA	173	173	NA	222	222	NA	154	168	NA	109	125	NA
M13		124	152		319	343		224	224		234	242		140	144		196	208		103	115		187	197		359	365		336	372		346	360		191	197		173	175		222	222		156	168		109	113
M8		132	152		315	343		216	244		218	222		140	140		196	200		121	121		181	197		359	363		344	372		346	346		191	201		173	173		222	226		154	154		125	153
					missing paternal allele , maybe base shift -4
2023-PLATE-6_2022-2328_446-Ploidy_2N_R2_446	3	124	148	NA	315	339	NA	224	244	NA	234	246	NA	140	144	NA	196	224	NA	103	115	NA	187	193	NA	359	359	NA	336	352	NA	346	346	NA	191	197	NA	173	175	NA	220	222	NA	156	156	NA	109	125	NA
M13		124	152		319	343		224	224		234	242		140	144		196	208		103	115		187	197		359	365		336	372		346	360		191	197		173	175		222	222		156	168		109	113
M3		148	164		315	339		244	244		238	246		140	140		192	224		115	115		193	195		359	359		344	352		346	352		197	201		173	173		220	220		156	156		125	149
																																												inherit two paternal alleles
2023-PLATE-7_2022-2328_458-Ploidy_2N_R2_458	6	124	152	NA	319	343	NA	224	224	NA	234	242	NA	140	144	NA	200	208	NA	103	103	NA	187	195	NA	359	365	NA	336	372	NA	346	360	NA	191	197	NA	173	175	NA	220	222	NA	158	168	168	109	117	NA
M13		124	152		319	343		224	224		234	242		140	144		196	208		103	115		187	197		359	365		336	372		346	360		191	197		173	175		222	222		156	168		109	113
M6		124	148		339	343		224	249		218	234		140	144		188	200		103	103		195	197		359	363		364	372		346	346		191	197		173	175		220	220		158	158		117	125
																													missing maternal allele , maybe base shift -4
																													allele 2 not in any parent , maybe base shift -4
2023-PLATE-7_2022-2331_9-Ploidy_2N_R2_509	12	124	124	NA	319	343	NA	224	224	NA	218	234	NA	144	144	NA	200	208	NA	103	103	NA	187	195	NA	359	365	NA	336	360	NA	346	352	NA	191	195	NA	173	173	NA	222	226	NA	154	156	NA	109	125	NA
M13		124	152		319	343		224	224		234	242		140	144		196	208		103	115		187	197		359	365		336	372		346	360		191	197		173	175		222	222		156	168		109	113
M12		124	152		343	343		224	224		218	222		144	144		176	200		103	115		195	195		359	365		340	364		346	352		191	195		173	173		220	226		154	156		117	125
																																									missing paternal allele , maybe base shift -2
2023-PLATE-14_2022-2333_163-Ploidy_3N_R1_163	10	124	124	148	319	339	339	224	224	249	234	238	246	140	144	144	NA	NA	NA	103	115	121	187	195	197	363	365	365	352	352	372	360	360	NA	197	197	201	173	173	NA	220	220	NA	154	156	168	109	125	153
M13		124	152		319	343		224	224		234	242		140	144		196	208		103	115		187	197		359	365		336	372		346	360		191	197		173	175		222	222		156	168		109	113
M10		124	148		315	339		224	249		238	246		140	144		176	224		115	121		187	195		363	365		352	352		352	360		197	201		173	173		220	222		154	156		125	153
					allele 2 not in any parent , maybe base shift -4
2023-PLATE-14_2022-2333_236-Ploidy_3N_R1_236	8	124	132	152	315	339	343	216	224	244	218	222	234	140	140	NA	NA	NA	NA	115	121	121	187	197	197	359	359	NA	336	344	372	346	346	360	191	197	201	173	173	NA	222	222	226	154	154	168	113	125	153
M13		124	152		319	343		224	224		234	242		140	144		196	208		103	115		187	197		359	365		336	372		346	360		191	197		173	175		222	222		156	168		109	113
M8		132	152		315	343		216	244		218	222		140	140		196	200		121	121		181	197		359	363		344	372		346	346		191	201		173	173		222	226		154	154		125	153
					allele 2 not in any parent , maybe base shift -4
2023-PLATE-14_2022-2333_248-Ploidy_3N_R1_248	8	124	132	152	315	339	343	216	224	244	218	222	242	140	140	NA	NA	NA	NA	115	121	121	NA	NA	NA	NA	NA	NA	344	344	372	346	346	360	191	197	201	173	173	175	222	226	226	154	154	168	109	125	153
M13		124	152		319	343		224	224		234	242		140	144		196	208		103	115		187	197		359	365		336	372		346	360		191	197		173	175		222	222		156	168		109	113
M8		132	152		315	343		216	244		218	222		140	140		196	200		121	121		181	197		359	363		344	372		346	346		191	201		173	173		222	226		154	154		125	153
					allele 2 not in any parent , maybe base shift -4
2023-PLATE-16_2022-2333_397-Ploidy_3N_R1_397	8	132	152	152	315	339	343	216	224	244	218	222	242	NA	NA	NA	196	196	200	115	121	121	181	197	197	359	363	365	344	372	372	346	346	360	191	191	197	173	173	175	222	222	226	154	154	168	109	125	153
M13		124	152		319	343		224	224		234	242		140	144		196	208		103	115		187	197		359	365		336	372		346	360		191	197		173	175		222	222		156	168		109	113
M8		132	152		315	343		216	244		218	222		140	140		196	200		121	121		181	197		359	363		344	372		346	346		191	201		173	173		222	226		154	154		125	153
																																									missing paternal allele , maybe base shift -2
2023-PLATE-16_2022-2333_427-Ploidy_3N_R1_427	7	124	124	132	315	339	343	NA	NA	NA	234	234	242	NA	NA	NA	176	176	196	115	121	121	187	189	197	363	365	365	372	372	NA	346	346	352	195	197	197	173	173	175	220	220	NA	156	156	168	113	117	149
M13		124	152		319	343		224	224		234	242		140	144		196	208		103	115		187	197		359	365		336	372		346	360		191	197		173	175		222	222		156	168		109	113
M7		124	132		315	339		244	249		234	234		140	144		176	200		121	121		187	189		363	365		372	372		346	352		195	197		173	173		220	220		154	156		117	149
					allele 3 not in any parent , maybe base shift 4
2023-PLATE-19_2022-2333_489-Ploidy_3N_R1_489	9	124	148	152	319	343	347	224	224	244	234	234	NA	NA	NA	NA	196	200	200	103	103	NA	181	187	197	360	363	365	344	372	372	346	346	360	191	195	201	173	173	NA	220	220	222	154	154	156	109	117	125
M13		124	152		319	343		224	224		234	242		140	144		196	208		103	115		187	197		359	365		336	372		346	360		191	197		173	175		222	222		156	168		109	113
M9		148	152		343	343		224	244		234	234		140	140		200	200		103	121		181	187		360	363		344	372		346	360		195	201		173	173		220	220		154	154		117	125
					allele 2 not in any parent , maybe base shift -4
2023-PLATE-19_2022-2333_497-Ploidy_3N_R1_497	8	124	132	152	315	339	343	216	224	244	218	222	242	140	140	NA	196	200	200	115	121	121	181	197	197	359	363	365	344	372	372	346	346	360	191	191	197	173	173	NA	222	226	226	154	154	168	109	125	153
M13		124	152		319	343		224	224		234	242		140	144		196	208		103	115		187	197		359	365		336	372		346	360		191	197		173	175		222	222		156	168		109	113
M8		132	152		315	343		216	244		218	222		140	140		196	200		121	121		181	197		359	363		344	372		346	346		191	201		173	173		222	226		154	154		125	153
					missing paternal allele , maybe base shift -4
2023-PLATE-19_2022-2338_16-Ploidy_3N_R3_016	10	148	148	152	315	315	339	224	224	249	238	242	246	140	144	144	176	208	224	103	115	121	187	187	195	359	363	365	336	352	352	352	360	360	197	197	201	173	173	175	220	222	222	154	156	168	109	125	153
M13		124	152		319	343		224	224		234	242		140	144		196	208		103	115		187	197		359	365		336	372		346	360		191	197		173	175		222	222		156	168		109	113
M10		124	148		315	339		224	249		238	246		140	144		176	224		115	121		187	195		363	365		352	352		352	360		197	201		173	173		220	222		154	156		125	153
					allele 3 not in any parent , maybe base shift -4
2023-PLATE-30_2022-2338_71-Ploidy_3N_R3_071	8	132	152	152	315	319	339	216	224	244	218	222	242	140	140	144	196	196	200	103	121	121	181	197	197	359	363	365	344	372	372	346	346	NA	191	191	201	173	173	175	222	222	226	154	154	156	113	125	153
M13		124	152		319	343		224	224		234	242		140	144		196	208		103	115		187	197		359	365		336	372		346	360		191	197		173	175		222	222		156	168		109	113
M8		132	152		315	343		216	244		218	222		140	140		196	200		121	121		181	197		359	363		344	372		346	346		191	201		173	173		222	226		154	154		125	153
					allele 1 not in any parent , maybe base shift -4
2023-PLATE-30_2022-2338_79-Ploidy_3N_R3_079	6	124	124	148	315	343	343	224	224	249	218	234	242	140	140	144	188	196	200	103	103	115	195	197	197	359	363	365	364	372	372	346	346	NA	191	191	197	173	173	175	220	220	222	156	158	158	109	117	125
M13		124	152		319	343		224	224		234	242		140	144		196	208		103	115		187	197		359	365		336	372		346	360		191	197		173	175		222	222		156	168		109	113
M6		124	148		339	343		224	249		218	234		140	144		188	200		103	103		195	197		359	363		364	372		346	346		191	197		173	175		220	220		158	158		117	125
																																									missing paternal allele , maybe base shift -2
2023-PLATE-31_2022-2338_148-Ploidy_3N_R3_148	5	124	124	132	331	331	343	NA	NA	NA	206	222	234	144	144	NA	188	200	208	103	103	115	193	195	197	359	363	365	344	372	372	346	352	360	191	195	195	173	173	NA	220	226	NA	154	156	158	109	117	125
M13		124	152		319	343		224	224		234	242		140	144		196	208		103	115		187	197		359	365		336	372		346	360		191	197		173	175		222	222		156	168		109	113
M5		124	132		331	331		224	224		206	222		144	144		188	200		103	115		193	195		359	363		344	372		346	352		195	195		173	173		220	226		154	158		117	125
					allele 2 not in any parent , maybe base shift -4
2023-PLATE-31_2022-2338_158-Ploidy_3N_R3_158	8	124	132	152	315	339	343	216	224	244	218	222	242	140	140	144	196	200	208	115	121	121	181	187	197	359	359	NA	336	344	372	346	346	360	191	191	NA	173	173	NA	222	222	226	154	154	156	113	125	153
M13		124	152		319	343		224	224		234	242		140	144		196	208		103	115		187	197		359	365		336	372		346	360		191	197		173	175		222	222		156	168		109	113
M8		132	152		315	343		216	244		218	222		140	140		196	200		121	121		181	197		359	363		344	372		346	346		191	201		173	173		222	226		154	154		125	153
					allele 2 not in any parent , maybe base shift -4
2023-PLATE-31_2022-2338_181-Ploidy_3N_R3_181	8	132	152	152	315	339	343	216	224	244	218	222	234	140	140	144	196	200	208	103	121	121	181	197	197	359	363	365	344	372	372	346	346	360	191	191	201	173	173	175	222	226	226	154	154	168	113	125	153
M13		124	152		319	343		224	224		234	242		140	144		196	208		103	115		187	197		359	365		336	372		346	360		191	197		173	175		222	222		156	168		109	113
M8		132	152		315	343		216	244		218	222		140	140		196	200		121	121		181	197		359	363		344	372		346	346		191	201		173	173		222	226		154	154		125	153

2023-PLATE-31_2022-2338_199-Ploidy_3N_R3_199	11	124	148	152	319	331	343	NA	NA	NA	218	222	234	140	140	NA	200	200	208	115	121	121	187	187	197	359	359	365	336	340	344	346	346	360	191	197	201	173	173	NA	222	222	226	154	154	168	109	125	153
M13		124	152		319	343		224	224		234	242		140	144		196	208		103	115		187	197		359	365		336	372		346	360		191	197		173	175		222	222		156	168		109	113
M11		124	148		331	343		224	244		218	222		140	140		200	200		121	121		187	197		359	365		340	344		346	346		191	201		173	173		222	226		154	154		125	153
					allele 1 not in any parent , maybe base shift -4
					allele 2 not in any parent , maybe base shift -4
2023-PLATE-31_2022-2338_202-Ploidy_3N_R3_202	8	124	132	152	339	339	343	216	224	244	218	222	242	140	140	144	196	200	208	115	121	121	181	197	197	359	363	365	344	372	372	346	346	360	191	191	201	173	173	NA	222	222	226	154	154	168	109	125	153
M13		124	152		319	343		224	224		234	242		140	144		196	208		103	115		187	197		359	365		336	372		346	360		191	197		173	175		222	222		156	168		109	113
M8		132	152		315	343		216	244		218	222		140	140		196	200		121	121		181	197		359	363		344	372		346	346		191	201		173	173		222	226		154	154		125	153
					allele 3 not in any parent , maybe base shift 4
2023-PLATE-31_2022-2338_204-Ploidy_3N_R3_204	4	124	124	148	315	343	347	224	224	244	222	234	242	140	140	144	176	188	196	103	121	121	187	197	197	359	363	365	336	340	364	346	352	360	191	195	195	173	173	NA	220	220	222	154	154	156	109	113	125
M13		124	152		319	343		224	224		234	242		140	144		196	208		103	115		187	197		359	365		336	372		346	360		191	197		173	175		222	222		156	168		109	113
M4		124	148		315	343		224	244		222	234		140	140		176	188		121	121		197	197		359	363		340	364		346	352		191	195		173	173		220	220		154	154		109	125
					allele 2 not in any parent
2023-PLATE-32_2022-2338_225-Ploidy_3N_R3_225	9	148	152	152	319	335	343	224	224	244	234	234	NA	140	140	144	196	200	200	103	103	121	181	187	197	360	363	365	344	372	372	346	360	360	191	201	201	173	173	NA	220	220	222	154	154	168	109	117	125
M13		124	152		319	343		224	224		234	242		140	144		196	208		103	115		187	197		359	365		336	372		346	360		191	197		173	175		222	222		156	168		109	113
M9		148	152		343	343		224	244		234	234		140	140		200	200		103	121		181	187		360	363		344	372		346	360		195	201		173	173		220	220		154	154		117	125
																										missing paternal allele , maybe base shift 1
2023-PLATE-32_2022-2338_271-Ploidy_3N_R3_271	9	148	152	152	319	343	343	224	224	244	234	234	NA	140	140	144	NA	NA	NA	103	103	121	181	187	NA	360	363	NA	NA	NA	NA	346	360	360	191	195	195	173	173	175	220	220	222	154	154	156	113	117	125
M13		124	152		319	343		224	224		234	242		140	144		196	208		103	115		187	197		359	365		336	372		346	360		191	197		173	175		222	222		156	168		109	113
M9		148	152		343	343		224	244		234	234		140	140		200	200		103	121		181	187		360	363		344	372		346	360		195	201		173	173		220	220		154	154		117	125
					allele 2 not in any parent , maybe base shift -4
2023-PLATE-33_2022-2338_381-Ploidy_3N_R3_381	8	124	132	152	315	339	343	216	224	244	218	222	242	140	140	144	NA	NA	NA	103	121	121	197	197	NA	359	359	365	344	372	372	346	346	360	191	191	NA	173	173	175	222	222	226	154	154	168	109	125	153
M13		124	152		319	343		224	224		234	242		140	144		196	208		103	115		187	197		359	365		336	372		346	360		191	197		173	175		222	222		156	168		109	113
M8		132	152		315	343		216	244		218	222		140	140		196	200		121	121		181	197		359	363		344	372		346	346		191	201		173	173		222	226		154	154		125	153
																	allele 2 not in any parent
2023-PLATE-34_2022-2338_411-Ploidy_3N_R3_411	10	124	148	152	315	319	339	224	224	249	238	242	246	144	144	NA	196	216	224	103	115	121	195	195	197	365	365	NA	352	352	372	346	352	360	191	197	201	173	173	NA	220	222	222	154	156	156	109	125	153
M13		124	152		319	343		224	224		234	242		140	144		196	208		103	115		187	197		359	365		336	372		346	360		191	197		173	175		222	222		156	168		109	113
M10		124	148		315	339		224	249		238	246		140	144		176	224		115	121		187	195		363	365		352	352		352	360		197	201		173	173		220	222		154	156		125	153
											allele 2 not in any parent , maybe base shift 4
2023-PLATE-34_2022-2338_426-Ploidy_3N_R3_426	9	124	152	152	343	343	NA	NA	NA	NA	234	238	242	140	140	144	196	200	200	115	121	121	181	187	197	360	363	365	344	372	372	346	360	360	191	195	201	173	173	175	220	220	222	154	154	156	109	117	125
M13		124	152		319	343		224	224		234	242		140	144		196	208		103	115		187	197		359	365		336	372		346	360		191	197		173	175		222	222		156	168		109	113
M9		148	152		343	343		224	244		234	234		140	140		200	200		103	121		181	187		360	363		344	372		346	360		195	201		173	173		220	220		154	154		117	125
					allele 3 not in any parent , maybe base shift 4
2023-PLATE-34_2022-2338_481-Ploidy_3N_R3_481	6	124	148	152	319	339	347	224	224	249	218	234	242	140	140	144	200	200	208	103	103	115	195	197	197	359	359	363	364	372	372	346	346	360	191	191	NA	173	173	NA	220	220	222	156	158	158	113	117	125
M13		124	152		319	343		224	224		234	242		140	144		196	208		103	115		187	197		359	365		336	372		346	360		191	197		173	175		222	222		156	168		109	113
M6		124	148		339	343		224	249		218	234		140	144		188	200		103	103		195	197		359	363		364	372		346	346		191	197		173	175		220	220		158	158		117	125
					allele 3 not in any parent , maybe base shift -4
2023-PLATE-38_2022-2338_493-Ploidy_3N_R3_493	8	124	152	152	315	319	339	216	224	244	218	222	242	140	140	NA	196	196	200	103	121	121	181	197	197	359	363	365	344	372	372	346	346	NA	191	197	201	173	173	NA	222	222	226	154	154	156	113	125	153
M13		124	152		319	343		224	224		234	242		140	144		196	208		103	115		187	197		359	365		336	372		346	360		191	197		173	175		222	222		156	168		109	113
M8		132	152		315	343		216	244		218	222		140	140		196	200		121	121		181	197		359	363		344	372		346	346		191	201		173	173		222	226		154	154		125	153

2023-PLATE-38_2022-2338_500-Ploidy_3N_R3_500	12	124	124	152	319	343	343	NA	NA	NA	218	222	234	144	144	NA	176	196	200	103	115	115	187	195	195	359	359	365	336	340	364	346	346	352	191	191	195	173	173	NA	220	222	226	154	156	156	109	117	125
M13		124	152		319	343		224	224		234	242		140	144		196	208		103	115		187	197		359	365		336	372		346	360		191	197		173	175		222	222		156	168		109	113
M12		124	152		343	343		224	224		218	222		144	144		176	200		103	115		195	195		359	365		340	364		346	352		191	195		173	173		220	226		154	156		117	125

2023-PLATE-38_2022-2341_19-Ploidy_3N_R3_519	9	148	152	152	319	343	343	224	224	244	234	234	NA	140	140	NA	196	200	200	103	121	121	181	187	197	359	360	363	344	372	372	346	360	360	195	197	201	173	173	NA	220	220	222	154	154	168	113	117	125
M13		124	152		319	343		224	224		234	242		140	144		196	208		103	115		187	197		359	365		336	372		346	360		191	197		173	175		222	222		156	168		109	113
M9		148	152		343	343		224	244		234	234		140	140		200	200		103	121		181	187		360	363		344	372		346	360		195	201		173	173		220	220		154	154		117	125
[truncated: 9 more columns]
