# Supplementary material for: Chromosomal aberrations and early mortality in a non-mammalian vertebrate: example from triploid-induced Atlantic salmon
Source: Research Square preprint supplement (doi:10.21203/rs.3.rs-4180820/v1), 2024-04-09
Supplement: Supplementary file 2 [file Genotypes.xlsx]

## Sheet: Experiment 1_eggs
Sample_Name	treatment	SSsp2201_allele1	SSsp2201_allele2	SSsp2201_allele3	SSsp2210_allele1	SSsp2210_allele2	SSsp2210_allele3	SsaD157_allele1	SsaD157_allele2	SsaD157_allele3	Sp1605_allele1	Sp1605_allele2	Sp1605_allele3	Sp2216_allele1	Sp2216_allele2	Sp2216_allele3	Ssa14_allele1	Ssa14_allele2	Ssa14_allele3	Ssa197_allele1	Ssa197_allele2	Ssa197_allele3	SsaF43_allele1	SsaF43_allele2	SsaF43_allele3	SsOsl85_allele1	SsOsl85_allele2	SsOsl85_allele3	EST107_allele1	EST107_allele2	EST107_allele3	EST19_allele1	EST19_allele2	EST19_allele3	EST28_allele1	EST28_allele2	EST28_allele3	EST68_allele1	EST68_allele2	EST68_allele3	Sleel53_allele1	Sleel53_allele2	Sleel53_allele3	Sleen82_allele1	Sleen82_allele2	Sleen82_allele3	SsOSL25_allele1	SsOSL25_allele2	SsOSL25_allele3
2022-PLATE-3_2022-102_1-0P_Fam1_R1_01	0 PSI	275	283	NA	148	152	NA	319	343	NA	224	249	NA	234	234	NA	140	144	NA	196	200	NA	103	115	NA	NA	NA	NA	359	365	NA	336	336	372	346	346	NA	191	191	NA	173	173	NA	220	222	NA	156	156	168
2022-PLATE-3_2022-102_10-0P_Fam1_R1_10	0 PSI	267	279	NA	124	164	NA	319	343	NA	224	244	NA	234	242	NA	140	144	NA	200	208	NA	115	115	NA	187	197	NA	359	363	NA	336	364	NA	346	346	NA	191	201	NA	173	173	NA	220	222	NA	168	168	NA
2022-PLATE-3_2022-102_11-0P_Fam1_R1_11	0 PSI	267	275	NA	124	148	NA	319	343	NA	224	249	NA	222	242	NA	140	140	NA	200	208	NA	115	115	NA	187	197	NA	359	363	NA	336	364	NA	346	346	NA	191	197	NA	173	173	NA	220	222	NA	154	156	NA
2022-PLATE-3_2022-102_12-0P_Fam1_R1_12	0 PSI	267	279	NA	124	148	NA	343	343	NA	224	249	NA	NA	NA	NA	140	144	NA	196	200	NA	115	115	NA	187	195	NA	359	359	NA	336	372	NA	NA	NA	NA	191	191	NA	173	173	NA	222	226	NA	168	168	NA
2022-PLATE-3_2022-102_13-0P_Fam1_R1_13	0 PSI	267	279	NA	148	152	NA	319	343	NA	NA	NA	NA	234	234	NA	140	144	NA	196	200	NA	115	115	NA	197	197	NA	359	363	NA	364	372	NA	346	360	NA	191	191	NA	173	175	NA	220	222	NA	154	156	NA
2022-PLATE-3_2022-102_14-0P_Fam1_R1_14	0 PSI	267	275	NA	148	152	NA	319	343	NA	NA	NA	NA	234	242	NA	NA	NA	NA	200	208	NA	103	115	NA	187	195	NA	359	359	NA	NA	NA	NA	346	360	NA	191	197	NA	173	175	NA	220	222	NA	168	168	NA
2022-PLATE-3_2022-102_15-0P_Fam1_R1_15	0 PSI	275	283	NA	124	148	NA	319	343	NA	224	244	NA	222	242	NA	140	144	NA	200	208	NA	103	115	NA	187	197	NA	359	363	NA	336	364	NA	346	346	NA	191	201	NA	173	175	NA	220	222	NA	156	168	NA
2022-PLATE-3_2022-102_16-0P_Fam2_R1_01	0 PSI	267	275	NA	124	148	NA	319	327	NA	NA	NA	NA	234	238	NA	140	144	NA	188	196	NA	103	115	NA	NA	NA	NA	365	365	NA	372	372	NA	346	360	NA	191	201	NA	175	175	NA	222	222	NA	154	168	NA
2022-PLATE-3_2022-102_17-0P_Fam2_R1_02	0 PSI	267	275	NA	148	152	NA	319	343	NA	224	224	NA	234	238	NA	NA	NA	NA	NA	NA	NA	NA	NA	NA	NA	NA	NA	365	365	NA	336	344	NA	346	360	NA	197	201	NA	173	175	NA	222	222	NA	154	154	168
2022-PLATE-3_2022-102_18-0P_Fam2_R1_03	0 PSI	275	283	NA	124	148	NA	343	343	NA	NA	NA	NA	238	242	NA	140	144	NA	196	200	NA	115	115	NA	193	197	NA	363	365	NA	372	372	NA	346	360	NA	191	201	NA	173	175	NA	222	222	NA	154	168	NA
2022-PLATE-3_2022-102_19-0P_Fam2_R1_04	0 PSI	275	283	NA	124	148	NA	343	343	NA	224	224	NA	238	242	NA	140	140	NA	196	200	NA	115	115	NA	187	193	NA	359	363	NA	336	372	NA	346	360	NA	197	201	NA	173	175	NA	220	222	NA	154	156	NA
2022-PLATE-3_2022-102_2-0P_Fam1_R1_02	0 PSI	267	275	NA	124	148	NA	343	343	NA	NA	NA	NA	222	234	NA	NA	NA	NA	196	200	NA	NA	NA	NA	NA	NA	NA	363	365	NA	336	364	NA	346	360	NA	197	201	NA	173	175	NA	220	222	NA	168	168	NA
2022-PLATE-3_2022-102_20-0P_Fam2_R1_05	0 PSI	275	283	NA	152	164	NA	327	343	NA	NA	NA	NA	238	242	NA	140	140	NA	196	200	NA	NA	NA	NA	NA	NA	NA	365	365	NA	372	372	NA	352	360	NA	197	201	NA	173	175	NA	222	222	NA	154	156	NA
2022-PLATE-3_2022-102_21-0P_Fam2_R1_06	0 PSI	275	283	NA	124	148	NA	327	343	NA	NA	NA	NA	206	234	NA	140	140	NA	188	208	NA	115	115	NA	187	197	NA	365	365	NA	344	372	NA	352	360	NA	197	197	NA	173	175	NA	222	222	NA	154	168	NA
2022-PLATE-3_2022-102_22-0P_Fam2_R1_07	0 PSI	275	283	NA	148	152	152	327	343	NA	224	224	NA	NA	NA	NA	140	140	NA	196	200	NA	103	103	NA	187	193	NA	359	363	NA	336	344	NA	346	360	NA	197	201	NA	173	175	NA	222	222	NA	154	168	NA
2022-PLATE-3_2022-102_23-0P_Fam2_R1_08	0 PSI	275	283	NA	148	152	NA	327	343	NA	NA	NA	NA	206	242	NA	140	144	NA	200	208	NA	103	115	NA	187	187	NA	365	365	NA	336	344	NA	352	360	NA	191	197	NA	175	175	NA	220	222	NA	NA	NA	NA
2022-PLATE-3_2022-102_24-0P_Fam2_R1_09	0 PSI	267	275	NA	124	148	NA	319	343	NA	NA	NA	NA	206	242	NA	140	144	NA	188	196	NA	103	115	NA	187	193	NA	359	363	NA	336	344	NA	346	360	NA	191	197	NA	173	175	NA	222	222	NA	154	156	NA
2022-PLATE-3_2022-102_25-0P_Fam2_R1_10	0 PSI	275	283	NA	124	148	NA	319	343	NA	224	224	NA	NA	NA	NA	140	144	NA	188	196	NA	115	115	NA	NA	NA	NA	365	365	NA	344	372	NA	NA	NA	NA	191	197	NA	NA	NA	NA	NA	NA	NA	154	168	168
2022-PLATE-3_2022-102_26-0P_Fam2_R1_11	0 PSI	267	275	NA	148	152	NA	343	343	NA	NA	NA	NA	238	242	NA	140	144	NA	188	208	NA	103	115	NA	187	187	NA	359	365	NA	336	344	NA	352	360	NA	191	197	NA	173	173	NA	222	222	NA	154	168	NA
2022-PLATE-3_2022-102_27-0P_Fam2_R1_12	0 PSI	NA	NA	NA	NA	NA	NA	NA	NA	NA	NA	NA	NA	NA	NA	NA	NA	NA	NA	NA	NA	NA	NA	NA	NA	NA	NA	NA	NA	NA	NA	NA	NA	NA	NA	NA	NA	NA	NA	NA	NA	NA	NA	NA	NA	NA	NA	NA	NA
2022-PLATE-3_2022-102_28-0P_Fam2_R1_13	0 PSI	275	283	NA	124	164	NA	319	327	NA	NA	NA	NA	206	242	NA	140	144	NA	188	208	NA	103	115	NA	193	197	NA	359	363	NA	344	372	NA	352	360	NA	191	197	NA	175	175	NA	222	222	NA	154	156	NA
2022-PLATE-3_2022-102_29-0P_Fam2_R1_14	0 PSI	267	275	275	NA	NA	NA	319	323	NA	NA	NA	NA	NA	NA	NA	NA	NA	NA	NA	NA	NA	NA	NA	NA	NA	NA	NA	NA	NA	NA	NA	NA	NA	NA	NA	NA	NA	NA	NA	NA	NA	NA	NA	NA	NA	NA	NA	NA
2022-PLATE-3_2022-102_3-0P_Fam1_R1_03	0 PSI	267	275	NA	124	164	NA	319	343	NA	NA	NA	NA	222	242	NA	140	144	NA	200	208	NA	NA	NA	NA	NA	NA	NA	359	363	NA	372	372	NA	346	346	NA	191	191	NA	173	175	NA	222	226	NA	156	168	NA
2022-PLATE-3_2022-102_30-0P_Fam2_R1_15	0 PSI	267	275	NA	124	164	NA	319	343	NA	NA	NA	NA	206	242	NA	140	140	NA	196	200	NA	115	115	NA	NA	NA	NA	359	365	NA	336	372	NA	360	360	NA	197	201	NA	173	175	NA	222	222	NA	154	168	NA
2022-PLATE-3_2022-102_31-0P_Fam3_R1_01	0 PSI	267	275	NA	124	148	NA	315	319	NA	NA	NA	NA	234	238	NA	NA	NA	NA	196	224	NA	103	115	NA	187	195	NA	359	359	NA	336	352	NA	352	360	NA	197	197	NA	173	173	NA	220	222	NA	156	168	NA
2022-PLATE-3_2022-102_32-0P_Fam3_R1_02	0 PSI	267	275	NA	148	152	NA	315	319	NA	224	244	NA	238	242	NA	140	140	NA	196	224	NA	115	115	NA	187	195	NA	359	359	NA	336	352	NA	346	346	NA	197	201	NA	173	175	NA	220	222	NA	156	156	NA
2022-PLATE-3_2022-102_33-0P_Fam3_R1_03	0 PSI	267	275	NA	NA	NA	NA	339	339	343	224	244	NA	NA	NA	NA	NA	NA	NA	NA	NA	NA	NA	NA	NA	NA	NA	NA	NA	NA	NA	336	352	352	NA	NA	NA	NA	NA	NA	NA	NA	NA	NA	NA	NA	156	156	NA
2022-PLATE-3_2022-102_34-0P_Fam3_R1_04	0 PSI	267	275	NA	124	164	NA	315	319	NA	NA	NA	NA	234	246	NA	140	144	NA	NA	NA	NA	NA	NA	NA	NA	NA	NA	359	359	NA	336	352	NA	346	352	NA	NA	NA	NA	173	175	NA	220	222	NA	156	156	NA
2022-PLATE-3_2022-102_35-0P_Fam3_R1_05	0 PSI	275	283	NA	148	152	NA	339	343	NA	NA	NA	NA	234	246	NA	140	144	NA	192	196	NA	115	115	NA	187	193	NA	359	359	NA	336	352	NA	346	352	NA	191	201	NA	173	173	NA	220	222	NA	156	156	NA
2022-PLATE-3_2022-102_36-0P_Fam3_R1_06	0 PSI	275	283	NA	NA	NA	NA	319	339	NA	224	244	NA	NA	NA	NA	140	144	NA	196	224	NA	103	115	NA	187	193	NA	359	365	NA	336	352	NA	346	346	NA	191	197	NA	173	175	NA	220	222	NA	156	168	NA
2022-PLATE-3_2022-102_37-0P_Fam3_R1_07	0 PSI	267	275	NA	NA	NA	NA	319	339	NA	224	244	NA	NA	NA	NA	140	144	144	NA	NA	NA	NA	NA	NA	NA	NA	NA	NA	NA	NA	352	372	NA	NA	NA	NA	191	197	NA	NA	NA	NA	220	222	NA	156	168	NA
2022-PLATE-3_2022-102_38-0P_Fam3_R1_08	0 PSI	267	275	NA	124	164	NA	319	339	NA	NA	NA	NA	234	238	NA	140	140	NA	196	224	NA	NA	NA	NA	NA	NA	NA	359	359	NA	336	344	NA	346	346	NA	197	201	NA	173	175	NA	220	222	NA	156	156	NA
2022-PLATE-3_2022-102_39-0P_Fam3_R1_09	0 PSI	275	283	NA	124	148	NA	339	343	NA	NA	NA	NA	234	238	NA	140	144	NA	192	196	NA	103	115	NA	NA	NA	NA	359	365	NA	344	372	NA	346	360	NA	191	197	NA	173	173	NA	220	222	NA	156	168	NA
2022-PLATE-3_2022-102_4-0P_Fam1_R1_04	0 PSI	267	275	NA	124	148	NA	319	343	NA	224	249	NA	222	242	NA	140	144	NA	200	208	NA	NA	NA	NA	NA	NA	NA	359	359	NA	336	364	NA	346	360	NA	191	201	NA	173	175	NA	222	226	NA	168	168	NA
2022-PLATE-3_2022-102_40-0P_Fam3_R1_10	0 PSI	267	275	NA	124	148	NA	319	339	NA	224	244	NA	238	242	NA	140	144	NA	208	224	NA	115	115	NA	187	193	NA	359	359	NA	336	344	NA	346	360	NA	191	197	NA	173	175	NA	220	222	NA	156	156	NA
2022-PLATE-3_2022-102_41-0P_Fam3_R1_11	0 PSI	275	283	NA	148	152	NA	319	339	NA	NA	NA	NA	234	238	NA	140	140	NA	192	208	NA	115	115	NA	193	197	NA	359	359	NA	344	372	NA	352	360	NA	197	201	NA	173	175	NA	220	222	NA	156	168	NA
2022-PLATE-3_2022-102_42-0P_Fam3_R1_12	0 PSI	275	283	NA	152	164	NA	339	343	NA	224	244	NA	242	246	NA	140	144	NA	192	208	NA	115	115	NA	187	193	NA	359	359	NA	336	352	NA	346	346	NA	191	201	NA	173	173	NA	220	222	NA	156	156	NA
2022-PLATE-3_2022-102_43-0P_Fam3_R1_13	0 PSI	267	275	NA	124	148	NA	315	343	NA	224	244	NA	238	242	NA	140	140	NA	192	196	NA	103	115	NA	195	197	NA	359	365	NA	352	372	NA	346	360	NA	197	197	NA	173	175	NA	220	222	NA	156	168	NA
2022-PLATE-3_2022-102_44-0P_Fam3_R1_14	0 PSI	275	283	NA	124	148	NA	315	319	NA	NA	NA	NA	242	246	NA	NA	NA	NA	208	224	NA	103	115	NA	187	195	NA	359	359	NA	336	352	NA	346	346	NA	197	197	NA	173	173	NA	220	222	NA	156	168	NA
2022-PLATE-3_2022-102_45-0P_Fam3_R1_15	0 PSI	275	283	NA	124	148	NA	319	339	NA	NA	NA	NA	242	246	NA	140	144	NA	192	208	NA	103	115	NA	187	195	NA	359	359	NA	336	344	NA	346	352	NA	191	197	NA	173	175	NA	220	222	NA	156	156	NA
2022-PLATE-3_2022-102_46-0P_Fam1_R2_01	0 PSI	267	275	NA	148	152	NA	343	343	NA	224	249	NA	222	234	NA	140	144	NA	196	200	NA	103	115	NA	187	195	NA	359	365	NA	336	372	NA	346	346	NA	191	201	NA	173	175	NA	222	226	NA	154	168	NA
2022-PLATE-3_2022-102_47-0P_Fam1_R2_02	0 PSI	275	283	NA	152	164	NA	319	343	NA	NA	NA	NA	234	234	NA	140	144	NA	196	200	NA	103	115	NA	195	197	NA	359	359	NA	372	372	NA	346	346	NA	191	201	NA	173	173	NA	220	222	NA	154	168	NA
2022-PLATE-3_2022-102_48-0P_Fam1_R2_03	0 PSI	279	283	NA	124	148	NA	319	343	NA	224	249	NA	234	242	NA	140	140	NA	200	208	NA	115	115	NA	197	197	NA	363	365	NA	364	372	NA	346	360	NA	197	201	NA	173	175	NA	222	226	NA	156	168	NA
2022-PLATE-3_2022-102_49-0P_Fam1_R2_04	0 PSI	267	279	NA	124	164	NA	319	343	NA	NA	NA	NA	222	242	NA	140	144	NA	196	200	NA	103	115	NA	187	197	NA	359	363	NA	336	364	NA	346	346	NA	191	191	NA	173	173	NA	222	226	NA	168	168	NA
2022-PLATE-3_2022-102_5-0P_Fam1_R1_05	0 PSI	279	283	NA	124	164	NA	319	343	NA	224	249	NA	234	234	NA	140	140	NA	196	200	NA	103	115	NA	187	195	NA	359	359	NA	336	372	NA	346	360	NA	197	201	NA	173	175	NA	222	226	NA	154	156	NA
2022-PLATE-3_2022-102_50-0P_Fam1_R2_05	0 PSI	267	283	NA	148	152	NA	319	343	NA	NA	NA	NA	234	234	NA	140	144	NA	196	200	NA	NA	NA	NA	NA	NA	NA	359	359	NA	NA	NA	NA	346	360	NA	191	201	NA	173	175	NA	222	226	NA	154	156	NA
2022-PLATE-3_2022-102_51-0P_Fam1_R2_06	0 PSI	267	279	NA	148	152	NA	343	343	NA	224	244	NA	222	234	NA	140	140	NA	196	200	NA	115	115	NA	187	195	NA	359	359	NA	336	364	NA	346	360	NA	191	197	NA	173	173	NA	222	226	NA	154	156	NA
2022-PLATE-3_2022-102_52-0P_Fam1_R2_07	0 PSI	275	283	NA	124	164	NA	319	343	NA	224	249	NA	234	242	NA	140	140	NA	196	200	NA	103	115	NA	187	197	NA	359	365	NA	336	364	NA	346	346	NA	197	201	NA	173	175	NA	220	222	NA	156	168	NA
2022-PLATE-3_2022-102_53-0P_Fam1_R2_08	0 PSI	275	283	NA	152	164	NA	319	343	NA	NA	NA	NA	222	242	NA	140	144	NA	200	208	NA	115	115	NA	187	195	NA	359	359	NA	336	364	NA	346	360	NA	191	191	NA	173	175	NA	220	222	NA	154	156	NA
2022-PLATE-3_2022-102_54-0P_Fam1_R2_09	0 PSI	275	283	NA	124	148	NA	319	343	NA	NA	NA	NA	222	234	NA	140	140	NA	196	200	NA	115	115	NA	NA	NA	NA	359	363	NA	372	372	NA	346	346	NA	191	197	NA	173	175	NA	220	222	NA	156	156	168
2022-PLATE-3_2022-102_55-0P_Fam1_R2_10	0 PSI	267	279	NA	152	164	NA	319	343	NA	NA	NA	NA	234	234	NA	140	144	NA	196	200	NA	NA	NA	NA	NA	NA	NA	363	365	NA	336	372	NA	346	360	NA	191	191	NA	173	173	NA	220	222	NA	154	168	NA
2022-PLATE-3_2022-102_56-0P_Fam1_R2_11	0 PSI	NA	NA	NA	NA	NA	NA	NA	NA	NA	NA	NA	NA	NA	NA	NA	NA	NA	NA	NA	NA	NA	NA	NA	NA	NA	NA	NA	NA	NA	NA	NA	NA	NA	NA	NA	NA	NA	NA	NA	NA	NA	NA	NA	NA	NA	NA	NA	NA
2022-PLATE-3_2022-102_57-0P_Fam1_R2_12	0 PSI	267	275	NA	152	164	NA	343	343	NA	NA	NA	NA	222	242	NA	140	144	NA	200	208	NA	NA	NA	NA	NA	NA	NA	363	365	NA	372	372	NA	346	346	NA	191	201	NA	173	175	NA	220	222	NA	154	156	NA
2022-PLATE-3_2022-102_58-0P_Fam1_R2_13	0 PSI	275	283	NA	124	164	NA	319	343	NA	NA	NA	NA	234	242	NA	140	140	NA	196	200	NA	115	115	NA	187	197	NA	363	365	NA	336	364	NA	346	360	NA	197	201	NA	173	175	NA	222	226	NA	168	168	NA
2022-PLATE-3_2022-102_59-0P_Fam1_R2_14	0 PSI	275	283	NA	NA	NA	NA	343	343	NA	224	244	NA	NA	NA	NA	140	140	NA	200	208	NA	103	115	NA	195	197	NA	359	365	NA	372	372	NA	346	360	NA	191	197	NA	173	173	NA	220	222	NA	154	168	NA
2022-PLATE-3_2022-102_6-0P_Fam1_R1_06	0 PSI	275	283	NA	148	152	NA	343	343	NA	224	244	NA	222	234	NA	140	144	NA	196	200	NA	115	115	NA	187	195	NA	359	359	NA	336	372	NA	346	360	NA	191	201	NA	173	175	NA	220	222	NA	154	168	NA
2022-PLATE-3_2022-102_60-0P_Fam1_R2_15	0 PSI	279	283	NA	152	164	NA	343	343	NA	224	244	NA	234	234	NA	140	144	NA	200	208	NA	115	115	NA	187	197	NA	363	365	NA	336	364	NA	346	346	NA	191	201	NA	173	175	NA	222	226	NA	154	168	NA
2022-PLATE-3_2022-102_61-0P_Fam2_R2_01	0 PSI	275	283	NA	124	164	NA	319	343	NA	NA	NA	NA	206	234	NA	140	140	NA	188	196	NA	NA	NA	NA	187	197	NA	365	365	NA	372	372	NA	346	352	NA	197	197	NA	175	175	NA	220	222	NA	154	168	NA
2022-PLATE-3_2022-102_62-0P_Fam2_R2_02	0 PSI	275	283	NA	152	164	NA	327	343	NA	NA	NA	NA	206	242	NA	140	144	NA	188	196	NA	NA	NA	NA	193	197	NA	363	365	NA	344	372	NA	346	360	NA	191	201	NA	173	173	NA	222	222	NA	154	156	NA
2022-PLATE-3_2022-102_63-0P_Fam2_R2_03	0 PSI	267	275	NA	152	164	NA	327	343	NA	224	224	NA	206	234	NA	NA	NA	NA	196	200	NA	103	115	NA	187	193	NA	359	363	NA	336	344	NA	360	360	NA	197	197	NA	173	173	NA	220	222	NA	154	168	NA
2022-PLATE-3_2022-102_64-0P_Fam2_R2_04	0 PSI	267	275	279	124	164	NA	343	343	NA	NA	NA	NA	NA	NA	NA	NA	NA	NA	188	208	NA	103	115	NA	187	197	NA	365	365	NA	372	372	NA	346	352	NA	191	201	NA	NA	NA	NA	222	222	NA	154	156	NA
2022-PLATE-3_2022-102_65-0P_Fam2_R2_05	0 PSI	275	283	NA	124	164	NA	319	327	NA	224	224	NA	234	238	NA	140	144	NA	200	208	NA	103	115	NA	NA	NA	NA	359	365	NA	NA	NA	NA	346	352	NA	191	201	NA	173	175	NA	220	222	NA	154	168	NA
2022-PLATE-3_2022-102_66-0P_Fam2_R2_06	0 PSI	267	275	NA	124	164	NA	319	343	NA	224	224	NA	206	234	NA	140	144	NA	200	208	NA	115	115	NA	187	193	NA	359	363	NA	336	344	NA	346	352	NA	191	197	NA	173	173	NA	222	222	NA	154	156	NA
2022-PLATE-3_2022-102_67-0P_Fam2_R2_07	0 PSI	267	275	NA	124	164	NA	319	343	NA	NA	NA	NA	206	242	NA	140	144	NA	200	208	NA	103	115	NA	187	187	NA	359	365	NA	336	372	NA	346	352	NA	191	197	NA	175	175	NA	220	222	NA	154	156	NA
2022-PLATE-3_2022-102_68-0P_Fam2_R2_08	0 PSI	267	275	NA	148	152	NA	327	343	NA	NA	NA	NA	234	238	NA	140	144	NA	188	196	NA	NA	NA	NA	NA	NA	NA	363	365	NA	372	372	NA	346	360	NA	191	201	NA	173	173	NA	222	222	NA	154	154	168
2022-PLATE-3_2022-102_69-0P_Fam2_R2_09	0 PSI	275	283	NA	148	152	NA	343	343	NA	NA	NA	NA	206	242	NA	140	140	NA	200	208	NA	NA	NA	NA	NA	NA	NA	359	365	NA	336	344	NA	346	360	NA	197	201	NA	173	175	NA	220	222	NA	154	156	NA
2022-PLATE-3_2022-102_7-0P_Fam1_R1_07	0 PSI	267	279	NA	124	164	NA	343	343	NA	224	249	NA	234	234	NA	140	140	NA	196	200	NA	103	115	NA	195	197	NA	359	365	NA	372	372	NA	346	346	NA	197	201	NA	173	175	NA	222	226	NA	154	168	NA
2022-PLATE-3_2022-102_70-0P_Fam2_R2_10	0 PSI	275	283	NA	124	148	NA	327	343	NA	NA	NA	NA	238	242	NA	140	144	NA	188	196	NA	103	115	NA	187	193	NA	359	363	NA	336	344	NA	346	352	NA	191	201	NA	175	175	NA	222	222	NA	154	156	NA
2022-PLATE-3_2022-102_71-0P_Fam2_R2_11	0 PSI	267	275	NA	148	152	NA	343	343	NA	NA	NA	NA	206	242	NA	140	144	NA	200	208	NA	103	103	NA	187	197	NA	365	365	NA	372	372	NA	360	360	NA	191	201	NA	173	175	NA	222	222	NA	154	156	NA
2022-PLATE-3_2022-102_72-0P_Fam2_R2_12	0 PSI	275	283	NA	124	164	NA	NA	NA	NA	NA	NA	NA	NA	NA	NA	NA	NA	NA	188	208	NA	103	115	NA	187	187	NA	365	365	NA	336	344	NA	NA	NA	NA	191	201	NA	NA	NA	NA	222	222	NA	154	168	168
2022-PLATE-3_2022-102_73-0P_Fam2_R2_13	0 PSI	275	283	NA	152	164	NA	319	327	NA	NA	NA	NA	234	238	NA	140	140	NA	196	200	NA	103	103	NA	193	197	NA	363	365	NA	344	372	NA	352	360	NA	197	201	NA	173	175	NA	222	222	NA	154	156	NA
2022-PLATE-3_2022-102_74-0P_Fam2_R2_14	0 PSI	267	275	NA	152	164	NA	319	343	NA	NA	NA	NA	234	238	NA	NA	NA	NA	196	200	NA	103	115	NA	NA	NA	NA	359	363	NA	336	344	NA	346	360	NA	197	201	NA	173	175	NA	220	222	NA	154	156	NA
2022-PLATE-3_2022-102_75-0P_Fam2_R2_15	0 PSI	275	283	NA	148	152	NA	343	343	NA	224	224	NA	206	242	NA	NA	NA	NA	188	208	208	NA	NA	NA	NA	NA	NA	359	363	NA	372	372	NA	352	360	NA	191	201	NA	173	173	NA	220	222	NA	NA	NA	NA
2022-PLATE-3_2022-102_76-0P_Fam3_R2_01	0 PSI	275	283	NA	NA	NA	NA	319	339	NA	NA	NA	NA	NA	NA	NA	140	140	NA	192	208	NA	103	115	NA	187	193	NA	359	365	NA	336	344	NA	NA	NA	NA	197	201	NA	NA	NA	NA	220	222	NA	156	168	168
2022-PLATE-3_2022-102_77-0P_Fam3_R2_02	0 PSI	275	283	NA	124	164	NA	339	343	NA	224	244	NA	NA	NA	NA	NA	NA	NA	NA	NA	NA	NA	NA	NA	NA	NA	NA	359	359	NA	336	352	352	346	360	NA	191	197	NA	NA	NA	NA	NA	NA	NA	156	168	NA
2022-PLATE-3_2022-102_78-0P_Fam3_R2_03	0 PSI	267	275	NA	124	164	NA	319	339	NA	NA	NA	NA	234	238	NA	140	144	NA	196	224	NA	NA	NA	NA	NA	NA	NA	359	365	NA	336	344	NA	346	346	NA	191	201	NA	173	173	NA	220	222	NA	156	168	NA
2022-PLATE-3_2022-102_79-0P_Fam3_R2_04	0 PSI	267	275	NA	124	148	NA	315	319	NA	NA	NA	NA	238	242	NA	140	144	NA	192	196	NA	NA	NA	NA	NA	NA	NA	359	365	NA	344	372	NA	346	346	NA	191	197	NA	173	173	NA	220	222	NA	156	156	NA
2022-PLATE-3_2022-102_8-0P_Fam1_R1_08	0 PSI	279	283	NA	124	164	NA	343	343	NA	224	244	NA	222	242	NA	140	140	NA	196	200	NA	103	115	NA	187	195	NA	359	365	NA	336	364	NA	346	346	NA	197	201	NA	173	173	NA	220	222	NA	154	156	NA
2022-PLATE-3_2022-102_80-0P_Fam3_R2_05	0 PSI	275	283	NA	152	164	NA	319	339	NA	224	244	NA	234	246	NA	140	140	NA	196	224	NA	103	115	NA	187	193	NA	359	359	NA	336	344	NA	352	360	NA	197	197	NA	173	175	NA	220	222	NA	156	156	NA
2022-PLATE-3_2022-102_81-0P_Fam3_R2_06	0 PSI	267	275	NA	148	152	NA	315	343	NA	224	244	NA	234	246	NA	140	144	NA	208	224	NA	103	115	NA	193	197	NA	359	365	NA	352	372	NA	352	360	NA	191	197	NA	173	173	NA	220	222	NA	156	168	NA
2022-PLATE-3_2022-102_82-0P_Fam3_R2_07	0 PSI	267	275	NA	148	152	NA	315	343	NA	NA	NA	NA	NA	NA	NA	NA	NA	NA	208	224	NA	NA	NA	NA	NA	NA	NA	359	359	NA	344	372	NA	346	352	NA	191	197	NA	173	173	NA	220	222	NA	156	156	168
2022-PLATE-3_2022-102_83-0P_Fam3_R2_08	0 PSI	275	283	NA	124	148	NA	315	343	NA	224	244	NA	234	246	NA	140	144	NA	196	224	NA	115	115	NA	195	197	NA	359	365	NA	352	372	NA	346	360	NA	191	201	NA	173	173	NA	220	222	NA	156	156	NA
2022-PLATE-3_2022-102_84-0P_Fam3_R2_09	0 PSI	275	283	NA	148	152	NA	339	343	NA	NA	NA	NA	234	238	NA	NA	NA	NA	196	224	NA	NA	NA	NA	NA	NA	NA	359	365	NA	344	372	NA	352	360	NA	197	197	NA	173	173	NA	220	222	NA	156	156	168
2022-PLATE-3_2022-102_85-0P_Fam3_R2_10	0 PSI	267	275	NA	152	164	NA	319	339	NA	224	244	NA	234	238	NA	140	140	NA	NA	NA	NA	NA	NA	NA	NA	NA	NA	359	359	NA	336	352	NA	346	360	NA	197	201	NA	173	173	NA	220	222	NA	156	168	NA
2022-PLATE-3_2022-102_86-0P_Fam3_R2_11	0 PSI	267	275	NA	124	164	NA	315	319	NA	NA	NA	NA	234	238	NA	140	140	NA	208	224	NA	NA	NA	NA	NA	NA	NA	359	359	NA	352	372	NA	352	360	NA	197	201	NA	173	175	NA	220	222	NA	156	168	NA
2022-PLATE-3_2022-102_87-0P_Fam3_R2_12	0 PSI	275	283	NA	148	152	NA	319	339	NA	NA	NA	NA	NA	NA	NA	NA	NA	NA	192	208	NA	103	115	NA	195	197	NA	359	359	NA	NA	NA	NA	NA	NA	NA	NA	NA	NA	NA	NA	NA	NA	NA	NA	156	156	NA
2022-PLATE-3_2022-102_88-0P_Fam3_R2_13	0 PSI	267	275	NA	124	148	NA	315	319	NA	NA	NA	NA	234	246	NA	NA	NA	NA	192	196	NA	115	115	NA	187	195	NA	359	365	NA	336	352	NA	352	360	NA	197	197	NA	173	175	NA	220	222	NA	156	156	NA
2022-PLATE-3_2022-102_89-0P_Fam3_R2_14	0 PSI	267	275	NA	124	148	NA	319	339	NA	NA	NA	NA	242	246	NA	140	144	NA	208	224	NA	115	115	NA	187	193	NA	359	359	NA	336	352	NA	346	352	NA	191	197	NA	173	175	NA	220	222	NA	156	156	NA
2022-PLATE-3_2022-102_9-0P_Fam1_R1_09	0 PSI	279	283	NA	148	152	NA	343	343	NA	224	244	NA	234	234	NA	140	140	NA	200	208	NA	NA	NA	NA	NA	NA	NA	359	365	NA	336	372	NA	346	360	NA	191	197	NA	173	173	NA	222	226	NA	168	168	NA
2022-PLATE-3_2022-102_90-0P_Fam3_R2_15	0 PSI	NA	NA	NA	NA	NA	NA	NA	NA	NA	NA	NA	NA	234	246	NA	140	144	NA	196	224	NA	115	115	NA	193	197	NA	359	365	NA	NA	NA	NA	NA	NA	NA	191	197	NA	NA	NA	NA	NA	NA	NA	NA	NA	NA
2022-PLATE-3_2022-102_91-P1_Fam1_R1_01	6500 PSI	275	283	NA	148	152	NA	343	343	NA	NA	NA	NA	222	234	NA	140	140	NA	200	208	NA	NA	NA	NA	NA	NA	NA	363	365	NA	NA	NA	NA	346	360	NA	197	201	NA	173	175	NA	220	222	NA	154	154	168
2022-PLATE-3_2022-102_92-P1_Fam1_R1_02	6500 PSI	279	283	NA	152	164	NA	343	343	NA	NA	NA	NA	234	234	NA	140	144	NA	196	200	NA	103	115	NA	195	197	NA	359	359	NA	372	372	NA	346	346	NA	191	201	NA	173	175	NA	222	226	NA	168	168	NA
2022-PLATE-3_2022-102_93-P1_Fam1_R1_03	6500 PSI	279	283	NA	124	148	NA	343	343	NA	NA	NA	NA	222	234	NA	140	144	NA	196	200	NA	115	115	NA	187	197	NA	359	359	NA	336	364	NA	346	346	NA	191	201	NA	173	173	NA	222	226	NA	168	168	NA
2022-PLATE-3_2022-102_94-P1_Fam1_R1_04	6500 PSI	267	279	NA	152	164	NA	319	343	NA	NA	NA	NA	234	242	NA	NA	NA	NA	200	208	NA	103	115	NA	187	197	NA	359	363	NA	336	336	372	346	360	NA	191	197	NA	173	173	NA	222	226	NA	NA	NA	NA
2022-PLATE-9_2022-102_100-P1_Fam1_R1_10	6500 PSI	279	283	NA	148	152	NA	319	343	NA	NA	NA	NA	222	242	NA	140	144	NA	196	200	NA	115	115	NA	195	197	NA	359	365	NA	372	372	NA	346	346	NA	191	201	NA	173	173	NA	220	222	NA	168	168	NA
2022-PLATE-9_2022-102_101-P1_Fam1_R1_11	6500 PSI	279	283	NA	124	164	NA	343	343	NA	NA	NA	NA	234	234	NA	140	140	NA	196	200	NA	103	115	NA	195	197	NA	359	365	NA	372	372	NA	346	346	NA	191	197	NA	173	175	NA	220	222	NA	154	168	NA
2022-PLATE-9_2022-102_102-P1_Fam1_R1_12	6500 PSI	NA	NA	NA	NA	NA	NA	NA	NA	NA	224	249	NA	222	234	NA	140	144	NA	200	208	NA	115	115	NA	195	197	NA	359	365	NA	364	372	NA	346	360	NA	191	191	NA	173	175	NA	220	222	NA	154	156	NA
2022-PLATE-9_2022-102_103-P1_Fam1_R1_13	6500 PSI	267	275	NA	124	164	NA	319	343	NA	224	244	NA	222	242	NA	140	144	NA	200	208	NA	115	115	NA	187	195	NA	359	365	NA	336	364	NA	346	346	NA	191	191	NA	173	175	NA	222	226	NA	154	168	NA
2022-PLATE-9_2022-102_104-P1_Fam1_R1_14	6500 PSI	267	279	NA	124	164	NA	319	343	NA	NA	NA	NA	222	242	NA	140	140	NA	200	208	NA	115	115	NA	187	197	NA	359	363	NA	336	364	NA	346	360	NA	191	197	NA	173	175	NA	222	226	NA	156	168	NA
2022-PLATE-9_2022-102_105-P1_Fam1_R1_15	6500 PSI	279	283	NA	124	148	NA	343	343	NA	224	244	NA	234	234	NA	140	140	NA	196	200	NA	103	115	NA	187	197	NA	359	363	NA	336	364	NA	346	346	NA	197	201	NA	173	175	NA	222	226	NA	154	168	NA
2022-PLATE-9_2022-102_106-P1_Fam2_R1_01	6500 PSI	275	283	NA	124	148	NA	343	343	NA	224	224	NA	206	242	NA	140	144	NA	188	208	NA	103	115	NA	193	197	NA	363	365	NA	344	372	NA	352	360	NA	191	201	NA	175	175	NA	220	222	NA	154	168	NA
2022-PLATE-9_2022-102_107-P1_Fam2_R1_02	6500 PSI	267	275	NA	124	148	NA	343	343	NA	NA	NA	NA	206	234	NA	140	140	NA	188	208	NA	103	115	NA	187	187	NA	359	365	NA	336	372	NA	352	360	NA	197	197	NA	175	175	NA	222	222	NA	154	168	NA
2022-PLATE-9_2022-102_108-P1_Fam2_R1_03	6500 PSI	267	275	NA	148	152	NA	319	327	NA	NA	NA	NA	238	242	NA	140	144	NA	188	208	NA	103	115	NA	193	197	NA	363	365	NA	372	372	NA	352	360	NA	191	201	NA	173	173	NA	222	222	NA	154	156	NA
2022-PLATE-9_2022-102_109-P1_Fam2_R1_04	6500 PSI	275	283	NA	124	164	NA	319	343	NA	NA	NA	NA	234	238	NA	140	140	NA	196	200	NA	103	103	NA	187	187	NA	359	363	NA	336	372	NA	352	360	NA	197	201	NA	173	175	NA	220	222	NA	154	168	NA
2022-PLATE-9_2022-102_110-P1_Fam2_R1_05	6500 PSI	267	275	NA	152	164	NA	327	343	NA	224	224	NA	NA	NA	NA	140	140	NA	NA	NA	NA	NA	NA	NA	NA	NA	NA	365	365	NA	344	372	NA	346	360	NA	197	197	NA	173	175	NA	222	222	NA	154	156	NA
2022-PLATE-9_2022-102_111-P1_Fam2_R1_06	6500 PSI	275	283	NA	124	148	NA	343	343	NA	NA	NA	NA	234	238	NA	140	140	NA	188	196	NA	103	115	NA	193	197	NA	363	365	NA	344	372	NA	360	360	NA	197	201	NA	173	175	NA	222	222	NA	154	168	NA
2022-PLATE-9_2022-102_112-P1_Fam2_R1_07	6500 PSI	275	283	NA	124	164	NA	343	343	NA	NA	NA	NA	206	242	NA	140	144	NA	188	208	NA	103	115	NA	187	187	NA	359	363	NA	336	372	NA	346	352	NA	191	197	NA	173	175	NA	220	222	NA	154	168	NA
2022-PLATE-9_2022-102_113-P1_Fam2_R1_08	6500 PSI	275	283	NA	124	164	NA	319	327	NA	NA	NA	NA	206	242	NA	140	144	NA	196	200	NA	103	115	NA	187	197	NA	365	365	NA	372	372	NA	360	360	NA	191	197	NA	175	175	NA	222	222	NA	154	156	NA
2022-PLATE-9_2022-102_114-P1_Fam2_R1_09	6500 PSI	267	275	NA	148	152	NA	319	343	NA	224	224	NA	238	242	NA	140	144	NA	188	196	NA	103	115	NA	187	197	NA	365	365	NA	372	372	NA	360	360	NA	191	197	NA	175	175	NA	222	222	NA	154	154	168
2022-PLATE-9_2022-102_115-P1_Fam2_R1_10	6500 PSI	267	275	NA	124	164	NA	327	343	NA	NA	NA	NA	234	238	NA	140	144	NA	196	200	NA	115	115	NA	193	197	NA	363	365	NA	344	372	NA	360	360	NA	191	197	NA	173	175	NA	222	222	NA	154	156	NA
2022-PLATE-9_2022-102_116-P1_Fam2_R1_11	6500 PSI	267	275	NA	124	164	NA	327	343	NA	NA	NA	NA	206	234	NA	140	144	NA	188	208	NA	103	103	NA	187	187	NA	363	365	NA	336	372	NA	346	360	NA	191	201	NA	175	175	NA	220	222	NA	154	156	NA
2022-PLATE-9_2022-102_117-P1_Fam2_R1_12	6500 PSI	275	275	283	124	148	NA	343	343	NA	224	224	NA	234	238	NA	140	144	NA	188	208	NA	103	115	NA	187	193	193	363	363	365	336	344	344	346	360	NA	191	201	NA	173	173	NA	222	222	NA	154	168	NA
2022-PLATE-9_2022-102_118-P1_Fam2_R1_13	6500 PSI	275	283	NA	124	164	NA	327	343	NA	224	224	NA	NA	NA	NA	140	144	NA	188	208	NA	103	103	NA	187	187	NA	359	363	NA	336	372	NA	NA	NA	NA	191	197	NA	173	173	NA	222	222	NA	154	168	NA
2022-PLATE-9_2022-102_119-P1_Fam2_R1_14	6500 PSI	267	275	NA	NA	NA	NA	319	343	NA	224	224	NA	NA	NA	NA	140	144	NA	200	208	NA	103	115	NA	187	197	NA	359	363	NA	372	372	NA	360	360	NA	191	197	NA	173	173	NA	222	222	NA	154	168	NA
2022-PLATE-9_2022-102_120-P1_Fam2_R1_15	6500 PSI	267	275	NA	124	164	NA	319	343	NA	NA	NA	NA	238	242	NA	140	140	NA	188	208	NA	103	115	NA	187	193	NA	359	363	NA	336	372	NA	360	360	NA	197	201	NA	173	175	NA	222	222	NA	154	168	NA
2022-PLATE-9_2022-102_121-P1_Fam3_R1_01	6500 PSI	267	275	NA	124	148	NA	315	343	NA	224	244	NA	242	246	NA	140	144	NA	192	208	NA	103	115	NA	187	195	NA	359	359	NA	336	352	NA	346	352	NA	191	201	NA	173	173	NA	220	222	NA	156	156	NA
2022-PLATE-9_2022-102_122-P1_Fam3_R1_02	6500 PSI	275	275	283	148	152	164	315	319	339	224	244	244	238	242	246	140	140	NA	192	208	224	115	115	NA	193	195	197	359	359	NA	344	352	372	346	346	352	197	197	201	173	173	NA	220	220	222	156	156	168
2022-PLATE-9_2022-102_123-P1_Fam3_R1_03	6500 PSI	267	275	NA	124	148	NA	315	343	NA	224	244	NA	234	246	NA	140	144	NA	208	224	NA	103	115	NA	195	197	NA	359	365	NA	352	372	NA	352	360	NA	191	201	NA	173	175	NA	220	222	NA	156	168	NA
2022-PLATE-9_2022-102_124-P1_Fam3_R1_04	6500 PSI	275	283	NA	124	148	164	319	339	NA	224	244	244	234	238	NA	140	140	NA	196	224	NA	115	115	NA	195	195	197	359	359	365	344	352	372	346	346	NA	197	197	NA	173	175	NA	220	222	NA	156	156	NA
2022-PLATE-9_2022-102_125-P1_Fam3_R1_05	6500 PSI	275	283	NA	152	164	NA	319	339	NA	224	244	NA	234	238	NA	140	140	NA	192	196	NA	103	115	NA	193	197	NA	359	365	NA	344	372	NA	352	360	NA	197	201	NA	173	175	NA	220	222	NA	156	168	NA
2022-PLATE-9_2022-102_126-P1_Fam3_R1_06	6500 PSI	267	275	NA	124	148	NA	315	319	NA	224	244	NA	234	238	NA	140	140	NA	208	224	NA	115	115	NA	187	187	NA	365	365	NA	336	336	NA	352	360	NA	197	201	NA	173	173	NA	220	222	NA	156	156	NA
2022-PLATE-9_2022-102_127-P1_Fam3_R1_07	6500 PSI	267	275	NA	124	148	NA	315	343	NA	NA	NA	NA	242	246	NA	140	144	NA	208	224	NA	NA	NA	NA	NA	NA	NA	NA	NA	NA	336	344	352	352	360	NA	191	197	NA	173	175	NA	220	222	NA	156	168	NA
2022-PLATE-9_2022-102_128-P1_Fam3_R1_08	6500 PSI	267	275	NA	124	148	NA	315	343	NA	224	244	NA	242	246	NA	140	140	NA	208	224	NA	115	115	NA	195	197	NA	359	365	NA	352	372	NA	346	346	NA	197	197	NA	173	175	NA	220	222	NA	156	168	NA
2022-PLATE-9_2022-102_129-P1_Fam3_R1_09	6500 PSI	275	283	NA	124	164	NA	315	319	NA	224	244	NA	234	238	NA	140	140	NA	192	196	NA	115	115	NA	187	195	NA	359	359	NA	336	344	NA	352	360	NA	197	201	NA	173	175	NA	220	222	NA	156	156	NA
2022-PLATE-9_2022-102_130-P1_Fam3_R1_10	6500 PSI	275	283	NA	124	148	NA	319	339	NA	224	244	NA	238	242	NA	140	144	NA	192	208	224	115	115	NA	187	193	NA	359	365	NA	336	344	NA	346	346	NA	191	197	NA	173	173	NA	220	222	NA	156	156	NA
2022-PLATE-9_2022-102_131-P1_Fam3_R1_11	6500 PSI	267	275	275	148	152	164	315	339	343	224	244	244	238	242	246	NA	NA	NA	192	208	224	103	115	115	193	195	197	359	359	365	344	352	372	346	352	360	191	197	NA	173	173	175	220	220	222	156	156	NA
2022-PLATE-9_2022-102_132-P1_Fam3_R1_12	6500 PSI	267	275	NA	124	148	164	315	319	339	224	244	NA	238	242	246	140	140	NA	192	192	208	103	115	NA	193	195	197	359	359	365	344	352	372	352	360	NA	197	197	NA	173	173	NA	220	220	222	156	156	168
2022-PLATE-9_2022-102_133-P1_Fam3_R1_13	6500 PSI	267	275	NA	124	148	148	315	319	NA	224	244	244	238	242	246	140	140	NA	192	196	NA	115	115	NA	193	197	NA	359	365	NA	344	372	NA	346	346	NA	197	197	NA	173	173	NA	220	222	NA	156	156	168
2022-PLATE-9_2022-102_134-P1_Fam3_R1_14	6500 PSI	267	275	NA	124	164	NA	315	319	NA	224	244	NA	234	246	NA	140	144	NA	208	224	NA	103	115	NA	187	195	NA	359	359	NA	336	344	NA	346	352	NA	191	197	NA	173	173	NA	220	222	NA	156	156	NA
2022-PLATE-9_2022-102_135-P1_Fam3_R1_15	6500 PSI	275	283	NA	148	152	164	315	319	339	NA	NA	NA	234	238	246	140	140	NA	196	224	224	103	115	115	193	195	197	359	359	365	344	352	372	346	352	360	197	197	201	173	173	175	220	220	222	156	156	NA
2022-PLATE-9_2022-102_136-P1_Fam1_R2_01	6500 PSI	275	283	NA	152	164	NA	319	343	NA	224	244	NA	234	234	NA	140	144	NA	200	208	NA	103	115	NA	195	197	NA	359	365	NA	372	372	NA	346	346	NA	191	201	NA	173	173	NA	220	222	NA	154	156	NA
2022-PLATE-9_2022-102_137-P1_Fam1_R2_02	6500 PSI	267	275	NA	124	164	NA	343	343	NA	224	244	NA	222	242	NA	140	140	NA	196	200	NA	103	115	NA	187	197	NA	359	363	NA	336	364	NA	346	346	NA	191	197	NA	173	175	NA	220	222	NA	154	168	NA
2022-PLATE-9_2022-102_138-P1_Fam1_R2_03	6500 PSI	267	279	NA	148	152	NA	339	343	NA	224	249	NA	222	242	NA	140	140	NA	196	200	NA	103	115	NA	187	195	NA	359	359	NA	336	372	NA	346	346	NA	191	197	NA	173	173	NA	222	226	NA	156	168	NA
2022-PLATE-9_2022-102_139-P1_Fam1_R2_04	6500 PSI	267	279	NA	152	164	NA	319	343	NA	224	249	NA	222	234	NA	140	140	NA	200	208	NA	103	115	NA	187	195	NA	359	359	NA	336	364	NA	346	346	NA	197	201	NA	173	175	NA	220	222	NA	168	168	NA
2022-PLATE-9_2022-102_140-P1_Fam1_R2_05	6500 PSI	267	279	NA	152	164	NA	343	343	NA	224	244	NA	222	242	NA	140	144	NA	196	200	NA	103	115	NA	195	197	NA	359	365	NA	372	372	NA	346	346	NA	191	191	NA	173	173	NA	220	222	NA	168	168	NA
2022-PLATE-9_2022-102_141-P1_Fam1_R2_06	6500 PSI	267	279	NA	NA	NA	NA	319	343	NA	224	249	NA	234	234	NA	140	144	NA	196	200	NA	115	115	NA	197	197	NA	NA	NA	NA	364	372	NA	346	346	NA	191	201	NA	173	173	NA	220	222	NA	156	168	NA
2022-PLATE-9_2022-102_142-P1_Fam1_R2_07	6500 PSI	275	283	NA	152	164	NA	319	343	NA	224	249	NA	222	242	NA	140	144	NA	196	200	NA	103	115	NA	197	197	NA	363	365	NA	364	372	NA	346	346	NA	191	191	NA	173	175	NA	220	222	NA	168	168	NA
2022-PLATE-9_2022-102_143-P1_Fam1_R2_08	6500 PSI	279	283	NA	148	152	NA	319	343	NA	NA	NA	NA	234	234	NA	140	140	NA	196	200	NA	115	115	NA	195	197	NA	359	365	NA	372	372	NA	346	346	NA	191	197	NA	173	173	NA	220	222	NA	154	168	NA
2022-PLATE-9_2022-102_144-P1_Fam1_R2_09	6500 PSI	275	283	NA	124	164	NA	319	343	NA	NA	NA	NA	234	242	NA	140	144	NA	200	208	NA	115	115	NA	187	197	NA	359	363	NA	336	364	NA	346	346	NA	191	201	NA	173	175	NA	220	222	NA	168	168	NA
2022-PLATE-9_2022-102_145-P1_Fam1_R2_10	6500 PSI	275	283	283	148	152	NA	343	343	NA	224	244	NA	NA	NA	NA	140	144	NA	196	200	NA	115	115	NA	NA	NA	NA	359	359	NA	336	364	NA	346	346	NA	191	201	NA	NA	NA	NA	220	222	222	156	168	NA
2022-PLATE-9_2022-102_146-P1_Fam1_R2_11	6500 PSI	267	275	NA	124	164	NA	343	343	NA	224	249	NA	222	242	NA	140	144	NA	196	200	NA	103	115	NA	187	197	NA	359	363	NA	336	364	NA	346	360	NA	191	191	NA	173	175	NA	220	222	NA	154	168	NA
2022-PLATE-9_2022-102_147-P1_Fam1_R2_12	6500 PSI	275	283	NA	148	152	164	319	343	NA	224	244	NA	222	234	NA	140	144	NA	196	200	NA	103	115	115	197	197	NA	363	365	NA	364	372	NA	346	360	NA	191	201	NA	173	175	NA	220	222	NA	156	168	NA
2022-PLATE-9_2022-102_148-P1_Fam1_R2_13	6500 PSI	275	283	NA	124	164	NA	343	343	NA	224	249	NA	222	234	NA	140	144	NA	196	200	NA	115	115	NA	187	197	NA	359	363	NA	336	364	NA	346	346	NA	191	191	NA	173	175	NA	222	226	NA	156	168	NA
2022-PLATE-9_2022-102_149-P1_Fam1_R2_14	6500 PSI	267	279	NA	148	152	NA	319	343	NA	224	244	NA	234	242	NA	140	140	NA	200	208	NA	103	115	NA	197	197	NA	359	363	NA	364	372	NA	346	346	NA	191	197	NA	173	175	NA	222	226	NA	168	168	NA
2022-PLATE-9_2022-102_150-P1_Fam1_R2_15	6500 PSI	275	283	NA	152	164	NA	343	343	NA	224	249	NA	222	242	NA	140	144	NA	196	200	NA	115	115	NA	197	197	NA	363	365	NA	364	372	NA	346	346	NA	191	191	NA	173	175	NA	220	222	NA	154	156	NA
2022-PLATE-9_2022-102_151-P1_Fam2_R2_01	6500 PSI	267	275	NA	148	152	164	327	343	NA	NA	NA	NA	206	242	NA	140	140	NA	188	200	208	103	103	115	193	193	197	363	363	365	344	372	372	346	360	NA	197	197	NA	173	173	NA	222	222	NA	154	156	NA
2022-PLATE-9_2022-102_152-P1_Fam2_R2_02	6500 PSI	275	283	NA	148	152	NA	327	343	NA	NA	NA	NA	206	234	NA	140	140	NA	188	196	NA	103	115	NA	187	197	NA	359	365	NA	372	372	NA	346	360	NA	197	201	NA	173	175	NA	220	222	NA	154	156	NA
2022-PLATE-9_2022-102_153-P1_Fam2_R2_03	6500 PSI	267	275	NA	148	152	NA	319	327	NA	224	224	NA	206	242	NA	140	140	NA	196	200	NA	103	115	NA	193	197	NA	363	365	NA	344	372	NA	346	352	NA	197	201	NA	173	175	NA	220	222	NA	154	168	NA
2022-PLATE-9_2022-102_154-P1_Fam2_R2_04	6500 PSI	275	283	NA	152	164	NA	319	327	343	NA	NA	NA	206	234	NA	140	140	NA	188	208	NA	103	115	NA	187	197	NA	365	365	NA	372	372	NA	360	360	NA	197	201	NA	173	173	NA	220	222	NA	154	168	NA
2022-PLATE-9_2022-102_155-P1_Fam2_R2_05	6500 PSI	267	275	NA	124	148	NA	319	327	NA	NA	NA	NA	206	234	NA	140	140	NA	188	208	NA	103	115	NA	187	187	NA	359	365	NA	336	372	NA	360	360	NA	197	197	NA	173	175	NA	222	222	NA	154	168	NA
2022-PLATE-9_2022-102_156-P1_Fam2_R2_06	6500 PSI	267	275	NA	124	148	NA	319	327	NA	NA	NA	NA	206	234	NA	140	144	NA	188	208	NA	115	115	NA	187	187	NA	359	365	NA	336	372	NA	352	360	360	191	201	NA	173	173	NA	222	222	NA	154	154	168
2022-PLATE-9_2022-102_157-P1_Fam2_R2_07	6500 PSI	267	275	NA	148	152	NA	319	327	NA	NA	NA	NA	234	238	NA	140	144	NA	188	208	NA	103	103	NA	187	193	NA	363	365	NA	336	372	NA	360	360	NA	191	201	NA	173	173	NA	222	222	NA	154	156	NA
2022-PLATE-9_2022-102_158-P1_Fam2_R2_08	6500 PSI	267	275	NA	148	148	152	327	343	NA	224	224	NA	238	242	NA	140	140	NA	188	196	NA	103	103	NA	193	197	NA	363	365	NA	344	372	NA	346	352	NA	197	197	NA	175	175	NA	222	222	NA	154	168	NA
2022-PLATE-9_2022-102_159-P1_Fam2_R2_09	6500 PSI	275	283	NA	152	164	NA	319	343	NA	NA	NA	NA	206	242	NA	140	140	NA	188	196	NA	103	115	NA	187	193	193	359	363	365	336	344	344	346	352	NA	197	201	NA	173	173	NA	220	222	NA	154	156	NA
2022-PLATE-9_2022-102_160-P1_Fam2_R2_10	6500 PSI	275	283	NA	152	164	NA	327	343	NA	NA	NA	NA	234	238	NA	140	144	NA	188	208	NA	103	115	NA	187	197	NA	365	365	NA	344	372	NA	352	360	NA	191	201	NA	173	175	NA	220	222	NA	154	156	NA
2022-PLATE-9_2022-102_161-P1_Fam2_R2_11	6500 PSI	275	283	NA	152	164	NA	343	343	NA	NA	NA	NA	238	242	NA	140	144	NA	188	208	NA	103	103	115	187	197	NA	365	365	NA	372	372	NA	346	352	NA	191	197	NA	173	175	NA	220	222	NA	154	168	NA
2022-PLATE-9_2022-102_162-P1_Fam2_R2_12	6500 PSI	267	275	NA	148	152	NA	319	327	NA	NA	NA	NA	234	238	NA	140	144	NA	188	200	208	103	115	NA	187	187	NA	365	365	NA	336	344	NA	352	360	NA	191	197	NA	173	175	NA	220	220	222	154	156	NA
2022-PLATE-9_2022-102_163-P1_Fam2_R2_13	6500 PSI	267	275	NA	124	164	NA	343	343	NA	224	224	NA	206	242	NA	140	140	NA	188	208	NA	115	115	NA	187	187	NA	359	359	NA	336	336	NA	346	360	NA	197	197	NA	175	175	NA	220	222	222	154	168	NA
2022-PLATE-9_2022-102_164-P1_Fam2_R2_14	6500 PSI	267	275	NA	NA	NA	NA	319	343	NA	224	224	NA	NA	NA	NA	140	144	NA	188	208	NA	103	115	NA	193	193	197	363	363	365	344	372	372	346	360	NA	191	197	NA	173	173	NA	220	222	NA	154	156	156
2022-PLATE-9_2022-102_165-P1_Fam2_R2_15	6500 PSI	267	275	NA	152	164	NA	NA	NA	NA	224	224	NA	NA	NA	NA	140	144	NA	188	196	196	103	115	115	187	193	NA	359	363	NA	336	344	NA	NA	NA	NA	191	197	NA	173	175	NA	222	222	NA	154	156	NA
2022-PLATE-9_2022-102_166-P1_Fam3_R2_01	6500 PSI	275	275	283	124	148	164	315	319	339	224	244	244	NA	NA	NA	140	140	NA	192	196	NA	115	115	NA	187	193	195	359	359	365	336	344	352	346	352	360	197	197	201	173	173	175	220	220	222	156	156	NA
2022-PLATE-9_2022-102_167-P1_Fam3_R2_02	6500 PSI	267	275	NA	148	152	NA	NA	NA	NA	224	244	NA	NA	NA	NA	140	140	NA	192	196	NA	NA	NA	NA	195	195	197	359	359	365	344	352	372	346	360	NA	197	201	NA	173	175	NA	220	222	NA	156	156	NA
2022-PLATE-9_2022-102_168-P1_Fam3_R2_03	6500 PSI	NA	NA	NA	NA	NA	NA	NA	NA	NA	NA	NA	NA	NA	NA	NA	NA	NA	NA	NA	NA	NA	NA	NA	NA	NA	NA	NA	NA	NA	NA	NA	NA	NA	NA	NA	NA	NA	NA	NA	NA	NA	NA	NA	NA	NA	NA	NA	NA
2022-PLATE-9_2022-102_169-P1_Fam3_R2_04	6500 PSI	275	275	283	124	164	NA	315	319	NA	224	244	NA	234	238	NA	140	140	NA	192	208	NA	103	115	NA	187	195	NA	359	359	NA	336	352	NA	346	360	NA	197	197	NA	173	175	NA	220	222	NA	156	156	NA
2022-PLATE-9_2022-102_170-P1_Fam3_R2_05	6500 PSI	267	275	NA	148	152	164	315	319	NA	224	244	NA	238	242	246	140	140	NA	208	224	NA	115	115	NA	195	197	NA	359	365	NA	352	372	NA	346	346	NA	197	197	NA	173	175	NA	220	222	NA	156	156	NA
2022-PLATE-9_2022-102_171-P1_Fam3_R2_06	6500 PSI	275	275	283	124	164	164	315	319	339	224	244	244	234	238	246	140	140	NA	208	224	224	103	115	115	195	195	197	359	359	365	344	352	372	346	346	352	197	197	201	173	173	175	220	220	222	156	156	NA
2022-PLATE-9_2022-102_172-P1_Fam3_R2_07	6500 PSI	275	283	NA	124	148	NA	315	319	NA	224	244	NA	234	246	NA	140	144	NA	192	208	NA	103	115	NA	187	195	NA	359	359	NA	336	352	NA	352	360	NA	191	201	NA	173	175	NA	220	222	NA	156	156	NA
2022-PLATE-9_2022-102_173-P1_Fam3_R2_08	6500 PSI	267	275	275	148	152	164	315	343	NA	224	244	NA	238	242	NA	140	144	NA	192	208	NA	115	115	NA	195	197	NA	359	365	NA	352	372	NA	346	346	NA	191	201	NA	173	175	NA	220	222	NA	156	168	NA
2022-PLATE-9_2022-102_174-P1_Fam3_R2_09	6500 PSI	267	275	275	148	152	164	315	319	339	NA	NA	NA	234	238	246	140	140	NA	192	208	224	103	115	115	193	195	197	359	359	NA	344	352	372	346	352	360	197	197	201	173	173	NA	220	220	222	156	156	NA
2022-PLATE-9_2022-102_175-P1_Fam3_R2_10	6500 PSI	267	275	275	124	148	164	315	315	319	224	244	244	238	242	246	140	140	NA	192	196	224	115	115	NA	187	193	195	359	359	NA	336	344	352	346	352	360	197	201	201	173	173	175	220	220	222	156	156	NA
2022-PLATE-9_2022-102_176-P1_Fam3_R2_11	6500 PSI	275	283	NA	152	164	NA	319	339	NA	224	244	NA	238	242	NA	140	140	NA	192	208	NA	115	115	NA	195	197	NA	359	359	NA	352	372	NA	352	360	NA	197	197	NA	173	175	NA	220	222	NA	156	168	NA
2022-PLATE-9_2022-102_177-P1_Fam3_R2_12	6500 PSI	275	283	NA	124	148	164	315	343	NA	NA	NA	NA	234	246	NA	140	144	NA	192	208	224	115	115	NA	187	193	195	359	359	NA	336	344	352	352	360	NA	191	201	NA	173	173	NA	220	222	NA	156	156	NA
2022-PLATE-9_2022-102_178-P1_Fam3_R2_13	6500 PSI	267	275	NA	152	164	NA	315	343	NA	224	244	NA	238	242	NA	140	140	NA	196	224	NA	103	115	NA	187	195	NA	359	359	NA	336	352	NA	346	352	NA	197	197	NA	173	175	NA	220	220	222	156	168	NA
2022-PLATE-9_2022-102_179-P1_Fam3_R2_14	6500 PSI	267	275	275	148	152	164	315	339	343	NA	NA	NA	238	242	246	140	140	NA	192	208	224	103	115	115	187	193	195	359	359	NA	336	344	352	346	352	360	197	197	201	173	173	175	220	220	222	156	156	168
2022-PLATE-9_2022-102_180-P1_Fam3_R2_15	6500 PSI	267	275	NA	148	152	NA	319	339	NA	224	244	244	238	242	NA	140	140	NA	208	224	NA	115	115	NA	187	193	NA	359	359	NA	336	344	NA	346	346	NA	197	197	NA	173	173	NA	220	222	NA	156	168	NA
2022-PLATE-9_2022-102_181-P2_Fam1_R1_01	7500 PSI	275	279	283	148	152	NA	319	343	NA	NA	NA	NA	222	242	NA	140	144	NA	196	200	NA	115	115	NA	195	197	197	359	363	365	364	372	372	346	346	NA	191	201	NA	173	175	NA	222	226	NA	154	168	168
2022-PLATE-9_2022-102_182-P2_Fam1_R1_02	7500 PSI	275	279	283	124	148	164	319	343	343	NA	NA	NA	222	234	242	140	144	NA	196	200	200	103	115	115	187	195	197	359	359	363	336	364	372	346	346	NA	191	191	NA	173	173	NA	220	222	226	156	168	NA
2022-PLATE-9_2022-102_183-P2_Fam1_R1_03	7500 PSI	279	279	283	148	152	164	343	343	NA	224	244	249	222	234	234	140	140	NA	200	200	208	103	115	115	187	195	197	359	363	365	336	364	372	346	346	NA	191	191	197	173	173	NA	220	222	226	154	168	168
2022-PLATE-9_2022-102_184-P2_Fam1_R1_04	7500 PSI	267	279	279	148	152	164	343	343	NA	224	244	249	222	234	234	140	140	NA	200	208	NA	115	115	NA	195	197	197	359	363	365	364	372	372	346	346	NA	191	197	201	173	173	175	220	222	226	156	168	168
2022-PLATE-9_2022-102_185-P2_Fam1_R1_05	7500 PSI	275	283	NA	152	164	NA	343	343	NA	NA	NA	NA	234	242	NA	140	140	NA	196	200	200	115	115	NA	195	197	NA	359	359	NA	372	372	NA	346	346	NA	191	197	NA	173	175	NA	220	222	NA	156	168	NA
2022-PLATE-9_2022-102_186-P2_Fam1_R1_06	7500 PSI	279	283	NA	148	152	NA	343	343	NA	224	224	NA	222	234	NA	140	140	NA	196	200	NA	115	115	NA	187	197	NA	363	365	NA	336	372	NA	346	346	NA	197	201	NA	173	173	NA	220	222	NA	168	168	NA
2022-PLATE-9_2022-102_187-P2_Fam1_R1_07	7500 PSI	275	283	NA	124	148	NA	319	343	NA	224	249	NA	222	234	242	140	140	NA	200	200	208	103	115	NA	197	197	NA	363	365	NA	364	372	NA	346	346	360	191	197	NA	173	175	NA	220	222	NA	168	168	NA
2022-PLATE-9_2022-102_188-P2_Fam1_R1_08	7500 PSI	279	283	NA	148	152	NA	319	343	NA	224	244	NA	234	234	NA	140	144	NA	196	200	NA	103	115	NA	195	197	NA	359	365	NA	372	372	NA	346	360	NA	191	201	NA	173	173	175	220	222	NA	156	168	NA
2022-PLATE-9_2022-102_95-P1_Fam1_R1_05	6500 PSI	267	279	NA	152	164	NA	343	343	NA	224	244	NA	222	234	NA	140	144	NA	196	200	NA	103	115	NA	197	197	NA	359	363	NA	364	372	NA	346	346	NA	191	191	NA	173	175	NA	222	226	NA	154	168	NA
2022-PLATE-9_2022-102_96-P1_Fam1_R1_06	6500 PSI	267	275	NA	124	164	NA	343	343	NA	224	249	NA	234	242	NA	140	144	NA	200	208	NA	103	115	NA	197	197	NA	363	365	NA	364	372	NA	346	346	NA	191	201	NA	173	175	NA	222	226	NA	156	168	NA
2022-PLATE-9_2022-102_97-P1_Fam1_R1_07	6500 PSI	267	279	NA	124	164	NA	319	343	NA	NA	NA	NA	222	234	NA	140	144	NA	200	208	NA	103	115	NA	195	197	NA	363	365	NA	372	372	NA	346	360	NA	191	191	NA	173	175	NA	222	226	NA	154	168	NA
2022-PLATE-9_2022-102_98-P1_Fam1_R1_08	6500 PSI	275	283	NA	148	152	NA	343	343	NA	224	244	NA	234	234	NA	140	144	NA	200	208	NA	103	115	NA	187	195	NA	359	359	NA	336	372	NA	346	346	NA	191	201	NA	173	173	NA	222	226	NA	168	168	NA
2022-PLATE-9_2022-102_99-P1_Fam1_R1_09	6500 PSI	279	283	NA	124	164	NA	319	343	NA	224	249	NA	222	242	NA	140	144	NA	200	208	NA	115	115	NA	195	197	NA	359	365	NA	372	372	NA	346	360	NA	191	201	NA	173	175	NA	220	222	NA	154	156	NA
2022-PLATE-10_2022-102_189-P2_Fam1_R1_09	7500 PSI	267	279	NA	148	152	164	319	343	NA	NA	NA	NA	234	234	NA	140	144	NA	196	200	NA	115	115	NA	187	195	NA	359	359	NA	336	372	NA	346	360	NA	191	191	NA	173	173	175	220	222	226	154	168	NA
2022-PLATE-10_2022-102_190-P2_Fam1_R1_10	7500 PSI	275	283	NA	148	152	NA	343	343	NA	224	224	NA	234	234	NA	140	144	NA	200	200	208	103	115	NA	197	197	NA	363	365	NA	364	372	NA	346	360	NA	191	201	NA	173	173	NA	220	222	NA	154	168	168
2022-PLATE-10_2022-102_191-P2_Fam1_R1_11	7500 PSI	279	283	NA	124	148	NA	343	343	NA	NA	NA	NA	222	234	NA	140	140	NA	196	200	NA	103	115	NA	187	197	NA	363	365	NA	336	364	NA	346	346	NA	197	201	NA	173	173	NA	222	226	NA	156	168	NA
2022-PLATE-10_2022-102_192-P2_Fam1_R1_12	7500 PSI	275	279	283	152	164	NA	319	343	NA	224	249	NA	222	234	234	140	144	NA	196	200	NA	103	115	NA	187	195	NA	359	359	NA	336	372	NA	346	346	NA	191	201	NA	173	175	NA	220	222	NA	154	156	NA
2022-PLATE-10_2022-102_193-P2_Fam1_R1_13	7500 PSI	267	275	279	148	152	164	319	343	343	NA	NA	NA	222	234	242	NA	NA	NA	200	200	208	NA	NA	NA	187	195	197	359	359	363	336	364	372	346	346	NA	191	191	201	173	173	NA	220	222	226	154	168	168
2022-PLATE-10_2022-102_194-P2_Fam1_R1_14	7500 PSI	275	283	NA	124	164	NA	343	343	NA	NA	NA	NA	234	234	NA	NA	NA	NA	200	208	NA	115	115	NA	187	197	NA	359	365	NA	336	364	NA	346	346	NA	197	201	NA	173	175	NA	222	226	NA	154	156	NA
2022-PLATE-10_2022-102_195-P2_Fam1_R1_15	7500 PSI	275	283	NA	148	152	NA	343	343	NA	NA	NA	NA	234	234	NA	140	144	NA	196	200	NA	103	115	NA	195	197	NA	359	365	NA	372	372	NA	346	360	NA	191	191	NA	173	175	NA	222	226	NA	168	168	NA
2022-PLATE-10_2022-102_196-P2_Fam2_R1_01	7500 PSI	275	275	283	148	148	152	327	343	343	NA	NA	NA	206	238	242	140	140	NA	188	196	200	103	115	115	187	187	193	359	363	363	336	344	372	352	352	360	197	197	201	173	175	175	220	222	222	154	154	156
2022-PLATE-10_2022-102_197-P2_Fam2_R1_02	7500 PSI	267	275	275	148	152	164	319	327	343	NA	NA	NA	206	234	238	140	140	NA	188	196	200	103	115	115	187	187	NA	359	365	365	336	372	372	352	352	360	197	197	201	175	175	NA	220	220	222	154	154	168
2022-PLATE-10_2022-102_198-P2_Fam2_R1_03	7500 PSI	267	275	NA	152	164	NA	319	327	NA	NA	NA	NA	206	242	NA	NA	NA	NA	188	196	200	103	115	NA	187	197	NA	365	365	NA	372	372	NA	352	360	360	197	201	NA	173	175	175	220	222	NA	154	168	NA
2022-PLATE-10_2022-102_199-P2_Fam2_R1_04	7500 PSI	275	275	283	124	148	164	327	343	343	NA	NA	NA	206	238	242	140	140	144	188	196	200	115	115	NA	187	193	197	363	365	365	344	372	372	346	352	360	191	197	201	175	175	NA	220	222	222	154	154	168
2022-PLATE-10_2022-102_200-P2_Fam2_R1_05	7500 PSI	275	283	NA	124	164	NA	319	343	NA	NA	NA	NA	206	242	NA	NA	NA	NA	200	208	NA	103	115	NA	187	187	193	359	363	365	336	344	372	346	360	NA	197	197	NA	175	175	NA	222	222	NA	154	168	NA
2022-PLATE-10_2022-102_201-P2_Fam2_R1_06	7500 PSI	275	283	NA	148	152	NA	327	343	NA	NA	NA	NA	206	234	238	140	144	NA	188	196	200	103	103	NA	187	193	NA	359	363	NA	336	344	NA	346	352	360	191	201	NA	173	175	NA	220	222	222	154	168	NA
2022-PLATE-10_2022-102_202-P2_Fam2_R1_07	7500 PSI	267	275	275	124	148	164	327	343	343	224	224	NA	206	238	242	NA	NA	NA	200	200	208	103	115	115	193	193	197	363	363	365	344	372	372	346	352	352	197	197	201	173	175	175	222	222	NA	154	154	168
2022-PLATE-10_2022-102_203-P2_Fam2_R1_08	7500 PSI	267	275	275	124	148	148	319	327	343	224	224	NA	206	206	242	140	140	144	200	208	NA	103	103	NA	NA	NA	NA	363	365	NA	344	372	NA	346	352	360	191	197	201	173	173	NA	220	222	222	154	154	156
2022-PLATE-10_2022-102_204-P2_Fam2_R1_09	7500 PSI	267	279	279	152	164	NA	319	327	343	NA	NA	NA	206	238	242	140	140	NA	188	200	208	103	115	NA	193	197	NA	365	365	NA	344	372	NA	360	360	NA	197	197	201	173	175	NA	220	222	222	154	154	156
2022-PLATE-10_2022-102_205-P2_Fam2_R1_10	7500 PSI	267	275	NA	148	152	164	327	343	NA	NA	NA	NA	206	234	238	140	140	NA	200	208	NA	103	115	115	187	193	197	363	365	365	344	344	372	352	360	360	197	201	NA	173	175	175	222	222	NA	154	154	168
2022-PLATE-10_2022-102_206-P2_Fam2_R1_11	7500 PSI	275	283	NA	148	152	164	327	343	343	NA	NA	NA	206	234	238	140	140	NA	200	200	208	103	103	115	187	193	197	363	365	365	344	372	372	346	352	360	197	201	201	175	175	NA	222	222	NA	154	168	NA
2022-PLATE-10_2022-102_207-P2_Fam2_R1_12	7500 PSI	267	275	275	124	148	164	327	343	343	224	224	NA	NA	NA	NA	140	140	NA	NA	NA	NA	103	115	115	187	193	197	363	365	365	344	372	372	352	352	360	197	201	201	173	175	175	222	222	NA	154	156	NA
2022-PLATE-10_2022-102_208-P2_Fam2_R1_13	7500 PSI	275	275	283	124	148	164	319	327	343	NA	NA	NA	206	242	NA	140	140	144	188	188	196	103	115	115	187	193	197	363	365	365	344	372	372	346	352	360	191	197	201	173	173	NA	222	222	NA	154	154	156
2022-PLATE-10_2022-102_209-P2_Fam2_R1_14	7500 PSI	275	275	283	152	164	NA	319	343	NA	224	224	NA	238	242	NA	140	140	NA	188	188	208	103	115	115	187	187	193	359	363	365	336	344	372	346	360	NA	197	197	NA	173	173	NA	222	222	NA	154	168	NA
2022-PLATE-10_2022-102_210-P2_Fam2_R1_15	7500 PSI	275	275	283	148	152	164	319	327	343	NA	NA	NA	206	234	238	140	140	NA	188	208	NA	103	115	NA	187	187	NA	365	365	NA	336	344	NA	360	360	NA	197	197	NA	173	173	NA	222	222	NA	154	168	NA
2022-PLATE-10_2022-102_211-P2_Fam3_R1_01	7500 PSI	267	275	275	148	152	164	315	339	343	NA	NA	NA	234	238	246	140	140	144	192	196	224	115	115	NA	193	195	197	359	359	365	344	352	372	346	346	360	191	197	201	173	173	NA	220	220	222	156	156	168
2022-PLATE-10_2022-102_212-P2_Fam3_R1_02	7500 PSI	267	275	275	148	152	164	315	319	339	224	244	244	238	242	246	140	140	NA	208	224	224	115	115	NA	187	193	195	359	359	NA	336	344	352	346	346	352	197	197	201	173	173	NA	220	220	222	156	156	168
2022-PLATE-10_2022-102_213-P2_Fam3_R1_03	7500 PSI	275	275	283	148	152	164	315	319	339	NA	NA	NA	238	242	246	140	140	NA	192	196	224	115	115	NA	187	193	195	359	359	365	336	344	352	346	346	352	197	197	201	173	173	NA	220	220	222	156	156	NA
2022-PLATE-10_2022-102_214-P2_Fam3_R1_04	7500 PSI	267	275	275	124	164	164	315	339	343	224	244	244	234	238	246	140	140	NA	192	196	224	115	115	NA	193	193	197	359	359	NA	344	352	372	346	352	360	197	197	201	173	173	175	220	220	222	156	156	168
2022-PLATE-10_2022-102_215-P2_Fam3_R1_05	7500 PSI	275	275	283	124	148	164	315	319	339	NA	NA	NA	234	238	246	NA	NA	NA	192	208	224	115	115	NA	187	193	195	359	359	365	336	344	352	346	352	360	197	197	201	173	173	175	220	220	222	156	156	NA
2022-PLATE-10_2022-102_216-P2_Fam3_R1_06	7500 PSI	267	275	275	124	148	164	315	339	343	224	244	244	234	238	246	140	140	144	192	208	224	115	115	NA	187	193	195	359	359	NA	336	344	352	346	352	360	191	197	201	173	173	175	220	220	222	156	156	168
2022-PLATE-10_2022-102_217-P2_Fam3_R1_07	7500 PSI	275	275	283	124	148	164	315	319	339	NA	NA	NA	238	242	246	NA	NA	NA	192	196	224	115	115	NA	187	193	193	359	359	NA	336	344	352	346	346	352	197	201	201	173	173	175	220	220	222	156	156	168
2022-PLATE-10_2022-102_218-P2_Fam3_R1_08	7500 PSI	267	275	275	124	148	164	315	339	343	NA	NA	NA	234	238	246	140	140	144	192	196	224	115	115	NA	187	193	195	359	359	NA	336	344	352	346	346	352	191	197	201	173	173	175	220	220	222	156	156	NA
2022-PLATE-10_2022-102_219-P2_Fam3_R1_09	7500 PSI	267	275	275	148	152	164	315	319	339	NA	NA	NA	234	238	246	140	140	NA	196	224	224	115	115	NA	193	195	197	359	359	365	344	352	372	346	346	352	197	201	201	173	173	175	220	220	222	156	156	168
2022-PLATE-10_2022-102_220-P2_Fam3_R1_10	7500 PSI	267	275	275	148	152	164	315	339	343	NA	NA	NA	238	242	246	140	140	144	192	196	224	115	115	NA	193	195	197	359	359	365	344	352	372	346	346	352	191	197	201	173	173	NA	220	220	222	156	156	168
2022-PLATE-10_2022-102_221-P2_Fam3_R1_11	7500 PSI	267	275	275	124	148	164	315	339	343	224	244	244	238	242	246	140	140	144	196	224	224	103	115	115	187	193	195	359	359	NA	336	344	352	346	346	352	191	197	201	173	173	175	220	220	222	156	156	168
2022-PLATE-10_2022-102_222-P2_Fam3_R1_12	7500 PSI	275	275	283	148	152	164	315	319	339	224	244	244	238	242	246	140	140	NA	192	196	224	103	115	115	193	195	197	359	359	365	344	352	372	346	352	360	197	197	NA	173	173	175	220	220	222	156	156	168
2022-PLATE-10_2022-102_223-P2_Fam3_R1_13	7500 PSI	275	275	283	148	152	164	315	339	343	NA	NA	NA	238	242	246	140	140	144	192	208	224	115	115	NA	193	195	197	359	359	365	344	352	372	346	346	352	191	197	201	173	173	175	220	220	222	156	156	168
2022-PLATE-10_2022-102_224-P2_Fam3_R1_14	7500 PSI	275	275	283	148	152	164	315	319	339	NA	NA	NA	238	242	246	140	140	144	192	208	224	103	115	115	187	193	195	359	359	NA	336	344	352	346	346	352	191	197	201	173	173	NA	220	220	222	156	156	NA
2022-PLATE-10_2022-102_225-P2_Fam3_R1_15	7500 PSI	267	275	275	124	148	164	315	339	343	NA	NA	NA	238	242	246	140	140	NA	192	196	224	103	115	115	187	193	195	359	359	NA	336	344	352	346	352	360	197	201	201	173	173	175	220	220	222	156	156	168
2022-PLATE-10_2022-102_226-P2_Fam1_R2_01	7500 PSI	267	275	275	148	152	164	319	343	343	224	244	249	222	234	234	140	140	144	200	200	208	103	115	115	187	195	197	359	359	363	336	364	372	346	346	360	191	191	201	173	173	NA	220	222	226	154	168	168
2022-PLATE-10_2022-102_227-P2_Fam1_R2_02	7500 PSI	275	283	NA	148	152	NA	319	343	NA	224	244	NA	234	242	NA	140	144	NA	196	200	NA	115	115	NA	187	195	NA	359	365	NA	336	372	NA	346	346	NA	191	191	NA	173	175	NA	222	226	NA	154	156	NA
2022-PLATE-10_2022-102_228-P2_Fam1_R2_03	7500 PSI	279	279	283	124	148	164	319	343	343	NA	NA	NA	NA	NA	NA	NA	NA	NA	200	200	208	103	115	115	195	197	197	359	359	365	364	372	372	346	346	NA	191	197	201	173	173	NA	220	222	226	154	156	168
2022-PLATE-10_2022-102_229-P2_Fam1_R2_04	7500 PSI	279	279	283	152	164	164	319	343	343	224	244	249	222	234	234	140	140	NA	196	200	200	115	115	NA	195	197	197	359	363	365	364	372	372	346	346	NA	191	197	201	173	173	175	220	222	226	154	156	168
2022-PLATE-10_2022-102_230-P2_Fam1_R2_05	7500 PSI	279	279	283	124	148	164	343	343	NA	224	244	249	222	234	242	140	140	NA	196	200	200	103	115	115	187	195	197	359	363	365	336	364	372	346	346	NA	191	197	201	173	173	175	220	222	226	154	156	168
2022-PLATE-10_2022-102_231-P2_Fam1_R2_06	7500 PSI	267	275	275	148	152	164	319	343	343	NA	NA	NA	222	234	242	NA	NA	NA	200	200	208	115	115	NA	187	195	195	359	359	NA	336	372	372	346	346	360	191	191	201	173	173	NA	220	222	226	154	168	168
2022-PLATE-10_2022-102_232-P2_Fam1_R2_07	7500 PSI	275	283	NA	124	164	NA	319	343	343	NA	NA	NA	234	234	NA	NA	NA	NA	196	200	NA	103	115	NA	195	197	NA	359	365	NA	372	372	NA	346	346	360	191	197	201	173	175	NA	222	226	NA	154	168	NA
2022-PLATE-10_2022-102_233-P2_Fam1_R2_08	7500 PSI	275	279	283	124	164	NA	319	343	NA	NA	NA	NA	234	242	NA	140	140	NA	200	208	NA	115	115	NA	197	197	NA	363	365	NA	364	372	NA	346	346	360	197	201	NA	173	175	NA	220	222	NA	168	168	NA
2022-PLATE-10_2022-102_234-P2_Fam1_R2_09	7500 PSI	275	279	283	124	148	164	343	343	NA	224	244	249	NA	NA	NA	140	140	144	NA	NA	NA	103	115	117	NA	NA	NA	359	359	NA	336	364	372	346	346	NA	191	191	201	173	173	175	220	222	226	154	168	168
2022-PLATE-10_2022-102_235-P2_Fam1_R2_10	7500 PSI	279	279	283	148	152	164	343	343	NA	NA	NA	NA	222	234	242	140	140	144	196	200	200	115	115	NA	197	197	NA	359	363	363	364	372	372	346	346	360	191	191	201	173	173	175	220	222	226	154	168	168
2022-PLATE-10_2022-102_236-P2_Fam1_R2_11	7500 PSI	279	279	283	124	148	164	343	343	NA	NA	NA	NA	222	234	242	NA	NA	NA	196	200	200	NA	NA	NA	NA	NA	NA	363	363	365	364	372	372	346	346	360	191	197	201	173	173	175	220	222	226	154	168	168
2022-PLATE-10_2022-102_237-P2_Fam1_R2_12	7500 PSI	275	279	283	124	148	164	343	343	NA	224	244	249	222	234	234	140	140	NA	196	200	200	103	115	115	195	197	197	359	359	363	364	372	372	346	346	NA	191	197	201	173	173	175	220	222	226	154	168	168
2022-PLATE-10_2022-102_238-P2_Fam1_R2_13	7500 PSI	275	283	NA	124	148	NA	343	343	NA	NA	NA	NA	222	234	242	140	144	NA	200	208	NA	103	115	NA	187	195	NA	359	359	NA	336	372	NA	346	360	NA	191	191	NA	173	175	NA	222	226	NA	168	168	NA
2022-PLATE-10_2022-102_239-P2_Fam1_R2_14	7500 PSI	267	275	275	148	152	164	343	343	NA	224	244	249	222	234	242	140	140	144	200	200	208	115	115	NA	187	195	197	359	359	NA	336	364	372	346	346	360	191	191	NA	173	173	175	220	222	226	154	168	168
2022-PLATE-10_2022-102_240-P2_Fam1_R2_15	7500 PSI	267	279	279	124	148	164	319	343	343	NA	NA	NA	222	234	242	NA	NA	NA	200	200	208	115	115	NA	187	197	197	359	363	363	336	364	364	346	346	360	191	197	201	173	173	NA	220	222	226	154	168	168
2022-PLATE-10_2022-102_241-P2_Fam2_R2_01	7500 PSI	267	275	275	124	148	164	319	327	327	NA	NA	NA	206	238	242	140	140	144	188	200	208	103	103	115	187	187	193	359	363	365	336	344	372	346	352	360	191	197	201	173	175	175	220	220	222	154	154	156
2022-PLATE-10_2022-102_242-P2_Fam2_R2_02	7500 PSI	267	275	275	124	148	164	319	327	343	NA	NA	NA	206	238	242	140	144	NA	196	200	NA	103	115	NA	187	187	193	359	363	365	336	344	372	346	352	360	191	197	NA	173	173	NA	222	222	NA	154	154	156
2022-PLATE-10_2022-102_243-P2_Fam2_R2_03	7500 PSI	267	275	275	124	148	164	319	327	343	NA	NA	NA	206	238	242	140	140	144	188	196	200	103	115	115	187	193	197	363	365	365	344	372	372	346	360	NA	191	197	197	175	175	NA	220	222	222	154	154	168
2022-PLATE-10_2022-102_244-P2_Fam2_R2_04	7500 PSI	267	275	275	124	164	NA	327	343	343	NA	NA	NA	206	238	242	140	140	144	188	196	200	103	103	115	187	187	193	363	363	365	336	344	372	360	360	NA	191	197	201	173	173	175	220	220	222	154	154	168
2022-PLATE-10_2022-102_245-P2_Fam2_R2_05	7500 PSI	275	275	283	148	152	164	327	343	NA	NA	NA	NA	234	238	238	140	140	144	196	200	200	103	103	115	187	187	193	359	363	365	336	344	372	346	360	360	191	197	201	173	173	175	222	222	NA	154	154	168
2022-PLATE-10_2022-102_246-P2_Fam2_R2_06	7500 PSI	267	275	275	124	148	164	327	343	343	NA	NA	NA	206	238	242	140	144	NA	188	200	208	103	115	NA	187	187	193	363	365	365	336	344	372	360	360	NA	191	201	NA	173	175	NA	220	222	222	154	154	168
2022-PLATE-10_2022-102_247-P2_Fam2_R2_07	7500 PSI	267	275	NA	152	164	NA	NA	NA	NA	224	224	NA	206	242	NA	140	140	NA	188	196	200	103	115	NA	187	193	NA	359	363	NA	336	344	NA	352	352	360	197	197	201	173	175	NA	220	222	222	154	156	NA
2022-PLATE-10_2022-102_248-P2_Fam2_R2_08	7500 PSI	267	275	NA	148	152	164	343	343	NA	224	224	NA	206	234	238	140	140	144	200	208	NA	103	103	115	187	187	NA	365	365	NA	336	372	372	346	352	360	191	197	197	173	173	NA	220	220	222	154	154	168
2022-PLATE-10_2022-102_249-P2_Fam2_R2_09	7500 PSI	267	275	275	152	164	NA	327	343	343	NA	NA	NA	206	242	NA	140	144	NA	196	200	NA	103	103	115	193	197	NA	359	363	NA	372	372	NA	352	360	360	191	201	NA	175	175	NA	220	222	NA	154	156	NA
2022-PLATE-10_2022-102_250-P2_Fam2_R2_10	7500 PSI	267	275	275	148	152	164	327	343	343	NA	NA	NA	206	238	242	140	140	NA	188	196	200	103	103	115	187	193	197	363	365	365	344	372	372	346	352	360	197	197	201	173	173	NA	220	222	222	154	154	156
2022-PLATE-10_2022-102_251-P2_Fam2_R2_11	7500 PSI	267	275	275	148	152	164	327	343	343	NA	NA	NA	206	238	242	140	140	144	188	196	200	115	115	NA	187	193	197	363	365	365	344	372	372	346	352	360	191	197	197	173	173	175	220	222	222	154	154	168
2022-PLATE-10_2022-102_252-P2_Fam2_R2_12	7500 PSI	267	275	275	152	164	NA	319	327	343	NA	NA	NA	234	238	NA	140	140	NA	200	208	NA	103	115	115	187	187	193	359	363	365	336	344	372	352	360	360	197	201	NA	173	175	NA	220	220	222	154	154	168
2022-PLATE-10_2022-102_253-P2_Fam2_R2_13	7500 PSI	275	275	283	124	148	164	327	343	343	224	224	NA	NA	NA	NA	140	140	144	NA	NA	NA	103	103	115	187	193	197	363	363	365	344	372	372	352	360	360	191	197	201	173	173	175	220	222	222	154	156	NA
2022-PLATE-10_2022-102_254-P2_Fam2_R2_14	7500 PSI	275	283	NA	124	148	164	NA	NA	NA	NA	NA	NA	206	234	238	140	140	NA	200	208	NA	103	103	115	187	193	197	363	363	365	344	372	372	346	352	352	197	197	NA	173	173	NA	222	222	NA	154	168	NA
2022-PLATE-10_2022-102_255-P2_Fam2_R2_15	7500 PSI	267	275	275	148	152	164	327	343	343	NA	NA	NA	206	238	242	140	140	NA	188	196	200	103	103	115	187	187	193	359	363	365	336	344	372	352	360	360	197	197	201	173	175	175	220	222	222	154	154	156
2022-PLATE-10_2022-102_256-P2_Fam3_R2_01	7500 PSI	267	275	275	148	152	164	315	319	339	NA	NA	NA	238	242	246	140	140	NA	192	196	224	115	115	NA	193	195	197	359	359	365	344	352	372	346	346	352	197	197	201	173	173	NA	220	220	222	156	156	168
2022-PLATE-10_2022-102_257-P2_Fam3_R2_02	7500 PSI	267	275	275	124	148	164	339	339	343	NA	NA	NA	234	238	246	140	140	144	192	208	224	115	115	NA	187	193	195	359	359	NA	336	344	352	346	346	352	191	197	201	173	173	175	220	220	222	156	156	NA
2022-PLATE-10_2022-102_258-P2_Fam3_R2_03	7500 PSI	267	275	275	124	148	164	315	319	339	NA	NA	NA	238	242	246	NA	NA	NA	192	208	224	103	115	115	NA	NA	NA	359	359	365	344	352	372	346	352	360	197	201	201	173	173	175	220	220	222	156	156	NA
2022-PLATE-10_2022-102_259-P2_Fam3_R2_04	7500 PSI	267	275	275	148	152	164	315	339	343	224	244	244	234	238	246	140	140	NA	192	208	224	103	115	115	187	195	195	359	359	365	336	344	352	346	352	360	197	197	201	173	173	NA	220	220	222	156	156	NA
2022-PLATE-10_2022-102_260-P2_Fam3_R2_05	7500 PSI	267	275	275	124	148	164	315	315	319	224	244	244	NA	NA	NA	140	140	144	NA	NA	NA	103	115	115	187	193	195	359	359	NA	336	344	352	NA	NA	NA	191	197	197	NA	NA	NA	NA	NA	NA	156	156	168
2022-PLATE-10_2022-102_261-P2_Fam3_R2_06	7500 PSI	275	275	283	124	148	164	315	319	339	224	244	244	NA	NA	NA	140	140	NA	NA	NA	NA	103	115	115	187	193	193	359	359	NA	336	344	352	352	352	360	197	197	NA	173	173	NA	220	220	222	156	156	168
2022-PLATE-10_2022-102_262-P2_Fam3_R2_07	7500 PSI	267	275	275	124	148	164	315	339	343	NA	NA	NA	238	242	246	140	140	NA	192	208	224	115	115	NA	193	195	197	359	359	365	344	352	372	346	352	360	197	197	201	173	173	NA	220	220	222	156	156	NA
2022-PLATE-10_2022-102_263-P2_Fam3_R2_08	7500 PSI	267	275	275	124	148	164	315	339	343	224	244	244	234	238	246	140	140	NA	192	196	224	103	115	115	187	193	193	359	359	NA	336	344	352	346	346	352	197	197	NA	173	173	NA	220	220	222	156	156	168
2022-PLATE-10_2022-102_264-P2_Fam3_R2_09	7500 PSI	267	275	275	148	152	164	315	339	343	NA	NA	NA	238	242	246	NA	NA	NA	192	196	224	103	115	115	193	195	197	359	359	365	344	352	372	346	346	352	197	197	201	173	173	NA	220	220	222	156	156	168
2022-PLATE-10_2022-102_265-P2_Fam3_R2_10	7500 PSI	267	275	275	124	148	164	315	339	343	NA	NA	NA	234	238	246	140	140	144	192	208	224	115	115	NA	187	193	195	359	359	365	336	344	352	346	346	NA	191	197	201	173	173	175	220	220	222	156	156	168
2022-PLATE-10_2022-102_266-P2_Fam3_R2_11	7500 PSI	275	275	283	124	148	164	315	319	339	NA	NA	NA	234	238	246	140	140	NA	192	196	224	103	115	115	193	195	197	359	359	365	344	352	372	346	352	360	197	197	201	173	173	175	220	220	222	156	156	168
2022-PLATE-10_2022-102_267-P2_Fam3_R2_12	7500 PSI	267	275	275	148	152	164	315	339	343	224	244	244	234	238	246	140	140	144	192	196	224	115	115	NA	187	193	193	359	359	NA	336	344	352	346	352	360	191	197	201	173	173	175	220	220	222	156	156	168
2022-PLATE-10_2022-102_268-P2_Fam3_R2_13	7500 PSI	267	275	275	148	152	164	315	339	343	NA	NA	NA	238	242	246	NA	NA	NA	192	196	224	103	115	115	187	193	195	359	359	NA	336	344	352	346	346	352	197	197	201	173	173	NA	220	220	222	156	156	NA
2022-PLATE-10_2022-102_269-P2_Fam3_R2_14	7500 PSI	275	275	283	148	152	164	315	339	343	224	244	244	238	242	246	140	140	NA	192	208	224	103	115	115	193	193	197	359	359	365	344	352	372	346	352	360	197	201	201	173	173	NA	220	220	222	156	156	168
2022-PLATE-10_2022-102_270-P2_Fam3_R2_15	7500 PSI	267	275	275	124	148	164	315	339	343	224	244	244	238	238	242	140	140	144	192	196	224	115	115	NA	187	193	195	359	359	NA	336	344	352	346	346	352	191	197	201	173	173	NA	220	220	222	156	156	NA
2022-PLATE-10_2022-102_271-P3_Fam1_R1_01	8500 PSI	275	275	283	124	148	164	343	343	NA	224	244	249	222	234	234	140	140	144	200	200	208	115	115	NA	187	195	197	359	359	363	336	364	372	346	346	360	191	191	201	173	173	175	220	220	222	156	168	168
2022-PLATE-10_2022-102_272-P3_Fam1_R1_02	8500 PSI	279	283	NA	124	148	NA	343	343	NA	NA	NA	NA	222	242	NA	140	144	NA	200	208	NA	115	115	NA	197	197	NA	359	365	NA	364	372	NA	346	346	NA	191	191	NA	173	175	NA	220	222	NA	154	156	NA
2022-PLATE-10_2022-102_273-P3_Fam1_R1_03	8500 PSI	275	275	283	148	152	164	319	343	343	224	244	249	222	234	234	140	140	144	200	200	208	103	115	115	195	197	197	359	359	365	364	372	372	346	346	360	191	201	201	173	173	NA	220	222	226	154	168	168
2022-PLATE-10_2022-102_274-P3_Fam1_R1_04	8500 PSI	267	275	279	124	148	164	343	343	NA	224	244	249	222	234	242	140	140	NA	200	200	208	115	115	NA	197	197	NA	359	363	363	364	372	372	346	346	360	197	201	201	173	173	NA	220	222	NA	154	154	168
2022-PLATE-10_2022-102_275-P3_Fam1_R1_05	8500 PSI	279	279	283	124	148	164	343	343	NA	NA	NA	NA	222	234	234	NA	NA	NA	200	200	208	115	115	NA	195	195	197	359	359	365	364	372	372	346	346	NA	191	191	201	173	173	NA	220	222	226	156	168	168
2022-PLATE-10_2022-102_276-P3_Fam1_R1_06	8500 PSI	279	279	283	124	148	NA	343	343	NA	NA	NA	NA	222	234	234	NA	NA	NA	200	200	208	103	115	NA	187	195	197	359	359	363	336	364	372	346	346	360	191	191	201	173	173	NA	222	226	226	154	156	168
2022-PLATE-10_2022-102_277-P3_Fam1_R1_07	8500 PSI	279	279	283	148	152	164	343	343	NA	224	244	249	222	234	234	140	140	NA	200	200	208	103	115	115	195	197	197	359	363	365	364	372	372	346	346	NA	191	197	201	173	173	NA	220	222	226	156	168	168
2022-PLATE-10_2022-102_278-P3_Fam1_R1_08	8500 PSI	267	275	279	124	148	164	343	343	NA	NA	NA	NA	222	234	234	140	140	144	200	200	208	103	115	115	187	195	197	359	363	365	336	364	372	346	346	NA	191	191	201	173	173	NA	220	222	226	154	154	156
2022-PLATE-10_2022-102_279-P3_Fam1_R1_09	8500 PSI	275	275	283	148	152	164	319	343	NA	224	244	249	222	234	242	140	140	NA	196	200	200	115	115	NA	195	197	197	359	363	365	364	372	372	346	346	360	191	197	NA	173	173	NA	220	222	226	154	168	168
2022-PLATE-10_2022-102_280-P3_Fam1_R1_10	8500 PSI	275	275	283	124	148	164	319	343	343	NA	NA	NA	222	234	242	NA	NA	NA	196	200	200	115	115	NA	195	197	197	359	363	365	364	372	372	346	346	NA	191	197	201	173	173	175	220	222	226	154	156	168
2022-PLATE-10_2022-102_281-P3_Fam1_R1_11	8500 PSI	267	275	279	124	148	164	319	343	343	NA	NA	NA	222	234	242	140	140	144	200	200	208	103	115	115	187	195	197	359	359	363	336	364	372	346	346	NA	191	201	201	173	173	NA	220	222	226	154	168	168
2022-PLATE-10_2022-102_282-P3_Fam1_R1_12	8500 PSI	267	279	279	124	148	164	319	343	343	224	244	249	222	234	234	140	140	NA	196	200	200	103	115	115	187	195	195	359	359	NA	336	364	372	346	346	NA	191	197	201	173	173	175	222	226	226	154	168	168
2022-PLATE-11_2022-102_283-P3_Fam1_R1_13	8500 PSI	275	279	283	124	148	164	319	343	343	NA	NA	NA	222	234	242	140	140	144	196	200	200	115	115	NA	197	197	NA	363	363	365	364	364	372	346	346	360	191	201	201	173	173	NA	220	220	222	168	168	NA
2022-PLATE-11_2022-102_284-P3_Fam1_R1_14	8500 PSI	275	275	283	124	148	164	343	343	NA	NA	NA	NA	222	234	242	140	140	NA	200	200	208	103	115	115	197	197	NA	363	363	365	356	364	372	346	346	NA	191	197	201	173	173	NA	220	222	226	168	168	NA
2022-PLATE-11_2022-102_285-P3_Fam1_R1_15	8500 PSI	267	279	279	124	148	164	343	343	NA	NA	NA	NA	222	234	234	NA	NA	NA	196	200	200	115	115	NA	187	195	195	359	359	NA	336	364	372	346	346	360	191	197	201	173	173	175	220	222	226	154	156	168
2022-PLATE-11_2022-102_286-P3_Fam2_R1_01	8500 PSI	267	275	275	124	148	164	327	343	343	NA	NA	NA	206	234	238	140	140	144	188	196	200	103	103	115	193	193	197	359	363	363	344	372	372	346	352	360	191	197	201	175	175	NA	220	220	222	154	154	156
2022-PLATE-11_2022-102_287-P3_Fam2_R1_02	8500 PSI	275	275	283	124	148	164	327	343	343	NA	NA	NA	238	238	242	NA	NA	NA	200	200	208	103	115	115	NA	NA	NA	359	365	365	336	344	372	346	352	360	197	197	NA	173	173	NA	220	222	222	154	154	156
2022-PLATE-11_2022-102_288-P3_Fam2_R1_03	8500 PSI	275	275	283	148	152	164	327	343	343	NA	NA	NA	206	234	238	140	140	144	188	196	200	103	103	115	187	187	197	365	365	NA	344	372	372	346	352	360	191	197	201	173	175	175	220	222	222	154	154	168
2022-PLATE-11_2022-102_289-P3_Fam2_R1_04	8500 PSI	267	275	275	148	148	152	319	327	343	224	224	NA	206	234	238	140	140	144	188	196	200	103	103	NA	187	187	193	359	363	365	336	344	372	352	360	360	191	197	201	173	173	NA	220	222	222	154	154	168
2022-PLATE-11_2022-102_290-P3_Fam2_R1_05	8500 PSI	275	275	283	124	148	164	319	327	343	NA	NA	NA	206	238	242	140	140	144	188	200	208	103	103	115	187	193	197	359	363	365	344	372	372	352	360	360	191	197	201	173	175	175	220	222	222	154	154	156
2022-PLATE-11_2022-102_291-P3_Fam2_R1_06	8500 PSI	267	275	275	148	152	164	327	343	343	NA	NA	NA	206	206	234	140	140	144	NA	NA	NA	NA	NA	NA	NA	NA	NA	359	363	365	336	344	372	346	352	360	191	197	201	173	173	175	220	222	222	154	154	156
2022-PLATE-11_2022-102_292-P3_Fam2_R1_07	8500 PSI	267	275	275	148	152	164	319	327	343	NA	NA	NA	206	206	234	140	140	144	188	200	208	103	103	115	187	193	197	359	363	365	344	372	372	346	352	360	191	197	201	173	175	175	220	222	222	154	154	156
2022-PLATE-11_2022-102_293-P3_Fam2_R1_08	8500 PSI	275	275	283	148	152	164	327	343	343	NA	NA	NA	206	206	242	140	140	144	188	196	200	103	103	115	187	193	197	365	365	NA	344	372	372	346	352	360	191	197	201	173	173	NA	220	222	222	154	154	168
2022-PLATE-11_2022-102_294-P3_Fam2_R1_09	8500 PSI	267	275	275	124	148	164	343	343	NA	NA	NA	NA	206	234	238	140	140	144	188	200	208	NA	NA	NA	NA	NA	NA	363	365	365	336	344	372	360	360	NA	191	197	201	173	173	NA	220	222	222	154	154	168
2022-PLATE-11_2022-102_295-P3_Fam2_R1_10	8500 PSI	275	275	283	148	152	164	319	343	343	NA	NA	NA	238	242	NA	NA	NA	NA	188	200	208	103	103	115	187	187	197	359	365	365	344	372	372	352	360	360	197	197	201	173	175	175	220	222	222	154	154	156
2022-PLATE-11_2022-102_296-P3_Fam2_R1_11	8500 PSI	275	275	283	148	152	164	319	327	343	NA	NA	NA	206	238	242	140	140	NA	188	196	200	103	115	115	187	193	197	363	365	365	344	372	372	346	352	360	197	197	201	173	175	175	220	220	222	154	154	156
2022-PLATE-11_2022-102_297-P3_Fam2_R1_12	8500 PSI	275	275	283	124	148	164	319	327	343	NA	NA	NA	206	238	242	140	140	NA	188	196	200	103	103	115	187	187	193	359	363	365	336	344	372	346	352	360	197	201	201	173	173	175	220	220	222	154	154	156
2022-PLATE-11_2022-102_298-P3_Fam2_R1_13	8500 PSI	275	275	283	148	152	164	327	343	343	NA	NA	NA	206	234	238	140	140	144	188	200	208	103	115	115	187	187	NA	365	365	NA	336	344	372	352	360	360	191	197	201	175	175	NA	222	222	NA	154	154	168
2022-PLATE-11_2022-102_299-P3_Fam2_R1_14	8500 PSI	267	275	275	124	148	164	319	343	343	NA	NA	NA	206	238	242	NA	NA	NA	188	200	208	115	115	NA	187	193	197	363	365	365	344	372	372	346	352	360	197	197	201	175	175	NA	220	220	222	154	154	156
2022-PLATE-11_2022-102_300-P3_Fam2_R1_15	8500 PSI	267	275	275	148	152	164	327	343	343	NA	NA	NA	206	234	238	140	140	144	188	200	208	103	103	115	187	193	197	363	365	365	344	372	372	352	360	360	191	197	201	173	173	NA	220	222	222	154	154	156
2022-PLATE-11_2022-102_301-P3_Fam3_R1_01	8500 PSI	267	275	275	148	152	164	319	339	339	NA	NA	NA	238	242	246	140	140	144	192	196	224	115	115	NA	187	193	195	359	359	NA	336	344	352	346	352	360	191	197	201	173	173	175	220	220	222	156	156	168
2022-PLATE-11_2022-102_302-P3_Fam3_R1_02	8500 PSI	271	275	275	148	152	164	315	339	343	224	244	244	NA	NA	NA	140	140	144	192	208	224	115	115	NA	193	195	197	359	359	365	344	352	372	346	352	360	191	197	201	173	173	175	220	220	222	156	156	NA
2022-PLATE-11_2022-102_303-P3_Fam3_R1_03	8500 PSI	275	275	283	148	152	164	315	315	319	224	244	244	238	242	246	140	140	144	192	196	224	115	115	NA	187	193	195	359	359	NA	336	344	352	346	352	360	191	197	201	173	173	175	220	220	222	156	156	NA
2022-PLATE-11_2022-102_304-P3_Fam3_R1_04	8500 PSI	275	275	283	124	148	164	315	319	339	NA	NA	NA	238	242	246	140	140	144	192	192	208	115	115	NA	187	193	195	359	359	NA	336	344	352	346	346	352	191	197	201	173	173	NA	220	220	222	156	156	NA
2022-PLATE-11_2022-102_305-P3_Fam3_R1_05	8500 PSI	275	275	283	124	148	164	315	319	339	224	244	244	234	246	246	140	140	144	192	192	196	103	115	115	193	195	197	359	359	365	344	352	372	346	346	NA	191	197	201	173	173	175	220	220	222	156	156	NA
2022-PLATE-11_2022-102_306-P3_Fam3_R1_06	8500 PSI	275	275	283	124	148	164	315	319	339	NA	NA	NA	238	242	246	140	140	144	192	196	224	103	115	115	193	193	197	NA	NA	NA	344	352	372	346	352	360	NA	NA	NA	173	173	NA	220	220	222	NA	NA	NA
2022-PLATE-11_2022-102_307-P3_Fam3_R1_07	8500 PSI	267	275	275	124	164	164	315	319	339	NA	NA	NA	238	242	246	140	140	144	192	208	224	103	115	115	NA	NA	NA	359	359	365	344	352	372	346	346	352	191	197	201	173	173	175	220	220	222	156	156	168
2022-PLATE-11_2022-102_308-P3_Fam3_R1_08	8500 PSI	267	275	275	124	148	164	315	319	339	NA	NA	NA	238	242	246	NA	NA	NA	192	196	224	115	115	NA	187	193	195	359	359	365	336	344	352	346	346	352	197	201	201	173	173	175	220	220	222	156	156	NA
2022-PLATE-11_2022-102_309-P3_Fam3_R1_09	8500 PSI	267	275	275	148	152	164	315	319	339	NA	NA	NA	NA	NA	NA	NA	NA	NA	NA	NA	NA	NA	NA	NA	NA	NA	NA	359	359	365	344	352	372	346	346	352	197	197	201	173	173	175	220	220	222	156	156	168
2022-PLATE-11_2022-102_310-P3_Fam3_R1_10	8500 PSI	275	275	283	148	152	164	315	319	339	224	244	244	238	242	246	140	140	NA	192	208	224	103	115	115	187	193	193	359	359	365	336	344	352	346	352	360	197	197	201	173	173	NA	220	220	222	156	156	168
2022-PLATE-11_2022-102_311-P3_Fam3_R1_11	8500 PSI	275	275	283	124	148	164	315	319	339	NA	NA	NA	238	242	246	NA	NA	NA	208	224	224	NA	NA	NA	NA	NA	NA	359	359	365	344	352	372	346	352	360	197	197	NA	173	173	175	220	220	222	156	156	168
2022-PLATE-11_2022-102_312-P3_Fam3_R1_12	8500 PSI	267	275	275	124	148	164	315	319	339	224	244	244	NA	NA	NA	140	140	NA	192	192	196	115	115	NA	187	193	195	359	359	NA	336	344	352	346	346	352	197	197	NA	173	173	175	220	220	222	156	156	168
2022-PLATE-11_2022-102_313-P3_Fam3_R1_13	8500 PSI	275	275	283	124	148	164	315	339	343	224	244	244	NA	NA	NA	140	140	144	192	196	224	103	115	115	193	193	197	359	359	365	344	352	372	346	346	NA	191	197	201	173	173	175	220	220	222	156	156	168
2022-PLATE-11_2022-102_314-P3_Fam3_R1_14	8500 PSI	275	275	283	124	148	164	315	319	339	224	244	244	238	242	246	140	140	144	192	196	224	103	115	115	187	193	195	359	359	365	336	344	352	352	352	360	191	197	201	173	173	NA	220	220	222	156	156	NA
2022-PLATE-11_2022-102_315-P3_Fam3_R1_15	8500 PSI	275	275	283	124	148	164	315	319	339	NA	NA	NA	234	238	246	140	140	144	192	208	224	115	115	NA	193	195	197	359	359	365	344	352	372	346	346	352	191	197	201	173	173	175	220	220	222	156	156	168
2022-PLATE-11_2022-102_316-P3_Fam1_R2_01	8500 PSI	279	279	283	148	152	164	319	343	343	224	244	249	222	234	234	140	140	144	196	200	200	115	115	NA	195	197	197	359	363	365	364	372	372	346	346	NA	191	191	201	173	173	175	220	220	222	156	168	168
2022-PLATE-11_2022-102_317-P3_Fam1_R2_02	8500 PSI	267	275	NA	124	148	NA	319	343	343	224	244	249	242	242	NA	140	144	NA	196	200	200	115	115	NA	195	197	197	359	363	365	364	372	372	346	346	NA	191	201	NA	173	173	175	220	222	226	154	168	168
2022-PLATE-11_2022-102_318-P3_Fam1_R2_03	8500 PSI	275	275	283	124	148	164	NA	NA	NA	NA	NA	NA	NA	NA	NA	140	140	NA	196	200	200	103	115	115	NA	NA	NA	NA	NA	NA	NA	NA	NA	NA	NA	NA	191	197	201	NA	NA	NA	NA	NA	NA	168	168	NA
2022-PLATE-11_2022-102_319-P3_Fam1_R2_04	8500 PSI	275	279	283	124	148	164	319	343	343	224	244	249	222	234	234	140	140	144	196	200	200	115	115	NA	195	197	197	363	363	365	364	372	372	346	346	NA	191	191	201	173	173	NA	220	222	226	154	154	156
2022-PLATE-11_2022-102_320-P3_Fam1_R2_05	8500 PSI	267	267	NA	152	152	NA	343	343	NA	224	224	NA	234	234	NA	140	140	NA	208	208	NA	103	103	NA	197	197	NA	365	365	NA	372	372	NA	346	346	NA	197	197	NA	175	175	NA	222	222	NA	168	168	NA
2022-PLATE-11_2022-102_321-P3_Fam1_R2_06	8500 PSI	NA	NA	NA	NA	NA	NA	NA	NA	NA	NA	NA	NA	NA	NA	NA	NA	NA	NA	NA	NA	NA	NA	NA	NA	NA	NA	NA	NA	NA	NA	NA	NA	NA	NA	NA	NA	NA	NA	NA	NA	NA	NA	NA	NA	NA	NA	NA	NA
2022-PLATE-11_2022-102_322-P3_Fam1_R2_07	8500 PSI	275	279	283	148	152	164	319	343	343	NA	NA	NA	222	234	234	140	140	144	NA	NA	NA	NA	NA	NA	187	197	NA	363	363	365	364	372	372	346	346	NA	191	191	201	173	173	NA	220	222	226	154	154	156
2022-PLATE-11_2022-102_323-P3_Fam1_R2_08	8500 PSI	267	279	NA	124	164	NA	343	343	NA	NA	NA	NA	234	234	NA	140	140	NA	196	200	NA	103	115	NA	187	197	NA	359	363	NA	336	364	NA	346	360	NA	197	201	NA	173	175	NA	222	226	NA	154	168	NA
2022-PLATE-11_2022-102_324-P3_Fam1_R2_09	8500 PSI	267	275	NA	124	148	NA	319	343	NA	224	244	NA	222	242	NA	140	140	NA	196	200	NA	103	115	NA	197	197	NA	359	363	NA	372	372	NA	346	360	NA	197	201	NA	173	173	175	220	222	226	154	156	168
2022-PLATE-11_2022-102_325-P3_Fam1_R2_10	8500 PSI	267	275	279	124	164	NA	319	343	NA	NA	NA	NA	222	234	NA	140	140	144	200	208	NA	115	115	NA	187	197	NA	359	363	NA	336	364	NA	346	360	NA	191	191	201	173	173	NA	220	222	NA	154	156	NA
2022-PLATE-11_2022-102_326-P3_Fam1_R2_11	8500 PSI	267	275	275	148	152	164	319	343	343	224	244	249	234	234	NA	140	140	NA	200	200	208	115	115	NA	187	195	197	359	359	363	336	364	372	346	346	360	191	197	201	173	173	NA	220	222	226	154	154	156
2022-PLATE-11_2022-102_327-P3_Fam1_R2_12	8500 PSI	275	283	NA	148	152	NA	319	343	NA	224	249	NA	222	222	234	140	140	144	200	208	NA	103	115	115	187	197	NA	363	365	NA	336	364	NA	346	346	NA	191	191	201	173	173	175	220	222	NA	154	168	NA
2022-PLATE-11_2022-102_328-P3_Fam1_R2_13	8500 PSI	275	279	283	124	148	164	319	343	343	NA	NA	NA	222	234	234	140	140	NA	200	200	208	115	115	NA	187	195	197	359	359	365	336	364	372	346	346	360	191	197	201	173	173	NA	220	222	226	156	168	168
2022-PLATE-11_2022-102_329-P3_Fam1_R2_14	8500 PSI	275	275	283	148	152	164	343	343	NA	224	244	249	222	234	242	140	140	144	200	200	208	115	115	NA	197	197	NA	359	363	363	364	364	372	346	346	NA	191	191	201	173	173	175	220	222	226	154	156	168
2022-PLATE-11_2022-102_330-P3_Fam1_R2_15	8500 PSI	267	267	NA	124	148	NA	319	319	NA	224	224	NA	242	242	NA	140	140	NA	208	208	NA	115	115	NA	187	187	NA	359	359	NA	336	336	NA	360	360	NA	197	197	NA	175	175	NA	222	222	NA	156	156	NA
2022-PLATE-11_2022-102_331-P3_Fam2_R2_01	8500 PSI	275	275	283	148	152	164	319	343	343	NA	NA	NA	NA	NA	NA	NA	NA	NA	188	196	200	103	103	115	187	193	197	363	365	365	344	372	372	346	360	360	191	197	201	173	175	175	220	220	222	154	154	168
2022-PLATE-11_2022-102_332-P3_Fam2_R2_02	8500 PSI	275	275	283	124	148	164	327	327	343	NA	NA	NA	NA	NA	NA	NA	NA	NA	188	196	200	103	103	NA	187	193	197	363	365	365	344	372	372	346	352	360	191	201	201	173	173	NA	220	220	222	154	154	168
2022-PLATE-11_2022-102_333-P3_Fam2_R2_03	8500 PSI	267	275	275	148	152	164	327	343	343	NA	NA	NA	NA	NA	NA	NA	NA	NA	188	188	196	103	115	115	187	193	197	359	363	365	344	372	372	352	360	360	191	197	201	173	173	175	220	222	222	154	154	168
2022-PLATE-11_2022-102_334-P3_Fam2_R2_04	8500 PSI	267	275	275	124	148	164	319	343	NA	216	224	NA	234	234	NA	NA	NA	NA	188	200	208	103	115	NA	187	187	NA	359	365	NA	336	344	NA	346	360	NA	197	201	NA	175	175	NA	220	222	NA	154	154	168
2022-PLATE-11_2022-102_335-P3_Fam2_R2_05	8500 PSI	267	275	275	124	148	148	327	343	343	NA	NA	NA	206	206	234	NA	NA	NA	188	196	200	103	115	115	187	193	197	359	365	365	344	372	372	352	360	360	197	197	201	173	175	175	220	220	222	154	154	168
2022-PLATE-11_2022-102_336-P3_Fam2_R2_06	8500 PSI	267	275	275	148	152	164	343	343	NA	224	224	NA	NA	NA	NA	140	140	NA	196	200	200	103	103	115	187	193	197	363	365	365	344	372	372	352	360	360	197	197	201	173	175	175	222	222	NA	154	154	168
2022-PLATE-11_2022-102_337-P3_Fam2_R2_07	8500 PSI	267	275	275	148	152	164	327	343	343	224	224	NA	206	206	234	140	140	144	188	196	200	103	103	115	187	193	197	359	363	365	344	372	372	346	352	360	191	201	201	175	175	NA	222	222	NA	154	154	156
2022-PLATE-11_2022-102_338-P3_Fam2_R2_08	8500 PSI	267	275	275	124	148	164	319	327	343	NA	NA	NA	206	238	242	140	140	144	188	200	208	103	115	115	NA	NA	NA	NA	NA	NA	336	344	372	346	360	360	NA	NA	NA	175	175	NA	220	222	222	NA	NA	NA
2022-PLATE-11_2022-102_339-P3_Fam2_R2_09	8500 PSI	275	275	283	124	148	164	319	327	343	NA	NA	NA	206	238	242	140	140	NA	188	196	200	103	115	115	187	187	193	359	363	365	336	344	372	352	352	360	197	197	NA	173	173	175	220	222	222	154	154	168
2022-PLATE-11_2022-102_340-P3_Fam2_R2_10	8500 PSI	267	275	275	148	152	164	327	343	343	224	224	NA	206	242	NA	140	140	144	188	196	200	103	103	NA	187	187	193	359	363	365	336	344	372	346	352	360	191	197	197	175	175	NA	222	222	NA	154	154	168
2022-PLATE-11_2022-102_341-P3_Fam2_R2_11	8500 PSI	267	275	275	148	152	164	319	327	343	NA	NA	NA	206	238	242	140	140	144	188	200	208	103	103	115	187	193	193	363	363	365	336	344	372	346	352	360	191	197	197	173	173	175	220	222	222	154	154	168
2022-PLATE-11_2022-102_342-P3_Fam2_R2_12	8500 PSI	267	275	275	148	152	164	319	327	343	NA	NA	NA	238	238	242	NA	NA	NA	188	188	196	103	115	115	NA	NA	NA	359	363	365	336	344	372	346	352	360	197	197	201	175	175	NA	220	222	222	154	154	168
2022-PLATE-11_2022-102_343-P3_Fam2_R2_13	8500 PSI	275	275	283	124	148	164	319	327	343	NA	NA	NA	206	238	242	140	140	NA	188	196	200	103	103	115	187	193	197	363	365	365	344	372	372	346	352	360	197	197	201	173	175	175	220	222	222	154	154	168
2022-PLATE-11_2022-102_344-P3_Fam2_R2_14	8500 PSI	275	283	NA	124	148	164	319	343	NA	224	224	NA	206	234	238	140	140	NA	188	188	208	103	115	NA	187	187	193	359	363	365	336	344	372	360	360	NA	197	201	NA	173	175	NA	220	222	222	154	154	156
2022-PLATE-11_2022-102_345-P3_Fam2_R2_15	8500 PSI	267	275	275	148	152	164	327	343	343	NA	NA	NA	206	238	242	140	140	144	188	196	200	103	115	115	187	193	197	363	365	365	344	372	372	346	352	360	191	197	201	175	175	NA	220	220	222	154	154	156
2022-PLATE-11_2022-102_346-P3_Fam3_R2_01	8500 PSI	275	275	283	148	152	164	315	319	339	NA	NA	NA	234	238	246	140	140	NA	192	208	224	103	115	115	187	193	195	359	359	NA	NA	NA	NA	NA	NA	NA	197	197	201	NA	NA	NA	NA	NA	NA	156	156	NA
2022-PLATE-11_2022-102_347-P3_Fam3_R2_02	8500 PSI	275	275	283	148	152	164	315	339	343	NA	NA	NA	242	246	246	140	140	144	192	196	224	103	115	115	187	195	195	359	359	NA	336	344	352	346	346	352	191	197	201	173	173	NA	220	220	222	156	156	NA
2022-PLATE-11_2022-102_348-P3_Fam3_R2_03	8500 PSI	267	275	275	124	148	164	315	319	339	NA	NA	NA	238	242	246	NA	NA	NA	208	224	224	NA	NA	NA	NA	NA	NA	359	359	NA	336	344	352	346	346	352	191	197	201	173	173	NA	220	220	222	156	156	168
2022-PLATE-11_2022-102_349-P3_Fam3_R2_04	8500 PSI	267	275	275	124	148	164	315	319	339	NA	NA	NA	234	238	246	140	140	NA	192	208	224	115	115	NA	187	193	195	359	359	NA	336	344	352	346	346	352	197	197	201	173	173	NA	220	220	222	156	156	NA
2022-PLATE-11_2022-102_350-P3_Fam3_R2_05	8500 PSI	275	275	283	148	152	164	315	339	343	NA	NA	NA	234	238	246	NA	NA	NA	192	196	224	103	115	115	193	195	197	359	359	NA	344	352	372	346	352	360	197	197	201	173	173	175	220	220	222	156	156	168
2022-PLATE-11_2022-102_351-P3_Fam3_R2_06	8500 PSI	267	275	275	124	148	164	315	339	343	NA	NA	NA	234	238	246	140	140	NA	192	196	224	103	115	115	187	195	195	359	359	NA	336	344	352	346	352	360	197	197	201	173	173	NA	220	220	222	156	156	168
2022-PLATE-11_2022-102_352-P3_Fam3_R2_07	8500 PSI	275	275	283	148	152	164	315	339	343	NA	NA	NA	238	242	246	140	140	144	192	192	196	103	115	115	193	195	197	359	359	365	344	352	372	346	346	352	191	197	201	173	173	175	220	220	222	156	156	NA
2022-PLATE-11_2022-102_353-P3_Fam3_R2_08	8500 PSI	267	275	275	148	152	164	315	339	343	NA	NA	NA	234	238	246	140	140	144	192	208	224	103	115	115	193	195	197	359	359	NA	344	352	372	346	346	352	191	197	201	173	173	175	220	220	222	156	156	168
2022-PLATE-11_2022-102_354-P3_Fam3_R2_09	8500 PSI	275	275	283	124	148	164	315	319	339	NA	NA	NA	238	242	246	140	140	144	196	224	224	NA	NA	NA	193	195	197	359	359	365	344	352	372	346	352	360	191	197	201	173	173	175	220	220	222	156	156	168
2022-PLATE-11_2022-102_355-P3_Fam3_R2_10	8500 PSI	275	275	283	124	148	164	315	319	339	224	244	244	234	238	246	140	140	NA	192	196	224	115	115	NA	195	195	197	359	359	NA	344	352	372	346	352	360	197	197	201	173	173	175	220	220	222	156	156	NA
2022-PLATE-11_2022-102_356-P3_Fam3_R2_11	8500 PSI	267	275	275	148	152	164	315	319	339	224	244	244	238	242	246	140	140	NA	192	196	224	103	115	115	193	195	197	359	359	365	344	352	372	346	352	360	197	201	201	173	173	NA	220	220	222	156	156	168
2022-PLATE-11_2022-102_357-P3_Fam3_R2_12	8500 PSI	267	275	275	124	148	164	315	339	343	NA	NA	NA	238	242	246	NA	NA	NA	192	196	224	NA	NA	NA	193	195	197	359	359	365	344	352	372	346	346	352	197	197	201	173	173	175	220	220	222	156	156	168
2022-PLATE-11_2022-102_358-P3_Fam3_R2_13	8500 PSI	275	275	283	124	148	164	315	319	339	NA	NA	NA	238	242	246	NA	NA	NA	192	196	224	115	115	NA	187	195	195	359	359	NA	336	344	352	346	352	360	197	197	201	173	173	175	220	220	222	156	156	168
2022-PLATE-11_2022-102_359-P3_Fam3_R2_14	8500 PSI	267	275	275	148	152	164	NA	NA	NA	224	244	244	NA	NA	NA	140	140	NA	NA	NA	NA	103	115	115	193	195	197	359	359	365	344	352	372	NA	NA	NA	197	197	201	173	173	NA	NA	NA	NA	156	156	NA
2022-PLATE-11_2022-102_360-P3_Fam3_R2_15	8500 PSI	NA	NA	NA	NA	NA	NA	NA	NA	NA	224	244	244	NA	NA	NA	140	140	144	192	196	224	115	115	NA	187	193	195	359	359	365	336	344	352	346	346	352	191	197	197	173	173	175	220	220	222	156	156	168
2022-PLATE-11_2022-102_361-9500P_Fam1_R1_01	9500 PSI	275	275	283	124	148	164	343	343	NA	NA	NA	NA	222	234	242	NA	NA	NA	200	200	208	103	115	115	187	197	197	363	363	365	336	364	372	346	346	360	191	197	201	173	173	175	220	222	226	156	168	168
2022-PLATE-11_2022-102_362-9500P_Fam1_R1_02	9500 PSI	275	283	NA	124	148	164	343	343	NA	224	244	249	NA	NA	NA	140	140	NA	200	200	208	115	115	NA	187	195	195	359	359	NA	336	372	372	346	346	NA	191	197	201	173	173	NA	NA	NA	NA	154	156	168
2022-PLATE-11_2022-102_363-9500P_Fam1_R1_03	9500 PSI	267	275	275	124	148	164	319	343	343	NA	NA	NA	NA	NA	NA	NA	NA	NA	196	200	200	103	115	115	187	197	197	359	363	363	336	364	372	346	346	NA	191	197	201	173	173	NA	220	222	226	154	156	168
2022-PLATE-11_2022-102_364-9500P_Fam1_R1_04	9500 PSI	279	279	283	124	148	164	343	343	NA	NA	NA	NA	222	234	234	140	140	144	196	200	200	NA	NA	NA	187	195	197	359	359	NA	336	364	372	346	346	360	191	191	201	173	173	175	220	222	226	154	156	168
2022-PLATE-11_2022-102_365-9500P_Fam1_R1_05	9500 PSI	275	275	283	148	152	164	319	343	343	NA	NA	NA	222	234	234	NA	NA	NA	200	200	208	115	115	NA	187	195	197	359	359	363	336	364	364	346	346	NA	191	197	201	173	173	175	220	222	226	156	168	168
2022-PLATE-11_2022-102_366-9500P_Fam1_R1_06	9500 PSI	267	275	275	124	148	164	319	343	343	NA	NA	NA	222	234	242	140	140	NA	NA	NA	NA	NA	NA	NA	NA	NA	NA	359	363	365	364	372	372	346	346	NA	191	197	201	173	173	175	220	222	226	168	168	NA
2022-PLATE-11_2022-102_367-9500P_Fam1_R1_07	9500 PSI	275	279	283	148	152	164	319	343	343	224	244	249	NA	NA	NA	140	140	144	196	200	200	115	115	NA	187	195	197	359	363	NA	336	364	372	346	346	NA	191	191	201	173	173	NA	220	222	226	154	156	168
2022-PLATE-11_2022-102_368-9500P_Fam1_R1_08	9500 PSI	275	279	283	148	152	164	343	343	NA	224	244	249	222	234	242	140	140	144	196	200	200	103	115	115	187	195	197	359	359	363	336	364	372	346	346	360	191	191	201	173	173	NA	220	222	226	156	168	168
2022-PLATE-11_2022-102_369-9500P_Fam1_R1_09	9500 PSI	275	279	283	124	148	164	343	343	NA	224	244	249	NA	NA	NA	140	140	144	NA	NA	NA	115	115	NA	187	195	197	359	363	365	336	364	372	346	346	NA	191	191	201	173	173	175	220	222	226	168	168	NA
2022-PLATE-11_2022-102_370-9500P_Fam1_R1_10	9500 PSI	267	279	279	124	148	164	319	343	343	224	244	249	NA	NA	NA	140	140	144	200	200	208	103	115	115	187	195	197	359	359	363	336	364	372	346	346	360	191	191	201	173	173	175	220	222	226	154	154	156
2022-PLATE-11_2022-102_371-9500P_Fam1_R1_11	9500 PSI	279	279	283	124	148	164	343	343	NA	224	244	249	222	234	234	140	140	NA	200	200	208	103	115	115	195	197	197	359	363	365	364	372	372	346	346	360	191	197	201	173	173	175	220	222	226	154	154	168
2022-PLATE-11_2022-102_372-9500P_Fam1_R1_12	9500 PSI	267	275	279	148	152	NA	343	343	NA	NA	NA	NA	NA	NA	NA	NA	NA	NA	196	200	NA	115	115	NA	195	197	NA	359	365	NA	364	372	NA	346	346	360	NA	NA	NA	173	173	NA	220	222	NA	154	168	168
2022-PLATE-11_2022-102_373-9500P_Fam1_R1_13	9500 PSI	275	275	283	148	152	164	343	343	NA	224	244	249	222	234	234	140	140	144	196	200	200	103	115	115	195	195	197	359	359	NA	364	372	372	346	346	360	191	191	201	173	173	NA	220	222	226	168	168	NA
2022-PLATE-11_2022-102_374-9500P_Fam1_R1_14	9500 PSI	275	275	283	124	148	164	319	343	343	224	244	249	222	234	242	140	140	NA	NA	NA	NA	NA	NA	NA	NA	NA	NA	359	359	365	372	372	NA	346	346	360	191	197	201	173	173	175	220	222	226	154	156	168
2022-PLATE-11_2022-102_375-9500P_Fam1_R1_15	9500 PSI	267	275	279	148	152	164	319	343	343	224	244	249	NA	NA	NA	140	140	144	196	200	200	115	115	NA	187	195	195	359	359	365	336	364	372	346	346	NA	191	191	201	173	173	NA	220	222	226	154	168	168
2022-PLATE-11_2022-102_376-9500P_Fam2_R1_01	9500 PSI	267	275	275	148	152	164	319	327	343	224	224	NA	NA	NA	NA	140	140	144	NA	NA	NA	103	115	115	NA	NA	NA	359	363	365	344	372	372	352	360	360	191	197	201	173	175	175	220	222	222	154	154	156
2022-PLATE-12_2022-102_377-9500P_Fam2_R1_02	9500 PSI	267	275	275	124	148	164	327	343	343	NA	NA	NA	206	234	238	NA	NA	NA	188	200	208	103	103	115	187	187	197	359	365	365	344	372	372	352	360	360	197	197	201	173	173	175	220	222	222	154	154	156
2022-PLATE-12_2022-102_378-9500P_Fam2_R1_03	9500 PSI	275	275	283	148	152	164	327	343	343	224	224	NA	206	238	242	NA	NA	NA	188	196	200	103	103	NA	187	193	197	363	365	365	344	372	372	346	352	360	197	197	201	175	175	NA	220	220	222	154	154	156
2022-PLATE-12_2022-102_379-9500P_Fam2_R1_04	9500 PSI	267	275	275	148	152	164	319	327	343	NA	NA	NA	206	234	238	140	140	NA	188	196	200	103	103	115	187	187	193	365	365	NA	336	344	372	352	352	360	197	197	201	173	173	NA	220	222	222	154	154	168
2022-PLATE-12_2022-102_380-9500P_Fam2_R1_05	9500 PSI	267	275	275	124	148	164	327	343	343	NA	NA	NA	206	234	238	140	140	144	188	196	200	103	115	115	187	193	197	365	365	NA	344	372	372	352	360	360	191	197	197	173	173	175	220	222	222	154	154	168
2022-PLATE-12_2022-102_381-9500P_Fam2_R1_06	9500 PSI	267	275	275	124	148	164	327	343	343	NA	NA	NA	206	238	242	140	140	144	188	200	208	103	115	115	187	193	197	363	365	365	344	372	372	352	360	360	191	197	201	175	175	NA	222	222	NA	154	154	156
2022-PLATE-12_2022-102_382-9500P_Fam2_R1_07	9500 PSI	275	275	283	124	148	164	319	327	343	NA	NA	NA	234	238	238	140	140	NA	188	200	208	103	103	115	187	187	NA	359	365	365	336	344	372	352	360	360	197	197	NA	173	175	175	220	222	222	154	154	168
2022-PLATE-12_2022-102_383-9500P_Fam2_R1_08	9500 PSI	267	275	275	124	148	164	327	343	343	NA	NA	NA	238	238	242	140	140	144	NA	NA	NA	NA	NA	NA	NA	NA	NA	365	365	NA	336	344	372	352	360	360	191	197	201	173	173	175	220	222	222	154	154	168
2022-PLATE-12_2022-102_384-9500P_Fam2_R1_09	9500 PSI	267	275	275	124	148	164	327	343	343	NA	NA	NA	238	238	242	140	140	144	188	196	200	103	115	115	187	193	197	359	363	365	344	372	372	346	352	360	191	197	201	173	173	NA	220	222	222	154	154	168
2022-PLATE-12_2022-102_385-9500P_Fam2_R1_10	9500 PSI	275	275	283	148	152	164	327	343	343	NA	NA	NA	206	234	238	NA	NA	NA	188	188	196	103	103	115	187	187	193	359	365	365	336	344	372	346	360	360	197	197	201	173	173	NA	220	220	222	154	154	168
2022-PLATE-12_2022-102_386-9500P_Fam2_R1_11	9500 PSI	267	275	275	124	148	164	327	343	343	NA	NA	NA	206	234	238	NA	NA	NA	188	196	200	103	103	115	187	187	193	363	365	365	336	344	372	346	352	360	197	197	201	173	175	175	220	222	222	154	154	156
2022-PLATE-12_2022-102_387-9500P_Fam2_R1_12	9500 PSI	267	275	279	148	152	164	327	343	343	NA	NA	NA	206	238	242	140	140	144	188	208	NA	103	115	115	187	193	197	363	365	365	344	372	372	346	360	360	191	197	201	175	175	NA	220	222	222	154	154	168
2022-PLATE-12_2022-102_388-9500P_Fam2_R1_13	9500 PSI	267	275	275	148	152	164	319	327	343	NA	NA	NA	206	238	242	NA	NA	NA	188	196	200	103	103	115	187	193	197	363	365	365	344	372	372	352	360	360	197	197	201	175	175	NA	222	222	NA	154	154	156
2022-PLATE-12_2022-102_389-9500P_Fam2_R1_14	9500 PSI	275	275	283	124	148	164	319	327	343	NA	NA	NA	206	234	238	NA	NA	NA	188	196	200	103	115	115	187	193	197	363	365	365	344	372	372	352	360	360	197	197	NA	173	173	NA	220	222	222	154	154	168
2022-PLATE-12_2022-102_390-9500P_Fam2_R1_15	9500 PSI	267	275	275	148	152	164	327	343	343	NA	NA	NA	206	234	238	NA	NA	NA	188	196	200	103	115	115	187	193	197	363	365	365	344	372	372	346	352	360	197	197	201	173	175	175	222	222	NA	154	154	168
2022-PLATE-12_2022-102_391-9500P_Fam3_R1_01	9500 PSI	267	275	275	124	148	164	315	319	339	NA	NA	NA	234	238	246	NA	NA	NA	192	196	224	115	115	NA	193	193	197	359	359	365	344	352	372	346	346	352	191	197	201	173	173	175	220	220	222	156	156	NA
2022-PLATE-12_2022-102_392-9500P_Fam3_R1_02	9500 PSI	267	275	275	148	152	164	315	339	343	224	244	244	238	242	246	140	140	NA	192	208	224	103	115	115	193	195	197	359	359	NA	344	352	372	346	352	352	197	197	NA	173	173	NA	220	220	222	156	156	NA
2022-PLATE-12_2022-102_393-9500P_Fam3_R1_03	9500 PSI	275	275	283	124	148	164	315	319	339	NA	NA	NA	238	242	246	NA	NA	NA	196	224	224	115	115	NA	193	195	197	359	359	365	344	352	372	346	346	352	197	197	201	173	173	NA	220	220	222	156	156	168
2022-PLATE-12_2022-102_394-9500P_Fam3_R1_04	9500 PSI	267	275	275	148	152	164	315	339	343	224	244	244	NA	NA	NA	140	140	NA	NA	NA	NA	103	115	115	NA	NA	NA	NA	NA	NA	344	352	372	NA	NA	NA	197	197	201	NA	NA	NA	NA	NA	NA	156	156	168
2022-PLATE-12_2022-102_395-9500P_Fam3_R1_05	9500 PSI	275	275	283	124	148	164	315	319	339	224	244	244	NA	NA	NA	140	140	NA	NA	NA	NA	115	115	NA	NA	NA	NA	NA	NA	NA	NA	NA	NA	NA	NA	NA	197	201	201	NA	NA	NA	NA	NA	NA	NA	NA	NA
2022-PLATE-12_2022-102_396-9500P_Fam3_R1_06	9500 PSI	275	275	283	148	152	164	315	339	343	224	244	244	238	242	246	140	140	NA	192	208	224	115	115	NA	187	193	195	NA	NA	NA	NA	NA	NA	NA	NA	NA	NA	NA	NA	NA	NA	NA	NA	NA	NA	NA	NA	NA
2022-PLATE-12_2022-102_397-9500P_Fam3_R1_07	9500 PSI	267	275	275	148	152	164	315	319	339	224	244	244	NA	NA	NA	140	140	144	NA	NA	NA	115	115	NA	NA	NA	NA	359	359	NA	336	344	352	NA	NA	NA	191	197	201	NA	NA	NA	NA	NA	NA	156	156	NA
2022-PLATE-12_2022-102_398-9500P_Fam3_R1_08	9500 PSI	267	275	275	148	152	164	315	339	343	224	244	244	234	238	246	140	140	NA	192	196	224	103	115	115	193	193	197	359	359	365	344	352	372	346	346	352	197	197	201	173	173	175	220	220	222	156	156	NA
2022-PLATE-12_2022-102_399-9500P_Fam3_R1_09	9500 PSI	267	275	275	124	148	164	315	319	339	NA	NA	NA	238	242	246	NA	NA	NA	196	224	224	115	115	NA	193	195	197	359	359	365	344	352	372	346	352	360	191	201	201	173	173	175	220	220	222	156	156	168
2022-PLATE-12_2022-102_400-9500P_Fam3_R1_10	9500 PSI	267	275	275	148	152	164	315	319	339	224	244	244	234	238	246	140	140	NA	192	196	224	103	115	115	187	193	195	359	359	NA	336	344	352	346	352	360	197	197	201	173	173	175	220	220	222	156	156	NA
2022-PLATE-12_2022-102_401-9500P_Fam3_R1_11	9500 PSI	267	275	275	148	152	164	315	319	339	NA	NA	NA	234	238	246	140	140	144	192	196	224	115	115	NA	187	193	195	359	359	365	336	344	352	346	346	352	191	197	201	173	173	175	220	220	222	156	156	168
2022-PLATE-12_2022-102_402-9500P_Fam3_R1_12	9500 PSI	275	275	283	124	148	164	315	339	343	NA	NA	NA	234	238	246	NA	NA	NA	192	208	224	103	115	115	195	195	197	359	359	365	352	352	372	346	352	360	191	197	201	173	173	NA	220	220	222	156	156	NA
2022-PLATE-12_2022-102_403-9500P_Fam3_R1_13	9500 PSI	275	275	283	124	148	164	315	339	343	NA	NA	NA	238	242	246	NA	NA	NA	192	196	224	115	115	NA	193	195	197	359	359	NA	344	352	372	346	352	360	197	197	NA	173	173	175	220	220	222	156	156	NA
2022-PLATE-12_2022-102_404-9500P_Fam3_R1_14	9500 PSI	275	275	283	148	152	164	315	319	339	224	244	244	234	238	246	140	140	NA	192	192	208	115	115	NA	187	193	193	359	359	365	336	344	352	346	346	352	197	201	201	173	173	175	220	220	222	156	156	168
2022-PLATE-12_2022-102_405-9500P_Fam3_R1_15	9500 PSI	267	275	275	124	148	164	315	319	339	NA	NA	NA	234	238	246	140	140	144	192	196	224	115	115	NA	187	193	193	359	359	365	336	344	352	346	352	360	191	201	201	173	173	NA	220	220	222	156	156	168
2022-PLATE-12_2022-102_406-9500P_Fam1_R2_01	9500 PSI	275	279	283	152	164	164	343	343	NA	224	244	249	222	234	242	140	140	144	196	200	200	115	115	NA	187	195	197	359	359	363	336	364	372	346	346	NA	191	191	201	173	173	175	222	226	226	154	168	168
2022-PLATE-12_2022-102_407-9500P_Fam1_R2_02	9500 PSI	279	279	283	148	152	164	319	343	343	224	244	249	222	234	234	140	140	NA	200	200	208	103	115	115	187	195	197	359	359	363	336	364	372	346	346	360	191	197	201	173	173	175	220	222	226	154	156	168
2022-PLATE-12_2022-102_408-9500P_Fam1_R2_03	9500 PSI	267	275	279	124	148	164	343	343	NA	224	244	249	222	234	242	140	140	NA	200	200	208	115	115	NA	195	197	197	359	363	365	364	372	372	346	346	NA	191	197	201	173	173	175	220	222	226	154	156	168
2022-PLATE-12_2022-102_409-9500P_Fam1_R2_04	9500 PSI	267	275	279	124	148	164	335	343	343	224	244	249	222	234	242	140	140	144	200	200	208	103	115	115	187	195	197	359	359	363	336	364	372	346	346	NA	191	191	201	173	173	175	220	222	226	154	168	168
2022-PLATE-12_2022-102_410-9500P_Fam1_R2_05	9500 PSI	275	275	283	124	148	164	343	343	NA	224	244	249	NA	NA	NA	140	140	144	NA	NA	NA	103	115	115	195	197	197	359	363	365	364	372	372	346	346	360	191	191	201	173	173	NA	220	222	226	154	156	168
2022-PLATE-12_2022-102_411-9500P_Fam1_R2_06	9500 PSI	275	279	283	124	148	164	343	343	NA	NA	NA	NA	NA	NA	NA	140	140	NA	NA	NA	NA	NA	NA	NA	NA	NA	NA	NA	NA	NA	NA	NA	NA	NA	NA	NA	NA	NA	NA	NA	NA	NA	NA	NA	NA	NA	NA	NA
2022-PLATE-12_2022-102_412-9500P_Fam1_R2_07	9500 PSI	267	275	279	148	152	164	319	343	343	NA	NA	NA	222	234	234	NA	NA	NA	200	200	208	115	115	NA	195	197	197	359	363	365	364	372	372	346	346	NA	191	197	201	173	173	175	220	220	222	154	156	168
2022-PLATE-12_2022-102_413-9500P_Fam1_R2_08	9500 PSI	275	275	283	148	152	164	343	343	NA	224	244	249	222	234	242	140	140	144	200	200	208	115	115	NA	187	195	197	359	359	363	336	364	372	346	346	360	191	191	201	173	173	NA	220	222	226	154	156	168
2022-PLATE-12_2022-102_414-9500P_Fam1_R2_09	9500 PSI	275	279	283	124	164	164	319	343	343	224	244	249	222	234	234	140	140	144	200	200	208	103	115	115	195	197	197	359	363	365	364	372	372	346	346	360	191	191	201	173	173	175	220	222	226	154	168	168
2022-PLATE-12_2022-102_415-9500P_Fam1_R2_10	9500 PSI	267	279	279	148	152	164	319	343	343	224	244	249	222	234	234	NA	NA	NA	200	200	208	103	115	115	187	195	197	359	359	363	336	364	372	346	346	NA	191	197	201	173	173	NA	220	222	226	154	154	156
2022-PLATE-12_2022-102_416-9500P_Fam1_R2_11	9500 PSI	267	275	279	124	148	164	319	343	343	224	244	249	222	234	234	140	140	NA	200	200	208	115	115	NA	187	195	197	359	359	363	336	364	372	346	346	NA	191	197	201	173	173	NA	220	222	226	154	168	168
2022-PLATE-12_2022-102_417-9500P_Fam1_R2_12	9500 PSI	267	275	279	124	148	164	319	343	343	224	244	249	222	234	242	140	140	NA	200	200	208	115	115	NA	187	197	197	359	363	363	336	364	364	346	346	360	191	197	201	173	173	175	220	222	226	154	156	168
2022-PLATE-12_2022-102_418-9500P_Fam1_R2_13	9500 PSI	267	279	279	124	148	164	319	343	343	224	244	249	NA	NA	NA	140	140	144	NA	NA	NA	115	115	NA	NA	NA	NA	359	359	363	336	364	372	NA	NA	NA	191	191	201	NA	NA	NA	NA	NA	NA	154	154	156
2022-PLATE-12_2022-102_419-9500P_Fam1_R2_14	9500 PSI	275	279	283	148	152	164	319	343	343	224	244	249	222	234	234	140	140	144	200	200	208	115	115	NA	195	197	197	359	363	365	364	372	372	346	346	NA	191	191	201	173	173	NA	220	222	226	154	168	168
2022-PLATE-12_2022-102_420-9500P_Fam1_R2_15	9500 PSI	275	279	283	124	148	164	343	343	NA	224	244	249	222	234	242	NA	NA	NA	196	200	200	115	115	NA	187	195	197	359	359	363	336	364	372	346	346	NA	191	197	201	173	173	NA	222	226	226	154	154	168
2022-PLATE-12_2022-102_421-9500P_Fam2_R2_01	9500 PSI	275	275	283	148	152	164	319	327	343	NA	NA	NA	238	238	242	140	140	NA	188	196	200	103	115	115	187	187	193	359	363	365	336	344	372	346	352	NA	197	197	NA	175	175	NA	220	222	222	154	154	168
2022-PLATE-12_2022-102_422-9500P_Fam2_R2_02	9500 PSI	275	275	283	124	148	164	327	343	343	NA	NA	NA	206	234	238	140	140	NA	188	196	200	103	103	115	187	193	197	363	365	365	344	372	372	346	352	360	197	197	201	173	175	175	220	222	222	154	154	156
2022-PLATE-12_2022-102_423-9500P_Fam2_R2_03	9500 PSI	267	275	275	148	152	164	327	343	343	NA	NA	NA	206	238	242	140	140	144	188	196	NA	103	115	115	187	187	193	359	365	365	336	344	372	352	360	360	191	197	201	175	175	NA	220	222	222	154	154	156
2022-PLATE-12_2022-102_424-9500P_Fam2_R2_04	9500 PSI	275	275	283	124	148	148	327	343	343	NA	NA	NA	206	234	238	NA	NA	NA	188	200	208	103	103	NA	187	193	197	363	365	365	344	372	372	352	360	360	197	201	201	173	173	175	222	222	NA	154	154	168
2022-PLATE-12_2022-102_425-9500P_Fam2_R2_05	9500 PSI	267	275	275	148	152	164	319	327	343	NA	NA	NA	206	234	238	140	140	144	188	200	208	115	115	NA	187	187	NA	359	365	365	336	344	372	352	360	360	191	197	197	175	175	NA	222	222	NA	154	154	156
2022-PLATE-12_2022-102_426-9500P_Fam2_R2_06	9500 PSI	267	275	275	152	164	164	327	343	343	NA	NA	NA	206	238	242	NA	NA	NA	196	200	200	103	103	115	187	187	193	359	365	365	336	344	372	360	360	NA	191	201	201	173	175	175	222	222	NA	154	154	156
2022-PLATE-12_2022-102_427-9500P_Fam2_R2_07	9500 PSI	275	275	283	148	152	164	319	327	343	NA	NA	NA	206	234	238	140	140	144	188	196	200	103	103	115	187	187	193	363	365	365	336	344	344	352	352	360	191	197	201	173	173	NA	220	222	222	154	154	168
2022-PLATE-12_2022-102_428-9500P_Fam2_R2_08	9500 PSI	267	275	275	124	148	NA	343	343	NA	NA	NA	NA	238	242	NA	NA	NA	NA	188	196	200	103	115	NA	193	197	NA	363	365	NA	344	372	NA	360	360	NA	197	201	NA	175	175	NA	220	222	NA	154	168	NA
2022-PLATE-12_2022-102_429-9500P_Fam2_R2_09	9500 PSI	267	275	275	124	148	NA	327	343	NA	NA	NA	NA	206	206	234	140	140	144	188	196	200	103	103	115	187	187	193	359	363	365	336	344	372	352	360	NA	191	197	201	173	175	NA	220	222	222	154	154	156
2022-PLATE-12_2022-102_430-9500P_Fam2_R2_10	9500 PSI	275	275	283	148	152	164	327	327	343	NA	NA	NA	206	234	238	140	144	NA	188	196	NA	115	115	NA	187	187	193	359	363	365	336	344	372	352	360	360	191	201	NA	173	173	NA	222	222	NA	154	154	156
2022-PLATE-12_2022-102_431-9500P_Fam2_R2_11	9500 PSI	267	275	275	148	148	152	327	343	343	224	224	NA	234	238	238	140	140	144	200	200	208	103	115	115	187	187	197	365	365	NA	344	372	372	352	352	360	191	197	201	173	173	NA	220	222	222	154	154	168
2022-PLATE-12_2022-102_432-9500P_Fam2_R2_12	9500 PSI	275	275	283	124	148	164	319	327	343	NA	NA	NA	206	234	238	NA	NA	NA	188	188	208	103	103	115	187	193	193	359	363	363	336	344	372	346	352	360	197	197	NA	173	173	NA	220	222	222	154	154	156
2022-PLATE-12_2022-102_433-9500P_Fam2_R2_13	9500 PSI	267	275	275	124	148	164	327	343	343	NA	NA	NA	206	234	238	NA	NA	NA	188	200	208	103	115	115	187	187	197	365	365	NA	344	372	372	346	352	360	197	197	201	175	175	NA	220	222	222	154	154	168
2022-PLATE-12_2022-102_434-9500P_Fam2_R2_14	9500 PSI	275	275	283	124	148	164	319	327	NA	NA	NA	NA	206	234	238	140	140	144	188	196	200	103	103	115	187	193	193	359	363	363	336	344	372	360	360	NA	191	197	201	173	175	175	222	222	NA	154	154	156
2022-PLATE-12_2022-102_435-9500P_Fam2_R2_15	9500 PSI	267	275	275	124	148	164	327	343	343	NA	NA	NA	206	238	242	140	140	144	188	196	200	103	103	NA	187	187	193	359	363	365	336	344	372	346	352	360	191	197	201	173	175	175	220	222	222	154	154	168
2022-PLATE-12_2022-102_436-9500P_Fam3_R2_01	9500 PSI	275	275	283	148	152	164	315	319	339	224	244	244	NA	NA	NA	140	140	144	NA	NA	NA	115	115	NA	187	193	193	NA	NA	NA	336	344	344	346	352	352	191	197	201	173	173	NA	220	220	222	156	156	NA
2022-PLATE-12_2022-102_437-9500P_Fam3_R2_02	9500 PSI	267	275	275	NA	NA	NA	NA	NA	NA	NA	NA	NA	NA	NA	NA	NA	NA	NA	NA	NA	NA	NA	NA	NA	NA	NA	NA	NA	NA	NA	NA	NA	NA	NA	NA	NA	NA	NA	NA	NA	NA	NA	NA	NA	NA	NA	NA	NA
2022-PLATE-12_2022-102_438-9500P_Fam3_R2_03	9500 PSI	275	275	283	124	148	164	315	319	339	224	244	244	234	238	246	140	140	144	192	208	224	103	115	115	187	193	195	359	359	NA	336	344	352	346	352	360	191	197	201	173	173	175	220	220	222	156	156	168
2022-PLATE-12_2022-102_439-9500P_Fam3_R2_04	9500 PSI	267	275	275	124	148	164	315	339	343	NA	NA	NA	238	242	246	140	140	144	192	196	224	115	115	NA	187	193	195	359	359	NA	336	344	352	346	352	360	191	197	201	173	173	175	220	220	222	156	156	168
2022-PLATE-12_2022-102_440-9500P_Fam3_R2_05	9500 PSI	275	275	283	124	148	164	315	339	343	NA	NA	NA	234	238	246	140	140	144	192	208	224	115	115	NA	193	195	197	359	359	365	344	352	372	346	352	360	191	197	201	173	173	175	220	220	222	156	156	NA
2022-PLATE-12_2022-102_441-9500P_Fam3_R2_06	9500 PSI	267	275	275	148	152	164	315	339	343	224	244	244	234	238	246	140	140	144	192	208	224	115	115	NA	195	195	197	359	359	NA	344	352	372	346	346	352	191	197	201	173	173	175	220	220	222	156	156	NA
2022-PLATE-12_2022-102_442-9500P_Fam3_R2_07	9500 PSI	275	275	283	148	152	164	315	339	343	224	244	244	234	238	246	140	140	NA	192	196	224	115	115	NA	187	193	195	359	359	365	336	344	352	346	346	352	197	197	201	173	173	NA	220	220	222	156	156	168
2022-PLATE-12_2022-102_443-9500P_Fam3_R2_08	9500 PSI	275	275	283	148	152	164	315	319	339	NA	NA	NA	234	238	246	140	140	144	196	224	224	115	115	NA	187	193	195	359	359	NA	336	344	352	346	352	360	191	197	201	173	173	175	220	220	222	156	156	168
2022-PLATE-12_2022-102_444-9500P_Fam3_R2_09	9500 PSI	267	275	275	124	148	164	315	339	343	NA	NA	NA	238	242	246	NA	NA	NA	192	208	224	115	115	NA	195	195	197	359	359	365	344	352	372	346	352	360	191	197	201	173	173	NA	220	220	222	156	156	NA
2022-PLATE-12_2022-102_445-9500P_Fam3_R2_10	9500 PSI	267	275	275	124	148	164	315	339	343	NA	NA	NA	238	242	246	140	140	144	192	208	224	115	115	NA	187	193	195	359	359	NA	336	344	352	346	352	360	191	197	201	173	173	NA	220	220	222	156	156	168
2022-PLATE-12_2022-102_446-9500P_Fam3_R2_11	9500 PSI	275	275	283	148	152	164	315	319	339	NA	NA	NA	234	238	246	NA	NA	NA	192	208	224	115	115	NA	193	193	197	359	359	NA	344	352	372	346	352	360	191	201	201	173	173	NA	220	220	222	156	156	168
2022-PLATE-12_2022-102_447-9500P_Fam3_R2_12	9500 PSI	275	275	283	124	148	164	315	339	343	NA	NA	NA	234	238	246	140	140	NA	192	196	224	103	115	115	193	195	197	359	359	NA	344	352	372	346	346	352	197	197	201	173	173	NA	220	220	222	156	156	NA
2022-PLATE-12_2022-102_448-9500P_Fam3_R2_13	9500 PSI	275	275	283	148	152	164	315	319	339	NA	NA	NA	238	242	246	NA	NA	NA	192	196	224	115	115	NA	187	193	195	359	359	NA	336	344	352	346	346	352	197	197	201	173	173	NA	220	220	222	156	156	NA
2022-PLATE-12_2022-102_449-9500P_Fam3_R2_14	9500 PSI	267	275	275	124	148	164	315	319	339	NA	NA	NA	234	238	246	NA	NA	NA	192	208	224	103	115	115	193	193	197	359	359	365	344	352	372	346	346	352	197	197	201	173	173	175	220	220	222	156	156	NA
2022-PLATE-12_2022-102_450-9500P_Fam3_R2_15	9500 PSI	275	275	283	124	148	164	315	319	339	NA	NA	NA	234	238	246	NA	NA	NA	192	196	224	115	115	NA	195	195	197	359	359	365	344	352	372	346	352	360	197	197	201	173	173	175	220	220	222	156	156	168
[truncated: 12 more columns]

## Sheet: Experiment 1_parr
Sample_Name	treatment	SSsp2201_allele1	SSsp2201_allele2	SSsp2201_allele3	SSsp2210_allele1	SSsp2210_allele2	SSsp2210_allele3	SsaD157_allele1	SsaD157_allele2	SsaD157_allele3	Sp1605_allele1	Sp1605_allele2	Sp1605_allele3	Sp2216_allele1	Sp2216_allele2	Sp2216_allele3	Ssa14_allele1	Ssa14_allele2	Ssa14_allele3	Ssa197_allele1	Ssa197_allele2	Ssa197_allele3	SsaF43_allele1	SsaF43_allele2	SsaF43_allele3	SsOsl85_allele1	SsOsl85_allele2	SsOsl85_allele3	EST107_allele1	EST107_allele2	EST107_allele3	EST19_allele1	EST19_allele2	EST19_allele3	EST28_allele1	EST28_allele2	EST28_allele3	EST68_allele1	EST68_allele2	EST68_allele3	Sleel53_allele1	Sleel53_allele2	Sleel53_allele3	Sleen82_allele1	Sleen82_allele2	Sleen82_allele3	SsOSL25_allele1	SsOSL25_allele2	SsOSL25_allele3
2023-PLATE-47_2022-2345_1-Pressure_0PSI_R1_001	0 PSI	275	283	NA	124	164	NA	319	327	NA	224	224	NA	206	234	NA	140	140	NA	200	208	NA	103	115	NA	187	187	NA	359	365	NA	336	344	NA	346	360	NA	197	201	NA	173	175	NA	222	222	NA	154	156	NA
2023-PLATE-47_2022-2345_10-Pressure_0PSI_R1_010	0 PSI	267	275	NA	152	164	NA	319	327	NA	224	224	NA	234	238	NA	140	140	NA	200	208	NA	103	115	NA	187	193	NA	359	365	NA	336	344	NA	346	352	NA	197	197	NA	173	173	NA	222	222	NA	154	156	NA
2023-PLATE-47_2022-2345_11-Pressure_0PSI_R1_011	0 PSI	267	275	NA	152	164	NA	319	327	NA	224	224	NA	206	242	NA	140	144	NA	196	200	NA	103	115	NA	187	197	NA	365	365	NA	344	372	NA	360	360	NA	191	197	NA	175	175	NA	220	222	NA	154	168	NA
2023-PLATE-47_2022-2345_12-Pressure_0PSI_R1_012	0 PSI	275	283	NA	124	164	NA	343	343	NA	224	224	NA	206	242	NA	140	140	NA	188	208	NA	103	103	NA	187	193	NA	359	363	NA	336	344	NA	346	352	NA	197	197	NA	173	173	NA	220	222	NA	154	156	NA
2023-PLATE-47_2022-2345_13-Pressure_0PSI_R1_013	0 PSI	275	283	NA	148	152	NA	319	339	NA	224	244	NA	234	246	NA	140	140	NA	196	224	NA	103	115	NA	195	197	NA	359	365	NA	352	372	NA	346	346	NA	197	201	NA	173	175	NA	220	222	NA	156	168	NA
2023-PLATE-47_2022-2345_14-Pressure_0PSI_R1_014	0 PSI	267	275	NA	124	148	NA	339	343	NA	224	244	NA	234	238	NA	140	144	NA	192	208	NA	103	115	NA	187	193	NA	359	365	NA	336	344	NA	352	360	NA	191	201	NA	173	173	NA	220	222	NA	156	168	NA
2023-PLATE-47_2022-2345_15-Pressure_0PSI_R1_015	0 PSI	267	275	NA	124	148	NA	319	339	NA	224	244	NA	234	246	NA	140	144	NA	196	224	NA	103	115	NA	195	197	NA	359	365	NA	352	372	NA	346	360	NA	191	197	NA	173	173	NA	220	222	NA	156	156	NA
2023-PLATE-47_2022-2345_16-Pressure_0PSI_R1_016	0 PSI	275	283	NA	148	152	NA	319	339	NA	224	244	NA	238	242	NA	140	140	NA	192	208	NA	103	115	NA	195	197	NA	359	359	NA	344	372	NA	346	360	NA	197	197	NA	173	175	NA	220	222	NA	156	168	NA
2023-PLATE-47_2022-2345_17-Pressure_0PSI_R1_017	0 PSI	267	279	NA	124	164	NA	343	343	NA	224	244	NA	234	242	NA	140	144	NA	200	208	NA	115	115	NA	187	195	NA	359	359	NA	336	364	NA	346	346	NA	191	201	NA	173	175	NA	222	226	NA	168	168	NA
2023-PLATE-47_2022-2345_18-Pressure_0PSI_R1_018	0 PSI	267	275	NA	148	152	NA	343	343	NA	224	224	NA	206	234	NA	140	144	NA	200	208	NA	103	103	NA	187	187	NA	359	365	NA	336	344	NA	352	360	NA	191	201	NA	173	173	NA	222	222	NA	154	168	NA
2023-PLATE-47_2022-2345_19-Pressure_0PSI_R1_019	0 PSI	267	275	NA	124	164	NA	343	343	NA	224	224	NA	234	238	NA	140	140	NA	188	196	NA	103	115	NA	187	187	NA	359	365	NA	336	372	NA	346	352	NA	197	201	NA	173	173	NA	222	222	NA	154	156	NA
2023-PLATE-47_2022-2345_2-Pressure_0PSI_R1_002	0 PSI	267	279	NA	148	152	NA	343	343	NA	224	249	NA	234	242	NA	140	144	NA	200	208	NA	115	115	NA	197	197	NA	359	363	NA	364	372	NA	346	346	NA	191	191	NA	173	173	NA	222	226	NA	168	168	NA
2023-PLATE-47_2022-2345_20-Pressure_0PSI_R1_020	0 PSI	275	283	NA	124	164	NA	319	343	NA	224	244	NA	222	242	NA	140	144	NA	200	208	NA	103	115	NA	187	195	NA	359	359	NA	336	364	NA	346	360	NA	191	201	NA	173	173	NA	222	226	NA	156	168	NA
2023-PLATE-47_2022-2345_21-Pressure_0PSI_R1_021	0 PSI	275	283	NA	124	148	NA	343	343	NA	224	224	NA	234	238	NA	140	144	NA	200	208	NA	103	115	NA	187	193	NA	359	365	NA	336	344	NA	360	360	NA	191	197	NA	175	175	NA	220	222	NA	154	156	NA
2023-PLATE-47_2022-2345_22-Pressure_0PSI_R1_022	0 PSI	275	283	NA	124	164	NA	319	343	NA	224	244	NA	234	242	NA	140	144	NA	200	208	NA	103	115	NA	187	197	NA	359	363	NA	336	364	NA	346	346	NA	191	201	NA	173	173	NA	220	222	NA	154	168	NA
2023-PLATE-47_2022-2345_23-Pressure_0PSI_R1_023	0 PSI	275	283	NA	124	148	NA	343	343	NA	224	244	NA	222	242	NA	140	144	NA	200	208	NA	115	115	NA	195	197	NA	359	365	NA	372	372	NA	346	360	NA	191	201	NA	173	175	NA	220	222	NA	168	168	NA
2023-PLATE-47_2022-2345_24-Pressure_0PSI_R1_024	0 PSI	267	275	NA	124	164	NA	343	343	NA	224	224	NA	206	242	NA	140	140	NA	188	208	NA	103	115	NA	187	197	NA	363	365	NA	372	372	NA	352	360	NA	197	201	NA	173	175	NA	222	222	NA	154	156	NA
2023-PLATE-47_2022-2345_25-Pressure_0PSI_R1_025	0 PSI	275	283	NA	124	164	NA	339	343	NA	224	244	NA	238	242	NA	140	144	NA	192	208	NA	115	115	NA	195	197	NA	359	359	NA	344	372	NA	346	346	NA	191	197	NA	173	173	NA	220	222	NA	156	156	NA
2023-PLATE-47_2022-2345_26-Pressure_0PSI_R1_026	0 PSI	267	275	NA	124	148	NA	343	343	NA	224	224	NA	234	238	NA	140	144	NA	200	208	NA	103	115	NA	187	193	NA	363	365	NA	336	372	NA	346	360	NA	191	201	NA	173	175	NA	222	222	NA	154	156	NA
2023-PLATE-47_2022-2345_27-Pressure_0PSI_R1_027	0 PSI	275	283	NA	152	164	NA	343	343	NA	224	224	NA	206	234	NA	140	144	NA	196	200	NA	115	115	NA	193	197	NA	365	365	NA	344	372	NA	352	360	NA	191	201	NA	173	175	NA	220	222	NA	154	156	NA
2023-PLATE-47_2022-2345_28-Pressure_0PSI_R1_028	0 PSI	275	283	NA	124	164	NA	319	327	NA	224	224	NA	234	238	NA	140	144	NA	196	200	NA	103	115	NA	187	187	NA	359	365	NA	336	372	NA	360	360	NA	191	197	NA	173	175	NA	220	222	NA	154	168	NA
2023-PLATE-47_2022-2345_29-Pressure_0PSI_R1_029	0 PSI	267	275	NA	124	164	NA	315	319	NA	224	244	NA	242	246	NA	140	140	NA	192	208	NA	115	115	NA	187	195	NA	359	359	NA	336	352	NA	346	352	NA	197	197	NA	173	175	NA	220	222	NA	156	168	NA
2023-PLATE-47_2022-2345_3-Pressure_0PSI_R1_003	0 PSI	275	283	NA	124	148	NA	319	343	NA	224	224	NA	234	238	NA	140	144	NA	200	208	NA	103	115	NA	187	187	NA	359	365	NA	336	372	NA	352	360	NA	191	197	NA	173	175	NA	222	222	NA	154	168	NA
2023-PLATE-47_2022-2345_30-Pressure_0PSI_R1_030	0 PSI	279	283	NA	148	152	NA	319	343	NA	224	244	NA	234	242	NA	140	140	NA	196	200	NA	115	115	NA	197	197	NA	359	365	NA	364	372	NA	346	360	NA	191	197	NA	173	175	NA	222	226	NA	168	168	NA
2023-PLATE-47_2022-2345_31-Pressure_0PSI_R1_031	0 PSI	267	279	NA	124	148	NA	343	343	NA	224	244	NA	234	234	NA	140	144	NA	196	200	NA	103	115	NA	187	195	NA	359	365	NA	336	364	NA	346	360	NA	191	201	NA	173	173	NA	220	222	NA	154	156	NA
2023-PLATE-47_2022-2345_32-Pressure_0PSI_R1_032	0 PSI	275	283	NA	124	164	NA	319	343	NA	NA	NA	NA	206	242	NA	140	140	NA	188	196	NA	103	115	NA	187	197	NA	359	365	NA	372	372	NA	360	360	NA	197	201	NA	175	175	NA	220	222	NA	154	168	NA
2023-PLATE-47_2022-2345_33-Pressure_0PSI_R1_033	0 PSI	275	283	NA	124	164	NA	343	343	NA	224	249	NA	234	242	NA	140	140	NA	200	208	NA	103	115	NA	187	197	NA	359	363	NA	336	372	NA	346	360	NA	197	201	NA	173	175	NA	220	222	NA	156	168	NA
2023-PLATE-47_2022-2345_34-Pressure_0PSI_R1_034	0 PSI	279	283	NA	124	164	NA	343	343	NA	224	249	NA	234	242	NA	140	144	NA	196	200	NA	103	115	NA	187	197	NA	359	359	NA	336	364	NA	346	346	NA	191	201	NA	173	175	NA	220	222	NA	154	156	NA
2023-PLATE-47_2022-2345_35-Pressure_0PSI_R1_035	0 PSI	275	283	NA	124	148	NA	315	319	NA	224	244	NA	242	246	NA	140	140	NA	192	196	NA	103	115	NA	187	195	NA	359	359	NA	336	352	NA	346	346	NA	197	197	NA	173	173	NA	220	222	NA	156	168	NA
2023-PLATE-47_2022-2345_36-Pressure_0PSI_R1_036	0 PSI	267	279	NA	148	152	NA	343	343	NA	224	249	NA	222	234	NA	140	144	NA	200	208	NA	115	115	NA	187	197	NA	359	363	NA	336	364	NA	346	360	NA	191	191	NA	173	173	NA	220	222	NA	154	168	NA
2023-PLATE-47_2022-2345_37-Pressure_0PSI_R1_037	0 PSI	275	283	NA	152	164	NA	319	343	NA	224	224	NA	238	242	NA	140	144	NA	200	208	NA	115	115	NA	187	197	NA	365	365	NA	372	372	NA	360	360	NA	191	201	NA	173	175	NA	222	222	NA	154	156	NA
2023-PLATE-47_2022-2345_38-Pressure_0PSI_R1_038	0 PSI	267	275	NA	148	152	NA	315	343	NA	224	244	NA	234	246	NA	140	144	NA	192	196	NA	115	115	NA	195	197	NA	359	359	NA	344	372	NA	346	346	NA	191	201	NA	173	173	NA	220	222	NA	156	168	NA
2023-PLATE-47_2022-2345_39-Pressure_0PSI_R1_039	0 PSI	275	283	NA	124	148	NA	343	343	NA	224	224	NA	206	234	NA	140	140	NA	200	208	NA	103	103	NA	193	197	NA	363	365	NA	344	372	NA	360	360	NA	197	201	NA	173	173	NA	222	222	NA	154	168	NA
2023-PLATE-47_2022-2345_4-Pressure_0PSI_R1_004	0 PSI	267	275	NA	124	148	NA	319	343	NA	224	249	NA	234	234	NA	140	144	NA	200	208	NA	115	115	NA	187	197	NA	363	365	NA	336	364	NA	346	346	NA	NA	NA	NA	173	173	NA	222	226	NA	154	156	NA
2023-PLATE-47_2022-2345_40-Pressure_0PSI_R1_040	0 PSI	267	275	NA	124	148	NA	343	343	NA	224	249	NA	222	242	NA	140	140	NA	200	208	NA	103	115	NA	197	197	NA	363	365	NA	372	372	NA	346	346	NA	197	201	NA	173	173	NA	222	226	NA	154	168	NA
2023-PLATE-47_2022-2345_41-Pressure_0PSI_R1_041	0 PSI	275	283	NA	148	152	NA	319	343	NA	224	249	NA	234	242	NA	140	144	NA	200	208	NA	115	115	NA	187	197	NA	359	363	NA	336	364	NA	346	346	NA	191	191	NA	173	175	NA	220	222	NA	154	156	NA
2023-PLATE-47_2022-2345_42-Pressure_0PSI_R1_042	0 PSI	275	283	NA	124	148	NA	343	343	NA	224	224	NA	206	234	NA	140	144	NA	188	208	NA	103	115	NA	187	193	NA	359	363	NA	336	372	NA	346	360	NA	191	197	NA	173	175	NA	222	222	NA	154	156	NA
2023-PLATE-47_2022-2345_43-Pressure_0PSI_R1_043	0 PSI	267	275	NA	124	148	NA	319	327	NA	NA	NA	NA	206	242	NA	140	144	NA	188	208	NA	115	115	NA	187	187	NA	359	365	NA	336	372	NA	360	360	NA	191	201	NA	175	175	NA	220	222	NA	154	156	NA
2023-PLATE-47_2022-2345_44-Pressure_0PSI_R1_044	0 PSI	267	275	NA	152	164	NA	343	343	NA	NA	NA	NA	206	234	NA	140	140	NA	196	200	NA	103	115	NA	187	197	NA	359	363	NA	372	372	NA	360	360	NA	197	197	NA	173	175	NA	222	222	NA	154	168	NA
2023-PLATE-47_2022-2345_45-Pressure_0PSI_R1_045	0 PSI	267	275	NA	124	164	NA	339	343	NA	224	244	NA	234	238	NA	140	144	NA	208	224	NA	103	115	NA	187	193	NA	359	365	NA	336	352	NA	346	360	NA	NA	NA	NA	173	175	NA	220	222	NA	156	156	NA
2023-PLATE-47_2022-2345_46-Pressure_0PSI_R1_046	0 PSI	275	283	NA	152	164	NA	343	343	NA	224	244	NA	222	234	NA	140	144	NA	196	200	NA	103	115	NA	187	195	NA	359	365	NA	336	372	NA	346	360	NA	191	191	NA	173	175	NA	222	226	NA	168	168	NA
2023-PLATE-47_2022-2345_47-Pressure_0PSI_R1_047	0 PSI	275	283	NA	124	164	NA	315	319	NA	224	244	NA	238	242	NA	140	144	NA	192	208	NA	115	115	NA	193	197	NA	359	365	NA	344	372	NA	346	360	NA	191	201	NA	173	175	NA	220	222	NA	156	168	NA
2023-PLATE-47_2022-2345_48-Pressure_0PSI_R1_048	0 PSI	267	275	NA	148	152	NA	315	343	NA	224	244	NA	242	246	NA	140	140	NA	208	224	NA	115	115	NA	195	197	NA	359	365	NA	352	372	NA	346	352	NA	197	201	NA	173	173	NA	220	222	NA	156	168	NA
2023-PLATE-47_2022-2345_49-Pressure_0PSI_R1_049	0 PSI	267	275	NA	124	148	NA	339	343	NA	224	244	NA	242	246	NA	140	140	NA	192	208	NA	115	115	NA	193	197	NA	359	365	NA	344	372	NA	346	360	NA	197	197	NA	173	173	NA	220	222	NA	156	156	NA
2023-PLATE-47_2022-2345_5-Pressure_0PSI_R1_005	0 PSI	267	275	NA	152	164	NA	343	343	NA	224	224	NA	206	242	NA	140	144	NA	200	208	NA	103	115	NA	187	193	NA	359	363	NA	336	372	NA	360	360	NA	191	197	NA	173	173	NA	220	222	NA	154	168	NA
2023-PLATE-47_2022-2345_50-Pressure_0PSI_R1_050	0 PSI	267	275	NA	124	164	NA	339	343	NA	224	244	NA	234	238	NA	140	144	NA	192	208	NA	115	115	NA	195	197	NA	359	365	NA	352	372	NA	346	346	NA	NA	NA	NA	173	175	NA	220	222	NA	156	156	NA
2023-PLATE-47_2022-2345_51-Pressure_0PSI_R1_051	0 PSI	275	283	NA	124	148	NA	343	343	NA	NA	NA	NA	234	238	NA	140	144	NA	188	196	NA	103	103	NA	187	187	NA	359	365	NA	336	372	NA	346	352	NA	191	201	NA	175	175	NA	220	222	NA	154	156	NA
2023-PLATE-47_2022-2345_52-Pressure_0PSI_R1_052	0 PSI	267	279	NA	124	164	NA	343	343	NA	224	249	NA	222	234	NA	140	140	NA	196	200	NA	103	115	NA	187	197	NA	359	363	NA	336	364	NA	346	360	NA	191	197	NA	173	173	NA	220	222	NA	156	168	NA
2023-PLATE-47_2022-2345_53-Pressure_0PSI_R1_053	0 PSI	267	279	NA	152	164	NA	NA	NA	NA	224	249	NA	222	242	NA	140	140	NA	200	208	NA	103	115	NA	187	197	NA	359	363	NA	336	364	NA	346	346	NA	191	197	NA	173	173	NA	222	226	NA	168	168	NA
2023-PLATE-47_2022-2345_54-Pressure_0PSI_R1_054	0 PSI	267	275	NA	148	152	NA	319	327	NA	224	224	NA	238	242	NA	140	144	NA	188	208	NA	115	115	NA	187	197	NA	365	365	NA	372	372	NA	346	360	NA	191	201	NA	173	173	NA	222	222	NA	154	156	NA
2023-PLATE-47_2022-2345_55-Pressure_0PSI_R1_055	0 PSI	267	275	NA	124	148	NA	343	343	NA	224	249	NA	222	234	NA	140	140	NA	196	200	NA	103	115	NA	187	195	NA	359	359	NA	336	372	NA	346	360	NA	197	201	NA	173	175	NA	220	222	NA	154	168	NA
2023-PLATE-47_2022-2345_56-Pressure_0PSI_R1_056	0 PSI	275	283	NA	124	148	NA	319	343	NA	224	244	NA	234	234	NA	140	140	NA	196	200	NA	115	115	NA	195	197	NA	359	365	NA	364	372	NA	346	360	NA	197	201	NA	173	173	NA	220	222	NA	154	156	NA
2023-PLATE-47_2022-2345_57-Pressure_0PSI_R1_057	0 PSI	267	275	NA	124	164	NA	319	343	NA	224	249	NA	234	234	NA	140	144	NA	200	208	NA	103	115	NA	197	197	NA	359	363	NA	364	372	NA	346	360	NA	191	201	NA	173	175	NA	222	226	NA	154	156	NA
2023-PLATE-47_2022-2345_58-Pressure_0PSI_R1_058	0 PSI	267	275	NA	148	152	NA	343	343	NA	224	249	NA	234	234	NA	140	140	NA	200	208	NA	115	115	NA	187	195	NA	359	359	NA	336	372	NA	346	346	NA	197	201	NA	173	173	NA	222	226	NA	156	168	NA
2023-PLATE-47_2022-2345_59-Pressure_0PSI_R1_059	0 PSI	267	275	NA	152	164	NA	319	339	NA	224	244	NA	238	242	NA	140	144	NA	192	208	NA	115	115	NA	193	197	NA	359	365	NA	344	372	NA	346	360	NA	191	197	NA	173	173	NA	220	222	NA	156	156	NA
2023-PLATE-47_2022-2345_6-Pressure_0PSI_R1_006	0 PSI	267	275	NA	124	148	NA	327	343	NA	224	224	NA	234	238	NA	140	144	NA	200	208	NA	103	115	NA	187	187	NA	359	365	NA	336	344	NA	360	360	NA	191	201	NA	173	173	NA	222	222	NA	154	168	NA
2023-PLATE-47_2022-2345_60-Pressure_0PSI_R1_060	0 PSI	275	283	NA	124	148	NA	319	343	NA	224	224	NA	234	238	NA	140	144	NA	200	208	NA	115	115	NA	187	187	NA	359	365	NA	336	372	NA	352	360	NA	191	197	NA	175	175	NA	222	222	NA	154	156	NA
2023-PLATE-47_2022-2345_61-Pressure_0PSI_R1_061	0 PSI	267	275	NA	124	148	NA	315	319	NA	224	244	NA	238	242	NA	140	140	NA	208	224	NA	115	115	NA	195	197	NA	359	359	NA	344	372	NA	352	360	NA	197	201	NA	173	175	NA	220	222	NA	156	156	NA
2023-PLATE-47_2022-2345_7-Pressure_0PSI_R1_007	0 PSI	275	283	NA	152	164	NA	327	343	NA	224	224	NA	234	238	NA	140	144	NA	188	208	NA	103	115	NA	187	197	NA	365	365	NA	344	372	NA	352	360	NA	191	201	NA	173	175	NA	222	222	NA	154	168	NA
2023-PLATE-47_2022-2345_8-Pressure_0PSI_R1_008	0 PSI	267	275	NA	124	148	NA	339	343	NA	224	244	NA	234	238	NA	140	144	NA	196	224	NA	103	115	NA	195	197	NA	359	365	NA	352	372	NA	346	360	NA	191	201	NA	173	175	NA	220	222	NA	156	156	NA
2023-PLATE-47_2022-2345_9-Pressure_0PSI_R1_009	0 PSI	267	275	NA	124	164	NA	327	343	NA	224	224	NA	206	242	NA	140	144	NA	188	196	NA	103	103	NA	187	187	NA	359	365	NA	336	372	NA	360	360	NA	191	201	NA	173	173	NA	222	222	NA	154	156	NA
2023-PLATE-48_2022-2345_100-Pressure_0PSI_R1_100	0 PSI	275	283	NA	124	148	NA	339	343	NA	224	244	NA	242	246	NA	140	140	NA	192	208	NA	103	115	NA	193	197	NA	359	365	NA	344	372	NA	346	360	NA	197	197	NA	173	173	NA	220	222	NA	156	168	NA
2023-PLATE-48_2022-2345_101-Pressure_0PSI_R1_101	0 PSI	267	275	NA	148	152	NA	343	343	NA	224	224	NA	238	242	NA	140	144	NA	188	196	NA	103	115	NA	187	187	NA	359	365	NA	336	372	NA	352	360	NA	191	197	NA	175	175	NA	220	222	NA	154	168	NA
2023-PLATE-48_2022-2345_102-Pressure_0PSI_R1_102	0 PSI	267	279	NA	148	152	NA	343	343	NA	224	244	NA	222	242	NA	140	144	NA	200	208	NA	103	115	NA	187	197	NA	359	359	NA	336	364	NA	346	360	NA	191	191	NA	173	175	NA	220	222	NA	168	168	NA
2023-PLATE-48_2022-2345_103-Pressure_0PSI_R1_103	0 PSI	275	283	NA	124	148	NA	319	343	NA	224	244	NA	222	234	NA	140	140	NA	196	200	NA	103	115	NA	187	197	NA	359	359	NA	336	364	NA	346	360	NA	191	197	NA	173	175	NA	220	222	NA	168	168	NA
2023-PLATE-48_2022-2345_104-Pressure_0PSI_R1_104	0 PSI	275	283	NA	148	152	NA	343	343	NA	NA	NA	NA	234	238	NA	140	144	NA	200	208	NA	115	115	NA	187	193	NA	359	363	NA	336	372	NA	346	352	NA	191	201	NA	173	175	NA	220	222	NA	154	168	NA
2023-PLATE-48_2022-2345_105-Pressure_0PSI_R1_105	0 PSI	279	283	NA	124	148	NA	319	343	NA	224	244	NA	234	242	NA	140	144	NA	196	200	NA	103	115	NA	187	197	NA	359	365	NA	336	364	NA	346	360	NA	191	191	NA	173	175	NA	222	226	NA	154	168	NA
2023-PLATE-48_2022-2345_106-Pressure_0PSI_R1_106	0 PSI	275	283	NA	152	164	NA	343	343	NA	224	249	NA	234	242	NA	140	140	NA	200	208	NA	103	115	NA	187	195	NA	359	359	NA	336	364	NA	346	360	NA	191	197	NA	173	175	NA	222	226	NA	154	168	NA
2023-PLATE-48_2022-2345_107-Pressure_0PSI_R1_107	0 PSI	275	283	NA	152	164	NA	315	343	NA	224	244	NA	242	246	NA	140	144	NA	196	224	NA	115	115	NA	187	195	NA	359	359	NA	336	352	NA	346	360	NA	191	201	NA	173	175	NA	220	222	NA	156	168	NA
2023-PLATE-48_2022-2345_108-Pressure_0PSI_R1_108	0 PSI	275	283	NA	124	148	NA	319	339	NA	224	244	NA	238	242	NA	140	144	NA	208	224	NA	103	115	NA	187	195	NA	359	359	NA	336	352	NA	346	352	NA	191	201	NA	173	175	NA	220	222	NA	156	168	NA
2023-PLATE-48_2022-2345_109-Pressure_0PSI_R1_109	0 PSI	267	275	NA	152	164	NA	319	343	NA	NA	NA	NA	206	242	NA	140	144	NA	196	200	NA	103	115	NA	187	193	NA	359	363	NA	336	372	NA	346	360	NA	191	201	NA	173	173	NA	222	222	NA	154	156	NA
2023-PLATE-48_2022-2345_110-Pressure_0PSI_R1_110	0 PSI	267	275	NA	152	164	NA	327	343	NA	NA	NA	NA	206	234	NA	140	144	NA	188	196	NA	NA	NA	NA	187	187	NA	365	365	NA	336	372	NA	346	360	NA	191	197	NA	173	173	NA	220	222	NA	154	168	NA
2023-PLATE-48_2022-2345_111-Pressure_0PSI_R1_111	0 PSI	275	283	NA	152	164	NA	319	339	NA	224	244	NA	238	242	NA	140	144	NA	192	196	NA	103	115	NA	193	197	NA	359	365	NA	344	372	NA	346	352	NA	191	197	NA	173	173	NA	220	222	NA	156	168	NA
2023-PLATE-48_2022-2345_112-Pressure_0PSI_R1_112	0 PSI	275	283	NA	124	148	NA	339	343	NA	224	244	NA	234	246	NA	140	140	NA	192	196	NA	103	115	NA	195	197	NA	359	365	NA	352	372	NA	352	360	NA	197	197	NA	173	173	NA	220	222	NA	156	156	NA
2023-PLATE-48_2022-2345_113-Pressure_0PSI_R1_113	0 PSI	267	275	NA	148	152	NA	327	343	NA	NA	NA	NA	206	242	NA	140	140	NA	188	196	NA	115	115	NA	187	193	NA	359	363	NA	336	344	NA	360	360	NA	197	201	NA	173	173	NA	220	222	NA	154	156	NA
2023-PLATE-48_2022-2345_114-Pressure_0PSI_R1_114	0 PSI	267	275	NA	124	164	NA	319	339	NA	224	244	NA	238	242	NA	140	144	NA	196	224	NA	103	115	NA	195	197	NA	359	365	NA	352	372	NA	346	360	NA	191	201	NA	173	173	NA	220	222	NA	156	168	NA
2023-PLATE-48_2022-2345_115-Pressure_0PSI_R1_115	0 PSI	275	283	NA	152	164	NA	343	343	NA	224	224	NA	206	234	NA	140	144	NA	196	200	NA	103	115	NA	187	197	NA	365	365	NA	372	372	NA	346	360	NA	191	197	NA	173	173	NA	222	222	NA	154	156	NA
2023-PLATE-48_2022-2345_116-Pressure_0PSI_R1_116	0 PSI	275	283	NA	124	164	NA	343	343	NA	224	224	NA	234	238	NA	140	144	NA	200	208	NA	103	103	NA	187	197	NA	359	363	NA	372	372	NA	346	352	NA	191	201	NA	173	175	NA	220	222	NA	154	168	NA
2023-PLATE-48_2022-2345_117-Pressure_0PSI_R1_117	0 PSI	NA	NA	NA	NA	NA	NA	NA	NA	NA	NA	NA	NA	NA	NA	NA	NA	NA	NA	NA	NA	NA	NA	NA	NA	NA	NA	NA	NA	NA	NA	NA	NA	NA	NA	NA	NA	NA	NA	NA	NA	NA	NA	NA	NA	NA	NA	NA	NA
2023-PLATE-48_2022-2345_118-Pressure_0PSI_R1_118	0 PSI	279	283	NA	124	148	NA	319	343	NA	224	244	NA	234	234	NA	140	140	NA	200	208	NA	115	115	NA	187	197	NA	363	365	NA	336	364	NA	346	360	NA	191	197	NA	173	175	NA	222	226	NA	154	156	NA
2023-PLATE-48_2022-2345_119-Pressure_0PSI_R1_119	0 PSI	267	275	NA	148	152	NA	319	339	NA	224	244	NA	234	246	NA	140	144	NA	192	196	NA	103	115	NA	187	193	NA	359	359	NA	336	352	NA	346	346	NA	191	201	NA	173	173	NA	220	222	NA	156	156	NA
2023-PLATE-48_2022-2345_120-Pressure_0PSI_R1_120	0 PSI	275	283	NA	148	152	NA	319	343	NA	NA	NA	NA	NA	NA	NA	NA	NA	NA	200	208	NA	103	115	NA	197	197	NA	363	365	NA	372	372	NA	346	346	NA	191	197	NA	173	173	NA	222	226	NA	154	168	NA
2023-PLATE-48_2022-2345_121-Pressure_0PSI_R1_121	0 PSI	279	283	NA	124	148	NA	319	343	NA	224	244	NA	234	234	NA	140	140	NA	196	200	NA	103	115	NA	187	195	NA	359	359	NA	336	364	NA	346	346	NA	191	197	NA	173	173	NA	220	222	NA	168	168	NA
2023-PLATE-48_2022-2345_122-Pressure_0PSI_R1_122	0 PSI	267	275	NA	124	148	NA	315	319	NA	224	244	NA	NA	NA	NA	140	144	NA	208	224	NA	115	115	NA	187	195	NA	359	365	NA	336	352	NA	346	346	NA	191	201	NA	173	173	NA	220	222	NA	156	168	NA
2023-PLATE-48_2022-2345_123-Pressure_0PSI_R1_123	0 PSI	267	275	NA	148	152	NA	327	343	NA	224	224	NA	234	238	NA	140	140	NA	188	196	NA	103	115	NA	187	187	NA	359	365	NA	336	344	NA	352	360	NA	197	197	NA	175	175	NA	222	222	NA	154	168	NA
2023-PLATE-48_2022-2345_124-Pressure_0PSI_R1_124	0 PSI	275	283	NA	148	152	NA	319	327	NA	224	224	NA	206	234	NA	140	144	NA	196	200	NA	103	115	NA	187	193	NA	359	363	NA	336	344	NA	352	360	NA	191	201	NA	173	173	NA	220	222	NA	154	156	NA
2023-PLATE-48_2022-2345_125-Pressure_0PSI_R1_125	0 PSI	267	275	NA	152	164	NA	339	343	NA	224	244	NA	238	242	NA	140	144	NA	208	224	NA	115	115	NA	187	193	NA	359	359	NA	336	344	NA	346	352	NA	191	201	NA	173	173	NA	220	222	NA	156	168	NA
2023-PLATE-48_2022-2345_126-Pressure_0PSI_R2_001	0 PSI	267	279	NA	124	164	NA	319	343	NA	224	249	NA	234	234	NA	140	144	NA	200	208	NA	115	115	NA	195	197	NA	359	363	NA	372	372	NA	346	360	NA	191	191	NA	173	173	NA	222	226	NA	156	168	NA
2023-PLATE-48_2022-2345_127-Pressure_0PSI_R2_002	0 PSI	275	283	NA	124	164	NA	343	343	NA	224	249	NA	234	234	NA	140	144	NA	200	208	NA	115	115	NA	197	197	NA	359	363	NA	364	372	NA	346	346	NA	191	191	NA	173	173	NA	220	222	NA	154	156	NA
2023-PLATE-48_2022-2345_128-Pressure_0PSI_R2_003	0 PSI	267	275	NA	148	152	NA	319	343	NA	224	224	NA	206	234	NA	140	144	NA	188	196	NA	103	103	NA	187	193	NA	359	363	NA	336	372	NA	360	360	NA	191	201	NA	173	175	NA	222	222	NA	154	168	NA
2023-PLATE-48_2022-2345_129-Pressure_0PSI_R2_004	0 PSI	267	275	NA	124	148	NA	343	343	NA	224	244	NA	234	234	NA	140	144	NA	200	208	NA	115	115	NA	187	197	NA	359	359	NA	336	364	NA	346	346	NA	191	201	NA	173	173	NA	222	226	NA	154	168	NA
2023-PLATE-48_2022-2345_130-Pressure_0PSI_R2_005	0 PSI	267	279	NA	148	152	NA	343	343	NA	224	249	NA	234	242	NA	140	144	NA	200	208	NA	115	115	NA	187	197	NA	359	363	NA	336	364	NA	346	360	NA	191	191	NA	173	173	NA	222	226	NA	154	168	NA
2023-PLATE-48_2022-2345_131-Pressure_0PSI_R2_006	0 PSI	279	283	NA	152	164	NA	343	343	NA	224	249	NA	222	242	NA	140	144	NA	200	208	NA	103	115	NA	197	197	NA	363	365	NA	364	372	NA	346	360	NA	191	201	NA	173	173	NA	220	222	NA	154	168	NA
2023-PLATE-48_2022-2345_132-Pressure_0PSI_R2_007	0 PSI	275	283	NA	124	148	NA	319	339	NA	224	244	NA	234	238	NA	140	144	NA	192	208	NA	103	115	NA	187	193	NA	359	359	NA	336	344	NA	346	346	NA	191	201	NA	173	175	NA	220	222	NA	156	156	NA
2023-PLATE-48_2022-2345_133-Pressure_0PSI_R2_008	0 PSI	275	283	NA	148	152	NA	339	343	NA	224	244	NA	242	246	NA	140	140	NA	196	224	NA	115	115	NA	187	193	NA	359	365	NA	336	352	NA	346	352	NA	197	197	NA	173	175	NA	220	222	NA	156	168	NA
2023-PLATE-48_2022-2345_134-Pressure_0PSI_R2_009	0 PSI	275	283	NA	152	164	NA	319	343	NA	224	244	NA	222	234	NA	140	144	NA	196	200	NA	103	115	NA	187	197	NA	359	363	NA	336	364	NA	346	360	NA	191	191	NA	173	175	NA	220	222	NA	154	156	NA
2023-PLATE-48_2022-2345_135-Pressure_0PSI_R2_010	0 PSI	275	283	NA	148	152	NA	327	343	NA	NA	NA	NA	206	234	NA	140	140	NA	200	208	NA	103	115	NA	187	187	NA	359	365	NA	336	372	NA	346	360	NA	197	201	NA	173	175	NA	222	222	NA	154	156	NA
2023-PLATE-48_2022-2345_136-Pressure_0PSI_R2_011	0 PSI	267	275	NA	124	164	NA	339	343	NA	224	244	NA	234	238	NA	140	140	NA	196	224	NA	103	115	NA	187	195	NA	359	359	NA	336	352	NA	352	360	NA	197	201	NA	173	175	NA	220	222	NA	156	168	NA
2023-PLATE-48_2022-2345_137-Pressure_0PSI_R2_012	0 PSI	279	283	NA	148	152	NA	343	343	NA	224	244	NA	234	242	NA	140	140	NA	196	200	NA	115	115	NA	195	197	NA	359	365	NA	372	372	NA	346	346	NA	197	201	NA	173	175	NA	220	222	NA	154	168	NA
2023-PLATE-48_2022-2345_138-Pressure_0PSI_R2_013	0 PSI	275	283	NA	148	152	NA	339	343	NA	224	244	NA	242	246	NA	140	140	NA	208	224	NA	103	115	NA	187	195	NA	359	359	NA	336	344	NA	346	352	NA	197	201	NA	173	175	NA	220	222	NA	156	156	NA
2023-PLATE-48_2022-2345_139-Pressure_0PSI_R2_014	0 PSI	275	283	NA	152	164	NA	319	343	NA	224	224	NA	206	242	NA	140	144	NA	196	200	NA	115	115	NA	187	193	NA	363	365	NA	336	344	NA	346	360	NA	191	197	NA	173	175	NA	222	222	NA	154	156	NA
2023-PLATE-48_2022-2345_140-Pressure_0PSI_R2_015	0 PSI	275	283	NA	148	152	NA	315	343	NA	224	244	NA	234	238	NA	140	140	NA	192	208	NA	115	115	NA	187	195	NA	359	359	NA	336	344	NA	346	360	NA	197	197	NA	173	173	NA	220	222	NA	156	156	NA
2023-PLATE-48_2022-2345_141-Pressure_0PSI_R2_016	0 PSI	275	283	NA	152	164	NA	319	343	NA	224	224	NA	234	238	NA	140	144	NA	188	208	NA	NA	NA	NA	187	193	NA	359	363	NA	336	344	NA	352	360	NA	191	201	NA	173	175	NA	220	222	NA	154	168	NA
2023-PLATE-48_2022-2345_142-Pressure_0PSI_R2_017	0 PSI	275	283	NA	124	164	NA	319	343	NA	NA	NA	NA	234	238	NA	140	140	NA	200	208	NA	NA	NA	NA	187	193	NA	359	363	NA	336	372	NA	352	360	NA	197	197	NA	173	175	NA	220	222	NA	154	168	NA
2023-PLATE-48_2022-2345_143-Pressure_0PSI_R2_018	0 PSI	267	275	NA	124	148	NA	319	343	NA	NA	NA	NA	238	242	NA	140	140	NA	196	200	NA	103	103	NA	187	187	NA	359	363	NA	336	372	NA	360	360	NA	197	197	NA	173	175	NA	222	222	NA	154	156	NA
2023-PLATE-48_2022-2345_144-Pressure_0PSI_R2_019	0 PSI	275	283	NA	152	164	NA	327	343	NA	NA	NA	NA	206	242	NA	140	140	NA	188	196	NA	NA	NA	NA	193	197	NA	359	363	NA	344	372	NA	346	352	NA	197	201	NA	175	175	NA	222	222	NA	154	168	NA
2023-PLATE-48_2022-2345_145-Pressure_0PSI_R2_020	0 PSI	267	275	NA	124	148	NA	339	343	NA	224	244	NA	234	238	NA	140	140	NA	192	196	NA	115	115	NA	193	197	NA	359	359	NA	344	372	NA	346	352	NA	197	201	NA	173	173	NA	220	222	NA	156	156	NA
2023-PLATE-48_2022-2345_146-Pressure_0PSI_R2_021	0 PSI	275	283	NA	124	164	NA	327	343	NA	NA	NA	NA	206	234	NA	140	144	NA	188	208	NA	103	115	NA	193	197	NA	359	363	NA	344	372	NA	352	360	NA	191	201	NA	173	173	NA	220	222	NA	154	156	NA
2023-PLATE-48_2022-2345_147-Pressure_0PSI_R2_022	0 PSI	267	275	NA	124	148	NA	319	343	NA	224	244	NA	222	242	NA	140	144	NA	200	208	NA	115	115	NA	187	195	NA	359	365	NA	336	372	NA	346	346	NA	191	201	NA	173	173	NA	220	222	NA	154	168	NA
2023-PLATE-48_2022-2345_148-Pressure_0PSI_R2_023	0 PSI	267	275	NA	152	164	NA	327	343	NA	224	224	NA	238	242	NA	140	144	NA	196	200	NA	103	115	NA	193	197	NA	363	365	NA	372	372	NA	360	360	NA	191	201	NA	173	175	NA	222	222	NA	154	168	NA
2023-PLATE-48_2022-2345_149-Pressure_0PSI_R2_024	0 PSI	267	275	NA	152	164	NA	343	343	NA	NA	NA	NA	206	234	NA	140	144	NA	188	208	NA	115	115	NA	187	193	NA	359	363	NA	336	344	NA	352	360	NA	191	201	NA	175	175	NA	222	222	NA	154	156	NA
2023-PLATE-48_2022-2345_150-Pressure_0PSI_R2_025	0 PSI	275	283	NA	152	164	NA	323	339	NA	224	244	NA	242	246	NA	140	140	NA	196	224	NA	103	115	NA	187	193	NA	359	359	NA	336	352	NA	346	346	NA	197	197	NA	173	175	NA	220	222	NA	156	156	NA
2023-PLATE-48_2022-2345_151-Pressure_0PSI_R2_026	0 PSI	275	283	NA	124	148	NA	343	343	NA	224	249	NA	222	234	NA	140	144	NA	200	208	NA	103	115	NA	197	197	NA	363	365	NA	372	372	NA	346	360	NA	191	201	NA	173	175	NA	222	226	NA	168	168	NA
2023-PLATE-48_2022-2345_152-Pressure_0PSI_R2_027	0 PSI	267	275	NA	152	164	NA	327	343	NA	224	224	NA	206	234	NA	140	144	NA	200	208	NA	103	103	NA	193	197	NA	363	365	NA	344	372	NA	346	352	NA	191	201	NA	173	173	NA	222	222	NA	154	156	NA
2023-PLATE-48_2022-2345_153-Pressure_0PSI_R2_028	0 PSI	267	279	NA	124	148	NA	343	343	NA	224	249	NA	234	234	NA	NA	NA	NA	200	208	NA	NA	NA	NA	NA	NA	NA	359	359	NA	336	372	NA	346	360	NA	191	201	NA	173	175	NA	220	222	NA	168	168	NA
2023-PLATE-48_2022-2345_154-Pressure_0PSI_R2_029	0 PSI	267	275	NA	124	164	NA	315	343	NA	224	244	NA	242	246	NA	140	144	NA	196	224	NA	115	115	NA	195	197	NA	359	365	NA	352	372	NA	346	346	NA	191	197	NA	173	173	NA	220	222	NA	156	168	NA
2023-PLATE-48_2022-2345_155-Pressure_0PSI_R2_030	0 PSI	279	283	NA	148	152	NA	319	343	NA	224	244	NA	234	234	NA	140	144	NA	200	208	NA	115	115	NA	197	197	NA	363	365	NA	364	372	NA	346	360	NA	191	191	NA	173	173	NA	222	226	NA	156	168	NA
2023-PLATE-48_2022-2345_62-Pressure_0PSI_R1_062	0 PSI	267	275	NA	124	164	NA	319	339	NA	224	244	NA	238	242	NA	140	140	NA	208	224	NA	103	115	NA	187	193	NA	359	359	NA	336	344	NA	346	360	NA	197	201	NA	173	173	NA	220	222	NA	156	168	NA
2023-PLATE-48_2022-2345_63-Pressure_0PSI_R1_063	0 PSI	267	275	NA	148	152	NA	319	343	NA	NA	NA	NA	234	238	NA	140	140	NA	200	208	NA	NA	NA	NA	187	193	NA	359	363	NA	336	344	NA	352	360	NA	197	201	NA	173	173	NA	220	222	NA	154	168	NA
2023-PLATE-48_2022-2345_64-Pressure_0PSI_R1_064	0 PSI	267	279	NA	148	152	NA	343	343	NA	224	249	NA	222	242	NA	140	144	NA	200	208	NA	115	115	NA	195	197	NA	359	365	NA	372	372	NA	346	360	NA	191	201	NA	173	173	NA	222	226	NA	154	156	NA
2023-PLATE-48_2022-2345_65-Pressure_0PSI_R1_065	0 PSI	275	283	NA	124	148	NA	315	343	NA	224	244	NA	234	246	NA	140	140	NA	192	196	NA	103	115	NA	187	193	NA	359	359	NA	336	344	NA	346	346	NA	197	201	NA	173	173	NA	220	222	NA	156	156	NA
2023-PLATE-48_2022-2345_66-Pressure_0PSI_R1_066	0 PSI	267	275	NA	124	164	NA	343	343	NA	224	249	NA	234	234	NA	140	144	NA	200	208	NA	115	115	NA	187	197	NA	359	363	NA	336	364	NA	346	346	NA	191	191	NA	173	175	NA	222	226	NA	154	156	NA
2023-PLATE-48_2022-2345_67-Pressure_0PSI_R1_067	0 PSI	275	283	NA	124	164	NA	327	343	NA	224	224	NA	238	242	NA	140	144	NA	188	196	NA	NA	NA	NA	193	197	NA	363	365	NA	344	372	NA	352	360	NA	191	197	NA	173	175	NA	222	222	NA	154	156	NA
2023-PLATE-48_2022-2345_68-Pressure_0PSI_R1_068	0 PSI	267	275	NA	124	148	NA	319	339	NA	224	244	NA	234	246	NA	140	144	NA	192	196	NA	115	115	NA	195	197	NA	359	365	NA	352	372	NA	352	360	NA	191	197	NA	173	173	NA	220	222	NA	156	156	NA
2023-PLATE-48_2022-2345_69-Pressure_0PSI_R1_069	0 PSI	275	283	NA	148	152	NA	319	327	NA	NA	NA	NA	238	242	NA	140	144	NA	200	208	NA	103	115	NA	187	187	NA	359	363	NA	336	372	NA	346	352	NA	191	197	NA	173	175	NA	220	222	NA	154	156	NA
2023-PLATE-48_2022-2345_70-Pressure_0PSI_R1_070	0 PSI	267	275	NA	124	164	NA	319	339	NA	224	244	NA	238	242	NA	140	140	NA	192	208	NA	115	115	NA	195	197	NA	359	365	NA	352	372	NA	346	352	NA	197	201	NA	173	175	NA	220	222	NA	156	156	NA
2023-PLATE-48_2022-2345_71-Pressure_0PSI_R1_071	0 PSI	275	283	NA	124	164	NA	315	343	NA	224	244	NA	234	238	NA	140	140	NA	192	208	NA	103	115	NA	193	197	NA	359	365	NA	352	372	NA	346	352	NA	197	201	NA	173	175	NA	220	222	NA	156	156	NA
2023-PLATE-48_2022-2345_72-Pressure_0PSI_R1_072	0 PSI	275	283	NA	124	164	NA	319	327	NA	NA	NA	NA	206	242	NA	140	140	NA	188	196	NA	103	115	NA	187	187	NA	359	365	NA	336	372	NA	352	360	NA	197	197	NA	173	173	NA	220	222	NA	154	156	NA
2023-PLATE-48_2022-2345_73-Pressure_0PSI_R1_073	0 PSI	275	283	NA	124	164	NA	319	327	NA	224	224	NA	206	242	NA	140	140	NA	188	196	NA	115	115	NA	187	197	NA	359	365	NA	344	372	NA	346	360	NA	197	201	NA	173	175	NA	222	222	NA	154	168	NA
2023-PLATE-48_2022-2345_74-Pressure_0PSI_R1_074	0 PSI	267	275	NA	124	164	NA	315	319	NA	224	244	NA	234	238	NA	140	144	NA	192	196	NA	115	115	NA	187	195	NA	359	365	NA	336	352	NA	346	352	NA	191	197	NA	173	173	NA	220	222	NA	156	156	NA
2023-PLATE-48_2022-2345_75-Pressure_0PSI_R1_075	0 PSI	275	283	NA	152	164	NA	315	343	NA	224	244	NA	234	246	NA	140	140	NA	192	208	NA	103	115	NA	187	193	NA	359	359	NA	336	344	NA	346	352	NA	197	201	NA	173	175	NA	220	222	NA	156	168	NA
2023-PLATE-48_2022-2345_76-Pressure_0PSI_R1_076	0 PSI	267	279	NA	148	152	NA	343	343	NA	224	244	NA	234	242	NA	140	144	NA	196	200	NA	103	115	NA	187	197	NA	359	363	NA	336	372	NA	346	360	NA	191	201	NA	173	173	NA	222	226	NA	156	168	NA
2023-PLATE-48_2022-2345_77-Pressure_0PSI_R1_077	0 PSI	267	275	NA	148	152	NA	343	343	NA	224	224	NA	206	234	NA	140	144	NA	200	208	NA	103	115	NA	187	187	NA	363	365	NA	336	372	NA	352	360	NA	191	197	NA	173	175	NA	220	222	NA	154	168	NA
2023-PLATE-48_2022-2345_78-Pressure_0PSI_R1_078	0 PSI	267	275	NA	124	164	NA	343	343	NA	224	249	NA	234	242	NA	140	140	NA	200	208	NA	115	115	NA	187	197	NA	363	365	NA	336	368	NA	346	360	NA	191	197	NA	173	175	NA	222	226	NA	156	168	NA
2023-PLATE-48_2022-2345_79-Pressure_0PSI_R1_079	0 PSI	267	275	NA	148	152	NA	319	343	NA	224	244	NA	234	242	NA	140	144	NA	196	200	NA	103	115	NA	197	197	NA	363	365	NA	364	372	NA	346	346	NA	191	191	NA	173	173	NA	222	226	NA	156	168	NA
2023-PLATE-48_2022-2345_80-Pressure_0PSI_R1_080	0 PSI	275	283	NA	152	164	NA	319	339	NA	224	244	NA	234	246	NA	140	140	NA	192	208	NA	115	115	NA	195	197	NA	359	359	NA	352	372	NA	346	352	NA	197	201	NA	173	173	NA	220	222	NA	156	156	NA
2023-PLATE-48_2022-2345_81-Pressure_0PSI_R1_081	0 PSI	267	275	NA	124	148	NA	343	343	NA	NA	NA	NA	234	238	NA	140	144	NA	188	196	NA	103	115	NA	187	197	NA	359	365	NA	372	372	NA	360	360	NA	191	197	NA	175	175	NA	220	222	NA	154	156	NA
2023-PLATE-48_2022-2345_82-Pressure_0PSI_R1_082	0 PSI	267	279	NA	148	152	NA	343	343	NA	224	249	NA	234	234	NA	140	144	NA	200	208	NA	103	115	NA	187	195	NA	359	359	NA	336	372	NA	346	360	NA	191	201	NA	173	173	NA	222	226	NA	168	168	NA
2023-PLATE-48_2022-2345_83-Pressure_0PSI_R1_083	0 PSI	275	283	NA	124	148	NA	343	343	NA	224	224	NA	206	234	NA	140	144	NA	196	200	NA	115	115	NA	187	193	NA	359	363	NA	336	372	NA	360	360	NA	191	197	NA	173	173	NA	220	222	NA	154	168	NA
2023-PLATE-48_2022-2345_84-Pressure_0PSI_R1_084	0 PSI	267	275	NA	124	148	NA	319	339	NA	224	244	NA	238	242	NA	140	140	NA	192	208	NA	103	115	NA	193	197	NA	359	359	NA	344	372	NA	346	352	NA	197	197	NA	173	175	NA	220	222	NA	156	168	NA
2023-PLATE-48_2022-2345_85-Pressure_0PSI_R1_085	0 PSI	267	275	NA	124	164	NA	339	343	NA	224	244	NA	234	246	NA	140	144	NA	192	196	NA	115	115	NA	187	195	NA	359	365	NA	336	352	NA	352	360	NA	191	201	NA	173	173	NA	220	222	NA	156	168	NA
2023-PLATE-48_2022-2345_86-Pressure_0PSI_R1_086	0 PSI	275	283	NA	148	152	NA	327	343	NA	NA	NA	NA	238	242	NA	140	144	NA	200	208	NA	103	115	NA	193	197	NA	363	365	NA	344	372	NA	346	360	NA	191	197	NA	173	175	NA	222	222	NA	154	168	NA
2023-PLATE-48_2022-2345_87-Pressure_0PSI_R1_087	0 PSI	267	275	NA	148	152	NA	319	343	NA	NA	NA	NA	234	238	NA	140	140	NA	196	200	NA	103	103	NA	187	187	NA	365	365	NA	336	372	NA	346	352	NA	197	201	NA	175	175	NA	220	222	NA	154	168	NA
2023-PLATE-48_2022-2345_88-Pressure_0PSI_R1_088	0 PSI	275	283	NA	148	152	NA	343	343	NA	NA	NA	NA	234	238	NA	140	144	NA	188	196	NA	NA	NA	NA	187	187	NA	359	365	NA	336	372	NA	360	360	NA	191	197	NA	173	175	NA	222	222	NA	154	168	NA
2023-PLATE-48_2022-2345_89-Pressure_0PSI_R1_089	0 PSI	267	279	NA	124	164	NA	343	343	NA	224	249	NA	234	234	NA	140	144	NA	196	200	NA	115	115	NA	187	195	NA	359	359	NA	336	372	NA	346	346	NA	191	191	NA	173	173	NA	220	222	NA	154	168	NA
2023-PLATE-48_2022-2345_90-Pressure_0PSI_R1_090	0 PSI	275	283	NA	152	164	NA	339	343	NA	224	244	NA	234	238	NA	140	140	NA	208	228	NA	103	115	NA	195	197	NA	359	365	NA	352	372	NA	352	360	NA	197	197	NA	173	175	NA	220	222	NA	156	156	NA
2023-PLATE-48_2022-2345_91-Pressure_0PSI_R1_091	0 PSI	267	275	NA	124	148	NA	319	327	NA	NA	NA	NA	238	242	NA	140	140	NA	188	208	NA	115	115	NA	187	187	NA	359	365	NA	336	344	NA	360	360	NA	197	197	NA	173	175	NA	222	222	NA	154	168	NA
2023-PLATE-48_2022-2345_92-Pressure_0PSI_R1_092	0 PSI	267	275	NA	152	164	NA	327	343	NA	NA	NA	NA	234	238	NA	140	140	NA	188	208	NA	115	115	NA	187	187	NA	359	365	NA	336	372	NA	360	360	NA	197	201	NA	173	173	NA	220	222	NA	154	168	NA
2023-PLATE-48_2022-2345_93-Pressure_0PSI_R1_093	0 PSI	267	275	NA	148	152	NA	339	343	NA	224	244	NA	242	246	NA	140	144	NA	208	224	NA	115	115	NA	195	197	NA	359	365	NA	344	372	NA	346	346	NA	191	197	NA	173	175	NA	220	222	NA	156	156	NA
2023-PLATE-48_2022-2345_94-Pressure_0PSI_R1_094	0 PSI	267	279	NA	148	152	NA	319	343	NA	224	244	NA	234	234	NA	140	140	NA	196	200	NA	103	115	NA	187	197	NA	363	365	NA	336	364	NA	346	346	NA	191	197	NA	173	173	NA	220	222	NA	154	168	NA
2023-PLATE-48_2022-2345_95-Pressure_0PSI_R1_095	0 PSI	279	283	NA	152	164	NA	343	343	NA	224	244	NA	222	234	NA	140	144	NA	200	208	NA	103	115	NA	187	197	NA	359	363	NA	336	364	NA	346	346	NA	191	201	NA	173	175	NA	222	226	NA	168	168	NA
2023-PLATE-48_2022-2345_96-Pressure_0PSI_R1_096	0 PSI	267	275	NA	124	164	NA	315	319	NA	224	244	NA	242	246	NA	140	140	NA	208	224	NA	115	115	NA	193	197	NA	359	365	NA	352	372	NA	346	352	NA	197	197	NA	173	173	NA	220	222	NA	156	168	NA
2023-PLATE-48_2022-2345_97-Pressure_0PSI_R1_097	0 PSI	275	283	NA	152	164	NA	319	327	NA	224	224	NA	238	242	NA	140	144	NA	196	200	NA	115	115	NA	187	187	NA	359	365	NA	336	372	NA	352	360	NA	191	197	NA	173	175	NA	220	222	NA	154	168	NA
2023-PLATE-48_2022-2345_98-Pressure_0PSI_R1_098	0 PSI	275	283	NA	152	164	NA	343	343	NA	224	224	NA	206	234	NA	140	144	NA	196	200	NA	103	103	NA	187	197	NA	365	365	NA	344	372	NA	360	360	NA	191	197	NA	173	175	NA	222	222	NA	154	156	NA
2023-PLATE-48_2022-2345_99-Pressure_0PSI_R1_099	0 PSI	267	275	NA	124	164	NA	319	343	NA	224	224	NA	206	234	NA	140	144	NA	200	208	NA	103	115	NA	193	197	NA	363	365	NA	344	372	NA	346	352	NA	191	197	NA	173	175	NA	222	222	NA	154	156	NA
2023-PLATE-49_2022-2345_156-Pressure_0PSI_R2_031	0 PSI	275	283	NA	148	152	NA	319	327	NA	224	224	NA	206	234	NA	140	140	NA	NA	NA	NA	115	115	NA	187	197	NA	359	365	NA	372	372	NA	346	352	NA	197	197	NA	173	175	NA	222	222	NA	154	168	NA
2023-PLATE-49_2022-2345_157-Pressure_0PSI_R2_032	0 PSI	275	283	NA	152	164	NA	339	343	NA	224	244	NA	234	238	NA	140	144	NA	196	224	NA	103	115	NA	187	195	NA	359	359	NA	336	344	NA	352	360	NA	NA	NA	NA	173	175	NA	220	222	NA	156	156	NA
2023-PLATE-49_2022-2345_158-Pressure_0PSI_R2_033	0 PSI	275	283	NA	148	152	NA	319	339	NA	224	244	NA	234	246	NA	140	144	NA	196	224	NA	115	115	NA	195	197	NA	359	365	NA	352	372	NA	346	346	NA	191	201	NA	173	173	NA	220	222	NA	156	168	NA
2023-PLATE-49_2022-2345_159-Pressure_0PSI_R2_034	0 PSI	267	275	NA	124	164	NA	339	343	NA	224	244	NA	238	242	NA	140	140	NA	192	196	NA	115	115	NA	187	193	NA	359	359	NA	336	344	NA	346	360	NA	197	201	NA	173	173	NA	220	222	NA	156	156	NA
2023-PLATE-49_2022-2345_160-Pressure_0PSI_R2_035	0 PSI	279	283	NA	148	152	NA	319	343	NA	224	249	NA	222	242	NA	140	140	NA	196	200	NA	103	115	NA	197	197	NA	359	363	NA	364	372	NA	346	346	NA	191	197	NA	173	173	NA	220	222	NA	156	168	NA
2023-PLATE-49_2022-2345_161-Pressure_0PSI_R2_036	0 PSI	275	283	NA	148	152	NA	343	343	NA	NA	NA	NA	238	242	NA	140	140	NA	196	200	NA	115	115	NA	187	193	NA	359	363	NA	336	344	NA	360	360	NA	197	201	NA	173	175	NA	220	222	NA	154	168	NA
2023-PLATE-49_2022-2345_162-Pressure_0PSI_R2_037	0 PSI	275	283	NA	124	164	NA	319	339	NA	224	244	NA	242	246	NA	140	144	NA	192	208	NA	103	115	NA	187	193	NA	359	359	NA	336	344	NA	346	360	NA	191	197	NA	173	173	NA	220	222	NA	156	156	NA
2023-PLATE-49_2022-2345_163-Pressure_0PSI_R2_038	0 PSI	267	275	NA	124	164	NA	343	343	NA	224	249	NA	234	234	NA	140	144	NA	200	208	NA	103	115	NA	187	195	NA	359	359	NA	336	364	NA	346	360	NA	191	191	NA	173	175	NA	222	226	NA	154	156	NA
2023-PLATE-49_2022-2345_164-Pressure_0PSI_R2_039	0 PSI	275	283	NA	152	164	NA	315	319	NA	224	244	NA	238	242	NA	140	144	NA	196	224	NA	103	115	NA	187	193	NA	359	359	NA	336	344	NA	346	360	NA	191	197	NA	173	173	NA	220	222	NA	156	168	NA
2023-PLATE-49_2022-2345_165-Pressure_0PSI_R2_040	0 PSI	267	275	NA	124	164	NA	339	343	NA	224	244	NA	238	242	NA	140	144	NA	208	224	NA	103	115	NA	193	197	NA	359	365	NA	344	372	NA	346	352	NA	191	201	NA	173	173	NA	220	222	NA	156	168	NA
2023-PLATE-49_2022-2345_166-Pressure_0PSI_R2_041	0 PSI	275	283	NA	NA	NA	NA	319	327	NA	224	224	NA	238	242	NA	140	140	NA	200	208	NA	103	103	NA	187	193	NA	363	365	NA	336	344	NA	360	360	NA	197	201	NA	173	173	NA	220	222	NA	154	156	NA
2023-PLATE-49_2022-2345_167-Pressure_0PSI_R2_042	0 PSI	275	283	NA	124	148	NA	319	339	NA	224	244	NA	234	246	NA	140	140	NA	208	224	NA	115	115	NA	187	195	NA	359	365	NA	336	344	NA	346	346	NA	197	197	NA	173	175	NA	220	222	NA	156	156	NA
2023-PLATE-49_2022-2345_168-Pressure_0PSI_R2_043	0 PSI	267	275	NA	148	152	NA	319	343	NA	224	249	NA	222	234	NA	140	144	NA	200	208	NA	103	115	NA	195	197	NA	359	365	NA	364	372	NA	346	360	NA	191	201	NA	173	175	NA	222	226	NA	154	156	NA
2023-PLATE-49_2022-2345_169-Pressure_0PSI_R2_044	0 PSI	275	283	NA	152	164	NA	319	343	NA	NA	NA	NA	238	242	NA	140	144	NA	196	200	NA	103	103	NA	187	187	NA	359	363	NA	336	372	NA	346	360	NA	191	197	NA	175	175	NA	222	222	NA	154	168	NA
2023-PLATE-49_2022-2345_170-Pressure_0PSI_R2_045	0 PSI	275	283	NA	152	164	NA	315	343	NA	224	244	NA	242	246	NA	140	140	NA	208	224	NA	103	115	NA	195	197	NA	359	365	NA	352	372	NA	352	360	NA	197	201	NA	173	175	NA	220	222	NA	156	156	NA
2023-PLATE-49_2022-2345_171-Pressure_0PSI_R2_046	0 PSI	275	283	NA	148	152	NA	327	343	NA	NA	NA	NA	206	242	NA	140	140	NA	196	200	NA	103	115	NA	193	197	NA	363	365	NA	344	372	NA	346	360	NA	197	201	NA	175	175	NA	222	222	NA	154	156	NA
2023-PLATE-49_2022-2345_172-Pressure_0PSI_R2_047	0 PSI	267	275	NA	148	152	NA	319	327	NA	224	224	NA	234	238	NA	140	144	NA	200	208	NA	115	115	NA	187	197	NA	365	365	NA	372	372	NA	346	360	NA	191	197	NA	173	175	NA	222	222	NA	154	168	NA
2023-PLATE-49_2022-2345_173-Pressure_0PSI_R2_048	0 PSI	275	283	NA	152	164	NA	339	343	NA	224	244	NA	234	238	NA	140	140	NA	192	208	NA	115	115	NA	195	197	NA	359	365	NA	352	372	NA	346	346	NA	197	197	NA	173	175	NA	220	222	NA	156	156	NA
2023-PLATE-49_2022-2345_174-Pressure_0PSI_R2_049	0 PSI	275	283	NA	152	164	NA	319	327	NA	224	224	NA	234	238	NA	140	140	NA	188	208	NA	115	115	NA	187	193	NA	359	363	NA	336	372	NA	346	352	NA	197	197	NA	173	175	NA	222	222	NA	154	168	NA
2023-PLATE-49_2022-2345_175-Pressure_0PSI_R2_050	0 PSI	275	283	NA	124	164	NA	315	343	NA	224	244	NA	234	238	NA	140	144	NA	196	224	NA	115	115	NA	193	197	NA	359	365	NA	344	372	NA	346	352	NA	191	197	NA	173	175	NA	220	222	NA	156	156	NA
2023-PLATE-49_2022-2345_176-Pressure_0PSI_R2_051	0 PSI	275	283	NA	152	164	NA	319	343	NA	224	249	NA	222	234	NA	140	140	NA	200	208	NA	103	115	NA	195	197	NA	359	359	NA	364	372	NA	346	360	NA	197	201	NA	173	175	NA	220	222	NA	154	168	NA
2023-PLATE-49_2022-2345_177-Pressure_0PSI_R2_052	0 PSI	267	275	NA	124	148	NA	343	343	NA	224	249	NA	234	234	NA	140	144	NA	200	208	NA	115	115	NA	195	197	NA	359	365	NA	372	372	NA	346	360	NA	191	191	NA	173	175	NA	220	222	NA	154	156	NA
2023-PLATE-49_2022-2345_178-Pressure_0PSI_R2_053	0 PSI	275	283	NA	124	164	NA	319	343	NA	224	249	NA	234	242	NA	140	144	NA	200	208	NA	103	115	NA	197	197	NA	363	365	NA	364	372	NA	346	360	NA	191	201	NA	173	173	NA	222	226	NA	154	156	NA
2023-PLATE-49_2022-2345_179-Pressure_0PSI_R2_054	0 PSI	267	275	NA	124	148	NA	319	339	NA	224	244	NA	234	246	NA	140	144	NA	192	196	NA	103	115	NA	187	193	NA	359	359	NA	336	344	NA	346	352	NA	191	201	NA	173	175	NA	220	222	NA	156	156	NA
2023-PLATE-49_2022-2345_180-Pressure_0PSI_R2_055	0 PSI	275	283	NA	152	164	NA	323	327	NA	NA	NA	NA	206	242	NA	140	140	NA	200	208	NA	103	115	NA	187	193	NA	365	365	NA	336	344	NA	346	360	NA	197	201	NA	173	173	NA	220	222	NA	154	156	NA
2023-PLATE-49_2022-2345_181-Pressure_0PSI_R2_056	0 PSI	267	275	NA	124	148	NA	339	343	NA	224	244	NA	234	238	NA	140	144	NA	192	196	NA	103	115	NA	187	195	NA	359	359	NA	336	344	NA	346	346	NA	191	201	NA	173	173	NA	220	222	NA	156	156	NA
2023-PLATE-49_2022-2345_182-Pressure_0PSI_R2_057	0 PSI	275	283	NA	148	152	NA	319	327	NA	224	224	NA	206	234	NA	140	144	NA	188	196	NA	115	115	NA	193	197	NA	363	365	NA	344	372	NA	346	352	NA	191	201	NA	173	173	NA	222	222	NA	154	168	NA
2023-PLATE-49_2022-2345_183-Pressure_0PSI_R2_058	0 PSI	275	283	NA	152	164	NA	319	343	NA	224	244	NA	222	234	NA	140	144	NA	200	208	NA	115	115	NA	187	195	NA	359	359	NA	336	364	NA	346	346	NA	191	191	NA	173	175	NA	220	222	NA	156	168	NA
2023-PLATE-49_2022-2345_184-Pressure_0PSI_R2_059	0 PSI	267	275	NA	124	148	NA	339	343	NA	224	244	NA	242	246	NA	140	144	NA	192	208	NA	103	115	NA	193	197	NA	359	365	NA	344	372	NA	346	360	NA	191	201	NA	173	173	NA	220	222	NA	156	156	NA
2023-PLATE-49_2022-2345_185-Pressure_0PSI_R2_060	0 PSI	267	275	NA	124	148	NA	339	343	NA	224	244	NA	238	242	NA	140	144	NA	196	224	NA	103	115	NA	195	197	NA	359	365	NA	352	372	NA	346	346	NA	191	201	NA	173	175	NA	220	222	NA	156	168	NA
2023-PLATE-49_2022-2345_186-Pressure_0PSI_R2_061	0 PSI	279	283	NA	148	152	NA	343	343	NA	224	249	NA	234	234	NA	140	144	NA	196	200	NA	103	115	NA	187	197	NA	359	363	NA	336	364	NA	346	346	NA	191	201	NA	173	173	NA	222	226	NA	154	156	NA
2023-PLATE-49_2022-2345_187-Pressure_0PSI_R2_062	0 PSI	275	283	NA	124	148	NA	327	343	NA	224	224	NA	206	234	NA	140	144	NA	196	200	NA	103	115	NA	187	197	NA	365	365	NA	372	372	NA	346	352	NA	191	201	NA	175	175	NA	NA	NA	NA	154	168	NA
2023-PLATE-49_2022-2345_188-Pressure_0PSI_R2_063	0 PSI	279	283	NA	124	148	NA	343	343	NA	224	249	NA	222	242	NA	140	144	NA	196	200	NA	103	115	NA	195	197	NA	359	365	NA	372	372	NA	346	346	NA	191	191	NA	173	173	NA	222	226	NA	154	168	NA
2023-PLATE-49_2022-2345_189-Pressure_0PSI_R2_064	0 PSI	279	283	NA	124	164	NA	319	343	NA	224	249	NA	222	234	NA	140	140	NA	200	208	NA	103	115	NA	187	197	NA	359	363	NA	336	364	NA	346	360	NA	191	197	NA	173	175	NA	222	226	NA	156	168	NA
2023-PLATE-49_2022-2345_190-Pressure_0PSI_R2_065	0 PSI	267	279	NA	148	152	NA	343	343	NA	224	244	NA	222	234	NA	140	140	NA	200	208	NA	103	115	NA	197	197	NA	363	365	NA	372	372	NA	346	346	NA	191	197	NA	173	173	NA	220	222	NA	168	168	NA
2023-PLATE-49_2022-2345_191-Pressure_0PSI_R2_066	0 PSI	275	283	NA	124	148	NA	319	339	NA	224	244	NA	234	246	NA	140	144	NA	208	224	NA	103	115	NA	187	193	NA	359	359	NA	336	344	NA	346	360	NA	191	197	NA	173	173	NA	220	222	NA	156	156	NA
2023-PLATE-49_2022-2345_192-Pressure_0PSI_R2_067	0 PSI	275	283	NA	124	148	NA	343	343	NA	224	249	NA	234	234	NA	140	144	NA	196	200	NA	115	115	NA	197	197	NA	359	363	NA	364	372	NA	346	346	NA	191	201	NA	173	175	NA	222	226	NA	154	168	NA
2023-PLATE-49_2022-2345_193-Pressure_0PSI_R2_068	0 PSI	275	283	NA	124	148	NA	339	343	NA	224	244	NA	242	246	NA	140	144	NA	208	224	NA	115	115	NA	195	197	NA	359	365	NA	344	372	NA	346	346	NA	191	201	NA	173	175	NA	220	222	NA	156	156	NA
2023-PLATE-49_2022-2345_194-Pressure_0PSI_R2_069	0 PSI	267	275	NA	152	164	NA	327	343	NA	NA	NA	NA	234	238	NA	140	140	NA	188	208	NA	103	103	NA	193	197	NA	363	365	NA	344	372	NA	352	360	NA	197	197	NA	173	175	NA	222	222	NA	154	168	NA
2023-PLATE-49_2022-2345_195-Pressure_0PSI_R2_070	0 PSI	275	283	NA	148	152	NA	343	343	NA	224	244	NA	234	234	NA	140	144	NA	196	200	NA	103	115	NA	187	197	NA	359	363	NA	336	364	NA	346	360	NA	191	191	NA	173	173	NA	220	222	NA	168	168	NA
2023-PLATE-49_2022-2345_196-Pressure_0PSI_R2_071	0 PSI	267	275	NA	124	164	NA	319	343	NA	224	244	NA	234	242	NA	140	140	NA	196	200	NA	115	115	NA	195	197	NA	359	365	NA	364	372	NA	346	360	NA	191	197	NA	173	173	NA	222	226	NA	154	156	NA
2023-PLATE-49_2022-2345_197-Pressure_0PSI_R2_072	0 PSI	279	283	NA	148	152	NA	343	343	NA	224	244	NA	234	234	NA	140	140	NA	196	200	NA	103	115	NA	197	197	NA	359	363	NA	364	372	NA	346	360	NA	197	201	NA	173	175	NA	220	222	NA	168	168	NA
2023-PLATE-49_2022-2345_198-Pressure_0PSI_R2_073	0 PSI	267	275	NA	148	152	NA	343	343	NA	224	249	NA	234	234	NA	140	140	NA	200	208	NA	103	115	NA	197	197	NA	359	363	NA	364	372	NA	346	360	NA	191	197	NA	173	175	NA	220	222	NA	154	168	NA
2023-PLATE-49_2022-2345_199-Pressure_0PSI_R2_074	0 PSI	275	283	NA	124	164	NA	343	343	NA	NA	NA	NA	206	242	NA	140	140	NA	188	208	NA	103	115	NA	187	197	NA	365	365	NA	372	372	NA	352	360	NA	197	201	NA	175	175	NA	220	222	NA	154	168	NA
2023-PLATE-49_2022-2345_200-Pressure_0PSI_R2_075	0 PSI	275	283	NA	124	148	NA	319	327	NA	224	224	NA	206	242	NA	140	140	NA	200	208	NA	103	115	NA	187	187	NA	359	365	NA	336	344	NA	346	352	NA	197	197	NA	173	173	NA	220	222	NA	154	156	NA
2023-PLATE-49_2022-2345_201-Pressure_0PSI_R2_076	0 PSI	267	275	NA	124	164	NA	319	343	NA	NA	NA	NA	222	242	NA	140	140	NA	196	200	NA	115	115	NA	187	195	NA	363	365	NA	336	372	NA	346	360	NA	191	197	NA	173	173	NA	222	226	NA	154	156	NA
2023-PLATE-49_2022-2345_202-Pressure_0PSI_R2_077	0 PSI	275	283	NA	124	148	NA	343	343	NA	224	244	NA	222	234	NA	140	140	NA	200	208	NA	115	115	NA	195	197	NA	359	359	NA	372	372	NA	346	360	NA	197	201	NA	173	175	NA	222	226	NA	168	168	NA
2023-PLATE-49_2022-2345_203-Pressure_0PSI_R2_078	0 PSI	267	275	NA	NA	NA	NA	327	343	NA	NA	NA	NA	234	238	NA	140	140	NA	200	208	NA	103	115	NA	193	197	NA	363	365	NA	372	372	NA	346	352	NA	197	201	NA	173	175	NA	220	222	NA	154	156	NA
2023-PLATE-49_2022-2345_204-Pressure_0PSI_R2_079	0 PSI	267	275	NA	148	152	NA	343	343	NA	NA	NA	NA	206	242	NA	140	140	NA	196	200	NA	115	115	NA	193	197	NA	359	365	NA	344	372	NA	346	352	NA	197	197	NA	175	175	NA	222	222	NA	154	168	NA
2023-PLATE-49_2022-2345_205-Pressure_0PSI_R2_080	0 PSI	275	283	NA	152	164	NA	319	339	NA	224	244	NA	238	242	NA	140	144	NA	208	224	NA	103	115	NA	195	197	NA	359	365	NA	344	372	NA	352	360	NA	191	197	NA	173	173	NA	220	222	NA	156	156	NA
2023-PLATE-49_2022-2345_206-Pressure_0PSI_R2_081	0 PSI	275	283	NA	124	164	NA	343	343	NA	NA	NA	NA	206	234	NA	140	144	NA	196	200	NA	103	115	NA	187	187	NA	359	365	NA	336	372	NA	360	360	NA	191	201	NA	175	175	NA	220	222	NA	154	168	NA
2023-PLATE-49_2022-2345_207-Pressure_0PSI_R2_082	0 PSI	267	275	NA	152	164	NA	343	343	NA	224	224	NA	206	242	NA	140	144	NA	188	208	NA	103	115	NA	187	187	NA	359	365	NA	336	372	NA	352	360	NA	191	201	NA	175	175	NA	220	222	NA	154	156	NA
2023-PLATE-49_2022-2345_208-Pressure_0PSI_R2_083	0 PSI	267	275	NA	152	164	NA	319	327	NA	224	224	NA	206	234	NA	140	144	NA	188	196	NA	103	115	NA	193	197	NA	359	363	NA	344	372	NA	346	360	NA	191	197	NA	175	175	NA	220	222	NA	154	168	NA
2023-PLATE-49_2022-2345_209-Pressure_0PSI_R2_084	0 PSI	267	275	NA	124	148	NA	319	327	NA	NA	NA	NA	234	238	NA	140	140	NA	200	208	NA	103	103	NA	187	193	NA	359	363	NA	336	344	NA	346	352	NA	197	201	NA	173	173	NA	220	222	NA	154	156	NA
2023-PLATE-49_2022-2345_210-Pressure_0PSI_R2_085	0 PSI	275	283	NA	152	164	NA	339	343	NA	224	244	NA	234	246	NA	140	140	NA	192	208	NA	115	115	NA	193	197	NA	359	365	NA	352	372	NA	346	352	NA	197	197	NA	173	175	NA	220	222	NA	156	156	NA
2023-PLATE-49_2022-2345_211-Pressure_0PSI_R2_086	0 PSI	275	283	NA	124	148	NA	339	343	NA	224	244	NA	234	238	NA	140	140	NA	192	208	NA	115	115	NA	195	197	NA	359	359	NA	352	372	NA	346	352	NA	197	201	NA	173	173	NA	220	222	NA	156	156	NA
2023-PLATE-49_2022-2345_212-Pressure_0PSI_R2_087	0 PSI	267	275	NA	152	164	NA	343	343	NA	224	244	NA	234	234	NA	140	144	NA	200	208	NA	115	115	NA	187	197	NA	359	363	NA	336	372	NA	346	360	NA	191	201	NA	173	175	NA	220	222	NA	156	168	NA
2023-PLATE-49_2022-2345_213-Pressure_0PSI_R2_088	0 PSI	279	283	NA	152	164	NA	319	343	NA	224	249	NA	234	242	NA	140	144	NA	200	208	NA	115	115	NA	187	195	NA	359	363	NA	336	372	NA	346	360	NA	191	201	NA	173	173	NA	222	226	NA	156	168	NA
2023-PLATE-49_2022-2345_214-Pressure_0PSI_R2_089	0 PSI	267	275	NA	124	148	NA	315	343	NA	224	244	NA	234	246	NA	140	140	NA	196	224	NA	103	115	NA	195	197	NA	359	365	NA	352	372	NA	352	360	NA	197	197	NA	173	175	NA	220	222	NA	156	156	NA
2023-PLATE-49_2022-2345_215-Pressure_0PSI_R2_090	0 PSI	275	283	NA	124	164	NA	315	343	NA	224	244	NA	234	238	NA	140	144	NA	192	196	NA	103	115	NA	187	193	NA	359	365	NA	336	344	NA	352	360	NA	191	197	NA	173	173	NA	220	222	NA	156	156	NA
2023-PLATE-49_2022-2345_216-Pressure_0PSI_R2_091	0 PSI	267	275	NA	148	152	NA	343	343	NA	224	249	NA	234	234	NA	140	140	NA	196	200	NA	103	115	NA	187	195	NA	359	359	NA	336	372	NA	346	360	NA	191	197	NA	173	173	NA	220	222	NA	154	168	NA
2023-PLATE-49_2022-2345_217-Pressure_0PSI_R2_092	0 PSI	275	283	NA	124	148	NA	319	327	NA	224	224	NA	234	238	NA	140	140	NA	188	208	NA	103	115	NA	187	197	NA	365	365	NA	372	372	NA	360	360	NA	197	201	NA	175	175	NA	222	222	NA	154	156	NA
2023-PLATE-49_2022-2345_218-Pressure_0PSI_R2_093	0 PSI	275	283	NA	148	152	NA	319	327	NA	224	224	NA	206	242	NA	140	140	NA	196	200	NA	103	103	NA	187	193	NA	359	363	NA	336	372	NA	346	360	NA	197	197	NA	173	175	NA	222	222	NA	154	168	NA
2023-PLATE-49_2022-2345_219-Pressure_0PSI_R2_094	0 PSI	267	279	NA	148	152	NA	319	343	NA	224	244	NA	222	242	NA	140	140	NA	196	200	NA	115	115	NA	195	197	NA	359	365	NA	372	372	NA	346	346	NA	197	201	NA	173	173	NA	222	226	NA	154	156	NA
2023-PLATE-49_2022-2345_220-Pressure_0PSI_R2_095	0 PSI	275	283	NA	148	152	NA	327	343	NA	224	224	NA	206	242	NA	140	140	NA	188	208	NA	115	115	NA	187	193	NA	359	363	NA	336	344	NA	346	352	NA	197	201	NA	173	173	NA	220	222	NA	154	168	NA
2023-PLATE-49_2022-2345_221-Pressure_0PSI_R2_096	0 PSI	267	275	NA	152	164	NA	319	343	NA	224	224	NA	206	242	NA	140	140	NA	188	208	NA	115	115	NA	193	197	NA	363	365	NA	344	372	NA	346	360	NA	197	201	NA	175	175	NA	222	222	NA	154	168	NA
2023-PLATE-49_2022-2345_222-Pressure_0PSI_R2_097	0 PSI	275	283	NA	124	148	NA	319	343	NA	224	224	NA	206	242	NA	140	144	NA	200	208	NA	103	115	NA	193	197	NA	359	363	NA	344	372	NA	360	360	NA	191	201	NA	175	175	NA	222	222	NA	154	168	NA
2023-PLATE-49_2022-2345_223-Pressure_0PSI_R2_098	0 PSI	279	283	NA	124	148	NA	343	343	NA	224	249	NA	222	242	NA	140	140	NA	200	208	NA	103	115	NA	197	197	NA	359	365	NA	364	372	NA	346	346	NA	191	197	NA	173	173	NA	222	226	NA	154	156	NA
2023-PLATE-49_2022-2345_224-Pressure_0PSI_R2_099	0 PSI	275	283	NA	124	148	NA	343	343	NA	224	249	NA	222	242	NA	140	144	NA	200	208	NA	103	115	NA	187	195	NA	359	359	NA	336	372	NA	346	346	NA	191	201	NA	173	173	NA	220	222	NA	154	168	NA
2023-PLATE-49_2022-2345_225-Pressure_0PSI_R2_100	0 PSI	275	283	NA	148	152	NA	315	343	NA	224	244	NA	238	242	NA	140	144	NA	192	208	NA	115	115	NA	195	197	NA	359	365	NA	344	372	NA	346	346	NA	191	197	NA	173	173	NA	220	222	NA	156	168	NA
2023-PLATE-49_2022-2345_226-Pressure_0PSI_R2_101	0 PSI	267	279	NA	124	148	NA	319	343	NA	224	249	NA	222	242	NA	140	144	NA	196	200	NA	103	115	NA	187	195	NA	359	365	NA	336	372	NA	346	346	NA	191	201	NA	173	175	NA	220	222	NA	156	168	NA
2023-PLATE-49_2022-2345_227-Pressure_0PSI_R2_102	0 PSI	267	275	NA	124	164	NA	327	343	NA	NA	NA	NA	206	242	NA	140	140	NA	196	200	NA	103	115	NA	187	197	NA	363	365	NA	372	372	NA	346	352	NA	197	197	NA	173	175	NA	222	222	NA	154	156	NA
2023-PLATE-49_2022-2345_228-Pressure_0PSI_R2_103	0 PSI	275	283	NA	152	164	NA	343	343	NA	224	244	NA	234	234	NA	140	140	NA	196	200	NA	103	115	NA	187	195	NA	359	359	NA	336	372	NA	346	360	NA	NA	NA	NA	173	175	NA	222	226	NA	154	168	NA
2023-PLATE-49_2022-2345_229-Pressure_0PSI_R2_104	0 PSI	279	283	NA	148	152	NA	319	343	NA	224	244	NA	234	234	NA	140	144	NA	200	208	NA	103	115	NA	197	197	NA	363	365	NA	364	372	NA	346	346	NA	191	201	NA	173	173	NA	222	226	NA	154	156	NA
2023-PLATE-49_2022-2345_230-Pressure_0PSI_R2_105	0 PSI	267	275	NA	124	164	NA	319	343	NA	NA	NA	NA	206	242	NA	140	144	NA	196	200	NA	103	115	NA	187	193	NA	359	363	NA	336	344	NA	346	360	NA	191	197	NA	173	173	NA	220	222	NA	154	156	NA
2023-PLATE-49_2022-2345_231-Pressure_0PSI_R2_106	0 PSI	267	275	NA	148	152	NA	343	343	NA	224	224	NA	206	242	NA	140	140	NA	188	196	NA	103	115	NA	187	187	NA	359	365	NA	336	344	NA	346	352	NA	197	197	NA	173	173	NA	222	222	NA	154	168	NA
2023-PLATE-49_2022-2345_232-Pressure_0PSI_R2_107	0 PSI	275	283	NA	124	148	NA	339	343	NA	224	244	NA	242	246	NA	140	140	NA	192	208	NA	115	115	NA	193	197	NA	359	359	NA	344	372	NA	346	346	NA	197	201	NA	173	175	NA	220	222	NA	156	168	NA
2023-PLATE-49_2022-2345_233-Pressure_0PSI_R2_108	0 PSI	267	279	NA	124	148	NA	343	343	NA	224	249	NA	222	234	NA	140	144	NA	196	200	NA	115	115	NA	187	197	NA	359	363	NA	336	364	NA	346	360	NA	191	191	NA	173	175	NA	222	226	NA	154	156	NA
2023-PLATE-49_2022-2345_234-Pressure_0PSI_R2_109	0 PSI	267	279	NA	124	148	NA	343	343	NA	224	244	NA	222	234	NA	140	144	NA	200	208	NA	103	115	NA	197	197	NA	363	365	NA	364	372	NA	346	346	NA	191	201	NA	173	173	NA	220	222	NA	154	168	NA
2023-PLATE-49_2022-2345_235-Pressure_0PSI_R2_110	0 PSI	267	275	NA	124	164	NA	319	339	NA	224	244	NA	242	246	NA	140	144	NA	192	196	NA	103	115	NA	187	195	NA	359	359	NA	336	344	NA	346	346	NA	191	197	NA	173	173	NA	220	222	NA	156	168	NA
2023-PLATE-49_2022-2345_236-Pressure_0PSI_R2_111	0 PSI	267	275	NA	124	164	NA	339	343	NA	224	244	NA	238	242	NA	140	140	NA	208	224	NA	115	115	NA	187	193	NA	359	365	NA	336	352	NA	352	360	NA	197	197	NA	173	173	NA	220	222	NA	156	156	NA
2023-PLATE-49_2022-2345_237-Pressure_0PSI_R2_112	0 PSI	279	283	NA	148	152	NA	319	343	NA	224	244	NA	222	234	NA	140	144	NA	196	200	NA	103	115	NA	187	195	NA	359	359	NA	336	372	NA	346	360	NA	191	201	NA	173	173	NA	222	226	NA	156	168	NA
2023-PLATE-49_2022-2345_238-Pressure_0PSI_R2_113	0 PSI	267	275	NA	152	164	NA	319	343	NA	NA	NA	NA	206	234	NA	140	140	NA	196	200	NA	103	115	NA	187	197	NA	365	365	NA	372	372	NA	360	360	NA	197	197	NA	173	173	NA	222	222	NA	154	156	NA
2023-PLATE-49_2022-2345_239-Pressure_0PSI_R2_114	0 PSI	275	283	NA	148	152	NA	319	343	NA	NA	NA	NA	206	242	NA	140	144	NA	196	200	NA	103	103	NA	193	197	NA	359	363	NA	344	372	NA	346	360	NA	191	197	NA	173	173	NA	220	222	NA	154	156	NA
2023-PLATE-49_2022-2345_240-Pressure_0PSI_R2_115	0 PSI	267	275	NA	152	164	NA	315	343	NA	224	244	NA	234	238	NA	140	140	NA	192	208	NA	115	115	NA	195	197	NA	359	365	NA	352	372	NA	346	352	NA	197	201	NA	173	173	NA	220	222	NA	156	156	NA
2023-PLATE-49_2022-2345_241-Pressure_0PSI_R2_116	0 PSI	275	283	NA	152	164	NA	319	343	NA	224	224	NA	238	242	NA	140	140	NA	196	200	NA	115	115	NA	187	197	NA	365	365	NA	344	372	NA	352	360	NA	197	201	NA	173	173	NA	220	222	NA	154	168	NA
2023-PLATE-49_2022-2345_242-Pressure_0PSI_R2_117	0 PSI	275	283	NA	124	148	NA	315	343	NA	224	244	NA	234	246	NA	140	144	NA	208	224	NA	103	115	NA	187	195	NA	359	359	NA	336	344	NA	346	352	NA	191	201	NA	173	173	NA	220	222	NA	156	156	NA
2023-PLATE-49_2022-2345_243-Pressure_0PSI_R2_118	0 PSI	267	275	NA	148	152	NA	343	343	NA	224	224	NA	234	238	NA	140	140	NA	200	208	NA	115	115	NA	193	197	NA	363	365	NA	344	372	NA	352	360	NA	197	197	NA	173	175	NA	220	222	NA	154	168	NA
2023-PLATE-49_2022-2345_244-Pressure_0PSI_R2_119	0 PSI	279	283	NA	124	164	NA	319	343	NA	224	249	NA	234	242	NA	140	144	NA	200	208	NA	103	115	NA	197	197	NA	363	365	NA	364	372	NA	346	360	NA	191	201	NA	173	173	NA	220	222	NA	156	168	NA
2023-PLATE-49_2022-2345_245-Pressure_0PSI_R2_120	0 PSI	NA	NA	NA	NA	NA	NA	NA	NA	NA	NA	NA	NA	206	242	NA	140	144	NA	188	208	NA	103	103	NA	187	197	NA	365	365	NA	372	372	NA	346	360	NA	191	197	NA	175	175	NA	222	222	NA	154	168	NA
2023-PLATE-49_2022-2345_246-Pressure_0PSI_R2_121	0 PSI	275	283	NA	148	152	NA	315	319	NA	224	244	NA	238	242	NA	140	144	NA	196	224	NA	115	115	NA	187	193	NA	359	359	NA	336	344	NA	346	352	NA	191	197	NA	173	175	NA	220	222	NA	156	156	NA
2023-PLATE-49_2022-2345_247-Pressure_0PSI_R2_122	0 PSI	267	275	NA	148	152	NA	319	327	NA	224	224	NA	206	234	NA	140	144	NA	188	196	NA	103	115	NA	187	187	NA	359	365	NA	336	344	NA	346	352	NA	191	197	NA	173	173	NA	220	222	NA	154	156	NA
2023-PLATE-49_2022-2345_248-Pressure_0PSI_R2_123	0 PSI	275	283	NA	124	164	NA	319	339	NA	224	244	NA	242	246	NA	140	144	NA	208	224	NA	115	115	NA	195	197	NA	359	365	NA	352	372	NA	346	346	NA	191	201	NA	173	175	NA	220	222	NA	156	156	NA
2023-PLATE-49_2022-2345_249-Pressure_0PSI_R2_124	0 PSI	267	275	NA	124	148	NA	319	327	NA	224	224	NA	206	242	NA	140	144	NA	188	208	NA	115	115	NA	193	197	NA	363	365	NA	344	372	NA	346	352	NA	191	201	NA	173	173	NA	222	222	NA	154	156	NA
2023-PLATE-104_2022-2345_250-Pressure_0PSI_R2_125	0 PSI	279	283	NA	152	164	NA	319	327	NA	224	224	NA	234	238	NA	140	140	NA	200	208	NA	103	115	NA	193	197	NA	363	365	NA	NA	NA	NA	352	360	NA	197	201	NA	173	175	NA	222	222	NA	154	168	NA
2023-PLATE-104_2023-435_1-Pressure_6500PSI_R1_001	6500 PSI	267	275	NA	124	148	NA	319	343	NA	224	244	NA	222	242	NA	140	144	NA	196	200	NA	103	115	NA	187	195	NA	359	365	NA	336	372	NA	346	360	NA	191	191	NA	173	175	NA	220	222	NA	156	168	NA
2023-PLATE-104_2023-435_10-Pressure_6500PSI_R1_015	6500 PSI	267	279	NA	152	164	NA	319	343	NA	224	244	NA	234	234	NA	140	144	NA	196	200	NA	103	115	NA	187	195	NA	359	365	NA	336	372	NA	346	346	NA	191	201	NA	173	173	NA	222	222	NA	168	168	NA
2023-PLATE-104_2023-435_11-Pressure_6500PSI_R1_017	6500 PSI	267	275	NA	124	164	NA	319	339	NA	224	244	NA	234	238	NA	140	140	NA	192	196	NA	115	115	NA	187	193	NA	359	359	NA	336	352	NA	346	346	NA	197	197	NA	173	173	NA	220	222	NA	156	156	NA
2023-PLATE-104_2023-435_12-Pressure_6500PSI_R1_018	6500 PSI	267	275	NA	148	152	NA	319	343	NA	NA	NA	NA	206	242	NA	140	140	NA	188	208	NA	103	115	NA	187	193	NA	359	363	NA	336	344	NA	352	360	NA	197	201	NA	175	175	NA	220	222	NA	154	168	NA
2023-PLATE-104_2023-435_13-Pressure_6500PSI_R1_019	6500 PSI	267	275	275	124	148	164	315	319	339	224	244	244	238	242	246	140	140	144	192	208	224	103	115	115	193	195	197	359	359	NA	344	352	372	346	346	352	191	201	201	173	173	NA	220	220	222	156	156	NA
2023-PLATE-104_2023-435_14-Pressure_6500PSI_R1_020	6500 PSI	275	283	NA	148	152	NA	319	343	NA	224	244	NA	234	242	NA	140	144	NA	200	208	NA	115	115	NA	195	197	NA	359	365	NA	372	372	NA	346	346	NA	191	191	NA	173	173	NA	222	226	NA	154	168	NA
2023-PLATE-104_2023-435_15-Pressure_6500PSI_R1_021	6500 PSI	275	275	283	148	152	164	315	339	343	224	244	244	238	242	246	140	140	144	192	196	224	103	115	115	193	195	197	359	359	365	344	352	372	346	346	352	191	197	201	173	173	175	220	220	222	156	156	168
2023-PLATE-104_2023-435_16-Pressure_6500PSI_R1_022	6500 PSI	267	279	NA	152	164	NA	343	343	NA	224	244	NA	222	242	NA	140	144	NA	196	200	NA	115	115	NA	187	195	NA	363	365	NA	336	372	NA	346	346	NA	191	201	NA	173	175	NA	220	222	NA	154	156	NA
2023-PLATE-104_2023-435_17-Pressure_6500PSI_R1_024	6500 PSI	267	275	NA	124	164	NA	319	327	NA	224	224	NA	238	242	NA	140	144	NA	196	200	NA	103	115	NA	187	193	NA	359	363	NA	336	344	NA	352	360	NA	191	201	NA	173	175	NA	222	222	NA	154	168	NA
2023-PLATE-104_2023-435_18-Pressure_6500PSI_R1_025	6500 PSI	267	275	NA	124	164	NA	319	339	NA	224	244	NA	242	246	NA	140	140	NA	208	224	NA	103	115	NA	187	195	NA	359	359	NA	336	352	NA	346	360	NA	197	201	NA	173	175	NA	220	222	NA	156	156	NA
2023-PLATE-104_2023-435_19-Pressure_6500PSI_R1_026	6500 PSI	275	283	NA	124	148	NA	319	343	NA	224	224	NA	234	238	NA	140	140	NA	196	200	NA	115	115	NA	187	193	NA	363	365	NA	336	372	NA	346	352	NA	197	201	NA	173	175	NA	220	222	NA	154	156	NA
2023-PLATE-104_2023-435_2-Pressure_6500PSI_R1_003	6500 PSI	275	283	NA	148	152	NA	319	343	NA	224	224	NA	206	242	NA	140	144	NA	196	200	NA	103	115	NA	187	197	NA	365	365	NA	372	372	NA	346	352	NA	191	197	NA	173	173	NA	222	222	NA	154	168	NA
2023-PLATE-104_2023-435_20-Pressure_6500PSI_R1_027	6500 PSI	267	275	NA	124	148	NA	319	327	NA	224	224	NA	206	242	NA	140	140	NA	188	208	NA	103	115	NA	187	193	NA	359	363	NA	336	372	NA	352	360	NA	197	197	NA	173	175	NA	220	222	NA	154	168	NA
2023-PLATE-104_2023-435_21-Pressure_6500PSI_R1_028	6500 PSI	279	283	NA	124	164	NA	319	343	NA	224	244	NA	222	242	NA	140	144	NA	200	208	NA	103	115	NA	187	195	NA	359	359	NA	336	372	NA	346	346	NA	191	201	NA	173	173	NA	220	222	NA	154	156	NA
2023-PLATE-104_2023-435_22-Pressure_6500PSI_R1_029	6500 PSI	279	283	NA	124	164	NA	319	343	NA	224	249	NA	222	242	NA	140	144	NA	200	208	NA	103	115	NA	197	197	NA	359	359	NA	364	372	NA	346	346	NA	191	191	NA	173	175	NA	222	226	NA	156	168	NA
2023-PLATE-104_2023-435_23-Pressure_6500PSI_R1_030	6500 PSI	267	279	NA	152	164	NA	343	343	NA	224	249	NA	222	242	NA	140	144	NA	196	200	NA	115	115	NA	197	197	NA	363	365	NA	364	372	NA	346	346	NA	191	191	NA	173	175	NA	220	222	NA	154	156	NA
2023-PLATE-104_2023-435_24-Pressure_6500PSI_R1_032	6500 PSI	275	283	NA	124	164	NA	343	343	NA	224	249	NA	234	234	NA	140	144	NA	196	200	NA	103	115	NA	187	197	NA	363	365	NA	336	364	NA	346	360	NA	191	191	NA	173	175	NA	222	226	NA	168	168	NA
2023-PLATE-104_2023-435_25-Pressure_6500PSI_R1_033	6500 PSI	275	283	NA	148	152	NA	319	343	NA	NA	NA	NA	234	234	NA	140	140	NA	196	200	NA	NA	NA	NA	195	197	NA	359	365	NA	372	372	NA	346	346	NA	191	197	NA	173	175	NA	220	222	NA	154	156	NA
2023-PLATE-104_2023-435_26-Pressure_6500PSI_R1_034	6500 PSI	NA	NA	NA	NA	NA	NA	NA	NA	NA	NA	NA	NA	NA	NA	NA	NA	NA	NA	NA	NA	NA	NA	NA	NA	NA	NA	NA	NA	NA	NA	NA	NA	NA	NA	NA	NA	NA	NA	NA	NA	NA	NA	NA	NA	NA	NA	NA	NA
2023-PLATE-104_2023-435_27-Pressure_6500PSI_R1_036	6500 PSI	279	283	NA	124	164	NA	343	343	NA	224	244	NA	222	242	NA	140	144	NA	196	200	NA	NA	NA	NA	187	197	NA	359	363	NA	336	364	NA	346	346	NA	191	201	NA	173	175	NA	222	226	NA	168	168	NA
2023-PLATE-104_2023-435_28-Pressure_6500PSI_R1_037	6500 PSI	275	283	NA	124	148	NA	319	343	NA	224	244	NA	234	234	NA	140	140	NA	196	200	NA	NA	NA	NA	187	197	NA	359	359	NA	336	364	NA	346	346	NA	197	201	NA	173	173	NA	222	226	NA	168	168	NA
2023-PLATE-104_2023-435_29-Pressure_6500PSI_R1_038	6500 PSI	279	283	NA	152	164	NA	319	343	NA	224	244	NA	222	234	NA	140	140	NA	196	200	NA	103	115	NA	195	197	NA	363	365	NA	372	372	NA	346	360	NA	191	197	NA	173	175	NA	222	226	NA	154	168	NA
2023-PLATE-104_2023-435_3-Pressure_6500PSI_R1_004	6500 PSI	279	283	NA	152	164	NA	319	343	NA	224	249	NA	234	242	NA	140	144	NA	196	200	NA	115	115	NA	195	197	NA	359	359	NA	364	372	NA	346	360	NA	191	201	NA	173	175	NA	222	226	NA	156	168	NA
2023-PLATE-104_2023-435_30-Pressure_6500PSI_R1_040	6500 PSI	275	283	NA	148	152	NA	315	319	NA	224	244	NA	238	242	NA	140	140	NA	196	224	NA	115	115	NA	193	197	NA	359	359	NA	344	372	NA	352	360	NA	197	201	NA	173	175	NA	220	222	NA	156	168	NA
2023-PLATE-104_2023-435_31-Pressure_6500PSI_R1_041	6500 PSI	275	283	NA	124	164	NA	315	343	NA	224	244	NA	234	238	NA	140	140	NA	208	224	NA	115	115	NA	195	197	NA	359	365	NA	352	372	NA	352	360	NA	197	197	NA	173	173	NA	220	222	NA	156	168	NA
2023-PLATE-104_2023-435_32-Pressure_6500PSI_R1_043	6500 PSI	275	283	NA	124	164	NA	315	343	NA	224	244	NA	234	238	246	140	140	NA	196	224	NA	103	115	NA	187	195	NA	359	359	NA	336	352	NA	346	352	NA	197	201	NA	173	173	NA	220	222	NA	156	168	NA
2023-PLATE-104_2023-435_33-Pressure_6500PSI_R1_045	6500 PSI	275	283	NA	124	148	NA	319	343	NA	224	244	NA	234	242	NA	140	144	NA	200	208	NA	103	115	NA	187	195	NA	359	365	NA	336	372	NA	346	360	NA	191	191	NA	173	175	NA	222	226	NA	156	168	NA
2023-PLATE-104_2023-435_34-Pressure_6500PSI_R1_046	6500 PSI	267	275	NA	152	164	NA	343	343	NA	224	249	NA	234	234	NA	140	144	NA	200	208	NA	103	115	NA	197	197	NA	359	365	NA	364	372	NA	346	346	NA	191	191	NA	NA	NA	NA	220	222	NA	154	168	NA
2023-PLATE-104_2023-435_35-Pressure_6500PSI_R1_048	6500 PSI	279	283	NA	124	148	NA	319	343	NA	224	244	NA	222	242	NA	140	144	NA	200	208	NA	115	115	NA	187	195	NA	359	359	NA	336	372	NA	346	360	NA	191	191	NA	173	173	NA	222	226	NA	168	168	NA
2023-PLATE-104_2023-435_36-Pressure_6500PSI_R1_049	6500 PSI	267	275	NA	152	164	NA	327	343	NA	NA	NA	NA	206	242	NA	140	144	NA	196	200	NA	103	115	NA	187	197	NA	359	363	NA	372	372	NA	346	360	NA	191	201	NA	173	173	NA	222	222	NA	154	156	NA
2023-PLATE-104_2023-435_37-Pressure_6500PSI_R1_050	6500 PSI	267	279	NA	148	152	NA	319	343	NA	224	249	NA	234	234	NA	140	144	NA	196	200	NA	103	115	NA	187	195	NA	359	365	NA	336	372	NA	346	346	NA	191	201	NA	173	175	NA	220	222	NA	154	168	NA
2023-PLATE-104_2023-435_38-Pressure_6500PSI_R1_051	6500 PSI	275	283	NA	124	148	NA	319	339	NA	224	244	NA	234	238	NA	140	144	NA	192	196	NA	115	115	NA	195	197	NA	359	365	NA	352	372	NA	352	360	NA	191	201	NA	173	175	NA	220	222	NA	156	156	NA
2023-PLATE-104_2023-435_39-Pressure_6500PSI_R1_052	6500 PSI	267	275	NA	124	148	NA	319	343	NA	224	244	NA	222	242	NA	140	140	NA	196	200	NA	115	115	NA	187	197	NA	359	363	NA	336	364	NA	346	346	NA	191	197	NA	173	175	NA	222	226	NA	154	168	NA
2023-PLATE-104_2023-435_4-Pressure_6500PSI_R1_005	6500 PSI	267	279	NA	124	164	NA	319	343	NA	224	249	NA	222	242	NA	140	144	NA	200	208	NA	115	115	NA	187	197	NA	359	363	NA	336	372	NA	346	346	NA	191	201	NA	173	175	NA	220	222	NA	168	168	NA
2023-PLATE-104_2023-435_40-Pressure_6500PSI_R1_053	6500 PSI	279	283	NA	124	164	NA	319	343	NA	224	244	NA	234	234	NA	140	140	NA	200	208	NA	103	115	NA	195	197	NA	359	365	NA	372	372	NA	346	360	NA	191	197	NA	173	173	NA	220	222	NA	154	156	NA
2023-PLATE-104_2023-435_41-Pressure_6500PSI_R1_054	6500 PSI	267	275	NA	148	152	NA	319	339	NA	224	244	NA	242	246	NA	140	144	NA	208	224	NA	115	115	NA	193	197	NA	359	365	NA	344	372	NA	346	352	NA	191	201	NA	173	175	NA	220	222	NA	156	156	NA
2023-PLATE-104_2023-435_42-Pressure_6500PSI_R1_055	6500 PSI	267	275	NA	148	152	NA	327	343	NA	NA	NA	NA	238	242	NA	140	144	NA	196	200	NA	115	115	NA	187	187	NA	359	365	NA	336	372	NA	360	360	NA	191	197	NA	175	175	NA	220	222	NA	154	168	NA
2023-PLATE-104_2023-435_43-Pressure_6500PSI_R1_056	6500 PSI	275	283	NA	124	148	NA	343	343	NA	224	244	NA	222	242	NA	140	140	NA	196	200	NA	115	115	NA	187	197	NA	363	365	NA	336	364	NA	346	346	NA	197	201	NA	173	173	NA	222	226	NA	154	168	NA
2023-PLATE-104_2023-435_44-Pressure_6500PSI_R1_058	6500 PSI	275	283	NA	152	164	NA	319	343	NA	224	249	NA	234	242	NA	140	144	NA	200	208	NA	103	115	NA	187	195	NA	359	363	NA	336	372	NA	346	360	NA	191	191	NA	173	173	NA	220	222	NA	154	168	NA
2023-PLATE-104_2023-435_45-Pressure_6500PSI_R1_060	6500 PSI	267	275	NA	148	152	NA	319	343	NA	224	249	NA	234	242	NA	140	144	NA	196	200	NA	103	115	NA	187	197	NA	363	365	NA	336	364	NA	346	346	NA	191	191	NA	173	173	NA	220	222	NA	154	168	NA
2023-PLATE-104_2023-435_46-Pressure_6500PSI_R1_061	6500 PSI	275	283	NA	152	164	NA	343	343	NA	224	244	NA	234	234	NA	140	140	NA	196	200	NA	103	115	NA	195	197	NA	359	365	NA	372	372	NA	346	346	NA	197	201	NA	173	173	NA	220	222	NA	154	156	NA
2023-PLATE-104_2023-435_47-Pressure_6500PSI_R1_062	6500 PSI	267	275	NA	124	148	NA	339	343	NA	224	244	NA	234	238	NA	140	144	NA	208	224	NA	115	115	NA	193	197	NA	359	365	NA	344	372	NA	346	352	NA	191	197	NA	173	175	NA	220	222	NA	156	156	NA
2023-PLATE-104_2023-435_48-Pressure_6500PSI_R1_063	6500 PSI	275	283	NA	124	148	NA	319	343	NA	NA	NA	NA	206	242	NA	140	144	NA	200	208	NA	NA	NA	NA	187	193	NA	359	363	NA	336	372	NA	352	360	NA	191	201	NA	173	173	NA	222	222	NA	154	168	NA
2023-PLATE-104_2023-435_49-Pressure_6500PSI_R1_064	6500 PSI	267	275	NA	152	164	NA	319	339	NA	224	244	NA	234	246	NA	140	140	NA	208	224	NA	115	115	NA	187	195	NA	359	365	NA	336	352	NA	346	346	NA	197	201	NA	173	173	NA	220	222	NA	156	156	NA
2023-PLATE-104_2023-435_5-Pressure_6500PSI_R1_008	6500 PSI	275	283	NA	148	152	NA	319	343	NA	224	244	NA	234	242	NA	140	144	NA	196	200	NA	103	115	NA	195	197	NA	359	363	NA	372	372	NA	346	346	NA	191	191	NA	173	175	NA	222	226	NA	168	168	NA
2023-PLATE-104_2023-435_50-Pressure_6500PSI_R1_067	6500 PSI	275	283	NA	124	164	NA	319	343	NA	224	249	NA	222	242	NA	140	144	NA	200	208	NA	103	115	NA	187	195	NA	359	359	NA	336	364	NA	346	360	NA	191	201	NA	173	173	NA	222	226	NA	168	168	NA
2023-PLATE-104_2023-435_51-Pressure_6500PSI_R1_068	6500 PSI	279	283	NA	124	164	NA	343	343	NA	224	249	NA	234	242	NA	140	140	NA	200	208	NA	103	115	NA	197	197	NA	363	365	NA	372	372	NA	346	360	NA	197	201	NA	173	175	NA	220	222	NA	154	156	NA
2023-PLATE-104_2023-435_52-Pressure_6500PSI_R1_069	6500 PSI	275	283	NA	124	164	NA	319	343	NA	224	249	NA	234	234	NA	140	140	NA	196	200	NA	115	115	NA	197	197	NA	359	363	NA	364	372	NA	346	346	NA	191	197	NA	173	173	NA	220	222	NA	168	168	NA
2023-PLATE-104_2023-435_53-Pressure_6500PSI_R1_070	6500 PSI	279	283	NA	124	164	NA	343	343	NA	224	244	NA	234	234	NA	140	140	NA	200	208	NA	115	115	NA	187	197	NA	359	363	NA	336	372	NA	346	346	NA	197	201	NA	173	173	NA	222	226	NA	154	168	NA
2023-PLATE-104_2023-435_54-Pressure_6500PSI_R1_071	6500 PSI	267	275	NA	152	164	NA	319	343	NA	224	224	NA	238	242	NA	140	140	NA	200	208	NA	103	103	NA	187	197	NA	359	363	NA	372	372	NA	352	360	NA	197	201	NA	173	175	NA	222	222	NA	154	156	NA
2023-PLATE-104_2023-435_55-Pressure_6500PSI_R1_072	6500 PSI	275	283	NA	124	148	NA	343	343	NA	224	224	NA	206	242	NA	140	140	NA	200	208	NA	103	115	NA	187	187	NA	365	365	NA	336	372	NA	360	360	NA	197	197	NA	173	175	NA	222	222	NA	154	168	NA
2023-PLATE-104_2023-435_56-Pressure_6500PSI_R1_075	6500 PSI	267	275	NA	124	148	NA	319	327	NA	NA	NA	NA	238	242	NA	140	144	NA	200	208	NA	115	115	NA	187	187	NA	365	365	NA	336	372	NA	360	360	NA	191	201	NA	173	175	NA	220	222	NA	154	156	NA
2023-PLATE-104_2023-435_57-Pressure_6500PSI_R1_076	6500 PSI	267	275	NA	152	164	NA	343	343	NA	224	224	NA	206	242	NA	140	144	NA	188	196	NA	103	115	NA	187	197	NA	365	365	NA	372	372	NA	346	360	NA	191	197	NA	173	175	NA	220	222	NA	154	168	NA
2023-PLATE-104_2023-435_58-Pressure_6500PSI_R1_077	6500 PSI	267	275	NA	124	148	NA	327	343	NA	NA	NA	NA	234	238	NA	140	140	NA	200	208	NA	103	115	NA	193	197	NA	363	365	NA	372	372	NA	346	352	NA	197	197	NA	173	175	NA	220	222	NA	154	168	NA
2023-PLATE-104_2023-435_59-Pressure_6500PSI_R1_078	6500 PSI	275	283	NA	148	152	NA	319	327	NA	NA	NA	NA	234	238	NA	140	140	NA	188	208	NA	NA	NA	NA	187	193	NA	359	363	NA	336	372	NA	346	352	NA	197	201	NA	173	175	NA	220	222	NA	154	156	NA
2023-PLATE-104_2023-435_6-Pressure_6500PSI_R1_009	6500 PSI	267	275	NA	152	164	NA	319	343	NA	224	224	NA	206	234	NA	140	144	NA	196	200	NA	NA	NA	NA	193	197	NA	363	365	NA	344	372	NA	346	360	NA	191	201	NA	173	173	NA	220	222	NA	154	168	NA
2023-PLATE-104_2023-435_60-Pressure_6500PSI_R1_080	6500 PSI	275	283	NA	124	164	NA	343	343	NA	NA	NA	NA	206	234	NA	140	144	NA	196	200	NA	103	115	NA	187	197	NA	365	365	NA	372	372	NA	346	352	NA	191	197	NA	175	175	NA	222	222	NA	154	168	NA
2023-PLATE-104_2023-435_61-Pressure_6500PSI_R1_082	6500 PSI	267	275	NA	124	148	NA	343	343	NA	224	224	NA	238	242	NA	140	144	NA	196	200	NA	103	115	NA	193	197	NA	NA	NA	NA	NA	NA	NA	NA	NA	NA	NA	NA	NA	NA	NA	NA	NA	NA	NA	NA	NA	NA
2023-PLATE-104_2023-435_62-Pressure_6500PSI_R1_084	6500 PSI	279	283	NA	124	164	NA	319	343	NA	224	244	NA	222	234	NA	140	140	NA	196	200	NA	115	115	NA	187	195	NA	359	365	NA	336	372	NA	346	346	NA	191	197	NA	173	173	NA	222	226	NA	168	168	NA
2023-PLATE-104_2023-435_63-Pressure_6500PSI_R1_085	6500 PSI	267	275	NA	152	164	NA	315	319	NA	224	244	NA	242	246	NA	140	144	NA	196	224	NA	115	115	NA	187	195	NA	359	359	NA	336	352	NA	346	360	NA	191	197	NA	173	173	NA	220	222	NA	156	168	NA
2023-PLATE-104_2023-435_64-Pressure_6500PSI_R1_086	6500 PSI	267	279	NA	124	148	NA	319	343	NA	224	249	NA	234	242	NA	140	144	NA	196	200	NA	115	115	NA	197	197	NA	363	365	NA	364	372	NA	346	360	NA	191	201	NA	173	173	NA	222	226	NA	154	156	NA
2023-PLATE-104_2023-435_65-Pressure_6500PSI_R1_087	6500 PSI	275	275	283	148	152	164	315	319	339	224	244	244	238	242	246	140	140	NA	192	196	224	103	115	115	187	193	195	359	359	NA	336	344	352	346	352	360	197	197	201	173	173	NA	220	220	222	156	156	NA
2023-PLATE-104_2023-435_66-Pressure_6500PSI_R1_088	6500 PSI	275	283	NA	152	164	NA	319	327	NA	NA	NA	NA	206	234	NA	140	144	NA	196	200	NA	103	115	NA	187	187	NA	359	365	NA	336	372	NA	346	360	NA	191	201	NA	173	175	NA	222	222	NA	154	168	NA
2023-PLATE-104_2023-435_67-Pressure_6500PSI_R1_089	6500 PSI	275	283	NA	148	152	NA	319	327	NA	224	224	NA	206	242	NA	140	140	NA	188	196	NA	103	103	NA	187	193	NA	363	365	NA	336	344	NA	346	360	NA	197	197	NA	173	175	NA	222	222	NA	154	156	NA
2023-PLATE-104_2023-435_68-Pressure_6500PSI_R1_090	6500 PSI	275	283	NA	152	164	NA	319	327	NA	NA	NA	NA	238	242	NA	140	144	NA	200	208	NA	103	115	NA	193	197	NA	363	365	NA	344	372	NA	352	360	NA	191	201	NA	175	175	NA	220	222	NA	154	168	NA
2023-PLATE-104_2023-435_69-Pressure_6500PSI_R1_091	6500 PSI	275	283	NA	124	148	NA	319	327	NA	NA	NA	NA	206	242	NA	140	144	NA	200	208	NA	103	115	NA	193	197	NA	363	365	NA	344	372	NA	360	360	NA	191	201	NA	173	175	NA	220	222	NA	154	156	NA
2023-PLATE-104_2023-435_7-Pressure_6500PSI_R1_010	6500 PSI	275	283	NA	124	148	NA	339	343	NA	224	244	NA	234	246	NA	140	140	NA	196	224	NA	115	115	NA	187	193	NA	359	359	NA	336	344	NA	NA	NA	NA	NA	NA	NA	173	175	NA	220	222	NA	156	156	NA
2023-PLATE-104_2023-435_70-Pressure_6500PSI_R1_093	6500 PSI	267	279	NA	124	164	NA	343	343	NA	224	249	NA	234	242	NA	140	140	NA	200	208	NA	115	115	NA	195	197	NA	359	359	NA	372	372	NA	346	360	NA	197	201	NA	173	173	NA	222	226	NA	154	168	NA
2023-PLATE-104_2023-435_71-Pressure_6500PSI_R1_094	6500 PSI	267	279	NA	124	148	NA	343	343	NA	224	244	NA	222	234	NA	140	144	NA	200	208	NA	103	115	NA	195	197	NA	359	365	NA	372	372	NA	346	360	NA	191	201	NA	173	173	NA	220	222	NA	168	168	NA
2023-PLATE-104_2023-435_72-Pressure_6500PSI_R1_096	6500 PSI	267	275	NA	152	164	NA	327	343	NA	NA	NA	NA	234	238	NA	140	140	NA	188	196	NA	103	115	NA	187	193	NA	359	363	NA	336	372	NA	346	352	NA	197	201	NA	173	175	NA	220	222	NA	154	156	NA
2023-PLATE-104_2023-435_73-Pressure_6500PSI_R1_098	6500 PSI	267	275	NA	124	164	NA	343	343	NA	NA	NA	NA	234	238	NA	140	144	NA	188	208	NA	115	115	NA	187	197	NA	359	365	NA	372	372	NA	352	360	NA	191	197	NA	173	175	NA	222	222	NA	154	168	NA
2023-PLATE-104_2023-435_74-Pressure_6500PSI_R1_099	6500 PSI	267	275	NA	124	164	NA	319	327	NA	NA	NA	NA	206	242	NA	140	140	NA	188	196	NA	115	115	NA	187	193	NA	359	363	NA	336	344	NA	346	352	NA	197	201	NA	175	175	NA	220	222	NA	154	156	NA
2023-PLATE-104_2023-435_75-Pressure_6500PSI_R1_100	6500 PSI	267	279	NA	152	164	NA	319	319	343	224	244	NA	222	242	NA	140	140	NA	196	200	NA	103	115	NA	195	197	NA	359	359	NA	372	372	NA	346	346	NA	197	201	NA	173	173	NA	222	226	NA	156	168	NA
2023-PLATE-104_2023-435_76-Pressure_6500PSI_R1_101	6500 PSI	267	275	NA	124	148	NA	343	343	NA	NA	NA	NA	234	238	NA	140	144	NA	188	208	NA	115	115	NA	187	187	NA	359	363	NA	336	372	NA	360	360	NA	191	197	NA	175	175	NA	220	222	NA	154	156	NA
2023-PLATE-104_2023-435_77-Pressure_6500PSI_R1_102	6500 PSI	267	275	NA	124	164	NA	315	343	NA	NA	NA	NA	234	246	NA	140	140	NA	208	224	NA	103	115	NA	187	195	NA	359	365	NA	336	352	NA	346	346	NA	197	197	NA	173	173	NA	220	222	NA	156	156	NA
2023-PLATE-104_2023-435_78-Pressure_6500PSI_R1_104	6500 PSI	275	283	NA	152	164	NA	319	343	NA	224	244	NA	222	242	NA	140	140	NA	196	200	NA	103	115	NA	187	195	NA	359	365	NA	336	372	NA	346	360	NA	191	197	NA	173	173	NA	220	222	NA	156	168	NA
2023-PLATE-104_2023-435_79-Pressure_6500PSI_R1_105	6500 PSI	279	283	NA	152	164	NA	319	343	NA	NA	NA	NA	234	242	NA	140	144	NA	200	208	NA	103	115	NA	187	197	NA	359	365	NA	336	364	NA	346	346	NA	191	191	NA	173	173	NA	220	222	NA	154	168	NA
2023-PLATE-104_2023-435_8-Pressure_6500PSI_R1_011	6500 PSI	267	275	NA	124	148	NA	343	343	NA	224	244	NA	234	242	NA	140	144	NA	200	208	NA	103	115	NA	195	197	NA	359	365	NA	372	372	NA	346	346	NA	191	201	NA	173	173	NA	220	222	NA	156	168	NA
2023-PLATE-104_2023-435_80-Pressure_6500PSI_R1_107	6500 PSI	275	283	NA	148	152	NA	319	327	NA	224	224	NA	234	238	NA	140	140	NA	200	208	NA	NA	NA	NA	193	197	NA	363	365	NA	344	372	NA	346	360	NA	197	197	NA	173	175	NA	222	222	NA	154	156	NA
2023-PLATE-104_2023-435_81-Pressure_6500PSI_R1_108	6500 PSI	267	275	NA	124	164	NA	319	343	NA	224	224	NA	206	234	NA	140	140	NA	188	208	NA	103	115	NA	187	193	NA	363	365	NA	336	344	NA	346	352	NA	197	197	NA	175	175	NA	220	222	NA	154	156	NA
2023-PLATE-104_2023-435_82-Pressure_6500PSI_R1_109	6500 PSI	267	279	NA	152	164	NA	319	343	NA	224	249	NA	222	234	NA	140	144	NA	200	208	NA	115	115	NA	197	197	NA	363	365	NA	364	372	NA	346	360	NA	191	201	NA	173	175	NA	220	222	NA	154	156	168
2023-PLATE-104_2023-435_83-Pressure_6500PSI_R1_110	6500 PSI	275	275	283	124	148	148	315	339	343	NA	NA	NA	234	238	246	140	140	NA	192	196	224	115	115	NA	187	195	195	359	359	NA	336	344	352	346	352	360	197	197	201	173	173	NA	220	220	222	156	156	168
2023-PLATE-104_2023-435_84-Pressure_6500PSI_R1_111	6500 PSI	279	283	NA	148	152	NA	319	343	NA	224	249	NA	222	242	NA	140	140	NA	196	200	NA	115	115	NA	195	197	NA	359	365	NA	372	372	NA	346	360	NA	197	201	NA	173	175	NA	222	226	NA	154	168	NA
2023-PLATE-104_2023-435_85-Pressure_6500PSI_R1_112	6500 PSI	279	283	NA	148	152	NA	319	343	NA	NA	NA	NA	234	234	NA	140	140	NA	196	200	NA	103	115	NA	187	197	NA	359	363	NA	336	364	NA	346	360	NA	191	197	NA	173	175	NA	222	226	NA	156	168	NA
2023-PLATE-104_2023-435_86-Pressure_6500PSI_R1_115	6500 PSI	267	275	NA	152	164	NA	319	343	NA	224	244	NA	222	234	NA	140	140	NA	200	208	NA	103	115	NA	195	197	NA	359	359	NA	372	372	NA	346	360	NA	191	197	NA	173	173	NA	222	226	NA	168	168	NA
2023-PLATE-104_2023-435_87-Pressure_6500PSI_R1_117	6500 PSI	267	275	NA	152	164	NA	319	327	NA	NA	NA	NA	206	234	NA	140	144	NA	196	200	NA	103	115	NA	187	197	NA	365	365	NA	372	372	NA	346	352	NA	191	201	NA	175	175	NA	220	222	NA	154	156	NA
2023-PLATE-104_2023-435_88-Pressure_6500PSI_R1_119	6500 PSI	279	283	NA	152	164	NA	343	343	NA	224	249	NA	222	234	NA	140	140	NA	196	200	NA	103	115	NA	195	197	NA	359	359	NA	372	372	NA	346	360	NA	197	201	NA	173	175	NA	222	222	226	156	168	NA
2023-PLATE-104_2023-435_89-Pressure_6500PSI_R1_121	6500 PSI	267	275	NA	124	164	NA	343	343	NA	224	244	NA	222	242	NA	140	140	NA	196	200	NA	103	115	NA	187	195	NA	359	365	NA	336	372	NA	346	360	NA	197	201	NA	173	173	NA	222	226	NA	154	156	NA
2023-PLATE-104_2023-435_9-Pressure_6500PSI_R1_014	6500 PSI	275	283	NA	124	164	NA	343	343	NA	224	224	NA	234	238	NA	140	140	NA	188	208	NA	103	115	NA	187	193	NA	NA	NA	NA	336	344	NA	360	360	NA	197	201	NA	173	175	NA	222	222	NA	154	156	NA
2023-PLATE-104_2023-435_90-Pressure_6500PSI_R1_122	6500 PSI	275	283	NA	152	164	NA	343	343	NA	NA	NA	NA	238	242	NA	140	140	NA	200	208	NA	103	103	NA	193	197	NA	363	365	NA	344	372	NA	360	360	NA	197	197	NA	175	175	NA	222	222	NA	154	156	NA
2023-PLATE-104_2023-435_91-Pressure_6500PSI_R1_124	6500 PSI	267	275	NA	148	152	NA	319	327	NA	NA	NA	NA	206	242	NA	140	144	NA	200	208	NA	103	115	NA	187	193	NA	363	365	NA	336	372	NA	360	360	NA	191	201	NA	173	173	NA	222	222	NA	154	168	NA
2023-PLATE-104_2023-435_92-Pressure_6500PSI_R1_126	6500 PSI	267	275	NA	152	164	NA	327	343	NA	224	224	NA	238	242	NA	140	140	NA	188	196	NA	103	103	NA	187	187	NA	359	363	NA	336	372	NA	346	352	NA	197	197	NA	173	173	NA	220	222	NA	154	156	NA
2023-PLATE-104_2023-435_93-Pressure_6500PSI_R1_127	6500 PSI	275	275	283	124	148	164	315	339	343	224	244	244	238	242	246	140	140	NA	192	208	224	115	115	NA	193	195	197	359	359	NA	344	352	372	346	352	360	197	197	201	173	173	175	220	220	222	156	156	168
2023-PLATE-105_2023-435_100-Pressure_6500PSI_R1_140	6500 PSI	267	275	NA	148	152	NA	339	343	NA	NA	NA	NA	NA	NA	NA	NA	NA	NA	192	208	NA	103	115	NA	195	197	NA	359	359	NA	344	372	NA	352	360	NA	191	201	NA	173	173	NA	220	222	NA	156	168	NA
2023-PLATE-105_2023-435_101-Pressure_6500PSI_R1_141	6500 PSI	275	275	283	124	148	164	315	319	339	224	244	244	238	242	246	140	140	NA	192	208	224	103	115	115	193	195	197	359	359	365	344	352	372	346	352	360	197	201	201	173	173	175	220	220	222	156	156	NA
2023-PLATE-105_2023-435_102-Pressure_6500PSI_R1_142	6500 PSI	267	275	NA	152	164	NA	319	343	NA	224	224	NA	206	234	NA	140	144	NA	200	208	NA	NA	NA	NA	187	193	NA	359	363	NA	336	344	NA	352	360	NA	191	201	NA	173	175	NA	220	222	NA	154	156	NA
2023-PLATE-105_2023-435_103-Pressure_6500PSI_R1_144	6500 PSI	279	283	NA	124	164	NA	319	343	NA	224	249	NA	234	242	NA	140	140	NA	196	200	NA	115	115	NA	187	195	NA	359	365	NA	336	364	NA	346	360	NA	191	197	NA	173	175	NA	220	222	NA	168	168	NA
2023-PLATE-105_2023-435_104-Pressure_6500PSI_R1_145	6500 PSI	267	275	NA	148	152	NA	343	343	NA	224	249	NA	234	242	NA	140	144	NA	200	208	NA	115	115	NA	195	197	NA	359	365	NA	372	372	NA	346	360	NA	191	191	NA	173	175	NA	222	226	NA	156	168	NA
2023-PLATE-105_2023-435_105-Pressure_6500PSI_R1_146	6500 PSI	275	283	NA	124	164	NA	319	343	NA	224	244	NA	222	242	NA	140	140	NA	196	200	NA	115	115	NA	187	195	NA	359	359	NA	336	372	NA	346	360	NA	197	201	NA	173	175	NA	220	222	NA	154	168	NA
2023-PLATE-105_2023-435_106-Pressure_6500PSI_R1_148	6500 PSI	275	283	NA	148	152	NA	343	343	NA	224	244	NA	234	242	NA	140	140	NA	196	200	200	103	115	NA	195	197	NA	359	365	NA	372	372	NA	346	346	NA	191	197	NA	173	175	NA	222	226	NA	156	168	NA
2023-PLATE-105_2023-435_107-Pressure_6500PSI_R1_149	6500 PSI	275	275	283	124	148	164	315	339	343	224	244	244	234	238	238	140	140	144	192	208	224	103	115	115	193	195	197	359	359	365	344	352	372	346	346	352	191	197	201	173	173	NA	220	220	222	156	156	NA
2023-PLATE-105_2023-435_108-Pressure_6500PSI_R2_003	6500 PSI	267	279	NA	152	164	NA	319	343	NA	NA	NA	NA	234	242	NA	140	140	NA	196	200	NA	115	115	NA	187	195	NA	359	359	NA	336	364	NA	346	360	NA	191	197	NA	173	175	NA	220	222	NA	156	168	NA
2023-PLATE-105_2023-435_109-Pressure_6500PSI_R2_005	6500 PSI	275	283	NA	152	164	NA	343	343	NA	224	244	NA	222	234	NA	140	144	NA	196	200	NA	115	115	NA	187	195	NA	359	359	NA	336	372	NA	346	346	NA	191	191	NA	173	173	NA	222	226	NA	154	156	NA
2023-PLATE-105_2023-435_110-Pressure_6500PSI_R2_006	6500 PSI	267	275	NA	152	164	NA	319	343	NA	224	249	NA	222	234	NA	140	144	NA	196	200	NA	115	115	NA	197	197	NA	359	363	NA	372	372	NA	346	360	NA	191	191	NA	173	173	NA	220	222	NA	156	168	NA
2023-PLATE-105_2023-435_111-Pressure_6500PSI_R2_008	6500 PSI	267	279	NA	148	152	NA	319	343	NA	224	249	NA	222	242	NA	140	144	NA	196	200	NA	103	115	NA	197	197	NA	359	363	NA	372	372	NA	346	360	NA	191	191	NA	173	175	NA	222	226	NA	156	168	NA
2023-PLATE-105_2023-435_112-Pressure_6500PSI_R2_009	6500 PSI	279	283	NA	152	164	NA	343	343	NA	224	249	NA	234	242	NA	140	144	NA	196	200	NA	115	115	NA	187	195	NA	359	359	NA	336	372	NA	346	346	NA	191	201	NA	173	175	NA	222	226	NA	154	156	NA
2023-PLATE-105_2023-435_113-Pressure_6500PSI_R2_010	6500 PSI	275	283	NA	124	164	NA	343	343	NA	224	249	NA	222	242	NA	140	144	NA	196	200	NA	103	115	NA	187	197	NA	359	363	NA	336	364	NA	346	360	NA	191	201	NA	173	175	NA	220	222	NA	154	156	NA
2023-PLATE-105_2023-435_114-Pressure_6500PSI_R2_012	6500 PSI	267	279	NA	124	148	NA	343	343	NA	224	244	NA	222	242	NA	140	140	NA	200	208	NA	115	115	NA	197	197	NA	363	365	NA	372	372	NA	346	360	NA	191	197	NA	173	175	NA	220	222	NA	156	168	NA
2023-PLATE-105_2023-435_115-Pressure_6500PSI_R2_014	6500 PSI	267	275	NA	148	152	NA	327	343	NA	NA	NA	NA	206	242	NA	140	140	NA	188	196	NA	103	103	NA	187	197	NA	359	365	NA	372	372	NA	346	360	NA	197	201	NA	173	175	NA	222	222	NA	154	156	NA
2023-PLATE-105_2023-435_116-Pressure_6500PSI_R2_015	6500 PSI	279	283	NA	152	164	NA	319	343	NA	224	249	NA	222	242	NA	140	140	NA	200	208	NA	103	115	NA	195	197	NA	359	365	NA	372	372	NA	346	346	NA	197	201	NA	173	173	NA	222	226	NA	168	168	NA
2023-PLATE-105_2023-435_117-Pressure_6500PSI_R2_016	6500 PSI	275	275	283	124	148	164	315	339	343	224	244	244	234	238	246	140	140	NA	192	208	224	103	115	115	187	193	195	359	359	NA	336	344	352	346	352	360	197	197	201	173	173	NA	220	220	222	156	156	168
2023-PLATE-105_2023-435_118-Pressure_6500PSI_R2_017	6500 PSI	275	275	283	124	148	164	315	339	343	224	244	244	234	238	246	140	140	NA	192	196	224	115	115	NA	193	193	197	359	359	365	344	352	372	346	346	360	197	197	201	173	173	175	220	220	222	156	156	168
2023-PLATE-105_2023-435_119-Pressure_6500PSI_R2_018	6500 PSI	267	275	NA	124	148	NA	343	343	NA	NA	NA	NA	238	242	NA	140	140	NA	196	200	NA	103	115	NA	193	197	NA	363	365	NA	372	372	NA	346	360	NA	197	201	NA	173	173	NA	220	222	NA	154	168	NA
2023-PLATE-105_2023-435_120-Pressure_6500PSI_R2_020	6500 PSI	275	283	NA	148	152	NA	319	339	NA	224	244	NA	234	246	NA	140	140	NA	196	224	NA	115	115	NA	195	197	NA	359	365	NA	352	372	NA	346	352	NA	197	201	NA	173	173	NA	220	222	NA	156	168	NA
2023-PLATE-105_2023-435_121-Pressure_6500PSI_R2_021	6500 PSI	267	279	NA	148	152	NA	319	343	NA	224	249	NA	222	242	NA	140	144	NA	200	208	NA	115	115	NA	197	197	NA	363	365	NA	364	372	NA	346	360	NA	191	191	NA	173	175	NA	220	222	NA	154	156	NA
2023-PLATE-105_2023-435_122-Pressure_6500PSI_R2_023	6500 PSI	267	275	NA	152	164	NA	343	343	NA	224	249	NA	222	234	NA	140	140	NA	200	208	NA	115	115	NA	187	195	NA	359	365	NA	336	364	NA	346	346	NA	191	197	NA	173	175	NA	220	222	NA	156	168	NA
2023-PLATE-105_2023-435_123-Pressure_6500PSI_R2_025	6500 PSI	267	275	NA	152	164	NA	319	343	NA	224	249	NA	222	242	NA	140	140	NA	200	208	NA	103	115	NA	187	197	NA	363	365	NA	336	372	NA	346	360	NA	197	201	NA	173	175	NA	222	226	NA	154	168	NA
2023-PLATE-105_2023-435_124-Pressure_6500PSI_R2_027	6500 PSI	267	275	NA	124	164	NA	319	327	NA	224	224	NA	238	242	NA	140	144	NA	200	208	NA	115	115	NA	187	193	NA	359	363	NA	336	344	NA	346	352	NA	191	197	NA	173	175	NA	220	222	NA	154	156	NA
2023-PLATE-105_2023-435_125-Pressure_6500PSI_R2_028	6500 PSI	275	283	NA	124	148	NA	339	343	NA	224	244	NA	234	246	NA	140	144	NA	192	196	NA	103	115	NA	193	197	NA	359	359	NA	344	372	NA	346	346	NA	191	197	NA	173	175	NA	220	222	NA	156	168	NA
2023-PLATE-105_2023-435_126-Pressure_6500PSI_R2_029	6500 PSI	267	275	NA	124	164	NA	319	343	NA	224	244	NA	222	234	NA	140	140	NA	200	208	NA	115	115	NA	195	197	NA	359	363	NA	372	372	NA	346	346	NA	191	197	NA	173	173	NA	222	226	NA	168	168	NA
2023-PLATE-105_2023-435_127-Pressure_6500PSI_R2_030	6500 PSI	275	275	283	148	152	164	315	339	343	224	244	244	234	238	246	140	140	NA	196	224	224	115	115	NA	195	195	197	359	359	365	344	352	372	346	352	360	197	197	201	173	173	NA	220	220	222	156	156	168
2023-PLATE-105_2023-435_128-Pressure_6500PSI_R2_031	6500 PSI	267	275	275	148	152	164	315	319	339	224	244	244	238	242	246	140	140	NA	192	196	224	115	115	NA	193	193	197	359	359	365	344	352	372	346	346	352	197	197	201	173	173	NA	220	220	222	156	156	168
2023-PLATE-105_2023-435_129-Pressure_6500PSI_R2_032	6500 PSI	275	275	283	148	152	164	315	339	343	224	244	244	238	242	246	140	140	144	192	208	224	115	115	NA	193	193	197	359	359	365	344	352	372	346	346	352	191	197	201	173	173	175	220	220	222	156	156	168
2023-PLATE-105_2023-435_130-Pressure_6500PSI_R2_033	6500 PSI	275	283	NA	152	164	NA	339	343	NA	224	244	NA	234	238	246	140	140	NA	192	200	NA	115	115	NA	195	197	NA	359	365	NA	352	372	NA	346	346	NA	197	201	NA	173	175	NA	220	222	NA	156	168	NA
2023-PLATE-105_2023-435_131-Pressure_6500PSI_R2_034	6500 PSI	267	275	NA	148	152	NA	319	343	NA	224	249	NA	234	234	NA	140	140	NA	200	208	NA	103	115	NA	195	197	NA	359	365	NA	372	372	NA	346	360	NA	197	201	NA	173	175	NA	220	222	NA	154	156	NA
2023-PLATE-105_2023-435_132-Pressure_6500PSI_R2_035	6500 PSI	275	283	NA	124	148	NA	343	343	NA	224	249	NA	222	242	NA	140	140	NA	196	200	NA	103	115	NA	197	197	NA	363	365	NA	364	372	NA	346	346	NA	191	197	NA	173	173	NA	222	226	NA	154	156	NA
2023-PLATE-105_2023-435_133-Pressure_6500PSI_R2_036	6500 PSI	267	275	NA	124	164	NA	319	343	NA	224	249	NA	234	242	NA	140	144	NA	196	200	NA	103	115	NA	187	195	NA	359	359	NA	336	372	NA	346	346	NA	191	201	NA	173	175	NA	222	226	NA	154	156	NA
2023-PLATE-105_2023-435_134-Pressure_6500PSI_R2_037	6500 PSI	267	275	NA	148	152	NA	343	343	NA	224	244	NA	222	242	NA	140	144	NA	200	208	NA	103	115	NA	197	197	NA	363	365	NA	364	372	NA	346	360	NA	191	191	NA	173	173	NA	222	226	NA	154	168	NA
2023-PLATE-105_2023-435_135-Pressure_6500PSI_R2_038	6500 PSI	275	283	NA	148	152	NA	319	327	NA	NA	NA	NA	234	238	NA	140	140	NA	196	200	NA	103	115	NA	187	197	NA	359	363	NA	372	372	NA	352	360	NA	197	201	NA	173	175	NA	222	222	NA	154	156	NA
2023-PLATE-105_2023-435_136-Pressure_6500PSI_R2_040	6500 PSI	279	283	NA	124	164	NA	343	343	NA	224	244	NA	222	242	NA	140	140	NA	200	208	NA	115	115	NA	197	197	NA	363	365	NA	364	372	NA	346	346	NA	191	197	NA	173	173	NA	222	226	NA	154	156	NA
2023-PLATE-105_2023-435_137-Pressure_6500PSI_R2_043	6500 PSI	267	275	NA	124	164	NA	343	343	NA	224	224	NA	238	242	NA	140	144	NA	196	200	NA	103	103	NA	187	193	NA	359	363	NA	336	344	NA	346	360	NA	191	201	NA	173	175	NA	222	222	NA	154	156	NA
2023-PLATE-105_2023-435_138-Pressure_6500PSI_R2_044	6500 PSI	267	275	NA	148	152	NA	315	319	NA	224	244	NA	242	246	NA	140	144	NA	208	224	NA	103	115	NA	187	193	NA	359	359	NA	336	344	NA	346	352	NA	191	201	NA	173	175	NA	220	222	NA	156	168	NA
2023-PLATE-105_2023-435_139-Pressure_6500PSI_R2_045	6500 PSI	279	283	NA	124	164	NA	343	343	NA	224	249	NA	222	234	NA	140	140	NA	200	208	NA	115	115	NA	187	195	NA	359	359	NA	336	372	NA	346	360	NA	197	201	NA	173	175	NA	222	226	NA	154	156	NA
2023-PLATE-105_2023-435_140-Pressure_6500PSI_R2_046	6500 PSI	275	283	NA	148	152	NA	319	339	NA	224	244	NA	234	238	NA	140	140	NA	192	208	NA	115	115	NA	195	197	NA	359	365	NA	352	372	NA	352	360	NA	197	197	NA	173	173	NA	220	222	NA	156	168	NA
2023-PLATE-105_2023-435_141-Pressure_6500PSI_R2_047	6500 PSI	267	275	NA	124	148	NA	319	339	NA	224	244	NA	234	238	NA	140	144	NA	196	224	NA	115	115	NA	187	195	NA	359	365	NA	336	352	NA	346	360	NA	191	201	NA	173	173	NA	220	222	NA	156	156	NA
2023-PLATE-105_2023-435_142-Pressure_6500PSI_R2_048	6500 PSI	279	283	NA	124	164	NA	319	343	NA	224	249	NA	234	242	NA	140	140	NA	200	208	NA	103	115	NA	187	195	NA	359	359	NA	336	372	NA	346	346	NA	197	201	NA	173	173	NA	220	222	NA	168	168	NA
2023-PLATE-105_2023-435_143-Pressure_6500PSI_R2_049	6500 PSI	275	283	NA	124	148	NA	327	343	NA	NA	NA	NA	206	234	NA	140	144	NA	188	196	NA	103	103	NA	187	187	NA	359	363	NA	336	372	NA	346	352	NA	191	197	NA	173	175	NA	222	222	NA	154	168	NA
2023-PLATE-105_2023-435_144-Pressure_6500PSI_R2_050	6500 PSI	267	275	NA	148	152	NA	343	343	NA	224	249	NA	234	242	NA	140	144	NA	196	200	NA	115	115	NA	187	197	NA	363	365	NA	336	364	NA	346	346	NA	191	201	NA	173	175	NA	222	226	NA	154	156	NA
2023-PLATE-105_2023-435_145-Pressure_6500PSI_R2_051	6500 PSI	275	283	NA	152	164	NA	343	343	NA	224	224	NA	206	242	NA	140	140	NA	196	200	NA	103	103	NA	187	197	NA	359	365	NA	372	372	NA	352	360	NA	197	201	NA	175	175	NA	220	222	NA	154	168	NA
2023-PLATE-105_2023-435_146-Pressure_6500PSI_R2_052	6500 PSI	267	279	NA	124	148	NA	343	343	NA	224	249	NA	222	242	NA	140	144	NA	196	200	NA	115	115	NA	195	197	NA	359	365	NA	364	372	NA	346	360	NA	191	201	NA	173	175	NA	220	222	NA	168	168	NA
2023-PLATE-105_2023-435_147-Pressure_6500PSI_R2_053	6500 PSI	267	275	NA	124	164	NA	339	343	343	NA	NA	NA	NA	NA	NA	140	144	NA	192	208	NA	103	115	NA	195	197	NA	359	365	NA	NA	NA	NA	346	346	NA	191	201	NA	NA	NA	NA	220	222	NA	156	168	168
2023-PLATE-105_2023-435_148-Pressure_6500PSI_R2_055	6500 PSI	279	283	NA	152	164	NA	343	343	NA	224	244	NA	222	242	NA	140	140	NA	200	208	NA	115	115	NA	187	197	NA	359	363	NA	336	364	NA	346	360	NA	197	201	NA	173	173	NA	220	222	NA	168	168	NA
2023-PLATE-105_2023-435_149-Pressure_6500PSI_R2_056	6500 PSI	267	279	NA	124	148	NA	319	343	NA	224	244	NA	234	234	NA	140	140	NA	196	200	NA	103	115	NA	197	197	NA	363	365	NA	372	372	NA	346	360	NA	197	201	NA	173	173	NA	220	222	NA	168	168	NA
2023-PLATE-105_2023-435_150-Pressure_6500PSI_R2_057	6500 PSI	279	283	NA	124	148	NA	319	343	NA	224	244	NA	222	234	NA	140	140	NA	196	200	NA	103	115	NA	187	197	NA	363	365	NA	336	364	NA	346	346	NA	197	201	NA	173	175	NA	220	222	NA	154	156	NA
2023-PLATE-105_2023-435_151-Pressure_6500PSI_R2_059	6500 PSI	279	283	NA	152	164	NA	343	343	NA	224	249	NA	222	234	NA	140	140	NA	200	208	NA	103	115	NA	187	197	NA	359	359	NA	336	364	NA	346	360	NA	191	197	NA	173	175	NA	222	226	NA	154	168	NA
2023-PLATE-105_2023-435_152-Pressure_6500PSI_R2_061	6500 PSI	279	283	NA	148	152	NA	319	327	NA	224	224	NA	206	234	NA	140	144	NA	200	208	NA	103	115	NA	187	193	NA	359	363	NA	336	372	NA	352	360	NA	191	201	NA	173	173	NA	220	222	NA	154	156	NA
2023-PLATE-105_2023-435_153-Pressure_6500PSI_R2_062	6500 PSI	279	283	NA	124	164	NA	343	343	NA	224	244	NA	222	242	NA	140	140	NA	200	208	NA	103	115	NA	187	195	NA	359	365	NA	336	372	NA	346	360	NA	191	197	NA	173	173	NA	220	222	NA	154	156	NA
2023-PLATE-105_2023-435_154-Pressure_6500PSI_R2_063	6500 PSI	275	283	NA	124	164	NA	319	343	NA	224	224	NA	238	242	NA	140	144	NA	200	208	NA	103	115	NA	187	193	NA	359	365	NA	336	344	NA	346	352	NA	191	201	NA	175	175	NA	220	222	NA	154	156	NA
2023-PLATE-105_2023-435_155-Pressure_6500PSI_R2_064	6500 PSI	279	283	NA	124	148	NA	319	343	NA	224	244	NA	222	242	NA	140	140	NA	200	208	NA	115	115	NA	187	197	NA	359	363	NA	336	364	NA	346	360	NA	191	197	NA	173	175	NA	220	222	NA	154	168	NA
2023-PLATE-105_2023-435_156-Pressure_6500PSI_R2_066	6500 PSI	267	275	NA	152	164	NA	319	343	NA	224	249	NA	234	242	NA	140	140	NA	200	208	NA	115	115	NA	NA	NA	NA	359	365	NA	336	364	NA	346	360	NA	197	201	NA	173	173	NA	NA	NA	NA	156	168	NA
2023-PLATE-105_2023-435_157-Pressure_6500PSI_R2_068	6500 PSI	NA	NA	NA	NA	NA	NA	NA	NA	NA	NA	NA	NA	NA	NA	NA	NA	NA	NA	NA	NA	NA	NA	NA	NA	NA	NA	NA	NA	NA	NA	NA	NA	NA	NA	NA	NA	NA	NA	NA	NA	NA	NA	NA	NA	NA	NA	NA	NA
2023-PLATE-105_2023-435_158-Pressure_6500PSI_R2_069	6500 PSI	275	283	NA	124	148	NA	319	343	NA	224	249	NA	222	242	NA	140	140	NA	200	208	NA	103	115	NA	187	195	NA	359	359	NA	336	372	NA	346	360	NA	197	201	NA	173	175	NA	222	226	NA	154	156	NA
2023-PLATE-105_2023-435_159-Pressure_6500PSI_R2_070	6500 PSI	NA	NA	NA	124	164	NA	NA	NA	NA	224	224	249	222	234	NA	140	144	NA	196	200	NA	103	115	115	187	195	NA	359	359	NA	NA	NA	NA	346	346	NA	191	201	NA	NA	NA	NA	222	222	226	NA	NA	NA
2023-PLATE-105_2023-435_160-Pressure_6500PSI_R2_071	6500 PSI	275	283	NA	124	164	NA	327	343	NA	NA	NA	NA	206	234	NA	140	140	NA	200	208	NA	115	115	NA	187	187	NA	363	365	NA	336	372	NA	352	360	NA	197	197	NA	173	175	NA	220	222	NA	154	156	NA
2023-PLATE-105_2023-435_161-Pressure_6500PSI_R2_072	6500 PSI	275	283	NA	124	164	NA	319	339	NA	224	244	NA	234	246	NA	140	144	NA	196	224	NA	115	115	NA	187	193	NA	359	365	NA	336	344	NA	346	346	NA	191	197	NA	173	173	NA	220	222	NA	156	156	NA
2023-PLATE-105_2023-435_162-Pressure_6500PSI_R2_074	6500 PSI	275	283	NA	NA	NA	NA	343	343	NA	224	224	NA	234	238	NA	140	144	NA	196	200	NA	103	115	NA	187	193	NA	359	363	NA	336	344	NA	352	360	NA	191	201	NA	173	175	NA	222	222	NA	154	168	NA
2023-PLATE-105_2023-435_163-Pressure_6500PSI_R2_075	6500 PSI	275	275	283	124	164	NA	343	343	NA	NA	NA	NA	234	238	NA	140	144	NA	188	208	NA	115	115	NA	193	197	NA	363	365	NA	372	372	NA	346	360	NA	191	197	NA	173	173	NA	220	222	NA	154	168	NA
2023-PLATE-105_2023-435_164-Pressure_6500PSI_R2_078	6500 PSI	267	279	NA	124	148	NA	319	343	NA	224	249	NA	234	234	NA	140	144	NA	196	200	NA	103	115	NA	195	197	NA	359	365	NA	372	372	NA	346	360	NA	191	201	NA	173	175	NA	220	222	NA	154	168	NA
2023-PLATE-105_2023-435_165-Pressure_6500PSI_R2_079	6500 PSI	275	283	NA	124	148	NA	319	343	NA	224	244	NA	222	242	NA	140	144	NA	200	208	NA	103	115	NA	187	197	NA	363	365	NA	336	364	NA	346	346	NA	191	191	NA	173	173	NA	220	222	NA	168	168	NA
2023-PLATE-105_2023-435_166-Pressure_6500PSI_R2_080	6500 PSI	275	275	283	124	148	164	315	319	339	224	244	244	242	246	246	140	140	NA	192	208	224	103	115	115	193	195	197	359	359	NA	344	352	372	346	346	352	197	197	201	173	173	175	220	220	222	156	156	168
2023-PLATE-105_2023-435_167-Pressure_6500PSI_R2_081	6500 PSI	267	275	NA	152	164	NA	319	343	NA	224	249	NA	222	242	NA	140	140	NA	200	208	NA	103	115	NA	197	197	NA	363	365	NA	364	372	NA	346	346	NA	197	201	NA	173	173	NA	220	222	NA	168	168	NA
2023-PLATE-105_2023-435_168-Pressure_6500PSI_R2_082	6500 PSI	267	275	NA	124	164	NA	343	343	NA	224	253	NA	222	234	NA	140	140	NA	196	200	NA	103	115	NA	187	197	NA	359	363	NA	336	372	NA	346	346	NA	197	201	NA	173	173	NA	222	226	NA	154	168	NA
2023-PLATE-105_2023-435_169-Pressure_6500PSI_R2_083	6500 PSI	275	283	NA	148	152	NA	319	343	NA	224	244	NA	222	242	NA	140	140	NA	200	208	NA	103	115	NA	187	195	NA	359	359	NA	336	372	NA	346	346	NA	197	201	NA	173	175	NA	220	222	NA	168	168	NA
2023-PLATE-105_2023-435_170-Pressure_6500PSI_R2_085	6500 PSI	267	275	NA	152	164	NA	319	343	NA	224	244	NA	234	234	NA	140	140	NA	196	200	NA	103	115	NA	197	197	NA	363	365	NA	364	372	NA	346	360	NA	191	197	NA	173	175	NA	222	226	NA	154	156	NA
2023-PLATE-105_2023-435_171-Pressure_6500PSI_R2_086	6500 PSI	267	275	275	124	148	164	339	339	343	224	244	244	238	242	246	140	140	NA	192	196	224	103	115	115	187	193	195	359	359	NA	336	344	352	346	346	352	197	197	201	173	173	NA	220	220	222	156	156	168
2023-PLATE-105_2023-435_172-Pressure_6500PSI_R2_087	6500 PSI	267	275	275	148	152	164	315	339	343	224	244	244	234	238	246	140	140	NA	192	196	224	115	115	NA	187	193	195	359	359	NA	332	344	352	346	352	360	197	197	NA	173	173	NA	220	220	222	156	156	168
2023-PLATE-105_2023-435_173-Pressure_6500PSI_R2_088	6500 PSI	275	283	NA	124	148	NA	343	343	NA	224	249	NA	222	234	NA	140	144	NA	196	200	NA	115	115	NA	197	197	NA	363	365	NA	364	372	NA	346	360	NA	191	191	NA	173	175	NA	222	226	NA	156	168	NA
2023-PLATE-105_2023-435_174-Pressure_6500PSI_R2_093	6500 PSI	267	275	275	124	148	164	315	339	343	224	244	244	238	242	246	140	140	NA	192	196	224	103	115	115	187	193	193	359	359	NA	336	344	352	346	352	360	197	197	201	173	173	175	220	220	222	156	156	NA
2023-PLATE-105_2023-435_175-Pressure_6500PSI_R2_095	6500 PSI	275	283	NA	124	164	NA	319	343	NA	224	249	NA	222	234	NA	140	140	NA	200	208	NA	103	115	NA	187	197	NA	363	365	NA	336	364	NA	346	360	NA	191	197	NA	173	173	NA	222	226	NA	154	156	NA
2023-PLATE-105_2023-435_176-Pressure_6500PSI_R2_097	6500 PSI	267	275	NA	152	164	NA	343	343	NA	224	249	NA	222	242	NA	140	144	NA	200	208	NA	103	115	NA	197	197	NA	363	365	NA	364	372	NA	346	360	NA	191	191	NA	173	173	NA	222	226	NA	154	156	NA
2023-PLATE-105_2023-435_177-Pressure_6500PSI_R2_098	6500 PSI	NA	NA	NA	NA	NA	NA	NA	NA	NA	NA	NA	NA	NA	NA	NA	NA	NA	NA	NA	NA	NA	NA	NA	NA	NA	NA	NA	NA	NA	NA	NA	NA	NA	NA	NA	NA	NA	NA	NA	NA	NA	NA	NA	NA	NA	NA	NA	NA
2023-PLATE-105_2023-435_178-Pressure_6500PSI_R2_103	6500 PSI	267	275	NA	124	148	NA	319	327	NA	224	224	NA	206	242	NA	140	144	NA	200	208	NA	103	115	NA	187	187	NA	359	363	NA	336	372	NA	360	360	NA	191	201	NA	173	175	NA	220	222	NA	154	168	NA
2023-PLATE-105_2023-435_179-Pressure_6500PSI_R2_106	6500 PSI	275	283	NA	124	148	NA	319	327	NA	224	224	NA	238	242	NA	140	144	NA	196	200	NA	115	115	NA	187	197	NA	365	365	NA	372	372	NA	346	352	NA	191	201	NA	175	175	NA	220	222	NA	154	156	NA
2023-PLATE-105_2023-435_180-Pressure_6500PSI_R2_107	6500 PSI	279	283	NA	148	152	NA	319	343	NA	224	249	NA	222	234	NA	140	144	NA	200	208	NA	103	115	NA	197	197	NA	359	365	NA	364	372	NA	346	346	NA	191	191	NA	173	173	NA	220	222	NA	168	168	NA
2023-PLATE-105_2023-435_181-Pressure_6500PSI_R2_108	6500 PSI	267	275	NA	148	152	NA	327	343	NA	NA	NA	NA	234	238	NA	140	144	NA	200	208	NA	103	115	NA	193	197	NA	363	365	NA	344	372	NA	360	360	NA	191	201	NA	173	173	NA	222	222	NA	154	168	NA
2023-PLATE-105_2023-435_182-Pressure_6500PSI_R2_109	6500 PSI	267	275	NA	124	164	NA	343	343	NA	NA	NA	NA	238	242	NA	140	144	NA	200	200	208	115	115	NA	193	197	NA	363	365	NA	344	372	NA	346	352	NA	191	201	NA	173	173	NA	222	222	NA	154	168	NA
2023-PLATE-105_2023-435_183-Pressure_6500PSI_R2_111	6500 PSI	275	275	283	148	152	164	315	319	339	224	244	244	238	242	246	140	140	144	192	196	224	115	115	NA	187	193	195	359	359	365	336	344	352	346	346	352	191	197	201	173	173	175	220	220	222	156	156	NA
2023-PLATE-105_2023-435_184-Pressure_6500PSI_R2_112	6500 PSI	267	279	NA	124	164	NA	319	343	NA	224	244	NA	222	234	NA	140	144	NA	196	200	NA	103	115	NA	187	195	NA	359	359	NA	336	372	NA	346	346	NA	191	201	NA	173	173	NA	222	226	NA	154	168	NA
2023-PLATE-105_2023-435_185-Pressure_6500PSI_R2_113	6500 PSI	275	283	NA	124	148	NA	319	343	NA	224	224	NA	234	238	NA	140	144	NA	200	208	NA	115	115	NA	187	193	NA	359	363	NA	336	344	NA	360	360	NA	191	197	NA	173	175	NA	222	222	NA	154	156	NA
2023-PLATE-105_2023-435_186-Pressure_6500PSI_R2_114	6500 PSI	267	275	NA	124	148	NA	343	343	NA	NA	NA	NA	206	242	NA	140	144	NA	200	208	NA	103	103	115	187	197	NA	365	365	NA	344	372	NA	346	360	NA	191	201	NA	173	173	NA	220	222	NA	154	156	NA
2023-PLATE-105_2023-435_187-Pressure_6500PSI_R2_119	6500 PSI	275	283	NA	124	164	NA	343	343	NA	224	249	NA	222	234	NA	140	144	NA	200	208	NA	115	115	NA	187	195	NA	359	359	NA	336	372	NA	346	346	NA	191	201	NA	173	175	NA	220	222	NA	154	168	NA
2023-PLATE-105_2023-435_94-Pressure_6500PSI_R1_130	6500 PSI	275	275	283	148	152	164	315	319	339	224	244	244	234	238	238	140	140	NA	192	208	224	103	115	115	193	195	197	359	359	365	344	352	372	346	352	360	197	197	NA	173	173	175	220	220	222	156	156	NA
2023-PLATE-105_2023-435_95-Pressure_6500PSI_R1_131	6500 PSI	275	283	NA	148	152	NA	319	343	NA	224	249	NA	234	242	NA	140	144	NA	196	200	NA	103	115	NA	195	197	NA	359	365	NA	372	372	NA	346	346	NA	191	201	NA	173	173	NA	220	222	NA	154	156	NA
2023-PLATE-105_2023-435_96-Pressure_6500PSI_R1_132	6500 PSI	279	283	NA	124	164	NA	319	343	NA	224	249	NA	234	234	NA	140	140	NA	200	208	NA	103	115	NA	195	197	NA	359	365	NA	364	372	NA	346	360	NA	191	197	NA	173	173	NA	222	226	NA	156	168	NA
2023-PLATE-105_2023-435_97-Pressure_6500PSI_R1_133	6500 PSI	267	279	NA	148	152	NA	343	343	NA	224	249	NA	222	234	NA	140	144	NA	196	200	NA	115	115	NA	187	195	NA	359	365	NA	336	372	NA	346	346	NA	191	201	NA	173	173	NA	222	226	NA	168	168	NA
2023-PLATE-105_2023-435_98-Pressure_6500PSI_R1_134	6500 PSI	275	275	283	124	148	164	315	319	339	224	244	244	238	242	246	140	140	144	192	208	224	103	115	115	193	193	197	359	359	365	344	344	372	346	346	352	191	197	201	173	173	NA	220	220	222	156	156	168
2023-PLATE-105_2023-435_99-Pressure_6500PSI_R1_136	6500 PSI	267	275	275	124	148	164	315	339	343	NA	NA	NA	238	242	246	140	140	144	192	208	224	115	115	NA	187	193	193	359	359	NA	336	344	352	352	352	360	191	197	201	173	173	NA	220	220	222	156	156	168
2023-PLATE-106_2022-2353_1-Pressure_7500PSI_R1_001	7500 PSI	279	279	283	148	152	164	343	343	NA	224	244	249	222	234	242	140	140	NA	196	200	200	115	115	NA	187	195	197	359	359	363	336	364	372	346	346	NA	191	197	201	173	173	175	220	222	226	154	156	168
2023-PLATE-106_2022-2353_10-Pressure_7500PSI_R1_010	7500 PSI	275	283	NA	124	164	NA	343	343	NA	224	244	NA	234	242	NA	140	144	NA	200	208	NA	103	115	NA	195	197	NA	359	365	NA	372	372	NA	346	360	NA	191	201	NA	173	175	NA	222	226	NA	168	168	NA
2023-PLATE-106_2022-2353_11-Pressure_7500PSI_R1_011	7500 PSI	267	275	275	148	152	164	315	319	339	224	244	244	234	238	246	140	140	144	184	196	224	115	115	NA	195	195	197	359	359	NA	344	352	372	346	346	352	191	197	201	173	173	175	220	220	222	156	156	NA
2023-PLATE-106_2022-2353_12-Pressure_7500PSI_R1_012	7500 PSI	275	275	283	148	152	164	315	319	339	224	244	244	238	242	246	140	140	NA	192	196	224	103	115	115	187	193	195	359	359	NA	336	344	352	346	352	360	197	197	201	173	173	NA	220	220	NA	156	156	168
2023-PLATE-106_2022-2353_13-Pressure_7500PSI_R1_013	7500 PSI	275	275	283	148	152	164	315	339	343	224	244	244	234	238	246	140	140	144	192	196	224	115	115	NA	187	193	195	359	359	NA	336	344	352	346	346	352	191	197	201	173	173	NA	220	220	222	156	156	168
2023-PLATE-106_2022-2353_14-Pressure_7500PSI_R1_014	7500 PSI	275	275	283	124	148	164	315	319	339	224	244	244	238	242	246	140	140	NA	192	208	224	103	115	115	193	195	197	359	359	365	344	352	372	346	352	360	197	197	201	173	173	175	220	220	222	156	156	168
2023-PLATE-106_2022-2353_15-Pressure_7500PSI_R1_015	7500 PSI	267	275	275	124	148	164	319	327	327	224	224	NA	206	234	238	140	140	144	188	200	208	103	103	115	187	187	193	359	363	365	336	344	372	346	360	360	191	197	201	173	173	175	220	222	222	154	154	156
2023-PLATE-106_2022-2353_16-Pressure_7500PSI_R1_016	7500 PSI	275	275	283	124	148	164	327	327	343	224	224	NA	206	238	242	140	140	NA	188	200	208	103	115	115	187	187	197	359	365	365	344	372	372	346	352	360	197	197	201	175	175	NA	220	222	222	154	154	168
2023-PLATE-106_2022-2353_17-Pressure_7500PSI_R1_017	7500 PSI	267	275	275	148	148	152	315	319	339	224	244	244	234	238	246	140	140	144	192	196	224	103	115	115	195	195	197	359	359	NA	344	352	372	346	352	360	191	197	201	173	173	NA	220	220	222	156	156	168
2023-PLATE-106_2022-2353_18-Pressure_7500PSI_R1_018	7500 PSI	267	275	275	124	148	164	315	319	339	224	244	244	234	238	246	140	140	144	192	208	224	103	115	115	193	195	197	359	359	365	344	352	372	346	346	352	191	201	201	173	173	NA	220	220	222	156	156	NA
2023-PLATE-106_2022-2353_19-Pressure_7500PSI_R1_019	7500 PSI	267	275	NA	124	148	NA	327	343	NA	224	224	NA	206	234	NA	140	144	NA	188	208	NA	115	115	NA	193	197	NA	365	365	NA	344	372	NA	346	352	NA	191	201	NA	173	175	NA	222	222	NA	154	168	NA
2023-PLATE-106_2022-2353_2-Pressure_7500PSI_R1_002	7500 PSI	275	275	283	124	148	164	315	339	343	224	244	244	234	238	246	140	140	144	192	208	224	103	115	115	187	193	193	359	359	NA	336	344	352	346	346	352	191	197	197	173	173	NA	220	220	222	156	156	NA
2023-PLATE-106_2022-2353_20-Pressure_7500PSI_R1_020	7500 PSI	275	275	283	148	152	164	315	339	343	224	244	244	234	238	246	140	140	144	192	196	224	115	115	NA	193	195	197	359	359	NA	344	352	372	346	346	352	191	197	201	173	173	175	220	220	222	156	156	168
2023-PLATE-106_2022-2353_21-Pressure_7500PSI_R1_021	7500 PSI	275	279	283	124	148	164	343	343	NA	224	244	249	222	234	234	140	140	144	196	200	200	115	115	NA	187	195	197	359	359	363	336	364	372	346	346	NA	191	191	201	173	173	NA	220	222	226	154	156	168
2023-PLATE-106_2022-2353_22-Pressure_7500PSI_R1_022	7500 PSI	267	275	275	148	152	164	315	319	339	224	244	244	238	242	246	140	140	NA	192	196	224	103	115	115	187	193	195	359	359	NA	336	344	352	346	346	352	197	197	201	173	173	175	220	220	222	156	156	NA
2023-PLATE-106_2022-2353_23-Pressure_7500PSI_R1_023	7500 PSI	275	275	283	148	152	164	319	327	343	NA	NA	NA	206	238	242	140	140	NA	188	196	200	103	103	115	187	187	NA	359	365	365	336	344	372	346	352	360	197	197	201	173	173	NA	220	222	222	154	154	168
2023-PLATE-106_2022-2353_24-Pressure_7500PSI_R1_024	7500 PSI	275	275	283	124	148	164	315	339	343	224	244	244	234	238	246	140	140	NA	192	196	224	103	115	115	187	193	195	359	359	NA	336	344	352	346	352	360	197	197	201	173	173	175	220	220	222	156	156	168
2023-PLATE-106_2022-2353_25-Pressure_7500PSI_R1_025	7500 PSI	267	275	275	124	148	164	315	319	339	224	244	244	234	238	246	140	140	NA	192	196	224	115	115	NA	187	193	195	359	359	NA	336	344	352	346	352	360	197	197	201	173	173	NA	220	220	222	156	156	168
2023-PLATE-106_2022-2353_26-Pressure_7500PSI_R1_026	7500 PSI	275	275	283	124	148	164	315	319	339	224	244	244	238	242	246	140	140	144	192	192	208	115	115	NA	195	195	197	359	359	365	344	352	372	346	352	360	191	197	201	173	173	NA	220	220	222	156	156	NA
2023-PLATE-106_2022-2353_27-Pressure_7500PSI_R1_027	7500 PSI	267	275	275	124	148	164	315	319	339	224	244	244	238	242	246	140	140	144	192	196	224	115	115	NA	193	195	197	359	359	365	344	352	372	346	352	360	191	197	201	173	173	175	220	220	222	156	156	168
2023-PLATE-106_2022-2353_28-Pressure_7500PSI_R1_028	7500 PSI	275	275	283	124	148	164	315	339	343	224	244	244	238	242	246	140	140	144	192	196	224	103	115	115	187	193	193	359	359	NA	336	344	344	346	346	352	191	197	201	173	173	175	220	220	222	156	156	NA
2023-PLATE-106_2022-2353_29-Pressure_7500PSI_R1_029	7500 PSI	275	283	NA	124	148	NA	343	343	NA	224	244	NA	234	234	NA	140	140	NA	200	208	NA	103	115	NA	187	195	NA	359	359	NA	336	372	NA	346	346	360	191	197	NA	173	175	NA	220	222	NA	168	168	NA
2023-PLATE-106_2022-2353_3-Pressure_7500PSI_R1_003	7500 PSI	267	275	275	148	152	164	319	327	327	NA	NA	NA	238	238	242	140	140	NA	188	196	200	103	103	115	187	187	193	359	363	365	336	344	372	346	352	360	197	197	201	175	175	NA	220	220	222	154	154	168
2023-PLATE-106_2022-2353_30-Pressure_7500PSI_R1_030	7500 PSI	275	275	283	148	152	164	315	319	339	224	244	244	234	238	246	140	140	NA	192	196	224	103	115	115	193	195	197	359	359	365	344	352	372	346	352	360	197	197	201	173	173	NA	220	220	222	156	156	168
2023-PLATE-106_2022-2353_31-Pressure_7500PSI_R1_031	7500 PSI	267	275	275	148	152	164	315	339	343	224	244	244	238	242	246	140	140	144	192	208	224	115	115	NA	187	193	195	359	359	NA	336	344	352	352	352	360	191	197	197	173	173	NA	220	220	222	156	156	168
2023-PLATE-106_2022-2353_32-Pressure_7500PSI_R1_032	7500 PSI	275	275	283	148	152	164	315	319	339	224	244	244	238	242	246	140	140	NA	192	196	224	103	115	115	193	195	197	359	359	365	344	352	372	346	346	352	197	197	201	173	173	NA	220	220	222	156	156	168
2023-PLATE-106_2022-2353_33-Pressure_7500PSI_R1_033	7500 PSI	275	283	NA	124	148	NA	343	343	NA	224	244	NA	222	242	NA	140	144	NA	196	200	NA	103	115	NA	187	197	NA	359	363	NA	336	364	NA	346	360	NA	191	201	NA	173	173	NA	220	222	NA	154	156	NA
2023-PLATE-106_2022-2353_34-Pressure_7500PSI_R1_034	7500 PSI	275	275	283	124	148	164	327	343	343	224	224	NA	206	234	238	140	140	144	188	200	208	103	115	115	187	193	193	363	363	365	336	344	372	352	360	360	191	197	201	173	173	175	222	222	NA	154	154	168
2023-PLATE-106_2022-2353_35-Pressure_7500PSI_R1_035	7500 PSI	275	275	283	124	148	164	315	339	343	224	244	244	238	242	246	140	140	NA	192	192	196	115	115	NA	193	195	197	359	359	365	344	352	372	346	346	352	197	197	201	173	173	175	220	220	222	156	156	168
2023-PLATE-106_2022-2353_36-Pressure_7500PSI_R1_036	7500 PSI	267	275	NA	124	148	164	319	343	NA	224	249	NA	222	234	NA	140	144	NA	200	208	NA	103	115	NA	195	197	NA	359	359	NA	364	372	NA	346	346	NA	191	191	NA	173	173	NA	220	222	NA	154	156	NA
2023-PLATE-106_2022-2353_37-Pressure_7500PSI_R1_037	7500 PSI	267	275	275	124	148	164	315	339	343	224	244	244	238	242	246	140	140	NA	192	208	224	103	115	115	193	195	197	359	359	365	344	352	372	346	346	352	197	197	201	173	173	NA	220	220	222	156	156	NA
2023-PLATE-106_2022-2353_38-Pressure_7500PSI_R1_038	7500 PSI	275	275	283	148	152	164	319	327	327	224	224	NA	234	238	238	140	140	NA	188	196	200	103	115	115	187	193	197	365	365	NA	344	372	372	352	360	360	197	201	201	173	175	NA	220	222	222	154	154	168
2023-PLATE-106_2022-2353_39-Pressure_7500PSI_R1_039	7500 PSI	267	275	275	148	152	164	315	319	339	224	244	244	238	242	246	140	140	144	192	208	224	115	115	NA	187	193	195	359	359	NA	336	344	352	352	352	360	191	197	201	173	173	175	220	220	222	156	156	NA
2023-PLATE-106_2022-2353_4-Pressure_7500PSI_R1_004	7500 PSI	275	275	283	148	152	164	315	319	339	224	244	244	238	242	246	140	140	144	192	196	224	115	115	NA	187	193	195	359	359	NA	336	344	352	346	352	360	191	197	201	173	173	NA	220	220	222	156	156	NA
2023-PLATE-106_2022-2353_40-Pressure_7500PSI_R1_040	7500 PSI	275	275	283	148	152	164	315	339	343	224	244	244	238	242	246	140	140	NA	192	208	224	115	115	NA	187	193	195	359	359	NA	336	344	352	346	352	360	197	197	201	173	173	175	220	220	222	156	156	168
2023-PLATE-106_2022-2353_41-Pressure_7500PSI_R1_041	7500 PSI	267	275	275	148	152	164	315	339	343	224	244	244	238	242	246	140	140	NA	192	196	224	103	115	115	193	195	197	359	359	365	344	352	372	346	346	352	197	197	201	173	173	NA	220	220	222	156	156	NA
2023-PLATE-106_2022-2353_42-Pressure_7500PSI_R1_042	7500 PSI	267	275	275	152	164	164	315	339	343	224	244	244	238	242	246	140	140	NA	192	196	224	103	115	115	187	195	195	359	359	NA	336	344	352	346	352	360	197	197	NA	173	173	175	220	220	222	156	156	NA
2023-PLATE-106_2022-2353_43-Pressure_7500PSI_R1_043	7500 PSI	267	275	275	148	152	164	315	339	343	224	244	244	238	242	246	140	140	NA	192	196	224	115	115	NA	187	193	195	359	359	365	336	344	352	346	352	360	197	197	201	173	173	NA	220	220	222	156	156	168
2023-PLATE-106_2022-2353_44-Pressure_7500PSI_R1_044	7500 PSI	275	275	283	124	148	164	315	339	343	224	244	244	238	242	246	140	140	144	192	208	224	115	115	NA	187	193	195	359	359	NA	336	344	352	346	352	360	191	197	201	173	173	175	220	220	222	156	156	168
2023-PLATE-106_2022-2353_45-Pressure_7500PSI_R1_045	7500 PSI	275	275	283	124	148	164	339	339	343	224	244	244	238	242	246	140	140	NA	208	224	224	103	115	115	193	195	197	359	359	365	344	352	372	346	352	360	197	197	201	173	173	NA	220	220	222	156	156	168
2023-PLATE-106_2022-2353_46-Pressure_7500PSI_R1_046	7500 PSI	279	283	NA	124	164	NA	343	343	NA	224	249	NA	222	242	NA	140	144	NA	196	200	NA	103	115	NA	187	197	NA	359	359	NA	336	364	NA	346	346	NA	191	191	NA	173	175	NA	220	222	NA	168	168	NA
2023-PLATE-106_2022-2353_47-Pressure_7500PSI_R1_047	7500 PSI	267	275	NA	148	152	NA	319	343	343	224	244	NA	234	234	NA	140	140	NA	200	208	NA	115	115	NA	195	197	NA	359	365	NA	372	372	NA	346	360	NA	197	201	NA	173	173	NA	222	226	NA	154	156	NA
2023-PLATE-106_2022-2353_48-Pressure_7500PSI_R1_048	7500 PSI	267	275	275	148	152	164	315	319	339	224	244	244	238	242	246	140	140	144	192	196	224	103	115	115	193	195	197	359	359	NA	344	352	372	346	352	360	191	201	201	173	173	NA	220	220	222	156	156	168
2023-PLATE-106_2022-2353_49-Pressure_7500PSI_R1_049	7500 PSI	267	275	275	124	148	164	315	339	343	224	244	244	234	238	246	140	140	NA	192	192	208	103	115	115	187	195	195	359	359	NA	336	344	352	346	352	360	197	197	201	173	173	175	220	220	222	156	156	NA
2023-PLATE-106_2022-2353_5-Pressure_7500PSI_R1_005	7500 PSI	267	275	275	124	148	164	315	319	339	224	244	244	234	238	246	140	140	144	192	208	224	103	115	115	193	195	197	359	359	NA	344	352	372	352	352	360	191	201	201	173	173	NA	220	220	222	156	156	168
2023-PLATE-106_2022-2353_50-Pressure_7500PSI_R1_050	7500 PSI	267	275	275	124	148	164	315	319	339	224	244	244	238	242	246	140	140	NA	196	224	224	103	115	115	187	193	195	359	359	NA	336	344	352	346	352	360	197	201	201	173	173	175	220	220	222	156	156	NA
2023-PLATE-106_2022-2353_51-Pressure_7500PSI_R1_051	7500 PSI	267	275	275	124	148	164	315	339	343	224	244	244	238	242	246	140	140	144	192	196	224	103	115	115	187	195	195	359	359	NA	336	344	352	346	352	360	191	197	201	173	173	NA	220	220	222	156	156	NA
2023-PLATE-106_2022-2353_52-Pressure_7500PSI_R1_052	7500 PSI	275	275	283	148	152	164	315	315	319	224	244	244	234	238	246	140	140	NA	192	208	224	103	115	115	187	193	193	359	359	365	336	344	352	352	352	360	197	197	201	173	173	NA	220	220	222	156	156	NA
2023-PLATE-106_2022-2353_53-Pressure_7500PSI_R1_053	7500 PSI	267	275	NA	152	164	NA	343	343	NA	224	249	NA	234	234	NA	140	140	NA	196	200	NA	103	115	NA	197	197	NA	363	365	NA	364	372	NA	346	346	NA	197	201	NA	173	175	NA	220	222	NA	154	156	NA
2023-PLATE-106_2022-2353_54-Pressure_7500PSI_R1_054	7500 PSI	267	275	275	148	152	164	327	343	343	224	224	NA	206	206	234	140	140	NA	188	196	200	103	103	115	187	187	193	NA	NA	NA	336	344	372	346	352	360	NA	NA	NA	173	175	175	220	222	222	NA	NA	NA
2023-PLATE-106_2022-2353_55-Pressure_7500PSI_R1_055	7500 PSI	267	275	275	148	152	164	343	343	NA	NA	NA	NA	206	238	242	140	140	NA	188	196	200	103	103	115	187	193	197	359	363	365	344	372	372	346	352	360	197	197	201	173	173	NA	222	222	NA	154	154	156
2023-PLATE-106_2022-2353_56-Pressure_7500PSI_R1_056	7500 PSI	275	275	283	148	152	164	315	319	339	224	244	244	234	238	246	140	140	NA	192	196	224	103	115	115	193	195	197	359	359	365	344	352	372	346	346	360	197	197	201	173	173	NA	220	220	222	156	156	NA
2023-PLATE-106_2022-2353_57-Pressure_7500PSI_R1_057	7500 PSI	267	275	275	148	152	164	327	343	343	NA	NA	NA	206	238	242	140	140	144	188	200	208	103	103	115	187	193	197	363	365	365	344	372	372	346	352	352	191	197	201	173	173	NA	220	220	222	154	154	156
2023-PLATE-106_2022-2353_58-Pressure_7500PSI_R1_058	7500 PSI	267	275	275	148	152	164	315	319	339	224	244	244	234	238	246	140	140	NA	192	196	224	103	115	115	193	195	197	359	359	365	344	352	372	346	352	360	197	197	201	173	173	NA	220	220	222	156	156	168
2023-PLATE-106_2022-2353_59-Pressure_7500PSI_R1_059	7500 PSI	275	275	283	124	148	164	315	339	343	224	244	244	238	238	242	140	140	NA	192	208	224	115	115	NA	187	193	193	359	359	NA	336	344	352	346	352	360	197	197	NA	173	173	NA	220	220	222	156	156	168
2023-PLATE-106_2022-2353_6-Pressure_7500PSI_R1_006	7500 PSI	275	275	283	148	152	164	315	339	343	224	244	244	238	242	246	140	140	144	208	224	224	115	115	NA	193	193	197	359	359	365	344	352	372	346	346	352	191	201	201	173	173	175	220	220	222	156	156	NA
2023-PLATE-106_2022-2353_60-Pressure_7500PSI_R1_060	7500 PSI	267	275	275	148	152	164	315	339	343	224	244	244	234	238	246	140	140	144	192	196	224	103	115	115	193	195	197	359	359	NA	344	352	372	346	346	352	191	197	201	173	173	175	220	220	222	156	156	NA
2023-PLATE-106_2022-2353_61-Pressure_7500PSI_R1_061	7500 PSI	275	275	283	124	148	164	315	319	339	224	244	244	238	242	246	140	140	144	192	196	224	103	115	115	187	193	195	359	359	NA	336	344	352	346	352	360	191	197	201	173	173	175	220	220	222	156	156	168
2023-PLATE-106_2022-2353_62-Pressure_7500PSI_R1_062	7500 PSI	275	275	283	124	148	164	315	339	343	224	244	244	238	242	246	140	140	NA	192	196	224	103	115	115	187	193	195	359	359	NA	336	344	352	346	352	360	197	197	201	173	173	175	220	220	222	156	156	168
2023-PLATE-106_2022-2353_63-Pressure_7500PSI_R1_063	7500 PSI	267	279	NA	148	152	NA	319	343	NA	224	244	NA	234	234	NA	140	140	NA	200	208	NA	103	115	NA	197	197	NA	363	365	NA	364	372	NA	346	346	NA	197	201	NA	173	173	NA	220	222	NA	156	168	NA
2023-PLATE-106_2022-2353_64-Pressure_7500PSI_R1_064	7500 PSI	267	275	275	148	152	164	315	339	343	224	244	244	238	242	246	140	140	NA	192	208	224	115	115	NA	187	193	193	NA	NA	NA	336	344	352	346	346	352	NA	NA	NA	173	173	175	220	220	222	NA	NA	NA
2023-PLATE-106_2022-2353_65-Pressure_7500PSI_R1_065	7500 PSI	267	275	275	124	148	164	315	319	339	224	244	244	234	238	246	140	140	144	192	208	224	115	115	NA	193	195	197	359	359	365	344	352	372	346	346	352	191	197	201	173	173	NA	220	220	222	156	156	NA
2023-PLATE-106_2022-2353_66-Pressure_7500PSI_R1_066	7500 PSI	267	275	275	148	152	164	315	339	343	224	244	244	234	238	246	140	140	NA	208	224	224	115	115	NA	187	193	195	359	359	NA	336	344	352	346	352	360	197	197	201	173	173	NA	220	220	222	156	156	168
2023-PLATE-106_2022-2353_67-Pressure_7500PSI_R1_067	7500 PSI	275	275	283	148	152	164	315	339	343	224	244	244	234	238	246	140	140	144	192	208	224	103	115	115	193	195	197	359	359	365	344	352	372	346	352	360	191	201	201	173	173	NA	220	220	222	156	156	168
2023-PLATE-106_2022-2353_68-Pressure_7500PSI_R1_068	7500 PSI	267	275	275	124	164	164	315	339	343	224	244	244	238	242	246	140	140	NA	192	196	224	103	115	115	193	195	197	359	359	365	344	352	372	346	352	360	197	201	201	173	173	NA	220	220	222	156	156	NA
2023-PLATE-106_2022-2353_69-Pressure_7500PSI_R1_069	7500 PSI	267	275	275	148	152	164	319	327	327	224	224	NA	206	234	238	140	140	144	188	200	208	103	103	115	187	193	193	359	363	363	336	344	372	352	360	360	191	197	201	173	173	175	220	220	222	154	154	156
2023-PLATE-106_2022-2353_7-Pressure_7500PSI_R1_007	7500 PSI	275	275	283	124	148	164	315	319	339	224	244	244	234	238	246	140	140	144	192	196	224	103	115	115	187	193	195	359	359	NA	336	344	352	346	346	352	191	197	197	173	173	175	220	220	222	156	156	168
2023-PLATE-106_2022-2353_70-Pressure_7500PSI_R1_070	7500 PSI	267	275	275	148	152	164	327	343	343	NA	NA	NA	238	238	242	140	140	NA	188	196	200	103	103	115	187	187	193	359	363	365	336	344	372	352	360	360	197	197	201	173	175	175	220	222	222	154	154	168
2023-PLATE-106_2022-2353_71-Pressure_7500PSI_R1_071	7500 PSI	275	275	283	124	148	164	315	319	339	NA	NA	NA	238	242	246	140	140	NA	192	208	224	115	115	NA	187	193	193	359	359	NA	336	344	352	346	346	352	197	197	201	173	173	NA	220	220	222	156	156	NA
2023-PLATE-106_2022-2353_72-Pressure_7500PSI_R1_072	7500 PSI	267	275	275	124	148	164	315	319	339	224	244	244	238	242	246	140	140	144	192	192	196	115	115	NA	187	193	195	359	359	NA	336	344	352	346	346	352	191	197	201	173	173	175	220	220	222	156	156	NA
2023-PLATE-106_2022-2353_73-Pressure_7500PSI_R1_073	7500 PSI	275	275	283	148	152	164	315	319	339	224	244	244	234	238	246	140	140	NA	208	224	224	103	115	115	193	195	197	359	359	365	344	352	372	346	352	352	197	197	201	173	173	175	220	220	222	156	156	168
2023-PLATE-106_2022-2353_74-Pressure_7500PSI_R1_074	7500 PSI	275	275	283	148	152	164	315	319	339	224	244	244	234	238	246	140	140	144	192	208	224	103	115	115	187	193	195	359	359	NA	336	344	352	346	346	352	191	197	201	173	173	175	220	220	222	156	156	168
2023-PLATE-106_2022-2353_75-Pressure_7500PSI_R1_075	7500 PSI	275	275	283	152	164	164	343	343	NA	NA	NA	NA	206	238	242	140	140	144	200	200	208	103	115	115	187	187	193	363	363	365	336	344	372	346	352	352	191	197	201	175	175	NA	220	222	222	154	154	168
2023-PLATE-106_2022-2353_8-Pressure_7500PSI_R1_008	7500 PSI	275	275	283	124	148	164	319	327	343	NA	NA	NA	206	234	238	140	140	NA	188	196	200	103	103	115	193	193	197	359	363	363	344	344	372	346	360	360	197	197	201	175	175	NA	220	222	222	154	154	168
2023-PLATE-106_2022-2353_9-Pressure_7500PSI_R1_009	7500 PSI	267	275	275	124	148	164	319	327	343	NA	NA	NA	206	238	242	140	140	144	188	200	208	115	115	NA	187	193	197	359	363	365	344	372	372	352	352	360	191	197	201	175	175	NA	220	222	222	154	154	168
2023-PLATE-106_2023-435_188-Pressure_6500PSI_R2_123	6500 PSI	267	275	NA	124	164	NA	339	343	NA	224	244	NA	234	246	NA	140	144	NA	196	224	NA	115	115	NA	187	193	NA	359	359	NA	336	344	NA	346	352	NA	191	197	NA	173	173	NA	220	222	NA	156	168	NA
2023-PLATE-106_2023-435_189-Pressure_6500PSI_R2_124	6500 PSI	267	279	NA	148	152	NA	319	343	NA	224	244	NA	234	242	NA	140	140	NA	200	208	NA	103	115	NA	197	197	NA	363	365	NA	364	372	NA	346	360	NA	191	197	NA	173	173	NA	222	226	NA	154	168	NA
2023-PLATE-106_2023-435_190-Pressure_6500PSI_R2_125	6500 PSI	267	275	NA	124	148	NA	319	343	NA	224	244	NA	234	234	NA	140	144	NA	200	208	NA	115	115	NA	187	197	NA	363	365	NA	336	372	NA	346	346	NA	191	191	NA	173	173	NA	222	226	NA	156	168	NA
2023-PLATE-106_2023-435_191-Pressure_6500PSI_R2_126	6500 PSI	275	283	NA	124	148	NA	319	343	NA	224	249	NA	222	242	NA	140	144	NA	200	208	NA	103	115	NA	187	197	NA	359	363	NA	336	372	NA	346	346	NA	191	201	NA	173	173	NA	220	222	NA	156	168	168
2023-PLATE-106_2023-435_192-Pressure_6500PSI_R2_127	6500 PSI	275	283	NA	124	148	NA	319	343	NA	224	249	NA	222	242	NA	140	140	NA	200	208	NA	103	115	NA	195	197	NA	359	365	NA	372	372	NA	346	360	NA	197	201	NA	173	173	NA	222	226	NA	154	168	NA
2023-PLATE-106_2023-435_193-Pressure_6500PSI_R2_128	6500 PSI	267	275	NA	124	164	NA	319	343	NA	224	249	NA	222	242	NA	140	144	NA	200	208	NA	115	115	NA	195	197	NA	359	365	NA	372	372	NA	346	346	NA	191	191	NA	173	173	NA	220	222	NA	154	156	NA
2023-PLATE-106_2023-435_194-Pressure_6500PSI_R2_129	6500 PSI	279	283	NA	124	148	NA	319	343	NA	224	249	NA	222	242	NA	140	144	NA	196	200	NA	115	115	NA	195	197	NA	359	365	NA	372	372	NA	346	360	NA	191	201	NA	173	173	NA	220	222	NA	168	168	NA
2023-PLATE-106_2023-435_195-Pressure_6500PSI_R2_131	6500 PSI	267	275	275	148	152	164	315	339	343	224	244	244	234	238	246	140	140	144	192	208	224	103	115	115	187	193	195	359	359	NA	336	344	352	346	346	352	191	197	201	173	173	175	220	220	222	156	156	168
2023-PLATE-106_2023-435_196-Pressure_6500PSI_R2_132	6500 PSI	279	283	NA	152	164	NA	319	343	NA	224	244	NA	222	234	NA	140	144	NA	200	208	NA	103	115	NA	195	197	NA	359	359	NA	372	372	NA	346	360	NA	191	201	NA	173	175	NA	220	222	NA	154	168	NA
2023-PLATE-106_2023-435_197-Pressure_6500PSI_R2_133	6500 PSI	275	283	NA	148	152	NA	319	327	NA	NA	NA	NA	238	242	NA	140	140	NA	196	200	NA	115	115	NA	193	197	NA	363	365	NA	344	372	NA	346	360	NA	197	201	NA	173	173	NA	222	222	NA	154	156	NA
2023-PLATE-106_2023-435_198-Pressure_6500PSI_R2_134	6500 PSI	267	275	NA	124	164	NA	327	343	NA	224	224	NA	206	234	NA	140	144	NA	200	208	NA	103	115	NA	193	197	NA	359	363	NA	344	372	NA	360	360	NA	191	201	NA	173	173	NA	222	222	NA	154	168	NA
2023-PLATE-106_2023-435_199-Pressure_6500PSI_R2_136	6500 PSI	279	283	NA	124	148	NA	319	343	NA	224	244	NA	222	234	NA	140	144	NA	196	200	NA	103	115	NA	195	197	NA	359	365	NA	372	372	NA	346	360	NA	191	201	NA	173	173	NA	222	226	NA	156	168	NA
2023-PLATE-106_2023-435_200-Pressure_6500PSI_R2_137	6500 PSI	267	275	NA	148	152	NA	315	319	NA	224	244	NA	234	246	NA	140	140	NA	192	196	NA	115	115	NA	195	197	NA	359	365	NA	352	372	NA	346	360	NA	197	201	NA	173	175	NA	220	222	NA	156	168	NA
2023-PLATE-106_2023-435_201-Pressure_6500PSI_R2_138	6500 PSI	267	275	NA	152	164	NA	319	343	NA	224	249	NA	234	242	NA	140	144	NA	196	200	NA	115	115	NA	197	197	NA	359	363	NA	364	372	NA	346	346	NA	191	191	NA	173	173	NA	220	222	NA	154	156	NA
2023-PLATE-106_2023-435_202-Pressure_6500PSI_R2_139	6500 PSI	267	275	NA	124	148	NA	319	327	NA	NA	NA	NA	238	242	NA	140	144	NA	188	196	NA	103	115	NA	187	187	NA	359	365	NA	336	344	NA	352	360	NA	191	201	NA	175	175	NA	220	222	NA	154	156	NA
2023-PLATE-106_2023-435_203-Pressure_6500PSI_R2_141	6500 PSI	279	283	NA	152	164	NA	319	343	NA	224	249	NA	234	234	NA	140	140	NA	196	200	NA	103	115	NA	187	195	NA	359	359	NA	336	372	NA	346	346	NA	191	197	NA	173	175	NA	220	222	NA	156	168	NA
2023-PLATE-106_2023-435_204-Pressure_6500PSI_R2_144	6500 PSI	275	283	NA	152	164	NA	319	343	NA	224	244	NA	222	242	NA	140	144	NA	200	208	NA	115	115	NA	197	197	NA	363	365	NA	364	372	NA	346	360	NA	191	191	NA	173	175	NA	220	222	NA	154	168	NA
2023-PLATE-106_2023-435_205-Pressure_6500PSI_R2_146	6500 PSI	267	275	NA	148	152	NA	343	343	NA	224	224	NA	238	242	NA	140	144	NA	188	208	NA	103	115	NA	193	197	NA	365	365	NA	344	372	NA	352	360	NA	191	197	NA	173	173	NA	222	222	NA	154	168	NA
2023-PLATE-106_2023-435_206-Pressure_6500PSI_R2_147	6500 PSI	279	283	NA	148	152	NA	343	343	NA	224	244	NA	222	242	NA	140	140	NA	196	200	NA	115	115	NA	187	197	NA	359	363	NA	336	364	NA	346	346	NA	197	201	NA	173	175	NA	222	226	NA	154	168	NA
2023-PLATE-107_2022-2353_100-Pressure_7500PSI_R1_100	7500 PSI	275	275	283	124	148	164	315	315	319	224	244	244	234	238	246	140	140	NA	192	208	224	115	115	NA	193	193	197	359	359	NA	344	352	372	346	352	360	197	197	201	173	173	NA	220	220	222	156	156	168
2023-PLATE-107_2022-2353_101-Pressure_7500PSI_R2_001	7500 PSI	267	275	275	124	148	164	315	339	343	224	244	244	238	242	246	140	140	144	192	196	224	115	115	NA	195	195	197	359	359	NA	344	352	372	346	352	360	191	197	201	173	173	NA	220	220	222	156	156	NA
2023-PLATE-107_2022-2353_102-Pressure_7500PSI_R2_002	7500 PSI	267	275	275	148	152	164	315	339	343	224	244	244	238	242	246	140	140	144	192	196	224	103	115	115	193	195	197	359	359	365	344	352	372	346	352	360	191	197	197	173	173	175	220	220	222	156	156	168
2023-PLATE-107_2022-2353_103-Pressure_7500PSI_R2_003	7500 PSI	267	275	275	148	152	164	319	343	343	224	244	249	234	234	242	140	140	144	196	200	200	103	115	115	195	197	197	359	363	365	364	372	372	346	346	360	191	191	201	173	173	175	222	226	226	154	156	168
2023-PLATE-107_2022-2353_104-Pressure_7500PSI_R2_004	7500 PSI	275	275	283	124	148	164	319	343	343	NA	NA	NA	206	238	242	140	140	NA	188	200	208	103	115	115	187	193	193	359	363	363	336	344	372	352	360	360	197	197	201	173	175	175	220	222	222	154	154	156
2023-PLATE-107_2022-2353_105-Pressure_7500PSI_R2_005	7500 PSI	275	275	283	148	152	164	327	343	343	NA	NA	NA	234	238	238	140	140	144	188	196	200	103	115	115	187	193	197	363	365	365	344	372	372	352	360	360	191	201	201	173	175	175	220	222	222	154	154	168
2023-PLATE-107_2022-2353_106-Pressure_7500PSI_R2_006	7500 PSI	267	275	275	124	148	164	343	343	NA	224	244	249	222	234	234	140	140	NA	196	200	200	115	115	NA	195	197	197	359	363	365	364	372	372	346	346	NA	191	197	201	173	173	NA	220	222	226	154	168	168
2023-PLATE-107_2022-2353_107-Pressure_7500PSI_R2_007	7500 PSI	275	275	283	148	152	164	315	319	339	224	244	244	234	238	246	140	140	144	192	208	224	103	115	115	193	195	197	359	359	365	344	352	372	346	352	360	191	197	201	173	173	NA	220	220	222	156	156	NA
2023-PLATE-107_2022-2353_108-Pressure_7500PSI_R2_008	7500 PSI	279	279	283	148	152	164	343	343	NA	224	244	249	222	234	242	140	140	NA	200	200	208	115	115	NA	187	195	197	359	359	363	336	364	372	346	346	NA	191	197	201	173	173	175	222	226	226	154	154	156
2023-PLATE-107_2022-2353_109-Pressure_7500PSI_R2_009	7500 PSI	275	275	283	148	152	164	315	339	343	224	244	244	238	242	246	140	140	NA	192	208	224	103	115	115	187	193	195	359	359	NA	336	344	352	346	352	360	197	197	201	173	173	175	220	220	222	156	156	168
2023-PLATE-107_2022-2353_110-Pressure_7500PSI_R2_010	7500 PSI	267	279	279	124	148	164	343	343	NA	224	244	249	222	234	234	140	140	NA	200	200	208	103	115	115	195	197	197	359	359	363	364	372	372	346	346	NA	191	197	201	173	173	NA	220	222	226	154	168	168
2023-PLATE-107_2022-2353_111-Pressure_7500PSI_R2_011	7500 PSI	275	275	283	148	152	164	315	319	339	224	244	244	234	238	246	140	140	NA	192	196	224	103	115	115	187	193	195	359	359	365	336	344	352	346	352	352	197	197	201	173	173	NA	220	220	222	156	156	NA
2023-PLATE-107_2022-2353_112-Pressure_7500PSI_R2_012	7500 PSI	267	275	279	124	148	164	319	343	343	224	244	249	222	234	234	140	140	144	200	200	208	103	115	115	195	197	197	359	359	363	364	372	372	346	346	NA	191	191	201	173	173	NA	220	222	226	154	168	168
2023-PLATE-107_2022-2353_113-Pressure_7500PSI_R2_013	7500 PSI	267	279	279	148	152	164	343	343	NA	224	244	249	222	234	242	140	140	NA	200	200	208	103	115	115	187	195	197	363	363	365	336	364	372	346	346	360	191	197	201	173	173	NA	222	226	226	154	156	168
2023-PLATE-107_2022-2353_114-Pressure_7500PSI_R2_014	7500 PSI	279	279	283	124	148	164	319	343	343	224	244	249	222	234	234	140	140	NA	200	200	208	115	115	NA	195	195	197	359	359	365	372	372	NA	346	346	360	191	197	201	173	173	175	220	222	226	154	168	168
2023-PLATE-107_2022-2353_115-Pressure_7500PSI_R2_015	7500 PSI	267	275	275	124	148	164	315	339	343	224	244	244	234	238	246	140	140	NA	192	196	224	103	115	115	187	193	195	359	359	NA	336	344	352	346	346	352	197	197	201	173	173	NA	220	220	222	156	156	NA
2023-PLATE-107_2022-2353_116-Pressure_7500PSI_R2_016	7500 PSI	267	279	279	124	148	164	343	343	NA	224	244	249	222	234	234	140	140	144	196	200	200	115	115	NA	195	197	197	359	363	365	364	372	372	346	346	NA	191	191	201	173	173	175	220	222	226	156	168	168
2023-PLATE-107_2022-2353_117-Pressure_7500PSI_R2_017	7500 PSI	275	279	283	148	152	164	343	343	NA	224	244	249	222	234	242	140	140	144	200	200	208	115	115	NA	187	195	197	359	359	NA	336	364	372	346	346	360	191	191	201	173	173	175	220	222	226	168	168	NA
2023-PLATE-107_2022-2353_118-Pressure_7500PSI_R2_018	7500 PSI	275	275	283	148	152	164	315	339	343	224	244	244	234	238	246	140	140	144	192	196	224	115	115	NA	187	193	195	359	359	365	336	344	352	346	346	352	191	197	201	173	173	175	220	220	222	156	156	NA
2023-PLATE-107_2022-2353_119-Pressure_7500PSI_R2_019	7500 PSI	275	275	283	124	148	164	315	319	339	224	244	244	234	238	246	140	140	NA	192	208	224	115	115	NA	193	195	197	359	359	NA	344	352	372	346	346	352	197	197	201	173	173	175	220	220	222	156	156	NA
2023-PLATE-107_2022-2353_120-Pressure_7500PSI_R2_020	7500 PSI	NA	NA	NA	NA	NA	NA	NA	NA	NA	224	244	NA	NA	NA	NA	140	140	144	192	196	224	115	115	NA	187	193	195	359	359	NA	NA	NA	NA	NA	NA	NA	NA	NA	NA	173	173	NA	NA	NA	NA	156	156	NA
2023-PLATE-107_2022-2353_121-Pressure_7500PSI_R2_021	7500 PSI	275	275	283	148	152	164	315	319	339	224	244	244	234	238	246	140	140	NA	192	208	224	103	115	115	187	193	195	359	359	NA	336	344	352	346	352	360	197	201	201	173	173	175	220	220	222	156	156	NA
2023-PLATE-107_2022-2353_122-Pressure_7500PSI_R2_022	7500 PSI	275	279	283	148	152	164	343	343	NA	224	244	249	222	234	242	140	140	144	196	200	200	103	115	115	195	197	197	359	359	365	364	372	372	346	346	360	191	191	201	173	173	175	220	222	226	156	168	168
2023-PLATE-107_2022-2353_123-Pressure_7500PSI_R2_023	7500 PSI	267	275	275	124	148	164	319	343	343	224	244	249	222	234	242	140	140	144	200	200	208	115	115	NA	187	197	197	359	363	363	336	364	372	346	346	360	191	191	201	173	173	NA	220	222	226	154	156	168
2023-PLATE-107_2022-2353_124-Pressure_7500PSI_R2_024	7500 PSI	267	275	275	148	152	164	319	327	343	224	224	NA	206	238	242	140	140	144	188	196	200	103	115	115	187	187	197	365	365	NA	344	372	372	346	360	360	191	197	201	175	175	NA	220	222	222	154	154	168
2023-PLATE-107_2022-2353_125-Pressure_7500PSI_R2_025	7500 PSI	267	275	275	124	148	164	319	327	343	224	224	NA	206	206	242	140	140	NA	188	200	208	103	103	115	187	193	193	359	363	363	336	344	372	346	360	360	197	197	201	173	175	175	220	222	222	154	154	168
2023-PLATE-107_2022-2353_126-Pressure_7500PSI_R2_026	7500 PSI	275	275	283	124	148	164	315	339	343	224	244	244	234	238	246	140	140	NA	192	208	224	115	115	NA	187	195	195	359	359	NA	336	344	352	346	346	352	197	201	201	173	173	175	220	220	222	156	156	NA
2023-PLATE-107_2022-2353_127-Pressure_7500PSI_R2_027	7500 PSI	267	275	275	148	152	164	315	319	339	224	244	244	238	242	246	140	140	144	192	196	224	103	115	115	187	195	195	359	359	NA	336	344	352	346	352	360	191	197	201	173	173	175	220	220	222	156	156	168
2023-PLATE-107_2022-2353_128-Pressure_7500PSI_R2_028	7500 PSI	267	275	275	148	152	164	315	319	339	NA	NA	NA	234	238	246	140	140	144	192	208	224	103	115	115	193	195	197	359	359	365	344	352	372	346	352	360	191	197	201	173	173	NA	220	220	222	156	156	NA
2023-PLATE-107_2022-2353_129-Pressure_7500PSI_R2_029	7500 PSI	267	275	275	124	148	164	319	343	343	224	244	249	222	234	242	140	140	NA	200	200	208	115	115	NA	195	195	197	359	359	NA	364	372	372	346	346	NA	191	197	201	173	173	NA	220	222	226	154	168	168
2023-PLATE-107_2022-2353_130-Pressure_7500PSI_R2_030	7500 PSI	275	275	283	124	148	164	315	339	343	224	244	244	238	242	246	140	140	144	192	196	224	103	115	115	187	195	195	359	359	NA	336	352	352	346	352	360	191	197	201	173	173	175	220	220	222	156	156	NA
2023-PLATE-107_2022-2353_131-Pressure_7500PSI_R2_031	7500 PSI	267	275	275	148	152	164	343	343	NA	224	244	249	222	222	242	140	140	NA	196	200	200	115	115	NA	195	197	197	359	359	363	364	372	372	346	346	360	191	197	201	173	173	NA	220	222	226	154	156	168
2023-PLATE-107_2022-2353_132-Pressure_7500PSI_R2_032	7500 PSI	275	279	283	148	152	164	319	343	343	224	244	249	222	234	234	140	140	NA	200	200	208	NA	NA	NA	195	197	197	359	359	365	364	372	372	346	346	360	191	197	201	173	173	NA	220	222	226	154	168	168
2023-PLATE-107_2022-2353_133-Pressure_7500PSI_R2_033	7500 PSI	279	279	283	124	148	164	319	343	343	224	244	249	234	234	242	140	140	NA	200	200	208	103	115	115	195	197	197	359	363	365	364	372	372	346	346	NA	197	201	201	173	173	175	220	222	226	154	168	168
2023-PLATE-107_2022-2353_134-Pressure_7500PSI_R2_034	7500 PSI	275	283	NA	124	164	NA	343	343	NA	224	244	NA	234	242	NA	140	140	NA	200	208	NA	103	115	NA	195	197	NA	359	365	NA	364	372	NA	346	360	NA	191	197	NA	173	173	NA	220	222	NA	154	168	NA
2023-PLATE-107_2022-2353_135-Pressure_7500PSI_R2_035	7500 PSI	275	275	283	124	148	164	315	319	339	224	244	244	238	242	246	140	140	144	192	208	224	103	115	115	195	195	197	359	359	365	344	352	372	346	352	360	191	197	201	173	173	NA	220	220	222	156	156	NA
2023-PLATE-107_2022-2353_136-Pressure_7500PSI_R2_036	7500 PSI	267	275	279	124	148	164	319	343	343	224	244	249	222	234	234	140	140	144	196	200	200	103	115	115	187	195	197	359	359	363	336	364	372	346	346	360	191	201	201	173	173	175	220	222	226	154	154	156
2023-PLATE-107_2022-2353_137-Pressure_7500PSI_R2_037	7500 PSI	275	275	283	124	148	164	319	327	343	NA	NA	NA	206	238	242	140	140	NA	188	200	208	103	115	115	187	187	193	359	363	365	336	344	372	360	360	NA	197	197	201	173	175	175	220	222	222	154	154	156
2023-PLATE-107_2022-2353_138-Pressure_7500PSI_R2_038	7500 PSI	267	279	279	124	148	164	319	343	343	224	244	249	222	234	242	140	140	NA	196	200	200	115	115	NA	187	195	197	359	359	363	336	364	372	346	346	NA	191	197	201	173	173	175	220	222	226	154	168	168
2023-PLATE-107_2022-2353_139-Pressure_7500PSI_R2_039	7500 PSI	267	275	275	124	148	164	315	339	343	224	244	244	238	242	246	140	140	144	192	196	224	115	115	NA	193	195	197	359	359	365	344	352	372	346	352	360	191	197	201	173	173	175	220	220	222	156	156	168
2023-PLATE-107_2022-2353_140-Pressure_7500PSI_R2_040	7500 PSI	267	275	275	148	152	164	315	339	343	224	244	244	238	242	246	140	140	144	192	196	224	103	115	115	187	195	195	359	359	NA	336	344	352	352	352	360	191	197	197	173	173	175	220	220	222	156	156	NA
2023-PLATE-107_2022-2353_141-Pressure_7500PSI_R2_041	7500 PSI	275	275	283	148	148	152	319	327	343	NA	NA	NA	206	238	242	140	140	144	188	200	208	103	115	115	187	193	197	363	365	365	344	372	372	352	352	360	191	197	201	173	173	175	220	222	222	154	154	168
2023-PLATE-107_2022-2353_142-Pressure_7500PSI_R2_042	7500 PSI	267	275	275	148	152	164	315	319	339	NA	NA	NA	234	238	246	140	140	NA	192	196	224	NA	NA	NA	187	193	195	359	359	NA	336	344	352	346	352	360	197	197	201	173	173	NA	220	220	222	156	156	168
2023-PLATE-107_2022-2353_143-Pressure_7500PSI_R2_043	7500 PSI	275	275	283	124	148	164	315	319	339	NA	NA	NA	238	242	246	140	140	144	192	196	224	103	115	115	193	193	197	359	359	365	344	344	372	346	346	352	191	197	201	173	173	175	220	220	222	156	156	NA
2023-PLATE-107_2022-2353_144-Pressure_7500PSI_R2_044	7500 PSI	267	279	279	148	152	164	319	343	343	224	244	249	234	234	242	140	140	144	196	200	200	NA	NA	NA	187	195	197	359	359	363	336	364	372	346	346	NA	191	191	201	173	173	175	220	222	226	154	168	168
2023-PLATE-107_2022-2353_145-Pressure_7500PSI_R2_045	7500 PSI	267	275	275	148	152	164	327	343	343	224	224	NA	206	234	238	140	140	144	188	188	196	103	115	115	187	187	193	363	365	365	336	344	372	360	360	NA	191	197	201	173	173	NA	220	222	222	154	154	156
2023-PLATE-107_2022-2353_146-Pressure_7500PSI_R2_046	7500 PSI	267	275	275	148	152	164	315	319	339	NA	NA	NA	234	238	246	140	140	NA	192	196	224	103	115	115	193	195	197	359	359	365	344	352	372	346	346	352	197	197	201	173	173	175	220	220	222	156	156	NA
2023-PLATE-107_2022-2353_147-Pressure_7500PSI_R2_047	7500 PSI	279	279	283	124	148	164	319	343	343	224	244	249	222	234	242	140	140	NA	200	200	208	103	115	115	195	197	197	359	363	365	364	372	372	346	346	360	197	201	201	173	173	175	222	226	NA	154	156	168
2023-PLATE-107_2022-2353_148-Pressure_7500PSI_R2_048	7500 PSI	267	275	275	148	152	164	315	339	343	224	244	244	234	238	246	140	140	NA	196	224	224	103	115	115	187	193	195	359	359	NA	336	344	352	346	346	360	197	197	201	173	173	175	220	220	222	156	156	NA
2023-PLATE-107_2022-2353_149-Pressure_7500PSI_R2_049	7500 PSI	275	275	283	124	148	164	315	339	343	224	244	244	238	242	246	140	140	NA	192	196	224	115	115	NA	187	193	195	359	359	NA	336	344	352	346	352	360	197	197	201	173	173	175	220	220	222	156	156	NA
2023-PLATE-107_2022-2353_150-Pressure_7500PSI_R2_050	7500 PSI	275	275	283	148	152	164	343	343	NA	224	244	249	222	234	242	140	140	144	196	200	200	NA	NA	NA	187	195	197	359	359	363	336	364	372	346	346	NA	191	191	NA	173	173	NA	220	222	226	154	154	156
2023-PLATE-107_2022-2353_151-Pressure_7500PSI_R2_051	7500 PSI	275	275	283	124	148	164	319	327	343	NA	NA	NA	206	234	238	140	140	NA	188	200	208	103	115	115	187	193	197	363	365	365	344	372	372	346	352	352	197	197	201	173	175	175	222	222	NA	154	154	168
2023-PLATE-107_2022-2353_152-Pressure_7500PSI_R2_052	7500 PSI	275	275	283	148	152	164	319	327	343	224	224	NA	206	206	242	140	140	NA	188	188	208	NA	NA	NA	187	187	193	363	365	365	336	344	372	352	360	360	197	197	201	173	173	175	220	222	222	154	154	156
2023-PLATE-107_2022-2353_153-Pressure_7500PSI_R2_053	7500 PSI	275	275	283	124	148	164	315	319	339	224	244	244	238	242	246	140	140	NA	192	196	224	103	115	115	193	195	197	359	359	365	344	352	372	346	346	352	197	197	201	173	173	175	220	220	222	156	156	NA
2023-PLATE-107_2022-2353_154-Pressure_7500PSI_R2_054	7500 PSI	267	275	279	148	152	164	343	343	NA	224	244	249	222	234	242	140	140	144	200	200	208	103	115	115	187	195	197	359	359	363	336	364	372	346	346	NA	191	201	201	173	173	175	220	222	226	154	168	168
2023-PLATE-107_2022-2353_155-Pressure_7500PSI_R2_055	7500 PSI	267	275	275	148	148	152	319	343	343	224	244	249	222	234	234	140	140	NA	196	200	200	NA	NA	NA	197	197	NA	359	363	365	364	372	372	346	346	NA	197	201	201	173	173	175	222	226	226	154	168	168
2023-PLATE-107_2022-2353_156-Pressure_7500PSI_R2_056	7500 PSI	275	275	283	124	148	164	315	319	339	224	244	244	238	242	246	140	140	NA	192	208	224	103	115	115	187	193	195	359	359	NA	336	344	352	346	352	360	197	197	201	173	173	NA	220	220	222	156	156	168
2023-PLATE-107_2022-2353_76-Pressure_7500PSI_R1_076	7500 PSI	267	275	275	148	152	164	315	319	339	224	244	244	234	238	246	140	140	NA	192	208	224	115	115	NA	187	195	195	359	359	NA	336	344	352	346	352	360	197	197	NA	173	173	175	220	220	222	156	156	168
2023-PLATE-107_2022-2353_77-Pressure_7500PSI_R1_077	7500 PSI	267	275	275	124	148	164	319	327	343	NA	NA	NA	206	238	242	140	140	NA	188	188	196	103	103	115	187	193	197	359	363	365	344	372	372	346	352	360	197	197	201	173	173	NA	220	222	222	154	154	156
2023-PLATE-107_2022-2353_78-Pressure_7500PSI_R1_078	7500 PSI	267	275	275	124	148	164	315	319	339	224	244	244	238	242	246	140	140	NA	196	224	224	103	115	115	187	193	195	359	359	NA	336	344	352	346	352	360	197	197	201	173	173	NA	220	220	222	156	156	NA
2023-PLATE-107_2022-2353_79-Pressure_7500PSI_R1_079	7500 PSI	275	283	NA	148	152	NA	319	343	NA	224	249	NA	222	242	NA	140	140	NA	196	200	NA	115	115	NA	187	195	NA	359	365	NA	336	364	NA	346	360	NA	197	201	NA	173	175	NA	220	222	NA	156	168	NA
2023-PLATE-107_2022-2353_80-Pressure_7500PSI_R1_080	7500 PSI	267	275	275	124	148	164	315	339	343	NA	NA	NA	238	242	246	140	140	144	192	196	224	103	115	115	187	193	195	359	359	NA	336	344	352	346	346	NA	191	197	201	173	173	NA	220	220	222	156	156	NA
2023-PLATE-107_2022-2353_81-Pressure_7500PSI_R1_081	7500 PSI	267	279	279	124	148	164	343	343	NA	224	244	249	222	234	242	140	140	NA	196	200	200	103	115	115	187	195	197	359	359	363	336	364	372	346	346	360	191	197	201	173	173	NA	220	222	226	154	168	168
2023-PLATE-107_2022-2353_82-Pressure_7500PSI_R1_082	7500 PSI	275	283	NA	148	152	NA	343	343	NA	224	244	NA	222	234	NA	140	140	NA	196	200	NA	103	115	NA	187	197	NA	359	363	NA	336	364	NA	346	346	NA	191	197	NA	173	173	NA	220	222	NA	154	156	NA
2023-PLATE-107_2022-2353_83-Pressure_7500PSI_R1_083	7500 PSI	267	275	275	148	152	164	315	319	339	224	244	244	238	242	246	140	140	NA	192	192	196	103	115	115	187	193	195	359	359	NA	336	344	352	346	352	360	197	197	NA	173	173	175	220	220	222	156	156	NA
2023-PLATE-107_2022-2353_84-Pressure_7500PSI_R1_084	7500 PSI	275	275	283	148	152	164	319	327	343	NA	NA	NA	206	238	242	140	140	144	188	200	208	103	115	115	187	187	197	365	365	NA	344	372	372	346	352	360	191	197	201	175	175	NA	220	222	222	154	154	156
2023-PLATE-107_2022-2353_85-Pressure_7500PSI_R1_085	7500 PSI	275	275	283	148	152	164	315	319	339	NA	NA	NA	238	238	242	140	140	144	192	196	224	103	115	115	187	193	195	359	359	NA	336	344	352	346	346	352	191	201	201	173	173	NA	220	220	222	156	156	NA
2023-PLATE-107_2022-2353_86-Pressure_7500PSI_R1_086	7500 PSI	275	275	283	124	164	164	319	327	343	NA	NA	NA	206	238	242	140	140	NA	188	196	200	103	103	NA	187	193	193	359	363	363	336	344	372	352	352	360	197	197	201	173	173	175	222	222	NA	154	154	168
2023-PLATE-107_2022-2353_87-Pressure_7500PSI_R1_087	7500 PSI	275	275	283	148	152	164	315	319	339	224	244	244	234	238	246	140	140	NA	192	208	224	115	115	NA	193	195	197	359	359	365	344	352	372	346	346	352	197	201	201	173	173	NA	220	220	222	156	156	NA
2023-PLATE-107_2022-2353_88-Pressure_7500PSI_R1_088	7500 PSI	267	275	275	148	152	164	319	327	343	224	224	NA	206	238	242	140	140	144	188	200	208	103	115	115	187	187	NA	359	365	365	336	344	372	346	352	360	191	201	201	173	173	175	222	222	NA	154	154	156
2023-PLATE-107_2022-2353_89-Pressure_7500PSI_R1_089	7500 PSI	267	275	275	148	152	164	315	319	339	NA	NA	NA	238	242	246	140	140	NA	192	196	224	115	115	NA	193	195	197	359	359	365	344	352	372	346	346	352	197	197	201	173	173	175	220	220	222	156	156	NA
2023-PLATE-107_2022-2353_90-Pressure_7500PSI_R1_090	7500 PSI	267	279	279	148	152	164	343	343	NA	224	244	249	222	234	234	140	140	144	200	200	208	103	115	115	187	195	197	359	363	365	336	364	372	346	346	NA	191	191	201	173	173	NA	220	222	226	156	168	168
2023-PLATE-107_2022-2353_91-Pressure_7500PSI_R1_091	7500 PSI	267	275	275	148	152	164	343	343	NA	224	244	249	222	234	242	140	140	144	196	200	200	115	115	NA	187	197	197	359	363	363	336	364	364	346	346	360	191	191	201	173	173	NA	220	222	226	154	154	156
2023-PLATE-107_2022-2353_92-Pressure_7500PSI_R1_092	7500 PSI	275	275	283	124	148	164	343	343	NA	NA	NA	NA	NA	NA	NA	NA	NA	NA	188	196	200	103	103	NA	187	187	193	359	363	365	336	344	372	352	360	360	197	197	201	175	175	NA	220	220	222	154	154	168
2023-PLATE-107_2022-2353_93-Pressure_7500PSI_R1_093	7500 PSI	267	275	275	148	152	164	339	339	343	NA	NA	NA	238	242	246	140	140	144	192	196	224	115	115	NA	193	195	197	359	359	NA	344	352	372	346	346	352	191	197	201	173	173	NA	220	220	222	156	156	NA
2023-PLATE-107_2022-2353_94-Pressure_7500PSI_R1_094	7500 PSI	267	275	275	148	152	164	315	319	339	NA	NA	NA	238	242	246	140	140	NA	192	208	224	115	115	NA	195	195	197	359	359	NA	344	352	372	346	352	360	197	197	201	173	173	NA	220	220	222	156	156	168
2023-PLATE-107_2022-2353_95-Pressure_7500PSI_R1_095	7500 PSI	275	275	283	124	148	164	315	339	343	224	244	244	234	238	246	140	140	144	192	196	224	115	115	NA	193	195	197	359	359	365	344	352	372	346	346	352	191	197	197	173	173	175	220	220	222	156	156	NA
2023-PLATE-107_2022-2353_96-Pressure_7500PSI_R1_096	7500 PSI	267	275	275	124	148	164	315	339	343	224	244	244	238	242	246	140	140	NA	192	208	224	103	115	115	193	195	197	359	359	365	344	352	372	346	352	352	197	197	201	173	173	175	220	220	222	156	156	168
2023-PLATE-107_2022-2353_97-Pressure_7500PSI_R1_097	7500 PSI	267	275	275	124	148	164	315	319	339	224	244	244	234	238	246	140	140	NA	196	224	224	103	115	115	193	195	197	359	359	NA	344	352	372	346	352	360	197	197	201	173	173	NA	220	220	222	156	156	NA
2023-PLATE-107_2022-2353_98-Pressure_7500PSI_R1_098	7500 PSI	275	275	283	148	152	164	315	339	343	224	244	244	238	242	246	140	140	NA	192	208	224	115	115	NA	187	193	195	359	359	365	336	344	352	346	352	360	197	197	201	173	173	175	220	220	222	156	156	NA
2023-PLATE-107_2022-2353_99-Pressure_7500PSI_R1_099	7500 PSI	275	275	283	124	148	164	327	343	343	224	224	NA	206	234	238	140	140	144	188	196	200	103	103	115	187	193	193	359	363	363	336	344	372	346	352	352	191	197	197	173	173	175	220	222	222	154	154	156
2023-PLATE-109_2022-2353_157-Pressure_7500PSI_R2_057	7500 PSI	275	275	283	148	152	164	315	319	339	224	244	244	238	242	246	140	140	NA	NA	NA	NA	115	115	NA	NA	NA	NA	359	359	365	344	352	372	346	352	360	197	197	201	173	173	175	220	220	222	156	156	NA
2023-PLATE-109_2022-2353_158-Pressure_7500PSI_R2_058	7500 PSI	267	275	NA	124	148	NA	343	343	NA	224	244	NA	222	234	234	140	140	NA	200	208	NA	115	115	NA	187	197	NA	359	363	NA	336	364	NA	346	360	NA	197	201	NA	173	173	NA	222	226	NA	168	168	NA
2023-PLATE-109_2022-2353_159-Pressure_7500PSI_R2_059	7500 PSI	267	275	279	124	148	164	319	343	343	224	244	249	222	234	234	140	140	144	200	200	208	115	115	NA	187	195	197	359	359	363	336	364	372	346	346	NA	191	191	201	173	173	175	220	222	226	154	156	168
2023-PLATE-109_2022-2353_160-Pressure_7500PSI_R2_060	7500 PSI	275	275	283	124	148	164	319	327	343	NA	NA	NA	NA	NA	NA	140	140	144	188	200	208	103	115	115	187	187	193	359	363	365	336	344	372	346	360	360	191	197	197	173	173	175	222	222	NA	154	154	168
2023-PLATE-109_2022-2353_161-Pressure_7500PSI_R2_061	7500 PSI	275	275	283	124	148	164	315	319	339	NA	NA	NA	NA	NA	NA	NA	NA	NA	192	196	224	115	115	NA	195	195	197	359	359	365	352	352	372	346	346	352	191	197	201	173	173	175	220	220	222	156	156	168
2023-PLATE-109_2022-2353_162-Pressure_7500PSI_R2_062	7500 PSI	267	275	275	124	148	164	319	327	343	224	224	NA	238	238	242	140	140	144	188	200	208	103	115	115	187	193	197	359	365	365	344	372	372	352	360	360	191	197	197	173	173	175	220	220	222	154	154	156
2023-PLATE-109_2022-2353_163-Pressure_7500PSI_R2_063	7500 PSI	267	275	275	124	148	164	319	343	343	224	244	249	222	234	242	140	140	NA	NA	NA	NA	103	115	115	195	197	197	359	363	365	364	372	372	346	346	360	191	197	201	173	173	NA	220	222	226	168	168	NA
2023-PLATE-109_2022-2353_164-Pressure_7500PSI_R2_064	7500 PSI	267	275	275	NA	NA	NA	315	319	339	224	244	244	234	238	246	140	140	144	192	196	224	103	115	115	187	195	195	359	359	365	336	344	352	346	352	360	191	197	201	173	173	NA	220	220	222	156	156	168
2023-PLATE-109_2022-2353_165-Pressure_7500PSI_R2_065	7500 PSI	275	275	283	124	148	164	315	319	339	224	244	244	234	238	246	140	140	NA	192	208	224	103	115	115	193	193	197	359	359	365	344	352	372	346	346	352	197	197	NA	173	173	NA	220	220	222	156	156	168
2023-PLATE-109_2022-2353_166-Pressure_7500PSI_R2_066	7500 PSI	267	275	275	124	148	164	315	339	343	NA	NA	NA	234	238	246	140	140	NA	192	192	196	103	115	115	193	195	197	359	359	365	344	352	372	346	346	352	197	197	201	173	173	175	220	220	222	156	156	NA
2023-PLATE-109_2022-2353_167-Pressure_7500PSI_R2_067	7500 PSI	275	283	NA	124	148	NA	343	343	NA	224	249	NA	234	234	NA	140	144	NA	200	208	NA	103	115	NA	187	197	NA	359	363	NA	336	364	NA	346	346	NA	191	201	NA	173	173	NA	220	222	NA	154	168	NA
2023-PLATE-109_2022-2353_168-Pressure_7500PSI_R2_068	7500 PSI	275	279	283	124	148	164	343	343	NA	224	244	249	222	234	242	140	140	144	200	200	208	115	115	NA	195	197	197	359	363	365	364	372	372	346	346	NA	191	191	201	173	173	NA	220	222	226	154	168	168
2023-PLATE-109_2022-2353_169-Pressure_7500PSI_R2_069	7500 PSI	275	275	283	148	152	164	315	339	343	224	244	244	242	246	246	140	140	NA	192	208	224	115	115	NA	187	193	195	359	359	NA	336	344	352	346	346	352	197	197	NA	173	173	NA	220	220	222	156	156	NA
2023-PLATE-109_2022-2353_170-Pressure_7500PSI_R2_070	7500 PSI	279	279	283	124	148	164	319	343	343	224	244	249	222	234	234	140	140	NA	196	200	200	103	115	115	187	195	197	363	363	365	336	364	372	346	346	360	197	201	201	173	173	175	220	222	226	154	154	168
2023-PLATE-109_2022-2353_171-Pressure_7500PSI_R2_071	7500 PSI	275	275	283	148	152	164	315	319	339	224	244	244	238	242	246	140	140	144	192	196	224	103	115	115	187	193	193	359	359	NA	336	344	352	346	346	352	191	201	201	173	173	NA	220	220	222	156	156	NA
2023-PLATE-109_2022-2353_172-Pressure_7500PSI_R2_072	7500 PSI	275	275	283	124	148	164	315	319	339	NA	NA	NA	234	238	246	140	140	NA	192	208	224	103	115	115	187	193	195	359	359	NA	336	344	352	346	352	360	197	197	201	173	173	NA	220	220	222	156	156	NA
2023-PLATE-109_2022-2353_173-Pressure_7500PSI_R2_073	7500 PSI	267	275	275	124	148	164	315	319	339	224	244	244	238	238	242	140	140	NA	192	196	224	115	115	NA	195	195	197	359	359	365	344	352	372	346	352	360	197	197	NA	173	173	175	220	220	222	156	156	168
2023-PLATE-109_2022-2353_174-Pressure_7500PSI_R2_074	7500 PSI	267	275	275	148	152	164	343	343	NA	224	244	249	222	234	234	140	140	144	200	200	208	115	115	NA	195	197	197	359	363	365	364	372	372	346	346	360	191	191	201	173	173	NA	220	222	226	156	168	168
2023-PLATE-109_2022-2353_175-Pressure_7500PSI_R2_075	7500 PSI	267	279	279	124	148	164	343	343	NA	224	244	249	234	234	242	140	140	NA	200	200	208	103	115	115	195	195	197	359	359	365	364	372	372	346	346	360	191	197	201	173	173	175	220	222	226	154	168	168
2023-PLATE-109_2022-2353_176-Pressure_7500PSI_R2_076	7500 PSI	275	275	279	148	152	164	315	319	339	224	244	244	238	242	246	140	140	NA	192	196	224	115	115	NA	195	195	197	359	359	NA	344	352	372	346	346	352	197	197	201	173	173	175	220	220	222	156	156	168
2023-PLATE-109_2022-2353_177-Pressure_7500PSI_R2_077	7500 PSI	275	275	283	148	152	164	315	319	339	224	244	244	238	242	246	140	140	NA	192	192	208	115	115	NA	193	195	197	359	359	365	344	352	372	346	346	352	197	197	201	173	173	175	220	220	222	156	156	NA
2023-PLATE-109_2022-2353_178-Pressure_7500PSI_R2_078	7500 PSI	267	275	275	124	148	164	315	339	343	224	244	244	234	238	246	140	140	144	192	208	224	115	115	NA	193	195	197	359	359	NA	344	352	372	346	346	352	191	197	197	173	173	NA	220	220	222	156	156	NA
2023-PLATE-109_2022-2353_179-Pressure_7500PSI_R2_079	7500 PSI	279	279	283	148	152	164	343	343	NA	224	244	249	222	234	242	140	140	144	200	200	208	103	115	115	197	197	NA	363	363	365	364	372	372	346	346	360	191	191	201	173	173	NA	220	222	226	154	156	168
2023-PLATE-109_2022-2353_180-Pressure_7500PSI_R2_080	7500 PSI	267	275	275	124	148	164	315	339	343	224	244	244	234	238	246	140	140	144	192	208	224	115	115	NA	187	193	195	359	359	NA	336	344	352	352	352	360	191	201	201	173	173	NA	220	220	222	156	156	168
2023-PLATE-109_2022-2353_181-Pressure_7500PSI_R2_081	7500 PSI	275	275	283	124	148	164	319	327	343	NA	NA	NA	206	234	238	140	140	144	188	196	200	103	115	115	187	187	193	359	363	365	336	344	372	352	360	360	191	197	201	173	175	175	220	222	222	154	154	168
2023-PLATE-109_2022-2353_182-Pressure_7500PSI_R2_082	7500 PSI	267	279	279	124	148	164	319	343	343	224	244	249	222	222	242	140	140	NA	200	200	208	103	115	115	195	195	197	359	359	365	364	372	372	346	346	360	191	197	201	173	173	NA	220	222	226	156	168	168
2023-PLATE-109_2022-2353_183-Pressure_7500PSI_R2_083	7500 PSI	267	279	279	148	152	164	343	343	NA	224	244	249	222	234	242	140	140	144	200	200	208	103	115	115	195	197	197	359	363	365	364	372	372	346	346	NA	191	191	201	173	173	NA	220	222	226	168	168	NA
2023-PLATE-109_2022-2353_184-Pressure_7500PSI_R2_084	7500 PSI	275	279	283	148	152	164	343	343	NA	224	244	249	222	234	234	140	140	144	200	200	208	103	115	115	195	197	197	359	363	365	364	372	372	346	346	360	191	191	201	173	173	175	220	220	222	154	168	168
2023-PLATE-109_2022-2353_185-Pressure_7500PSI_R2_085	7500 PSI	275	279	283	148	152	164	343	343	NA	224	244	249	222	234	242	140	140	144	196	200	200	115	115	NA	187	195	197	359	359	363	336	364	372	346	346	360	191	191	201	173	173	NA	220	222	226	154	168	168
2023-PLATE-109_2022-2353_186-Pressure_7500PSI_R2_086	7500 PSI	275	275	283	124	164	164	319	343	343	224	244	249	222	234	234	140	140	144	200	200	208	103	115	115	187	197	197	363	363	365	336	364	364	346	346	360	191	191	201	173	173	175	220	222	226	154	168	168
2023-PLATE-109_2022-2353_187-Pressure_7500PSI_R2_087	7500 PSI	275	275	283	124	148	164	315	339	343	224	244	244	234	238	246	140	140	144	192	192	196	103	115	115	187	193	195	359	359	365	336	344	352	346	346	352	191	197	201	173	173	175	220	220	222	156	156	168
2023-PLATE-109_2022-2353_188-Pressure_7500PSI_R2_088	7500 PSI	275	279	283	124	148	164	343	343	NA	224	244	249	222	234	234	140	140	NA	196	200	200	115	115	NA	187	195	195	359	359	NA	NA	NA	NA	NA	NA	NA	191	197	201	NA	NA	NA	NA	NA	NA	154	156	168
2023-PLATE-109_2022-2353_189-Pressure_7500PSI_R2_089	7500 PSI	267	275	275	124	148	164	319	343	343	224	244	249	222	234	242	140	140	144	196	200	200	115	115	NA	187	195	197	359	359	363	336	364	372	346	346	360	191	191	201	173	173	NA	220	220	222	154	154	168
2023-PLATE-109_2022-2353_190-Pressure_7500PSI_R2_090	7500 PSI	275	275	283	124	148	164	315	339	343	NA	NA	NA	234	238	246	140	140	144	192	208	224	115	115	NA	187	195	195	359	359	NA	336	344	352	352	352	360	191	197	201	173	173	175	220	220	222	156	156	NA
2023-PLATE-109_2022-2353_191-Pressure_7500PSI_R2_091	7500 PSI	275	279	283	148	152	164	319	343	343	224	244	249	222	234	242	140	140	144	200	200	208	103	115	115	195	197	197	359	363	365	364	372	372	346	346	NA	191	191	201	173	173	175	220	222	226	154	168	168
2023-PLATE-109_2022-2353_192-Pressure_7500PSI_R2_092	7500 PSI	275	275	283	124	148	164	315	319	339	224	244	244	238	242	246	140	140	NA	192	196	224	103	115	115	193	195	197	359	359	NA	344	352	372	346	352	360	197	197	201	173	173	NA	220	220	222	156	156	168
2023-PLATE-109_2022-2353_193-Pressure_7500PSI_R2_093	7500 PSI	NA	NA	NA	NA	NA	NA	NA	NA	NA	NA	NA	NA	NA	NA	NA	NA	NA	NA	NA	NA	NA	NA	NA	NA	NA	NA	NA	NA	NA	NA	NA	NA	NA	NA	NA	NA	NA	NA	NA	NA	NA	NA	NA	NA	NA	NA	NA	NA
2023-PLATE-109_2022-2353_194-Pressure_7500PSI_R2_094	7500 PSI	275	275	283	124	148	164	327	343	343	NA	NA	NA	206	234	238	140	140	NA	200	200	208	103	115	115	187	193	193	359	363	363	336	344	372	346	352	360	197	197	201	173	173	175	222	222	NA	154	154	156
2023-PLATE-109_2022-2353_195-Pressure_7500PSI_R2_095	7500 PSI	275	275	283	124	148	164	319	343	343	224	244	249	222	234	234	140	140	144	200	200	208	115	115	NA	187	195	197	359	359	363	336	364	372	346	346	NA	191	191	201	173	173	175	222	226	226	154	168	168
2023-PLATE-109_2022-2353_196-Pressure_7500PSI_R2_096	7500 PSI	267	275	275	148	152	164	315	319	339	224	244	244	234	238	246	140	140	144	192	192	196	115	115	NA	187	193	195	359	359	NA	336	344	344	346	346	352	191	201	201	173	173	NA	220	220	222	156	156	NA
2023-PLATE-109_2022-2353_197-Pressure_7500PSI_R2_097	7500 PSI	267	275	275	124	148	164	315	339	343	224	244	244	234	238	246	140	140	144	192	192	196	115	115	NA	193	195	197	359	359	365	344	352	372	346	346	352	191	197	201	173	173	NA	220	220	222	156	156	NA
2023-PLATE-109_2022-2353_198-Pressure_7500PSI_R2_098	7500 PSI	275	275	283	124	148	164	315	339	343	224	244	244	238	242	246	140	140	144	192	208	224	103	115	115	187	195	195	359	359	NA	336	344	352	346	346	352	191	197	201	173	173	175	220	220	222	156	156	NA
2023-PLATE-109_2022-2353_199-Pressure_7500PSI_R2_099	7500 PSI	275	275	283	124	148	164	319	343	343	224	244	249	234	234	NA	140	140	144	196	200	200	115	115	NA	187	197	197	359	359	363	336	364	364	346	346	NA	191	201	201	173	173	NA	220	222	226	154	156	168
2023-PLATE-109_2022-2353_200-Pressure_7500PSI_R2_100	7500 PSI	267	275	275	124	148	164	315	319	339	224	244	244	234	238	246	140	140	NA	192	196	224	103	115	115	187	195	195	359	359	NA	336	344	352	346	346	352	197	197	NA	173	173	NA	220	220	222	156	156	NA
2023-PLATE-109_2022-2354_1-Pressure_8500PSI_R1_001	8500 PSI	267	275	275	148	152	164	319	343	343	224	244	249	222	234	242	140	140	NA	200	200	208	103	115	115	187	195	197	359	359	363	336	364	372	346	346	360	191	197	201	173	173	175	220	222	226	154	168	168
2023-PLATE-109_2022-2354_10-Pressure_8500PSI_R1_010	8500 PSI	275	275	283	124	148	164	319	343	343	224	244	249	222	234	234	140	140	144	200	200	208	103	115	115	187	195	197	359	359	363	336	364	372	346	346	NA	191	191	201	173	173	175	220	222	226	154	156	168
2023-PLATE-109_2022-2354_11-Pressure_8500PSI_R1_011	8500 PSI	267	275	275	124	148	164	315	339	343	224	244	244	238	242	246	140	140	144	192	208	224	115	115	NA	193	195	197	359	359	365	344	352	372	346	352	360	191	197	201	173	173	NA	220	220	222	156	156	168
2023-PLATE-109_2022-2354_12-Pressure_8500PSI_R1_012	8500 PSI	279	279	283	148	152	164	319	343	343	224	244	249	222	234	234	140	140	144	196	200	200	103	115	115	195	197	197	359	363	365	364	372	372	346	346	360	191	191	201	173	173	175	220	222	226	154	168	168
2023-PLATE-109_2022-2354_13-Pressure_8500PSI_R1_013	8500 PSI	275	275	283	124	148	164	327	327	343	224	224	NA	206	238	242	140	140	NA	188	200	208	103	115	115	187	187	193	359	363	363	336	344	372	346	352	352	197	197	201	173	173	NA	220	222	222	154	154	168
2023-PLATE-109_2022-2354_14-Pressure_8500PSI_R1_014	8500 PSI	267	275	275	124	148	164	315	339	343	224	244	244	238	242	246	140	140	NA	192	208	224	115	115	NA	195	195	197	359	359	365	352	352	372	346	346	352	197	201	201	173	173	NA	220	220	222	156	156	NA
2023-PLATE-109_2022-2354_15-Pressure_8500PSI_R1_015	8500 PSI	267	275	275	148	152	164	327	327	343	224	224	NA	206	234	238	140	140	144	188	196	200	103	103	115	187	193	197	359	363	365	344	372	372	352	360	360	191	197	201	175	175	NA	220	220	222	154	154	156
2023-PLATE-109_2022-2354_16-Pressure_8500PSI_R1_016	8500 PSI	267	275	275	148	152	164	315	339	343	224	244	244	238	242	246	140	140	144	192	208	224	115	115	NA	195	195	197	359	359	NA	344	352	372	346	346	352	191	197	201	173	173	NA	220	220	222	156	156	168
2023-PLATE-109_2022-2354_17-Pressure_8500PSI_R1_017	8500 PSI	267	275	275	124	148	164	319	327	327	224	224	NA	206	234	238	140	140	144	188	200	208	103	115	115	187	193	197	365	365	NA	344	372	372	352	360	360	191	201	201	173	175	175	220	220	222	154	154	168
2023-PLATE-109_2022-2354_18-Pressure_8500PSI_R1_018	8500 PSI	275	275	283	124	148	164	327	343	343	224	224	NA	206	238	242	140	140	NA	188	188	196	103	115	115	187	187	193	359	363	365	336	344	372	346	360	360	197	197	201	173	173	175	222	222	NA	154	154	168
2023-PLATE-109_2022-2354_19-Pressure_8500PSI_R1_019	8500 PSI	267	275	275	124	148	164	319	327	343	224	224	NA	206	234	238	140	140	144	188	196	200	103	115	115	187	193	193	359	363	363	336	344	372	346	352	360	191	197	201	175	175	NA	220	220	222	154	154	168
2023-PLATE-109_2022-2354_2-Pressure_8500PSI_R1_002	8500 PSI	267	275	275	148	152	164	319	343	343	224	244	249	222	234	242	140	140	144	200	200	208	115	115	NA	187	195	197	359	359	363	336	364	372	346	346	NA	191	191	201	173	173	NA	220	222	226	154	156	168
2023-PLATE-109_2022-2354_20-Pressure_8500PSI_R1_020	8500 PSI	275	275	283	124	148	164	315	339	343	224	244	244	234	238	246	140	140	NA	192	196	224	103	115	115	193	195	197	359	359	365	344	352	372	346	346	352	197	197	201	173	173	175	220	220	222	156	156	NA
2023-PLATE-109_2022-2354_21-Pressure_8500PSI_R1_021	8500 PSI	267	275	279	148	152	164	319	343	343	224	244	249	222	234	234	140	140	NA	200	200	208	115	115	NA	187	195	197	359	359	363	336	364	372	346	346	NA	197	201	201	173	173	175	220	222	226	154	156	168
2023-PLATE-109_2022-2354_22-Pressure_8500PSI_R1_022	8500 PSI	267	275	275	124	148	164	319	343	343	224	244	249	222	234	234	140	140	NA	200	200	208	115	115	NA	187	195	197	359	359	363	336	364	372	346	346	360	191	197	201	173	173	175	220	222	226	154	156	168
2023-PLATE-109_2022-2354_23-Pressure_8500PSI_R1_023	8500 PSI	275	275	283	148	152	164	319	327	343	NA	NA	NA	206	238	242	140	140	NA	188	200	208	103	103	NA	187	193	197	359	363	365	344	372	372	346	352	360	197	197	201	173	173	NA	220	220	222	154	154	168
2023-PLATE-109_2022-2354_24-Pressure_8500PSI_R1_024	8500 PSI	275	275	283	148	152	164	315	339	343	224	244	244	238	242	246	140	140	NA	192	208	224	103	115	115	195	195	197	359	359	365	344	352	372	346	352	360	197	201	201	173	173	NA	220	220	222	156	156	168
2023-PLATE-109_2022-2354_25-Pressure_8500PSI_R1_025	8500 PSI	267	275	275	124	148	164	315	319	339	224	244	244	234	238	246	140	140	NA	192	196	224	115	115	NA	193	195	197	359	359	365	344	352	372	346	346	352	197	197	201	173	173	NA	220	220	222	156	156	168
2023-PLATE-109_2022-2354_26-Pressure_8500PSI_R1_026	8500 PSI	267	275	275	124	148	164	315	319	339	224	244	244	234	238	246	140	140	NA	196	224	224	103	115	115	195	195	197	359	359	365	344	352	372	346	352	360	197	197	NA	173	173	175	220	220	222	156	156	NA
2023-PLATE-109_2022-2354_27-Pressure_8500PSI_R1_027	8500 PSI	267	275	275	124	148	164	319	327	343	224	224	NA	206	238	242	140	140	144	188	200	208	103	103	115	187	187	197	365	365	NA	344	372	372	346	352	360	191	197	201	175	175	NA	220	222	222	154	154	156
2023-PLATE-109_2022-2354_28-Pressure_8500PSI_R1_028	8500 PSI	267	275	275	124	148	164	327	343	343	NA	NA	NA	206	206	242	140	140	NA	188	200	208	103	115	115	187	187	193	359	363	365	336	344	372	352	360	360	197	197	201	173	173	175	220	222	222	154	154	168
2023-PLATE-109_2022-2354_29-Pressure_8500PSI_R1_029	8500 PSI	267	275	275	124	148	164	315	339	343	224	244	244	238	242	246	140	140	NA	192	196	224	103	115	115	193	195	197	359	359	365	344	352	372	346	346	352	197	197	201	173	173	NA	220	220	222	156	156	NA
2023-PLATE-109_2022-2354_3-Pressure_8500PSI_R1_003	8500 PSI	275	275	283	148	152	164	315	319	339	224	244	244	238	242	246	140	140	NA	192	196	224	103	115	115	187	193	195	359	359	NA	336	344	352	346	352	360	197	197	201	173	173	NA	220	220	222	156	156	168
2023-PLATE-109_2022-2354_30-Pressure_8500PSI_R1_030	8500 PSI	267	275	275	148	152	164	319	343	343	NA	NA	NA	206	234	238	140	140	NA	188	200	208	103	103	115	187	187	193	359	363	365	336	344	372	352	360	360	197	201	201	175	175	NA	220	222	222	154	154	156
2023-PLATE-109_2022-2354_31-Pressure_8500PSI_R1_031	8500 PSI	267	279	279	124	148	164	319	343	343	224	244	249	222	234	242	140	140	144	196	200	200	115	115	NA	195	197	197	359	363	365	364	372	372	346	346	360	191	191	201	173	173	175	220	222	226	154	156	168
2023-PLATE-109_2022-2354_32-Pressure_8500PSI_R1_032	8500 PSI	275	275	283	148	152	164	319	327	343	224	224	NA	206	238	242	140	140	NA	196	200	200	103	115	115	187	187	193	359	363	363	336	344	372	352	360	360	197	197	201	173	175	175	222	222	NA	154	154	168
2023-PLATE-109_2022-2354_33-Pressure_8500PSI_R1_033	8500 PSI	267	275	275	148	152	164	327	327	343	224	224	NA	206	234	238	140	140	144	188	196	200	103	103	115	187	187	193	359	363	365	336	344	372	346	360	360	191	197	201	175	175	NA	220	222	222	154	154	168
2023-PLATE-109_2022-2354_34-Pressure_8500PSI_R1_034	8500 PSI	267	275	275	124	148	164	327	343	343	224	224	NA	206	206	234	140	140	144	188	196	200	115	115	NA	187	193	197	365	365	NA	344	372	372	352	360	360	191	197	197	173	173	175	220	222	222	154	154	156
2023-PLATE-109_2022-2354_35-Pressure_8500PSI_R1_035	8500 PSI	267	275	275	148	152	164	327	343	343	NA	NA	NA	238	238	242	140	140	NA	188	188	196	103	103	115	187	193	197	359	363	365	344	372	372	346	352	360	197	197	201	175	175	NA	220	222	222	154	154	156
2023-PLATE-109_2022-2354_36-Pressure_8500PSI_R1_036	8500 PSI	267	275	275	148	152	164	319	339	339	224	244	244	234	238	246	140	140	144	192	208	224	115	115	NA	195	195	197	359	359	365	344	352	372	352	352	360	191	197	201	173	173	175	220	220	222	156	156	168
2023-PLATE-109_2022-2354_37-Pressure_8500PSI_R1_037	8500 PSI	267	275	275	148	152	164	327	343	343	NA	NA	NA	206	238	242	140	140	144	188	200	208	103	115	115	187	193	197	359	363	365	344	372	372	346	352	360	191	197	201	173	173	NA	220	222	222	154	154	168
2023-PLATE-109_2022-2354_38-Pressure_8500PSI_R1_038	8500 PSI	267	275	275	124	148	164	315	319	339	224	244	244	234	238	246	140	140	NA	192	208	224	103	115	115	195	195	197	359	359	NA	344	352	372	346	352	360	197	201	201	173	173	NA	220	220	222	156	156	NA
2023-PLATE-109_2022-2354_39-Pressure_8500PSI_R1_039	8500 PSI	275	275	283	124	148	148	315	339	343	224	244	244	238	242	246	140	140	144	192	208	224	103	115	115	193	195	197	359	359	365	344	352	372	346	346	352	191	197	197	173	173	175	220	220	222	156	156	NA
2023-PLATE-109_2022-2354_4-Pressure_8500PSI_R1_004	8500 PSI	279	279	283	148	152	164	319	343	343	224	244	249	222	234	242	140	140	144	200	200	208	103	115	115	187	195	197	359	363	363	336	364	372	346	346	360	191	191	201	173	173	175	220	220	222	154	156	168
2023-PLATE-109_2022-2354_40-Pressure_8500PSI_R1_040	8500 PSI	275	275	287	124	148	164	319	343	343	224	244	249	222	234	242	140	140	144	200	200	208	115	115	NA	187	195	197	359	359	363	336	364	372	346	346	NA	191	191	201	173	173	NA	220	222	226	154	156	168
2023-PLATE-109_2022-2354_41-Pressure_8500PSI_R1_041	8500 PSI	279	279	283	124	148	164	343	343	NA	224	244	249	222	234	242	140	140	NA	196	200	200	115	115	NA	187	195	195	359	359	365	336	364	372	346	346	NA	191	191	197	173	173	NA	220	222	226	154	156	168
2023-PLATE-109_2022-2354_42-Pressure_8500PSI_R1_042	8500 PSI	267	279	279	148	152	164	319	343	343	224	244	249	222	234	242	140	140	144	200	200	208	103	115	115	187	197	197	359	363	363	336	364	372	346	346	NA	191	201	201	173	173	NA	220	222	226	154	154	156
2023-PLATE-109_2022-2354_43-Pressure_8500PSI_R1_043	8500 PSI	267	275	275	124	148	164	315	319	339	224	244	244	238	242	246	140	140	144	192	208	224	115	115	NA	187	193	195	359	359	NA	336	344	352	346	346	360	191	197	197	173	173	NA	220	220	222	156	156	NA
2023-PLATE-109_2022-2354_44-Pressure_8500PSI_R1_044	8500 PSI	275	275	283	124	148	164	327	343	343	224	224	NA	206	238	242	140	140	144	188	196	200	103	115	115	193	193	197	363	363	365	344	372	372	346	360	360	191	197	201	173	173	NA	220	222	222	154	154	156
2023-PLATE-109_2022-2354_45-Pressure_8500PSI_R1_045	8500 PSI	275	275	283	148	152	164	319	343	343	NA	NA	NA	206	234	238	140	140	NA	188	200	208	103	115	115	187	187	197	359	365	365	344	372	372	352	360	360	197	197	201	173	175	175	220	222	222	154	154	156
2023-PLATE-109_2022-2354_46-Pressure_8500PSI_R1_046	8500 PSI	275	275	283	124	148	NA	327	343	343	224	224	NA	206	234	238	140	140	NA	196	200	200	103	103	115	187	187	197	365	365	NA	344	372	372	352	360	360	197	197	NA	175	175	NA	220	222	222	154	154	156
2023-PLATE-109_2022-2354_47-Pressure_8500PSI_R1_047	8500 PSI	275	275	283	148	152	164	327	343	343	224	224	NA	206	234	238	140	140	144	188	200	208	103	103	115	187	187	193	359	363	365	336	344	372	352	360	360	191	197	201	175	175	NA	222	222	NA	154	154	168
2023-PLATE-109_2022-2354_48-Pressure_8500PSI_R1_048	8500 PSI	275	275	283	148	152	164	315	319	339	224	244	244	234	238	246	140	140	NA	192	196	224	103	115	115	193	195	197	359	359	NA	344	352	372	346	352	360	197	197	201	173	173	175	220	220	222	156	156	NA
2023-PLATE-109_2022-2354_49-Pressure_8500PSI_R1_049	8500 PSI	275	275	283	148	152	164	315	339	343	224	244	244	238	242	246	140	140	NA	192	208	224	103	115	115	193	195	197	359	359	365	344	352	372	346	346	352	197	197	201	173	173	NA	220	220	222	156	156	NA
2023-PLATE-109_2022-2354_5-Pressure_8500PSI_R1_005	8500 PSI	275	279	283	148	152	164	343	343	NA	224	244	249	222	234	234	140	140	144	200	200	208	115	115	NA	187	195	197	359	363	365	336	364	372	346	346	NA	191	201	201	173	173	NA	220	222	226	154	154	156
2023-PLATE-109_2022-2354_50-Pressure_8500PSI_R1_050	8500 PSI	267	275	275	148	152	164	315	319	339	224	244	244	238	242	246	140	140	NA	192	196	224	103	115	115	193	195	197	359	359	NA	344	352	372	346	346	352	197	197	201	173	173	NA	220	220	222	156	156	168
2023-PLATE-109_2022-2354_6-Pressure_8500PSI_R1_006	8500 PSI	275	275	283	124	148	164	327	343	343	NA	NA	NA	206	238	242	140	140	NA	188	196	200	103	115	115	187	193	193	359	363	363	336	344	372	352	360	360	197	197	201	175	175	NA	220	220	222	154	154	168
2023-PLATE-109_2022-2354_7-Pressure_8500PSI_R1_007	8500 PSI	275	275	283	148	152	164	327	343	343	224	224	NA	238	238	242	140	140	144	196	200	200	103	115	115	187	193	193	359	363	363	336	344	372	346	352	360	191	197	197	175	175	NA	222	222	NA	154	154	156
2023-PLATE-109_2022-2354_8-Pressure_8500PSI_R1_008	8500 PSI	267	279	279	148	152	164	343	343	NA	224	244	249	222	234	242	140	140	NA	196	200	200	103	115	115	195	197	197	359	363	365	364	372	372	346	346	360	191	197	201	173	173	175	220	222	226	154	156	168
2023-PLATE-109_2022-2354_9-Pressure_8500PSI_R1_009	8500 PSI	267	275	279	124	148	164	343	343	NA	224	244	249	222	234	234	140	140	144	200	200	208	103	115	115	195	197	197	359	363	365	364	372	372	346	346	360	191	191	201	173	173	NA	220	222	226	154	168	168
2023-PLATE-110_2022-2354_100-Pressure_8500PSI_R1_100	8500 PSI	275	275	283	NA	NA	NA	343	343	NA	224	244	249	NA	NA	NA	NA	NA	NA	200	200	208	115	115	NA	187	197	197	359	363	363	336	364	364	346	346	360	191	191	201	173	173	175	220	220	222	154	154	156
2023-PLATE-110_2022-2354_101-Pressure_8500PSI_R2_001	8500 PSI	267	275	275	NA	NA	NA	343	343	NA	224	224	NA	NA	NA	NA	NA	NA	NA	188	200	208	103	103	115	187	187	193	359	363	365	336	344	372	346	352	360	191	197	201	173	173	NA	220	222	222	154	154	168
2023-PLATE-110_2022-2354_102-Pressure_8500PSI_R2_002	8500 PSI	267	275	275	NA	NA	NA	315	319	339	224	244	244	NA	NA	NA	140	140	NA	192	208	224	115	115	NA	187	193	195	359	359	NA	336	344	352	346	346	352	197	197	NA	173	173	175	220	220	222	156	156	NA
2023-PLATE-110_2022-2354_103-Pressure_8500PSI_R2_003	8500 PSI	275	275	283	NA	NA	NA	319	327	343	224	224	NA	NA	NA	NA	140	140	144	188	200	208	103	103	115	187	193	197	363	365	365	344	372	372	352	352	360	191	197	201	175	175	NA	220	222	222	154	154	168
2023-PLATE-110_2022-2354_104-Pressure_8500PSI_R2_004	8500 PSI	267	275	275	148	152	164	315	339	343	224	244	244	NA	NA	NA	NA	NA	NA	192	208	224	115	115	NA	193	195	197	359	359	NA	344	352	372	346	346	352	191	197	201	173	173	175	220	220	222	156	156	NA
2023-PLATE-110_2022-2354_105-Pressure_8500PSI_R2_005	8500 PSI	275	275	283	NA	NA	NA	315	319	339	224	244	244	NA	NA	NA	140	140	144	192	196	224	115	115	NA	193	195	197	359	359	365	344	352	372	346	346	352	191	197	201	173	173	175	220	220	222	156	156	168
2023-PLATE-110_2022-2354_106-Pressure_8500PSI_R2_006	8500 PSI	275	275	283	124	148	164	327	343	343	224	224	NA	NA	NA	NA	140	140	NA	188	200	208	103	103	115	187	193	197	359	363	365	344	372	372	360	360	NA	197	197	201	175	175	NA	220	222	222	154	154	156
2023-PLATE-110_2022-2354_107-Pressure_8500PSI_R2_007	8500 PSI	275	275	283	NA	NA	NA	315	319	339	224	244	244	NA	NA	NA	140	140	NA	192	208	224	103	115	115	187	193	195	359	359	365	336	344	352	346	352	360	197	197	201	173	173	175	220	220	222	156	156	168
2023-PLATE-110_2022-2354_108-Pressure_8500PSI_R2_008	8500 PSI	275	275	283	NA	NA	NA	315	319	339	224	244	244	NA	NA	NA	140	140	144	192	208	224	103	115	115	193	195	197	359	359	365	344	352	372	346	346	352	191	197	201	173	173	175	220	220	222	156	156	168
2023-PLATE-110_2022-2354_109-Pressure_8500PSI_R2_009	8500 PSI	275	275	283	148	152	164	315	319	339	224	244	244	NA	NA	NA	140	140	144	192	208	224	103	115	115	187	193	195	359	359	NA	336	344	352	346	346	352	191	197	201	173	173	175	220	220	222	156	156	NA
2023-PLATE-110_2022-2354_110-Pressure_8500PSI_R2_010	8500 PSI	267	275	275	NA	NA	NA	343	343	NA	224	244	249	NA	NA	NA	140	140	144	200	200	208	115	115	NA	187	195	197	359	363	365	336	364	372	346	346	360	191	191	201	173	173	NA	220	222	226	154	156	168
2023-PLATE-110_2022-2354_111-Pressure_8500PSI_R2_011	8500 PSI	275	275	283	NA	NA	NA	343	343	NA	224	244	249	NA	NA	NA	140	140	144	200	200	208	103	115	115	187	195	197	359	359	363	336	364	372	346	346	360	191	191	201	173	173	NA	222	226	226	154	168	168
2023-PLATE-110_2022-2354_112-Pressure_8500PSI_R2_012	8500 PSI	275	275	283	148	152	164	327	343	343	224	224	NA	NA	NA	NA	140	140	144	188	188	196	103	103	115	187	187	NA	359	365	365	336	344	372	346	352	360	191	197	201	173	173	NA	222	222	NA	154	154	168
2023-PLATE-110_2022-2354_113-Pressure_8500PSI_R2_013	8500 PSI	275	275	283	148	148	152	327	343	343	224	224	NA	NA	NA	NA	140	140	NA	188	200	208	103	115	115	187	187	193	363	363	365	336	344	372	346	360	360	197	197	201	173	173	175	220	222	222	154	154	168
2023-PLATE-110_2022-2354_114-Pressure_8500PSI_R2_014	8500 PSI	275	275	283	NA	NA	NA	315	339	343	224	244	244	NA	NA	NA	140	140	NA	192	208	224	103	115	115	193	195	197	359	359	NA	344	352	372	346	352	360	197	197	201	173	173	175	220	220	222	156	156	NA
2023-PLATE-110_2022-2354_115-Pressure_8500PSI_R2_015	8500 PSI	275	279	283	NA	NA	NA	319	343	343	224	244	249	NA	NA	NA	140	140	144	196	200	200	103	115	115	195	197	197	359	363	365	364	372	372	346	346	NA	191	201	201	173	173	NA	220	222	226	156	168	168
2023-PLATE-110_2022-2354_116-Pressure_8500PSI_R2_016	8500 PSI	275	275	283	NA	NA	NA	319	327	343	224	224	NA	NA	NA	NA	140	140	144	188	196	200	103	103	115	193	193	197	359	363	365	344	372	372	352	360	360	191	197	201	173	173	175	220	222	222	154	154	168
2023-PLATE-110_2022-2354_117-Pressure_8500PSI_R2_017	8500 PSI	275	275	283	NA	NA	NA	323	327	343	224	224	NA	NA	NA	NA	140	140	NA	196	200	200	103	103	115	187	193	193	363	363	365	336	344	344	352	352	360	197	197	201	173	173	175	220	222	222	154	154	156
2023-PLATE-110_2022-2354_118-Pressure_8500PSI_R2_018	8500 PSI	267	275	275	NA	NA	NA	327	343	343	224	224	NA	NA	NA	NA	140	140	144	196	200	200	103	115	115	187	187	193	363	363	365	336	344	372	346	352	352	191	197	197	173	173	175	222	222	NA	154	154	168
2023-PLATE-110_2022-2354_119-Pressure_8500PSI_R2_019	8500 PSI	279	279	283	NA	NA	NA	319	343	343	224	244	249	NA	NA	NA	140	140	144	196	200	200	115	115	NA	187	195	195	359	359	NA	336	364	372	346	346	NA	191	191	201	173	173	NA	220	222	226	154	168	168
2023-PLATE-110_2022-2354_120-Pressure_8500PSI_R2_020	8500 PSI	267	275	275	NA	NA	NA	343	343	NA	224	244	249	NA	NA	NA	140	140	144	200	200	208	115	115	NA	187	195	197	359	359	363	336	364	372	346	346	360	191	191	201	173	173	175	220	222	226	154	168	168
2023-PLATE-110_2022-2354_121-Pressure_8500PSI_R2_021	8500 PSI	267	275	275	NA	NA	NA	319	327	343	224	224	NA	NA	NA	NA	140	140	144	196	200	200	103	115	115	187	187	193	359	363	365	336	344	372	346	352	360	191	197	201	173	173	NA	222	222	NA	154	154	156
2023-PLATE-110_2022-2354_122-Pressure_8500PSI_R2_022	8500 PSI	267	275	275	NA	NA	NA	319	343	343	224	244	249	NA	NA	NA	140	140	144	200	200	208	103	115	115	187	195	197	359	359	363	336	364	372	346	346	NA	191	191	201	173	173	NA	220	222	226	168	168	NA
2023-PLATE-110_2022-2354_123-Pressure_8500PSI_R2_023	8500 PSI	275	279	283	NA	NA	NA	319	343	343	224	244	249	NA	NA	NA	140	140	144	200	200	208	103	115	115	195	197	197	NA	NA	NA	364	372	372	346	346	360	NA	NA	NA	173	173	NA	220	222	226	NA	NA	NA
2023-PLATE-110_2022-2354_124-Pressure_8500PSI_R2_024	8500 PSI	267	275	275	NA	NA	NA	315	319	339	224	244	244	NA	NA	NA	NA	NA	NA	192	208	224	103	115	115	187	193	195	359	359	NA	336	344	352	346	346	352	191	197	201	173	173	175	220	220	222	156	156	NA
2023-PLATE-110_2022-2354_125-Pressure_8500PSI_R2_025	8500 PSI	267	275	275	148	152	164	315	319	339	224	244	244	NA	NA	NA	140	140	NA	192	208	224	103	115	115	187	195	195	359	359	NA	336	352	352	346	346	352	197	201	201	173	173	175	220	220	222	156	156	168
2023-PLATE-110_2022-2354_126-Pressure_8500PSI_R2_026	8500 PSI	267	275	275	NA	NA	NA	315	319	339	224	244	244	NA	NA	NA	140	140	144	192	196	224	115	115	NA	193	195	197	359	359	NA	344	352	372	346	346	352	191	197	201	173	173	NA	220	220	222	156	156	NA
2023-PLATE-110_2022-2354_127-Pressure_8500PSI_R2_027	8500 PSI	267	275	275	124	148	164	315	339	343	224	244	244	NA	NA	NA	140	140	NA	192	192	208	103	115	115	193	195	197	359	359	NA	344	352	372	346	352	360	197	197	201	173	173	175	220	220	222	156	156	168
2023-PLATE-110_2022-2354_128-Pressure_8500PSI_R2_028	8500 PSI	267	275	275	NA	NA	NA	327	343	343	224	224	NA	NA	NA	NA	140	140	NA	188	196	200	103	103	115	187	187	197	365	365	NA	344	372	372	352	360	360	197	197	201	173	173	175	220	220	222	154	154	168
2023-PLATE-110_2022-2354_129-Pressure_8500PSI_R2_029	8500 PSI	275	275	283	NA	NA	NA	319	327	343	224	224	NA	NA	NA	NA	140	140	144	188	188	196	103	103	115	187	187	193	359	363	365	336	344	372	352	360	360	191	197	201	175	175	NA	220	222	222	154	154	168
2023-PLATE-110_2022-2354_130-Pressure_8500PSI_R2_030	8500 PSI	275	275	283	NA	NA	NA	315	339	343	224	244	244	NA	NA	NA	140	140	144	192	192	208	115	115	NA	187	193	195	359	359	NA	336	344	352	346	346	352	NA	NA	NA	173	173	NA	220	220	222	156	156	168
2023-PLATE-110_2022-2354_131-Pressure_8500PSI_R2_031	8500 PSI	275	275	283	NA	NA	NA	315	319	339	224	244	244	NA	NA	NA	140	140	NA	192	196	224	115	115	NA	193	195	197	359	359	365	344	352	372	346	346	352	197	197	NA	173	173	175	220	220	222	156	156	NA
2023-PLATE-110_2022-2354_132-Pressure_8500PSI_R2_032	8500 PSI	275	275	283	NA	NA	NA	343	343	NA	224	224	NA	NA	NA	NA	140	140	NA	188	196	200	103	115	115	187	193	197	363	365	365	344	372	372	352	360	360	197	197	201	173	173	175	222	222	NA	154	154	156
2023-PLATE-110_2022-2354_133-Pressure_8500PSI_R2_033	8500 PSI	267	275	275	NA	NA	NA	343	343	NA	224	224	NA	NA	NA	NA	140	140	144	188	200	208	103	103	NA	193	193	197	363	363	365	344	372	372	346	352	352	191	197	201	173	173	175	220	222	222	154	154	156
2023-PLATE-110_2022-2354_134-Pressure_8500PSI_R2_034	8500 PSI	275	275	283	NA	NA	NA	319	343	343	224	244	249	NA	NA	NA	140	140	NA	200	200	208	103	115	115	187	197	197	359	363	363	336	364	372	346	346	360	191	197	201	173	173	175	220	222	226	154	156	168
2023-PLATE-110_2022-2354_135-Pressure_8500PSI_R2_035	8500 PSI	267	275	275	NA	NA	NA	327	343	343	224	224	NA	NA	NA	NA	140	140	NA	188	200	208	103	115	115	187	187	197	365	365	NA	344	372	372	360	360	NA	197	197	201	173	175	175	220	220	222	154	154	156
2023-PLATE-110_2022-2354_136-Pressure_8500PSI_R2_036	8500 PSI	275	275	283	NA	NA	NA	319	343	343	224	244	249	NA	NA	NA	140	140	NA	200	200	208	103	115	115	187	195	197	359	359	363	336	364	372	346	346	360	191	197	201	173	173	NA	220	222	226	154	156	168
2023-PLATE-110_2022-2354_137-Pressure_8500PSI_R2_037	8500 PSI	267	275	275	NA	NA	NA	327	343	343	224	224	NA	NA	NA	NA	140	140	144	188	200	208	103	103	115	187	193	197	359	363	365	344	372	372	346	360	360	191	197	201	173	175	175	222	222	NA	154	154	156
2023-PLATE-110_2022-2354_138-Pressure_8500PSI_R2_038	8500 PSI	267	275	275	NA	NA	NA	319	327	343	224	224	NA	NA	NA	NA	140	140	NA	188	196	200	103	115	115	187	193	193	359	363	363	336	344	372	352	360	360	197	201	201	173	175	175	220	222	222	154	154	156
2023-PLATE-110_2022-2354_139-Pressure_8500PSI_R2_039	8500 PSI	267	275	275	NA	NA	NA	315	339	343	224	244	244	NA	NA	NA	140	140	144	192	208	224	103	115	115	187	193	195	359	359	NA	336	344	352	346	352	360	191	197	201	173	173	NA	220	220	222	156	156	168
2023-PLATE-110_2022-2354_140-Pressure_8500PSI_R2_040	8500 PSI	267	275	275	NA	NA	NA	327	343	343	224	224	NA	NA	NA	NA	140	140	NA	188	200	208	103	115	115	187	187	193	359	363	365	336	344	372	346	352	360	197	197	201	175	175	NA	220	222	222	154	154	168
2023-PLATE-110_2022-2354_141-Pressure_8500PSI_R2_041	8500 PSI	275	275	283	NA	NA	NA	327	343	343	224	224	NA	NA	NA	NA	140	140	144	188	196	200	103	115	115	187	187	193	359	363	365	336	344	372	352	360	360	191	197	201	173	173	175	220	222	222	154	154	168
2023-PLATE-110_2022-2354_142-Pressure_8500PSI_R2_042	8500 PSI	267	275	275	NA	NA	NA	315	319	339	224	244	244	NA	NA	NA	NA	NA	NA	192	196	224	115	115	NA	187	193	195	359	359	NA	336	344	352	346	346	352	191	197	201	173	173	NA	220	220	222	156	156	168
2023-PLATE-110_2022-2354_143-Pressure_8500PSI_R2_043	8500 PSI	275	279	283	NA	NA	NA	319	343	343	224	244	249	NA	NA	NA	140	140	NA	196	200	200	103	115	115	187	195	197	359	359	363	336	364	372	346	346	NA	191	197	201	173	173	175	220	222	226	154	168	168
2023-PLATE-110_2022-2354_144-Pressure_8500PSI_R2_044	8500 PSI	267	275	279	124	164	164	319	343	343	224	244	249	NA	NA	NA	NA	NA	NA	200	200	208	103	115	115	187	195	197	359	359	363	336	364	372	346	346	360	191	191	201	173	173	NA	220	222	226	154	168	168
2023-PLATE-110_2022-2354_51-Pressure_8500PSI_R1_051	8500 PSI	275	275	283	NA	NA	NA	327	343	343	224	224	NA	NA	NA	NA	140	140	NA	188	196	200	103	103	115	187	187	193	363	365	365	336	344	372	346	352	360	197	197	201	173	175	175	220	222	222	154	154	156
2023-PLATE-110_2022-2354_52-Pressure_8500PSI_R1_052	8500 PSI	267	275	275	124	148	164	315	319	339	224	244	244	NA	NA	NA	140	140	144	208	224	224	103	115	115	187	193	195	359	359	NA	336	344	352	346	352	352	191	201	201	173	173	NA	220	220	222	156	156	168
2023-PLATE-110_2022-2354_53-Pressure_8500PSI_R1_053	8500 PSI	279	279	283	NA	NA	NA	319	343	343	224	244	249	NA	NA	NA	140	140	NA	200	200	208	103	115	115	187	195	197	359	359	363	336	364	372	346	346	NA	191	197	201	173	173	175	220	222	226	154	154	168
2023-PLATE-110_2022-2354_54-Pressure_8500PSI_R1_054	8500 PSI	275	275	283	NA	NA	NA	315	319	339	224	244	244	NA	NA	NA	NA	NA	NA	192	208	224	115	115	NA	187	193	195	359	359	365	336	344	352	346	352	360	191	197	201	173	173	175	220	220	222	156	156	168
2023-PLATE-110_2022-2354_55-Pressure_8500PSI_R1_055	8500 PSI	267	275	275	NA	NA	NA	319	327	343	224	224	NA	NA	NA	NA	NA	NA	NA	188	196	200	103	115	115	187	187	197	365	365	NA	344	372	372	346	352	360	191	197	201	173	173	NA	220	222	222	154	154	156
2023-PLATE-110_2022-2354_56-Pressure_8500PSI_R1_056	8500 PSI	267	275	275	124	148	164	315	319	339	224	244	244	NA	NA	NA	NA	NA	NA	192	208	224	115	115	NA	187	193	195	359	359	NA	336	344	352	346	346	360	191	197	201	173	173	175	220	220	222	156	156	NA
2023-PLATE-110_2022-2354_57-Pressure_8500PSI_R1_057	8500 PSI	267	279	279	NA	NA	NA	343	343	NA	224	244	249	NA	NA	NA	140	140	144	200	200	208	115	115	NA	195	197	197	359	363	365	364	372	372	346	346	NA	191	191	201	173	173	NA	220	222	226	154	168	168
2023-PLATE-110_2022-2354_58-Pressure_8500PSI_R1_058	8500 PSI	275	275	283	NA	NA	NA	319	343	343	224	244	249	NA	NA	NA	NA	NA	NA	196	200	200	115	115	NA	195	197	197	359	363	365	364	372	372	346	346	360	191	191	201	173	173	NA	220	222	226	154	168	168
2023-PLATE-110_2022-2354_59-Pressure_8500PSI_R1_059	8500 PSI	279	279	283	NA	NA	NA	343	343	NA	224	244	249	NA	NA	NA	140	140	144	196	200	200	103	115	115	187	195	197	359	359	363	336	364	372	346	346	NA	191	191	201	173	173	175	220	222	226	154	168	168
2023-PLATE-110_2022-2354_60-Pressure_8500PSI_R1_060	8500 PSI	275	275	283	NA	NA	NA	315	339	343	224	244	244	NA	NA	NA	140	140	144	192	196	224	103	115	115	187	195	195	359	359	NA	336	344	352	346	346	352	191	197	201	173	173	NA	220	220	222	156	156	168
2023-PLATE-110_2022-2354_61-Pressure_8500PSI_R1_061	8500 PSI	267	275	275	NA	NA	NA	327	343	343	224	224	NA	NA	NA	NA	140	140	144	188	196	200	103	103	115	187	193	197	363	363	365	344	372	372	352	360	360	191	197	201	175	175	NA	220	222	222	154	154	156
2023-PLATE-110_2022-2354_62-Pressure_8500PSI_R1_062	8500 PSI	275	279	283	NA	NA	NA	319	343	343	224	244	249	NA	NA	NA	140	140	NA	200	200	208	103	115	115	195	197	197	359	359	363	364	372	372	346	346	360	191	197	201	173	173	NA	222	226	226	154	156	168
2023-PLATE-110_2022-2354_63-Pressure_8500PSI_R1_063	8500 PSI	267	275	275	NA	NA	NA	315	339	343	224	244	244	NA	NA	NA	NA	NA	NA	192	208	224	103	115	115	187	193	195	359	359	NA	336	344	352	346	346	NA	197	197	201	173	173	175	220	220	222	156	156	NA
2023-PLATE-110_2022-2354_64-Pressure_8500PSI_R1_064	8500 PSI	267	275	275	148	152	164	319	343	343	224	244	249	NA	NA	NA	140	140	NA	200	200	208	103	115	115	187	195	197	359	359	363	336	364	372	346	346	NA	191	197	201	173	173	NA	220	222	226	154	154	168
2023-PLATE-110_2022-2354_65-Pressure_8500PSI_R1_065	8500 PSI	279	279	283	148	152	164	319	343	343	224	244	249	NA	NA	NA	NA	NA	NA	200	200	208	115	115	NA	187	195	197	359	359	363	336	364	372	346	346	NA	191	197	201	173	173	175	222	226	226	154	156	168
2023-PLATE-110_2022-2354_66-Pressure_8500PSI_R1_066	8500 PSI	275	279	283	148	152	164	319	343	343	224	244	249	NA	NA	NA	140	140	144	200	200	208	103	115	115	195	197	197	359	363	365	364	372	372	346	346	360	191	191	201	173	173	175	220	220	222	154	168	168
2023-PLATE-110_2022-2354_67-Pressure_8500PSI_R1_067	8500 PSI	275	275	283	NA	NA	NA	315	319	339	224	244	244	NA	NA	NA	140	140	144	192	208	224	103	115	115	193	193	197	359	359	NA	344	352	372	346	352	360	191	197	201	173	173	175	220	220	222	156	156	168
2023-PLATE-110_2022-2354_68-Pressure_8500PSI_R1_068	8500 PSI	275	275	283	NA	NA	NA	315	339	343	224	244	244	NA	NA	NA	NA	NA	NA	192	196	224	115	115	NA	193	195	197	359	359	365	344	352	372	346	352	360	191	197	201	173	173	175	220	220	222	156	156	168
2023-PLATE-110_2022-2354_69-Pressure_8500PSI_R1_069	8500 PSI	275	275	283	148	152	164	319	343	343	224	244	249	NA	NA	NA	140	140	144	196	200	200	103	115	115	195	197	197	359	359	363	364	372	372	346	346	NA	191	191	201	173	173	175	220	222	226	154	154	168
2023-PLATE-110_2022-2354_70-Pressure_8500PSI_R1_070	8500 PSI	275	275	283	NA	NA	NA	319	327	343	224	224	NA	NA	NA	NA	140	140	NA	188	200	208	103	103	115	193	193	197	363	363	365	344	372	372	352	360	360	197	197	201	175	175	NA	220	220	222	154	154	168
2023-PLATE-110_2022-2354_71-Pressure_8500PSI_R1_071	8500 PSI	267	275	275	NA	NA	NA	319	327	343	224	224	NA	NA	NA	NA	140	140	144	188	196	200	103	115	115	187	193	197	363	365	365	344	372	372	352	352	360	191	197	201	173	173	175	220	222	222	154	154	156
2023-PLATE-110_2022-2354_72-Pressure_8500PSI_R1_072	8500 PSI	279	279	283	NA	NA	NA	319	343	343	224	244	249	NA	NA	NA	NA	NA	NA	200	200	208	103	115	115	195	197	197	363	363	365	364	372	372	346	346	NA	191	191	201	173	173	NA	220	222	226	154	156	168
2023-PLATE-110_2022-2354_73-Pressure_8500PSI_R1_073	8500 PSI	267	275	275	NA	NA	NA	327	343	343	224	224	NA	NA	NA	NA	NA	NA	NA	188	200	208	103	115	115	187	187	NA	359	365	365	336	344	372	346	352	360	197	197	201	173	173	175	220	222	222	154	154	156
2023-PLATE-110_2022-2354_74-Pressure_8500PSI_R1_074	8500 PSI	275	275	283	124	148	164	343	343	NA	224	244	249	NA	NA	NA	NA	NA	NA	196	200	200	103	115	115	195	195	197	359	359	NA	364	372	372	346	346	360	191	191	201	173	173	NA	220	220	222	154	154	168
2023-PLATE-110_2022-2354_75-Pressure_8500PSI_R1_075	8500 PSI	267	279	279	NA	NA	NA	319	343	343	224	244	249	NA	NA	NA	140	140	NA	196	200	200	115	115	NA	187	195	197	359	363	365	336	364	372	346	346	360	191	197	201	173	173	175	220	222	226	154	156	168
2023-PLATE-110_2022-2354_76-Pressure_8500PSI_R1_076	8500 PSI	267	275	275	NA	NA	NA	327	343	343	224	224	NA	NA	NA	NA	140	140	NA	188	196	200	103	103	115	187	187	NA	359	365	365	336	344	372	352	360	360	197	197	201	175	175	NA	220	222	222	154	154	156
2023-PLATE-110_2022-2354_77-Pressure_8500PSI_R1_077	8500 PSI	275	275	283	148	152	164	315	339	343	224	244	244	NA	NA	NA	140	140	NA	192	196	224	103	115	115	193	195	197	359	359	365	344	352	372	346	346	352	197	197	201	173	173	NA	220	220	222	156	156	168
2023-PLATE-110_2022-2354_78-Pressure_8500PSI_R1_078	8500 PSI	267	275	275	NA	NA	NA	315	339	343	224	244	244	NA	NA	NA	140	140	NA	192	208	224	103	115	115	193	195	197	359	359	365	344	352	372	346	346	352	197	197	201	173	173	175	220	220	222	156	156	NA
2023-PLATE-110_2022-2354_79-Pressure_8500PSI_R1_079	8500 PSI	267	275	275	124	148	164	327	343	343	224	224	NA	NA	NA	NA	140	140	NA	188	196	200	103	115	115	193	193	197	363	363	365	344	372	372	346	352	360	197	197	201	173	175	175	220	222	222	154	154	156
2023-PLATE-110_2022-2354_80-Pressure_8500PSI_R1_080	8500 PSI	275	275	283	NA	NA	NA	319	343	343	224	244	249	NA	NA	NA	140	140	144	196	200	200	115	115	NA	187	195	197	359	359	363	336	364	372	346	346	NA	191	191	201	173	173	175	220	222	226	154	156	168
2023-PLATE-110_2022-2354_81-Pressure_8500PSI_R1_081	8500 PSI	267	279	279	NA	NA	NA	343	343	NA	224	244	249	NA	NA	NA	140	140	NA	196	200	200	103	115	115	195	197	197	359	363	365	364	372	372	346	346	NA	191	197	201	173	173	175	220	222	226	154	154	168
2023-PLATE-110_2022-2354_82-Pressure_8500PSI_R1_082	8500 PSI	275	275	283	124	148	164	315	319	339	224	244	244	NA	NA	NA	140	140	144	192	196	224	103	115	115	193	195	197	359	359	365	344	352	372	346	352	352	191	201	201	173	173	NA	220	220	222	156	156	168
2023-PLATE-110_2022-2354_83-Pressure_8500PSI_R1_083	8500 PSI	267	275	275	NA	NA	NA	315	319	339	224	244	244	NA	NA	NA	140	140	144	192	208	224	115	115	NA	193	193	197	359	359	365	344	352	376	346	352	360	191	197	201	173	173	175	220	220	222	156	156	NA
2023-PLATE-110_2022-2354_84-Pressure_8500PSI_R1_084	8500 PSI	267	279	279	NA	NA	NA	343	343	NA	224	224	NA	NA	NA	NA	140	140	NA	188	200	208	115	115	NA	187	193	197	363	365	365	344	372	372	352	360	360	197	197	201	173	175	175	220	220	222	154	154	156
2023-PLATE-110_2022-2354_85-Pressure_8500PSI_R1_085	8500 PSI	267	279	279	124	148	148	343	343	NA	224	244	249	NA	NA	NA	140	140	NA	196	200	200	115	115	NA	187	195	197	359	359	363	336	364	372	346	346	360	191	197	201	173	173	175	220	222	226	154	168	168
2023-PLATE-110_2022-2354_86-Pressure_8500PSI_R1_086	8500 PSI	275	275	283	NA	NA	NA	315	339	343	224	244	244	NA	NA	NA	140	140	NA	196	224	224	103	115	115	193	195	197	359	359	365	344	352	372	346	346	352	197	197	NA	173	173	175	220	220	222	156	156	168
2023-PLATE-110_2022-2354_87-Pressure_8500PSI_R1_087	8500 PSI	275	279	283	NA	NA	NA	319	343	343	224	244	249	NA	NA	NA	140	140	NA	200	200	208	115	115	NA	187	197	197	359	363	363	336	364	372	346	346	360	191	191	197	173	173	175	220	222	226	154	168	168
2023-PLATE-110_2022-2354_88-Pressure_8500PSI_R1_088	8500 PSI	267	275	275	NA	NA	NA	315	339	343	224	244	244	NA	NA	NA	140	140	NA	192	196	224	103	115	115	187	193	195	359	359	NA	336	344	352	346	352	360	197	197	201	173	173	175	220	220	222	156	156	168
2023-PLATE-110_2022-2354_89-Pressure_8500PSI_R1_089	8500 PSI	267	275	275	NA	NA	NA	327	343	343	224	224	NA	NA	NA	NA	140	140	NA	188	196	200	103	103	115	187	193	193	363	363	365	336	344	372	346	360	360	197	197	201	173	173	NA	220	222	222	154	154	156
2023-PLATE-110_2022-2354_90-Pressure_8500PSI_R1_090	8500 PSI	275	275	283	NA	NA	NA	319	339	339	224	244	244	NA	NA	NA	140	140	NA	192	196	224	115	115	NA	193	195	197	359	359	365	344	352	372	346	352	360	197	197	NA	173	173	NA	220	220	222	156	156	168
2023-PLATE-110_2022-2354_91-Pressure_8500PSI_R1_091	8500 PSI	275	275	283	NA	NA	NA	315	339	343	224	244	244	NA	NA	NA	NA	NA	NA	192	208	224	103	115	115	187	193	193	359	359	NA	336	344	352	346	346	NA	191	197	201	173	173	NA	220	220	222	156	156	NA
2023-PLATE-110_2022-2354_92-Pressure_8500PSI_R1_092	8500 PSI	267	275	275	NA	NA	NA	327	343	NA	224	224	NA	NA	NA	NA	140	140	NA	188	196	200	103	103	115	187	193	197	363	365	365	344	372	372	352	360	360	197	197	201	173	173	175	220	222	222	154	154	156
2023-PLATE-110_2022-2354_93-Pressure_8500PSI_R1_093	8500 PSI	275	275	283	NA	NA	NA	319	327	327	224	224	NA	NA	NA	NA	NA	NA	NA	188	196	200	103	103	115	187	187	193	359	363	365	336	344	372	346	352	360	191	197	201	173	173	NA	220	222	222	154	154	168
2023-PLATE-110_2022-2354_94-Pressure_8500PSI_R1_094	8500 PSI	267	279	NA	152	164	NA	319	343	NA	224	249	NA	NA	NA	NA	NA	NA	NA	200	208	NA	115	115	NA	187	197	NA	359	363	NA	336	364	NA	346	346	NA	191	191	NA	173	173	NA	220	222	NA	154	168	NA
2023-PLATE-110_2022-2354_95-Pressure_8500PSI_R1_095	8500 PSI	267	275	275	NA	NA	NA	315	339	343	224	244	244	NA	NA	NA	140	140	NA	196	224	224	115	115	NA	193	195	197	359	359	NA	344	352	372	346	352	360	197	197	NA	173	173	175	220	220	222	156	156	168
2023-PLATE-110_2022-2354_96-Pressure_8500PSI_R1_096	8500 PSI	275	275	283	NA	NA	NA	343	343	NA	224	224	NA	NA	NA	NA	NA	NA	NA	188	196	200	103	115	115	187	193	193	359	363	363	336	344	372	346	352	360	191	197	201	173	173	NA	220	222	222	154	154	168
2023-PLATE-110_2022-2354_97-Pressure_8500PSI_R1_097	8500 PSI	275	275	283	NA	NA	NA	315	319	339	224	244	244	NA	NA	NA	NA	NA	NA	192	208	224	103	115	115	193	195	197	359	359	365	344	352	372	346	346	352	191	197	201	173	173	175	220	220	222	156	156	168
2023-PLATE-110_2022-2354_98-Pressure_8500PSI_R1_098	8500 PSI	279	279	283	NA	NA	NA	343	343	NA	224	244	249	NA	NA	NA	140	140	144	200	200	208	115	115	NA	187	195	197	359	363	365	336	364	372	346	346	360	191	191	201	173	173	NA	220	222	226	154	168	168
2023-PLATE-110_2022-2354_99-Pressure_8500PSI_R1_099	8500 PSI	275	275	283	NA	NA	NA	315	319	339	224	244	244	NA	NA	NA	140	140	NA	192	208	224	103	115	115	193	195	197	359	359	365	344	352	372	352	352	360	197	197	201	173	173	NA	220	220	222	156	156	NA
2023-PLATE-112_2022-2354_145-Pressure_8500PSI_R2_045	8500 PSI	279	279	283	148	152	164	319	343	343	224	244	249	222	234	234	140	140	NA	196	200	200	115	115	NA	187	197	197	363	363	365	336	364	372	346	346	360	191	197	201	173	173	NA	220	222	226	168	168	NA
2023-PLATE-112_2022-2354_146-Pressure_8500PSI_R2_046	8500 PSI	275	275	283	148	152	164	343	343	NA	224	244	249	222	234	242	140	140	NA	196	200	200	103	115	115	187	195	197	359	359	363	336	364	372	346	346	NA	191	197	201	173	173	NA	220	222	226	154	168	168
2023-PLATE-112_2022-2354_147-Pressure_8500PSI_R2_047	8500 PSI	267	275	275	124	148	164	327	343	343	224	224	NA	206	238	242	140	140	144	188	188	208	103	103	115	193	193	197	359	363	363	344	344	372	352	360	360	191	197	201	173	173	NA	220	220	222	154	154	168
2023-PLATE-112_2022-2354_148-Pressure_8500PSI_R2_048	8500 PSI	275	275	283	148	152	164	327	343	343	224	224	NA	206	238	242	140	140	NA	188	200	208	103	115	115	187	193	197	363	365	365	344	372	372	360	360	NA	197	197	201	173	175	175	220	222	222	154	154	156
2023-PLATE-112_2022-2354_149-Pressure_8500PSI_R2_049	8500 PSI	275	275	283	148	152	164	343	343	NA	224	244	249	222	234	234	140	140	144	200	200	208	115	115	NA	187	195	195	359	359	NA	336	364	372	346	346	360	191	191	201	173	173	175	220	222	226	154	156	168
2023-PLATE-112_2022-2354_150-Pressure_8500PSI_R2_050	8500 PSI	275	279	283	152	164	NA	319	343	343	224	244	249	222	234	242	140	140	NA	200	200	208	103	115	115	187	195	197	359	363	363	336	364	372	346	346	360	191	197	201	173	173	NA	220	222	226	154	156	168
2023-PLATE-112_2022-2354_151-Pressure_8500PSI_R2_051	8500 PSI	275	275	283	124	148	164	327	343	343	NA	NA	NA	206	238	242	140	140	NA	188	196	200	103	103	NA	187	193	197	359	363	363	344	372	372	352	360	360	197	197	201	173	173	175	220	220	222	154	154	168
2023-PLATE-112_2022-2354_152-Pressure_8500PSI_R2_052	8500 PSI	275	275	283	124	148	164	315	315	319	224	244	244	238	242	246	140	140	NA	192	192	208	115	115	NA	193	195	197	359	359	365	344	352	372	346	346	352	197	197	201	173	173	175	220	220	222	156	156	168
2023-PLATE-112_2022-2354_153-Pressure_8500PSI_R2_053	8500 PSI	275	275	283	148	152	164	315	339	343	224	244	244	234	238	246	140	140	144	192	196	224	103	115	115	193	195	197	359	359	365	344	352	372	346	346	352	191	197	201	173	173	NA	220	220	222	156	156	NA
2023-PLATE-112_2022-2354_154-Pressure_8500PSI_R2_054	8500 PSI	275	275	283	124	148	164	319	339	339	224	244	244	234	238	246	140	140	NA	192	196	224	115	115	NA	187	193	193	359	359	NA	336	344	352	346	352	360	197	197	201	173	173	175	220	220	222	156	156	168
2023-PLATE-112_2022-2354_155-Pressure_8500PSI_R2_055	8500 PSI	267	275	275	124	148	164	315	319	339	224	244	244	234	238	246	140	140	144	192	192	196	103	115	115	193	195	197	359	359	365	344	352	372	346	352	360	191	197	201	173	173	175	220	220	222	156	156	NA
2023-PLATE-112_2022-2354_156-Pressure_8500PSI_R2_056	8500 PSI	267	275	275	124	148	164	319	343	343	224	244	249	222	222	242	140	140	NA	200	200	208	115	115	NA	187	195	197	359	359	363	336	364	372	346	346	NA	191	197	201	173	173	175	220	222	226	154	168	168
2023-PLATE-112_2022-2354_157-Pressure_8500PSI_R2_057	8500 PSI	267	275	275	124	148	164	319	339	339	224	244	244	238	242	246	140	140	144	192	196	224	115	115	NA	187	193	195	359	359	NA	336	344	352	346	346	352	191	197	201	173	173	NA	220	220	222	156	156	168
2023-PLATE-112_2022-2354_158-Pressure_8500PSI_R2_058	8500 PSI	267	275	275	148	152	164	315	319	339	224	244	244	234	238	238	140	140	144	192	208	224	103	115	115	193	195	197	359	359	365	344	352	372	346	352	360	191	197	201	173	173	NA	220	220	222	156	156	NA
2023-PLATE-112_2022-2354_159-Pressure_8500PSI_R2_059	8500 PSI	267	275	275	148	152	164	315	319	339	224	244	244	234	238	246	140	140	NA	192	196	224	103	115	115	187	193	195	359	359	NA	336	344	352	346	346	352	197	197	201	173	173	175	220	220	222	156	156	168
2023-PLATE-112_2022-2354_160-Pressure_8500PSI_R2_060	8500 PSI	267	275	275	124	148	164	315	319	339	224	244	244	234	238	246	140	140	144	192	196	224	103	115	115	187	193	193	359	359	NA	336	344	352	346	352	360	191	197	201	173	173	175	220	220	222	156	156	NA
2023-PLATE-112_2022-2354_161-Pressure_8500PSI_R2_061	8500 PSI	267	275	275	148	152	164	315	319	339	224	244	244	234	238	246	140	140	144	192	208	224	103	115	115	193	195	197	359	359	NA	344	352	372	346	346	352	191	197	201	173	173	NA	220	220	222	156	156	168
2023-PLATE-112_2022-2354_162-Pressure_8500PSI_R2_062	8500 PSI	267	275	275	148	152	164	315	339	343	224	244	244	238	242	246	140	140	NA	192	208	224	103	115	115	193	195	197	359	359	365	344	352	372	346	346	352	197	197	201	173	173	NA	220	220	222	156	156	168
2023-PLATE-112_2022-2354_163-Pressure_8500PSI_R2_063	8500 PSI	275	275	283	124	148	164	327	343	343	NA	NA	NA	206	206	234	140	140	144	196	200	200	103	115	115	187	187	193	363	365	365	336	344	372	346	352	360	191	197	197	173	175	175	220	222	222	154	154	168
2023-PLATE-112_2022-2354_164-Pressure_8500PSI_R2_064	8500 PSI	267	275	275	148	152	164	343	343	347	NA	NA	NA	206	238	242	140	140	144	188	196	200	103	103	115	187	187	193	359	363	365	336	344	372	346	352	360	191	197	201	175	175	NA	220	222	222	154	154	156
2023-PLATE-112_2022-2354_165-Pressure_8500PSI_R2_065	8500 PSI	267	275	275	124	148	164	319	343	343	224	244	249	222	234	242	140	140	144	200	200	208	115	115	NA	195	197	197	359	363	365	364	372	372	346	346	NA	191	191	201	173	173	175	220	222	226	154	168	168
2023-PLATE-112_2022-2354_166-Pressure_8500PSI_R2_066	8500 PSI	267	275	275	124	148	164	315	339	343	224	244	244	238	242	246	140	140	NA	192	208	224	115	115	NA	187	193	195	359	359	365	336	344	352	346	352	360	197	197	201	173	173	175	220	220	222	156	156	168
2023-PLATE-112_2022-2354_167-Pressure_8500PSI_R2_067	8500 PSI	267	275	275	148	152	164	315	339	343	224	244	244	238	242	246	140	140	NA	192	208	224	115	115	NA	195	195	197	359	359	365	344	352	372	346	346	352	197	197	201	173	173	NA	220	220	222	156	156	168
2023-PLATE-112_2022-2354_168-Pressure_8500PSI_R2_068	8500 PSI	275	275	283	148	152	164	315	339	343	224	244	244	238	242	246	140	140	144	192	208	224	115	115	NA	187	193	195	359	359	365	336	344	352	346	346	352	191	197	201	173	173	NA	220	220	222	156	156	168
2023-PLATE-112_2022-2354_169-Pressure_8500PSI_R2_069	8500 PSI	275	275	283	148	152	164	319	343	343	224	244	249	222	234	242	140	140	NA	196	200	200	103	115	115	187	195	195	359	359	365	336	364	372	346	346	NA	197	201	201	173	173	NA	220	222	226	154	156	168
2023-PLATE-112_2022-2354_170-Pressure_8500PSI_R2_070	8500 PSI	275	275	283	148	152	164	315	319	339	224	244	244	234	238	246	140	140	144	192	208	224	103	115	115	195	195	197	359	359	NA	344	352	372	346	346	352	191	197	201	173	173	175	220	220	222	156	156	NA
2023-PLATE-112_2022-2354_171-Pressure_8500PSI_R2_071	8500 PSI	275	275	283	148	152	164	319	327	343	NA	NA	NA	234	238	238	140	140	144	188	196	200	103	103	NA	187	187	193	363	365	365	336	344	372	346	352	360	191	197	201	173	173	175	220	222	222	154	154	168
2023-PLATE-112_2022-2354_172-Pressure_8500PSI_R2_072	8500 PSI	275	275	283	148	152	164	315	339	343	224	244	244	234	238	246	140	140	NA	192	208	224	103	115	115	193	195	197	359	359	365	344	352	372	346	346	352	197	197	201	173	173	175	220	220	222	156	156	NA
2023-PLATE-112_2022-2354_173-Pressure_8500PSI_R2_073	8500 PSI	275	275	283	148	152	164	327	343	343	NA	NA	NA	206	238	242	140	140	144	188	200	208	103	115	115	187	187	197	359	365	365	372	372	NA	346	352	360	191	197	201	173	173	175	220	220	222	154	154	156
2023-PLATE-112_2022-2354_174-Pressure_8500PSI_R2_074	8500 PSI	267	275	275	124	148	164	327	343	343	224	224	NA	206	206	234	140	140	NA	188	196	200	103	115	115	187	187	197	365	365	NA	344	372	372	346	352	360	197	197	201	173	175	175	220	220	222	154	154	156
2023-PLATE-112_2022-2354_175-Pressure_8500PSI_R2_075	8500 PSI	275	275	283	124	148	164	315	339	343	224	244	244	238	242	246	140	140	144	192	196	224	103	115	115	193	195	197	359	359	NA	344	352	372	346	352	360	191	197	201	173	173	NA	220	220	222	156	156	168
2023-PLATE-112_2022-2354_176-Pressure_8500PSI_R2_076	8500 PSI	279	279	283	148	152	164	343	343	NA	224	244	249	222	234	242	140	140	144	196	200	200	115	115	NA	187	195	197	359	363	365	336	364	372	346	346	NA	191	191	201	173	173	175	220	222	226	154	156	168
2023-PLATE-112_2022-2354_177-Pressure_8500PSI_R2_077	8500 PSI	267	275	275	124	148	164	319	327	343	NA	NA	NA	206	234	238	140	140	NA	188	200	208	115	115	NA	187	187	193	359	363	365	336	344	372	352	360	360	197	197	201	175	175	NA	220	220	222	154	154	168
2023-PLATE-112_2022-2354_178-Pressure_8500PSI_R2_078	8500 PSI	275	275	283	124	148	164	315	319	339	224	244	244	242	246	246	140	140	144	196	224	224	115	115	NA	187	193	193	359	359	NA	336	344	352	346	352	360	191	197	197	173	173	175	220	220	222	156	156	168
2023-PLATE-112_2022-2354_179-Pressure_8500PSI_R2_079	8500 PSI	267	275	275	124	148	164	315	315	343	224	244	244	234	238	246	140	140	NA	192	196	224	115	115	NA	187	193	195	359	359	NA	336	344	352	346	346	352	197	197	201	173	173	175	220	220	222	156	156	NA
2023-PLATE-112_2022-2354_180-Pressure_8500PSI_R2_080	8500 PSI	275	275	283	148	152	164	327	335	343	NA	NA	NA	234	238	238	140	140	NA	188	200	208	103	103	NA	187	193	197	359	363	365	344	372	372	352	360	360	197	197	201	173	173	175	222	222	NA	154	154	156
2023-PLATE-112_2022-2354_181-Pressure_8500PSI_R2_081	8500 PSI	267	279	279	148	152	164	343	343	NA	224	244	249	222	234	234	140	140	NA	196	200	200	103	115	115	195	195	197	359	359	NA	364	372	372	346	346	NA	191	197	201	173	173	NA	220	222	226	154	156	168
2023-PLATE-112_2022-2354_182-Pressure_8500PSI_R2_082	8500 PSI	267	275	275	124	148	164	319	327	343	224	224	NA	206	206	242	140	140	NA	188	196	200	103	103	115	187	187	193	359	365	365	336	344	372	346	352	360	197	197	201	173	173	175	222	222	NA	154	154	156
2023-PLATE-112_2022-2354_183-Pressure_8500PSI_R2_083	8500 PSI	267	275	275	148	152	164	315	339	343	224	244	244	234	238	246	140	140	144	192	208	224	103	115	115	187	193	195	359	359	NA	336	344	352	346	346	352	191	201	201	173	173	NA	220	220	222	156	156	NA
2023-PLATE-112_2022-2354_184-Pressure_8500PSI_R2_084	8500 PSI	275	275	283	148	152	164	327	327	343	NA	NA	NA	206	234	238	140	140	144	188	188	196	103	103	NA	187	187	197	365	365	NA	344	372	372	346	352	360	191	197	201	173	173	NA	220	222	222	154	154	168
2023-PLATE-112_2022-2354_185-Pressure_8500PSI_R2_085	8500 PSI	267	275	275	148	152	164	315	339	343	224	244	244	234	238	246	140	140	144	196	224	224	103	115	115	193	195	197	359	359	365	344	352	372	346	346	352	191	197	201	173	173	NA	220	220	222	156	156	168
2023-PLATE-112_2022-2354_186-Pressure_8500PSI_R2_086	8500 PSI	267	275	279	124	148	164	319	343	343	224	244	249	222	234	242	140	140	NA	200	200	208	115	115	NA	195	197	197	359	363	365	364	372	372	346	346	NA	197	201	201	173	173	NA	220	222	226	154	168	168
2023-PLATE-112_2022-2354_187-Pressure_8500PSI_R2_087	8500 PSI	275	275	283	148	152	164	315	339	343	224	244	244	234	238	246	140	140	NA	192	196	224	115	115	NA	193	195	197	359	359	365	344	352	372	346	346	352	197	197	201	173	173	175	220	220	222	156	156	NA
2023-PLATE-112_2022-2354_188-Pressure_8500PSI_R2_088	8500 PSI	275	275	283	148	152	164	327	343	343	NA	NA	NA	206	234	238	140	140	144	188	200	208	103	115	115	187	187	193	363	365	365	336	344	372	346	352	352	191	197	201	173	173	175	220	222	222	154	154	168
2023-PLATE-112_2022-2354_189-Pressure_8500PSI_R2_089	8500 PSI	279	279	283	148	152	164	343	343	NA	224	244	249	222	234	242	140	140	144	196	200	200	103	115	115	195	197	197	359	359	NA	364	372	372	346	346	360	191	191	201	173	173	175	220	222	226	154	156	168
2023-PLATE-112_2022-2354_190-Pressure_8500PSI_R2_090	8500 PSI	275	275	283	152	164	164	327	343	343	NA	NA	NA	234	238	238	140	140	144	188	196	200	103	115	115	187	187	193	363	365	365	336	344	372	346	352	352	191	197	201	175	175	NA	222	222	NA	154	154	168
2023-PLATE-112_2022-2354_191-Pressure_8500PSI_R2_091	8500 PSI	275	275	283	148	152	164	315	339	343	224	244	244	238	242	246	140	140	144	192	208	224	103	115	115	187	193	195	359	359	NA	336	344	352	346	346	360	191	201	201	173	173	NA	220	220	222	156	156	168
2023-PLATE-112_2022-2354_192-Pressure_8500PSI_R2_092	8500 PSI	267	275	275	148	152	164	315	319	339	224	244	244	238	242	246	140	140	NA	192	208	224	103	115	115	187	193	195	359	359	NA	336	344	352	346	352	360	197	197	201	173	173	NA	220	220	222	156	156	168
2023-PLATE-112_2022-2354_193-Pressure_8500PSI_R2_093	8500 PSI	275	275	283	148	152	164	315	339	343	224	244	244	238	242	246	140	140	144	192	208	224	115	115	NA	187	193	193	359	359	NA	336	344	352	346	346	352	191	197	201	173	173	NA	220	220	222	156	156	NA
2023-PLATE-112_2022-2354_194-Pressure_8500PSI_R2_094	8500 PSI	267	275	275	148	152	164	339	339	343	224	244	244	234	238	246	140	140	NA	192	196	224	115	115	NA	195	195	197	359	359	365	344	352	372	346	346	352	197	197	201	173	173	175	220	220	222	156	156	NA
2023-PLATE-112_2022-2354_195-Pressure_8500PSI_R2_095	8500 PSI	275	275	283	148	152	164	315	339	343	224	244	244	234	238	246	140	140	144	208	224	224	115	115	NA	193	195	197	359	359	365	344	352	372	346	346	352	NA	NA	NA	173	173	NA	220	220	222	156	156	168
2023-PLATE-112_2022-2354_196-Pressure_8500PSI_R2_096	8500 PSI	279	279	283	124	148	164	343	343	NA	224	244	249	222	234	234	140	140	NA	200	200	208	103	115	115	187	197	197	363	363	365	336	364	364	346	346	360	191	197	201	173	173	NA	220	222	226	154	154	156
2023-PLATE-112_2022-2354_197-Pressure_8500PSI_R2_097	8500 PSI	267	275	275	148	152	164	343	343	NA	224	224	NA	234	238	238	140	140	NA	188	196	200	103	103	115	187	193	197	363	365	365	344	372	372	346	352	360	197	197	201	173	173	175	222	222	NA	154	154	168
2023-PLATE-112_2022-2354_198-Pressure_8500PSI_R2_098	8500 PSI	275	275	283	148	152	164	319	327	327	224	224	NA	206	238	242	140	140	NA	188	200	208	103	103	115	187	187	193	363	365	365	336	344	372	360	360	NA	197	197	NA	173	173	175	220	222	222	154	154	168
2023-PLATE-112_2022-2354_199-Pressure_8500PSI_R2_099	8500 PSI	275	275	283	124	148	164	315	339	343	224	244	244	234	238	246	140	140	144	192	208	224	103	115	115	193	195	197	359	359	365	344	352	372	346	346	352	191	197	201	173	173	NA	220	220	222	156	156	168
2023-PLATE-112_2022-2354_200-Pressure_8500PSI_R2_100	8500 PSI	267	275	275	124	148	164	315	319	339	224	244	244	242	246	246	140	140	144	192	196	224	115	115	NA	187	193	195	359	359	NA	336	344	352	346	352	360	191	197	201	173	173	NA	220	220	222	156	156	168
2023-PLATE-112_2022-2355_1-Pressure_9500PSI_R1_001	9500 PSI	275	275	283	124	148	164	343	343	NA	224	244	249	222	234	234	140	140	144	200	200	208	115	115	NA	187	195	197	359	359	363	336	364	372	346	346	NA	191	191	NA	173	173	175	220	222	226	154	154	156
2023-PLATE-112_2022-2355_10-Pressure_9500PSI_R1_010	9500 PSI	275	275	283	148	152	164	319	339	339	224	244	244	238	242	246	140	140	NA	192	196	224	115	115	NA	193	195	197	359	359	NA	344	352	372	346	352	360	197	197	201	173	173	175	220	220	222	156	156	NA
2023-PLATE-112_2022-2355_11-Pressure_9500PSI_R1_011	9500 PSI	267	275	275	148	152	164	319	343	343	224	244	249	222	234	234	140	140	144	196	200	200	115	115	NA	195	197	197	359	363	365	364	372	372	346	346	NA	191	191	NA	173	173	NA	220	222	226	156	168	168
2023-PLATE-112_2022-2355_12-Pressure_9500PSI_R1_012	9500 PSI	275	279	283	124	148	164	343	343	NA	224	244	249	222	234	234	140	140	144	200	200	208	115	115	NA	195	195	197	359	359	365	364	372	372	346	346	360	191	191	201	173	173	175	220	222	226	154	154	168
2023-PLATE-112_2022-2355_13-Pressure_9500PSI_R1_013	9500 PSI	267	275	275	148	152	164	315	319	339	224	244	244	238	242	246	140	140	144	196	224	224	115	115	NA	187	193	195	359	359	NA	336	344	352	346	346	352	191	197	197	173	173	NA	220	220	222	156	156	168
2023-PLATE-112_2022-2355_14-Pressure_9500PSI_R1_014	9500 PSI	267	275	275	124	148	164	319	327	343	224	224	NA	206	234	238	140	140	144	188	188	196	103	115	115	187	193	193	359	363	363	336	344	372	346	352	360	191	197	201	173	173	175	220	222	222	154	154	168
2023-PLATE-112_2022-2355_15-Pressure_9500PSI_R1_015	9500 PSI	275	275	283	148	152	164	315	319	339	224	244	244	238	242	246	140	140	144	192	208	224	103	115	115	193	195	197	359	359	365	344	352	372	346	352	360	191	197	201	173	173	NA	220	220	222	156	156	168
2023-PLATE-112_2022-2355_16-Pressure_9500PSI_R1_016	9500 PSI	NA	NA	NA	148	152	164	315	319	339	224	244	244	234	238	246	140	140	144	192	208	224	103	115	115	193	195	197	359	359	365	344	352	372	346	346	352	191	197	201	173	173	NA	220	220	222	156	156	NA
2023-PLATE-112_2022-2355_17-Pressure_9500PSI_R1_017	9500 PSI	267	275	275	124	148	164	315	339	343	224	244	244	234	238	246	140	140	NA	192	196	224	103	115	115	187	193	195	359	359	NA	336	344	352	346	346	360	197	197	201	173	173	175	220	220	222	156	156	168
2023-PLATE-112_2022-2355_18-Pressure_9500PSI_R1_018	9500 PSI	275	279	283	148	152	164	343	343	NA	224	244	249	222	234	242	140	140	NA	196	200	200	103	115	115	187	197	197	359	363	363	336	364	372	346	346	NA	191	197	201	173	173	175	220	222	226	156	168	168
2023-PLATE-112_2022-2355_19-Pressure_9500PSI_R1_019	9500 PSI	279	279	283	148	152	164	319	343	343	224	244	249	222	234	242	140	140	144	200	200	208	103	115	115	187	195	197	359	363	365	336	364	372	346	346	360	191	191	201	173	173	175	220	222	226	156	168	168
2023-PLATE-112_2022-2355_2-Pressure_9500PSI_R1_002	9500 PSI	267	275	275	148	152	164	319	327	343	NA	NA	NA	206	238	242	140	140	144	188	196	200	103	103	115	187	187	193	359	363	365	336	344	372	346	352	360	191	201	201	173	173	175	220	222	222	154	154	168
2023-PLATE-112_2022-2355_20-Pressure_9500PSI_R1_020	9500 PSI	267	275	275	152	164	164	315	339	343	224	244	244	238	242	246	140	140	NA	192	208	224	103	115	115	193	195	197	359	359	365	344	352	372	352	352	360	197	197	201	173	173	NA	220	220	222	156	156	NA
2023-PLATE-112_2022-2355_21-Pressure_9500PSI_R1_021	9500 PSI	275	275	283	148	152	164	319	327	343	224	224	NA	234	238	238	140	140	NA	188	196	200	103	103	NA	187	187	193	363	365	365	336	344	372	352	360	360	197	197	201	173	175	175	220	222	222	154	154	156
2023-PLATE-112_2022-2355_22-Pressure_9500PSI_R1_022	9500 PSI	275	275	283	124	148	164	327	343	343	224	224	NA	206	238	242	140	140	NA	188	200	208	103	115	115	187	187	193	363	365	365	336	344	372	352	360	360	197	197	201	173	173	NA	222	222	NA	154	154	168
2023-PLATE-112_2022-2355_23-Pressure_9500PSI_R1_023	9500 PSI	267	275	275	124	148	164	327	343	343	224	224	NA	206	238	242	140	140	144	188	196	200	103	103	115	187	187	NA	359	365	365	336	344	372	352	360	360	191	197	201	173	173	NA	222	222	NA	154	154	168
2023-PLATE-112_2022-2355_24-Pressure_9500PSI_R1_024	9500 PSI	275	275	283	124	148	164	315	339	343	224	244	244	238	242	246	140	140	NA	192	196	224	115	115	NA	193	195	197	359	359	365	344	352	372	346	346	352	197	197	201	173	173	NA	220	220	222	156	156	168
2023-PLATE-112_2022-2355_25-Pressure_9500PSI_R1_025	9500 PSI	275	275	283	148	152	164	319	327	327	224	224	NA	206	234	238	140	140	144	188	200	208	103	115	115	187	193	197	359	365	365	344	372	372	352	360	360	191	197	201	173	173	175	220	220	222	154	154	156
2023-PLATE-112_2022-2355_26-Pressure_9500PSI_R1_026	9500 PSI	275	275	283	148	152	164	343	343	NA	224	244	249	222	234	242	140	140	144	196	200	200	103	115	115	187	195	197	359	359	363	336	364	372	346	346	360	191	191	201	173	173	175	220	222	226	154	168	168
2023-PLATE-112_2022-2355_27-Pressure_9500PSI_R1_027	9500 PSI	267	275	275	148	152	164	319	343	343	224	244	249	222	234	242	140	140	144	200	200	208	103	115	115	187	195	195	359	359	365	336	364	372	346	346	360	191	191	201	173	173	NA	220	220	222	156	168	168
2023-PLATE-112_2022-2355_28-Pressure_9500PSI_R1_028	9500 PSI	275	275	283	124	148	164	319	327	343	NA	NA	NA	206	234	238	140	140	NA	188	200	208	103	103	115	187	193	197	359	363	365	344	372	372	352	352	360	197	197	201	173	173	NA	220	222	222	154	154	156
2023-PLATE-112_2022-2355_29-Pressure_9500PSI_R1_029	9500 PSI	267	275	279	148	152	164	343	343	NA	224	244	249	222	234	242	140	140	NA	196	200	200	103	115	115	195	195	197	359	359	365	364	372	372	346	346	NA	191	197	201	173	173	NA	220	222	226	154	154	168
2023-PLATE-112_2022-2355_3-Pressure_9500PSI_R1_003	9500 PSI	267	275	275	124	148	164	315	339	343	224	244	244	234	238	246	140	140	144	192	208	224	103	115	115	187	193	195	359	359	NA	336	344	352	346	346	352	191	197	201	173	173	175	220	220	222	156	156	168
2023-PLATE-112_2022-2355_30-Pressure_9500PSI_R1_030	9500 PSI	275	275	283	148	152	164	327	343	343	224	224	NA	206	238	242	140	140	144	188	196	200	103	115	115	187	187	NA	359	365	365	336	344	372	346	352	360	191	197	201	173	173	175	220	220	222	154	154	156
2023-PLATE-112_2022-2355_31-Pressure_9500PSI_R1_031	9500 PSI	267	275	275	148	152	164	319	327	343	224	224	NA	206	238	242	140	140	NA	188	200	208	103	115	115	187	187	197	365	365	NA	344	372	372	346	352	360	197	197	201	173	175	175	220	220	222	154	154	156
2023-PLATE-112_2022-2355_32-Pressure_9500PSI_R1_032	9500 PSI	275	275	283	124	148	164	319	343	343	224	244	249	234	234	242	140	140	144	196	200	200	103	115	115	195	197	197	359	363	363	364	372	372	346	346	NA	191	191	201	173	173	NA	220	222	226	154	154	168
2023-PLATE-112_2022-2355_33-Pressure_9500PSI_R1_033	9500 PSI	267	275	275	148	152	164	319	327	343	224	224	NA	206	234	238	140	140	144	188	200	208	103	115	115	187	187	193	359	363	365	336	344	372	346	352	360	191	197	201	175	175	NA	222	222	NA	154	154	156
2023-PLATE-112_2022-2355_34-Pressure_9500PSI_R1_034	9500 PSI	275	279	283	124	148	164	343	343	NA	224	244	249	222	234	234	140	140	144	196	200	200	103	115	115	195	197	197	359	363	365	364	372	372	346	346	360	191	191	201	173	173	175	220	222	226	154	156	168
2023-PLATE-112_2022-2355_35-Pressure_9500PSI_R1_035	9500 PSI	267	279	279	124	148	164	343	343	NA	224	244	249	222	234	234	140	140	NA	200	200	208	115	115	NA	195	197	197	359	363	365	364	372	372	346	346	NA	191	197	201	173	173	175	220	222	226	154	168	168
2023-PLATE-112_2022-2355_36-Pressure_9500PSI_R1_036	9500 PSI	275	275	283	124	148	164	319	327	343	224	224	NA	206	206	242	140	140	144	188	200	208	115	115	NA	187	193	197	363	365	365	344	372	372	352	360	360	191	197	201	173	173	175	220	222	222	154	154	156
2023-PLATE-112_2022-2355_37-Pressure_9500PSI_R1_037	9500 PSI	267	275	275	148	152	164	315	319	339	224	244	244	234	238	238	140	140	NA	192	192	196	103	115	115	187	193	193	NA	NA	NA	336	344	344	346	352	360	197	197	201	173	173	NA	220	220	222	156	156	NA
2023-PLATE-112_2022-2355_38-Pressure_9500PSI_R1_038	9500 PSI	267	275	275	124	148	164	327	343	343	224	224	NA	206	234	238	140	140	144	188	200	208	103	103	115	193	193	197	359	363	363	344	372	372	346	352	360	191	197	197	173	173	175	222	222	NA	154	154	156
2023-PLATE-112_2022-2355_4-Pressure_9500PSI_R1_004	9500 PSI	275	275	283	124	148	164	327	343	343	224	224	NA	234	238	238	140	140	NA	188	196	200	103	115	115	187	193	193	359	363	363	336	344	344	346	352	360	197	201	201	173	173	175	220	222	222	154	154	168
2023-PLATE-112_2022-2355_5-Pressure_9500PSI_R1_005	9500 PSI	275	279	283	148	152	164	319	343	343	224	244	249	222	234	242	140	140	144	200	200	208	103	115	115	195	197	197	359	363	365	364	372	372	346	346	360	191	191	201	173	173	175	220	222	226	154	156	168
2023-PLATE-112_2022-2355_6-Pressure_9500PSI_R1_006	9500 PSI	267	275	275	148	152	164	315	339	343	224	244	244	238	242	246	140	140	144	192	196	224	103	115	115	193	195	197	359	359	365	344	352	372	346	346	352	191	201	201	173	173	NA	220	220	222	156	156	168
2023-PLATE-112_2022-2355_7-Pressure_9500PSI_R1_007	9500 PSI	267	279	279	148	152	164	319	343	343	224	244	249	222	234	242	140	140	144	200	200	208	115	115	NA	195	195	197	359	359	365	364	372	372	346	346	360	191	191	201	173	173	NA	220	220	222	154	156	168
2023-PLATE-112_2022-2355_8-Pressure_9500PSI_R1_008	9500 PSI	275	275	283	148	152	164	343	343	NA	224	244	249	222	234	242	140	140	NA	196	200	200	103	115	115	187	195	197	359	363	365	336	364	372	346	346	NA	191	197	201	173	173	175	220	222	226	154	168	168
2023-PLATE-112_2022-2355_9-Pressure_9500PSI_R1_009	9500 PSI	267	275	275	124	148	164	343	343	NA	224	244	249	222	234	234	140	140	144	200	200	208	115	115	NA	195	195	197	359	359	365	364	372	372	346	346	360	191	191	201	173	173	175	220	222	NA	156	168	168
2023-PLATE-113_2022-2355_100-Pressure_9500PSI_R1_100	9500 PSI	275	275	283	124	148	164	339	339	343	224	244	244	238	242	246	140	140	NA	192	196	224	103	115	115	193	193	197	359	359	365	344	352	372	346	352	360	197	197	201	173	173	175	220	220	222	156	156	168
2023-PLATE-113_2022-2355_101-Pressure_9500PSI_R1_101	9500 PSI	275	275	283	148	152	164	319	327	343	224	224	NA	206	234	238	140	140	NA	188	188	196	103	103	115	187	193	197	363	365	365	344	372	372	352	360	360	197	201	201	173	173	175	222	222	NA	154	154	168
2023-PLATE-113_2022-2355_102-Pressure_9500PSI_R1_102	9500 PSI	267	275	275	148	152	164	315	319	339	NA	NA	NA	234	238	246	140	140	NA	196	224	224	115	115	NA	187	193	195	359	359	NA	336	344	352	346	346	352	197	197	201	173	173	175	220	220	222	156	156	NA
2023-PLATE-113_2022-2355_103-Pressure_9500PSI_R1_103	9500 PSI	267	279	279	124	148	164	343	343	NA	224	244	249	222	234	242	140	140	144	196	200	200	103	115	115	187	197	197	359	363	363	336	364	372	346	346	360	191	191	201	173	173	175	220	222	226	154	168	168
2023-PLATE-113_2022-2355_104-Pressure_9500PSI_R1_104	9500 PSI	275	275	283	148	152	164	327	343	343	224	224	NA	206	206	242	140	140	NA	188	196	200	103	115	115	187	193	197	363	365	365	344	372	372	352	360	360	197	197	201	175	175	NA	222	222	NA	154	154	168
2023-PLATE-113_2022-2355_105-Pressure_9500PSI_R1_105	9500 PSI	267	275	279	148	152	164	319	343	343	224	244	249	222	234	242	140	140	144	196	200	200	115	115	NA	187	197	197	363	363	365	336	364	372	346	346	NA	191	191	201	173	173	175	220	222	226	154	168	168
2023-PLATE-113_2022-2355_106-Pressure_9500PSI_R1_106	9500 PSI	275	275	283	148	152	164	327	343	343	NA	NA	NA	206	238	242	140	140	144	188	200	208	103	103	115	193	193	197	359	363	363	344	372	372	346	352	360	191	201	201	173	173	175	220	222	222	154	154	156
2023-PLATE-113_2022-2355_107-Pressure_9500PSI_R1_107	9500 PSI	267	275	275	124	148	164	315	319	339	224	244	244	238	242	246	140	140	144	192	196	224	115	115	NA	187	195	195	359	359	NA	336	344	352	346	352	360	191	197	197	173	173	NA	220	220	222	156	156	168
2023-PLATE-113_2022-2355_108-Pressure_9500PSI_R1_108	9500 PSI	275	275	283	148	152	164	327	327	343	NA	NA	NA	206	234	238	140	140	NA	188	200	208	103	115	115	187	187	193	359	363	365	336	344	372	346	352	360	197	197	201	173	173	175	222	222	NA	154	154	168
2023-PLATE-113_2022-2355_109-Pressure_9500PSI_R1_109	9500 PSI	275	275	283	148	152	164	319	343	343	224	244	249	222	234	234	140	140	NA	196	200	200	115	115	NA	187	195	197	359	359	363	336	364	372	346	346	NA	191	197	201	173	173	NA	220	222	226	154	168	168
2023-PLATE-113_2022-2355_110-Pressure_9500PSI_R1_110	9500 PSI	267	275	275	124	148	164	327	343	343	NA	NA	NA	206	238	242	140	140	144	188	196	200	103	103	115	187	187	193	363	365	365	336	344	372	360	360	NA	191	197	201	173	173	175	220	222	222	154	154	156
2023-PLATE-113_2022-2355_111-Pressure_9500PSI_R1_111	9500 PSI	275	275	283	124	148	164	315	319	339	224	244	244	238	242	246	140	140	144	192	208	224	103	115	115	193	195	197	359	359	NA	344	352	372	346	352	360	191	197	201	173	173	175	220	220	222	156	156	168
2023-PLATE-113_2022-2355_112-Pressure_9500PSI_R1_112	9500 PSI	275	279	283	124	148	164	319	343	343	224	244	249	234	234	242	140	140	144	200	200	208	115	115	NA	195	197	197	359	363	365	364	372	372	346	346	NA	191	191	201	173	173	175	220	222	226	154	168	168
2023-PLATE-113_2022-2355_113-Pressure_9500PSI_R1_113	9500 PSI	267	275	279	124	164	164	319	343	343	224	244	249	222	234	234	140	140	144	200	200	208	115	115	NA	187	195	197	359	359	363	336	364	372	346	346	360	191	191	201	173	173	NA	220	222	226	154	168	168
2023-PLATE-113_2022-2355_114-Pressure_9500PSI_R1_114	9500 PSI	267	275	275	124	148	164	315	319	339	224	244	244	234	238	246	140	140	NA	192	196	224	103	115	115	187	193	195	359	359	NA	336	344	352	346	346	360	197	197	201	173	173	175	220	220	222	156	156	168
2023-PLATE-113_2022-2355_115-Pressure_9500PSI_R1_115	9500 PSI	267	275	275	124	148	164	343	343	NA	224	244	249	222	234	234	140	140	144	196	200	200	103	115	115	187	197	197	359	363	363	336	364	372	346	346	NA	191	191	201	173	173	NA	220	222	226	154	168	168
2023-PLATE-113_2022-2355_116-Pressure_9500PSI_R1_116	9500 PSI	275	275	283	124	148	164	315	319	339	224	244	244	238	242	246	140	140	144	192	196	224	115	115	NA	195	195	197	359	359	365	344	352	372	346	352	360	191	197	201	173	173	NA	220	220	222	156	156	NA
2023-PLATE-113_2022-2355_117-Pressure_9500PSI_R1_117	9500 PSI	267	275	275	124	148	164	319	327	343	NA	NA	NA	206	234	238	140	140	NA	188	188	196	103	115	115	187	187	193	359	363	363	336	344	372	360	360	NA	197	197	201	173	173	175	220	222	222	154	154	168
2023-PLATE-113_2022-2355_118-Pressure_9500PSI_R1_118	9500 PSI	267	275	275	124	148	164	315	339	343	224	244	244	234	238	246	140	140	144	192	196	224	103	115	115	187	193	195	359	359	NA	336	344	352	346	352	360	191	197	201	173	173	175	220	220	222	156	156	168
2023-PLATE-113_2022-2355_119-Pressure_9500PSI_R1_119	9500 PSI	275	275	283	124	148	164	327	343	343	224	224	NA	206	238	242	140	140	NA	188	200	208	103	115	115	187	193	197	359	365	365	344	372	372	346	352	360	197	197	201	173	173	175	222	222	NA	154	154	168
2023-PLATE-113_2022-2355_120-Pressure_9500PSI_R1_120	9500 PSI	267	275	275	148	152	164	343	343	NA	224	244	249	222	234	234	140	140	NA	196	200	200	103	115	115	195	195	197	359	359	365	364	372	372	346	346	NA	191	197	201	173	173	175	NA	NA	NA	156	168	168
2023-PLATE-113_2022-2355_121-Pressure_9500PSI_R1_121	9500 PSI	275	275	283	124	148	164	327	343	343	NA	NA	NA	206	234	238	140	140	NA	188	188	196	103	103	115	187	193	197	363	365	365	344	372	372	352	352	360	197	197	201	173	175	175	220	222	222	154	154	156
2023-PLATE-113_2022-2355_122-Pressure_9500PSI_R1_122	9500 PSI	275	275	283	148	152	164	319	327	327	NA	NA	NA	206	234	238	140	140	144	188	196	200	115	115	NA	187	193	197	359	363	365	344	372	372	352	360	360	191	197	201	175	175	NA	220	222	222	154	154	156
2023-PLATE-113_2022-2355_123-Pressure_9500PSI_R1_123	9500 PSI	275	279	283	124	148	164	343	343	NA	224	244	249	222	234	234	140	140	144	196	200	200	115	115	NA	195	197	197	359	363	365	364	372	372	346	346	360	191	191	201	173	173	NA	220	222	226	154	154	168
2023-PLATE-113_2022-2355_124-Pressure_9500PSI_R1_124	9500 PSI	267	275	275	148	152	164	315	319	339	224	244	244	238	242	246	140	140	144	192	208	224	115	115	NA	187	193	193	359	359	NA	336	344	352	346	346	352	191	197	201	173	173	NA	220	220	222	156	156	NA
2023-PLATE-113_2022-2355_125-Pressure_9500PSI_R1_125	9500 PSI	267	275	275	148	152	164	319	327	343	NA	NA	NA	206	234	238	140	140	NA	188	196	200	115	115	NA	187	193	197	359	363	365	344	372	372	352	360	360	197	197	201	173	173	175	220	222	222	154	154	156
2023-PLATE-113_2022-2355_126-Pressure_9500PSI_R2_001	9500 PSI	267	275	279	148	152	164	343	343	NA	224	244	249	222	234	242	140	140	NA	196	200	200	115	115	NA	195	197	197	359	363	365	364	372	372	346	346	NA	197	201	201	173	173	NA	220	222	226	154	156	168
2023-PLATE-113_2022-2355_127-Pressure_9500PSI_R2_002	9500 PSI	267	275	275	124	148	164	315	319	339	224	244	244	238	242	246	140	140	NA	192	208	224	115	115	NA	193	195	197	359	359	365	344	352	372	346	346	352	197	197	201	173	173	NA	220	220	222	156	156	168
2023-PLATE-113_2022-2355_128-Pressure_9500PSI_R2_003	9500 PSI	267	275	279	148	152	164	319	343	343	224	244	249	222	234	234	140	140	144	196	200	200	103	115	115	197	197	NA	363	363	365	364	372	372	346	346	NA	191	191	201	173	173	NA	222	226	226	154	156	168
2023-PLATE-113_2022-2355_129-Pressure_9500PSI_R2_004	9500 PSI	275	275	283	124	148	164	319	343	343	224	244	249	222	234	242	140	140	144	200	200	208	103	115	115	195	197	197	359	363	365	364	372	372	346	346	NA	191	191	201	173	173	175	220	222	226	154	156	168
2023-PLATE-113_2022-2355_130-Pressure_9500PSI_R2_005	9500 PSI	275	275	283	124	148	164	319	327	343	NA	NA	NA	206	234	238	140	140	NA	188	196	200	103	103	115	187	187	NA	365	365	NA	336	344	372	352	360	360	197	197	201	173	175	175	220	222	222	154	154	168
2023-PLATE-113_2022-2355_131-Pressure_9500PSI_R2_006	9500 PSI	267	275	275	148	152	164	319	327	343	NA	NA	NA	206	238	242	140	140	NA	188	200	208	NA	NA	NA	187	187	193	359	363	365	336	344	372	352	360	360	197	197	NA	173	173	NA	220	220	222	154	154	168
2023-PLATE-113_2022-2355_132-Pressure_9500PSI_R2_007	9500 PSI	267	275	275	148	152	164	319	327	343	224	224	NA	206	238	242	140	140	144	196	200	200	103	115	115	187	193	197	363	365	365	344	372	372	346	352	352	191	197	201	173	175	175	220	222	222	154	154	156
2023-PLATE-113_2022-2355_39-Pressure_9500PSI_R1_039	9500 PSI	275	275	283	124	148	164	315	319	339	224	244	244	238	242	246	140	140	NA	208	224	224	103	115	115	187	193	195	359	359	NA	336	344	352	346	352	360	197	197	201	173	173	175	220	220	222	156	156	168
2023-PLATE-113_2022-2355_40-Pressure_9500PSI_R1_040	9500 PSI	275	275	283	124	148	164	327	343	343	224	224	NA	238	238	242	140	140	NA	188	196	200	103	103	115	187	193	197	363	365	365	344	372	372	346	352	352	197	201	201	173	175	175	220	222	222	154	154	168
2023-PLATE-113_2022-2355_41-Pressure_9500PSI_R1_041	9500 PSI	279	279	283	124	148	164	343	343	NA	224	244	249	222	222	242	140	140	NA	200	200	208	115	115	NA	187	195	197	359	359	363	336	364	372	346	346	NA	191	197	201	173	173	NA	220	222	226	154	156	168
2023-PLATE-113_2022-2355_42-Pressure_9500PSI_R1_042	9500 PSI	275	275	283	124	148	164	315	339	343	224	244	244	234	238	246	140	140	144	192	196	224	115	115	NA	193	193	197	359	359	365	344	352	372	346	352	360	191	197	201	173	173	NA	220	220	222	156	156	168
2023-PLATE-113_2022-2355_43-Pressure_9500PSI_R1_043	9500 PSI	267	275	275	124	148	164	327	343	343	NA	NA	NA	206	238	242	140	140	144	188	200	208	103	115	115	187	187	193	359	363	365	336	344	372	346	352	360	191	197	201	173	175	175	220	220	222	154	154	156
2023-PLATE-113_2022-2355_44-Pressure_9500PSI_R1_044	9500 PSI	279	279	283	124	148	164	319	343	343	224	244	249	222	222	234	140	140	NA	196	200	200	103	115	115	187	197	197	359	363	363	336	364	372	346	346	NA	191	197	201	173	173	175	220	222	226	154	154	168
2023-PLATE-113_2022-2355_45-Pressure_9500PSI_R1_045	9500 PSI	275	275	283	148	152	164	315	339	343	224	244	244	234	238	246	140	140	144	192	196	224	115	115	NA	187	193	195	359	359	NA	336	344	352	346	352	360	191	197	201	173	173	NA	220	220	222	156	156	NA
2023-PLATE-113_2022-2355_46-Pressure_9500PSI_R1_046	9500 PSI	275	275	283	148	152	164	315	339	343	224	244	244	234	238	246	140	140	144	192	208	224	115	115	NA	187	195	195	359	359	NA	336	344	352	346	346	360	191	197	201	173	173	NA	220	220	222	156	156	168
2023-PLATE-113_2022-2355_47-Pressure_9500PSI_R1_047	9500 PSI	267	275	275	148	152	164	315	339	343	224	244	244	234	238	246	140	140	NA	192	196	224	103	115	115	187	193	195	359	359	NA	336	344	352	346	346	352	197	197	201	173	173	175	220	220	222	156	156	NA
2023-PLATE-113_2022-2355_48-Pressure_9500PSI_R1_048	9500 PSI	267	275	275	124	148	164	315	339	343	224	244	244	234	238	246	140	140	144	192	196	224	115	115	NA	187	193	193	359	359	NA	336	344	352	346	352	360	191	201	201	173	173	NA	220	220	222	156	156	NA
2023-PLATE-113_2022-2355_49-Pressure_9500PSI_R1_049	9500 PSI	275	279	283	148	152	164	343	343	NA	224	244	249	222	234	234	140	140	144	196	200	200	115	115	NA	187	195	195	359	359	NA	336	372	372	346	346	NA	191	191	201	173	173	175	222	226	226	154	156	168
2023-PLATE-113_2022-2355_50-Pressure_9500PSI_R1_050	9500 PSI	267	275	275	148	152	164	315	319	339	224	244	244	234	238	246	140	140	144	192	196	224	115	115	NA	187	193	195	359	359	NA	336	344	352	346	346	352	191	197	201	173	173	175	220	220	222	156	156	168
2023-PLATE-113_2022-2355_51-Pressure_9500PSI_R1_051	9500 PSI	275	275	283	124	148	148	327	343	343	224	224	NA	206	234	238	140	140	NA	188	196	200	103	115	115	187	187	NA	365	365	NA	336	344	372	346	360	360	197	197	201	173	173	NA	220	220	222	154	154	168
2023-PLATE-113_2022-2355_52-Pressure_9500PSI_R1_052	9500 PSI	275	279	283	124	148	164	327	343	343	NA	NA	NA	206	234	238	140	140	144	188	200	208	103	115	115	187	193	197	365	365	NA	344	372	372	352	360	360	191	197	201	175	175	NA	220	222	222	154	154	156
2023-PLATE-113_2022-2355_53-Pressure_9500PSI_R1_053	9500 PSI	267	275	279	124	148	164	319	343	343	224	244	249	222	234	234	140	140	NA	200	200	208	103	115	115	187	195	197	359	359	363	336	364	372	346	346	NA	191	197	201	173	173	NA	220	222	226	154	168	168
2023-PLATE-113_2022-2355_54-Pressure_9500PSI_R1_054	9500 PSI	275	275	283	148	152	164	319	327	343	224	224	NA	206	238	242	140	140	NA	188	196	200	103	103	115	187	187	193	359	363	365	336	344	372	352	360	360	197	197	201	173	173	175	220	222	222	154	154	168
2023-PLATE-113_2022-2355_55-Pressure_9500PSI_R1_055	9500 PSI	NA	NA	NA	NA	NA	NA	NA	NA	NA	NA	NA	NA	NA	NA	NA	NA	NA	NA	NA	NA	NA	NA	NA	NA	NA	NA	NA	NA	NA	NA	NA	NA	NA	NA	NA	NA	NA	NA	NA	NA	NA	NA	NA	NA	NA	NA	NA	NA
2023-PLATE-113_2022-2355_56-Pressure_9500PSI_R1_056	9500 PSI	275	275	283	124	148	164	315	319	339	224	244	244	238	242	246	140	140	NA	192	208	224	115	115	NA	193	195	197	359	359	365	344	352	372	346	346	352	197	197	201	173	173	175	220	220	222	156	156	NA
2023-PLATE-113_2022-2355_57-Pressure_9500PSI_R1_057	9500 PSI	275	279	283	148	152	164	343	343	NA	224	244	249	222	234	234	140	140	144	196	200	200	115	115	NA	187	195	197	359	359	NA	336	364	372	346	346	360	191	191	201	173	173	175	220	222	226	154	168	168
2023-PLATE-113_2022-2355_58-Pressure_9500PSI_R1_058	9500 PSI	275	275	283	148	152	164	315	339	343	224	244	244	238	242	246	140	140	NA	192	208	224	103	115	115	195	195	197	359	359	365	344	352	372	346	346	352	197	197	201	173	173	NA	220	220	222	156	156	168
2023-PLATE-113_2022-2355_59-Pressure_9500PSI_R1_059	9500 PSI	267	275	275	148	152	164	319	327	343	NA	NA	NA	206	206	234	140	140	144	188	196	200	103	115	115	187	193	197	363	365	365	344	372	372	360	360	NA	191	201	201	173	175	175	220	222	222	154	154	156
2023-PLATE-113_2022-2355_60-Pressure_9500PSI_R1_060	9500 PSI	267	275	279	124	148	164	343	343	NA	224	244	249	222	234	242	140	140	NA	200	200	208	103	115	115	195	197	197	359	363	363	364	372	372	346	346	360	191	197	201	173	173	NA	220	222	226	154	156	168
2023-PLATE-113_2022-2355_61-Pressure_9500PSI_R1_061	9500 PSI	275	275	283	148	152	164	315	339	343	224	244	244	238	242	246	140	140	NA	192	192	208	103	115	115	193	195	197	359	359	365	344	352	372	346	352	360	197	197	201	173	173	NA	220	220	222	156	156	NA
2023-PLATE-113_2022-2355_62-Pressure_9500PSI_R1_062	9500 PSI	275	275	283	124	148	164	319	327	343	NA	NA	NA	206	206	242	140	140	NA	188	196	200	103	115	115	187	187	193	359	363	365	336	344	372	346	352	360	197	197	201	173	175	175	220	220	222	154	154	156
2023-PLATE-113_2022-2355_63-Pressure_9500PSI_R1_063	9500 PSI	267	275	275	124	148	164	319	327	343	NA	NA	NA	206	238	242	140	140	144	188	200	208	103	115	115	187	187	193	359	363	363	336	344	372	346	352	360	191	197	201	173	173	175	220	222	222	154	154	168
2023-PLATE-113_2022-2355_64-Pressure_9500PSI_R1_064	9500 PSI	275	275	283	148	152	164	315	339	343	224	244	244	238	242	246	140	140	144	192	208	224	103	115	115	193	195	197	359	359	NA	344	352	372	346	352	360	191	197	201	173	173	175	220	220	222	156	156	NA
2023-PLATE-113_2022-2355_65-Pressure_9500PSI_R1_065	9500 PSI	267	275	275	124	148	164	327	343	343	NA	NA	NA	206	238	242	140	140	144	188	196	200	103	115	115	187	187	NA	359	365	365	336	344	372	352	360	360	191	201	201	175	175	NA	220	222	222	154	154	156
2023-PLATE-113_2022-2355_66-Pressure_9500PSI_R1_066	9500 PSI	267	275	275	148	152	164	315	339	343	224	244	244	238	242	246	140	140	NA	192	196	224	103	115	115	193	195	197	359	359	365	344	352	372	346	346	352	197	197	201	173	173	NA	220	220	222	156	156	168
2023-PLATE-113_2022-2355_67-Pressure_9500PSI_R1_067	9500 PSI	275	275	283	124	148	164	327	343	343	NA	NA	NA	206	234	238	140	140	NA	188	196	200	103	115	115	187	187	193	359	363	363	336	344	372	346	352	360	197	197	201	173	175	175	220	222	222	154	154	168
2023-PLATE-113_2022-2355_68-Pressure_9500PSI_R1_068	9500 PSI	267	279	279	124	148	164	343	343	NA	224	244	244	222	234	234	140	140	144	196	200	200	103	115	115	195	197	197	359	363	365	364	372	372	346	346	360	191	191	201	173	173	175	220	222	226	154	156	168
2023-PLATE-113_2022-2355_69-Pressure_9500PSI_R1_069	9500 PSI	267	275	275	124	148	164	315	339	343	224	244	244	234	238	246	140	140	144	192	208	224	103	115	115	193	195	197	359	359	365	344	352	372	346	346	352	191	197	201	173	173	175	220	220	222	156	156	NA
2023-PLATE-113_2022-2355_70-Pressure_9500PSI_R1_070	9500 PSI	275	275	283	124	148	164	319	327	343	NA	NA	NA	206	238	242	140	140	144	188	196	200	103	103	115	187	193	197	363	365	365	344	372	372	360	360	NA	191	197	201	173	175	175	220	222	222	154	154	168
2023-PLATE-113_2022-2355_71-Pressure_9500PSI_R1_071	9500 PSI	275	279	283	148	152	164	319	343	343	224	244	249	222	234	242	140	140	144	196	200	200	103	115	115	195	197	197	359	363	365	364	372	372	346	346	360	191	191	201	173	173	NA	220	222	226	154	156	168
2023-PLATE-113_2022-2355_72-Pressure_9500PSI_R1_072	9500 PSI	279	279	283	148	152	164	343	343	NA	224	244	249	222	234	234	140	140	NA	200	200	208	103	115	115	195	197	197	359	363	365	364	372	372	346	346	360	191	197	201	173	173	175	220	222	226	154	156	168
2023-PLATE-113_2022-2355_73-Pressure_9500PSI_R1_073	9500 PSI	275	275	283	124	148	164	319	343	343	224	244	249	222	234	242	140	140	144	200	200	208	103	115	115	187	195	197	359	359	363	336	364	372	346	346	360	191	191	201	173	173	175	220	222	226	154	154	168
2023-PLATE-113_2022-2355_74-Pressure_9500PSI_R1_074	9500 PSI	275	275	283	124	148	164	343	343	NA	224	244	249	234	234	242	140	140	NA	196	200	200	115	115	NA	187	195	197	359	359	363	336	364	372	346	346	360	191	197	201	173	173	NA	220	222	226	168	168	NA
2023-PLATE-113_2022-2355_75-Pressure_9500PSI_R1_075	9500 PSI	267	275	275	148	152	164	319	327	343	NA	NA	NA	206	238	242	140	140	144	188	196	200	103	115	115	187	193	197	365	365	NA	344	372	372	352	360	360	191	197	201	175	175	NA	220	222	222	154	154	156
2023-PLATE-113_2022-2355_76-Pressure_9500PSI_R1_076	9500 PSI	267	275	275	124	148	164	315	339	343	224	244	244	238	242	246	140	140	NA	192	208	224	115	115	NA	195	195	197	NA	NA	NA	344	352	372	346	352	360	197	197	201	NA	NA	NA	220	220	222	156	156	168
2023-PLATE-113_2022-2355_77-Pressure_9500PSI_R1_077	9500 PSI	267	275	275	148	152	164	319	339	339	224	244	244	234	238	246	140	140	144	192	208	224	103	115	115	193	195	197	359	359	365	344	352	372	346	352	360	191	197	201	173	173	NA	220	220	222	156	156	NA
2023-PLATE-113_2022-2355_78-Pressure_9500PSI_R1_078	9500 PSI	267	275	279	124	148	164	319	343	343	224	244	249	222	234	234	140	140	144	196	200	200	103	115	115	195	197	197	359	359	363	364	372	372	346	346	NA	191	191	201	173	173	NA	220	222	226	154	156	168
2023-PLATE-113_2022-2355_79-Pressure_9500PSI_R1_079	9500 PSI	275	275	283	124	148	164	315	319	339	224	244	244	234	238	246	140	140	NA	192	196	224	103	115	115	187	193	195	359	359	NA	336	344	352	346	346	352	197	197	201	173	173	175	220	220	222	156	156	NA
2023-PLATE-113_2022-2355_80-Pressure_9500PSI_R1_080	9500 PSI	275	275	283	124	148	164	343	343	NA	224	244	249	222	234	234	140	140	NA	196	200	200	103	115	115	195	197	197	359	363	365	364	372	372	346	346	NA	191	197	201	173	173	175	220	222	226	156	168	168
2023-PLATE-113_2022-2355_81-Pressure_9500PSI_R1_081	9500 PSI	275	275	283	148	152	164	327	343	343	NA	NA	NA	206	234	238	140	140	NA	188	196	200	103	115	115	187	193	193	359	363	363	336	344	372	346	352	352	197	197	201	173	173	NA	220	222	222	154	154	156
2023-PLATE-113_2022-2355_82-Pressure_9500PSI_R1_082	9500 PSI	275	275	283	124	148	164	315	339	343	224	244	244	238	242	246	140	140	144	192	196	224	103	115	115	187	193	195	359	359	365	336	344	352	346	352	360	191	197	201	173	173	NA	220	220	222	156	156	168
2023-PLATE-113_2022-2355_83-Pressure_9500PSI_R1_083	9500 PSI	267	275	279	148	152	164	319	343	343	224	244	249	222	234	242	140	140	NA	200	200	208	103	115	115	187	195	197	359	359	363	336	364	372	346	346	360	191	197	201	173	173	175	220	222	226	154	156	168
2023-PLATE-113_2022-2355_84-Pressure_9500PSI_R1_084	9500 PSI	267	275	275	148	152	164	327	343	343	224	224	NA	206	238	242	140	140	NA	188	200	208	103	103	115	187	193	197	363	365	365	344	372	372	346	360	360	197	197	201	173	173	175	220	220	222	154	154	168
2023-PLATE-113_2022-2355_85-Pressure_9500PSI_R1_085	9500 PSI	267	275	275	148	152	164	319	343	343	224	224	NA	234	238	238	140	140	144	188	196	200	103	103	115	187	193	197	363	365	365	344	372	372	346	352	360	191	197	201	173	173	175	222	222	NA	154	154	168
2023-PLATE-113_2022-2355_86-Pressure_9500PSI_R1_086	9500 PSI	267	275	275	148	152	164	327	343	343	224	224	NA	206	234	238	140	140	NA	188	196	200	103	103	NA	193	193	197	363	363	365	344	372	372	346	360	360	197	197	201	173	175	175	220	222	222	154	154	156
2023-PLATE-113_2022-2355_87-Pressure_9500PSI_R1_087	9500 PSI	267	275	275	124	148	164	327	343	343	224	224	NA	206	238	242	140	140	NA	188	200	208	115	115	NA	187	187	193	363	365	365	336	344	372	352	360	360	197	197	201	173	173	175	220	222	222	154	154	156
2023-PLATE-113_2022-2355_88-Pressure_9500PSI_R1_088	9500 PSI	267	279	279	124	148	148	319	343	343	224	244	249	222	234	242	140	140	144	196	200	200	103	115	115	187	195	197	359	359	363	336	364	372	346	346	360	191	191	201	173	173	175	220	220	NA	154	168	168
2023-PLATE-113_2022-2355_89-Pressure_9500PSI_R1_089	9500 PSI	267	275	275	124	148	164	319	327	343	NA	NA	NA	206	234	238	140	140	NA	188	188	196	103	103	115	187	187	197	365	365	NA	344	372	372	352	360	360	197	197	201	173	173	175	220	220	222	154	154	168
2023-PLATE-113_2022-2355_90-Pressure_9500PSI_R1_090	9500 PSI	275	275	283	148	152	164	315	339	343	224	244	244	234	238	246	140	140	144	192	196	224	115	115	NA	193	195	197	359	359	365	344	352	372	346	352	360	191	197	201	173	173	NA	220	220	222	156	156	NA
2023-PLATE-113_2022-2355_91-Pressure_9500PSI_R1_091	9500 PSI	275	275	283	124	148	164	319	343	343	224	244	249	222	234	242	140	140	144	200	200	208	103	115	115	195	197	197	359	363	365	364	372	372	346	346	NA	191	191	201	173	173	175	220	222	226	156	168	168
2023-PLATE-113_2022-2355_92-Pressure_9500PSI_R1_092	9500 PSI	267	275	275	148	152	164	315	319	339	224	244	244	234	238	246	140	140	NA	192	196	224	103	115	115	193	195	197	359	359	365	344	352	372	346	346	352	197	197	201	173	173	NA	220	220	222	156	156	NA
2023-PLATE-113_2022-2355_93-Pressure_9500PSI_R1_093	9500 PSI	275	275	283	124	148	164	319	327	343	224	224	NA	234	238	238	140	140	NA	188	200	208	103	115	115	187	187	193	363	365	365	336	344	372	346	360	360	197	197	201	173	175	175	220	222	222	154	154	156
2023-PLATE-113_2022-2355_94-Pressure_9500PSI_R1_094	9500 PSI	267	275	275	124	148	164	315	339	343	224	244	244	234	238	246	140	140	NA	192	208	224	115	115	NA	193	195	197	359	359	NA	344	352	372	346	346	360	197	197	201	173	173	175	220	220	222	156	156	168
2023-PLATE-113_2022-2355_95-Pressure_9500PSI_R1_095	9500 PSI	275	275	283	124	148	164	327	327	343	224	224	NA	206	238	242	140	140	NA	188	196	200	103	115	115	187	193	197	359	363	363	344	372	372	360	360	NA	197	197	201	175	175	NA	222	222	NA	154	154	156
2023-PLATE-113_2022-2355_96-Pressure_9500PSI_R1_096	9500 PSI	275	275	283	124	148	164	315	339	343	224	244	244	234	238	246	140	140	NA	192	208	224	115	115	NA	193	195	197	359	359	NA	344	352	372	346	346	352	197	197	201	173	173	175	220	220	222	156	156	NA
2023-PLATE-113_2022-2355_97-Pressure_9500PSI_R1_097	9500 PSI	267	275	275	124	148	164	315	339	343	224	244	244	234	238	246	140	140	144	192	208	224	115	115	NA	193	195	197	359	359	365	344	352	372	346	346	352	191	197	201	173	173	175	220	220	222	156	156	168
2023-PLATE-113_2022-2355_98-Pressure_9500PSI_R1_098	9500 PSI	275	275	283	124	148	164	327	343	343	NA	NA	NA	206	234	238	140	140	NA	188	200	208	103	115	115	187	187	193	363	365	365	336	344	372	346	352	360	197	197	201	175	175	NA	220	222	222	154	154	156
2023-PLATE-113_2022-2355_99-Pressure_9500PSI_R1_099	9500 PSI	267	275	275	124	148	164	319	343	343	224	244	249	222	234	234	140	140	NA	200	200	208	103	115	115	187	195	197	359	359	363	336	364	372	346	346	NA	191	197	201	173	173	175	220	222	226	154	154	168
2023-PLATE-114_2022-2355_133-Pressure_9500PSI_R2_008	9500 PSI	275	275	283	124	164	164	315	315	319	224	244	244	238	242	246	140	140	NA	192	196	224	103	115	115	187	195	195	359	359	365	336	344	352	346	346	352	197	197	NA	173	173	175	220	220	222	156	156	168
2023-PLATE-114_2022-2355_134-Pressure_9500PSI_R2_009	9500 PSI	275	279	283	124	148	164	343	343	NA	224	244	249	NA	NA	NA	140	140	144	NA	NA	NA	NA	NA	NA	NA	NA	NA	NA	NA	NA	NA	NA	NA	NA	NA	NA	NA	NA	NA	NA	NA	NA	NA	NA	NA	NA	NA	NA
2023-PLATE-114_2022-2355_135-Pressure_9500PSI_R2_010	9500 PSI	275	279	283	124	148	164	319	343	343	224	244	249	234	234	242	140	140	NA	196	200	200	103	115	115	187	197	197	359	363	363	336	364	372	346	346	NA	191	191	197	173	173	NA	220	222	226	154	156	168
2023-PLATE-114_2022-2355_136-Pressure_9500PSI_R2_011	9500 PSI	275	275	283	148	152	164	315	319	339	224	244	244	238	242	246	140	140	NA	192	196	224	103	115	115	193	195	197	359	359	365	344	352	372	346	346	352	197	197	201	173	173	NA	220	220	222	156	156	168
2023-PLATE-114_2022-2355_137-Pressure_9500PSI_R2_012	9500 PSI	267	275	275	124	148	164	315	319	339	224	244	244	238	242	246	140	140	144	192	196	224	103	115	115	193	195	197	359	359	365	344	352	372	346	352	360	191	201	201	173	173	NA	220	220	222	156	156	NA
2023-PLATE-114_2022-2355_138-Pressure_9500PSI_R2_013	9500 PSI	267	275	275	124	148	164	315	339	343	224	244	244	234	246	246	140	140	NA	192	192	208	103	115	115	187	195	195	359	359	NA	336	344	352	346	346	352	197	201	201	173	173	175	220	220	222	156	156	NA
2023-PLATE-114_2022-2355_139-Pressure_9500PSI_R2_014	9500 PSI	275	275	283	148	148	152	319	327	343	NA	NA	NA	206	234	238	140	140	144	188	196	200	103	115	115	187	193	197	359	363	365	344	372	372	352	360	360	191	197	201	175	175	NA	220	222	222	154	154	156
2023-PLATE-114_2022-2355_140-Pressure_9500PSI_R2_015	9500 PSI	279	279	283	124	148	164	319	343	343	224	244	249	222	234	234	140	140	NA	200	200	208	115	115	NA	195	197	197	359	363	365	364	372	372	346	346	360	191	197	201	173	173	NA	220	222	226	154	168	168
2023-PLATE-114_2022-2355_141-Pressure_9500PSI_R2_016	9500 PSI	267	275	275	124	148	164	319	343	343	224	244	249	222	234	234	140	140	NA	200	200	208	103	115	115	187	195	197	359	359	363	336	364	372	346	346	NA	191	197	201	173	173	175	220	222	226	154	168	168
2023-PLATE-114_2022-2355_142-Pressure_9500PSI_R2_017	9500 PSI	267	275	275	148	152	164	315	339	343	224	244	244	238	242	246	140	140	NA	192	208	224	115	115	NA	193	195	197	359	359	365	344	352	372	346	352	360	197	197	201	173	173	NA	220	220	222	156	156	168
2023-PLATE-114_2022-2355_143-Pressure_9500PSI_R2_018	9500 PSI	267	275	275	148	152	164	319	327	343	224	224	NA	206	234	238	140	140	NA	188	196	200	103	115	115	187	193	197	363	365	365	344	372	372	360	360	NA	197	197	201	173	173	175	220	222	222	154	154	168
2023-PLATE-114_2022-2355_144-Pressure_9500PSI_R2_019	9500 PSI	267	275	275	124	148	164	315	339	343	224	244	244	234	238	246	140	140	144	192	196	224	103	115	115	187	193	195	359	359	NA	336	344	352	346	346	352	191	197	201	173	173	NA	220	220	222	156	156	NA
2023-PLATE-114_2022-2355_145-Pressure_9500PSI_R2_020	9500 PSI	275	279	283	148	152	164	343	343	NA	224	244	249	234	234	242	140	140	NA	200	200	208	NA	NA	NA	187	195	197	359	359	363	336	364	372	346	346	360	191	197	201	173	173	NA	220	222	226	154	168	168
2023-PLATE-114_2022-2355_146-Pressure_9500PSI_R2_021	9500 PSI	267	275	275	148	152	164	315	339	343	224	244	244	234	238	246	140	140	NA	192	192	196	115	115	NA	187	193	193	359	359	NA	336	344	352	346	346	352	197	197	201	173	173	NA	220	220	222	156	156	NA
2023-PLATE-114_2022-2355_147-Pressure_9500PSI_R2_022	9500 PSI	267	275	279	148	152	164	343	343	NA	224	244	249	222	234	242	140	140	144	196	200	200	115	115	NA	187	195	197	359	363	365	336	364	372	346	346	NA	191	191	201	173	173	NA	220	220	222	156	168	168
2023-PLATE-114_2022-2355_148-Pressure_9500PSI_R2_023	9500 PSI	275	275	283	148	152	164	315	319	339	224	244	244	238	242	246	140	140	NA	192	196	224	103	115	115	187	193	195	359	359	365	336	344	352	346	346	NA	197	197	201	173	173	NA	220	220	222	156	156	168
2023-PLATE-114_2022-2355_149-Pressure_9500PSI_R2_024	9500 PSI	267	275	275	124	148	164	315	319	339	224	244	244	234	238	246	140	140	144	192	196	224	115	115	NA	187	193	195	359	359	NA	336	344	352	346	346	352	191	197	201	173	173	175	220	220	222	156	156	NA
2023-PLATE-114_2022-2355_150-Pressure_9500PSI_R2_025	9500 PSI	275	275	283	148	152	164	327	327	343	NA	NA	NA	206	206	234	140	140	144	188	196	200	103	115	115	187	193	197	359	363	365	344	372	372	346	352	360	191	197	201	173	173	175	220	222	222	154	154	156
2023-PLATE-114_2022-2355_151-Pressure_9500PSI_R2_026	9500 PSI	275	275	283	148	152	164	315	319	339	224	244	244	234	238	246	140	140	NA	192	196	224	103	115	115	193	193	197	359	359	365	344	344	372	346	352	352	197	197	NA	173	173	NA	220	220	222	156	156	168
2023-PLATE-114_2022-2355_152-Pressure_9500PSI_R2_027	9500 PSI	267	275	275	124	148	164	315	319	339	224	244	244	234	238	246	140	140	NA	192	208	224	103	115	115	187	193	195	359	359	NA	336	344	352	346	346	352	197	197	201	173	173	NA	220	220	222	156	156	NA
2023-PLATE-114_2022-2355_153-Pressure_9500PSI_R2_028	9500 PSI	275	275	283	124	148	164	319	343	343	224	244	249	222	234	234	140	140	NA	196	200	200	115	115	NA	187	195	195	359	359	NA	336	364	372	346	346	NA	191	197	201	173	173	175	220	222	226	156	168	168
2023-PLATE-114_2022-2355_154-Pressure_9500PSI_R2_029	9500 PSI	275	279	283	124	148	164	319	343	343	224	244	249	222	234	234	140	140	144	196	200	200	103	115	115	187	195	197	359	359	363	336	364	372	346	346	360	191	191	201	173	173	175	220	222	226	154	168	168
2023-PLATE-114_2022-2355_155-Pressure_9500PSI_R2_030	9500 PSI	275	275	283	148	152	164	315	319	339	224	244	244	238	242	246	140	140	144	192	208	224	115	115	NA	187	193	193	359	359	NA	336	344	352	346	346	352	191	197	201	173	173	NA	220	220	222	156	156	NA
2023-PLATE-114_2022-2355_156-Pressure_9500PSI_R2_031	9500 PSI	267	275	275	124	148	164	319	327	327	NA	NA	NA	206	238	242	140	140	144	188	196	200	103	103	115	187	193	193	363	363	365	336	344	372	346	352	360	191	197	201	173	173	175	220	222	222	154	154	156
2023-PLATE-114_2022-2355_157-Pressure_9500PSI_R2_032	9500 PSI	267	275	275	124	148	164	327	343	343	224	224	NA	206	234	238	140	140	144	188	196	200	103	103	115	187	187	193	363	365	365	336	344	372	346	352	352	191	197	197	173	173	NA	220	222	222	154	154	168
2023-PLATE-114_2022-2355_158-Pressure_9500PSI_R2_033	9500 PSI	275	275	283	148	152	164	319	327	343	224	224	NA	206	238	242	140	140	144	200	200	208	103	103	115	187	193	197	359	363	365	344	372	372	346	352	360	191	201	201	173	173	175	222	222	NA	154	154	156
2023-PLATE-114_2022-2355_159-Pressure_9500PSI_R2_034	9500 PSI	275	275	283	148	152	164	343	343	NA	224	244	249	222	234	234	140	140	144	200	200	208	115	115	NA	187	195	197	359	359	363	336	364	372	346	346	360	191	191	201	173	173	NA	220	222	226	154	156	168
2023-PLATE-114_2022-2355_160-Pressure_9500PSI_R2_035	9500 PSI	275	275	283	124	148	164	315	339	343	224	244	244	234	238	246	140	140	144	192	196	224	115	115	NA	187	193	195	359	359	NA	336	344	352	352	352	360	191	197	201	173	173	175	220	220	222	156	156	168
2023-PLATE-114_2022-2355_161-Pressure_9500PSI_R2_036	9500 PSI	267	275	275	124	148	164	315	319	339	224	244	244	238	242	246	140	140	144	192	208	224	115	115	NA	187	193	195	359	359	NA	336	344	352	346	346	352	191	197	201	173	173	NA	220	220	222	156	156	NA
2023-PLATE-114_2022-2355_162-Pressure_9500PSI_R2_037	9500 PSI	275	279	283	152	164	164	343	343	NA	224	244	249	222	234	242	140	140	NA	200	200	208	103	115	115	197	197	NA	363	363	365	364	372	372	346	346	NA	191	191	197	173	173	NA	220	220	222	168	168	NA
2023-PLATE-114_2022-2355_163-Pressure_9500PSI_R2_038	9500 PSI	275	279	283	148	152	164	319	343	343	224	244	249	222	234	234	140	140	NA	196	200	200	103	115	115	197	197	NA	359	363	363	364	364	372	346	346	360	191	197	201	173	173	NA	220	222	226	154	154	168
2023-PLATE-114_2022-2355_164-Pressure_9500PSI_R2_039	9500 PSI	275	275	283	124	148	164	343	343	NA	NA	NA	NA	206	234	238	140	140	NA	188	196	200	103	103	NA	187	187	193	359	363	365	336	344	372	346	352	360	197	197	201	175	175	NA	220	220	222	154	154	156
2023-PLATE-114_2022-2355_165-Pressure_9500PSI_R2_040	9500 PSI	275	275	283	124	148	164	319	327	343	224	224	NA	206	234	238	140	140	NA	188	196	200	103	103	115	187	193	197	363	365	365	344	372	372	352	360	360	197	197	201	173	173	NA	220	222	222	154	154	156
2023-PLATE-114_2022-2355_166-Pressure_9500PSI_R2_041	9500 PSI	267	275	275	124	148	164	319	327	343	NA	NA	NA	234	238	238	140	140	144	200	200	208	103	115	115	187	187	193	363	365	365	336	344	372	352	360	360	191	197	201	173	175	175	220	220	222	154	154	156
2023-PLATE-114_2022-2355_167-Pressure_9500PSI_R2_042	9500 PSI	275	275	283	148	152	164	327	343	343	224	224	NA	206	234	238	140	140	144	188	200	208	115	115	NA	187	187	NA	359	365	365	336	372	372	352	360	360	191	197	201	173	173	175	220	222	222	154	154	168
2023-PLATE-114_2022-2355_168-Pressure_9500PSI_R2_043	9500 PSI	267	275	279	148	152	164	343	343	NA	224	244	249	222	234	234	140	140	NA	196	200	200	103	115	115	195	197	197	359	363	365	364	372	372	346	346	NA	191	197	201	173	173	175	220	222	226	154	168	168
2023-PLATE-114_2022-2355_169-Pressure_9500PSI_R2_044	9500 PSI	275	275	283	124	148	164	327	343	343	224	224	NA	206	238	242	140	140	144	200	200	208	103	103	115	193	193	197	363	363	365	344	372	372	346	352	360	191	197	201	173	173	NA	222	222	NA	154	154	156
2023-PLATE-114_2022-2355_170-Pressure_9500PSI_R2_045	9500 PSI	279	279	283	148	152	164	343	343	NA	224	244	249	222	238	242	140	140	144	200	200	208	103	115	115	187	197	197	363	363	365	336	364	364	346	346	360	191	191	201	173	173	NA	220	222	226	156	168	168
2023-PLATE-114_2022-2355_171-Pressure_9500PSI_R2_046	9500 PSI	267	275	275	124	148	164	319	343	343	224	224	NA	206	234	238	140	140	NA	200	200	208	103	115	115	187	193	197	363	363	365	344	372	372	346	352	360	197	197	NA	173	173	NA	220	220	222	154	154	168
2023-PLATE-114_2022-2355_172-Pressure_9500PSI_R2_047	9500 PSI	267	275	275	148	152	164	339	339	343	224	244	244	238	238	242	140	140	NA	192	208	224	103	115	115	187	193	195	359	359	NA	336	344	352	346	352	360	197	197	201	173	173	NA	220	220	222	156	156	168
2023-PLATE-114_2022-2355_173-Pressure_9500PSI_R2_048	9500 PSI	267	275	275	124	148	164	343	343	NA	224	244	249	222	234	234	140	140	NA	196	200	200	115	115	NA	195	197	197	359	363	365	364	372	372	346	346	360	191	191	197	173	173	NA	220	222	226	154	156	168
2023-PLATE-114_2022-2355_174-Pressure_9500PSI_R2_049	9500 PSI	275	275	283	148	152	164	327	343	343	224	224	NA	206	234	238	140	140	144	200	200	208	103	115	115	187	187	197	365	365	NA	344	372	372	352	360	360	191	197	201	173	175	175	220	220	222	154	154	156
2023-PLATE-114_2022-2355_175-Pressure_9500PSI_R2_050	9500 PSI	267	275	275	148	152	164	319	327	327	224	224	NA	206	234	238	140	140	144	188	196	200	103	103	115	193	193	197	363	365	365	344	372	372	346	352	360	191	197	201	173	175	175	220	222	222	154	154	156
2023-PLATE-114_2022-2355_176-Pressure_9500PSI_R2_051	9500 PSI	279	279	283	148	152	164	319	343	343	224	244	249	222	234	242	140	140	NA	196	200	200	103	115	115	195	197	197	359	359	363	364	372	372	346	346	NA	191	197	201	173	173	NA	220	222	226	154	154	156
2023-PLATE-114_2022-2355_177-Pressure_9500PSI_R2_052	9500 PSI	267	279	279	148	152	164	319	343	343	224	244	249	222	234	234	140	140	NA	200	200	208	103	115	115	195	197	197	359	363	365	364	372	372	346	346	NA	191	197	201	173	173	175	220	222	226	154	156	168
2023-PLATE-114_2022-2355_178-Pressure_9500PSI_R2_053	9500 PSI	279	279	283	124	148	164	327	343	343	NA	NA	NA	206	234	238	140	140	144	188	188	196	103	115	115	187	193	193	359	363	363	336	344	372	352	360	360	191	197	197	173	173	NA	220	222	222	154	154	156
2023-PLATE-114_2022-2355_179-Pressure_9500PSI_R2_054	9500 PSI	267	275	275	148	152	164	319	343	343	224	244	249	222	234	234	140	140	144	200	200	208	103	115	115	187	195	197	359	359	NA	336	364	372	346	346	NA	191	191	NA	173	173	NA	222	226	226	NA	NA	NA
2023-PLATE-114_2022-2355_180-Pressure_9500PSI_R2_055	9500 PSI	275	275	283	148	152	164	319	327	343	224	224	NA	206	234	238	140	140	144	188	200	208	103	115	115	187	193	197	363	365	365	344	372	372	346	352	360	191	197	201	175	175	NA	220	222	222	154	154	156
2023-PLATE-114_2022-2355_181-Pressure_9500PSI_R2_056	9500 PSI	267	275	275	124	148	164	315	339	343	224	244	244	238	242	246	140	140	144	196	224	224	115	115	NA	187	193	193	359	359	365	336	344	344	346	346	352	191	197	201	173	173	175	220	220	222	156	156	NA
2023-PLATE-114_2022-2355_182-Pressure_9500PSI_R2_057	9500 PSI	275	275	283	124	148	164	315	339	343	224	244	244	234	238	246	140	140	144	192	196	224	103	115	115	187	193	195	359	359	NA	336	344	352	346	346	352	191	197	201	173	173	NA	220	220	222	156	156	168
2023-PLATE-114_2022-2355_183-Pressure_9500PSI_R2_058	9500 PSI	267	275	275	124	148	164	327	343	343	224	224	NA	206	238	242	140	140	NA	188	200	208	103	103	115	193	193	197	363	363	365	344	372	372	352	352	360	197	197	201	173	173	175	220	222	222	154	154	168
2023-PLATE-114_2022-2355_184-Pressure_9500PSI_R2_059	9500 PSI	275	275	283	124	148	164	315	339	343	224	244	244	238	242	246	140	140	144	192	196	224	103	115	115	187	195	195	359	359	NA	336	344	352	346	346	352	191	197	201	173	173	NA	220	220	222	156	156	168
2023-PLATE-114_2022-2355_185-Pressure_9500PSI_R2_060	9500 PSI	263	275	275	124	148	164	327	343	343	224	224	NA	206	234	238	140	140	144	188	200	208	103	115	115	187	193	197	363	365	365	344	372	372	346	352	360	191	197	201	173	173	NA	222	222	NA	154	154	156
2023-PLATE-114_2022-2355_186-Pressure_9500PSI_R2_061	9500 PSI	279	279	283	124	148	164	343	343	NA	224	244	249	222	234	242	140	140	144	196	200	200	103	115	115	195	197	197	359	363	365	364	372	372	346	346	360	191	191	201	173	173	175	220	220	222	154	168	168
2023-PLATE-114_2022-2355_187-Pressure_9500PSI_R2_062	9500 PSI	267	275	275	148	152	164	319	327	343	224	224	NA	206	206	242	140	140	144	188	200	208	103	115	115	187	187	197	365	365	NA	344	372	372	346	352	352	191	197	201	173	175	175	220	222	222	154	154	156
2023-PLATE-114_2022-2355_188-Pressure_9500PSI_R2_063	9500 PSI	275	279	283	148	152	164	319	343	343	224	244	249	222	234	234	140	140	144	196	200	200	103	115	115	187	195	195	359	359	NA	336	364	372	346	346	360	191	191	NA	173	173	NA	220	222	226	154	156	168
2023-PLATE-114_2022-2355_189-Pressure_9500PSI_R2_064	9500 PSI	275	275	283	148	152	164	327	327	343	NA	NA	NA	206	234	238	140	140	NA	188	200	208	115	115	NA	187	193	193	359	363	363	336	344	372	352	360	360	197	197	201	175	175	NA	220	220	222	154	154	156
2023-PLATE-114_2022-2355_190-Pressure_9500PSI_R2_065	9500 PSI	275	275	283	148	152	164	327	343	343	224	224	NA	206	238	242	140	140	144	188	196	200	103	103	115	187	187	193	363	365	365	336	344	372	346	352	360	191	197	201	173	175	175	220	222	222	154	154	156
2023-PLATE-114_2022-2355_191-Pressure_9500PSI_R2_066	9500 PSI	275	275	283	148	152	164	315	319	339	224	244	244	234	238	246	140	140	144	192	192	196	103	115	115	187	193	193	359	359	NA	336	344	352	346	352	360	191	197	201	173	173	175	220	220	222	156	156	NA
2023-PLATE-114_2022-2355_192-Pressure_9500PSI_R2_067	9500 PSI	275	275	283	148	152	164	319	327	343	224	224	NA	206	238	242	140	140	NA	200	200	208	103	115	115	187	193	197	359	363	365	344	372	372	352	360	360	197	197	201	173	173	175	220	220	222	154	154	156
2023-PLATE-114_2022-2355_193-Pressure_9500PSI_R2_068	9500 PSI	275	279	283	148	152	164	343	343	NA	224	244	249	222	234	234	140	140	144	200	200	208	115	115	NA	195	195	197	359	359	NA	364	372	372	346	346	360	191	191	201	173	173	NA	220	220	222	154	168	168
2023-PLATE-114_2022-2355_194-Pressure_9500PSI_R2_069	9500 PSI	267	275	279	148	152	164	319	343	343	224	244	249	234	234	NA	140	140	144	200	200	208	115	115	NA	187	195	197	359	359	363	336	364	372	346	346	NA	191	191	201	173	173	NA	220	222	226	154	156	168
2023-PLATE-114_2022-2355_195-Pressure_9500PSI_R2_070	9500 PSI	267	275	275	148	152	164	315	339	343	224	244	244	238	242	246	140	140	NA	192	208	224	103	115	115	187	193	195	359	359	NA	336	344	352	346	352	360	197	197	201	173	173	NA	220	220	222	156	156	NA
2023-PLATE-114_2022-2355_196-Pressure_9500PSI_R2_071	9500 PSI	267	275	275	124	148	164	315	319	339	224	244	244	234	238	238	140	140	144	192	196	224	115	115	NA	193	195	197	359	359	365	344	352	372	346	346	352	191	197	201	173	173	NA	220	220	222	156	156	NA
2023-PLATE-114_2022-2355_197-Pressure_9500PSI_R2_072	9500 PSI	275	275	283	148	152	164	315	319	339	224	244	244	238	242	246	140	140	NA	192	192	208	103	115	115	187	193	195	359	359	NA	336	344	352	346	346	352	197	197	201	173	173	175	220	220	222	156	156	NA
2023-PLATE-114_2022-2355_198-Pressure_9500PSI_R2_073	9500 PSI	275	279	283	148	152	164	319	343	343	224	244	249	222	234	242	140	140	144	196	200	200	103	115	115	187	195	197	359	359	363	336	364	372	346	346	360	191	191	201	173	173	175	220	222	226	154	168	168
2023-PLATE-114_2022-2355_199-Pressure_9500PSI_R2_074	9500 PSI	275	275	283	148	152	164	319	327	327	224	224	NA	206	238	242	140	140	144	188	200	208	103	103	115	187	187	197	365	365	NA	372	372	NA	346	352	360	191	197	201	173	175	175	220	222	222	154	154	168
2023-PLATE-114_2022-2355_200-Pressure_9500PSI_R2_075	9500 PSI	275	275	283	148	152	164	315	319	339	224	244	244	234	238	246	140	140	NA	192	208	224	115	115	NA	193	195	197	359	359	NA	344	352	372	346	346	352	197	197	201	173	173	175	220	220	222	156	156	168
2023-PLATE-114_2022-2355_201-Pressure_9500PSI_R2_076	9500 PSI	275	275	283	148	152	164	315	319	339	224	244	244	242	246	246	140	140	144	192	196	224	103	115	115	193	195	197	359	359	365	344	352	372	346	352	360	191	197	201	173	173	175	220	220	222	156	156	NA
2023-PLATE-114_2022-2355_202-Pressure_9500PSI_R2_077	9500 PSI	267	275	275	148	152	164	319	327	343	224	224	NA	206	234	238	140	140	144	188	200	208	103	103	115	187	187	193	359	365	365	336	344	372	346	352	360	191	197	197	173	173	175	220	222	222	154	154	168
2023-PLATE-114_2022-2355_203-Pressure_9500PSI_R2_078	9500 PSI	275	275	283	148	152	164	339	339	343	224	244	244	238	242	246	140	140	144	192	208	224	103	115	115	187	193	193	359	359	NA	336	344	352	346	346	352	191	197	201	173	173	175	220	220	222	156	156	NA
2023-PLATE-114_2022-2355_204-Pressure_9500PSI_R2_079	9500 PSI	267	275	275	152	164	164	319	343	343	224	244	249	222	234	242	140	140	NA	196	200	200	103	115	115	195	197	197	359	363	365	364	372	372	346	346	NA	191	197	201	173	173	175	220	222	226	154	168	168
2023-PLATE-114_2022-2355_205-Pressure_9500PSI_R2_080	9500 PSI	267	279	279	148	152	164	319	343	343	224	244	249	222	234	242	140	140	NA	196	200	200	103	115	115	195	195	197	359	359	NA	364	372	372	346	346	360	191	191	197	173	173	175	220	222	226	154	154	156
2023-PLATE-114_2022-2355_206-Pressure_9500PSI_R2_081	9500 PSI	267	279	279	148	152	164	343	343	NA	224	244	249	222	234	242	140	140	NA	196	200	200	115	115	NA	187	195	197	359	359	363	336	364	372	346	346	360	191	197	201	173	173	NA	220	222	226	154	156	168
2023-PLATE-114_2022-2355_207-Pressure_9500PSI_R2_082	9500 PSI	267	275	275	124	148	164	315	339	343	224	244	244	234	238	246	140	140	144	192	196	224	103	115	115	193	195	197	359	359	365	344	352	372	346	346	360	191	197	201	173	173	175	220	220	222	156	156	168
2023-PLATE-114_2022-2355_208-Pressure_9500PSI_R2_083	9500 PSI	275	275	283	124	148	164	315	319	339	224	244	244	234	238	246	140	140	144	192	208	224	115	115	NA	187	193	195	359	359	365	336	344	352	346	346	352	191	197	201	173	173	NA	220	220	222	156	156	168
2023-PLATE-114_2022-2355_209-Pressure_9500PSI_R2_084	9500 PSI	267	275	275	148	152	164	339	339	343	224	244	244	238	242	246	140	140	NA	192	208	224	103	115	115	187	193	195	359	359	NA	336	344	352	346	346	352	197	197	201	173	173	NA	220	220	222	156	156	168
2023-PLATE-114_2022-2355_210-Pressure_9500PSI_R2_085	9500 PSI	275	275	283	124	148	148	319	343	343	224	224	NA	206	206	234	140	140	NA	188	200	208	103	103	115	193	193	197	363	363	365	344	372	372	346	360	360	197	197	201	173	173	175	220	220	222	154	154	168
2023-PLATE-114_2022-2355_211-Pressure_9500PSI_R2_086	9500 PSI	267	279	279	148	152	164	319	343	343	224	244	249	222	234	234	140	140	NA	200	200	208	115	115	NA	187	197	197	359	363	363	336	364	364	346	346	NA	191	197	201	173	173	NA	220	222	226	154	168	168
2023-PLATE-114_2022-2355_212-Pressure_9500PSI_R2_087	9500 PSI	275	275	283	148	152	164	315	339	343	224	244	244	234	238	246	140	140	NA	192	196	224	103	115	115	187	193	195	359	359	NA	336	344	352	346	352	360	197	197	201	173	173	NA	220	220	222	156	156	168
2023-PLATE-114_2022-2355_213-Pressure_9500PSI_R2_088	9500 PSI	267	275	275	148	152	164	315	339	343	224	244	244	238	242	246	140	140	NA	192	208	224	103	115	115	187	193	195	359	359	NA	336	344	352	346	352	360	197	201	201	173	173	175	220	220	222	156	156	168
2023-PLATE-114_2022-2355_214-Pressure_9500PSI_R2_089	9500 PSI	275	275	283	124	148	164	327	343	343	NA	NA	NA	206	234	238	140	140	NA	188	196	200	115	115	NA	187	193	197	359	363	363	344	372	372	346	352	360	197	197	201	173	173	175	220	222	222	154	154	168
2023-PLATE-114_2022-2355_215-Pressure_9500PSI_R2_090	9500 PSI	267	275	275	124	148	164	327	327	343	224	224	NA	206	234	238	140	140	144	188	200	208	103	103	115	193	193	197	363	363	365	344	372	372	346	352	360	191	197	201	173	175	175	220	220	222	154	154	168
2023-PLATE-114_2022-2355_216-Pressure_9500PSI_R2_091	9500 PSI	267	275	275	124	148	164	319	327	343	NA	NA	NA	206	234	238	140	140	NA	188	196	200	103	103	115	187	193	197	363	365	365	344	372	372	346	352	360	197	197	201	173	173	175	222	222	NA	154	154	156
2023-PLATE-114_2022-2355_217-Pressure_9500PSI_R2_092	9500 PSI	267	279	279	148	152	164	319	343	343	224	244	249	222	234	242	140	140	NA	200	200	208	115	115	NA	195	197	197	359	363	365	364	372	372	346	346	NA	191	197	201	173	173	175	220	222	226	154	168	168
2023-PLATE-114_2022-2355_218-Pressure_9500PSI_R2_093	9500 PSI	NA	NA	NA	148	152	164	319	343	343	224	244	249	222	234	234	140	140	144	200	200	208	115	115	NA	195	197	197	359	359	363	364	372	372	346	346	360	191	191	201	173	173	175	220	222	226	168	168	NA
2023-PLATE-114_2022-2355_219-Pressure_9500PSI_R2_094	9500 PSI	267	275	275	148	152	164	327	343	343	224	224	NA	206	234	238	140	140	NA	188	196	200	115	115	NA	187	187	193	359	363	365	336	344	372	346	352	360	197	197	201	175	175	NA	220	222	222	154	154	156
2023-PLATE-114_2022-2355_220-Pressure_9500PSI_R2_095	9500 PSI	267	275	279	124	148	164	339	343	343	224	244	249	222	234	242	140	140	NA	196	200	200	103	115	115	187	195	197	359	363	365	336	364	364	346	346	360	191	197	201	173	173	175	222	226	226	154	156	168
2023-PLATE-114_2022-2355_221-Pressure_9500PSI_R2_096	9500 PSI	267	275	279	148	152	164	319	343	343	224	244	249	222	234	242	140	140	NA	200	200	208	103	115	115	187	195	197	359	359	363	336	364	372	346	346	NA	197	201	201	173	173	NA	220	222	226	154	168	168
2023-PLATE-114_2022-2355_222-Pressure_9500PSI_R2_097	9500 PSI	267	275	275	124	148	164	319	327	327	224	224	NA	206	238	242	140	140	144	188	196	200	103	103	115	193	193	197	359	363	363	344	372	372	346	352	360	191	197	201	175	175	NA	220	222	222	154	154	168
2023-PLATE-114_2022-2355_223-Pressure_9500PSI_R2_098	9500 PSI	267	279	279	124	148	164	319	343	343	224	244	249	222	234	234	140	140	NA	196	200	200	115	115	NA	195	195	197	359	359	NA	364	372	372	346	346	NA	191	197	201	173	173	175	220	222	226	154	156	168
2023-PLATE-114_2022-2355_224-Pressure_9500PSI_R2_099	9500 PSI	267	275	275	124	148	164	327	343	343	224	224	NA	206	238	242	140	140	NA	188	196	200	115	115	NA	187	193	197	359	363	365	344	372	372	346	352	360	197	197	201	173	173	NA	220	222	222	154	154	168
2023-PLATE-114_2022-2355_225-Pressure_9500PSI_R2_100	9500 PSI	275	275	283	148	152	164	315	339	343	224	244	244	242	246	246	140	140	144	192	196	224	115	115	NA	187	193	195	359	359	365	336	344	352	346	346	352	191	201	201	173	173	NA	220	220	222	156	156	168
2023-PLATE-114_2022-2355_226-Pressure_9500PSI_R2_101	9500 PSI	275	275	283	124	148	164	319	343	343	224	244	249	222	234	234	140	140	NA	200	200	208	115	115	NA	187	195	197	359	363	365	336	364	372	346	346	NA	191	197	201	173	173	NA	220	222	226	154	156	168
2023-PLATE-181_2022-2355_227-Pressure_9500PSI_R2_102	9500 PSI	275	275	283	148	152	164	315	319	339	224	244	244	NA	NA	NA	140	140	144	192	208	224	115	115	NA	195	195	197	359	359	365	344	352	372	346	346	352	191	197	201	173	173	NA	220	220	222	156	156	168
2023-PLATE-181_2022-2355_228-Pressure_9500PSI_R2_103	9500 PSI	267	275	275	124	148	164	343	343	NA	224	224	NA	206	206	234	140	140	144	188	196	200	103	115	115	193	193	197	363	363	365	344	344	372	352	360	360	191	197	201	173	173	175	220	220	222	154	154	156
2023-PLATE-181_2022-2355_229-Pressure_9500PSI_R2_104	9500 PSI	267	275	279	148	152	164	319	343	343	224	244	249	222	234	234	140	140	144	196	200	200	103	115	115	195	197	197	359	359	363	364	372	372	346	346	360	191	191	201	173	173	175	220	220	222	154	168	168
2023-PLATE-181_2022-2355_230-Pressure_9500PSI_R2_105	9500 PSI	267	275	275	148	152	164	315	339	343	224	244	244	234	238	246	140	140	NA	192	208	224	115	115	NA	187	193	195	359	359	365	336	344	352	346	352	360	197	197	201	173	173	NA	220	220	222	156	156	168
2023-PLATE-181_2022-2355_231-Pressure_9500PSI_R2_106	9500 PSI	275	275	283	148	152	164	315	339	343	224	244	244	238	242	246	140	140	144	192	196	224	115	115	NA	193	193	197	359	359	365	344	352	372	346	352	360	191	197	201	173	173	175	220	220	222	156	156	NA
2023-PLATE-181_2022-2355_232-Pressure_9500PSI_R2_107	9500 PSI	267	275	275	124	148	164	327	343	343	NA	NA	NA	206	234	238	140	140	NA	188	200	208	103	115	NA	NA	NA	NA	359	363	363	336	344	372	360	360	NA	197	197	201	NA	NA	NA	220	222	222	154	156	NA
2023-PLATE-181_2022-2355_233-Pressure_9500PSI_R2_108	9500 PSI	275	275	283	124	148	164	343	343	NA	224	224	NA	206	238	242	140	140	144	196	200	200	103	115	115	187	193	197	363	365	365	344	372	372	346	352	352	191	197	201	173	173	175	220	220	222	154	154	168
2023-PLATE-181_2022-2355_234-Pressure_9500PSI_R2_109	9500 PSI	267	275	275	148	148	152	343	343	NA	NA	NA	NA	206	234	238	140	140	NA	188	200	208	115	115	NA	187	187	193	359	363	365	336	344	372	346	352	360	197	197	201	173	173	NA	220	220	222	154	154	156
2023-PLATE-181_2022-2355_235-Pressure_9500PSI_R2_110	9500 PSI	275	275	283	148	152	164	319	343	343	224	224	NA	206	238	242	140	140	NA	188	200	208	103	103	115	187	193	193	363	363	365	336	344	372	352	360	360	197	197	NA	173	175	175	222	222	NA	154	154	156
2023-PLATE-181_2022-2355_236-Pressure_9500PSI_R2_111	9500 PSI	267	275	275	124	148	164	315	319	339	224	244	244	234	238	246	140	140	NA	192	208	224	103	115	115	193	195	197	359	359	NA	344	352	372	346	346	352	197	197	201	173	173	NA	220	220	222	156	156	NA
2023-PLATE-181_2022-2355_237-Pressure_9500PSI_R2_112	9500 PSI	267	275	279	148	152	164	319	343	343	224	244	249	222	234	242	140	140	NA	196	200	200	103	115	115	195	197	197	359	363	365	364	372	372	346	346	NA	191	197	201	173	173	175	220	222	226	168	168	NA
2023-PLATE-181_2022-2355_238-Pressure_9500PSI_R2_113	9500 PSI	275	275	283	148	152	164	327	343	343	NA	NA	NA	206	238	242	140	140	144	188	200	208	103	115	115	187	187	193	359	363	365	336	344	372	346	352	360	191	197	201	173	173	NA	220	222	222	154	154	168
2023-PLATE-181_2022-2355_239-Pressure_9500PSI_R2_114	9500 PSI	279	279	283	148	152	164	319	343	343	224	244	249	234	234	242	140	140	NA	200	200	208	115	115	NA	187	195	195	359	359	NA	336	372	372	346	346	360	191	197	201	173	173	175	220	222	226	154	168	168
2023-PLATE-181_2022-2355_240-Pressure_9500PSI_R2_115	9500 PSI	267	275	275	124	148	164	315	339	343	224	244	244	234	238	246	140	140	NA	192	196	224	115	115	NA	187	193	193	359	359	NA	336	344	352	346	346	352	197	197	201	173	173	NA	220	220	222	156	156	168
2023-PLATE-181_2022-2355_241-Pressure_9500PSI_R2_116	9500 PSI	275	275	283	148	152	164	315	339	343	NA	NA	NA	234	238	246	140	140	144	196	224	224	115	115	NA	187	193	193	359	359	NA	336	344	352	346	352	360	191	197	201	173	173	175	220	220	222	156	156	168
2023-PLATE-181_2022-2355_242-Pressure_9500PSI_R2_117	9500 PSI	267	275	279	148	152	164	319	343	343	224	244	249	222	234	238	140	140	144	196	200	200	103	115	115	197	197	NA	363	363	365	364	372	372	346	346	360	191	201	201	173	173	NA	220	222	226	154	154	156
2023-PLATE-181_2022-2355_243-Pressure_9500PSI_R2_118	9500 PSI	279	279	283	148	152	164	343	343	NA	224	244	249	222	234	242	140	140	NA	196	200	200	115	115	NA	195	197	197	359	363	365	364	372	372	346	346	360	191	197	201	173	173	NA	222	226	226	154	154	168
2023-PLATE-181_2022-2355_244-Pressure_9500PSI_R2_119	9500 PSI	275	275	283	148	152	164	319	327	343	NA	NA	NA	206	234	238	140	140	144	196	200	200	103	115	115	187	187	NA	359	365	365	336	344	372	352	360	360	191	197	197	173	173	NA	220	222	222	154	154	168
2023-PLATE-181_2022-2355_245-Pressure_9500PSI_R2_120	9500 PSI	267	275	275	124	148	164	315	339	343	224	244	244	238	242	246	140	140	144	208	224	224	103	115	115	187	193	195	359	359	NA	336	344	352	346	346	360	191	201	201	173	173	175	220	220	222	156	156	168
2023-PLATE-181_2022-2355_246-Pressure_9500PSI_R2_121	9500 PSI	267	275	275	148	152	164	319	327	343	NA	NA	NA	234	238	238	140	140	NA	188	196	200	103	115	115	187	187	197	365	365	NA	344	372	372	352	360	360	197	197	201	175	175	NA	220	222	222	154	154	168
2023-PLATE-181_2022-2355_247-Pressure_9500PSI_R2_122	9500 PSI	267	275	275	124	148	164	327	343	347	NA	NA	NA	206	238	242	140	140	144	188	200	208	103	115	115	187	193	197	363	365	365	344	372	372	346	360	360	191	197	201	173	173	NA	222	222	NA	154	154	156
2023-PLATE-181_2022-2355_248-Pressure_9500PSI_R2_123	9500 PSI	275	275	283	148	152	164	315	319	339	224	244	244	242	246	246	140	140	NA	192	196	224	115	115	NA	187	193	195	359	359	365	336	344	352	346	346	360	197	197	201	173	173	NA	220	220	222	156	156	NA
2023-PLATE-181_2022-2355_249-Pressure_9500PSI_R2_124	9500 PSI	267	279	279	148	152	164	319	343	343	224	244	249	222	234	234	140	140	NA	200	200	208	103	115	115	195	197	197	359	363	365	364	372	372	346	346	NA	191	197	201	173	173	175	220	222	226	154	154	168
2023-PLATE-181_2022-2355_250-Pressure_9500PSI_R2_125	9500 PSI	267	275	275	124	148	164	319	343	343	224	244	249	222	234	242	140	140	NA	196	200	200	103	115	115	187	195	197	359	359	363	336	364	372	346	346	360	191	197	201	173	173	175	222	226	226	154	156	168
[truncated: 12 more columns]

## Sheet: Experiment 2_eggs
Sample_Name	treatment	SSsp2210_allele1	SSsp2210_allele2	SSsp2210_allele3	SsaD157_allele1	SsaD157_allele2	SsaD157_allele3	Sp1605_allele1	Sp1605_allele2	Sp1605_allele3	Sp2216_allele1	Sp2216_allele2	Sp2216_allele3	Ssa14_allele1	Ssa14_allele2	Ssa14_allele3	Ssa197_allele1	Ssa197_allele2	Ssa197_allele3	SsaF43_allele1	SsaF43_allele2	SsaF43_allele3	SsOsl85_allele1	SsOsl85_allele2	SsOsl85_allele3	EST107_allele1	EST107_allele2	EST107_allele3	EST19_allele1	EST19_allele2	EST19_allele3	EST28_allele1	EST28_allele2	EST28_allele3	EST68_allele1	EST68_allele2	EST68_allele3	Sleel53_allele1	Sleel53_allele2	Sleel53_allele3	Sleen82_allele1	Sleen82_allele2	Sleen82_allele3	SsOSL25_allele1	SsOSL25_allele2	SsOSL25_allele3	SsSP2215_allele1	SsSP2215_allele2	SsSP2215_allele3
2022-PLATE-69_2022-137_1-2N_Fam1_01	0 PSI	NA	NA	NA	NA	NA	NA	NA	NA	NA	NA	NA	NA	140	140	NA	196	200	NA	103	115	NA	187	195	NA	359	359	NA	336	372	NA	346	360	NA	191	197	NA	173	173	NA	220	222	NA	168	168	NA	109	125	NA
2022-PLATE-69_2022-137_10-2N_Fam1_10	0 PSI	148	152	NA	343	343	NA	NA	NA	NA	NA	NA	NA	140	144	NA	200	208	NA	103	115	NA	187	195	NA	359	365	NA	336	372	NA	346	360	NA	191	201	NA	173	175	NA	220	222	NA	156	168	NA	113	125	NA
2022-PLATE-69_2022-137_11-2N_Fam1_11	0 PSI	152	164	NA	319	343	NA	NA	NA	NA	NA	NA	NA	140	144	NA	196	200	NA	115	115	NA	195	197	NA	359	359	NA	372	372	NA	346	346	NA	191	201	NA	173	175	NA	220	222	NA	168	168	NA	109	125	NA
2022-PLATE-69_2022-137_12-2N_Fam1_12	0 PSI	148	152	NA	343	343	NA	NA	NA	NA	NA	NA	NA	140	144	NA	196	200	NA	103	115	NA	187	195	NA	359	359	NA	336	372	NA	346	346	NA	191	201	NA	173	175	NA	222	226	NA	156	168	NA	109	125	NA
2022-PLATE-69_2022-137_13-2N_Fam1_13	0 PSI	124	148	NA	319	343	NA	NA	NA	NA	NA	NA	NA	140	140	NA	200	208	NA	115	115	NA	197	197	NA	363	365	NA	364	372	NA	346	360	NA	191	197	NA	173	175	NA	220	222	NA	168	168	NA	109	125	NA
2022-PLATE-69_2022-137_14-2N_Fam1_14	0 PSI	152	164	NA	319	343	NA	NA	NA	NA	NA	NA	NA	140	140	NA	196	200	NA	103	115	NA	197	197	NA	363	365	NA	364	372	NA	346	360	NA	191	197	NA	173	173	NA	222	226	NA	156	168	NA	109	125	NA
2022-PLATE-69_2022-137_15-2N_Fam1_15	0 PSI	152	164	NA	319	343	NA	NA	NA	NA	NA	NA	NA	140	144	NA	196	200	NA	115	115	NA	195	197	NA	359	365	NA	372	372	NA	346	346	NA	191	201	NA	173	175	NA	222	226	NA	154	156	NA	113	125	NA
2022-PLATE-69_2022-137_16-2N_Fam1_16	0 PSI	124	164	NA	319	343	NA	NA	NA	NA	NA	NA	NA	NA	NA	NA	200	208	NA	115	115	NA	197	197	NA	359	365	NA	364	372	NA	346	346	NA	191	201	NA	173	175	NA	220	222	NA	154	168	NA	109	125	NA
2022-PLATE-69_2022-137_17-2N_Fam1_17	0 PSI	NA	NA	NA	343	343	NA	NA	NA	NA	NA	NA	NA	140	144	NA	196	200	NA	103	115	NA	195	197	NA	359	365	NA	364	372	NA	346	346	NA	191	191	NA	173	173	NA	222	226	NA	156	168	NA	113	125	NA
2022-PLATE-69_2022-137_18-2N_Fam1_18	0 PSI	148	152	NA	343	343	NA	NA	NA	NA	NA	NA	NA	140	140	NA	200	208	NA	115	115	NA	187	195	NA	359	359	NA	336	372	NA	346	360	NA	191	197	NA	173	175	NA	220	222	NA	154	156	NA	113	125	NA
2022-PLATE-69_2022-137_19-2N_Fam1_19	0 PSI	124	164	NA	343	343	NA	NA	NA	NA	NA	NA	NA	140	144	NA	200	208	NA	115	115	NA	195	197	NA	359	359	NA	372	372	NA	346	346	NA	191	191	NA	173	175	NA	220	222	NA	168	168	NA	109	125	NA
2022-PLATE-69_2022-137_2-2N_Fam1_02	0 PSI	152	164	NA	319	343	NA	NA	NA	NA	NA	NA	NA	140	140	NA	200	208	NA	103	115	NA	197	197	NA	363	365	NA	372	372	NA	346	346	NA	197	201	NA	173	173	NA	220	222	NA	154	168	NA	109	125	NA
2022-PLATE-69_2022-137_20-2N_Fam1_20	0 PSI	NA	NA	NA	319	343	NA	NA	NA	NA	NA	NA	NA	140	144	NA	200	208	NA	103	115	NA	197	197	NA	363	365	NA	372	372	NA	346	346	NA	191	191	NA	173	173	NA	222	226	NA	154	156	NA	113	125	NA
2022-PLATE-69_2022-137_21-2N_Fam2_01	0 PSI	148	152	NA	327	343	NA	224	224	NA	NA	NA	NA	140	140	NA	196	200	NA	103	115	NA	187	187	NA	359	365	NA	336	372	NA	346	360	NA	197	197	NA	173	175	NA	220	222	NA	154	168	NA	109	117	NA
2022-PLATE-69_2022-137_22-2N_Fam2_02	0 PSI	NA	NA	NA	343	343	NA	224	224	NA	NA	NA	NA	140	144	NA	188	208	NA	115	115	NA	187	197	NA	365	365	NA	372	372	NA	346	352	NA	191	197	NA	173	175	NA	222	222	NA	154	156	NA	113	117	NA
2022-PLATE-69_2022-137_23-2N_Fam2_03	0 PSI	152	164	NA	319	343	NA	224	224	NA	NA	NA	NA	140	144	NA	200	208	NA	103	115	NA	187	193	NA	359	365	NA	336	344	NA	360	360	NA	191	197	NA	173	175	NA	220	222	NA	154	156	NA	113	125	NA
2022-PLATE-69_2022-137_24-2N_Fam2_04	0 PSI	152	164	NA	327	343	NA	224	224	NA	NA	NA	NA	140	140	NA	196	200	NA	103	115	NA	187	187	NA	365	365	NA	336	372	NA	346	360	NA	NA	NA	NA	173	175	NA	220	222	NA	154	156	NA	113	117	NA
2022-PLATE-69_2022-137_25-2N_Fam2_05	0 PSI	NA	NA	NA	319	319	327	224	224	NA	NA	NA	NA	140	140	NA	200	208	NA	103	103	NA	187	187	NA	359	365	NA	336	372	NA	352	360	NA	197	197	NA	175	175	NA	222	222	NA	154	168	NA	113	117	NA
2022-PLATE-69_2022-137_26-2N_Fam2_06	0 PSI	124	148	NA	343	343	NA	224	224	NA	NA	NA	NA	140	140	NA	188	196	NA	103	115	NA	187	197	NA	365	365	NA	372	372	NA	346	352	NA	197	201	NA	175	175	NA	222	222	NA	154	168	NA	109	125	NA
2022-PLATE-69_2022-137_27-2N_Fam2_07	0 PSI	NA	NA	NA	319	343	NA	224	224	NA	NA	NA	NA	140	144	NA	188	196	NA	103	115	NA	193	197	NA	365	365	NA	344	372	NA	352	360	NA	191	197	NA	175	175	NA	222	222	NA	154	168	NA	109	125	NA
2022-PLATE-69_2022-137_28-2N_Fam2_08	0 PSI	NA	NA	NA	343	343	NA	224	224	NA	NA	NA	NA	140	144	NA	188	196	NA	115	115	NA	187	193	NA	359	363	NA	336	344	NA	346	352	NA	191	201	NA	175	175	NA	220	222	NA	154	168	NA	109	125	NA
2022-PLATE-69_2022-137_29-2N_Fam2_09	0 PSI	152	164	NA	319	343	NA	224	224	NA	NA	NA	NA	140	144	NA	188	196	NA	103	115	NA	193	197	NA	359	363	NA	344	372	NA	346	352	NA	191	197	NA	173	175	NA	220	222	NA	154	168	NA	109	125	NA
2022-PLATE-69_2022-137_3-2N_Fam1_03	0 PSI	124	164	NA	319	343	NA	NA	NA	NA	NA	NA	NA	140	144	NA	196	200	NA	103	115	NA	187	197	NA	359	363	NA	336	364	NA	346	360	NA	191	201	NA	173	175	NA	222	226	NA	168	168	NA	NA	NA	NA
2022-PLATE-69_2022-137_30-2N_Fam2_10	0 PSI	148	152	NA	319	343	NA	224	224	NA	NA	NA	NA	140	140	NA	188	208	NA	103	103	NA	187	193	NA	359	363	NA	336	344	NA	360	360	NA	197	197	NA	173	175	NA	220	222	NA	154	168	NA	109	125	NA
2022-PLATE-69_2022-137_31-2N_Fam2_11	0 PSI	124	148	NA	327	343	NA	224	224	NA	NA	NA	NA	140	140	NA	188	208	NA	103	103	NA	187	193	NA	359	363	NA	336	344	NA	360	360	NA	197	201	NA	175	175	NA	220	222	NA	154	168	NA	109	117	NA
2022-PLATE-69_2022-137_32-2N_Fam2_12	0 PSI	NA	NA	NA	NA	NA	NA	224	224	NA	NA	NA	NA	140	140	NA	196	200	NA	103	103	NA	NA	NA	NA	359	363	NA	344	372	NA	352	360	NA	197	197	NA	173	175	NA	220	222	NA	154	154	168	113	117	NA
2022-PLATE-69_2022-137_33-2N_Fam2_13	0 PSI	152	164	NA	319	343	NA	224	224	NA	NA	NA	NA	140	144	NA	200	208	NA	103	103	NA	187	193	NA	359	365	NA	336	344	NA	360	360	NA	191	197	NA	175	175	NA	220	222	NA	154	168	NA	113	117	NA
2022-PLATE-69_2022-137_34-2N_Fam2_14	0 PSI	124	148	NA	327	343	NA	224	224	NA	NA	NA	NA	140	144	NA	188	208	NA	103	103	NA	187	193	NA	359	363	NA	336	344	NA	346	352	NA	191	201	NA	173	175	NA	220	222	NA	154	156	NA	109	125	NA
2022-PLATE-69_2022-137_35-2N_Fam2_15	0 PSI	124	164	NA	343	343	NA	224	224	NA	NA	NA	NA	NA	NA	NA	188	196	NA	103	115	NA	187	193	NA	359	363	NA	336	372	NA	346	352	NA	191	201	NA	173	175	NA	220	222	NA	154	168	NA	113	117	NA
2022-PLATE-69_2022-137_36-2N_Fam2_16	0 PSI	NA	NA	NA	327	327	NA	224	224	NA	NA	NA	NA	140	140	NA	188	196	NA	103	115	NA	187	193	NA	359	363	NA	336	344	NA	360	360	NA	197	201	NA	173	175	NA	222	222	NA	154	156	NA	113	117	NA
2022-PLATE-69_2022-137_37-2N_Fam2_17	0 PSI	152	152	164	343	343	NA	224	224	NA	NA	NA	NA	140	140	NA	188	208	NA	115	115	NA	187	187	NA	359	365	NA	336	372	NA	352	360	NA	197	201	NA	173	175	NA	222	222	NA	154	156	NA	109	125	NA
2022-PLATE-69_2022-137_38-2N_Fam2_18	0 PSI	148	152	152	343	343	NA	224	224	NA	NA	NA	NA	140	144	NA	200	208	NA	103	103	NA	193	197	NA	365	365	NA	344	372	NA	360	360	NA	191	197	NA	173	175	NA	220	222	NA	NA	NA	NA	113	125	NA
2022-PLATE-69_2022-137_39-2N_Fam2_19	0 PSI	NA	NA	NA	NA	NA	NA	NA	NA	NA	NA	NA	NA	NA	NA	NA	188	208	NA	103	115	NA	187	193	NA	363	365	NA	336	372	NA	346	360	NA	197	201	NA	173	175	NA	222	222	NA	154	156	NA	113	125	NA
2022-PLATE-69_2022-137_4-2N_Fam1_04	0 PSI	148	152	NA	319	343	NA	NA	NA	NA	NA	NA	NA	140	140	NA	200	208	NA	115	115	NA	195	197	NA	359	365	NA	372	372	NA	346	346	NA	191	197	NA	173	173	NA	220	222	NA	168	168	NA	113	125	NA
2022-PLATE-69_2022-137_40-2N_Fam2_20	0 PSI	124	164	NA	319	319	343	224	224	NA	NA	NA	NA	140	144	NA	200	208	NA	103	103	NA	187	187	NA	359	365	NA	336	372	NA	352	360	NA	191	201	NA	173	175	NA	220	222	NA	154	168	NA	109	125	NA
2022-PLATE-69_2022-137_41-2N_Fam3_01	0 PSI	152	152	164	NA	NA	NA	NA	NA	NA	NA	NA	NA	140	144	NA	192	208	NA	103	115	NA	187	195	NA	359	365	NA	336	352	NA	346	346	NA	191	197	NA	173	173	NA	220	222	NA	156	156	NA	113	149	NA
2022-PLATE-69_2022-137_42-2N_Fam3_02	0 PSI	NA	NA	NA	NA	NA	NA	NA	NA	NA	NA	NA	NA	140	144	NA	192	196	NA	115	115	NA	193	197	NA	359	365	NA	352	372	NA	346	360	NA	191	201	NA	173	175	NA	220	222	NA	156	156	NA	113	149	NA
2022-PLATE-69_2022-137_43-2N_Fam3_03	0 PSI	NA	NA	NA	NA	NA	NA	NA	NA	NA	NA	NA	NA	140	144	NA	208	224	NA	103	115	NA	195	197	NA	359	365	NA	352	372	NA	346	360	NA	191	201	NA	173	175	NA	220	222	NA	156	168	NA	109	125	NA
2022-PLATE-69_2022-137_44-2N_Fam3_04	0 PSI	NA	NA	NA	NA	NA	NA	NA	NA	NA	NA	NA	NA	140	140	NA	192	196	NA	115	115	NA	187	193	NA	359	359	NA	336	344	NA	352	360	NA	197	197	NA	173	173	NA	220	222	NA	156	168	NA	113	149	NA
2022-PLATE-69_2022-137_45-2N_Fam3_05	0 PSI	NA	NA	NA	NA	NA	NA	224	244	NA	NA	NA	NA	NA	NA	NA	192	208	NA	103	115	NA	187	193	NA	359	359	NA	336	352	NA	346	360	NA	191	197	NA	173	173	NA	220	222	NA	156	156	NA	113	125	NA
2022-PLATE-69_2022-137_46-2N_Fam3_06	0 PSI	148	152	NA	NA	NA	NA	NA	NA	NA	NA	NA	NA	140	144	NA	208	224	NA	115	115	NA	195	197	NA	359	365	NA	352	372	NA	346	360	NA	191	201	NA	173	173	NA	220	222	NA	156	156	NA	113	149	NA
2022-PLATE-69_2022-137_47-2N_Fam3_07	0 PSI	NA	NA	NA	NA	NA	NA	NA	NA	NA	NA	NA	NA	140	144	NA	192	196	NA	103	115	NA	187	195	NA	359	365	NA	336	352	NA	346	346	NA	191	197	NA	173	173	NA	220	222	NA	156	156	NA	113	125	NA
2022-PLATE-69_2022-137_48-2N_Fam3_08	0 PSI	124	148	NA	315	343	NA	NA	NA	NA	NA	NA	NA	140	144	NA	NA	NA	NA	103	103	115	195	197	NA	359	365	NA	344	372	NA	352	360	NA	191	197	NA	173	175	NA	220	222	NA	156	168	NA	113	149	NA
2022-PLATE-69_2022-137_49-2N_Fam3_09	0 PSI	NA	NA	NA	339	343	343	NA	NA	NA	NA	NA	NA	140	140	NA	196	224	NA	115	115	NA	195	197	NA	359	365	NA	352	372	NA	352	360	NA	197	197	NA	173	175	NA	220	222	NA	156	156	NA	113	125	NA
2022-PLATE-69_2022-137_5-2N_Fam1_05	0 PSI	148	152	NA	319	343	NA	NA	NA	NA	NA	NA	NA	140	144	NA	200	208	NA	115	115	NA	195	197	NA	359	365	NA	372	372	NA	346	360	NA	191	201	NA	173	173	NA	222	226	NA	154	156	NA	109	125	NA
2022-PLATE-69_2022-137_50-2N_Fam3_10	0 PSI	152	152	164	339	343	343	NA	NA	NA	NA	NA	NA	140	140	NA	196	224	NA	103	115	NA	187	195	NA	359	359	NA	336	352	NA	346	352	NA	197	197	NA	173	173	NA	220	222	NA	156	156	NA	113	125	NA
2022-PLATE-69_2022-137_51-2N_Fam3_11	0 PSI	NA	NA	NA	339	339	NA	NA	NA	NA	NA	NA	NA	140	140	NA	192	208	NA	115	115	NA	195	197	NA	359	365	NA	344	372	NA	346	360	NA	197	201	NA	173	173	NA	220	222	NA	156	168	NA	109	125	NA
2022-PLATE-69_2022-137_52-2N_Fam3_12	0 PSI	152	164	NA	319	339	NA	NA	NA	NA	NA	NA	NA	140	144	NA	192	196	NA	103	115	NA	195	197	NA	359	365	NA	352	372	NA	346	360	NA	191	201	NA	173	175	NA	220	222	NA	156	168	NA	109	149	NA
2022-PLATE-69_2022-137_53-2N_Fam3_13	0 PSI	124	164	NA	NA	NA	NA	NA	NA	NA	NA	NA	NA	140	140	NA	192	208	NA	103	115	NA	187	193	NA	359	359	NA	336	344	NA	352	360	NA	197	197	NA	173	175	NA	220	222	NA	156	168	NA	109	149	NA
2022-PLATE-69_2022-137_54-2N_Fam3_14	0 PSI	124	164	NA	NA	NA	NA	NA	NA	NA	NA	NA	NA	140	144	NA	208	224	NA	103	115	NA	193	197	NA	359	365	NA	344	372	NA	346	346	NA	191	197	NA	173	175	NA	220	222	NA	156	156	NA	109	149	NA
2022-PLATE-69_2022-137_55-2N_Fam3_15	0 PSI	NA	NA	NA	NA	NA	NA	NA	NA	NA	NA	NA	NA	140	140	NA	196	224	NA	103	115	NA	193	197	NA	359	365	NA	344	372	NA	352	360	NA	197	197	NA	173	173	NA	220	222	NA	156	168	NA	113	125	NA
2022-PLATE-69_2022-137_56-2N_Fam3_16	0 PSI	NA	NA	NA	NA	NA	NA	NA	NA	NA	NA	NA	NA	NA	NA	NA	208	224	NA	103	115	NA	187	195	NA	359	359	NA	336	352	NA	346	360	NA	191	201	NA	173	173	NA	220	222	NA	156	168	NA	113	149	NA
2022-PLATE-69_2022-137_57-2N_Fam3_17	0 PSI	124	148	NA	315	343	NA	NA	NA	NA	NA	NA	NA	140	144	NA	192	196	NA	115	115	NA	193	197	NA	359	359	NA	352	372	NA	352	360	NA	191	197	NA	173	175	NA	220	222	NA	156	168	NA	113	149	NA
2022-PLATE-69_2022-137_58-2N_Fam3_18	0 PSI	NA	NA	NA	NA	NA	NA	NA	NA	NA	NA	NA	NA	140	140	NA	208	224	NA	115	115	NA	187	195	NA	359	359	NA	336	352	NA	352	360	NA	197	197	NA	173	173	NA	220	222	NA	156	168	NA	113	149	NA
2022-PLATE-69_2022-137_59-2N_Fam3_19	0 PSI	NA	NA	NA	315	319	NA	NA	NA	NA	NA	NA	NA	140	144	NA	208	224	NA	115	115	NA	195	197	NA	359	365	NA	344	372	NA	346	352	NA	191	197	NA	173	173	NA	220	222	NA	156	156	NA	109	149	NA
2022-PLATE-69_2022-137_6-2N_Fam1_06	0 PSI	148	152	NA	319	343	NA	NA	NA	NA	NA	NA	NA	140	140	NA	196	200	NA	103	115	NA	197	197	NA	359	363	NA	364	372	NA	346	360	NA	197	201	NA	173	173	NA	220	222	NA	NA	NA	NA	113	125	NA
2022-PLATE-69_2022-137_60-2N_Fam3_20	0 PSI	152	164	NA	NA	NA	NA	NA	NA	NA	NA	NA	NA	140	144	NA	196	224	NA	103	115	NA	187	193	NA	359	365	NA	336	344	NA	346	360	NA	191	197	NA	173	173	NA	220	222	NA	156	156	NA	109	149	NA
2022-PLATE-69_2022-137_61-2N_Fam4_01	0 PSI	124	124	NA	NA	NA	NA	224	224	NA	NA	NA	NA	140	140	NA	NA	NA	NA	NA	NA	NA	NA	NA	NA	NA	NA	NA	336	340	NA	346	352	NA	195	197	NA	173	175	NA	220	222	NA	154	156	NA	109	113	NA
2022-PLATE-69_2022-137_62-2N_Fam4_02	0 PSI	124	124	NA	343	343	NA	NA	NA	NA	NA	NA	NA	140	144	NA	176	208	NA	115	121	NA	197	197	NA	359	365	NA	340	372	NA	NA	NA	NA	191	191	NA	173	175	NA	220	222	NA	154	156	NA	109	113	NA
2022-PLATE-69_2022-137_63-2N_Fam4_03	0 PSI	NA	NA	NA	NA	NA	NA	NA	NA	NA	NA	NA	NA	140	140	NA	188	196	NA	103	121	NA	197	197	NA	363	365	NA	364	372	NA	352	360	NA	191	197	NA	173	175	NA	220	222	NA	154	168	NA	109	109	NA
2022-PLATE-69_2022-137_64-2N_Fam4_04	0 PSI	NA	NA	NA	NA	NA	NA	NA	NA	NA	NA	NA	NA	140	144	NA	176	208	NA	115	121	NA	197	197	NA	359	359	NA	340	372	NA	352	360	NA	191	195	NA	173	173	NA	220	222	NA	NA	NA	NA	NA	NA	NA
2022-PLATE-69_2022-137_65-2N_Fam4_05	0 PSI	NA	NA	NA	315	343	NA	224	224	NA	NA	NA	NA	140	140	NA	188	196	NA	115	121	NA	187	197	NA	359	363	NA	336	364	NA	352	360	NA	191	197	NA	173	175	NA	220	222	NA	154	168	NA	109	113	NA
2022-PLATE-69_2022-137_66-2N_Fam4_06	0 PSI	148	152	NA	315	343	NA	NA	NA	NA	NA	NA	NA	140	140	NA	176	196	NA	115	121	NA	197	197	NA	359	365	NA	364	372	NA	352	360	NA	191	197	NA	173	173	NA	220	222	NA	154	168	NA	113	125	NA
2022-PLATE-69_2022-137_67-2N_Fam4_07	0 PSI	148	152	NA	NA	NA	NA	NA	NA	NA	NA	NA	NA	NA	NA	NA	188	196	NA	115	121	NA	187	197	NA	359	365	NA	336	364	NA	346	346	NA	191	197	NA	173	173	NA	220	222	NA	154	168	NA	109	125	NA
2022-PLATE-69_2022-137_68-2N_Fam4_08	0 PSI	124	124	NA	NA	NA	NA	NA	NA	NA	NA	NA	NA	140	140	NA	188	208	NA	115	121	NA	187	197	NA	359	365	NA	336	340	NA	346	352	NA	191	197	NA	173	175	NA	220	222	NA	154	156	NA	109	109	NA
2022-PLATE-69_2022-137_69-2N_Fam4_09	0 PSI	NA	NA	NA	NA	NA	NA	NA	NA	NA	NA	NA	NA	140	144	NA	176	208	NA	115	121	NA	187	197	NA	359	363	NA	336	364	NA	346	352	NA	191	195	NA	173	175	NA	220	222	NA	154	156	NA	109	113	NA
2022-PLATE-69_2022-137_7-2N_Fam1_07	0 PSI	152	164	NA	319	343	NA	NA	NA	NA	NA	NA	NA	140	144	NA	196	200	NA	103	115	NA	195	197	NA	359	365	NA	372	372	NA	346	346	NA	191	201	NA	173	175	NA	220	222	NA	154	168	NA	113	125	NA
2022-PLATE-69_2022-137_70-2N_Fam4_10	0 PSI	NA	NA	NA	NA	NA	NA	NA	NA	NA	NA	NA	NA	140	144	NA	188	196	NA	115	121	NA	187	197	NA	359	365	NA	336	364	NA	346	352	NA	191	191	NA	173	175	NA	220	222	NA	154	156	NA	109	113	NA
2022-PLATE-69_2022-137_71-2N_Fam4_11	0 PSI	NA	NA	NA	NA	NA	NA	NA	NA	NA	NA	NA	NA	140	140	NA	188	208	NA	103	121	NA	187	197	NA	359	359	NA	336	340	NA	346	352	NA	191	197	NA	173	173	NA	220	222	NA	154	168	NA	113	125	NA
2022-PLATE-69_2022-137_72-2N_Fam4_12	0 PSI	124	152	NA	343	343	NA	NA	NA	NA	NA	NA	NA	140	144	NA	188	208	NA	103	121	NA	197	197	NA	359	365	NA	340	372	NA	346	360	NA	191	195	NA	173	175	NA	220	222	NA	154	156	NA	113	125	NA
2022-PLATE-69_2022-137_73-2N_Fam4_13	0 PSI	124	152	NA	343	343	NA	NA	NA	NA	NA	NA	NA	140	140	NA	188	196	NA	115	121	NA	187	197	NA	359	359	NA	336	340	NA	346	346	NA	191	197	NA	173	175	NA	220	222	NA	154	156	NA	109	109	NA
2022-PLATE-69_2022-137_74-2N_Fam4_14	0 PSI	124	152	NA	315	319	NA	224	224	NA	NA	NA	NA	140	144	NA	176	196	NA	103	121	NA	197	197	NA	359	365	NA	340	372	NA	346	352	NA	191	191	NA	173	173	NA	220	222	NA	154	156	NA	109	125	NA
2022-PLATE-69_2022-137_75-2N_Fam4_15	0 PSI	124	124	152	315	319	NA	NA	NA	NA	NA	NA	NA	140	144	NA	188	208	NA	103	121	NA	197	197	NA	359	359	NA	340	372	NA	346	352	NA	191	195	NA	173	173	NA	220	222	NA	154	168	NA	109	109	NA
2022-PLATE-69_2022-137_76-2N_Fam4_16	0 PSI	NA	NA	NA	NA	NA	NA	NA	NA	NA	NA	NA	NA	140	144	NA	188	208	NA	115	121	NA	197	197	NA	359	365	NA	340	372	NA	346	360	NA	191	191	NA	173	173	NA	220	222	NA	NA	NA	NA	109	113	NA
2022-PLATE-69_2022-137_77-2N_Fam4_17	0 PSI	NA	NA	NA	343	343	NA	NA	NA	NA	NA	NA	NA	140	144	NA	188	196	NA	115	121	NA	197	197	NA	359	359	NA	340	372	NA	346	352	NA	191	191	NA	173	173	NA	220	222	NA	154	156	NA	109	125	NA
2022-PLATE-69_2022-137_78-2N_Fam4_18	0 PSI	124	148	NA	343	343	NA	224	224	NA	NA	NA	NA	140	144	NA	188	208	NA	103	121	NA	187	197	NA	359	363	NA	336	340	NA	346	346	NA	191	191	NA	173	175	NA	220	222	NA	154	156	NA	113	125	NA
2022-PLATE-69_2022-137_79-2N_Fam4_19	0 PSI	148	152	NA	343	343	NA	NA	NA	NA	NA	NA	NA	140	140	NA	176	196	NA	103	121	NA	197	197	NA	359	365	NA	340	372	NA	352	360	NA	195	197	NA	173	173	NA	220	222	NA	154	156	NA	113	125	NA
2022-PLATE-69_2022-137_8-2N_Fam1_08	0 PSI	124	164	NA	319	343	NA	NA	NA	NA	NA	NA	NA	NA	NA	NA	200	208	NA	115	115	NA	187	195	NA	359	359	NA	336	372	NA	346	360	NA	191	201	NA	173	173	NA	222	226	NA	154	156	NA	109	125	NA
2022-PLATE-69_2022-137_80-2N_Fam4_20	0 PSI	148	152	NA	315	343	NA	224	224	NA	NA	NA	NA	140	144	NA	176	208	NA	103	121	NA	187	197	NA	359	359	NA	336	340	NA	346	352	NA	191	195	NA	173	175	NA	220	222	NA	154	156	NA	109	113	NA
2022-PLATE-69_2022-137_81-2N_Fam5_01	0 PSI	132	152	NA	319	331	NA	224	224	NA	NA	NA	NA	144	144	NA	196	200	NA	103	115	NA	187	193	NA	359	359	NA	336	344	NA	352	360	NA	191	195	NA	173	173	NA	222	226	NA	154	156	NA	113	117	NA
2022-PLATE-69_2022-137_82-2N_Fam5_02	0 PSI	124	132	NA	331	343	NA	224	224	NA	NA	NA	NA	NA	NA	NA	NA	NA	NA	103	115	NA	NA	NA	NA	359	363	NA	336	344	NA	346	360	NA	195	197	NA	173	175	NA	220	222	NA	154	168	NA	113	117	NA
2022-PLATE-69_2022-137_83-2N_Fam5_03	0 PSI	NA	NA	NA	NA	NA	NA	224	224	NA	NA	NA	NA	144	144	NA	196	200	NA	103	115	NA	187	195	NA	359	363	NA	336	372	NA	346	352	NA	191	195	NA	173	173	NA	222	226	NA	154	156	NA	109	125	NA
2022-PLATE-69_2022-137_84-2N_Fam5_04	0 PSI	124	124	NA	NA	NA	NA	224	224	NA	NA	NA	NA	144	144	NA	196	200	NA	103	115	NA	193	197	NA	359	359	NA	344	372	NA	346	352	NA	191	195	NA	173	175	NA	220	222	NA	156	158	NA	109	125	NA
2022-PLATE-69_2022-137_85-2N_Fam5_05	0 PSI	NA	NA	NA	NA	NA	NA	224	224	NA	NA	NA	NA	144	144	NA	200	208	NA	103	103	NA	187	195	NA	359	363	NA	336	344	NA	346	360	NA	191	195	NA	173	173	NA	222	226	NA	156	158	NA	113	125	NA
2022-PLATE-69_2022-137_86-2N_Fam5_06	0 PSI	NA	NA	NA	NA	NA	NA	224	224	NA	NA	NA	NA	144	144	NA	196	200	NA	115	115	NA	195	197	NA	363	365	NA	372	372	NA	346	360	NA	191	195	NA	173	173	NA	222	226	NA	156	158	NA	113	125	NA
2022-PLATE-69_2022-137_87-2N_Fam5_07	0 PSI	124	124	NA	331	343	NA	NA	NA	NA	NA	NA	NA	NA	NA	NA	NA	NA	NA	NA	NA	NA	NA	NA	NA	359	365	NA	336	372	NA	346	360	NA	191	195	NA	173	173	NA	220	222	NA	156	158	NA	113	125	NA
2022-PLATE-69_2022-137_88-2N_Fam5_08	0 PSI	124	132	NA	331	343	NA	NA	NA	NA	NA	NA	NA	NA	NA	NA	NA	NA	NA	NA	NA	NA	NA	NA	NA	363	365	NA	372	372	NA	352	360	NA	195	197	NA	173	175	NA	222	226	NA	158	168	NA	109	117	NA
2022-PLATE-69_2022-137_89-2N_Fam5_09	0 PSI	132	152	NA	319	331	NA	NA	NA	NA	NA	NA	NA	NA	NA	NA	NA	NA	NA	NA	NA	NA	NA	NA	NA	359	365	NA	344	372	NA	346	360	NA	195	197	NA	173	175	NA	222	226	NA	154	168	NA	109	117	NA
2022-PLATE-69_2022-137_9-2N_Fam1_09	0 PSI	152	164	NA	343	343	NA	NA	NA	NA	NA	NA	NA	NA	NA	NA	200	208	NA	103	115	NA	187	197	NA	359	363	NA	336	364	NA	346	360	NA	NA	NA	NA	173	173	NA	220	222	NA	156	168	NA	113	125	NA
2022-PLATE-69_2022-137_90-2N_Fam5_10	0 PSI	NA	NA	NA	319	331	NA	224	224	NA	NA	NA	NA	144	144	NA	196	200	NA	103	103	NA	187	193	NA	359	359	NA	336	344	NA	346	352	NA	191	195	NA	173	175	NA	222	226	NA	156	158	NA	109	117	NA
2022-PLATE-69_2022-137_91-2N_Fam5_11	0 PSI	124	124	NA	NA	NA	NA	NA	NA	NA	NA	NA	NA	NA	NA	NA	196	200	NA	103	115	NA	195	197	NA	363	365	NA	372	372	NA	346	352	NA	191	195	NA	173	173	NA	222	226	NA	154	156	NA	109	125	NA
2022-PLATE-69_2022-137_92-2N_Fam5_12	0 PSI	NA	NA	NA	NA	NA	NA	224	224	NA	NA	NA	NA	144	144	NA	196	200	NA	103	115	NA	187	193	NA	359	359	NA	336	372	NA	346	346	NA	191	195	NA	173	175	NA	220	222	NA	154	156	NA	109	117	NA
2022-PLATE-69_2022-137_93-2N_Fam5_13	0 PSI	132	152	NA	331	343	NA	224	224	NA	NA	NA	NA	140	144	NA	196	200	NA	103	115	NA	187	195	NA	359	363	NA	336	372	NA	346	360	NA	195	197	NA	173	175	NA	220	222	NA	154	156	NA	109	117	NA
2022-PLATE-69_2022-137_94-2N_Fam5_14	0 PSI	NA	NA	NA	NA	NA	NA	224	224	NA	NA	NA	NA	144	144	NA	188	208	NA	115	115	NA	195	197	NA	363	365	NA	372	372	NA	346	360	NA	191	195	NA	173	173	NA	220	222	NA	NA	NA	NA	113	125	NA
2022-PLATE-74_2022-137_183-2N_Fam10_03	0 PSI	124	124	NA	339	343	NA	224	249	NA	NA	NA	NA	140	144	NA	NA	NA	NA	103	121	NA	187	187	NA	359	363	NA	336	352	NA	360	360	NA	191	201	NA	173	175	NA	220	222	NA	156	168	NA	113	153	NA
2022-PLATE-74_2022-137_182-2N_Fam10_02	0 PSI	148	152	NA	315	319	NA	224	249	NA	NA	NA	NA	144	144	NA	176	196	NA	115	121	NA	187	195	NA	359	365	NA	336	352	NA	360	360	NA	191	201	NA	173	173	NA	220	222	NA	154	156	NA	113	125	NA
2022-PLATE-74_2022-137_181-2N_Fam10_01	0 PSI	124	152	NA	319	339	NA	224	224	NA	NA	NA	NA	144	144	NA	208	224	NA	103	121	NA	187	197	NA	363	365	NA	352	372	NA	360	360	NA	191	197	NA	173	175	NA	222	222	NA	154	168	NA	113	125	NA
2022-PLATE-74_2022-137_180-2N_Fam9_20	0 PSI	124	148	NA	319	343	NA	224	224	NA	NA	NA	NA	140	144	NA	200	208	NA	103	121	NA	181	187	NA	NA	NA	NA	NA	NA	NA	NA	NA	NA	NA	NA	NA	NA	NA	NA	NA	NA	NA	NA	NA	NA	NA	NA	NA
2022-PLATE-74_2022-137_179-2N_Fam9_19	0 PSI	152	152	NA	319	343	NA	224	244	NA	NA	NA	NA	140	144	NA	200	208	NA	103	121	NA	187	197	NA	360	365	NA	344	372	NA	346	346	NA	191	201	NA	173	175	NA	220	222	NA	154	168	NA	113	125	NA
2022-PLATE-74_2022-137_178-2N_Fam9_18	0 PSI	124	152	NA	343	343	NA	224	224	NA	NA	NA	NA	140	140	NA	196	200	NA	103	121	NA	181	187	NA	359	363	NA	336	344	NA	346	360	NA	197	201	NA	173	175	NA	220	222	NA	154	168	NA	109	125	NA
2022-PLATE-74_2022-137_177-2N_Fam9_17	0 PSI	124	148	NA	319	343	NA	224	244	NA	NA	NA	NA	140	144	NA	196	200	NA	115	121	NA	187	197	NA	360	365	NA	372	372	NA	346	360	NA	191	195	NA	173	175	NA	220	222	NA	154	156	NA	113	117	NA
2022-PLATE-74_2022-137_175-2N_Fam9_15	0 PSI	124	148	NA	319	343	NA	224	224	NA	NA	NA	NA	140	144	NA	196	200	NA	103	103	NA	187	197	NA	360	365	NA	372	372	NA	346	360	NA	191	195	NA	173	175	NA	220	222	NA	154	168	NA	109	117	NA
2022-PLATE-74_2022-137_174-2N_Fam9_14	0 PSI	148	152	NA	319	343	NA	224	244	NA	NA	NA	NA	140	140	NA	196	200	NA	103	121	NA	181	187	NA	359	363	NA	336	344	NA	360	360	NA	197	201	NA	173	175	NA	220	222	NA	154	168	NA	109	117	NA
2022-PLATE-74_2022-137_173-2N_Fam9_13	0 PSI	124	148	NA	319	343	NA	224	244	NA	NA	NA	NA	140	144	NA	196	200	NA	103	115	NA	187	187	NA	359	360	NA	336	344	NA	346	360	NA	191	195	NA	173	173	NA	220	222	NA	154	156	NA	109	125	NA
2022-PLATE-74_2022-137_172-2N_Fam9_12	0 PSI	148	152	NA	343	343	NA	224	224	NA	NA	NA	NA	140	140	NA	200	208	NA	103	103	NA	181	197	NA	359	363	NA	344	372	NA	346	360	NA	195	197	NA	173	175	NA	220	222	NA	NA	NA	NA	113	125	NA
[truncated: 375 more rows]
[truncated: 9 more columns]

## Sheet: Experiment 2_parr
Sample_Name	treatment	SSsp2210_allele1	SSsp2210_allele2	SSsp2210_allele3	SsaD157_allele1	SsaD157_allele2	SsaD157_allele3	Sp1605_allele1	Sp1605_allele2	Sp1605_allele3	Sp2216_allele1	Sp2216_allele2	Sp2216_allele3	Ssa14_allele1	Ssa14_allele2	Ssa14_allele3	Ssa197_allele1	Ssa197_allele2	Ssa197_allele3	SsaF43_allele1	SsaF43_allele2	SsaF43_allele3	SsOsl85_allele1	SsOsl85_allele2	SsOsl85_allele3	EST107_allele1	EST107_allele2	EST107_allele3	EST19_allele1	EST19_allele2	EST19_allele3	EST28_allele1	EST28_allele2	EST28_allele3	EST68_allele1	EST68_allele2	EST68_allele3	Sleel53_allele1	Sleel53_allele2	Sleel53_allele3	Sleen82_allele1	Sleen82_allele2	Sleen82_allele3	SsOSL25_allele1	SsOSL25_allele2	SsOSL25_allele3	SsSP2215_allele1	SsSP2215_allele2	SsSP2215_allele3
[truncated: 2,196 more rows]
[truncated: 9 more columns]

[truncated: 1 more sheets: Parent_genotypes]
