# Supplementary material for: Chromosomal aberrations and early mortality in a non-mammalian vertebrate: example from triploid-induced Atlantic salmon
Source: Research Square preprint supplement (doi:10.21203/rs.3.rs-4180820/v1), 2024-04-09
Supplement: Supplementary file 3 [file Genotypes_summary statistics.xlsx]

## Sheet: Experiment 1_eggs
Sample_Name	family	treatment	SSsp2201_genotype	SSsp2210_genotype	SsaD157_genotype	Sp1605_genotype	Sp2216_genotype	Ssa14_genotype	Ssa197_genotype	SsaF43_genotype	SsOsl85_genotype	EST107_genotype	EST19_genotype	EST28_genotype	EST68_genotype	Sleel53_genotype	Sleen82_genotype	SsOSL25_genotype	SsSP2215_genotype	Ssa407_genotype	Ssa412_genotype	Ssleer15.1_genotype	Aberration	replicate	count_NA	count_A	count_AB	count_AAB	count_ABB	count_ABC	count_trisomic	sum	prop.trisomic	ploidy
2022-PLATE-10_2022-102_189-P2_Fam1_R1_09	Fam1	7500 PSI	AB	ABC	AB	NA	A	AB	AB	A	AB	A	AB	AB	A	AAB	ABC	AB	AB	A	A	A	NA	7500PSI.R1	1	7	9	1	0	2	3	20	0.25	Aneuploid
2022-PLATE-10_2022-102_190-P2_Fam1_R1_10	Fam1	7500 PSI	AB	AB	A	A	A	AB	AAB	AB	A	AB	AB	AB	AB	A	AB	ABB	AB	ABB	AB	A	Missing maternal 1-3 loci	7500PSI.R1	0	6	11	1	2	0	3	20	0.214286	Aneuploid
2022-PLATE-10_2022-102_191-P2_Fam1_R1_11	Fam1	7500 PSI	AB	AB	A	NA	AB	A	AB	AB	AB	AB	AB	A	AB	A	AB	AB	AB	AB	AB	A	NA	7500PSI.R1	1	5	14	0	0	0	0	20	0	Diploid
2022-PLATE-10_2022-102_192-P2_Fam1_R1_12	Fam1	7500 PSI	ABC	AB	AB	AB	ABB	AB	AB	AB	AB	A	AB	A	AB	AB	AB	AB	ABB	AB	A	AB	NA	7500PSI.R1	0	3	14	0	2	1	3	20	0.176471	Aneuploid
2022-PLATE-10_2022-102_193-P2_Fam1_R1_13	Fam1	7500 PSI	ABC	ABC	ABB	NA	ABC	NA	AAB	NA	ABC	AAB	ABC	A	AAB	A	ABC	ABB	NA	ABB	A	AAB	NA	7500PSI.R1	4	3	0	4	3	6	13	20	1	Triploid
2022-PLATE-10_2022-102_194-P2_Fam1_R1_14	Fam1	7500 PSI	AB	AB	A	NA	A	NA	AB	A	AB	AB	AB	A	AB	AB	AB	AB	AB	AB	AB	AB	NA	7500PSI.R1	2	4	14	0	0	0	0	20	0	Diploid
2022-PLATE-10_2022-102_195-P2_Fam1_R1_15	Fam1	7500 PSI	AB	AB	A	NA	A	AB	AB	AB	AB	AB	A	AB	A	AB	AB	A	AB	AB	A	AB	NA	7500PSI.R1	1	6	13	0	0	0	0	20	0	Diploid
2022-PLATE-10_2022-102_196-P2_Fam2_R1_01	Fam2	7500 PSI	AAB	AAB	ABB	NA	ABC	A	ABC	ABB	AAB	ABB	ABC	AAB	AAB	ABB	ABB	AAB	ABC	A	AAB	A	NA	7500PSI.R1	1	3	0	7	5	4	16	20	1	Triploid
2022-PLATE-10_2022-102_197-P2_Fam2_R1_02	Fam2	7500 PSI	ABB	ABC	ABC	NA	ABC	A	ABC	ABB	A	ABB	ABB	AAB	AAB	A	AAB	AAB	ABC	ABB	AAB	ABB	NA	7500PSI.R1	1	3	0	5	6	5	16	20	1	Triploid
2022-PLATE-10_2022-102_198-P2_Fam2_R1_03	Fam2	7500 PSI	AB	AB	AB	NA	AB	NA	ABC	AB	AB	A	A	ABB	AB	ABB	AB	AB	AB	AB	A	A	NA	7500PSI.R1	2	4	11	0	2	1	3	20	0.214286	Aneuploid
2022-PLATE-10_2022-102_199-P2_Fam2_R1_04	Fam2	7500 PSI	AAB	ABC	ABB	NA	ABC	AAB	ABC	A	ABC	ABB	ABB	ABC	ABC	A	ABB	AAB	ABC	ABB	ABB	A	NA	7500PSI.R1	1	3	0	3	6	7	16	20	1	Triploid
2022-PLATE-10_2022-102_200-P2_Fam2_R1_05	Fam2	7500 PSI	AB	AB	AB	NA	AB	NA	AB	AB	AAB	ABC	ABC	AB	A	A	A	AB	AB	AB	A	A	NA	7500PSI.R1	2	5	10	1	0	2	3	20	0.230769	Aneuploid
2022-PLATE-10_2022-102_201-P2_Fam2_R1_06	Fam2	7500 PSI	AB	AB	AB	NA	ABC	AB	ABC	A	AB	AB	AB	ABC	AB	AB	ABB	AB	ABC	AB	AB	AB	NA	7500PSI.R1	1	1	13	0	1	4	5	20	0.277778	Aneuploid
2022-PLATE-10_2022-102_202-P2_Fam2_R1_07	Fam2	7500 PSI	ABB	ABC	ABB	A	ABC	NA	AAB	ABB	AAB	AAB	ABB	ABB	AAB	ABB	A	AAB	ABC	ABB	ABB	ABB	NA	7500PSI.R1	1	2	0	5	9	3	17	20	1	Triploid
2022-PLATE-10_2022-102_203-P2_Fam2_R1_08	Fam2	7500 PSI	ABB	ABB	ABC	A	AAB	AAB	AB	A	NA	AB	AB	ABC	ABC	A	ABB	AAB	ABC	A	A	ABB	NA	7500PSI.R1	1	5	3	3	4	4	11	20	0.785714	Aneuploid
2022-PLATE-10_2022-102_204-P2_Fam2_R1_09	Fam2	7500 PSI	ABB	AB	ABC	NA	ABC	A	ABC	AB	AB	A	AB	A	AAB	AB	ABB	AAB	ABC	A	AB	ABB	bp shift	7500PSI.R1	1	4	6	2	3	4	9	20	0.6	Aneuploid
2022-PLATE-10_2022-102_205-P2_Fam2_R1_10	Fam2	7500 PSI	AB	ABC	AB	NA	ABC	A	AB	ABB	ABC	ABB	AAB	ABB	AB	ABB	A	AAB	ABC	ABB	AAB	AB	NA	7500PSI.R1	1	2	5	3	5	4	12	20	0.705882	Aneuploid
2022-PLATE-10_2022-102_206-P2_Fam2_R1_11	Fam2	7500 PSI	AB	ABC	ABB	NA	ABC	A	AAB	AAB	ABC	ABB	ABB	ABC	ABB	A	A	AB	ABC	AB	A	A	NA	7500PSI.R1	1	5	3	2	4	5	11	20	0.785714	Aneuploid
2022-PLATE-10_2022-102_207-P2_Fam2_R1_12	Fam2	7500 PSI	ABB	ABC	ABB	A	NA	A	NA	ABB	ABC	ABB	ABB	AAB	ABB	ABB	A	AB	ABC	A	AAB	ABB	NA	7500PSI.R1	2	4	1	2	8	3	13	20	0.928571	Aneuploid
2022-PLATE-10_2022-102_208-P2_Fam2_R1_13	Fam2	7500 PSI	AAB	ABC	ABC	NA	AB	AAB	AAB	ABB	ABC	ABB	ABB	ABC	ABC	A	A	AAB	AB	A	A	A	NA	7500PSI.R1	1	5	2	4	3	5	12	20	0.857143	Aneuploid
2022-PLATE-10_2022-102_209-P2_Fam2_R1_14	Fam2	7500 PSI	AAB	AB	AB	A	AB	A	AAB	ABB	AAB	ABC	ABC	AB	A	A	A	AB	AB	AB	AAB	A	NA	7500PSI.R1	0	6	7	4	1	2	7	20	0.5	Aneuploid
2022-PLATE-10_2022-102_210-P2_Fam2_R1_15	Fam2	7500 PSI	AAB	ABC	ABC	NA	ABC	A	AB	AB	A	A	AB	A	A	A	A	AB	ABC	AB	A	A	NA	7500PSI.R1	1	9	5	1	0	4	5	20	0.5	Aneuploid
2022-PLATE-10_2022-102_211-P2_Fam3_R1_01	Fam3	7500 PSI	ABB	ABC	ABC	NA	ABC	AAB	ABC	A	ABC	AAB	ABC	AAB	ABC	A	AAB	AAB	ABC	AAB	ABB	A	NA	7500PSI.R1	1	3	0	6	2	8	16	20	1	Triploid
2022-PLATE-10_2022-102_212-P2_Fam3_R1_02	Fam3	7500 PSI	ABB	ABC	ABC	ABB	ABC	A	ABB	A	ABC	A	ABC	AAB	AAB	A	AAB	AAB	ABC	ABB	AAB	A	NA	7500PSI.R1	0	5	0	5	4	6	15	20	1	Triploid
2022-PLATE-10_2022-102_213-P2_Fam3_R1_03	Fam3	7500 PSI	AAB	ABC	ABC	NA	ABC	A	ABC	A	ABC	AAB	ABC	AAB	AAB	A	AAB	A	ABC	ABC	AAB	A	NA	7500PSI.R1	1	5	0	6	0	8	14	20	1	Triploid
2022-PLATE-10_2022-102_214-P2_Fam3_R1_04	Fam3	7500 PSI	ABB	ABB	ABC	ABB	ABC	A	ABC	A	AAB	A	ABC	ABC	AAB	AAB	AAB	AAB	ABC	ABB	AAB	AAB	NA	7500PSI.R1	0	3	0	7	4	6	17	20	1	Triploid
2022-PLATE-10_2022-102_215-P2_Fam3_R1_05	Fam3	7500 PSI	AAB	ABC	ABC	NA	ABC	NA	ABC	A	ABC	AAB	ABC	ABC	AAB	AAB	AAB	A	ABC	ABC	AAB	AAB	NA	7500PSI.R1	2	2	0	7	0	9	16	20	1	Triploid
2022-PLATE-10_2022-102_216-P2_Fam3_R1_06	Fam3	7500 PSI	ABB	ABC	ABC	ABB	ABC	AAB	ABC	A	ABC	A	ABC	ABC	ABC	AAB	AAB	AAB	ABC	ABB	A	AAB	NA	7500PSI.R1	0	3	0	5	3	9	17	20	1	Triploid
2022-PLATE-10_2022-102_217-P2_Fam3_R1_07	Fam3	7500 PSI	AAB	ABC	ABC	NA	ABC	NA	ABC	A	ABB	A	ABC	AAB	ABB	AAB	AAB	AAB	ABC	A	AAB	AAB	NA	7500PSI.R1	2	3	0	7	2	6	15	20	1	Triploid
2022-PLATE-10_2022-102_218-P2_Fam3_R1_08	Fam3	7500 PSI	ABB	ABC	ABC	NA	ABC	AAB	ABC	A	ABC	A	ABC	AAB	ABC	AAB	AAB	A	ABC	ABC	AAB	AAB	NA	7500PSI.R1	1	3	0	6	1	9	16	20	1	Triploid
2022-PLATE-10_2022-102_219-P2_Fam3_R1_09	Fam3	7500 PSI	ABB	ABC	ABC	NA	ABC	A	ABB	A	ABC	AAB	ABC	AAB	ABB	AAB	AAB	AAB	ABC	AAB	ABB	A	NA	7500PSI.R1	1	3	0	6	4	6	16	20	1	Triploid
2022-PLATE-10_2022-102_220-P2_Fam3_R1_10	Fam3	7500 PSI	ABB	ABC	ABC	NA	ABC	AAB	ABC	A	ABC	AAB	ABC	AAB	ABC	A	AAB	AAB	ABC	ABB	ABB	AAB	NA	7500PSI.R1	1	2	0	6	3	8	17	20	1	Triploid
2022-PLATE-10_2022-102_221-P2_Fam3_R1_11	Fam3	7500 PSI	ABB	ABC	ABC	ABB	ABC	AAB	ABB	ABB	ABC	A	ABC	AAB	ABC	AAB	AAB	AAB	ABC	ABB	AAB	AAB	NA	7500PSI.R1	0	1	0	7	5	7	19	20	1	Triploid
2022-PLATE-10_2022-102_222-P2_Fam3_R1_12	Fam3	7500 PSI	AAB	ABC	ABC	ABB	ABC	A	ABC	ABB	ABC	AAB	ABC	ABC	A	AAB	AAB	AAB	ABC	A	AAB	AAB	NA	7500PSI.R1	0	3	0	7	2	8	17	20	1	Triploid
2022-PLATE-10_2022-102_223-P2_Fam3_R1_13	Fam3	7500 PSI	AAB	ABC	ABC	NA	ABC	AAB	ABC	A	ABC	AAB	ABC	AAB	ABC	AAB	AAB	AAB	ABC	AAB	AAB	A	NA	7500PSI.R1	1	2	0	9	0	8	17	20	1	Triploid
2022-PLATE-10_2022-102_224-P2_Fam3_R1_14	Fam3	7500 PSI	AAB	ABC	ABC	NA	ABC	AAB	ABC	ABB	ABC	A	ABC	AAB	ABC	A	AAB	A	ABC	ABC	AAB	A	NA	7500PSI.R1	1	4	0	5	1	9	15	20	1	Triploid
2022-PLATE-10_2022-102_225-P2_Fam3_R1_15	Fam3	7500 PSI	ABB	ABC	ABC	NA	ABC	A	ABC	ABB	ABC	A	ABC	ABC	ABB	AAB	AAB	AAB	ABC	ABB	ABB	A	NA	7500PSI.R1	1	3	0	3	5	8	16	20	1	Triploid
2022-PLATE-10_2022-102_226-P2_Fam1_R2_01	Fam1	7500 PSI	ABB	ABC	ABB	ABC	ABB	AAB	AAB	ABB	ABC	AAB	ABC	AAB	AAB	A	ABC	ABB	ABB	ABB	A	A	NA	7500PSI.R2	0	3	0	5	7	5	17	20	1	Triploid
2022-PLATE-10_2022-102_227-P2_Fam1_R2_02	Fam1	7500 PSI	AB	AB	AB	AB	AB	AB	AB	A	AB	AB	AB	A	A	AB	AB	AB	AB	AB	A	AB	NA	7500PSI.R2	0	4	16	0	0	0	0	20	0	Diploid
2022-PLATE-10_2022-102_228-P2_Fam1_R2_03	Fam1	7500 PSI	AAB	ABC	ABB	NA	NA	NA	AAB	ABB	ABB	AAB	ABB	A	ABC	A	ABC	ABC	ABB	ABC	AAB	A	NA	7500PSI.R2	3	3	0	4	5	5	14	20	1	Triploid
2022-PLATE-10_2022-102_229-P2_Fam1_R2_04	Fam1	7500 PSI	AAB	ABB	ABB	ABC	ABB	A	ABB	A	ABB	ABC	ABB	A	ABC	AAB	ABC	ABC	ABB	ABC	AAB	AAB	NA	7500PSI.R2	0	3	0	4	7	6	17	20	1	Triploid
2022-PLATE-10_2022-102_230-P2_Fam1_R2_05	Fam1	7500 PSI	AAB	ABC	A	ABC	ABC	A	ABB	ABB	ABC	ABC	ABC	A	ABC	AAB	ABC	ABC	ABB	ABC	AAB	AAB	NA	7500PSI.R2	0	3	0	4	3	10	17	20	1	Triploid
2022-PLATE-10_2022-102_231-P2_Fam1_R2_06	Fam1	7500 PSI	ABB	ABC	ABB	NA	ABC	NA	AAB	A	ABB	A	ABB	AAB	AAB	A	ABC	ABB	ABB	ABB	AAB	A	NA	7500PSI.R2	2	4	0	4	7	3	14	20	1	Triploid
2022-PLATE-10_2022-102_232-P2_Fam1_R2_07	Fam1	7500 PSI	AB	AB	ABB	NA	A	NA	AB	AB	AB	AB	A	AAB	ABC	AB	AB	AB	AB	A	A	AB	NA	7500PSI.R2	2	4	11	1	1	1	3	20	0.214286	Aneuploid
2022-PLATE-10_2022-102_233-P2_Fam1_R2_08	Fam1	7500 PSI	ABC	AB	AB	NA	AB	A	AB	A	A	AB	AB	AAB	AB	AB	AB	A	AB	AB	AB	AB	NA	7500PSI.R2	1	4	13	1	0	1	2	20	0.133333	Aneuploid
2022-PLATE-10_2022-102_234-P2_Fam1_R2_09	Fam1	7500 PSI	ABC	ABC	A	ABC	NA	AAB	NA	ABC	NA	A	ABC	A	AAB	AAB	ABC	ABB	ABB	ABB	AAB	A	bp shift	7500PSI.R2	3	4	0	4	3	6	13	20	1	Triploid
2022-PLATE-10_2022-102_235-P2_Fam1_R2_10	Fam1	7500 PSI	AAB	ABC	A	NA	ABC	AAB	ABB	A	A	ABB	ABB	AAB	AAB	AAB	ABC	ABB	ABB	ABB	ABB	A	NA	7500PSI.R2	1	4	0	5	7	3	15	20	1	Triploid
2022-PLATE-10_2022-102_236-P2_Fam1_R2_11	Fam1	7500 PSI	AAB	ABC	A	NA	ABC	NA	ABB	NA	NA	AAB	ABB	AAB	ABC	AAB	ABC	ABB	ABB	ABB	ABB	AAB	NA	7500PSI.R2	4	1	0	5	6	4	15	20	1	Triploid
2022-PLATE-10_2022-102_237-P2_Fam1_R2_12	Fam1	7500 PSI	ABC	ABC	A	ABC	ABB	A	ABB	ABB	ABB	AAB	ABB	A	ABC	AAB	ABC	ABB	ABB	ABB	AAB	AAB	NA	7500PSI.R2	0	3	0	4	8	5	17	20	1	Triploid
2022-PLATE-10_2022-102_238-P2_Fam1_R2_13	Fam1	7500 PSI	AB	AB	A	NA	ABC	AB	AB	AB	AB	A	AB	AB	A	AB	AB	A	ABB	A	A	AAB	NA	7500PSI.R2	1	6	10	1	1	1	3	20	0.230769	Aneuploid
2022-PLATE-10_2022-102_239-P2_Fam1_R2_14	Fam1	7500 PSI	ABB	ABC	A	ABC	ABC	AAB	AAB	A	ABC	A	ABC	AAB	A	AAB	ABC	ABB	ABB	ABB	AAB	AAB	NA	7500PSI.R2	0	4	0	6	4	6	16	20	1	Triploid
2022-PLATE-10_2022-102_240-P2_Fam1_R2_15	Fam1	7500 PSI	ABB	ABC	ABB	NA	ABC	NA	AAB	A	ABB	ABB	ABB	AAB	ABC	A	ABC	ABB	ABB	ABB	AAB	AAB	NA	7500PSI.R2	2	2	0	4	8	4	16	20	1	Triploid
2022-PLATE-10_2022-102_241-P2_Fam2_R2_01	Fam2	7500 PSI	ABB	ABC	ABB	NA	ABC	AAB	ABC	AAB	AAB	ABC	ABC	ABC	ABC	ABB	AAB	AAB	ABC	A	AAB	A	NA	7500PSI.R2	1	2	0	6	3	8	17	20	1	Triploid
2022-PLATE-10_2022-102_242-P2_Fam2_R2_02	Fam2	7500 PSI	ABB	ABC	ABC	NA	ABC	AB	AB	AB	AAB	ABC	ABC	ABC	AB	A	A	AAB	ABC	A	A	AB	NA	7500PSI.R2	1	4	5	2	1	7	10	20	0.666667	Aneuploid
2022-PLATE-10_2022-102_243-P2_Fam2_R2_03	Fam2	7500 PSI	ABB	ABC	ABC	NA	ABC	AAB	ABC	ABB	ABC	ABB	ABB	AB	ABB	A	ABB	AAB	ABC	ABB	AAB	ABB	NA	7500PSI.R2	1	1	1	3	8	6	17	20	0.944444	Aneuploid
2022-PLATE-10_2022-102_244-P2_Fam2_R2_04	Fam2	7500 PSI	ABB	AB	ABB	NA	ABC	AAB	ABC	AAB	AAB	AAB	ABC	A	ABC	AAB	AAB	AAB	ABC	ABB	A	ABB	NA	7500PSI.R2	1	2	1	7	4	5	16	20	0.941176	Aneuploid
2022-PLATE-10_2022-102_245-P2_Fam2_R2_05	Fam2	7500 PSI	AAB	ABC	AB	NA	ABB	AAB	ABB	AAB	AAB	ABC	ABC	ABB	ABC	AAB	A	AAB	ABC	ABB	AAB	ABB	NA	7500PSI.R2	1	1	1	7	5	5	17	20	0.944444	Aneuploid
2022-PLATE-10_2022-102_246-P2_Fam2_R2_06	Fam2	7500 PSI	ABB	ABC	ABB	NA	ABC	AB	ABC	AB	AAB	ABB	ABC	A	AB	AB	ABB	AAB	ABC	ABB	AAB	AB	NA	7500PSI.R2	1	1	5	3	5	5	13	20	0.722222	Aneuploid
2022-PLATE-10_2022-102_247-P2_Fam2_R2_07	Fam2	7500 PSI	AB	AB	NA	A	AB	A	ABC	AB	AB	AB	AB	AAB	AAB	AB	ABB	AB	AB	A	A	AB	NA	7500PSI.R2	1	4	11	2	1	1	4	20	0.266667	Aneuploid
2022-PLATE-10_2022-102_248-P2_Fam2_R2_08	Fam2	7500 PSI	AB	ABC	A	A	ABC	AAB	AB	AAB	A	A	ABB	ABC	ABB	A	AAB	AAB	ABC	ABB	AAB	AB	NA	7500PSI.R2	0	5	3	5	3	4	12	20	0.8	Aneuploid
2022-PLATE-10_2022-102_249-P2_Fam2_R2_09	Fam2	7500 PSI	ABB	AB	ABB	NA	AB	AB	AB	AAB	AB	AB	A	ABB	AB	A	AB	AB	AB	A	A	AB	NA	7500PSI.R2	1	4	11	1	3	0	4	20	0.266667	Aneuploid
2022-PLATE-10_2022-102_250-P2_Fam2_R2_10	Fam2	7500 PSI	ABB	ABC	ABB	NA	ABC	A	ABC	AAB	ABC	ABB	ABB	ABC	AAB	A	ABB	AAB	ABC	A	ABB	ABB	NA	7500PSI.R2	1	3	0	3	7	6	16	20	1	Triploid
2022-PLATE-10_2022-102_251-P2_Fam2_R2_11	Fam2	7500 PSI	ABB	ABC	ABB	NA	ABC	AAB	ABC	A	ABC	ABB	ABB	ABC	ABB	AAB	ABB	AAB	ABC	ABB	ABB	ABB	NA	7500PSI.R2	1	1	0	3	9	6	18	20	1	Triploid
2022-PLATE-10_2022-102_252-P2_Fam2_R2_12	Fam2	7500 PSI	ABB	AB	ABC	NA	AB	A	AB	ABB	AAB	ABC	ABC	ABB	AB	AB	AAB	AAB	AB	ABB	A	AB	NA	7500PSI.R2	1	2	7	3	4	3	10	20	0.588235	Aneuploid
2022-PLATE-10_2022-102_253-P2_Fam2_R2_13	Fam2	7500 PSI	AAB	ABC	ABB	A	NA	AAB	NA	AAB	ABC	AAB	ABB	ABB	ABC	AAB	ABB	AB	ABC	AB	AAB	ABC	bp shift	7500PSI.R2	2	1	2	6	4	5	15	20	0.882353	Aneuploid
2022-PLATE-10_2022-102_254-P2_Fam2_R2_14	Fam2	7500 PSI	AB	ABC	NA	NA	ABC	A	AB	AAB	ABC	AAB	ABB	ABB	A	A	A	AB	ABC	AB	A	AB	NA	7500PSI.R2	2	5	5	2	2	4	8	20	0.615385	Aneuploid
2022-PLATE-10_2022-102_255-P2_Fam2_R2_15	Fam2	7500 PSI	ABB	ABC	ABB	NA	ABC	A	ABC	AAB	AAB	ABC	ABC	ABB	AAB	ABB	ABB	AAB	ABC	A	A	A	NA	7500PSI.R2	1	4	0	4	5	6	15	20	1	Triploid
2022-PLATE-10_2022-102_256-P2_Fam3_R2_01	Fam3	7500 PSI	ABB	ABC	ABC	NA	ABC	A	ABC	A	ABC	AAB	ABC	AAB	AAB	A	AAB	AAB	ABC	ABB	ABB	AAB	NA	7500PSI.R2	1	3	0	6	3	7	16	20	1	Triploid
2022-PLATE-10_2022-102_257-P2_Fam3_R2_02	Fam3	7500 PSI	ABB	ABC	AAB	NA	ABC	AAB	ABC	A	ABC	A	ABC	AAB	ABC	AAB	AAB	A	ABC	AAB	AAB	AAB	NA	7500PSI.R2	1	3	0	8	1	7	16	20	1	Triploid
2022-PLATE-10_2022-102_258-P2_Fam3_R2_03	Fam3	7500 PSI	ABB	ABC	ABC	NA	ABC	NA	ABC	ABB	NA	AAB	ABC	ABC	ABB	AAB	AAB	A	ABC	ABC	AAB	AAB	NA	7500PSI.R2	3	1	0	5	3	8	16	20	1	Triploid
2022-PLATE-10_2022-102_259-P2_Fam3_R2_04	Fam3	7500 PSI	ABB	ABC	ABC	ABB	ABC	A	ABC	ABB	ABB	AAB	ABC	ABC	AAB	A	AAB	A	ABC	ABC	A	AAB	NA	7500PSI.R2	0	4	0	4	4	8	16	20	1	Triploid
2022-PLATE-10_2022-102_260-P2_Fam3_R2_05	Fam3	7500 PSI	ABB	ABC	AAB	ABB	NA	AAB	NA	ABB	ABC	A	ABC	NA	ABB	NA	NA	AAB	ABC	ABB	A	NA	NA	7500PSI.R2	6	2	0	3	5	4	12	20	1	Triploid
2022-PLATE-10_2022-102_261-P2_Fam3_R2_06	Fam3	7500 PSI	AAB	ABC	ABC	ABB	NA	A	NA	ABB	ABB	A	ABC	AAB	A	A	AAB	AAB	ABC	ABB	AAB	A	NA	7500PSI.R2	2	5	0	5	4	4	13	20	1	Triploid
2022-PLATE-10_2022-102_262-P2_Fam3_R2_07	Fam3	7500 PSI	ABB	ABC	ABC	NA	ABC	A	ABC	A	ABC	AAB	ABC	ABC	AAB	A	AAB	A	ABC	ABC	A	AAB	NA	7500PSI.R2	1	5	0	4	1	9	14	20	1	Triploid
2022-PLATE-10_2022-102_263-P2_Fam3_R2_08	Fam3	7500 PSI	ABB	ABC	ABC	ABB	ABC	A	ABC	ABB	ABB	A	ABC	AAB	A	A	AAB	AAB	ABC	AAB	A	A	NA	7500PSI.R2	0	6	0	4	4	6	14	20	1	Triploid
2022-PLATE-10_2022-102_264-P2_Fam3_R2_09	Fam3	7500 PSI	ABB	ABC	ABC	NA	ABC	NA	ABC	ABB	ABC	AAB	ABC	AAB	AAB	A	AAB	AAB	ABC	ABB	AAB	A	NA	7500PSI.R2	2	2	0	6	3	7	16	20	1	Triploid
2022-PLATE-10_2022-102_265-P2_Fam3_R2_10	Fam3	7500 PSI	ABB	ABC	ABC	NA	ABC	AAB	ABC	A	ABC	AAB	ABC	A	ABC	AAB	AAB	AAB	ABC	ABB	ABB	AAB	NA	7500PSI.R2	1	2	0	6	3	8	17	20	1	Triploid
2022-PLATE-10_2022-102_266-P2_Fam3_R2_11	Fam3	7500 PSI	AAB	ABC	ABC	NA	ABC	A	ABC	ABB	ABC	AAB	ABC	ABC	AAB	AAB	AAB	AAB	ABC	ABB	AAB	A	NA	7500PSI.R2	1	2	0	7	2	8	17	20	1	Triploid
2022-PLATE-10_2022-102_267-P2_Fam3_R2_12	Fam3	7500 PSI	ABB	ABC	ABC	ABB	ABC	AAB	ABC	A	ABB	A	ABC	ABC	ABC	AAB	AAB	AAB	ABC	ABB	A	AAB	NA	7500PSI.R2	0	3	0	5	4	8	17	20	1	Triploid
2022-PLATE-10_2022-102_268-P2_Fam3_R2_13	Fam3	7500 PSI	ABB	ABC	ABC	NA	ABC	NA	ABC	ABB	ABC	A	ABC	AAB	AAB	A	AAB	A	ABC	ABC	AAB	A	NA	7500PSI.R2	2	4	0	4	2	8	14	20	1	Triploid
2022-PLATE-10_2022-102_269-P2_Fam3_R2_14	Fam3	7500 PSI	AAB	ABC	ABC	ABB	ABC	A	ABC	ABB	AAB	AAB	ABC	ABC	ABB	A	AAB	AAB	ABC	ABB	AAB	AAB	NA	7500PSI.R2	0	2	0	7	4	7	18	20	1	Triploid
2022-PLATE-10_2022-102_270-P2_Fam3_R2_15	Fam3	7500 PSI	ABB	ABC	ABC	ABB	AAB	AAB	ABC	A	ABC	A	ABC	AAB	ABC	A	AAB	A	ABC	ABC	AAB	AAB	NA	7500PSI.R2	0	4	0	6	2	8	16	20	1	Triploid
2022-PLATE-10_2022-102_271-P3_Fam1_R1_01	Fam1	8500 PSI	AAB	ABC	A	ABC	ABB	AAB	AAB	A	ABC	AAB	ABC	AAB	AAB	AAB	AAB	ABB	ABB	AAB	AAB	A	NA	8500PSI.R1	0	3	0	10	3	4	17	20	1	Triploid
2022-PLATE-10_2022-102_272-P3_Fam1_R1_02	Fam1	8500 PSI	AB	AB	A	NA	AB	AB	AB	A	A	AB	AB	A	A	AB	AB	AB	AB	AB	AB	A	NA	8500PSI.R1	1	6	13	0	0	0	0	20	0	Diploid
2022-PLATE-10_2022-102_273-P3_Fam1_R1_03	Fam1	8500 PSI	AAB	ABC	ABB	ABC	ABB	AAB	AAB	ABB	ABB	AAB	ABB	AAB	ABB	A	ABC	ABB	ABB	ABB	A	A	NA	8500PSI.R1	0	3	0	5	9	3	17	20	1	Triploid
2022-PLATE-10_2022-102_274-P3_Fam1_R1_04	Fam1	8500 PSI	ABC	ABC	A	ABC	ABC	A	AAB	A	A	ABB	ABB	AAB	ABB	A	AB	AAB	ABB	ABB	AAB	A	NA	8500PSI.R1	0	6	1	4	5	4	13	20	0.928571	Aneuploid
2022-PLATE-10_2022-102_275-P3_Fam1_R1_05	Fam1	8500 PSI	AAB	ABC	A	NA	ABB	NA	AAB	A	AAB	AAB	ABB	A	AAB	A	ABC	ABB	ABB	AAB	ABB	AAB	NA	8500PSI.R1	2	4	0	7	5	2	14	20	1	Triploid
2022-PLATE-10_2022-102_276-P3_Fam1_R1_06	Fam1	8500 PSI	AAB	AB	A	NA	ABB	NA	AAB	AB	ABC	AAB	ABC	AAB	AAB	A	ABB	ABC	ABB	ABC	AAB	AAB	NA	8500PSI.R1	2	2	2	7	3	4	14	20	0.875	Aneuploid
2022-PLATE-10_2022-102_277-P3_Fam1_R1_07	Fam1	8500 PSI	AAB	ABC	A	ABC	ABB	A	AAB	ABB	ABB	ABC	ABB	A	ABC	A	ABC	ABB	ABB	ABC	ABB	AAB	NA	8500PSI.R1	0	4	0	3	7	6	16	20	1	Triploid
2022-PLATE-10_2022-102_278-P3_Fam1_R1_08	Fam1	8500 PSI	ABC	ABC	A	NA	ABB	AAB	AAB	ABB	ABC	ABC	ABC	A	AAB	A	ABC	AAB	ABB	AAB	AAB	A	NA	8500PSI.R1	1	4	0	6	3	6	15	20	1	Triploid
2022-PLATE-10_2022-102_279-P3_Fam1_R1_09	Fam1	8500 PSI	AAB	ABC	AB	ABC	ABC	A	ABB	A	ABB	ABC	ABB	AAB	AB	A	ABC	ABB	ABB	ABB	AAB	A	NA	8500PSI.R1	0	4	2	3	6	5	14	20	0.875	Aneuploid
2022-PLATE-10_2022-102_280-P3_Fam1_R1_10	Fam1	8500 PSI	AAB	ABC	ABB	NA	ABC	NA	ABB	A	ABB	ABC	ABB	A	ABC	AAB	ABC	ABC	ABB	ABC	ABB	AAB	NA	8500PSI.R1	2	2	0	3	6	7	16	20	1	Triploid
2022-PLATE-10_2022-102_281-P3_Fam1_R1_11	Fam1	8500 PSI	ABC	ABC	ABB	NA	ABC	AAB	AAB	ABB	ABC	AAB	ABC	A	ABB	A	ABC	ABB	ABB	ABB	ABB	AAB	NA	8500PSI.R1	1	2	0	4	7	6	17	20	1	Triploid
2022-PLATE-10_2022-102_282-P3_Fam1_R1_12	Fam1	8500 PSI	ABB	ABC	ABB	ABC	ABB	A	ABB	ABB	ABB	A	ABC	A	ABC	AAB	ABB	ABB	ABB	ABB	AAB	AAB	NA	8500PSI.R1	0	3	0	3	10	4	17	20	1	Triploid
2022-PLATE-11_2022-102_283-P3_Fam1_R1_13	Fam1	8500 PSI	ABC	ABC	ABB	NA	ABC	AAB	ABB	A	A	AAB	AAB	AAB	ABB	A	AAB	A	ABB	ABB	AAB	A	NA	8500PSI.R1	1	5	0	6	5	3	14	20	1	Triploid
2022-PLATE-11_2022-102_284-P3_Fam1_R1_14	Fam1	8500 PSI	AAB	ABC	A	NA	ABC	A	AAB	ABB	A	AAB	ABC	A	ABC	A	ABC	A	ABB	AAB	AAB	AAB	bp shift	8500PSI.R1	1	6	0	6	2	5	13	20	1	Triploid
2022-PLATE-11_2022-102_285-P3_Fam1_R1_15	Fam1	8500 PSI	ABB	ABC	A	NA	ABB	NA	ABB	A	ABB	A	ABC	AAB	ABC	AAB	ABC	ABC	ABB	ABC	A	NA	NA	8500PSI.R1	3	4	0	2	5	6	13	20	1	Triploid
2022-PLATE-11_2022-102_286-P3_Fam2_R1_01	Fam2	8500 PSI	ABB	ABC	ABB	NA	ABC	AAB	ABC	AAB	AAB	ABB	ABB	ABC	ABC	A	AAB	AAB	ABC	A	ABB	A	NA	8500PSI.R1	1	3	0	5	5	6	16	20	1	Triploid
2022-PLATE-11_2022-102_287-P3_Fam2_R1_02	Fam2	8500 PSI	AAB	ABC	ABB	NA	AAB	NA	AAB	ABB	NA	ABB	ABC	ABC	A	A	ABB	AAB	ABC	A	AAB	ABB	NA	8500PSI.R1	3	3	0	5	5	4	14	20	1	Triploid
2022-PLATE-11_2022-102_288-P3_Fam2_R1_03	Fam2	8500 PSI	AAB	ABC	ABB	NA	ABC	AAB	ABC	AAB	AAB	A	ABB	ABC	ABC	ABB	ABB	AAB	ABC	ABB	AAB	ABB	NA	8500PSI.R1	1	1	0	6	6	6	18	20	1	Triploid
2022-PLATE-11_2022-102_289-P3_Fam2_R1_04	Fam2	8500 PSI	ABB	AAB	ABC	A	ABC	AAB	ABC	A	AAB	ABC	ABC	ABB	ABC	A	ABB	AAB	ABC	ABB	A	ABB	NA	8500PSI.R1	0	4	0	4	5	7	16	20	1	Triploid
2022-PLATE-11_2022-102_290-P3_Fam2_R1_05	Fam2	8500 PSI	AAB	ABC	ABC	NA	ABC	AAB	ABC	AAB	ABC	ABC	ABB	ABB	ABC	ABB	ABB	AAB	ABC	A	AAB	ABB	NA	8500PSI.R1	1	1	0	5	5	8	18	20	1	Triploid
2022-PLATE-11_2022-102_291-P3_Fam2_R1_06	Fam2	8500 PSI	ABB	ABC	ABB	NA	AAB	AAB	NA	NA	NA	ABC	ABC	ABC	ABC	AAB	ABB	AAB	ABC	A	ABB	ABB	NA	8500PSI.R1	4	1	0	4	5	6	15	20	1	Triploid
2022-PLATE-11_2022-102_292-P3_Fam2_R1_07	Fam2	8500 PSI	ABB	ABC	ABC	NA	AAB	AAB	ABC	AAB	ABC	ABC	ABB	ABC	ABC	ABB	ABB	AAB	ABC	A	ABB	ABB	NA	8500PSI.R1	1	1	0	4	6	8	18	20	1	Triploid
2022-PLATE-11_2022-102_293-P3_Fam2_R1_08	Fam2	8500 PSI	AAB	ABC	ABB	NA	AAB	AAB	ABC	AAB	ABC	A	ABB	ABC	ABC	A	ABB	AAB	ABC	ABB	A	ABB	NA	8500PSI.R1	1	3	0	5	5	6	16	20	1	Triploid
2022-PLATE-11_2022-102_294-P3_Fam2_R1_09	Fam2	8500 PSI	ABB	ABC	A	NA	ABC	AAB	ABC	NA	NA	ABB	ABC	A	ABC	A	ABB	AAB	ABC	ABB	AAB	ABC	NA	8500PSI.R1	3	3	0	3	4	7	14	20	1	Triploid
2022-PLATE-11_2022-102_295-P3_Fam2_R1_10	Fam2	8500 PSI	AAB	ABC	ABB	NA	AB	NA	ABC	AAB	AAB	ABB	ABB	ABB	AAB	ABB	ABB	AAB	AB	A	AAB	A	NA	8500PSI.R1	2	2	2	6	6	2	14	20	0.875	Aneuploid
2022-PLATE-11_2022-102_296-P3_Fam2_R1_11	Fam2	8500 PSI	AAB	ABC	ABC	NA	ABC	A	ABC	ABB	ABC	ABB	ABB	ABC	AAB	ABB	AAB	AAB	ABC	A	ABB	ABB	NA	8500PSI.R1	1	2	0	4	6	7	17	20	1	Triploid
2022-PLATE-11_2022-102_297-P3_Fam2_R1_12	Fam2	8500 PSI	AAB	ABC	ABC	NA	ABC	A	ABC	AAB	AAB	ABC	ABC	ABC	ABB	AAB	AAB	AAB	ABC	A	A	ABB	NA	8500PSI.R1	1	3	0	6	2	8	16	20	1	Triploid
2022-PLATE-11_2022-102_298-P3_Fam2_R1_13	Fam2	8500 PSI	AAB	ABC	ABB	NA	ABC	AAB	ABC	ABB	A	A	ABC	ABB	ABC	A	A	AAB	ABC	ABB	A	ABB	NA	8500PSI.R1	1	5	0	3	5	6	14	20	1	Triploid
2022-PLATE-11_2022-102_299-P3_Fam2_R1_14	Fam2	8500 PSI	ABB	ABC	ABB	NA	ABC	NA	ABC	A	ABC	ABB	ABB	ABC	AAB	A	AAB	AAB	ABC	A	ABB	ABB	NA	8500PSI.R1	2	3	0	3	6	6	15	20	1	Triploid
2022-PLATE-11_2022-102_300-P3_Fam2_R1_15	Fam2	8500 PSI	ABB	ABC	ABB	NA	ABC	AAB	ABC	AAB	ABC	ABB	ABB	ABB	ABC	A	ABB	AAB	ABC	A	ABB	ABB	NA	8500PSI.R1	1	2	0	3	8	6	17	20	1	Triploid
2022-PLATE-11_2022-102_301-P3_Fam3_R1_01	Fam3	8500 PSI	ABB	ABC	ABB	NA	ABC	AAB	ABC	A	ABC	A	ABC	ABC	ABC	AAB	AAB	AAB	ABC	ABB	A	A	NA	8500PSI.R1	1	4	0	4	3	8	15	20	1	Triploid
2022-PLATE-11_2022-102_302-P3_Fam3_R1_02	Fam3	8500 PSI	ABB	ABC	ABC	ABB	NA	AAB	ABC	A	ABC	AAB	ABC	ABC	ABC	AAB	AAB	A	ABC	NA	AAB	AAB	bp shift	8500PSI.R1	2	2	0	6	2	8	16	20	1	Triploid
2022-PLATE-11_2022-102_303-P3_Fam3_R1_03	Fam3	8500 PSI	AAB	ABC	AAB	ABB	ABC	AAB	ABC	A	ABC	A	ABC	ABC	ABC	AAB	AAB	A	ABC	ABC	AAB	A	NA	8500PSI.R1	0	4	0	6	1	9	16	20	1	Triploid
2022-PLATE-11_2022-102_304-P3_Fam3_R1_04	Fam3	8500 PSI	AAB	ABC	ABC	NA	ABC	AAB	AAB	A	ABC	A	ABC	AAB	ABC	A	AAB	A	ABC	AAB	AAB	A	NA	8500PSI.R1	1	5	0	7	0	7	14	20	1	Triploid
2022-PLATE-11_2022-102_305-P3_Fam3_R1_05	Fam3	8500 PSI	AAB	ABC	ABC	ABB	ABB	AAB	AAB	ABB	ABC	AAB	ABC	A	ABC	AAB	AAB	A	ABC	ABC	ABB	A	NA	8500PSI.R1	0	3	0	6	4	7	17	20	1	Triploid
2022-PLATE-11_2022-102_306-P3_Fam3_R1_06	Fam3	8500 PSI	AAB	ABC	ABC	NA	ABC	AAB	ABC	ABB	AAB	NA	ABC	ABC	NA	A	AAB	NA	NA	ABB	NA	AAB	NA	8500PSI.R1	6	1	0	5	2	6	13	20	1	Triploid
2022-PLATE-11_2022-102_307-P3_Fam3_R1_07	Fam3	8500 PSI	ABB	ABB	ABC	NA	ABC	AAB	ABC	ABB	NA	AAB	ABC	AAB	ABC	AAB	AAB	AAB	ABC	ABB	AAB	AAB	NA	8500PSI.R1	2	0	0	8	4	6	18	20	1	Triploid
2022-PLATE-11_2022-102_308-P3_Fam3_R1_08	Fam3	8500 PSI	ABB	ABC	ABC	NA	ABC	NA	ABC	A	ABC	AAB	ABC	AAB	ABB	AAB	AAB	A	ABC	ABC	A	AAB	NA	8500PSI.R1	2	3	0	5	2	8	15	20	1	Triploid
2022-PLATE-11_2022-102_309-P3_Fam3_R1_09	Fam3	8500 PSI	ABB	ABC	ABC	NA	NA	NA	NA	NA	NA	AAB	ABC	AAB	AAB	AAB	AAB	AAB	ABC	A	AAB	AAB	NA	8500PSI.R1	6	1	0	8	1	4	13	20	1	Triploid
2022-PLATE-11_2022-102_310-P3_Fam3_R1_10	Fam3	8500 PSI	AAB	ABC	ABC	ABB	ABC	A	ABC	ABB	ABB	AAB	ABC	ABC	AAB	A	AAB	AAB	ABC	ABB	AAB	A	NA	8500PSI.R1	0	3	0	6	4	7	17	20	1	Triploid
2022-PLATE-11_2022-102_311-P3_Fam3_R1_11	Fam3	8500 PSI	AAB	ABC	ABC	NA	ABC	NA	ABB	NA	NA	AAB	ABC	ABC	A	AAB	AAB	AAB	ABC	ABB	AAB	NA	NA	8500PSI.R1	5	1	0	6	2	6	14	20	1	Triploid
2022-PLATE-11_2022-102_312-P3_Fam3_R1_12	Fam3	8500 PSI	ABB	ABC	ABC	ABB	NA	A	AAB	A	ABC	A	ABC	AAB	A	AAB	AAB	AAB	ABC	A	AAB	A	NA	8500PSI.R1	1	6	0	6	2	5	13	20	1	Triploid
2022-PLATE-11_2022-102_313-P3_Fam3_R1_13	Fam3	8500 PSI	AAB	ABC	ABC	ABB	NA	AAB	ABC	ABB	AAB	AAB	ABC	A	ABC	AAB	AAB	AAB	ABC	ABB	AAB	AAB	NA	8500PSI.R1	1	1	0	9	3	6	18	20	1	Triploid
2022-PLATE-11_2022-102_314-P3_Fam3_R1_14	Fam3	8500 PSI	AAB	ABC	ABC	ABB	ABC	AAB	ABC	ABB	ABC	AAB	ABC	AAB	ABC	A	AAB	A	ABC	AAB	AAB	A	NA	8500PSI.R1	0	3	0	7	2	8	17	20	1	Triploid
2022-PLATE-11_2022-102_315-P3_Fam3_R1_15	Fam3	8500 PSI	AAB	ABC	ABC	NA	ABC	AAB	ABC	A	ABC	AAB	ABC	AAB	ABC	AAB	AAB	AAB	ABC	ABB	A	NA	NA	8500PSI.R1	2	2	0	7	1	8	16	20	1	Triploid
2022-PLATE-11_2022-102_316-P3_Fam1_R2_01	Fam1	8500 PSI	AAB	ABC	ABB	ABC	ABB	AAB	ABB	A	ABB	ABC	ABB	A	AAB	AAB	AAB	ABB	ABB	AAB	AAB	A	NA	8500PSI.R2	0	3	0	7	7	3	17	20	1	Triploid
2022-PLATE-11_2022-102_317-P3_Fam1_R2_02	Fam1	8500 PSI	AB	AB	ABB	ABC	A	AB	ABB	A	ABB	ABC	ABB	A	AB	AAB	ABC	ABB	A	ABB	AAB	AAB	Missing maternal 1-3 loci	8500PSI.R2	0	4	4	3	6	3	12	20	0.75	Aneuploid
2022-PLATE-11_2022-102_318-P3_Fam1_R2_03	Fam1	8500 PSI	AAB	ABC	NA	NA	NA	A	ABB	ABB	NA	NA	NA	NA	ABC	NA	NA	A	ABB	ABB	AAB	AAB	NA	8500PSI.R2	9	2	0	3	4	2	9	20	1	Triploid
2022-PLATE-11_2022-102_319-P3_Fam1_R2_04	Fam1	8500 PSI	ABC	ABC	ABB	ABC	ABB	AAB	ABB	A	ABB	AAB	ABB	A	AAB	A	ABC	AAB	ABB	AAB	AAB	A	NA	8500PSI.R2	0	4	0	6	6	4	16	20	1	Triploid
2022-PLATE-11_2022-102_320-P3_Fam1_R2_05	Fam1	8500 PSI	A	A	A	A	A	A	A	A	A	A	A	A	A	A	A	A	A	A	A	A	Missing maternal 8-10 loci	8500PSI.R2	0	20	0	0	0	0	0	20	NA	NA
2022-PLATE-11_2022-102_322-P3_Fam1_R2_07	Fam1	8500 PSI	ABC	ABC	ABB	NA	ABB	AAB	NA	NA	AB	AAB	ABB	A	AAB	A	ABC	AAB	ABB	AAB	AAB	AAB	NA	8500PSI.R2	3	2	1	7	4	3	14	20	0.933333	Aneuploid
2022-PLATE-11_2022-102_323-P3_Fam1_R2_08	Fam1	8500 PSI	AB	AB	A	NA	A	A	AB	AB	AB	AB	AB	AB	AB	AB	AB	AB	AB	AB	AB	A	NA	8500PSI.R2	1	4	15	0	0	0	0	20	0	Diploid
2022-PLATE-11_2022-102_324-P3_Fam1_R2_09	Fam1	8500 PSI	AB	AB	AB	AB	AB	A	AB	AB	A	AB	A	AB	AB	AAB	ABC	ABC	AB	ABC	A	AB	NA	8500PSI.R2	0	4	12	1	0	3	4	20	0.25	Aneuploid
2022-PLATE-11_2022-102_325-P3_Fam1_R2_10	Fam1	8500 PSI	ABC	AB	AB	NA	AB	AAB	AB	A	AB	AB	AB	AB	AAB	A	AB	AB	AB	AB	A	AB	NA	8500PSI.R2	1	3	13	2	0	1	3	20	0.1875	Aneuploid
2022-PLATE-11_2022-102_326-P3_Fam1_R2_11	Fam1	8500 PSI	ABB	ABC	ABB	ABC	A	A	AAB	A	ABC	AAB	ABC	AAB	ABC	A	ABC	AAB	ABB	AAB	A	A	NA	8500PSI.R2	0	6	0	5	3	6	14	20	1	Triploid
2022-PLATE-11_2022-102_327-P3_Fam1_R2_12	Fam1	8500 PSI	AB	AB	AB	AB	AAB	AAB	AB	ABB	AB	AB	AB	A	AAB	AAB	AB	AB	ABB	A	AAB	AAB	NA	8500PSI.R2	0	2	10	6	2	0	8	20	0.444444	Aneuploid
2022-PLATE-11_2022-102_328-P3_Fam1_R2_13	Fam1	8500 PSI	ABC	ABC	ABB	NA	ABB	A	AAB	A	ABC	AAB	ABC	AAB	ABC	A	ABC	ABB	ABB	ABC	AAB	A	NA	8500PSI.R2	1	4	0	4	4	7	15	20	1	Triploid
2022-PLATE-11_2022-102_329-P3_Fam1_R2_14	Fam1	8500 PSI	AAB	ABC	A	ABC	ABC	AAB	AAB	A	A	ABB	AAB	A	AAB	AAB	ABC	ABC	ABB	ABC	ABB	AAB	NA	8500PSI.R2	0	4	0	7	3	6	16	20	1	Triploid
2022-PLATE-11_2022-102_330-P3_Fam1_R2_15	Fam1	8500 PSI	A	AB	A	A	A	A	A	A	A	A	A	A	A	A	A	A	A	A	A	A	Missing maternal 8-10 loci	8500PSI.R2	0	19	1	0	0	0	0	20	0	Diploid
2022-PLATE-11_2022-102_331-P3_Fam2_R2_01	Fam2	8500 PSI	AAB	ABC	ABB	NA	NA	NA	ABC	AAB	ABC	ABB	ABB	ABB	ABC	ABB	AAB	AAB	ABC	ABB	AAB	ABB	NA	8500PSI.R2	3	0	0	5	7	5	17	20	1	Triploid
2022-PLATE-11_2022-102_332-P3_Fam2_R2_02	Fam2	8500 PSI	AAB	ABC	AAB	NA	NA	NA	ABC	A	ABC	ABB	ABB	ABC	ABB	A	AAB	AAB	ABC	ABB	A	ABB	NA	8500PSI.R2	3	3	0	4	5	5	14	20	1	Triploid
2022-PLATE-11_2022-102_333-P3_Fam2_R2_03	Fam2	8500 PSI	ABB	ABC	ABB	NA	NA	NA	AAB	ABB	ABC	ABC	ABB	ABB	ABC	AAB	ABB	AAB	ABC	ABB	AAB	ABB	NA	8500PSI.R2	3	0	0	4	8	5	17	20	1	Triploid
2022-PLATE-11_2022-102_334-P3_Fam2_R2_04	Fam2	8500 PSI	ABB	ABC	AB	AB	A	NA	ABC	AB	A	AB	AB	AB	AB	A	AB	AAB	A	ABB	AB	AB	Missing maternal 1-3 loci	8500PSI.R2	1	4	10	1	2	2	5	20	0.333333	Aneuploid
2022-PLATE-11_2022-102_335-P3_Fam2_R2_05	Fam2	8500 PSI	ABB	ABB	ABB	NA	AAB	NA	ABC	ABB	ABC	ABB	ABB	ABB	AAB	ABB	AAB	AAB	ABC	ABB	ABB	ABB	NA	8500PSI.R2	2	0	0	4	11	3	18	20	1	Triploid
2022-PLATE-11_2022-102_336-P3_Fam2_R2_06	Fam2	8500 PSI	ABB	ABC	A	A	NA	A	ABB	AAB	ABC	ABB	ABB	ABB	AAB	ABB	A	AAB	ABC	ABB	A	AAB	NA	8500PSI.R2	1	5	0	4	7	3	14	20	1	Triploid
2022-PLATE-11_2022-102_337-P3_Fam2_R2_07	Fam2	8500 PSI	ABB	ABC	ABB	A	AAB	AAB	ABC	AAB	ABC	ABC	ABB	ABC	ABB	A	A	AAB	ABC	A	ABB	A	NA	8500PSI.R2	0	5	0	4	5	6	15	20	1	Triploid
2022-PLATE-11_2022-102_338-P3_Fam2_R2_08	Fam2	8500 PSI	ABB	ABC	ABC	NA	ABC	AAB	ABC	ABB	NA	NA	ABC	ABB	NA	A	ABB	NA	NA	A	NA	A	NA	8500PSI.R2	7	3	0	1	4	5	10	20	1	Triploid
2022-PLATE-11_2022-102_339-P3_Fam2_R2_09	Fam2	8500 PSI	AAB	ABC	ABC	NA	ABC	A	ABC	ABB	AAB	ABC	ABC	AAB	A	AAB	ABB	AAB	ABC	ABB	A	ABB	NA	8500PSI.R2	1	3	0	5	4	7	16	20	1	Triploid
2022-PLATE-11_2022-102_340-P3_Fam2_R2_10	Fam2	8500 PSI	ABB	ABC	ABB	A	AB	AAB	ABC	A	AAB	ABC	ABC	ABC	ABB	A	A	AAB	AB	ABB	A	ABB	NA	8500PSI.R2	0	5	2	3	5	5	13	20	0.866667	Aneuploid
2022-PLATE-11_2022-102_341-P3_Fam2_R2_11	Fam2	8500 PSI	ABB	ABC	ABC	NA	ABC	AAB	ABC	AAB	ABB	AAB	ABC	ABC	ABB	AAB	ABB	AAB	ABC	ABB	A	ABB	NA	8500PSI.R2	1	1	0	5	6	7	18	20	1	Triploid
2022-PLATE-11_2022-102_342-P3_Fam2_R2_12	Fam2	8500 PSI	ABB	ABC	ABC	NA	AAB	NA	AAB	ABB	NA	ABC	ABC	ABC	AAB	A	ABB	AAB	ABC	ABB	A	A	NA	8500PSI.R2	3	3	0	4	4	6	14	20	1	Triploid
2022-PLATE-11_2022-102_343-P3_Fam2_R2_13	Fam2	8500 PSI	AAB	ABC	ABC	NA	ABC	A	ABC	AAB	ABC	ABB	ABB	ABC	AAB	ABB	ABB	AAB	ABC	ABB	AAB	ABC	NA	8500PSI.R2	1	1	0	5	5	8	18	20	1	Triploid
2022-PLATE-11_2022-102_344-P3_Fam2_R2_14	Fam2	8500 PSI	AB	ABC	AB	A	ABC	A	AAB	AB	AAB	ABC	ABC	A	AB	AB	ABB	AAB	AB	A	AAB	A	NA	8500PSI.R2	0	5	6	4	1	4	9	20	0.6	Aneuploid
2022-PLATE-11_2022-102_345-P3_Fam2_R2_15	Fam2	8500 PSI	ABB	ABC	ABB	NA	ABC	AAB	ABC	ABB	ABC	ABB	ABB	ABC	ABC	A	AAB	AAB	ABC	A	AAB	ABC	NA	8500PSI.R2	1	2	0	4	5	8	17	20	1	Triploid
2022-PLATE-11_2022-102_346-P3_Fam3_R2_01	Fam3	8500 PSI	AAB	ABC	ABC	NA	ABC	A	ABC	ABB	ABC	A	NA	NA	AAB	NA	NA	A	ABC	NA	AAB	NA	NA	8500PSI.R2	7	3	0	3	1	6	10	20	1	Triploid
2022-PLATE-11_2022-102_347-P3_Fam3_R2_02	Fam3	8500 PSI	AAB	ABC	ABC	NA	ABB	AAB	ABC	ABB	ABB	A	ABC	AAB	ABC	A	AAB	A	ABC	ABC	AAB	AAB	NA	8500PSI.R2	1	3	0	6	3	7	16	20	1	Triploid
2022-PLATE-11_2022-102_348-P3_Fam3_R2_03	Fam3	8500 PSI	ABB	ABC	ABC	NA	ABC	NA	ABB	NA	NA	A	ABC	AAB	ABC	A	AAB	AAB	ABC	ABB	ABB	NA	NA	8500PSI.R2	5	2	0	3	4	6	13	20	1	Triploid
2022-PLATE-11_2022-102_349-P3_Fam3_R2_04	Fam3	8500 PSI	ABB	ABC	ABC	NA	ABC	A	ABC	A	ABC	A	ABC	AAB	AAB	A	AAB	A	ABC	ABC	AAB	AAB	NA	8500PSI.R2	1	5	0	5	1	8	14	20	1	Triploid
2022-PLATE-11_2022-102_350-P3_Fam3_R2_05	Fam3	8500 PSI	AAB	ABC	ABC	NA	ABC	NA	ABC	ABB	ABC	A	ABC	ABC	AAB	AAB	AAB	AAB	ABC	ABB	AAB	AAB	NA	8500PSI.R2	2	1	0	7	2	8	17	20	1	Triploid
2022-PLATE-11_2022-102_351-P3_Fam3_R2_06	Fam3	8500 PSI	ABB	ABC	ABC	NA	ABC	A	ABC	ABB	ABB	A	ABC	ABC	AAB	A	AAB	AAB	ABC	ABB	AAB	A	NA	8500PSI.R2	1	4	0	4	4	7	15	20	1	Triploid
2022-PLATE-11_2022-102_352-P3_Fam3_R2_07	Fam3	8500 PSI	AAB	ABC	ABC	NA	ABC	AAB	AAB	ABB	ABC	AAB	ABC	AAB	ABC	AAB	AAB	A	ABC	ABC	A	A	NA	8500PSI.R2	1	3	0	7	1	8	16	20	1	Triploid
2022-PLATE-11_2022-102_353-P3_Fam3_R2_08	Fam3	8500 PSI	ABB	ABC	ABC	NA	ABC	AAB	ABC	ABB	ABC	A	ABC	AAB	ABC	AAB	AAB	AAB	ABC	A	ABB	A	NA	8500PSI.R2	1	3	0	5	3	8	16	20	1	Triploid
2022-PLATE-11_2022-102_354-P3_Fam3_R2_09	Fam3	8500 PSI	AAB	ABC	ABC	NA	ABC	AAB	ABB	NA	ABC	AAB	ABC	ABC	ABC	AAB	AAB	AAB	ABC	ABB	AAB	A	NA	8500PSI.R2	2	1	0	7	2	8	17	20	1	Triploid
2022-PLATE-11_2022-102_355-P3_Fam3_R2_10	Fam3	8500 PSI	AAB	ABC	ABC	ABB	ABC	A	ABC	A	AAB	A	ABC	ABC	AAB	AAB	AAB	A	ABC	ABC	AAB	AAB	NA	8500PSI.R2	0	4	0	7	1	8	16	20	1	Triploid
2022-PLATE-11_2022-102_356-P3_Fam3_R2_11	Fam3	8500 PSI	ABB	ABC	ABC	ABB	ABC	A	ABC	ABB	ABC	AAB	ABC	ABC	ABB	A	AAB	AAB	ABC	ABB	ABB	A	NA	8500PSI.R2	0	3	0	3	6	8	17	20	1	Triploid
2022-PLATE-11_2022-102_357-P3_Fam3_R2_12	Fam3	8500 PSI	ABB	ABC	ABC	NA	ABC	NA	ABC	NA	ABC	AAB	ABC	AAB	AAB	AAB	AAB	AAB	ABC	AAB	ABB	AAB	NA	8500PSI.R2	3	0	0	8	2	7	17	20	1	Triploid
2022-PLATE-11_2022-102_358-P3_Fam3_R2_13	Fam3	8500 PSI	AAB	ABC	ABC	NA	ABC	NA	ABC	A	ABB	A	ABC	ABC	AAB	AAB	AAB	AAB	ABC	ABB	AAB	AAB	NA	8500PSI.R2	2	2	0	7	2	7	16	20	1	Triploid
2022-PLATE-11_2022-102_359-P3_Fam3_R2_14	Fam3	8500 PSI	ABB	ABC	NA	ABB	NA	A	NA	ABB	ABC	AAB	ABC	NA	AAB	A	NA	A	ABC	ABC	ABB	A	NA	8500PSI.R2	5	4	0	2	4	5	11	20	1	Triploid
2022-PLATE-11_2022-102_360-P3_Fam3_R2_15	Fam3	8500 PSI	NA	NA	NA	ABB	NA	AAB	ABC	A	ABC	AAB	ABC	AAB	ABB	AAB	AAB	AAB	ABC	ABB	AAB	AAB	NA	8500PSI.R2	4	1	0	8	3	4	15	20	1	Triploid
2022-PLATE-11_2022-102_361-9500P_Fam1_R1_01	Fam1	9500 PSI	AAB	ABC	A	NA	ABC	NA	AAB	ABB	ABB	AAB	ABC	AAB	ABC	AAB	ABC	ABB	ABB	ABC	ABB	NA	NA	9500PSI.R1	3	1	0	5	5	6	16	20	1	Triploid
2022-PLATE-11_2022-102_362-9500P_Fam1_R1_02	Fam1	9500 PSI	AB	ABC	A	ABC	NA	A	AAB	A	ABB	A	ABB	A	ABC	A	NA	ABC	ABB	ABC	ABB	AAB	NA	9500PSI.R1	2	6	1	2	4	5	11	20	0.916667	Aneuploid
2022-PLATE-11_2022-102_363-9500P_Fam1_R1_03	Fam1	9500 PSI	ABB	ABC	ABB	NA	NA	NA	ABB	ABB	ABB	ABB	ABC	A	ABC	A	ABC	ABC	ABB	ABC	AAB	AAB	NA	9500PSI.R1	3	2	0	2	7	6	15	20	1	Triploid
2022-PLATE-11_2022-102_364-9500P_Fam1_R1_04	Fam1	9500 PSI	AAB	ABC	A	NA	ABB	AAB	ABB	NA	ABC	A	ABC	AAB	AAB	AAB	ABC	ABC	ABB	ABC	A	AAB	NA	9500PSI.R1	2	3	0	6	3	6	15	20	1	Triploid
2022-PLATE-11_2022-102_365-9500P_Fam1_R1_05	Fam1	9500 PSI	AAB	ABC	ABB	NA	ABB	NA	AAB	A	ABC	AAB	ABB	A	ABC	AAB	ABC	ABB	ABB	AAB	ABB	AAB	NA	9500PSI.R1	2	2	0	6	6	4	16	20	1	Triploid
2022-PLATE-11_2022-102_366-9500P_Fam1_R1_06	Fam1	9500 PSI	ABB	ABC	ABB	NA	ABC	A	NA	NA	NA	ABC	ABB	A	ABC	AAB	ABC	A	NA	ABB	AAB	NA	NA	9500PSI.R1	6	3	0	2	4	5	11	20	1	Triploid
2022-PLATE-11_2022-102_367-9500P_Fam1_R1_07	Fam1	9500 PSI	ABC	ABC	ABB	ABC	NA	AAB	ABB	A	ABC	AB	ABC	A	AAB	A	ABC	ABC	ABB	ABC	AAB	A	NA	9500PSI.R1	1	4	1	3	3	8	14	20	0.933333	Aneuploid
2022-PLATE-11_2022-102_368-9500P_Fam1_R1_08	Fam1	9500 PSI	ABC	ABC	A	ABC	ABC	AAB	ABB	ABB	ABC	AAB	ABC	AAB	AAB	A	ABC	ABB	ABB	AAB	AAB	A	NA	9500PSI.R1	0	3	0	6	4	7	17	20	1	Triploid
2022-PLATE-11_2022-102_369-9500P_Fam1_R1_09	Fam1	9500 PSI	ABC	ABC	A	ABC	NA	AAB	NA	A	ABC	ABC	ABC	A	AAB	AAB	ABC	A	ABB	AAB	ABB	AAB	NA	9500PSI.R1	2	4	0	5	2	7	14	20	1	Triploid
2022-PLATE-11_2022-102_370-9500P_Fam1_R1_10	Fam1	9500 PSI	ABB	ABC	ABB	ABC	NA	AAB	AAB	ABB	ABC	AAB	ABC	AAB	AAB	AAB	ABC	AAB	ABB	AAB	NA	AAB	NA	9500PSI.R1	2	0	0	9	4	5	18	20	1	Triploid
2022-PLATE-11_2022-102_371-9500P_Fam1_R1_11	Fam1	9500 PSI	AAB	ABC	A	ABC	ABB	A	AAB	ABB	ABB	ABC	ABB	AAB	ABC	AAB	ABC	AAB	ABB	ABB	A	AAB	NA	9500PSI.R1	0	3	0	6	6	5	17	20	1	Triploid
2022-PLATE-11_2022-102_372-9500P_Fam1_R1_12	Fam1	9500 PSI	ABC	AB	A	NA	NA	NA	AB	A	AB	AB	AB	AAB	NA	A	AB	ABB	ABB	NA	AB	A	NA	9500PSI.R1	5	4	7	1	2	1	4	20	0.363636	Aneuploid
2022-PLATE-11_2022-102_373-9500P_Fam1_R1_13	Fam1	9500 PSI	AAB	ABC	A	ABC	ABB	AAB	ABB	ABB	AAB	A	ABB	AAB	AAB	A	ABC	A	ABB	AAB	ABB	A	NA	9500PSI.R1	0	5	0	6	6	3	15	20	1	Triploid
2022-PLATE-11_2022-102_374-9500P_Fam1_R1_14	Fam1	9500 PSI	AAB	ABC	ABB	ABC	ABC	A	NA	NA	NA	AAB	A	AAB	ABC	AAB	ABC	ABC	ABB	ABC	ABB	A	NA	9500PSI.R1	3	3	0	4	3	7	14	20	1	Triploid
2022-PLATE-11_2022-102_375-9500P_Fam1_R1_15	Fam1	9500 PSI	ABC	ABC	ABB	ABC	NA	AAB	ABB	A	ABB	AAB	ABC	A	AAB	A	ABC	ABB	ABB	ABB	AAB	A	NA	9500PSI.R1	1	4	0	4	6	5	15	20	1	Triploid
2022-PLATE-11_2022-102_376-9500P_Fam2_R1_01	Fam2	9500 PSI	ABB	ABC	ABC	A	NA	AAB	NA	ABB	NA	ABC	ABB	ABB	ABC	ABB	ABB	AAB	ABC	A	A	ABB	NA	9500PSI.R1	3	3	0	2	7	5	14	20	1	Triploid
2022-PLATE-12_2022-102_377-9500P_Fam2_R1_02	Fam2	9500 PSI	ABB	ABC	ABB	NA	ABC	NA	ABC	AAB	AAB	ABB	ABB	ABB	AAB	AAB	ABB	AAB	ABC	A	A	A	NA	9500PSI.R1	2	3	0	5	6	4	15	20	1	Triploid
2022-PLATE-12_2022-102_378-9500P_Fam2_R1_03	Fam2	9500 PSI	AAB	ABC	ABB	A	ABC	NA	ABC	A	ABC	ABB	ABB	ABC	AAB	A	AAB	AAB	ABC	A	A	A	NA	9500PSI.R1	1	6	0	4	3	6	13	20	1	Triploid
2022-PLATE-12_2022-102_379-9500P_Fam2_R1_04	Fam2	9500 PSI	ABB	ABC	ABC	NA	ABC	A	ABC	AAB	AAB	A	ABC	AAB	AAB	A	ABB	AAB	ABC	ABB	AAB	ABB	NA	9500PSI.R1	1	3	0	6	4	6	16	20	1	Triploid
2022-PLATE-12_2022-102_380-9500P_Fam2_R1_05	Fam2	9500 PSI	ABB	ABC	ABB	NA	ABC	AAB	ABC	ABB	ABC	A	ABB	ABB	ABB	AAB	ABB	AAB	ABC	ABB	ABB	A	NA	9500PSI.R1	1	2	0	3	9	5	17	20	1	Triploid
2022-PLATE-12_2022-102_381-9500P_Fam2_R1_06	Fam2	9500 PSI	ABB	ABC	ABB	NA	ABC	AAB	ABC	ABB	ABC	ABB	ABB	ABB	ABC	A	A	AAB	ABC	A	AAB	AAB	NA	9500PSI.R1	1	3	0	4	6	6	16	20	1	Triploid
2022-PLATE-12_2022-102_382-9500P_Fam2_R1_07	Fam2	9500 PSI	AAB	ABC	ABC	NA	ABB	A	ABC	AAB	A	ABB	ABC	ABB	A	ABB	ABB	AAB	ABC	ABB	AAB	ABB	NA	9500PSI.R1	1	3	0	4	7	5	16	20	1	Triploid
2022-PLATE-12_2022-102_383-9500P_Fam2_R1_08	Fam2	9500 PSI	ABB	ABC	ABB	NA	AAB	AAB	NA	NA	NA	A	ABC	ABB	ABC	AAB	ABB	AAB	ABC	ABB	ABB	A	NA	9500PSI.R1	4	2	0	4	6	4	14	20	1	Triploid
2022-PLATE-12_2022-102_384-9500P_Fam2_R1_09	Fam2	9500 PSI	ABB	ABC	ABB	NA	AAB	AAB	ABC	ABB	ABC	ABC	ABB	ABC	ABC	A	ABB	AAB	ABC	ABB	A	ABC	NA	9500PSI.R1	1	2	0	3	6	8	17	20	1	Triploid
2022-PLATE-12_2022-102_385-9500P_Fam2_R1_10	Fam2	9500 PSI	AAB	ABC	ABB	NA	ABC	NA	AAB	AAB	AAB	ABB	ABC	ABB	AAB	A	AAB	AAB	ABC	ABB	A	AAB	NA	9500PSI.R1	2	2	0	8	4	4	16	20	1	Triploid
2022-PLATE-12_2022-102_386-9500P_Fam2_R1_11	Fam2	9500 PSI	ABB	ABC	ABB	NA	ABC	NA	ABC	AAB	AAB	ABB	ABC	ABC	AAB	ABB	ABB	AAB	ABC	A	AAB	ABB	NA	9500PSI.R1	2	1	0	5	6	6	17	20	1	Triploid
2022-PLATE-12_2022-102_387-9500P_Fam2_R1_12	Fam2	9500 PSI	ABC	ABC	ABB	NA	ABC	AAB	AB	ABB	ABC	ABB	ABB	ABB	ABC	A	ABB	AAB	ABC	ABB	ABB	A	bp shift	9500PSI.R1	1	2	1	2	8	6	16	20	0.941176	Aneuploid
2022-PLATE-12_2022-102_388-9500P_Fam2_R1_13	Fam2	9500 PSI	ABB	ABC	ABC	NA	ABC	NA	ABC	AAB	ABC	ABB	ABB	ABB	AAB	A	A	AAB	ABC	A	ABB	ABB	NA	9500PSI.R1	2	3	0	3	6	6	15	20	1	Triploid
2022-PLATE-12_2022-102_389-9500P_Fam2_R1_14	Fam2	9500 PSI	AAB	ABC	ABC	NA	ABC	NA	ABC	ABB	ABC	ABB	ABB	ABB	A	A	ABB	AAB	ABC	ABB	AAB	ABB	NA	9500PSI.R1	2	2	0	3	7	6	16	20	1	Triploid
2022-PLATE-12_2022-102_390-9500P_Fam2_R1_15	Fam2	9500 PSI	ABB	ABC	ABB	NA	ABC	NA	ABC	ABB	ABC	ABB	ABB	ABC	AAB	ABB	A	AAB	ABC	ABB	AAB	ABB	NA	9500PSI.R1	2	1	0	3	8	6	17	20	1	Triploid
2022-PLATE-12_2022-102_391-9500P_Fam3_R1_01	Fam3	9500 PSI	ABB	ABC	ABC	NA	ABC	NA	ABC	A	AAB	AAB	ABC	AAB	ABC	AAB	AAB	A	ABC	AAB	AAB	AAB	NA	9500PSI.R1	2	2	0	8	1	7	16	20	1	Triploid
2022-PLATE-12_2022-102_392-9500P_Fam3_R1_02	Fam3	9500 PSI	ABB	ABC	ABC	ABB	ABC	A	ABC	ABB	ABC	A	ABC	ABB	A	A	AAB	A	ABC	ABC	AAB	A	NA	9500PSI.R1	0	6	0	2	4	8	14	20	1	Triploid
2022-PLATE-12_2022-102_393-9500P_Fam3_R1_03	Fam3	9500 PSI	AAB	ABC	ABC	NA	ABC	NA	ABB	A	ABC	AAB	ABC	AAB	AAB	A	AAB	AAB	ABC	ABB	ABB	AAB	NA	9500PSI.R1	2	2	0	7	3	6	16	20	1	Triploid
2022-PLATE-12_2022-102_394-9500P_Fam3_R1_04	Fam3	9500 PSI	ABB	ABC	ABC	ABB	NA	A	NA	ABB	NA	NA	ABC	NA	AAB	NA	NA	AAB	ABC	ABB	A	AAB	NA	9500PSI.R1	7	2	0	3	4	4	11	20	1	Triploid
2022-PLATE-12_2022-102_397-9500P_Fam3_R1_07	Fam3	9500 PSI	ABB	ABC	ABC	ABB	NA	AAB	NA	A	NA	A	ABC	NA	ABC	NA	NA	A	ABC	NA	A	NA	NA	9500PSI.R1	8	4	0	1	2	5	8	20	1	Triploid
2022-PLATE-12_2022-102_398-9500P_Fam3_R1_08	Fam3	9500 PSI	ABB	ABC	ABC	ABB	ABC	A	ABC	ABB	AAB	AAB	ABC	AAB	AAB	AAB	AAB	A	ABC	ABC	AAB	A	NA	9500PSI.R1	0	3	0	7	3	7	17	20	1	Triploid
2022-PLATE-12_2022-102_399-9500P_Fam3_R1_09	Fam3	9500 PSI	ABB	ABC	ABC	NA	ABC	NA	ABB	A	ABC	AAB	ABC	ABC	ABB	AAB	AAB	AAB	ABC	ABB	ABB	A	NA	9500PSI.R1	2	2	0	4	5	7	16	20	1	Triploid
2022-PLATE-12_2022-102_400-9500P_Fam3_R1_10	Fam3	9500 PSI	ABB	ABC	ABC	ABB	ABC	A	ABC	ABB	ABC	A	ABC	ABC	AAB	AAB	AAB	A	ABC	AAB	AAB	A	NA	9500PSI.R1	0	4	0	5	3	8	16	20	1	Triploid
2022-PLATE-12_2022-102_401-9500P_Fam3_R1_11	Fam3	9500 PSI	ABB	ABC	ABC	NA	ABC	AAB	ABC	A	ABC	AAB	ABC	AAB	ABC	AAB	AAB	AAB	ABC	A	AAB	A	NA	9500PSI.R1	1	3	0	7	1	8	16	20	1	Triploid
2022-PLATE-12_2022-102_402-9500P_Fam3_R1_12	Fam3	9500 PSI	AAB	ABC	ABC	NA	ABC	NA	ABC	ABB	AAB	AAB	AAB	ABC	ABC	A	AAB	A	ABC	ABC	A	AAB	NA	9500PSI.R1	2	3	0	6	1	8	15	20	1	Triploid
2022-PLATE-12_2022-102_403-9500P_Fam3_R1_13	Fam3	9500 PSI	AAB	ABC	ABC	NA	ABC	NA	ABC	A	ABC	A	ABC	ABC	A	AAB	AAB	A	ABC	ABC	ABB	A	NA	9500PSI.R1	2	5	0	3	1	9	13	20	1	Triploid
2022-PLATE-12_2022-102_404-9500P_Fam3_R1_14	Fam3	9500 PSI	AAB	ABC	ABC	ABB	ABC	A	AAB	A	ABB	AAB	ABC	AAB	ABB	AAB	AAB	AAB	ABC	AAB	AAB	AAB	NA	9500PSI.R1	0	2	0	10	3	5	18	20	1	Triploid
2022-PLATE-12_2022-102_405-9500P_Fam3_R1_15	Fam3	9500 PSI	ABB	ABC	ABC	NA	ABC	AAB	ABC	A	ABB	AAB	ABC	ABC	ABB	A	AAB	AAB	ABC	ABB	AAB	A	NA	9500PSI.R1	1	3	0	5	4	7	16	20	1	Triploid
2022-PLATE-12_2022-102_406-9500P_Fam1_R2_01	Fam1	9500 PSI	ABC	ABB	A	ABC	ABC	AAB	ABB	A	ABC	AAB	ABC	A	AAB	AAB	ABB	ABB	ABB	ABB	ABB	AAB	NA	9500PSI.R2	0	3	0	5	7	5	17	20	1	Triploid
2022-PLATE-12_2022-102_407-9500P_Fam1_R2_02	Fam1	9500 PSI	AAB	ABC	ABB	ABC	ABB	A	AAB	ABB	ABC	AAB	ABC	AAB	ABC	AAB	ABC	ABC	ABB	ABC	AAB	AAB	NA	9500PSI.R2	0	1	0	7	4	8	19	20	1	Triploid
2022-PLATE-12_2022-102_408-9500P_Fam1_R2_03	Fam1	9500 PSI	ABC	ABC	A	ABC	ABC	A	AAB	A	ABB	ABC	ABB	A	ABC	AAB	ABC	ABC	ABB	ABC	AAB	AAB	NA	9500PSI.R2	0	4	0	4	3	9	16	20	1	Triploid
2022-PLATE-12_2022-102_409-9500P_Fam1_R2_04	Fam1	9500 PSI	ABC	ABC	ABB	ABC	ABC	AAB	AAB	ABB	ABC	AAB	ABC	A	AAB	AAB	ABC	ABB	ABB	ABB	ABB	A	bp shift	9500PSI.R2	0	2	0	5	6	7	18	20	1	Triploid
2022-PLATE-12_2022-102_410-9500P_Fam1_R2_05	Fam1	9500 PSI	AAB	ABC	A	ABC	NA	AAB	NA	ABB	ABB	ABC	ABB	AAB	AAB	A	ABC	ABC	ABB	ABC	A	AAB	NA	9500PSI.R2	2	3	0	5	4	6	15	20	1	Triploid
2022-PLATE-12_2022-102_412-9500P_Fam1_R2_07	Fam1	9500 PSI	ABC	ABC	ABB	NA	ABB	NA	AAB	A	ABB	ABC	ABB	A	ABC	AAB	AAB	ABC	ABB	ABC	AAB	AAB	NA	9500PSI.R2	2	2	0	5	5	6	16	20	1	Triploid
2022-PLATE-12_2022-102_413-9500P_Fam1_R2_08	Fam1	9500 PSI	AAB	ABC	A	ABC	ABC	AAB	AAB	A	ABC	AAB	ABC	AAB	AAB	A	ABC	ABC	ABB	ABC	AAB	AAB	NA	9500PSI.R2	0	3	0	8	1	8	17	20	1	Triploid
2022-PLATE-12_2022-102_414-9500P_Fam1_R2_09	Fam1	9500 PSI	ABC	ABB	ABB	ABC	ABB	AAB	AAB	ABB	ABB	ABC	ABB	AAB	AAB	AAB	ABC	ABB	ABB	ABB	A	AAB	NA	9500PSI.R2	0	1	0	6	9	4	19	20	1	Triploid
2022-PLATE-12_2022-102_415-9500P_Fam1_R2_10	Fam1	9500 PSI	ABB	ABC	ABB	ABC	ABB	NA	AAB	ABB	ABC	AAB	ABC	A	ABC	A	ABC	AAB	ABB	ABC	ABB	AAB	NA	9500PSI.R2	1	2	0	4	6	7	17	20	1	Triploid
2022-PLATE-12_2022-102_416-9500P_Fam1_R2_11	Fam1	9500 PSI	ABC	ABC	ABB	ABC	ABB	A	AAB	A	ABC	AAB	ABC	A	ABC	A	ABC	ABB	ABB	ABB	AAB	AAB	NA	9500PSI.R2	0	4	0	4	5	7	16	20	1	Triploid
2022-PLATE-12_2022-102_417-9500P_Fam1_R2_12	Fam1	9500 PSI	ABC	ABC	ABB	ABC	ABC	A	AAB	A	ABB	ABB	ABB	AAB	ABC	AAB	ABC	ABC	ABB	ABC	AAB	A	NA	9500PSI.R2	0	3	0	4	5	8	17	20	1	Triploid
2022-PLATE-12_2022-102_418-9500P_Fam1_R2_13	Fam1	9500 PSI	ABB	ABC	ABB	ABC	NA	AAB	NA	A	NA	AAB	ABC	NA	AAB	NA	NA	AAB	ABB	NA	AAB	A	NA	9500PSI.R2	7	2	0	5	3	3	11	20	1	Triploid
2022-PLATE-12_2022-102_419-9500P_Fam1_R2_14	Fam1	9500 PSI	ABC	ABC	ABB	ABC	ABB	AAB	AAB	A	ABB	ABC	ABB	A	AAB	A	ABC	ABB	ABB	ABB	AAB	A	NA	9500PSI.R2	0	4	0	4	7	5	16	20	1	Triploid
2022-PLATE-12_2022-102_420-9500P_Fam1_R2_15	Fam1	9500 PSI	ABC	ABC	A	ABC	ABC	NA	ABB	A	ABC	AAB	ABC	A	ABC	A	ABB	AAB	ABB	A	AAB	AAB	NA	9500PSI.R2	1	5	0	4	3	7	14	20	1	Triploid
2022-PLATE-12_2022-102_421-9500P_Fam2_R2_01	Fam2	9500 PSI	AAB	ABC	ABC	NA	AAB	A	ABC	ABB	AAB	ABC	ABC	AB	A	A	ABB	AAB	ABC	ABB	AAB	ABC	NA	9500PSI.R2	1	3	1	5	3	7	15	20	0.9375	Aneuploid
2022-PLATE-12_2022-102_422-9500P_Fam2_R2_02	Fam2	9500 PSI	AAB	ABC	ABB	NA	ABC	A	ABC	AAB	ABC	ABB	ABB	ABC	AAB	ABB	ABB	AAB	ABC	A	AAB	A	NA	9500PSI.R2	1	3	0	5	5	6	16	20	1	Triploid
2022-PLATE-12_2022-102_423-9500P_Fam2_R2_03	Fam2	9500 PSI	ABB	ABC	ABB	NA	ABC	AAB	AB	ABB	AAB	ABB	ABC	ABB	ABC	A	ABB	AAB	ABC	A	ABB	ABB	NA	9500PSI.R2	1	2	1	3	8	5	16	20	0.941176	Aneuploid
2022-PLATE-12_2022-102_424-9500P_Fam2_R2_04	Fam2	9500 PSI	AAB	ABB	ABB	NA	ABC	NA	ABC	A	ABC	ABB	ABB	ABB	ABB	AAB	A	AAB	ABC	ABB	AAB	ABB	NA	9500PSI.R2	2	2	0	4	8	4	16	20	1	Triploid
2022-PLATE-12_2022-102_425-9500P_Fam2_R2_05	Fam2	9500 PSI	ABB	ABC	ABC	NA	ABC	AAB	ABC	A	A	ABB	ABC	ABB	ABB	A	A	AAB	ABC	A	A	ABC	NA	9500PSI.R2	1	6	0	2	4	7	13	20	1	Triploid
2022-PLATE-12_2022-102_426-9500P_Fam2_R2_06	Fam2	9500 PSI	ABB	ABB	ABB	NA	ABC	NA	ABB	AAB	AAB	ABB	ABC	A	ABB	ABB	A	AAB	ABC	A	AAB	ABC	NA	9500PSI.R2	2	3	0	4	7	4	15	20	1	Triploid
2022-PLATE-12_2022-102_427-9500P_Fam2_R2_07	Fam2	9500 PSI	AAB	ABC	ABC	NA	ABC	AAB	ABC	AAB	AAB	ABB	ABB	AAB	ABC	A	ABB	AAB	ABC	ABB	AAB	ABB	NA	9500PSI.R2	1	1	0	7	5	6	18	20	1	Triploid
2022-PLATE-12_2022-102_428-9500P_Fam2_R2_08	Fam2	9500 PSI	ABB	AB	A	NA	AB	NA	ABC	AB	AB	AB	AB	A	AB	A	AB	AB	AB	AB	AB	ABB	NA	9500PSI.R2	2	3	12	0	2	1	3	20	0.2	Aneuploid
2022-PLATE-12_2022-102_429-9500P_Fam2_R2_09	Fam2	9500 PSI	ABB	AB	AB	NA	AAB	AAB	ABC	AAB	AAB	ABC	ABC	AB	ABC	AB	ABB	AAB	ABC	A	A	AB	NA	9500PSI.R2	1	2	5	5	2	5	12	20	0.705882	Aneuploid
2022-PLATE-12_2022-102_430-9500P_Fam2_R2_10	Fam2	9500 PSI	AAB	ABC	AAB	NA	ABC	AB	AB	A	AAB	ABC	ABC	ABB	AB	A	A	AAB	ABC	A	A	AB	NA	9500PSI.R2	1	5	4	4	1	5	10	20	0.714286	Aneuploid
2022-PLATE-12_2022-102_431-9500P_Fam2_R2_11	Fam2	9500 PSI	ABB	AAB	ABB	A	ABB	AAB	AAB	ABB	AAB	A	ABB	AAB	ABC	A	ABB	AAB	ABC	ABB	AAB	A	NA	9500PSI.R2	0	4	0	7	7	2	16	20	1	Triploid
2022-PLATE-12_2022-102_432-9500P_Fam2_R2_12	Fam2	9500 PSI	AAB	ABC	ABC	NA	ABC	NA	AAB	AAB	ABB	ABB	ABC	ABC	A	A	ABB	AAB	ABC	A	A	AAB	NA	9500PSI.R2	2	4	0	5	3	6	14	20	1	Triploid
2022-PLATE-12_2022-102_433-9500P_Fam2_R2_13	Fam2	9500 PSI	ABB	ABC	ABB	NA	ABC	NA	ABC	ABB	AAB	A	ABB	ABC	AAB	A	ABB	AAB	ABC	ABB	ABB	AAB	NA	9500PSI.R2	2	2	0	4	7	5	16	20	1	Triploid
2022-PLATE-12_2022-102_434-9500P_Fam2_R2_14	Fam2	9500 PSI	AAB	ABC	AB	NA	ABC	AAB	ABC	AAB	ABB	ABB	ABC	A	ABC	ABB	A	AAB	ABC	A	AAB	AAB	NA	9500PSI.R2	1	3	1	6	3	6	15	20	0.9375	Aneuploid
2022-PLATE-12_2022-102_435-9500P_Fam2_R2_15	Fam2	9500 PSI	ABB	ABC	ABB	NA	ABC	AAB	ABC	A	AAB	ABC	ABC	ABC	ABC	ABB	ABB	AAB	ABC	ABB	AAB	A	NA	9500PSI.R2	1	2	0	4	5	8	17	20	1	Triploid
2022-PLATE-12_2022-102_436-9500P_Fam3_R2_01	Fam3	9500 PSI	AAB	ABC	ABC	ABB	NA	AAB	NA	A	ABB	NA	ABB	ABB	ABC	A	AAB	A	ABC	ABC	A	A	NA	9500PSI.R2	3	5	0	3	4	5	12	20	1	Triploid
2022-PLATE-12_2022-102_438-9500P_Fam3_R2_03	Fam3	9500 PSI	AAB	ABC	ABC	ABB	ABC	AAB	ABC	ABB	ABC	A	ABC	ABC	ABC	AAB	AAB	AAB	ABC	ABB	AAB	A	NA	9500PSI.R2	0	2	0	6	3	9	18	20	1	Triploid
2022-PLATE-12_2022-102_439-9500P_Fam3_R2_04	Fam3	9500 PSI	ABB	ABC	ABC	NA	ABC	AAB	ABC	A	ABC	A	ABC	ABC	ABC	AAB	AAB	AAB	ABC	A	ABB	A	NA	9500PSI.R2	1	4	0	4	2	9	15	20	1	Triploid
2022-PLATE-12_2022-102_440-9500P_Fam3_R2_05	Fam3	9500 PSI	AAB	ABC	ABC	NA	ABC	AAB	ABC	A	ABC	AAB	ABC	ABC	ABC	AAB	AAB	A	ABC	ABC	AAB	A	NA	9500PSI.R2	1	3	0	6	0	10	16	20	1	Triploid
2022-PLATE-12_2022-102_441-9500P_Fam3_R2_06	Fam3	9500 PSI	ABB	ABC	ABC	ABB	ABC	AAB	ABC	A	AAB	A	ABC	AAB	ABC	AAB	AAB	A	ABC	ABC	AAB	AAB	NA	9500PSI.R2	0	3	0	7	2	8	17	20	1	Triploid
2022-PLATE-12_2022-102_442-9500P_Fam3_R2_07	Fam3	9500 PSI	AAB	ABC	ABC	ABB	ABC	A	ABC	A	ABC	AAB	ABC	AAB	AAB	A	AAB	AAB	ABC	A	ABB	A	NA	9500PSI.R2	0	5	0	6	2	7	15	20	1	Triploid
2022-PLATE-12_2022-102_443-9500P_Fam3_R2_08	Fam3	9500 PSI	AAB	ABC	ABC	NA	ABC	AAB	ABB	A	ABC	A	ABC	ABC	ABC	AAB	AAB	AAB	ABC	ABB	AAB	A	NA	9500PSI.R2	1	3	0	6	2	8	16	20	1	Triploid
2022-PLATE-12_2022-102_444-9500P_Fam3_R2_09	Fam3	9500 PSI	ABB	ABC	ABC	NA	ABC	NA	ABC	A	AAB	AAB	ABC	ABC	ABC	A	AAB	A	ABC	ABC	A	AAB	NA	9500PSI.R2	2	4	0	4	1	9	14	20	1	Triploid
2022-PLATE-12_2022-102_445-9500P_Fam3_R2_10	Fam3	9500 PSI	ABB	ABC	ABC	NA	ABC	AAB	ABC	A	ABC	A	ABC	ABC	ABC	A	AAB	AAB	ABC	ABB	AAB	A	NA	9500PSI.R2	1	4	0	4	2	9	15	20	1	Triploid
2022-PLATE-12_2022-102_446-9500P_Fam3_R2_11	Fam3	9500 PSI	AAB	ABC	ABC	NA	ABC	NA	ABC	A	AAB	A	ABC	ABC	ABB	A	AAB	AAB	ABC	ABB	AAB	AAB	NA	9500PSI.R2	2	3	0	6	2	7	15	20	1	Triploid
2022-PLATE-12_2022-102_447-9500P_Fam3_R2_12	Fam3	9500 PSI	AAB	ABC	ABC	NA	ABC	A	ABC	ABB	ABC	A	ABC	AAB	AAB	A	AAB	A	ABC	ABC	AAB	A	NA	9500PSI.R2	1	5	0	5	1	8	14	20	1	Triploid
2022-PLATE-12_2022-102_448-9500P_Fam3_R2_13	Fam3	9500 PSI	AAB	ABC	ABC	NA	ABC	NA	ABC	A	ABC	A	ABC	AAB	AAB	A	AAB	A	ABC	ABC	ABB	A	NA	9500PSI.R2	2	5	0	4	1	8	13	20	1	Triploid
2022-PLATE-12_2022-102_449-9500P_Fam3_R2_14	Fam3	9500 PSI	ABB	ABC	ABC	NA	ABC	NA	ABC	ABB	AAB	AAB	ABC	AAB	AAB	AAB	AAB	A	ABC	ABC	AAB	A	NA	9500PSI.R2	2	2	0	7	2	7	16	20	1	Triploid
2022-PLATE-12_2022-102_450-9500P_Fam3_R2_15	Fam3	9500 PSI	AAB	ABC	ABC	NA	ABC	NA	ABC	A	AAB	AAB	ABC	ABC	AAB	AAB	AAB	AAB	ABC	ABB	AAB	A	NA	9500PSI.R2	2	2	0	8	1	7	16	20	1	Triploid
2022-PLATE-3_2022-102_10-0P_Fam1_R1_10	Fam1	0 PSI	AB	AB	AB	AB	AB	AB	AB	A	AB	AB	AB	A	AB	A	AB	A	AB	AB	A	AB	NA	0PSI.R1	0	5	15	0	0	0	0	20	0	Diploid
2022-PLATE-3_2022-102_1-0P_Fam1_R1_01	Fam1	0 PSI	AB	AB	AB	AB	A	AB	AB	AB	NA	AB	AAB	A	A	A	AB	AAB	AB	AB	A	AB	2 paternal	0PSI.R1	1	5	12	2	0	0	2	20	0.142857	Aneuploid
2022-PLATE-3_2022-102_11-0P_Fam1_R1_11	Fam1	0 PSI	AB	AB	AB	AB	AB	A	AB	A	AB	AB	AB	A	AB	A	AB	AB	AB	AB	AB	AB	NA	0PSI.R1	0	4	16	0	0	0	0	20	0	Diploid
2022-PLATE-3_2022-102_12-0P_Fam1_R1_12	Fam1	0 PSI	AB	AB	A	AB	NA	AB	AB	A	AB	A	AB	NA	A	A	AB	A	AB	AB	A	A	NA	0PSI.R1	2	8	10	0	0	0	0	20	0	Diploid
2022-PLATE-3_2022-102_13-0P_Fam1_R1_13	Fam1	0 PSI	AB	AB	AB	NA	A	AB	AB	A	A	AB	AB	AB	A	AB	AB	AB	AB	AB	AB	A	NA	0PSI.R1	1	5	14	0	0	0	0	20	0	Diploid
2022-PLATE-3_2022-102_14-0P_Fam1_R1_14	Fam1	0 PSI	AB	AB	AB	NA	AB	NA	AB	AB	AB	A	NA	AB	AB	AB	AB	A	AB	AB	A	AB	NA	0PSI.R1	3	3	14	0	0	0	0	20	0	Diploid
2022-PLATE-3_2022-102_15-0P_Fam1_R1_15	Fam1	0 PSI	AB	AB	AB	AB	AB	AB	AB	AB	AB	AB	AB	A	AB	AB	AB	AB	AB	AB	AB	AB	NA	0PSI.R1	0	1	19	0	0	0	0	20	0	Diploid
2022-PLATE-3_2022-102_16-0P_Fam2_R1_01	Fam2	0 PSI	AB	AB	AB	NA	AB	AB	AB	AB	NA	A	A	AB	AB	A	A	AB	AB	AB	A	A	NA	0PSI.R1	2	6	12	0	0	0	0	20	0	Diploid
2022-PLATE-3_2022-102_17-0P_Fam2_R1_02	Fam2	0 PSI	AB	AB	AB	A	AB	NA	NA	NA	NA	A	AB	AB	AB	AB	A	AAB	AB	AB	AB	AB	NA	0PSI.R1	4	3	12	1	0	0	1	20	0.0769231	Aneuploid
2022-PLATE-3_2022-102_18-0P_Fam2_R1_03	Fam2	0 PSI	AB	AB	A	NA	AB	AB	AB	A	AB	AB	A	AB	AB	AB	A	AB	AB	AB	A	AB	NA	0PSI.R1	1	5	14	0	0	0	0	20	0	Diploid
2022-PLATE-3_2022-102_19-0P_Fam2_R1_04	Fam2	0 PSI	AB	AB	A	A	AB	A	AB	A	AB	AB	AB	AB	AB	AB	AB	AB	AB	A	A	AB	NA	0PSI.R1	0	6	14	0	0	0	0	20	0	Diploid
2022-PLATE-3_2022-102_20-0P_Fam2_R1_05	Fam2	0 PSI	AB	AB	AB	NA	AB	A	AB	NA	NA	A	A	AB	AB	AB	A	AB	AB	A	A	AB	NA	0PSI.R1	3	6	11	0	0	0	0	20	0	Diploid
2022-PLATE-3_2022-102_2-0P_Fam1_R1_02	Fam1	0 PSI	AB	AB	A	NA	AB	NA	AB	NA	NA	AB	AB	AB	AB	AB	AB	A	NA	AB	AB	AB	NA	0PSI.R1	5	2	13	0	0	0	0	20	0	Diploid
2022-PLATE-3_2022-102_21-0P_Fam2_R1_06	Fam2	0 PSI	AB	AB	AB	NA	AB	A	AB	A	AB	A	AB	AB	A	AB	A	AB	AB	AB	A	AB	NA	0PSI.R1	1	6	13	0	0	0	0	20	0	Diploid
2022-PLATE-3_2022-102_22-0P_Fam2_R1_07	Fam2	0 PSI	AB	ABB	AB	A	NA	A	AB	A	AB	AB	AB	AB	AB	AB	A	AB	AB	AB	AB	NA	2 paternal	0PSI.R1	2	4	13	0	1	0	1	20	0.0714286	Aneuploid
2022-PLATE-3_2022-102_23-0P_Fam2_R1_08	Fam2	0 PSI	AB	AB	AB	NA	AB	AB	AB	AB	A	A	AB	AB	AB	A	AB	NA	AB	AB	AB	A	NA	0PSI.R1	2	4	14	0	0	0	0	20	0	Diploid
2022-PLATE-3_2022-102_24-0P_Fam2_R1_09	Fam2	0 PSI	AB	AB	AB	NA	AB	AB	AB	AB	AB	AB	AB	AB	AB	AB	A	AB	AB	A	AB	NA	NA	0PSI.R1	2	2	16	0	0	0	0	20	0	Diploid
2022-PLATE-3_2022-102_25-0P_Fam2_R1_10	Fam2	0 PSI	AB	AB	AB	A	NA	AB	AB	A	NA	A	AB	NA	AB	NA	NA	ABB	AB	NA	AB	AB	2 paternal	0PSI.R1	6	3	10	0	1	0	1	20	0.0909091	Aneuploid
2022-PLATE-3_2022-102_26-0P_Fam2_R1_11	Fam2	0 PSI	AB	AB	A	NA	AB	AB	AB	AB	A	AB	AB	AB	AB	A	A	AB	AB	AB	A	A	NA	0PSI.R1	1	6	13	0	0	0	0	20	0	Diploid
2022-PLATE-3_2022-102_28-0P_Fam2_R1_13	Fam2	0 PSI	AB	AB	AB	NA	AB	AB	AB	AB	AB	AB	AB	AB	AB	A	A	AB	AB	A	A	A	NA	0PSI.R1	1	5	14	0	0	0	0	20	0	Diploid
2022-PLATE-3_2022-102_30-0P_Fam2_R1_15	Fam2	0 PSI	AB	AB	AB	NA	AB	A	AB	A	NA	AB	AB	A	AB	AB	A	AB	AB	AB	A	AB	NA	0PSI.R1	2	5	13	0	0	0	0	20	0	Diploid
2022-PLATE-3_2022-102_3-0P_Fam1_R1_03	Fam1	0 PSI	AB	AB	AB	NA	AB	AB	AB	NA	NA	AB	A	A	A	AB	AB	AB	AB	AB	A	A	NA	0PSI.R1	3	5	12	0	0	0	0	20	0	Diploid
2022-PLATE-3_2022-102_31-0P_Fam3_R1_01	Fam3	0 PSI	AB	AB	AB	NA	AB	NA	AB	AB	AB	A	AB	AB	A	A	AB	AB	AB	A	AB	A	NA	0PSI.R1	2	5	13	0	0	0	0	20	0	Diploid
2022-PLATE-3_2022-102_32-0P_Fam3_R1_02	Fam3	0 PSI	AB	AB	AB	AB	AB	A	AB	A	AB	A	AB	A	AB	AB	AB	A	AB	AB	AB	A	NA	0PSI.R1	0	6	14	0	0	0	0	20	0	Diploid
2022-PLATE-3_2022-102_34-0P_Fam3_R1_04	Fam3	0 PSI	AB	AB	AB	NA	AB	AB	NA	NA	NA	A	AB	AB	NA	AB	AB	A	AB	AB	AB	A	NA	0PSI.R1	5	3	12	0	0	0	0	20	0	Diploid
2022-PLATE-3_2022-102_35-0P_Fam3_R1_05	Fam3	0 PSI	AB	AB	AB	NA	AB	AB	AB	A	AB	A	AB	AB	AB	A	AB	A	AB	AB	AB	A	NA	0PSI.R1	1	5	14	0	0	0	0	20	0	Diploid
2022-PLATE-3_2022-102_36-0P_Fam3_R1_06	Fam3	0 PSI	AB	NA	AB	AB	NA	AB	AB	AB	AB	AB	AB	A	AB	AB	AB	AB	AB	AB	AB	AB	NA	0PSI.R1	2	1	17	0	0	0	0	20	0	Diploid
2022-PLATE-3_2022-102_37-0P_Fam3_R1_07	Fam3	0 PSI	AB	NA	AB	AB	NA	ABB	NA	NA	NA	NA	AB	NA	AB	NA	AB	AB	AB	AB	A	AB	2 paternal	0PSI.R1	8	1	10	0	1	0	1	20	0.0909091	Aneuploid
2022-PLATE-3_2022-102_38-0P_Fam3_R1_08	Fam3	0 PSI	AB	AB	AB	NA	AB	A	AB	NA	NA	A	AB	A	AB	AB	AB	A	AB	AB	A	AB	NA	0PSI.R1	3	5	12	0	0	0	0	20	0	Diploid
2022-PLATE-3_2022-102_39-0P_Fam3_R1_09	Fam3	0 PSI	AB	AB	AB	NA	AB	AB	AB	AB	NA	AB	AB	AB	AB	A	AB	AB	AB	AB	A	A	NA	0PSI.R1	2	3	15	0	0	0	0	20	0	Diploid
2022-PLATE-3_2022-102_40-0P_Fam3_R1_10	Fam3	0 PSI	AB	AB	AB	AB	AB	AB	AB	A	AB	A	AB	AB	AB	AB	AB	A	AB	AB	A	A	NA	0PSI.R1	0	5	15	0	0	0	0	20	0	Diploid
2022-PLATE-3_2022-102_4-0P_Fam1_R1_04	Fam1	0 PSI	AB	AB	AB	AB	AB	AB	AB	NA	NA	A	AB	AB	AB	AB	AB	A	AB	AB	AB	AB	NA	0PSI.R1	2	2	16	0	0	0	0	20	0	Diploid
2022-PLATE-3_2022-102_41-0P_Fam3_R1_11	Fam3	0 PSI	AB	AB	AB	NA	AB	A	AB	A	AB	A	AB	AB	AB	AB	AB	AB	AB	A	A	AB	NA	0PSI.R1	1	5	14	0	0	0	0	20	0	Diploid
2022-PLATE-3_2022-102_42-0P_Fam3_R1_12	Fam3	0 PSI	AB	AB	AB	AB	AB	AB	AB	A	AB	A	AB	A	AB	A	AB	A	AB	AB	AB	A	NA	0PSI.R1	0	6	14	0	0	0	0	20	0	Diploid
2022-PLATE-3_2022-102_43-0P_Fam3_R1_13	Fam3	0 PSI	AB	AB	AB	AB	AB	A	AB	AB	AB	AB	AB	AB	A	AB	AB	AB	AB	AB	AB	A	NA	0PSI.R1	0	3	17	0	0	0	0	20	0	Diploid
2022-PLATE-3_2022-102_44-0P_Fam3_R1_14	Fam3	0 PSI	AB	AB	AB	NA	AB	NA	AB	AB	AB	A	AB	A	A	A	AB	AB	AB	A	AB	NA	NA	0PSI.R1	3	5	12	0	0	0	0	20	0	Diploid
2022-PLATE-3_2022-102_45-0P_Fam3_R1_15	Fam3	0 PSI	AB	AB	AB	NA	AB	AB	AB	AB	AB	A	AB	AB	AB	AB	AB	A	AB	AB	A	A	NA	0PSI.R1	1	4	15	0	0	0	0	20	0	Diploid
2022-PLATE-3_2022-102_46-0P_Fam1_R2_01	Fam1	0 PSI	AB	AB	A	AB	AB	AB	AB	AB	AB	AB	AB	A	AB	AB	AB	AB	AB	A	AB	A	NA	0PSI.R2	0	4	16	0	0	0	0	20	0	Diploid
2022-PLATE-3_2022-102_47-0P_Fam1_R2_02	Fam1	0 PSI	AB	AB	AB	NA	A	AB	AB	AB	AB	A	A	A	AB	A	AB	AB	AB	A	AB	AB	NA	0PSI.R2	1	6	13	0	0	0	0	20	0	Diploid
2022-PLATE-3_2022-102_48-0P_Fam1_R2_03	Fam1	0 PSI	AB	AB	AB	AB	AB	A	AB	A	A	AB	AB	AB	AB	AB	AB	AB	AB	AB	A	AB	NA	0PSI.R2	0	4	16	0	0	0	0	20	0	Diploid
2022-PLATE-3_2022-102_49-0P_Fam1_R2_04	Fam1	0 PSI	AB	AB	AB	NA	AB	AB	AB	AB	AB	AB	AB	A	A	A	AB	A	AB	AB	AB	AB	NA	0PSI.R2	1	4	15	0	0	0	0	20	0	Diploid
2022-PLATE-3_2022-102_50-0P_Fam1_R2_05	Fam1	0 PSI	AB	AB	AB	NA	A	AB	AB	NA	NA	A	NA	AB	AB	AB	AB	AB	AB	AB	A	A	bp shift	0PSI.R2	4	4	12	0	0	0	0	20	0	Diploid
2022-PLATE-3_2022-102_5-0P_Fam1_R1_05	Fam1	0 PSI	AB	AB	AB	AB	A	A	AB	AB	AB	A	AB	AB	AB	AB	AB	AB	AB	AB	A	AB	NA	0PSI.R1	0	4	16	0	0	0	0	20	0	Diploid
2022-PLATE-3_2022-102_51-0P_Fam1_R2_06	Fam1	0 PSI	AB	AB	A	AB	AB	A	AB	A	AB	A	AB	AB	AB	A	AB	AB	AB	AB	AB	A	NA	0PSI.R2	0	6	14	0	0	0	0	20	0	Diploid
2022-PLATE-3_2022-102_52-0P_Fam1_R2_07	Fam1	0 PSI	AB	AB	AB	AB	AB	A	AB	AB	AB	AB	AB	A	AB	AB	AB	AB	AB	AB	AB	A	NA	0PSI.R2	0	3	17	0	0	0	0	20	0	Diploid
2022-PLATE-3_2022-102_53-0P_Fam1_R2_08	Fam1	0 PSI	AB	AB	AB	NA	AB	AB	AB	A	AB	A	AB	AB	A	AB	AB	AB	AB	AB	A	A	NA	0PSI.R2	1	5	14	0	0	0	0	20	0	Diploid
2022-PLATE-3_2022-102_54-0P_Fam1_R2_09	Fam1	0 PSI	AB	AB	AB	NA	AB	A	AB	A	NA	AB	A	A	AB	AB	AB	AAB	AB	AB	A	AB	2 paternal	0PSI.R2	2	5	12	1	0	0	1	20	0.0769231	Aneuploid
2022-PLATE-3_2022-102_55-0P_Fam1_R2_10	Fam1	0 PSI	AB	AB	AB	NA	A	AB	AB	NA	NA	AB	AB	AB	A	A	AB	AB	AB	A	A	A	NA	0PSI.R2	3	6	11	0	0	0	0	20	0	Diploid
2022-PLATE-3_2022-102_57-0P_Fam1_R2_12	Fam1	0 PSI	AB	AB	A	NA	AB	AB	AB	NA	NA	AB	A	A	AB	AB	AB	AB	AB	AB	AB	A	NA	0PSI.R2	3	4	13	0	0	0	0	20	0	Diploid
2022-PLATE-3_2022-102_58-0P_Fam1_R2_13	Fam1	0 PSI	AB	AB	AB	NA	AB	A	AB	A	AB	AB	AB	AB	AB	AB	AB	A	AB	AB	AB	AB	NA	0PSI.R2	1	3	16	0	0	0	0	20	0	Diploid
2022-PLATE-3_2022-102_59-0P_Fam1_R2_14	Fam1	0 PSI	AB	NA	A	AB	NA	A	AB	AB	AB	AB	A	AB	AB	A	AB	AB	AB	A	A	AB	NA	0PSI.R2	2	6	12	0	0	0	0	20	0	Diploid
2022-PLATE-3_2022-102_60-0P_Fam1_R2_15	Fam1	0 PSI	AB	AB	A	AB	A	AB	AB	A	AB	AB	AB	A	AB	AB	AB	AB	AB	A	AB	AB	NA	0PSI.R2	0	5	15	0	0	0	0	20	0	Diploid
2022-PLATE-3_2022-102_6-0P_Fam1_R1_06	Fam1	0 PSI	AB	AB	A	AB	AB	AB	AB	A	AB	A	AB	AB	AB	AB	AB	AB	AB	A	A	A	NA	0PSI.R1	0	6	14	0	0	0	0	20	0	Diploid
2022-PLATE-3_2022-102_61-0P_Fam2_R2_01	Fam2	0 PSI	AB	AB	AB	NA	AB	A	AB	NA	AB	A	A	AB	A	A	AB	AB	AB	AB	AB	AB	NA	0PSI.R2	2	5	13	0	0	0	0	20	0	Diploid
2022-PLATE-3_2022-102_62-0P_Fam2_R2_02	Fam2	0 PSI	AB	AB	AB	NA	AB	AB	AB	NA	AB	AB	AB	AB	AB	A	A	AB	AB	A	A	A	NA	0PSI.R2	2	5	13	0	0	0	0	20	0	Diploid
2022-PLATE-3_2022-102_63-0P_Fam2_R2_03	Fam2	0 PSI	AB	AB	AB	A	AB	NA	AB	AB	AB	AB	AB	A	A	A	AB	AB	AB	AB	A	AB	NA	0PSI.R2	1	5	14	0	0	0	0	20	0	Diploid
2022-PLATE-3_2022-102_64-0P_Fam2_R2_04	Fam2	0 PSI	ABC	AB	A	NA	NA	NA	AB	AB	AB	A	A	AB	AB	NA	A	AB	NA	A	AB	A	bp shift	0PSI.R2	5	6	8	0	0	1	1	20	0.111111	Aneuploid
2022-PLATE-3_2022-102_65-0P_Fam2_R2_05	Fam2	0 PSI	AB	AB	AB	A	AB	AB	AB	AB	NA	AB	NA	AB	AB	AB	AB	AB	AB	AB	A	AB	NA	0PSI.R2	2	2	16	0	0	0	0	20	0	Diploid
2022-PLATE-3_2022-102_66-0P_Fam2_R2_06	Fam2	0 PSI	AB	AB	AB	A	AB	AB	AB	A	AB	AB	AB	AB	AB	A	A	AB	AB	A	AB	A	NA	0PSI.R2	0	6	14	0	0	0	0	20	0	Diploid
2022-PLATE-3_2022-102_67-0P_Fam2_R2_07	Fam2	0 PSI	AB	AB	AB	NA	AB	AB	AB	AB	A	AB	AB	AB	AB	A	AB	AB	AB	A	AB	AB	NA	0PSI.R2	1	3	16	0	0	0	0	20	0	Diploid
2022-PLATE-3_2022-102_68-0P_Fam2_R2_08	Fam2	0 PSI	AB	AB	AB	NA	AB	AB	AB	NA	NA	AB	A	AB	AB	A	A	AAB	AB	AB	A	AB	NA	0PSI.R2	3	4	12	1	0	0	1	20	0.0769231	Aneuploid
2022-PLATE-3_2022-102_69-0P_Fam2_R2_09	Fam2	0 PSI	AB	AB	A	NA	AB	A	AB	NA	NA	AB	AB	AB	AB	AB	AB	AB	AB	A	AB	AB	NA	0PSI.R2	3	3	14	0	0	0	0	20	0	Diploid
2022-PLATE-3_2022-102_70-0P_Fam2_R2_10	Fam2	0 PSI	AB	AB	AB	NA	AB	AB	AB	AB	AB	AB	AB	AB	AB	A	A	AB	AB	A	AB	AB	NA	0PSI.R2	1	3	16	0	0	0	0	20	0	Diploid
2022-PLATE-3_2022-102_7-0P_Fam1_R1_07	Fam1	0 PSI	AB	AB	A	AB	A	A	AB	AB	AB	AB	A	A	AB	AB	AB	AB	AB	A	A	A	NA	0PSI.R1	0	8	12	0	0	0	0	20	0	Diploid
2022-PLATE-3_2022-102_71-0P_Fam2_R2_11	Fam2	0 PSI	AB	AB	A	NA	AB	AB	AB	A	AB	A	A	A	AB	AB	A	AB	AB	A	A	AB	NA	0PSI.R2	1	8	11	0	0	0	0	20	0	Diploid
2022-PLATE-3_2022-102_72-0P_Fam2_R2_12	Fam2	0 PSI	AB	AB	NA	NA	NA	NA	AB	AB	A	A	AB	NA	AB	NA	A	ABB	AB	AB	A	AB	2 paternal	0PSI.R2	6	4	9	0	1	0	1	20	0.1	Aneuploid
2022-PLATE-3_2022-102_73-0P_Fam2_R2_13	Fam2	0 PSI	AB	AB	AB	NA	AB	A	AB	A	AB	AB	AB	AB	AB	AB	A	AB	AB	A	AB	AB	NA	0PSI.R2	1	4	15	0	0	0	0	20	0	Diploid
2022-PLATE-3_2022-102_74-0P_Fam2_R2_14	Fam2	0 PSI	AB	AB	AB	NA	AB	NA	AB	AB	NA	AB	AB	AB	AB	AB	AB	AB	AB	A	AB	AB	NA	0PSI.R2	3	1	16	0	0	0	0	20	0	Diploid
2022-PLATE-3_2022-102_75-0P_Fam2_R2_15	Fam2	0 PSI	AB	AB	A	A	AB	NA	ABB	NA	NA	AB	A	AB	AB	A	AB	NA	AB	AB	AB	AB	2 paternal	0PSI.R2	4	4	11	0	1	0	1	20	0.0833333	Aneuploid
2022-PLATE-3_2022-102_76-0P_Fam3_R2_01	Fam3	0 PSI	AB	NA	AB	NA	NA	A	AB	AB	AB	AB	AB	NA	AB	NA	AB	ABB	AB	NA	A	A	2 paternal	0PSI.R2	6	3	10	0	1	0	1	20	0.0909091	Aneuploid
2022-PLATE-3_2022-102_77-0P_Fam3_R2_02	Fam3	0 PSI	AB	AB	AB	AB	NA	NA	NA	NA	NA	A	ABB	AB	AB	NA	NA	AB	NA	AB	A	NA	NA	0PSI.R2	9	2	8	0	1	0	1	20	0.111111	Aneuploid
2022-PLATE-3_2022-102_78-0P_Fam3_R2_03	Fam3	0 PSI	AB	AB	AB	NA	AB	AB	AB	NA	NA	AB	AB	A	AB	A	AB	AB	AB	A	A	AB	NA	0PSI.R2	3	4	13	0	0	0	0	20	0	Diploid
2022-PLATE-3_2022-102_79-0P_Fam3_R2_04	Fam3	0 PSI	AB	AB	AB	NA	AB	AB	AB	NA	NA	AB	AB	A	AB	A	AB	A	AB	AB	A	AB	NA	0PSI.R2	3	4	13	0	0	0	0	20	0	Diploid
2022-PLATE-3_2022-102_80-0P_Fam3_R2_05	Fam3	0 PSI	AB	AB	AB	AB	AB	A	AB	AB	AB	A	AB	AB	A	AB	AB	A	AB	AB	A	AB	NA	0PSI.R2	0	5	15	0	0	0	0	20	0	Diploid
2022-PLATE-3_2022-102_8-0P_Fam1_R1_08	Fam1	0 PSI	AB	AB	A	AB	AB	A	AB	AB	AB	AB	AB	A	AB	A	AB	AB	AB	AB	AB	A	NA	0PSI.R1	0	5	15	0	0	0	0	20	0	Diploid
2022-PLATE-3_2022-102_81-0P_Fam3_R2_06	Fam3	0 PSI	AB	AB	AB	AB	AB	AB	AB	AB	AB	AB	AB	AB	AB	A	AB	AB	AB	AB	AB	A	NA	0PSI.R2	0	2	18	0	0	0	0	20	0	Diploid
2022-PLATE-3_2022-102_82-0P_Fam3_R2_07	Fam3	0 PSI	AB	AB	AB	NA	NA	NA	AB	NA	NA	A	AB	AB	AB	A	AB	AAB	NA	AB	A	AB	NA	0PSI.R2	6	3	10	1	0	0	1	20	0.0909091	Aneuploid
2022-PLATE-3_2022-102_83-0P_Fam3_R2_08	Fam3	0 PSI	AB	AB	AB	AB	AB	AB	AB	A	AB	AB	AB	AB	AB	A	AB	A	AB	AB	A	AB	NA	0PSI.R2	0	4	16	0	0	0	0	20	0	Diploid
2022-PLATE-3_2022-102_84-0P_Fam3_R2_09	Fam3	0 PSI	AB	AB	AB	NA	AB	NA	AB	NA	NA	AB	AB	AB	A	A	AB	AAB	NA	A	AB	NA	NA	0PSI.R2	6	3	10	1	0	0	1	20	0.0909091	Aneuploid
2022-PLATE-3_2022-102_85-0P_Fam3_R2_10	Fam3	0 PSI	AB	AB	AB	AB	AB	A	NA	NA	NA	A	AB	AB	AB	A	AB	AB	AB	NA	AB	AB	NA	0PSI.R2	4	3	13	0	0	0	0	20	0	Diploid
2022-PLATE-3_2022-102_86-0P_Fam3_R2_11	Fam3	0 PSI	AB	AB	AB	NA	AB	A	AB	NA	NA	A	AB	AB	AB	AB	AB	AB	AB	A	AB	A	NA	0PSI.R2	3	4	13	0	0	0	0	20	0	Diploid
2022-PLATE-3_2022-102_88-0P_Fam3_R2_13	Fam3	0 PSI	AB	AB	AB	NA	AB	NA	AB	A	AB	AB	AB	AB	A	AB	AB	A	NA	AB	AB	AB	NA	0PSI.R2	3	3	14	0	0	0	0	20	0	Diploid
2022-PLATE-3_2022-102_89-0P_Fam3_R2_14	Fam3	0 PSI	AB	AB	AB	NA	AB	AB	AB	A	AB	A	AB	AB	AB	AB	AB	A	AB	AB	A	AB	NA	0PSI.R2	1	4	15	0	0	0	0	20	0	Diploid
2022-PLATE-3_2022-102_9-0P_Fam1_R1_09	Fam1	0 PSI	AB	AB	A	AB	A	A	AB	NA	NA	AB	AB	AB	AB	A	AB	A	AB	AB	A	A	NA	0PSI.R1	2	7	11	0	0	0	0	20	0	Diploid
2022-PLATE-3_2022-102_91-P1_Fam1_R1_01	Fam1	6500 PSI	AB	AB	A	NA	AB	A	AB	NA	NA	AB	NA	AB	AB	AB	AB	AAB	NA	AB	A	NA	NA	6500PSI.R1	6	3	10	1	0	0	1	20	0.0909091	Aneuploid
2022-PLATE-3_2022-102_92-P1_Fam1_R1_02	Fam1	6500 PSI	AB	AB	A	NA	A	AB	AB	AB	AB	A	A	A	AB	AB	AB	A	NA	AB	A	AB	NA	6500PSI.R1	2	7	11	0	0	0	0	20	0	Diploid
2022-PLATE-3_2022-102_93-P1_Fam1_R1_03	Fam1	6500 PSI	AB	AB	A	NA	AB	AB	AB	A	AB	A	AB	A	AB	A	AB	A	AB	AB	AB	AB	NA	6500PSI.R1	1	6	13	0	0	0	0	20	0	Diploid
2022-PLATE-3_2022-102_94-P1_Fam1_R1_04	Fam1	6500 PSI	AB	AB	AB	NA	AB	NA	AB	AB	AB	AB	AAB	AB	AB	A	AB	NA	NA	A	A	AB	2 paternal	6500PSI.R1	4	3	12	1	0	0	1	20	0.0769231	Aneuploid
2022-PLATE-9_2022-102_100-P1_Fam1_R1_10	Fam1	6500 PSI	AB	AB	AB	NA	AB	AB	AB	A	AB	AB	A	A	AB	A	AB	A	AB	AB	A	AB	NA	6500PSI.R1	1	6	13	0	0	0	0	20	0	Diploid
2022-PLATE-9_2022-102_101-P1_Fam1_R1_11	Fam1	6500 PSI	AB	AB	A	NA	A	A	AB	AB	AB	AB	A	A	AB	AB	AB	AB	AB	A	A	A	NA	6500PSI.R1	1	8	11	0	0	0	0	20	0	Diploid
2022-PLATE-9_2022-102_102-P1_Fam1_R1_12	Fam1	6500 PSI	NA	NA	NA	AB	AB	AB	AB	A	AB	AB	AB	AB	A	AB	AB	AB	AB	AB	AB	A	NA	6500PSI.R1	3	3	14	0	0	0	0	20	0	Diploid
2022-PLATE-9_2022-102_103-P1_Fam1_R1_13	Fam1	6500 PSI	AB	AB	AB	AB	AB	AB	AB	A	AB	AB	AB	A	A	AB	AB	AB	AB	A	AB	A	NA	6500PSI.R1	0	5	15	0	0	0	0	20	0	Diploid
2022-PLATE-9_2022-102_104-P1_Fam1_R1_14	Fam1	6500 PSI	AB	AB	AB	NA	AB	A	AB	A	AB	AB	AB	AB	AB	AB	AB	AB	AB	AB	AB	AB	NA	6500PSI.R1	1	2	17	0	0	0	0	20	0	Diploid
2022-PLATE-9_2022-102_105-P1_Fam1_R1_15	Fam1	6500 PSI	AB	AB	A	AB	A	A	AB	AB	AB	AB	AB	A	AB	AB	AB	AB	AB	AB	AB	AB	NA	6500PSI.R1	0	4	16	0	0	0	0	20	0	Diploid
2022-PLATE-9_2022-102_106-P1_Fam2_R1_01	Fam2	6500 PSI	AB	AB	A	A	AB	AB	AB	AB	AB	AB	AB	AB	AB	A	AB	AB	AB	AB	AB	AB	NA	6500PSI.R1	0	3	17	0	0	0	0	20	0	Diploid
2022-PLATE-9_2022-102_107-P1_Fam2_R1_02	Fam2	6500 PSI	AB	AB	A	NA	AB	A	AB	AB	A	AB	AB	AB	A	A	A	AB	AB	AB	AB	AB	NA	6500PSI.R1	1	6	13	0	0	0	0	20	0	Diploid
2022-PLATE-9_2022-102_108-P1_Fam2_R1_03	Fam2	6500 PSI	AB	AB	AB	NA	AB	AB	AB	AB	AB	AB	A	AB	AB	A	A	AB	AB	A	A	A	NA	6500PSI.R1	1	6	13	0	0	0	0	20	0	Diploid
2022-PLATE-9_2022-102_109-P1_Fam2_R1_04	Fam2	6500 PSI	AB	AB	AB	NA	AB	A	AB	A	A	AB	AB	AB	AB	AB	AB	AB	AB	AB	A	AB	NA	6500PSI.R1	1	4	15	0	0	0	0	20	0	Diploid
2022-PLATE-9_2022-102_110-P1_Fam2_R1_05	Fam2	6500 PSI	AB	AB	AB	A	NA	A	NA	NA	NA	A	AB	AB	A	AB	A	AB	AB	A	AB	AB	NA	6500PSI.R1	4	6	10	0	0	0	0	20	0	Diploid
2022-PLATE-9_2022-102_111-P1_Fam2_R1_06	Fam2	6500 PSI	AB	AB	A	NA	AB	A	AB	AB	AB	AB	AB	A	AB	AB	A	AB	AB	AB	A	A	NA	6500PSI.R1	1	6	13	0	0	0	0	20	0	Diploid
2022-PLATE-9_2022-102_112-P1_Fam2_R1_07	Fam2	6500 PSI	AB	AB	A	NA	AB	AB	AB	AB	A	AB	AB	AB	AB	AB	AB	AB	AB	AB	AB	A	NA	6500PSI.R1	1	3	16	0	0	0	0	20	0	Diploid
2022-PLATE-9_2022-102_113-P1_Fam2_R1_08	Fam2	6500 PSI	AB	AB	AB	NA	AB	AB	AB	AB	AB	A	A	A	AB	A	A	AB	AB	A	A	AB	NA	6500PSI.R1	1	7	12	0	0	0	0	20	0	Diploid
2022-PLATE-9_2022-102_114-P1_Fam2_R1_09	Fam2	6500 PSI	AB	AB	AB	A	AB	AB	AB	AB	AB	A	A	A	AB	A	A	AAB	AB	ABB	AB	AB	NA	6500PSI.R1	0	6	12	1	1	0	2	20	0.142857	Aneuploid
2022-PLATE-9_2022-102_115-P1_Fam2_R1_10	Fam2	6500 PSI	AB	AB	AB	NA	AB	AB	AB	A	AB	AB	AB	A	AB	AB	A	AB	AB	A	AB	AB	NA	6500PSI.R1	1	4	15	0	0	0	0	20	0	Diploid
2022-PLATE-9_2022-102_116-P1_Fam2_R1_11	Fam2	6500 PSI	AB	AB	AB	NA	AB	AB	AB	A	A	AB	AB	AB	AB	A	AB	AB	AB	A	AB	AB	NA	6500PSI.R1	1	4	15	0	0	0	0	20	0	Diploid
2022-PLATE-9_2022-102_117-P1_Fam2_R1_12	Fam2	6500 PSI	AAB	AB	A	A	AB	AB	AB	AB	ABB	AAB	ABB	AB	AB	A	A	AB	AB	AB	ABB	AB	NA	6500PSI.R1	0	4	11	2	3	0	5	20	0.3125	Aneuploid
2022-PLATE-9_2022-102_118-P1_Fam2_R1_13	Fam2	6500 PSI	AB	AB	AB	A	NA	AB	AB	A	A	AB	AB	NA	AB	A	A	AB	AB	AB	AB	AB	NA	6500PSI.R1	2	5	13	0	0	0	0	20	0	Diploid
2022-PLATE-9_2022-102_119-P1_Fam2_R1_14	Fam2	6500 PSI	AB	NA	AB	A	NA	AB	AB	AB	AB	AB	A	A	AB	A	A	AB	AB	AB	AB	AB	NA	6500PSI.R1	2	5	13	0	0	0	0	20	0	Diploid
2022-PLATE-9_2022-102_120-P1_Fam2_R1_15	Fam2	6500 PSI	AB	AB	AB	NA	AB	A	AB	AB	AB	AB	AB	A	AB	AB	A	AB	AB	AB	A	AB	NA	6500PSI.R1	1	4	15	0	0	0	0	20	0	Diploid
2022-PLATE-9_2022-102_121-P1_Fam3_R1_01	Fam3	6500 PSI	AB	AB	AB	AB	AB	AB	AB	AB	AB	A	AB	AB	AB	A	AB	A	AB	AB	AB	A	NA	6500PSI.R1	0	4	16	0	0	0	0	20	0	Diploid
2022-PLATE-9_2022-102_122-P1_Fam3_R1_02	Fam3	6500 PSI	AAB	ABC	ABC	ABB	ABC	A	ABC	A	ABC	A	ABC	AAB	AAB	A	AAB	AAB	ABC	ABB	AAB	A	NA	6500PSI.R1	0	5	0	6	2	7	15	20	1	Triploid
2022-PLATE-9_2022-102_123-P1_Fam3_R1_03	Fam3	6500 PSI	AB	AB	AB	AB	AB	AB	AB	AB	AB	AB	AB	AB	AB	AB	AB	AB	AB	AB	AB	AB	NA	6500PSI.R1	0	0	20	0	0	0	0	20	0	Diploid
2022-PLATE-9_2022-102_124-P1_Fam3_R1_04	Fam3	6500 PSI	AB	ABC	AB	ABB	AB	A	AB	A	AAB	AAB	ABC	A	A	AB	AB	A	AB	AB	AAB	AAB	NA	6500PSI.R1	0	5	8	4	1	2	7	20	0.466667	Aneuploid
2022-PLATE-9_2022-102_125-P1_Fam3_R1_05	Fam3	6500 PSI	AB	AB	AB	AB	AB	A	AB	AB	AB	AB	AB	AB	AB	AB	AB	AB	AB	A	AB	A	NA	6500PSI.R1	0	3	17	0	0	0	0	20	0	Diploid
2022-PLATE-9_2022-102_126-P1_Fam3_R1_06	Fam3	6500 PSI	AB	AB	AB	AB	AB	A	AB	A	A	A	A	AB	AB	A	AB	A	AB	AB	A	AB	Missing maternal 1-3 loci	6500PSI.R1	0	8	12	0	0	0	0	20	0	Diploid
2022-PLATE-9_2022-102_127-P1_Fam3_R1_07	Fam3	6500 PSI	AB	AB	AB	NA	AB	AB	AB	NA	NA	NA	ABC	AB	AB	AB	AB	AB	AB	AB	A	AB	NA	6500PSI.R1	4	1	14	0	0	1	1	20	0.0666667	Aneuploid
2022-PLATE-9_2022-102_128-P1_Fam3_R1_08	Fam3	6500 PSI	AB	AB	AB	AB	AB	A	AB	A	AB	AB	AB	A	A	AB	AB	AB	AB	A	A	AB	NA	6500PSI.R1	0	6	14	0	0	0	0	20	0	Diploid
2022-PLATE-9_2022-102_129-P1_Fam3_R1_09	Fam3	6500 PSI	AB	AB	AB	AB	AB	A	AB	A	AB	A	AB	AB	AB	AB	AB	A	AB	AB	AB	A	NA	6500PSI.R1	0	5	15	0	0	0	0	20	0	Diploid
2022-PLATE-9_2022-102_130-P1_Fam3_R1_10	Fam3	6500 PSI	AB	AB	AB	AB	AB	AB	ABC	A	AB	AB	AB	A	AB	A	AB	A	AB	AB	A	A	NA	6500PSI.R1	0	6	13	0	0	1	1	20	0.0714286	Aneuploid
2022-PLATE-9_2022-102_131-P1_Fam3_R1_11	Fam3	6500 PSI	ABB	ABC	ABC	ABB	ABC	NA	ABC	ABB	ABC	AAB	ABC	ABC	AB	AAB	AAB	A	ABC	ABC	ABB	AAB	NA	6500PSI.R1	1	1	1	4	4	9	17	20	0.944444	Aneuploid
2022-PLATE-9_2022-102_132-P1_Fam3_R1_12	Fam3	6500 PSI	AB	ABC	ABC	AB	ABC	A	AAB	AB	ABC	AAB	ABC	AB	A	A	AAB	AAB	ABC	ABB	A	AAB	NA	6500PSI.R1	0	4	4	5	1	6	12	20	0.75	Aneuploid
2022-PLATE-9_2022-102_133-P1_Fam3_R1_13	Fam3	6500 PSI	AB	ABB	AB	ABB	ABC	A	AB	A	AB	AB	AB	A	A	A	AB	AAB	ABC	ABB	A	A	NA	6500PSI.R1	0	7	7	1	3	2	6	20	0.461538	Aneuploid
2022-PLATE-9_2022-102_134-P1_Fam3_R1_14	Fam3	6500 PSI	AB	AB	AB	AB	AB	AB	AB	AB	AB	A	AB	AB	AB	A	AB	A	AB	AB	A	A	NA	6500PSI.R1	0	5	15	0	0	0	0	20	0	Diploid
2022-PLATE-9_2022-102_135-P1_Fam3_R1_15	Fam3	6500 PSI	AB	ABC	ABC	NA	ABC	A	ABB	ABB	ABC	AAB	ABC	ABC	AAB	AAB	AAB	A	ABC	ABC	ABB	AAB	NA	6500PSI.R1	1	2	1	5	3	8	16	20	0.941176	Aneuploid
2022-PLATE-9_2022-102_136-P1_Fam1_R2_01	Fam1	6500 PSI	AB	AB	AB	AB	A	AB	AB	AB	AB	AB	A	A	AB	A	AB	AB	AB	AB	A	AB	NA	6500PSI.R2	0	5	15	0	0	0	0	20	0	Diploid
2022-PLATE-9_2022-102_137-P1_Fam1_R2_02	Fam1	6500 PSI	AB	AB	A	AB	AB	A	AB	AB	AB	AB	AB	A	AB	AB	AB	AB	AB	A	AB	AB	NA	6500PSI.R2	0	4	16	0	0	0	0	20	0	Diploid
2022-PLATE-9_2022-102_138-P1_Fam1_R2_03	Fam1	6500 PSI	AB	AB	AB	AB	AB	A	AB	AB	AB	A	AB	A	AB	A	AB	AB	AB	AB	A	AB	bp shift	6500PSI.R2	0	5	15	0	0	0	0	20	0	Diploid
2022-PLATE-9_2022-102_139-P1_Fam1_R2_04	Fam1	6500 PSI	AB	AB	AB	AB	AB	A	AB	AB	AB	A	AB	A	AB	AB	AB	A	AB	AB	AB	AB	NA	6500PSI.R2	0	4	16	0	0	0	0	20	0	Diploid
2022-PLATE-9_2022-102_140-P1_Fam1_R2_05	Fam1	6500 PSI	AB	AB	A	AB	AB	AB	AB	AB	AB	AB	A	A	A	A	AB	A	AB	A	A	A	NA	6500PSI.R2	0	9	11	0	0	0	0	20	0	Diploid
2022-PLATE-9_2022-102_141-P1_Fam1_R2_06	Fam1	6500 PSI	AB	NA	AB	AB	A	AB	AB	A	A	NA	AB	A	AB	A	AB	AB	AB	AB	AB	A	NA	6500PSI.R2	2	6	12	0	0	0	0	20	0	Diploid
2022-PLATE-9_2022-102_142-P1_Fam1_R2_07	Fam1	6500 PSI	AB	AB	AB	AB	AB	AB	AB	AB	A	AB	AB	A	A	AB	AB	A	AB	AB	A	A	NA	6500PSI.R2	0	6	14	0	0	0	0	20	0	Diploid
2022-PLATE-9_2022-102_143-P1_Fam1_R2_08	Fam1	6500 PSI	AB	AB	AB	NA	A	A	AB	A	AB	AB	A	A	AB	A	AB	AB	AB	A	A	AB	NA	6500PSI.R2	1	8	11	0	0	0	0	20	0	Diploid
2022-PLATE-9_2022-102_144-P1_Fam1_R2_09	Fam1	6500 PSI	AB	AB	AB	NA	AB	AB	AB	A	AB	AB	AB	A	AB	AB	AB	A	AB	AB	AB	A	NA	6500PSI.R2	1	4	15	0	0	0	0	20	0	Diploid
2022-PLATE-9_2022-102_145-P1_Fam1_R2_10	Fam1	6500 PSI	ABB	AB	A	AB	NA	AB	AB	A	NA	A	AB	A	AB	NA	ABB	AB	AB	AB	AB	AAB	2 paternal	6500PSI.R2	3	4	10	1	2	0	3	20	0.230769	Aneuploid
2022-PLATE-9_2022-102_146-P1_Fam1_R2_11	Fam1	6500 PSI	AB	AB	A	AB	AB	AB	AB	AB	AB	AB	AB	AB	A	AB	AB	AB	AB	A	AB	A	NA	6500PSI.R2	0	4	16	0	0	0	0	20	0	Diploid
2022-PLATE-9_2022-102_147-P1_Fam1_R2_12	Fam1	6500 PSI	AB	ABC	AB	AB	AB	AB	AB	ABB	A	AB	AB	AB	AB	AB	AB	AB	AB	AB	AB	A	NA	6500PSI.R2	0	2	16	0	1	1	2	20	0.111111	Aneuploid
2022-PLATE-9_2022-102_148-P1_Fam1_R2_13	Fam1	6500 PSI	AB	AB	A	AB	AB	AB	AB	A	AB	AB	AB	A	A	AB	AB	AB	AB	AB	AB	AB	NA	6500PSI.R2	0	4	16	0	0	0	0	20	0	Diploid
2022-PLATE-9_2022-102_149-P1_Fam1_R2_14	Fam1	6500 PSI	AB	AB	AB	AB	AB	A	AB	AB	A	AB	AB	A	AB	AB	AB	A	AB	AB	A	A	NA	6500PSI.R2	0	6	14	0	0	0	0	20	0	Diploid
2022-PLATE-9_2022-102_150-P1_Fam1_R2_15	Fam1	6500 PSI	AB	AB	A	AB	AB	AB	AB	A	A	AB	AB	A	A	AB	AB	AB	AB	AB	AB	AB	NA	6500PSI.R2	0	5	15	0	0	0	0	20	0	Diploid
2022-PLATE-9_2022-102_151-P1_Fam2_R2_01	Fam2	6500 PSI	AB	ABC	AB	NA	AB	A	ABC	AAB	AAB	AAB	ABB	AB	A	A	A	AB	AB	A	ABB	AB	NA	6500PSI.R2	1	5	7	3	2	2	7	20	0.5	Aneuploid
2022-PLATE-9_2022-102_152-P1_Fam2_R2_02	Fam2	6500 PSI	AB	AB	AB	NA	AB	A	AB	AB	AB	AB	A	AB	AB	AB	AB	AB	AB	A	A	A	NA	6500PSI.R2	1	5	14	0	0	0	0	20	0	Diploid
2022-PLATE-9_2022-102_153-P1_Fam2_R2_03	Fam2	6500 PSI	AB	AB	AB	A	AB	A	AB	AB	AB	AB	AB	AB	AB	AB	AB	AB	AB	AB	AB	AB	NA	6500PSI.R2	0	2	18	0	0	0	0	20	0	Diploid
2022-PLATE-9_2022-102_154-P1_Fam2_R2_04	Fam2	6500 PSI	AB	AB	ABC	NA	AB	A	AB	AB	AB	A	A	A	AB	A	AB	AB	AB	AB	A	AB	NA	6500PSI.R2	1	6	12	0	0	1	1	20	0.0769231	Aneuploid
2022-PLATE-9_2022-102_155-P1_Fam2_R2_05	Fam2	6500 PSI	AB	AB	AB	NA	AB	A	AB	AB	A	AB	AB	A	A	AB	A	AB	AB	AB	AB	AB	NA	6500PSI.R2	1	5	14	0	0	0	0	20	0	Diploid
2022-PLATE-9_2022-102_156-P1_Fam2_R2_06	Fam2	6500 PSI	AB	AB	AB	NA	AB	AB	AB	A	A	AB	AB	ABB	AB	A	A	AAB	AB	ABB	A	AB	NA	6500PSI.R2	1	5	11	1	2	0	3	20	0.214286	Aneuploid
2022-PLATE-9_2022-102_157-P1_Fam2_R2_07	Fam2	6500 PSI	AB	AB	AB	NA	AB	AB	AB	A	AB	AB	AB	A	AB	A	A	AB	AB	A	A	A	NA	6500PSI.R2	1	7	12	0	0	0	0	20	0	Diploid
2022-PLATE-9_2022-102_158-P1_Fam2_R2_08	Fam2	6500 PSI	AB	AAB	AB	A	AB	A	AB	A	AB	AB	AB	AB	A	A	A	AB	AB	AB	A	AB	NA	6500PSI.R2	0	7	12	1	0	0	1	20	0.0769231	Aneuploid
2022-PLATE-9_2022-102_159-P1_Fam2_R2_09	Fam2	6500 PSI	AB	AB	AB	NA	AB	A	AB	AB	ABB	ABC	ABB	AB	AB	A	AB	AB	AB	A	AAB	AB	NA	6500PSI.R2	1	3	12	1	2	1	4	20	0.25	Aneuploid
2022-PLATE-9_2022-102_160-P1_Fam2_R2_10	Fam2	6500 PSI	AB	AB	AB	NA	AB	AB	AB	AB	AB	A	AB	AB	AB	AB	AB	AB	AB	A	A	A	NA	6500PSI.R2	1	4	15	0	0	0	0	20	0	Diploid
2022-PLATE-9_2022-102_161-P1_Fam2_R2_11	Fam2	6500 PSI	AB	AB	A	NA	AB	AB	AB	AAB	AB	A	A	AB	AB	AB	AB	AB	AB	AB	A	AB	NA	6500PSI.R2	1	4	14	1	0	0	1	20	0.0666667	Aneuploid
2022-PLATE-9_2022-102_162-P1_Fam2_R2_12	Fam2	6500 PSI	AB	AB	AB	NA	AB	AB	ABC	AB	A	A	AB	AB	AB	AB	AAB	AB	AB	A	A	AB	NA	6500PSI.R2	1	4	13	1	0	1	2	20	0.133333	Aneuploid
2022-PLATE-9_2022-102_163-P1_Fam2_R2_13	Fam2	6500 PSI	AB	AB	A	A	AB	A	AB	A	A	A	A	AB	A	A	ABB	AB	AB	AB	A	AB	Missing maternal 1-3 loci	6500PSI.R2	0	10	9	0	1	0	1	20	0.1	Aneuploid
2022-PLATE-9_2022-102_164-P1_Fam2_R2_14	Fam2	6500 PSI	AB	NA	AB	A	NA	AB	AB	AB	AAB	AAB	ABB	AB	AB	A	AB	ABB	AB	A	AAB	AB	2 paternal	6500PSI.R2	2	3	10	3	2	0	5	20	0.333333	Aneuploid
2022-PLATE-9_2022-102_165-P1_Fam2_R2_15	Fam2	6500 PSI	AB	AB	NA	A	NA	AB	ABB	ABB	AB	AB	AB	NA	AB	AB	A	AB	AB	A	AB	AB	2 paternal	6500PSI.R2	3	3	12	0	2	0	2	20	0.142857	Aneuploid
2022-PLATE-9_2022-102_166-P1_Fam3_R2_01	Fam3	6500 PSI	AAB	ABC	ABC	ABB	NA	A	AB	A	ABC	AAB	ABC	ABC	AAB	AAB	AAB	A	ABC	ABC	AAB	A	NA	6500PSI.R2	1	4	1	6	1	7	14	20	0.933333	Aneuploid
2022-PLATE-9_2022-102_167-P1_Fam3_R2_02	Fam3	6500 PSI	AB	AB	NA	AB	NA	A	AB	NA	AAB	AAB	ABC	AB	AB	AB	AB	A	AB	AB	AAB	AB	NA	6500PSI.R2	3	2	11	3	0	1	4	20	0.266667	Aneuploid
2022-PLATE-9_2022-102_169-P1_Fam3_R2_04	Fam3	6500 PSI	AAB	AB	AB	AB	AB	A	AB	AB	AB	A	AB	AB	A	AB	AB	A	AB	AB	AB	AB	NA	6500PSI.R2	0	4	15	1	0	0	1	20	0.0625	Aneuploid
2022-PLATE-9_2022-102_170-P1_Fam3_R2_05	Fam3	6500 PSI	AB	ABC	AB	AB	ABC	A	AB	A	AB	AB	AB	A	A	AB	AB	A	ABC	AB	AB	AB	NA	6500PSI.R2	0	5	12	0	0	3	3	20	0.2	Aneuploid
2022-PLATE-9_2022-102_171-P1_Fam3_R2_06	Fam3	6500 PSI	AAB	ABB	ABC	ABB	ABC	A	ABB	ABB	AAB	AAB	ABC	AAB	AAB	AAB	AAB	A	ABC	ABC	AAB	AAB	NA	6500PSI.R2	0	2	0	9	4	5	18	20	1	Triploid
2022-PLATE-9_2022-102_172-P1_Fam3_R2_07	Fam3	6500 PSI	AB	AB	AB	AB	AB	AB	AB	AB	AB	A	AB	AB	AB	AB	AB	A	AB	AB	AB	A	NA	6500PSI.R2	0	3	17	0	0	0	0	20	0	Diploid
2022-PLATE-9_2022-102_173-P1_Fam3_R2_08	Fam3	6500 PSI	ABB	ABC	AB	AB	AB	AB	AB	A	AB	AB	AB	A	AB	AB	AB	AB	AB	AB	AB	A	NA	6500PSI.R2	0	3	15	0	1	1	2	20	0.117647	Aneuploid
2022-PLATE-9_2022-102_174-P1_Fam3_R2_09	Fam3	6500 PSI	ABB	ABC	ABC	NA	ABC	A	ABC	ABB	ABC	A	ABC	ABC	AAB	A	AAB	A	ABC	ABC	AAB	A	NA	6500PSI.R2	1	5	0	3	2	9	14	20	1	Triploid
2022-PLATE-9_2022-102_175-P1_Fam3_R2_10	Fam3	6500 PSI	ABB	ABC	AAB	ABB	ABC	A	ABC	A	ABC	A	ABC	ABC	ABB	AAB	AAB	A	ABC	ABC	AAB	AAB	NA	6500PSI.R2	0	4	0	5	3	8	16	20	1	Triploid
2022-PLATE-9_2022-102_176-P1_Fam3_R2_11	Fam3	6500 PSI	AB	AB	AB	AB	AB	A	AB	A	AB	A	AB	AB	A	AB	AB	AB	AB	A	A	AB	NA	6500PSI.R2	0	6	14	0	0	0	0	20	0	Diploid
2022-PLATE-9_2022-102_177-P1_Fam3_R2_12	Fam3	6500 PSI	AB	ABC	AB	NA	AB	AB	ABC	A	ABC	A	ABC	AB	AB	A	AB	A	AB	AB	ABB	A	NA	6500PSI.R2	1	5	9	0	1	4	5	20	0.357143	Aneuploid
2022-PLATE-9_2022-102_178-P1_Fam3_R2_13	Fam3	6500 PSI	AB	AB	AB	AB	AB	A	AB	AB	AB	A	AB	AB	A	AB	AAB	AB	AB	AB	A	A	NA	6500PSI.R2	0	5	14	1	0	0	1	20	0.0666667	Aneuploid
2022-PLATE-9_2022-102_179-P1_Fam3_R2_14	Fam3	6500 PSI	ABB	ABC	ABC	NA	ABC	A	ABC	ABB	ABC	A	ABC	ABC	AAB	AAB	AAB	AAB	ABC	ABB	ABB	AAB	NA	6500PSI.R2	1	2	0	5	4	8	17	20	1	Triploid
2022-PLATE-9_2022-102_180-P1_Fam3_R2_15	Fam3	6500 PSI	AB	AB	AB	ABB	AB	A	AB	A	AB	A	AB	A	A	A	AB	AB	AB	AB	AB	A	NA	6500PSI.R2	0	7	12	0	1	0	1	20	0.0769231	Aneuploid
2022-PLATE-9_2022-102_181-P2_Fam1_R1_01	Fam1	7500 PSI	ABC	AB	AB	NA	AB	AB	AB	A	ABB	ABC	ABB	A	AB	AB	AB	ABB	AB	ABB	AAB	AB	NA	7500PSI.R1	1	2	10	1	4	2	7	20	0.411765	Aneuploid
2022-PLATE-9_2022-102_182-P2_Fam1_R1_02	Fam1	7500 PSI	ABC	ABC	ABB	NA	ABC	AB	ABB	ABB	ABC	AAB	ABC	A	A	A	ABC	AB	NA	AB	A	A	NA	7500PSI.R1	2	5	3	1	3	6	10	20	0.769231	Aneuploid
2022-PLATE-9_2022-102_183-P2_Fam1_R1_03	Fam1	7500 PSI	AAB	ABC	A	ABC	ABB	A	AAB	ABB	ABC	ABC	ABC	A	AAB	A	ABC	ABB	ABB	ABB	NA	A	NA	7500PSI.R1	1	5	0	3	5	6	14	20	1	Triploid
2022-PLATE-9_2022-102_184-P2_Fam1_R1_04	Fam1	7500 PSI	ABB	ABC	A	ABC	ABB	A	AB	A	ABB	ABC	ABB	A	ABC	AAB	ABC	ABB	ABB	AAB	AAB	AAB	NA	7500PSI.R1	0	4	1	4	6	5	15	20	0.9375	Aneuploid
2022-PLATE-9_2022-102_185-P2_Fam1_R1_05	Fam1	7500 PSI	AB	AB	A	NA	AB	A	ABB	A	AB	A	A	A	AB	AB	AB	AB	NA	AB	A	AB	NA	7500PSI.R1	2	7	10	0	1	0	1	20	0.0909091	Aneuploid
2022-PLATE-9_2022-102_186-P2_Fam1_R1_06	Fam1	7500 PSI	AB	AB	A	A	AB	A	AB	A	AB	AB	AB	A	AB	A	AB	A	NA	AB	A	AB	Missing maternal 1-3 loci	7500PSI.R1	1	8	11	0	0	0	0	20	0	Diploid
2022-PLATE-9_2022-102_187-P2_Fam1_R1_07	Fam1	7500 PSI	AB	AB	AB	AB	ABC	A	AAB	AB	A	AB	AB	AAB	AB	AB	AB	A	NA	A	AB	A	NA	7500PSI.R1	1	5	11	2	0	1	3	20	0.214286	Aneuploid
2022-PLATE-9_2022-102_188-P2_Fam1_R1_08	Fam1	7500 PSI	AB	AB	AB	AB	A	AB	AB	AB	AB	AB	A	AB	AB	AAB	AB	AB	NA	AB	A	A	NA	7500PSI.R1	1	4	14	1	0	0	1	20	0.0666667	Aneuploid
2022-PLATE-9_2022-102_95-P1_Fam1_R1_05	Fam1	6500 PSI	AB	AB	A	AB	AB	AB	AB	AB	A	AB	AB	A	A	AB	AB	AB	AB	A	AB	A	NA	6500PSI.R1	0	6	14	0	0	0	0	20	0	Diploid
2022-PLATE-9_2022-102_96-P1_Fam1_R1_06	Fam1	6500 PSI	AB	AB	A	AB	AB	AB	AB	AB	A	AB	AB	A	AB	AB	AB	AB	AB	AB	AB	A	NA	6500PSI.R1	0	4	16	0	0	0	0	20	0	Diploid
2022-PLATE-9_2022-102_97-P1_Fam1_R1_07	Fam1	6500 PSI	AB	AB	AB	NA	AB	AB	AB	AB	AB	AB	A	AB	A	AB	AB	AB	AB	A	A	A	NA	6500PSI.R1	1	5	14	0	0	0	0	20	0	Diploid
2022-PLATE-9_2022-102_98-P1_Fam1_R1_08	Fam1	6500 PSI	AB	AB	A	AB	A	AB	AB	AB	AB	A	AB	A	AB	A	AB	A	AB	A	A	AB	NA	6500PSI.R1	0	8	12	0	0	0	0	20	0	Diploid
2022-PLATE-9_2022-102_99-P1_Fam1_R1_09	Fam1	6500 PSI	AB	AB	AB	AB	AB	AB	AB	A	AB	AB	A	AB	AB	AB	AB	AB	AB	AB	A	AB	NA	6500PSI.R1	0	3	17	0	0	0	0	20	0	Diploid

## Sheet: Experiment 1_parr
Sample_Name	family	treatment	SSsp2201_genotype	SSsp2210_genotype	SsaD157_genotype	Sp1605_genotype	Sp2216_genotype	Ssa14_genotype	Ssa197_genotype	SsaF43_genotype	SsOsl85_genotype	EST107_genotype	EST19_genotype	EST28_genotype	EST68_genotype	Sleel53_genotype	Sleen82_genotype	SsOSL25_genotype	SsSP2215_genotype	Ssa407_genotype	Ssa412_genotype	Ssleer15.1_genotype	Aberration	replicate	count_NA	count_A	count_AB	count_AAB	count_ABB	count_ABC	count_trisomic	sum	prop.trisomic	ploidy
2023-PLATE-104_2022-2345_250-Pressure_0PSI_R2_125	Fam2	0 PSI	AB	AB	AB	A	AB	A	AB	AB	AB	AB	NA	AB	AB	AB	A	AB	AB	AB	AB	AB	bp shift	0PSI.R2	1	3	16	0	0	0	0	20	0	Diploid
2023-PLATE-104_2023-435_10-Pressure_6500PSI_R1_015	Fam1	6500 PSI	AB	AB	AB	AB	A	AB	AB	AB	AB	AB	AB	A	AB	A	A	A	AB	AB	A	A	bp shift	6500PSI.R1	0	7	13	0	0	0	0	20	0	Diploid
2023-PLATE-104_2023-435_11-Pressure_6500PSI_R1_017	Fam3	6500 PSI	AB	AB	AB	AB	AB	A	AB	A	AB	A	AB	A	A	A	AB	A	AB	AB	AB	A	NA	6500PSI.R1	0	8	12	0	0	0	0	20	0	Diploid
2023-PLATE-104_2023-435_12-Pressure_6500PSI_R1_018	Fam2	6500 PSI	AB	AB	AB	NA	AB	A	AB	AB	AB	AB	AB	AB	AB	A	AB	AB	AB	AB	AB	AB	NA	6500PSI.R1	1	2	17	0	0	0	0	20	0	Diploid
2023-PLATE-104_2023-435_13-Pressure_6500PSI_R1_019	Fam3	6500 PSI	ABB	ABC	ABC	ABB	ABC	AAB	ABC	ABB	ABC	A	ABC	AAB	ABB	A	AAB	A	ABC	ABC	A	AAB	NA	6500PSI.R1	0	4	0	4	4	8	16	20	1	Triploid
2023-PLATE-104_2023-435_14-Pressure_6500PSI_R1_020	Fam1	6500 PSI	AB	AB	AB	AB	AB	AB	AB	A	AB	AB	A	A	A	A	AB	AB	AB	A	A	AB	NA	6500PSI.R1	0	7	13	0	0	0	0	20	0	Diploid
2023-PLATE-104_2023-435_15-Pressure_6500PSI_R1_021	Fam3	6500 PSI	AAB	ABC	ABC	ABB	ABC	AAB	ABC	ABB	ABC	AAB	ABC	AAB	ABC	AAB	AAB	AAB	ABC	ABB	AAB	AAB	NA	6500PSI.R1	0	0	0	9	3	8	20	20	1	Triploid
2023-PLATE-104_2023-435_16-Pressure_6500PSI_R1_022	Fam1	6500 PSI	AB	AB	A	AB	AB	AB	AB	A	AB	AB	AB	A	AB	AB	AB	AB	AB	AB	AB	A	NA	6500PSI.R1	0	4	16	0	0	0	0	20	0	Diploid
2023-PLATE-104_2023-435_17-Pressure_6500PSI_R1_024	Fam2	6500 PSI	AB	AB	AB	A	AB	AB	AB	AB	AB	AB	AB	AB	AB	AB	A	AB	AB	AB	A	A	NA	6500PSI.R1	0	4	16	0	0	0	0	20	0	Diploid
2023-PLATE-104_2023-435_18-Pressure_6500PSI_R1_025	Fam3	6500 PSI	AB	AB	AB	AB	AB	A	AB	AB	AB	A	AB	AB	AB	AB	AB	A	AB	AB	AB	A	NA	6500PSI.R1	0	4	16	0	0	0	0	20	0	Diploid
2023-PLATE-104_2023-435_19-Pressure_6500PSI_R1_026	Fam2	6500 PSI	AB	AB	AB	A	AB	A	AB	A	AB	AB	AB	AB	AB	AB	AB	AB	AB	A	AB	AB	NA	6500PSI.R1	0	4	16	0	0	0	0	20	0	Diploid
2023-PLATE-104_2023-435_1-Pressure_6500PSI_R1_001	Fam1	6500 PSI	AB	AB	AB	AB	AB	AB	AB	AB	AB	AB	AB	AB	A	AB	AB	AB	AB	AB	A	A	NA	6500PSI.R1	0	3	17	0	0	0	0	20	0	Diploid
2023-PLATE-104_2023-435_20-Pressure_6500PSI_R1_027	Fam2	6500 PSI	AB	AB	AB	A	AB	A	AB	AB	AB	AB	AB	AB	A	AB	AB	AB	AB	AB	AB	A	NA	6500PSI.R1	0	4	16	0	0	0	0	20	0	Diploid
2023-PLATE-104_2023-435_21-Pressure_6500PSI_R1_028	Fam1	6500 PSI	AB	AB	AB	AB	AB	AB	AB	AB	AB	A	AB	A	AB	A	AB	AB	AB	AB	A	AB	NA	6500PSI.R1	0	4	16	0	0	0	0	20	0	Diploid
2023-PLATE-104_2023-435_22-Pressure_6500PSI_R1_029	Fam1	6500 PSI	AB	AB	AB	AB	AB	AB	AB	AB	A	A	AB	A	A	AB	AB	AB	AB	AB	A	AB	NA	6500PSI.R1	0	5	15	0	0	0	0	20	0	Diploid
2023-PLATE-104_2023-435_23-Pressure_6500PSI_R1_030	Fam1	6500 PSI	AB	AB	A	AB	AB	AB	AB	A	A	AB	AB	A	A	AB	AB	AB	AB	AB	A	A	NA	6500PSI.R1	0	7	13	0	0	0	0	20	0	Diploid
2023-PLATE-104_2023-435_24-Pressure_6500PSI_R1_032	Fam1	6500 PSI	AB	AB	A	AB	A	AB	AB	AB	AB	AB	AB	AB	A	AB	AB	A	AB	AB	AB	AB	NA	6500PSI.R1	0	4	16	0	0	0	0	20	0	Diploid
2023-PLATE-104_2023-435_25-Pressure_6500PSI_R1_033	Fam1	6500 PSI	AB	AB	AB	NA	A	A	AB	NA	AB	AB	A	A	AB	AB	AB	AB	AB	AB	AB	A	NA	6500PSI.R1	2	5	13	0	0	0	0	20	0	Diploid
2023-PLATE-104_2023-435_27-Pressure_6500PSI_R1_036	Fam1	6500 PSI	AB	AB	A	AB	AB	AB	AB	NA	AB	AB	AB	A	AB	AB	AB	A	AB	AB	AB	A	NA	6500PSI.R1	1	4	15	0	0	0	0	20	0	Diploid
2023-PLATE-104_2023-435_28-Pressure_6500PSI_R1_037	Fam1	6500 PSI	AB	AB	AB	AB	A	A	AB	NA	AB	A	AB	A	AB	A	AB	A	AB	AB	AB	AB	NA	6500PSI.R1	1	6	13	0	0	0	0	20	0	Diploid
2023-PLATE-104_2023-435_29-Pressure_6500PSI_R1_038	Fam1	6500 PSI	AB	AB	AB	AB	AB	A	AB	AB	AB	AB	A	AB	AB	AB	AB	AB	AB	A	A	AB	NA	6500PSI.R1	0	4	16	0	0	0	0	20	0	Diploid
2023-PLATE-104_2023-435_2-Pressure_6500PSI_R1_003	Fam2	6500 PSI	AB	AB	AB	A	AB	AB	AB	AB	AB	A	A	AB	AB	A	A	AB	AB	AB	A	AB	NA	6500PSI.R1	0	6	14	0	0	0	0	20	0	Diploid
2023-PLATE-104_2023-435_30-Pressure_6500PSI_R1_040	Fam3	6500 PSI	AB	AB	AB	AB	AB	A	AB	A	AB	A	AB	AB	AB	AB	AB	AB	AB	A	A	AB	NA	6500PSI.R1	0	5	15	0	0	0	0	20	0	Diploid
2023-PLATE-104_2023-435_31-Pressure_6500PSI_R1_041	Fam3	6500 PSI	AB	AB	AB	AB	AB	A	AB	A	AB	AB	AB	AB	A	A	AB	AB	AB	A	AB	A	NA	6500PSI.R1	0	6	14	0	0	0	0	20	0	Diploid
2023-PLATE-104_2023-435_32-Pressure_6500PSI_R1_043	Fam3	6500 PSI	AB	AB	AB	AB	ABC	A	AB	AB	AB	A	AB	AB	AB	A	AB	AB	ABC	A	A	A	NA	6500PSI.R1	0	6	12	0	0	2	2	20	0.142857	Aneuploid
2023-PLATE-104_2023-435_33-Pressure_6500PSI_R1_045	Fam1	6500 PSI	AB	AB	AB	AB	AB	AB	AB	AB	AB	AB	AB	AB	A	AB	AB	AB	AB	AB	A	AB	NA	6500PSI.R1	0	2	18	0	0	0	0	20	0	Diploid
2023-PLATE-104_2023-435_34-Pressure_6500PSI_R1_046	Fam1	6500 PSI	AB	AB	A	AB	A	AB	AB	AB	A	AB	AB	A	A	NA	AB	AB	AB	A	AB	AB	NA	6500PSI.R1	1	6	13	0	0	0	0	20	0	Diploid
2023-PLATE-104_2023-435_35-Pressure_6500PSI_R1_048	Fam1	6500 PSI	AB	AB	AB	AB	AB	AB	AB	A	AB	A	AB	AB	A	A	AB	A	AB	AB	A	AB	NA	6500PSI.R1	0	6	14	0	0	0	0	20	0	Diploid
2023-PLATE-104_2023-435_36-Pressure_6500PSI_R1_049	Fam2	6500 PSI	AB	AB	AB	NA	AB	AB	AB	AB	AB	AB	A	AB	AB	A	A	AB	AB	A	AB	AB	NA	6500PSI.R1	1	4	15	0	0	0	0	20	0	Diploid
2023-PLATE-104_2023-435_37-Pressure_6500PSI_R1_050	Fam1	6500 PSI	AB	AB	AB	AB	A	AB	AB	AB	AB	AB	AB	A	AB	AB	AB	AB	AB	A	AB	A	NA	6500PSI.R1	0	4	16	0	0	0	0	20	0	Diploid
2023-PLATE-104_2023-435_38-Pressure_6500PSI_R1_051	Fam3	6500 PSI	AB	AB	AB	AB	AB	AB	AB	A	AB	AB	AB	AB	AB	AB	AB	A	AB	AB	AB	AB	NA	6500PSI.R1	0	2	18	0	0	0	0	20	0	Diploid
2023-PLATE-104_2023-435_39-Pressure_6500PSI_R1_052	Fam1	6500 PSI	AB	AB	AB	AB	AB	A	AB	A	AB	AB	AB	A	AB	AB	AB	AB	AB	A	AB	AB	NA	6500PSI.R1	0	4	16	0	0	0	0	20	0	Diploid
2023-PLATE-104_2023-435_3-Pressure_6500PSI_R1_004	Fam1	6500 PSI	AB	AB	AB	AB	AB	AB	AB	A	AB	A	AB	AB	AB	AB	AB	AB	AB	AB	AB	AB	NA	6500PSI.R1	0	2	18	0	0	0	0	20	0	Diploid
2023-PLATE-104_2023-435_40-Pressure_6500PSI_R1_053	Fam1	6500 PSI	AB	AB	AB	AB	A	A	AB	AB	AB	AB	A	AB	AB	A	AB	AB	AB	AB	A	AB	NA	6500PSI.R1	0	5	15	0	0	0	0	20	0	Diploid
2023-PLATE-104_2023-435_41-Pressure_6500PSI_R1_054	Fam3	6500 PSI	AB	AB	AB	AB	AB	AB	AB	A	AB	AB	AB	AB	AB	AB	AB	A	AB	AB	A	AB	NA	6500PSI.R1	0	3	17	0	0	0	0	20	0	Diploid
2023-PLATE-104_2023-435_42-Pressure_6500PSI_R1_055	Fam2	6500 PSI	AB	AB	AB	NA	AB	AB	AB	A	A	AB	AB	A	AB	A	AB	AB	AB	AB	AB	AB	NA	6500PSI.R1	1	4	15	0	0	0	0	20	0	Diploid
2023-PLATE-104_2023-435_43-Pressure_6500PSI_R1_056	Fam1	6500 PSI	AB	AB	A	AB	AB	A	AB	A	AB	AB	AB	A	AB	A	AB	AB	AB	A	AB	A	NA	6500PSI.R1	0	7	13	0	0	0	0	20	0	Diploid
2023-PLATE-104_2023-435_44-Pressure_6500PSI_R1_058	Fam1	6500 PSI	AB	AB	AB	AB	AB	AB	AB	AB	AB	AB	AB	AB	A	A	AB	AB	AB	A	A	A	NA	6500PSI.R1	0	5	15	0	0	0	0	20	0	Diploid
2023-PLATE-104_2023-435_45-Pressure_6500PSI_R1_060	Fam1	6500 PSI	AB	AB	AB	AB	AB	AB	AB	AB	AB	AB	AB	A	A	A	AB	AB	AB	A	AB	A	NA	6500PSI.R1	0	5	15	0	0	0	0	20	0	Diploid
2023-PLATE-104_2023-435_46-Pressure_6500PSI_R1_061	Fam1	6500 PSI	AB	AB	A	AB	A	A	AB	AB	AB	AB	A	A	AB	A	AB	AB	AB	AB	A	A	NA	6500PSI.R1	0	8	12	0	0	0	0	20	0	Diploid
2023-PLATE-104_2023-435_47-Pressure_6500PSI_R1_062	Fam3	6500 PSI	AB	AB	AB	AB	AB	AB	AB	A	AB	AB	AB	AB	AB	AB	AB	A	AB	AB	A	A	NA	6500PSI.R1	0	4	16	0	0	0	0	20	0	Diploid
2023-PLATE-104_2023-435_48-Pressure_6500PSI_R1_063	Fam2	6500 PSI	AB	AB	AB	NA	AB	AB	AB	NA	AB	AB	AB	AB	AB	A	A	AB	AB	AB	A	AB	NA	6500PSI.R1	2	3	15	0	0	0	0	20	0	Diploid
2023-PLATE-104_2023-435_49-Pressure_6500PSI_R1_064	Fam3	6500 PSI	AB	AB	AB	AB	AB	A	AB	A	AB	AB	AB	A	AB	A	AB	A	AB	AB	AB	AB	NA	6500PSI.R1	0	5	15	0	0	0	0	20	0	Diploid
2023-PLATE-104_2023-435_4-Pressure_6500PSI_R1_005	Fam1	6500 PSI	AB	AB	AB	AB	AB	AB	AB	A	AB	AB	AB	A	AB	AB	AB	A	AB	A	AB	A	NA	6500PSI.R1	0	5	15	0	0	0	0	20	0	Diploid
2023-PLATE-104_2023-435_50-Pressure_6500PSI_R1_067	Fam1	6500 PSI	AB	AB	AB	AB	AB	AB	AB	AB	AB	A	AB	AB	AB	A	AB	A	AB	A	AB	AB	NA	6500PSI.R1	0	4	16	0	0	0	0	20	0	Diploid
2023-PLATE-104_2023-435_51-Pressure_6500PSI_R1_068	Fam1	6500 PSI	AB	AB	A	AB	AB	A	AB	AB	A	AB	A	AB	AB	AB	AB	AB	AB	AB	A	A	NA	6500PSI.R1	0	6	14	0	0	0	0	20	0	Diploid
2023-PLATE-104_2023-435_52-Pressure_6500PSI_R1_069	Fam1	6500 PSI	AB	AB	AB	AB	A	A	AB	A	A	AB	AB	A	AB	A	AB	A	AB	AB	A	A	NA	6500PSI.R1	0	9	11	0	0	0	0	20	0	Diploid
2023-PLATE-104_2023-435_53-Pressure_6500PSI_R1_070	Fam1	6500 PSI	AB	AB	A	AB	A	A	AB	A	AB	AB	AB	A	AB	A	AB	AB	AB	A	A	A	NA	6500PSI.R1	0	9	11	0	0	0	0	20	0	Diploid
2023-PLATE-104_2023-435_54-Pressure_6500PSI_R1_071	Fam2	6500 PSI	AB	AB	AB	A	AB	A	AB	A	AB	AB	A	AB	AB	AB	A	AB	AB	A	A	AB	NA	6500PSI.R1	0	7	13	0	0	0	0	20	0	Diploid
2023-PLATE-104_2023-435_55-Pressure_6500PSI_R1_072	Fam2	6500 PSI	AB	AB	A	A	AB	A	AB	AB	A	A	AB	A	A	AB	A	AB	AB	AB	AB	AB	NA	6500PSI.R1	0	8	12	0	0	0	0	20	0	Diploid
2023-PLATE-104_2023-435_56-Pressure_6500PSI_R1_075	Fam2	6500 PSI	AB	AB	AB	NA	AB	AB	AB	A	A	A	AB	A	AB	AB	AB	AB	AB	A	A	A	NA	6500PSI.R1	1	7	12	0	0	0	0	20	0	Diploid
2023-PLATE-104_2023-435_57-Pressure_6500PSI_R1_076	Fam2	6500 PSI	AB	AB	A	A	AB	AB	AB	AB	AB	A	A	AB	AB	AB	AB	AB	AB	AB	A	AB	NA	6500PSI.R1	0	5	15	0	0	0	0	20	0	Diploid
2023-PLATE-104_2023-435_58-Pressure_6500PSI_R1_077	Fam2	6500 PSI	AB	AB	AB	NA	AB	A	AB	AB	AB	AB	A	AB	A	AB	AB	AB	AB	AB	A	A	NA	6500PSI.R1	1	5	14	0	0	0	0	20	0	Diploid
2023-PLATE-104_2023-435_59-Pressure_6500PSI_R1_078	Fam2	6500 PSI	AB	AB	AB	NA	AB	A	AB	NA	AB	AB	AB	AB	AB	AB	AB	AB	AB	A	A	AB	NA	6500PSI.R1	2	3	15	0	0	0	0	20	0	Diploid
2023-PLATE-104_2023-435_5-Pressure_6500PSI_R1_008	Fam1	6500 PSI	AB	AB	AB	AB	AB	AB	AB	AB	AB	AB	A	A	A	AB	AB	A	AB	AB	A	A	NA	6500PSI.R1	0	6	14	0	0	0	0	20	0	Diploid
2023-PLATE-104_2023-435_60-Pressure_6500PSI_R1_080	Fam2	6500 PSI	AB	AB	A	NA	AB	AB	AB	AB	AB	A	A	AB	AB	A	A	AB	AB	AB	AB	AB	NA	6500PSI.R1	1	5	14	0	0	0	0	20	0	Diploid
2023-PLATE-104_2023-435_62-Pressure_6500PSI_R1_084	Fam1	6500 PSI	AB	AB	AB	AB	AB	A	AB	A	AB	AB	AB	A	AB	A	AB	A	AB	AB	A	A	NA	6500PSI.R1	0	7	13	0	0	0	0	20	0	Diploid
2023-PLATE-104_2023-435_63-Pressure_6500PSI_R1_085	Fam3	6500 PSI	AB	AB	AB	AB	AB	AB	AB	A	AB	A	AB	AB	AB	A	AB	AB	AB	A	A	AB	NA	6500PSI.R1	0	5	15	0	0	0	0	20	0	Diploid
2023-PLATE-104_2023-435_64-Pressure_6500PSI_R1_086	Fam1	6500 PSI	AB	AB	AB	AB	AB	AB	AB	A	A	AB	AB	AB	AB	A	AB	AB	AB	AB	AB	AB	NA	6500PSI.R1	0	3	17	0	0	0	0	20	0	Diploid
2023-PLATE-104_2023-435_65-Pressure_6500PSI_R1_087	Fam3	6500 PSI	AAB	ABC	ABC	ABB	ABC	A	ABC	ABB	ABC	A	ABC	ABC	AAB	A	AAB	A	ABC	AAB	ABB	AAB	NA	6500PSI.R1	0	4	0	5	3	8	16	20	1	Triploid
2023-PLATE-104_2023-435_66-Pressure_6500PSI_R1_088	Fam2	6500 PSI	AB	AB	AB	NA	AB	AB	AB	AB	A	AB	AB	AB	AB	AB	A	AB	AB	AB	A	AB	NA	6500PSI.R1	1	3	16	0	0	0	0	20	0	Diploid
2023-PLATE-104_2023-435_67-Pressure_6500PSI_R1_089	Fam2	6500 PSI	AB	AB	AB	A	AB	A	AB	A	AB	AB	AB	AB	A	AB	A	AB	AB	A	AB	A	NA	6500PSI.R1	0	7	13	0	0	0	0	20	0	Diploid
2023-PLATE-104_2023-435_68-Pressure_6500PSI_R1_090	Fam2	6500 PSI	AB	AB	AB	NA	AB	AB	AB	AB	AB	AB	AB	AB	AB	A	AB	AB	AB	AB	AB	AB	NA	6500PSI.R1	1	1	18	0	0	0	0	20	0	Diploid
2023-PLATE-104_2023-435_69-Pressure_6500PSI_R1_091	Fam2	6500 PSI	AB	AB	AB	NA	AB	AB	AB	AB	AB	AB	AB	A	AB	AB	AB	AB	AB	A	AB	AB	NA	6500PSI.R1	1	2	17	0	0	0	0	20	0	Diploid
2023-PLATE-104_2023-435_6-Pressure_6500PSI_R1_009	Fam2	6500 PSI	AB	AB	AB	A	AB	AB	AB	NA	AB	AB	AB	AB	AB	A	AB	AB	AB	AB	A	AB	NA	6500PSI.R1	1	3	16	0	0	0	0	20	0	Diploid
2023-PLATE-104_2023-435_70-Pressure_6500PSI_R1_093	Fam1	6500 PSI	AB	AB	A	AB	AB	A	AB	A	AB	A	A	AB	AB	A	AB	AB	AB	A	A	A	NA	6500PSI.R1	0	9	11	0	0	0	0	20	0	Diploid
2023-PLATE-104_2023-435_71-Pressure_6500PSI_R1_094	Fam1	6500 PSI	AB	AB	A	AB	AB	AB	AB	AB	AB	AB	A	AB	AB	A	AB	A	AB	AB	A	AB	NA	6500PSI.R1	0	5	15	0	0	0	0	20	0	Diploid
2023-PLATE-104_2023-435_72-Pressure_6500PSI_R1_096	Fam2	6500 PSI	AB	AB	AB	NA	AB	A	AB	AB	AB	AB	AB	AB	AB	AB	AB	AB	AB	A	AB	AB	NA	6500PSI.R1	1	2	17	0	0	0	0	20	0	Diploid
2023-PLATE-104_2023-435_73-Pressure_6500PSI_R1_098	Fam2	6500 PSI	AB	AB	A	NA	AB	AB	AB	A	AB	AB	A	AB	AB	AB	A	AB	AB	AB	A	A	NA	6500PSI.R1	1	6	13	0	0	0	0	20	0	Diploid
2023-PLATE-104_2023-435_74-Pressure_6500PSI_R1_099	Fam2	6500 PSI	AB	AB	AB	NA	AB	A	AB	A	AB	AB	AB	AB	AB	A	AB	AB	AB	A	AB	AB	NA	6500PSI.R1	1	4	15	0	0	0	0	20	0	Diploid
2023-PLATE-104_2023-435_75-Pressure_6500PSI_R1_100	Fam1	6500 PSI	AB	AB	AAB	AB	AB	A	AB	AB	AB	A	A	A	AB	A	AB	AB	AB	AB	A	A	2 paternal	6500PSI.R1	0	7	12	1	0	0	1	20	0.0769231	Aneuploid
2023-PLATE-104_2023-435_76-Pressure_6500PSI_R1_101	Fam2	6500 PSI	AB	AB	A	NA	AB	AB	AB	A	A	AB	AB	A	AB	A	AB	AB	AB	A	A	A	NA	6500PSI.R1	1	8	11	0	0	0	0	20	0	Diploid
2023-PLATE-104_2023-435_77-Pressure_6500PSI_R1_102	Fam3	6500 PSI	AB	AB	AB	NA	AB	A	AB	AB	AB	AB	AB	A	A	A	AB	A	AB	AB	AB	AB	NA	6500PSI.R1	1	5	14	0	0	0	0	20	0	Diploid
2023-PLATE-104_2023-435_78-Pressure_6500PSI_R1_104	Fam1	6500 PSI	AB	AB	AB	AB	AB	A	AB	AB	AB	AB	AB	AB	AB	A	AB	AB	AB	AB	A	A	NA	6500PSI.R1	0	4	16	0	0	0	0	20	0	Diploid
2023-PLATE-104_2023-435_79-Pressure_6500PSI_R1_105	Fam1	6500 PSI	AB	AB	AB	NA	AB	AB	AB	AB	AB	AB	AB	A	A	A	AB	AB	AB	A	AB	A	NA	6500PSI.R1	1	5	14	0	0	0	0	20	0	Diploid
2023-PLATE-104_2023-435_7-Pressure_6500PSI_R1_010	Fam3	6500 PSI	AB	AB	AB	AB	AB	A	AB	A	AB	A	AB	NA	NA	AB	AB	A	AB	AB	A	A	NA	6500PSI.R1	2	6	12	0	0	0	0	20	0	Diploid
2023-PLATE-104_2023-435_80-Pressure_6500PSI_R1_107	Fam2	6500 PSI	AB	AB	AB	A	AB	A	AB	NA	AB	AB	AB	AB	A	AB	A	AB	AB	A	AB	AB	NA	6500PSI.R1	1	5	14	0	0	0	0	20	0	Diploid
2023-PLATE-104_2023-435_81-Pressure_6500PSI_R1_108	Fam2	6500 PSI	AB	AB	AB	A	AB	A	AB	AB	AB	AB	AB	AB	A	A	AB	AB	AB	A	AB	AB	NA	6500PSI.R1	0	5	15	0	0	0	0	20	0	Diploid
2023-PLATE-104_2023-435_82-Pressure_6500PSI_R1_109	Fam1	6500 PSI	AB	AB	AB	AB	AB	AB	AB	A	A	AB	AB	AB	AB	AB	AB	ABC	AB	ABC	AB	A	NA	6500PSI.R1	0	3	15	0	0	2	2	20	0.117647	Aneuploid
2023-PLATE-104_2023-435_83-Pressure_6500PSI_R1_110	Fam3	6500 PSI	AAB	ABB	ABC	NA	ABC	A	ABC	A	ABB	A	ABC	ABC	AAB	A	AAB	AAB	ABC	ABB	ABB	AAB	NA	6500PSI.R1	1	4	0	5	4	6	15	20	1	Triploid
2023-PLATE-104_2023-435_84-Pressure_6500PSI_R1_111	Fam1	6500 PSI	AB	AB	AB	AB	AB	A	AB	A	AB	AB	A	AB	AB	AB	AB	AB	AB	A	A	A	NA	6500PSI.R1	0	6	14	0	0	0	0	20	0	Diploid
2023-PLATE-104_2023-435_85-Pressure_6500PSI_R1_112	Fam1	6500 PSI	AB	AB	AB	NA	A	A	AB	AB	AB	AB	AB	AB	AB	AB	AB	AB	AB	AB	AB	AB	NA	6500PSI.R1	1	2	17	0	0	0	0	20	0	Diploid
2023-PLATE-104_2023-435_86-Pressure_6500PSI_R1_115	Fam1	6500 PSI	AB	AB	AB	AB	AB	A	AB	AB	AB	A	A	AB	AB	A	AB	A	AB	AB	A	AB	NA	6500PSI.R1	0	6	14	0	0	0	0	20	0	Diploid
2023-PLATE-104_2023-435_87-Pressure_6500PSI_R1_117	Fam2	6500 PSI	AB	AB	AB	NA	AB	AB	AB	AB	AB	A	A	AB	AB	A	AB	AB	AB	A	AB	AB	NA	6500PSI.R1	1	4	15	0	0	0	0	20	0	Diploid
2023-PLATE-104_2023-435_88-Pressure_6500PSI_R1_119	Fam1	6500 PSI	AB	AB	A	AB	AB	A	AB	AB	AB	A	A	AB	AB	AB	AAB	AB	AB	AB	A	AB	NA	6500PSI.R1	0	5	14	1	0	0	1	20	0.0666667	Aneuploid
2023-PLATE-104_2023-435_89-Pressure_6500PSI_R1_121	Fam1	6500 PSI	AB	AB	A	AB	AB	A	AB	AB	AB	AB	AB	AB	AB	A	AB	AB	AB	AB	AB	A	NA	6500PSI.R1	0	4	16	0	0	0	0	20	0	Diploid
2023-PLATE-104_2023-435_8-Pressure_6500PSI_R1_011	Fam1	6500 PSI	AB	AB	A	AB	AB	AB	AB	AB	AB	AB	A	A	AB	A	AB	AB	AB	AB	AB	A	NA	6500PSI.R1	0	5	15	0	0	0	0	20	0	Diploid
2023-PLATE-104_2023-435_90-Pressure_6500PSI_R1_122	Fam2	6500 PSI	AB	AB	A	NA	AB	A	AB	A	AB	AB	AB	A	A	A	A	AB	AB	A	AB	AB	NA	6500PSI.R1	1	8	11	0	0	0	0	20	0	Diploid
2023-PLATE-104_2023-435_91-Pressure_6500PSI_R1_124	Fam2	6500 PSI	AB	AB	AB	NA	AB	AB	AB	AB	AB	AB	AB	A	AB	A	A	AB	AB	AB	AB	AB	NA	6500PSI.R1	1	3	16	0	0	0	0	20	0	Diploid
2023-PLATE-104_2023-435_92-Pressure_6500PSI_R1_126	Fam2	6500 PSI	AB	AB	AB	A	AB	A	AB	A	A	AB	AB	AB	A	A	AB	AB	AB	A	AB	AB	NA	6500PSI.R1	0	7	13	0	0	0	0	20	0	Diploid
2023-PLATE-104_2023-435_93-Pressure_6500PSI_R1_127	Fam3	6500 PSI	AAB	ABC	ABC	ABB	ABC	A	ABC	A	ABC	A	ABC	ABC	AAB	AAB	AAB	AAB	ABC	ABB	AAB	AAB	NA	6500PSI.R1	0	3	0	7	2	8	17	20	1	Triploid
2023-PLATE-104_2023-435_9-Pressure_6500PSI_R1_014	Fam2	6500 PSI	AB	AB	A	A	AB	A	AB	AB	AB	NA	AB	A	AB	AB	A	AB	AB	NA	AB	AB	NA	6500PSI.R1	2	5	13	0	0	0	0	20	0	Diploid
2023-PLATE-105_2023-435_100-Pressure_6500PSI_R1_140	Fam3	6500 PSI	AB	AB	AB	NA	NA	NA	AB	AB	AB	A	AB	AB	AB	A	AB	AB	AB	AB	A	A	NA	6500PSI.R1	3	4	13	0	0	0	0	20	0	Diploid
2023-PLATE-105_2023-435_101-Pressure_6500PSI_R1_141	Fam3	6500 PSI	AAB	ABC	ABC	ABB	ABC	A	ABC	ABB	ABC	AAB	ABC	ABC	ABB	AAB	AAB	A	ABC	ABC	AAB	AAB	NA	6500PSI.R1	0	2	0	6	3	9	18	20	1	Triploid
2023-PLATE-105_2023-435_102-Pressure_6500PSI_R1_142	Fam2	6500 PSI	AB	AB	AB	A	AB	AB	AB	NA	AB	AB	AB	AB	AB	AB	AB	AB	AB	A	A	AB	NA	6500PSI.R1	1	3	16	0	0	0	0	20	0	Diploid
2023-PLATE-105_2023-435_103-Pressure_6500PSI_R1_144	Fam1	6500 PSI	AB	AB	AB	AB	AB	A	AB	A	AB	AB	AB	AB	AB	AB	AB	A	AB	AB	AB	A	NA	6500PSI.R1	0	4	16	0	0	0	0	20	0	Diploid
2023-PLATE-105_2023-435_104-Pressure_6500PSI_R1_145	Fam1	6500 PSI	AB	AB	A	AB	AB	AB	AB	A	AB	AB	A	AB	A	AB	AB	AB	AB	AB	A	A	NA	6500PSI.R1	0	6	14	0	0	0	0	20	0	Diploid
2023-PLATE-105_2023-435_105-Pressure_6500PSI_R1_146	Fam1	6500 PSI	AB	AB	AB	AB	AB	A	AB	A	AB	A	AB	AB	AB	AB	AB	AB	AB	A	A	A	NA	6500PSI.R1	0	6	14	0	0	0	0	20	0	Diploid
2023-PLATE-105_2023-435_106-Pressure_6500PSI_R1_148	Fam1	6500 PSI	AB	AB	A	AB	AB	A	ABB	AB	AB	AB	A	A	AB	AB	AB	AB	AB	AB	AB	A	NA	6500PSI.R1	0	5	14	0	1	0	1	20	0.0666667	Aneuploid
2023-PLATE-105_2023-435_107-Pressure_6500PSI_R1_149	Fam3	6500 PSI	AAB	ABC	ABC	ABB	ABB	AAB	ABC	ABB	ABC	AAB	ABC	AAB	ABC	A	AAB	A	ABC	AAB	AAB	A	NA	6500PSI.R1	0	3	0	7	3	7	17	20	1	Triploid
2023-PLATE-105_2023-435_108-Pressure_6500PSI_R2_003	Fam1	6500 PSI	AB	AB	AB	NA	AB	A	AB	A	AB	A	AB	AB	AB	AB	AB	AB	AB	AB	AB	AB	NA	6500PSI.R2	1	3	16	0	0	0	0	20	0	Diploid
2023-PLATE-105_2023-435_109-Pressure_6500PSI_R2_005	Fam1	6500 PSI	AB	AB	A	AB	AB	AB	AB	A	AB	A	AB	A	A	A	AB	AB	AB	AB	AB	A	NA	6500PSI.R2	0	7	13	0	0	0	0	20	0	Diploid
2023-PLATE-105_2023-435_110-Pressure_6500PSI_R2_006	Fam1	6500 PSI	AB	AB	AB	AB	AB	AB	AB	A	A	AB	A	AB	A	A	AB	AB	AB	AB	A	AB	NA	6500PSI.R2	0	6	14	0	0	0	0	20	0	Diploid
2023-PLATE-105_2023-435_111-Pressure_6500PSI_R2_008	Fam1	6500 PSI	AB	AB	AB	AB	AB	AB	AB	AB	A	AB	A	AB	A	AB	AB	AB	AB	AB	A	AB	NA	6500PSI.R2	0	4	16	0	0	0	0	20	0	Diploid
2023-PLATE-105_2023-435_112-Pressure_6500PSI_R2_009	Fam1	6500 PSI	AB	AB	A	AB	AB	AB	AB	A	AB	A	AB	A	AB	AB	AB	AB	AB	AB	A	A	NA	6500PSI.R2	0	6	14	0	0	0	0	20	0	Diploid
2023-PLATE-105_2023-435_113-Pressure_6500PSI_R2_010	Fam1	6500 PSI	AB	AB	A	AB	AB	AB	AB	AB	AB	AB	AB	AB	AB	AB	AB	AB	AB	AB	AB	AB	NA	6500PSI.R2	0	1	19	0	0	0	0	20	0	Diploid
2023-PLATE-105_2023-435_114-Pressure_6500PSI_R2_012	Fam1	6500 PSI	AB	AB	A	AB	AB	A	AB	A	A	AB	A	AB	AB	AB	AB	AB	AB	AB	AB	AB	NA	6500PSI.R2	0	5	15	0	0	0	0	20	0	Diploid
2023-PLATE-105_2023-435_115-Pressure_6500PSI_R2_014	Fam2	6500 PSI	AB	AB	AB	NA	AB	A	AB	A	AB	AB	A	AB	AB	AB	A	AB	AB	A	A	AB	NA	6500PSI.R2	1	6	13	0	0	0	0	20	0	Diploid
2023-PLATE-105_2023-435_116-Pressure_6500PSI_R2_015	Fam1	6500 PSI	AB	AB	AB	AB	AB	A	AB	AB	AB	AB	A	A	AB	A	AB	A	AB	AB	AB	A	NA	6500PSI.R2	0	6	14	0	0	0	0	20	0	Diploid
2023-PLATE-105_2023-435_117-Pressure_6500PSI_R2_016	Fam3	6500 PSI	AAB	ABC	ABC	ABB	ABC	A	ABC	ABB	ABC	A	ABC	ABC	AAB	A	AAB	AAB	ABC	ABB	AAB	AAB	NA	6500PSI.R2	0	3	0	6	3	8	17	20	1	Triploid
2023-PLATE-105_2023-435_118-Pressure_6500PSI_R2_017	Fam3	6500 PSI	AAB	ABC	ABC	ABB	ABC	A	ABC	A	AAB	AAB	ABC	AAB	AAB	AAB	AAB	AAB	ABC	ABB	AAB	AAB	NA	6500PSI.R2	0	2	0	10	2	6	18	20	1	Triploid
2023-PLATE-105_2023-435_119-Pressure_6500PSI_R2_018	Fam2	6500 PSI	AB	AB	A	NA	AB	A	AB	AB	AB	AB	A	AB	AB	A	AB	AB	AB	AB	A	A	NA	6500PSI.R2	1	6	13	0	0	0	0	20	0	Diploid
2023-PLATE-105_2023-435_120-Pressure_6500PSI_R2_020	Fam3	6500 PSI	AB	AB	AB	AB	AB	A	AB	A	AB	AB	AB	AB	AB	A	AB	AB	AB	A	AB	A	NA	6500PSI.R2	0	5	15	0	0	0	0	20	0	Diploid
2023-PLATE-105_2023-435_121-Pressure_6500PSI_R2_021	Fam1	6500 PSI	AB	AB	AB	AB	AB	AB	AB	A	A	AB	AB	AB	A	AB	AB	AB	AB	AB	AB	AB	NA	6500PSI.R2	0	3	17	0	0	0	0	20	0	Diploid
2023-PLATE-105_2023-435_122-Pressure_6500PSI_R2_023	Fam1	6500 PSI	AB	AB	A	AB	AB	A	AB	A	AB	AB	AB	A	AB	AB	AB	AB	AB	AB	AB	AB	NA	6500PSI.R2	0	4	16	0	0	0	0	20	0	Diploid
2023-PLATE-105_2023-435_123-Pressure_6500PSI_R2_025	Fam1	6500 PSI	AB	AB	AB	AB	AB	A	AB	AB	AB	AB	AB	AB	AB	AB	AB	AB	AB	A	AB	AB	NA	6500PSI.R2	0	2	18	0	0	0	0	20	0	Diploid
2023-PLATE-105_2023-435_124-Pressure_6500PSI_R2_027	Fam2	6500 PSI	AB	AB	AB	A	AB	AB	AB	A	AB	AB	AB	AB	AB	AB	AB	AB	AB	A	AB	AB	NA	6500PSI.R2	0	3	17	0	0	0	0	20	0	Diploid
2023-PLATE-105_2023-435_125-Pressure_6500PSI_R2_028	Fam3	6500 PSI	AB	AB	AB	AB	AB	AB	AB	AB	AB	A	AB	A	AB	AB	AB	AB	AB	A	A	A	NA	6500PSI.R2	0	5	15	0	0	0	0	20	0	Diploid
2023-PLATE-105_2023-435_126-Pressure_6500PSI_R2_029	Fam1	6500 PSI	AB	AB	AB	AB	AB	A	AB	A	AB	AB	A	A	AB	A	AB	A	AB	AB	A	AB	NA	6500PSI.R2	0	7	13	0	0	0	0	20	0	Diploid
2023-PLATE-105_2023-435_127-Pressure_6500PSI_R2_030	Fam3	6500 PSI	AAB	ABC	ABC	ABB	ABC	A	ABB	A	AAB	AAB	ABC	ABC	AAB	A	AAB	AAB	ABC	ABB	AAB	A	NA	6500PSI.R2	0	4	0	7	3	6	16	20	1	Triploid
2023-PLATE-105_2023-435_128-Pressure_6500PSI_R2_031	Fam3	6500 PSI	ABB	ABC	ABC	ABB	ABC	A	ABC	A	AAB	AAB	ABC	AAB	AAB	A	AAB	AAB	ABC	ABB	AAB	A	NA	6500PSI.R2	0	4	0	7	3	6	16	20	1	Triploid
2023-PLATE-105_2023-435_129-Pressure_6500PSI_R2_032	Fam3	6500 PSI	AAB	ABC	ABC	ABB	ABC	AAB	ABC	A	AAB	AAB	ABC	AAB	ABC	AAB	AAB	AAB	ABC	ABB	AAB	A	NA	6500PSI.R2	0	2	0	9	2	7	18	20	1	Triploid
2023-PLATE-105_2023-435_130-Pressure_6500PSI_R2_033	Fam3	6500 PSI	AB	AB	AB	AB	ABC	A	AB	A	AB	AB	AB	A	AB	AB	AB	AB	ABC	A	AB	AB	bp shift	6500PSI.R2	0	4	14	0	0	2	2	20	0.125	Aneuploid
2023-PLATE-105_2023-435_131-Pressure_6500PSI_R2_034	Fam1	6500 PSI	AB	AB	AB	AB	A	A	AB	AB	AB	AB	A	AB	AB	AB	AB	AB	AB	NA	A	A	NA	6500PSI.R2	1	5	14	0	0	0	0	20	0	Diploid
2023-PLATE-105_2023-435_132-Pressure_6500PSI_R2_035	Fam1	6500 PSI	AB	AB	A	AB	AB	A	AB	AB	A	AB	AB	A	AB	A	AB	AB	AB	AB	AB	AB	NA	6500PSI.R2	0	5	15	0	0	0	0	20	0	Diploid
2023-PLATE-105_2023-435_133-Pressure_6500PSI_R2_036	Fam1	6500 PSI	AB	AB	AB	AB	AB	AB	AB	AB	AB	A	AB	A	AB	AB	AB	AB	AB	AB	A	A	NA	6500PSI.R2	0	4	16	0	0	0	0	20	0	Diploid
2023-PLATE-105_2023-435_134-Pressure_6500PSI_R2_037	Fam1	6500 PSI	AB	AB	A	AB	AB	AB	AB	AB	A	AB	AB	AB	A	A	AB	AB	AB	A	AB	AB	NA	6500PSI.R2	0	5	15	0	0	0	0	20	0	Diploid
2023-PLATE-105_2023-435_135-Pressure_6500PSI_R2_038	Fam2	6500 PSI	AB	AB	AB	NA	AB	A	AB	AB	AB	AB	A	AB	AB	AB	A	AB	AB	A	AB	AB	NA	6500PSI.R2	1	4	15	0	0	0	0	20	0	Diploid
2023-PLATE-105_2023-435_136-Pressure_6500PSI_R2_040	Fam1	6500 PSI	AB	AB	A	AB	AB	A	AB	A	A	AB	AB	A	AB	A	AB	AB	AB	AB	AB	AB	NA	6500PSI.R2	0	6	14	0	0	0	0	20	0	Diploid
2023-PLATE-105_2023-435_137-Pressure_6500PSI_R2_043	Fam2	6500 PSI	AB	AB	A	A	AB	AB	AB	A	AB	AB	AB	AB	AB	AB	A	AB	AB	A	AB	AB	NA	6500PSI.R2	0	5	15	0	0	0	0	20	0	Diploid
2023-PLATE-105_2023-435_138-Pressure_6500PSI_R2_044	Fam3	6500 PSI	AB	AB	AB	AB	AB	AB	AB	AB	AB	A	AB	AB	AB	AB	AB	AB	AB	A	A	A	NA	6500PSI.R2	0	4	16	0	0	0	0	20	0	Diploid
2023-PLATE-105_2023-435_139-Pressure_6500PSI_R2_045	Fam1	6500 PSI	AB	AB	A	AB	AB	A	AB	A	AB	A	AB	AB	AB	AB	AB	AB	AB	AB	A	A	NA	6500PSI.R2	0	6	14	0	0	0	0	20	0	Diploid
2023-PLATE-105_2023-435_140-Pressure_6500PSI_R2_046	Fam3	6500 PSI	AB	AB	AB	AB	AB	A	AB	A	AB	AB	AB	AB	A	A	AB	AB	AB	AB	A	A	NA	6500PSI.R2	0	6	14	0	0	0	0	20	0	Diploid
2023-PLATE-105_2023-435_141-Pressure_6500PSI_R2_047	Fam3	6500 PSI	AB	AB	AB	AB	AB	AB	AB	A	AB	AB	AB	AB	AB	A	AB	A	AB	AB	AB	AB	NA	6500PSI.R2	0	3	17	0	0	0	0	20	0	Diploid
2023-PLATE-105_2023-435_142-Pressure_6500PSI_R2_048	Fam1	6500 PSI	AB	AB	AB	AB	AB	A	AB	AB	AB	A	AB	A	AB	A	AB	A	AB	AB	A	A	NA	6500PSI.R2	0	7	13	0	0	0	0	20	0	Diploid
2023-PLATE-105_2023-435_143-Pressure_6500PSI_R2_049	Fam2	6500 PSI	AB	AB	AB	NA	AB	AB	AB	A	A	AB	AB	AB	AB	AB	A	AB	AB	AB	A	AB	NA	6500PSI.R2	1	4	15	0	0	0	0	20	0	Diploid
2023-PLATE-105_2023-435_144-Pressure_6500PSI_R2_050	Fam1	6500 PSI	AB	AB	A	AB	AB	AB	AB	A	AB	AB	AB	A	AB	AB	AB	AB	AB	AB	AB	A	NA	6500PSI.R2	0	4	16	0	0	0	0	20	0	Diploid
2023-PLATE-105_2023-435_145-Pressure_6500PSI_R2_051	Fam2	6500 PSI	AB	AB	A	A	AB	A	AB	A	AB	AB	A	AB	AB	A	AB	AB	AB	AB	A	AB	NA	6500PSI.R2	0	7	13	0	0	0	0	20	0	Diploid
2023-PLATE-105_2023-435_146-Pressure_6500PSI_R2_052	Fam1	6500 PSI	AB	AB	A	AB	AB	AB	AB	A	AB	AB	AB	AB	AB	AB	AB	A	AB	AB	AB	A	NA	6500PSI.R2	0	4	16	0	0	0	0	20	0	Diploid
2023-PLATE-105_2023-435_147-Pressure_6500PSI_R2_053	Fam1	6500 PSI	AB	AB	ABB	NA	NA	AB	AB	AB	AB	AB	NA	A	AB	NA	AB	ABB	NA	A	AB	NA	bp shift	6500PSI.R2	6	2	10	0	2	0	2	20	0.166667	Aneuploid
2023-PLATE-105_2023-435_148-Pressure_6500PSI_R2_055	Fam1	6500 PSI	AB	AB	A	AB	AB	A	AB	A	AB	AB	AB	AB	AB	A	AB	A	AB	AB	AB	A	NA	6500PSI.R2	0	6	14	0	0	0	0	20	0	Diploid
2023-PLATE-105_2023-435_149-Pressure_6500PSI_R2_056	Fam1	6500 PSI	AB	AB	AB	AB	A	A	AB	AB	A	AB	A	AB	AB	A	AB	A	AB	AB	A	A	NA	6500PSI.R2	0	8	12	0	0	0	0	20	0	Diploid
2023-PLATE-105_2023-435_150-Pressure_6500PSI_R2_057	Fam1	6500 PSI	AB	AB	AB	AB	AB	A	AB	AB	AB	AB	AB	A	AB	AB	AB	AB	AB	AB	AB	AB	NA	6500PSI.R2	0	2	18	0	0	0	0	20	0	Diploid
2023-PLATE-105_2023-435_151-Pressure_6500PSI_R2_059	Fam1	6500 PSI	AB	AB	A	AB	AB	A	AB	AB	AB	A	AB	AB	AB	AB	AB	AB	AB	A	AB	AB	NA	6500PSI.R2	0	4	16	0	0	0	0	20	0	Diploid
2023-PLATE-105_2023-435_152-Pressure_6500PSI_R2_061	Fam2	6500 PSI	AB	AB	AB	A	AB	AB	AB	AB	AB	AB	AB	AB	AB	A	AB	AB	AB	A	A	AB	bp shift	6500PSI.R2	0	4	16	0	0	0	0	20	0	Diploid
2023-PLATE-105_2023-435_153-Pressure_6500PSI_R2_062	Fam1	6500 PSI	AB	AB	A	AB	AB	A	AB	AB	AB	AB	AB	AB	AB	A	AB	AB	AB	AB	A	A	NA	6500PSI.R2	0	5	15	0	0	0	0	20	0	Diploid
2023-PLATE-105_2023-435_154-Pressure_6500PSI_R2_063	Fam2	6500 PSI	AB	AB	AB	A	AB	AB	AB	AB	AB	AB	AB	AB	AB	A	AB	AB	AB	A	AB	AB	NA	6500PSI.R2	0	3	17	0	0	0	0	20	0	Diploid
2023-PLATE-105_2023-435_155-Pressure_6500PSI_R2_064	Fam1	6500 PSI	AB	AB	AB	AB	AB	A	AB	A	AB	AB	AB	AB	AB	AB	AB	AB	AB	A	A	A	NA	6500PSI.R2	0	5	15	0	0	0	0	20	0	Diploid
2023-PLATE-105_2023-435_156-Pressure_6500PSI_R2_066	Fam1	6500 PSI	AB	AB	AB	AB	AB	A	AB	A	NA	AB	AB	AB	AB	A	NA	AB	AB	NA	AB	AB	NA	6500PSI.R2	3	3	14	0	0	0	0	20	0	Diploid
2023-PLATE-105_2023-435_158-Pressure_6500PSI_R2_069	Fam1	6500 PSI	AB	AB	AB	AB	AB	A	AB	AB	AB	A	AB	AB	AB	AB	AB	AB	AB	AB	A	AB	NA	6500PSI.R2	0	3	17	0	0	0	0	20	0	Diploid
2023-PLATE-105_2023-435_159-Pressure_6500PSI_R2_070	Fam1	6500 PSI	NA	AB	NA	AAB	AB	AB	AB	ABB	AB	A	NA	A	AB	NA	AAB	NA	NA	A	AAB	AAB	NA	6500PSI.R2	6	3	6	4	1	0	5	20	0.454545	Aneuploid
2023-PLATE-105_2023-435_160-Pressure_6500PSI_R2_071	Fam2	6500 PSI	AB	AB	AB	NA	AB	A	AB	A	A	AB	AB	AB	A	AB	AB	AB	AB	A	A	AB	NA	6500PSI.R2	1	6	13	0	0	0	0	20	0	Diploid
2023-PLATE-105_2023-435_161-Pressure_6500PSI_R2_072	Fam3	6500 PSI	AB	AB	AB	AB	AB	AB	AB	A	AB	AB	AB	A	AB	A	AB	A	AB	AB	A	AB	NA	6500PSI.R2	0	5	15	0	0	0	0	20	0	Diploid
2023-PLATE-105_2023-435_162-Pressure_6500PSI_R2_074	Fam2	6500 PSI	AB	NA	A	A	AB	AB	AB	AB	AB	AB	AB	AB	AB	AB	A	AB	AB	AB	A	AB	NA	6500PSI.R2	1	4	15	0	0	0	0	20	0	Diploid
2023-PLATE-105_2023-435_163-Pressure_6500PSI_R2_075	Fam2	6500 PSI	AAB	AB	A	NA	AB	AB	AB	A	AB	AB	A	AB	AB	A	AB	AB	AB	AB	A	AB	NA	6500PSI.R2	1	5	13	1	0	0	1	20	0.0714286	Aneuploid
2023-PLATE-105_2023-435_164-Pressure_6500PSI_R2_078	Fam1	6500 PSI	AB	AB	AB	AB	A	AB	AB	AB	AB	AB	A	AB	AB	AB	AB	AB	AB	AB	A	AB	NA	6500PSI.R2	0	3	17	0	0	0	0	20	0	Diploid
2023-PLATE-105_2023-435_165-Pressure_6500PSI_R2_079	Fam1	6500 PSI	AB	AB	AB	AB	AB	AB	AB	AB	AB	AB	AB	A	A	A	AB	A	AB	AB	AB	A	NA	6500PSI.R2	0	5	15	0	0	0	0	20	0	Diploid
2023-PLATE-105_2023-435_166-Pressure_6500PSI_R2_080	Fam3	6500 PSI	AAB	ABC	ABC	ABB	ABB	A	ABC	ABB	ABC	A	ABC	AAB	AAB	AAB	AAB	AAB	ABC	AAB	ABB	A	NA	6500PSI.R2	0	3	0	7	4	6	17	20	1	Triploid
2023-PLATE-105_2023-435_167-Pressure_6500PSI_R2_081	Fam1	6500 PSI	AB	AB	AB	AB	AB	A	AB	AB	A	AB	AB	A	AB	A	AB	A	AB	AB	AB	A	NA	6500PSI.R2	0	6	14	0	0	0	0	20	0	Diploid
2023-PLATE-105_2023-435_168-Pressure_6500PSI_R2_082	Fam1	6500 PSI	AB	AB	A	AB	AB	A	AB	AB	AB	AB	AB	A	AB	A	AB	AB	AB	A	A	AB	bp shift	6500PSI.R2	0	6	14	0	0	0	0	20	0	Diploid
2023-PLATE-105_2023-435_169-Pressure_6500PSI_R2_083	Fam1	6500 PSI	AB	AB	AB	AB	AB	A	AB	AB	AB	A	AB	A	AB	AB	AB	A	AB	AB	A	A	NA	6500PSI.R2	0	6	14	0	0	0	0	20	0	Diploid
2023-PLATE-105_2023-435_170-Pressure_6500PSI_R2_085	Fam1	6500 PSI	AB	AB	AB	AB	A	A	AB	AB	A	AB	AB	AB	AB	AB	AB	AB	AB	AB	AB	AB	NA	6500PSI.R2	0	3	17	0	0	0	0	20	0	Diploid
2023-PLATE-105_2023-435_171-Pressure_6500PSI_R2_086	Fam3	6500 PSI	ABB	ABC	AAB	ABB	ABC	A	ABC	ABB	ABC	A	ABC	AAB	AAB	A	AAB	AAB	ABC	ABB	AAB	A	NA	6500PSI.R2	0	4	0	6	4	6	16	20	1	Triploid
2023-PLATE-105_2023-435_172-Pressure_6500PSI_R2_087	Fam3	6500 PSI	ABB	ABC	ABC	ABB	ABC	A	ABC	A	ABC	A	ABC	ABC	A	A	AAB	AAB	ABC	ABB	AAB	AAB	bp shift	6500PSI.R2	0	5	0	4	3	8	15	20	1	Triploid
2023-PLATE-105_2023-435_173-Pressure_6500PSI_R2_088	Fam1	6500 PSI	AB	AB	A	AB	AB	AB	AB	A	A	AB	AB	AB	A	AB	AB	AB	AB	AB	A	AB	NA	6500PSI.R2	0	5	15	0	0	0	0	20	0	Diploid
2023-PLATE-105_2023-435_174-Pressure_6500PSI_R2_093	Fam3	6500 PSI	ABB	ABC	ABC	ABB	ABC	A	ABC	ABB	ABB	A	ABC	ABC	AAB	AAB	AAB	A	ABC	AAB	A	AAB	NA	6500PSI.R2	0	4	0	5	4	7	16	20	1	Triploid
2023-PLATE-105_2023-435_175-Pressure_6500PSI_R2_095	Fam1	6500 PSI	AB	AB	AB	AB	AB	A	AB	AB	AB	AB	AB	AB	AB	A	AB	AB	AB	AB	AB	A	NA	6500PSI.R2	0	3	17	0	0	0	0	20	0	Diploid
2023-PLATE-105_2023-435_176-Pressure_6500PSI_R2_097	Fam1	6500 PSI	AB	AB	A	AB	AB	AB	AB	AB	A	AB	AB	AB	A	A	AB	AB	AB	AB	A	A	NA	6500PSI.R2	0	6	14	0	0	0	0	20	0	Diploid
2023-PLATE-105_2023-435_178-Pressure_6500PSI_R2_103	Fam2	6500 PSI	AB	AB	AB	A	AB	AB	AB	AB	A	AB	AB	A	AB	AB	AB	AB	AB	AB	A	AB	NA	6500PSI.R2	0	4	16	0	0	0	0	20	0	Diploid
2023-PLATE-105_2023-435_179-Pressure_6500PSI_R2_106	Fam2	6500 PSI	AB	AB	AB	A	AB	AB	AB	A	AB	A	A	AB	AB	A	AB	AB	AB	A	A	AB	NA	6500PSI.R2	0	7	13	0	0	0	0	20	0	Diploid
2023-PLATE-105_2023-435_180-Pressure_6500PSI_R2_107	Fam1	6500 PSI	AB	AB	AB	AB	AB	AB	AB	AB	A	AB	AB	A	A	A	AB	A	AB	AB	AB	AB	NA	6500PSI.R2	0	5	15	0	0	0	0	20	0	Diploid
2023-PLATE-105_2023-435_181-Pressure_6500PSI_R2_108	Fam2	6500 PSI	AB	AB	AB	NA	AB	AB	AB	AB	AB	AB	AB	A	AB	A	A	AB	AB	AB	A	A	NA	6500PSI.R2	1	5	14	0	0	0	0	20	0	Diploid
2023-PLATE-105_2023-435_182-Pressure_6500PSI_R2_109	Fam2	6500 PSI	AB	AB	A	NA	AB	AB	AAB	A	AB	AB	AB	AB	AB	A	A	AB	AB	AB	AB	A	NA	6500PSI.R2	1	5	13	1	0	0	1	20	0.0714286	Aneuploid
2023-PLATE-105_2023-435_183-Pressure_6500PSI_R2_111	Fam3	6500 PSI	AAB	ABC	ABC	ABB	ABC	AAB	ABC	A	ABC	AAB	ABC	AAB	ABC	AAB	AAB	A	ABC	ABC	AAB	A	NA	6500PSI.R2	0	3	0	7	1	9	17	20	1	Triploid
2023-PLATE-105_2023-435_184-Pressure_6500PSI_R2_112	Fam1	6500 PSI	AB	AB	AB	AB	AB	AB	AB	AB	AB	A	AB	A	AB	A	AB	AB	AB	A	A	A	NA	6500PSI.R2	0	6	14	0	0	0	0	20	0	Diploid
2023-PLATE-105_2023-435_185-Pressure_6500PSI_R2_113	Fam2	6500 PSI	AB	AB	AB	A	AB	AB	AB	A	AB	AB	AB	A	AB	AB	A	AB	AB	A	AB	AB	NA	6500PSI.R2	0	5	15	0	0	0	0	20	0	Diploid
2023-PLATE-105_2023-435_186-Pressure_6500PSI_R2_114	Fam2	6500 PSI	AB	AB	A	NA	AB	AB	AB	AAB	AB	A	AB	AB	AB	A	AB	AB	AB	A	A	AB	NA	6500PSI.R2	1	5	13	1	0	0	1	20	0.0714286	Aneuploid
2023-PLATE-105_2023-435_187-Pressure_6500PSI_R2_119	Fam1	6500 PSI	AB	AB	A	AB	AB	AB	AB	A	AB	A	AB	A	AB	AB	AB	AB	AB	A	AB	A	NA	6500PSI.R2	0	6	14	0	0	0	0	20	0	Diploid
2023-PLATE-105_2023-435_94-Pressure_6500PSI_R1_130	Fam3	6500 PSI	AAB	ABC	ABC	ABB	ABB	A	ABC	ABB	ABC	AAB	ABC	ABC	A	AAB	AAB	A	ABB	ABC	ABB	A	NA	6500PSI.R1	0	4	0	4	5	7	16	20	1	Triploid
2023-PLATE-105_2023-435_95-Pressure_6500PSI_R1_131	Fam1	6500 PSI	AB	AB	AB	AB	AB	AB	AB	AB	AB	AB	A	A	AB	A	AB	AB	AB	AB	A	AB	NA	6500PSI.R1	0	4	16	0	0	0	0	20	0	Diploid
2023-PLATE-105_2023-435_96-Pressure_6500PSI_R1_132	Fam1	6500 PSI	AB	AB	AB	AB	A	A	AB	AB	AB	AB	AB	AB	AB	A	AB	AB	AB	AB	AB	A	NA	6500PSI.R1	0	4	16	0	0	0	0	20	0	Diploid
2023-PLATE-105_2023-435_97-Pressure_6500PSI_R1_133	Fam1	6500 PSI	AB	AB	A	AB	AB	AB	AB	A	AB	AB	AB	A	AB	A	AB	A	AB	AB	AB	A	NA	6500PSI.R1	0	6	14	0	0	0	0	20	0	Diploid
2023-PLATE-105_2023-435_98-Pressure_6500PSI_R1_134	Fam3	6500 PSI	AAB	ABC	ABC	ABB	ABC	AAB	ABC	ABB	AAB	AAB	AAB	AAB	ABC	A	AAB	AAB	ABC	ABB	AAB	AAB	NA	6500PSI.R1	0	1	0	10	3	6	19	20	1	Triploid
2023-PLATE-105_2023-435_99-Pressure_6500PSI_R1_136	Fam3	6500 PSI	ABB	ABC	ABC	NA	ABC	AAB	ABC	A	ABB	A	ABC	AAB	ABC	A	AAB	AAB	ABC	AAB	AAB	AAB	NA	6500PSI.R1	1	3	0	7	2	7	16	20	1	Triploid
2023-PLATE-106_2022-2353_10-Pressure_7500PSI_R1_010	Fam1	7500 PSI	AB	AB	A	AB	AB	AB	AB	AB	AB	AB	A	AB	AB	AB	AB	A	AB	A	AB	A	NA	7500PSI.R1	0	5	15	0	0	0	0	20	0	Diploid
2023-PLATE-106_2022-2353_11-Pressure_7500PSI_R1_011	Fam3	7500 PSI	ABB	ABC	ABC	ABB	ABC	AAB	ABC	A	AAB	A	ABC	AAB	ABC	AAB	AAB	A	ABC	ABC	AAB	AAB	bp shift	7500PSI.R1	0	3	0	7	2	8	17	20	1	Triploid
2023-PLATE-106_2022-2353_12-Pressure_7500PSI_R1_012	Fam3	7500 PSI	AAB	ABC	ABC	ABB	ABC	A	ABC	ABB	ABC	A	ABC	ABC	AAB	A	A	AAB	ABC	ABB	A	A	bp shift	7500PSI.R1	0	6	0	3	3	8	14	20	1	Triploid
2023-PLATE-106_2022-2353_13-Pressure_7500PSI_R1_013	Fam3	7500 PSI	AAB	ABC	ABC	ABB	ABC	AAB	ABC	A	ABC	A	ABC	AAB	ABC	A	AAB	AAB	ABC	AAB	A	A	NA	7500PSI.R1	0	5	0	6	1	8	15	20	1	Triploid
2023-PLATE-106_2022-2353_14-Pressure_7500PSI_R1_014	Fam3	7500 PSI	AAB	ABC	ABC	ABB	ABC	A	ABC	ABB	ABC	AAB	ABC	ABC	AAB	AAB	AAB	AAB	ABC	ABB	AAB	A	NA	7500PSI.R1	0	2	0	7	3	8	18	20	1	Triploid
2023-PLATE-106_2022-2353_15-Pressure_7500PSI_R1_015	Fam2	7500 PSI	ABB	ABC	ABB	A	ABC	AAB	ABC	AAB	AAB	ABC	ABC	ABB	ABC	AAB	ABB	AAB	ABC	A	ABB	ABB	NA	7500PSI.R1	0	2	0	5	6	7	18	20	1	Triploid
2023-PLATE-106_2022-2353_16-Pressure_7500PSI_R1_016	Fam2	7500 PSI	AAB	ABC	AAB	A	ABC	A	ABC	ABB	AAB	ABB	ABB	ABC	AAB	A	ABB	AAB	ABC	ABB	AAB	ABB	NA	7500PSI.R1	0	3	0	6	6	5	17	20	1	Triploid
2023-PLATE-106_2022-2353_17-Pressure_7500PSI_R1_017	Fam3	7500 PSI	ABB	AAB	ABC	ABB	ABC	AAB	ABC	ABB	AAB	A	ABC	ABC	ABC	A	AAB	AAB	ABC	ABB	AAB	AAB	NA	7500PSI.R1	0	2	0	7	4	7	18	20	1	Triploid
2023-PLATE-106_2022-2353_18-Pressure_7500PSI_R1_018	Fam3	7500 PSI	ABB	ABC	ABC	ABB	ABC	AAB	ABC	ABB	ABC	AAB	ABC	AAB	ABB	A	AAB	A	ABC	ABC	ABB	A	NA	7500PSI.R1	0	3	0	4	5	8	17	20	1	Triploid
2023-PLATE-106_2022-2353_19-Pressure_7500PSI_R1_019	Fam2	7500 PSI	AB	AB	AB	A	AB	AB	AB	A	AB	A	AB	AB	AB	AB	A	AB	AB	AB	AB	AB	NA	7500PSI.R1	0	4	16	0	0	0	0	20	0	Diploid
2023-PLATE-106_2022-2353_1-Pressure_7500PSI_R1_001	Fam1	7500 PSI	AAB	ABC	A	ABC	ABC	A	ABB	A	ABC	AAB	ABC	A	ABC	AAB	ABC	ABC	ABB	ABC	AAB	AAB	NA	7500PSI.R1	0	4	0	5	2	9	16	20	1	Triploid
2023-PLATE-106_2022-2353_20-Pressure_7500PSI_R1_020	Fam3	7500 PSI	AAB	ABC	ABC	ABB	ABC	AAB	ABC	A	ABC	A	ABC	AAB	ABC	AAB	AAB	AAB	ABC	ABB	AAB	A	NA	7500PSI.R1	0	3	0	7	2	8	17	20	1	Triploid
2023-PLATE-106_2022-2353_21-Pressure_7500PSI_R1_021	Fam1	7500 PSI	ABC	ABC	A	ABC	ABB	AAB	ABB	A	ABC	AAB	ABC	A	AAB	A	ABC	ABC	ABB	ABC	ABB	AAB	NA	7500PSI.R1	0	4	0	4	4	8	16	20	1	Triploid
2023-PLATE-106_2022-2353_22-Pressure_7500PSI_R1_022	Fam3	7500 PSI	ABB	ABC	ABC	ABB	ABC	A	ABC	ABB	ABC	A	ABC	AAB	AAB	AAB	AAB	A	ABC	ABC	ABB	AAB	NA	7500PSI.R1	0	3	0	5	4	8	17	20	1	Triploid
2023-PLATE-106_2022-2353_23-Pressure_7500PSI_R1_023	Fam2	7500 PSI	AAB	ABC	ABC	NA	ABC	A	ABC	AAB	A	ABB	ABC	ABC	AAB	A	ABB	AAB	ABC	ABB	AAB	AAB	NA	7500PSI.R1	1	3	0	6	3	7	16	20	1	Triploid
2023-PLATE-106_2022-2353_24-Pressure_7500PSI_R1_024	Fam3	7500 PSI	AAB	ABC	ABC	ABB	ABC	A	ABC	ABB	ABC	A	ABC	ABC	AAB	AAB	AAB	AAB	ABC	ABB	AAB	AAB	NA	7500PSI.R1	0	2	0	7	3	8	18	20	1	Triploid
2023-PLATE-106_2022-2353_25-Pressure_7500PSI_R1_025	Fam3	7500 PSI	ABB	ABC	ABC	ABB	ABC	A	ABC	A	ABC	A	ABC	ABC	AAB	A	AAB	AAB	ABC	AAB	ABB	A	NA	7500PSI.R1	0	5	0	4	3	8	15	20	1	Triploid
2023-PLATE-106_2022-2353_26-Pressure_7500PSI_R1_026	Fam3	7500 PSI	AAB	ABC	ABC	ABB	ABC	AAB	AAB	A	AAB	AAB	ABC	ABC	ABC	A	AAB	A	ABC	ABC	AAB	AAB	NA	7500PSI.R1	0	3	0	8	1	8	17	20	1	Triploid
2023-PLATE-106_2022-2353_27-Pressure_7500PSI_R1_027	Fam3	7500 PSI	ABB	ABC	ABC	ABB	ABC	AAB	ABC	A	ABC	AAB	ABC	ABC	ABC	AAB	AAB	AAB	ABC	ABB	AAB	A	NA	7500PSI.R1	0	2	0	6	3	9	18	20	1	Triploid
2023-PLATE-106_2022-2353_28-Pressure_7500PSI_R1_028	Fam3	7500 PSI	AAB	ABC	ABC	ABB	ABC	AAB	ABC	ABB	ABB	A	ABB	AAB	ABC	AAB	AAB	A	ABC	ABC	ABB	AAB	NA	7500PSI.R1	0	2	0	6	5	7	18	20	1	Triploid
2023-PLATE-106_2022-2353_29-Pressure_7500PSI_R1_029	Fam1	7500 PSI	AB	AB	A	AB	A	A	AB	AB	AB	A	AB	AAB	AB	AB	AB	A	AB	AB	A	A	NA	7500PSI.R1	0	7	12	1	0	0	1	20	0.0769231	Aneuploid
2023-PLATE-106_2022-2353_2-Pressure_7500PSI_R1_002	Fam3	7500 PSI	AAB	ABC	ABC	ABB	ABC	AAB	ABC	ABB	ABB	A	ABC	AAB	ABB	A	AAB	A	ABC	ABC	AAB	A	NA	7500PSI.R1	0	4	0	5	4	7	16	20	1	Triploid
2023-PLATE-106_2022-2353_30-Pressure_7500PSI_R1_030	Fam3	7500 PSI	AAB	ABC	ABC	ABB	ABC	A	ABC	ABB	ABC	AAB	ABC	ABC	AAB	A	AAB	AAB	ABC	AAB	AAB	A	NA	7500PSI.R1	0	3	0	7	2	8	17	20	1	Triploid
2023-PLATE-106_2022-2353_31-Pressure_7500PSI_R1_031	Fam3	7500 PSI	ABB	ABC	ABC	ABB	ABC	AAB	ABC	A	ABC	A	ABC	AAB	ABB	A	AAB	AAB	ABC	ABB	AAB	A	NA	7500PSI.R1	0	4	0	5	4	7	16	20	1	Triploid
2023-PLATE-106_2022-2353_32-Pressure_7500PSI_R1_032	Fam3	7500 PSI	AAB	ABC	ABC	ABB	ABC	A	ABC	ABB	ABC	AAB	ABC	AAB	AAB	A	AAB	AAB	ABC	ABB	AAB	AAB	NA	7500PSI.R1	0	2	0	8	3	7	18	20	1	Triploid
2023-PLATE-106_2022-2353_33-Pressure_7500PSI_R1_033	Fam1	7500 PSI	AB	AB	A	AB	AB	AB	AB	AB	AB	AB	AB	AB	AB	A	AB	AB	AB	AB	AB	AB	NA	7500PSI.R1	0	2	18	0	0	0	0	20	0	Diploid
2023-PLATE-106_2022-2353_34-Pressure_7500PSI_R1_034	Fam2	7500 PSI	AAB	ABC	ABB	A	ABC	AAB	ABC	ABB	ABB	AAB	ABC	ABB	ABC	AAB	A	AAB	ABC	ABB	AAB	AAB	NA	7500PSI.R1	0	2	0	7	5	6	18	20	1	Triploid
2023-PLATE-106_2022-2353_35-Pressure_7500PSI_R1_035	Fam3	7500 PSI	AAB	ABC	ABC	ABB	ABC	A	AAB	A	ABC	AAB	ABC	AAB	AAB	AAB	AAB	AAB	ABC	AAB	AAB	AAB	NA	7500PSI.R1	0	2	0	11	1	6	18	20	1	Triploid
2023-PLATE-106_2022-2353_36-Pressure_7500PSI_R1_036	Fam1	7500 PSI	AB	ABC	AB	AB	AB	AB	AB	AB	AB	A	AB	A	A	A	AB	AB	AB	AB	AB	AB	NA	7500PSI.R1	0	4	15	0	0	1	1	20	0.0625	Aneuploid
2023-PLATE-106_2022-2353_37-Pressure_7500PSI_R1_037	Fam3	7500 PSI	ABB	ABC	ABC	ABB	ABC	A	ABC	ABB	ABC	AAB	ABC	AAB	AAB	A	AAB	A	ABC	ABC	AAB	AAB	NA	7500PSI.R1	0	3	0	6	3	8	17	20	1	Triploid
2023-PLATE-106_2022-2353_38-Pressure_7500PSI_R1_038	Fam2	7500 PSI	AAB	ABC	ABB	A	ABB	A	ABC	ABB	ABC	A	ABB	ABB	ABB	AB	ABB	AAB	ABC	A	AAB	ABB	NA	7500PSI.R1	0	4	1	3	8	4	15	20	0.9375	Aneuploid
2023-PLATE-106_2022-2353_39-Pressure_7500PSI_R1_039	Fam3	7500 PSI	ABB	ABC	ABC	ABB	ABC	AAB	ABC	A	ABC	A	ABC	AAB	ABC	AAB	AAB	A	ABC	ABC	AAB	AAB	NA	7500PSI.R1	0	3	0	6	2	9	17	20	1	Triploid
2023-PLATE-106_2022-2353_3-Pressure_7500PSI_R1_003	Fam2	7500 PSI	ABB	ABC	ABB	NA	AAB	A	ABC	AAB	AAB	ABC	ABC	ABC	AAB	A	AAB	AAB	ABC	ABB	AAB	ABB	NA	7500PSI.R1	1	2	0	7	4	6	17	20	1	Triploid
2023-PLATE-106_2022-2353_40-Pressure_7500PSI_R1_040	Fam3	7500 PSI	AAB	ABC	ABC	ABB	ABC	A	ABC	A	ABC	A	ABC	ABC	AAB	AAB	AAB	AAB	ABC	ABB	AAB	AAB	NA	7500PSI.R1	0	3	0	7	2	8	17	20	1	Triploid
2023-PLATE-106_2022-2353_41-Pressure_7500PSI_R1_041	Fam3	7500 PSI	ABB	ABC	ABC	ABB	ABC	A	ABC	ABB	ABC	AAB	ABC	AAB	AAB	A	AAB	A	ABC	ABC	AAB	A	NA	7500PSI.R1	0	4	0	5	3	8	16	20	1	Triploid
2023-PLATE-106_2022-2353_42-Pressure_7500PSI_R1_042	Fam3	7500 PSI	ABB	ABB	ABC	ABB	ABC	A	ABC	ABB	ABB	A	ABC	ABC	A	AAB	AAB	A	ABC	ABC	ABB	AAB	NA	7500PSI.R1	0	4	0	3	6	7	16	20	1	Triploid
2023-PLATE-106_2022-2353_43-Pressure_7500PSI_R1_043	Fam3	7500 PSI	ABB	ABC	ABC	ABB	ABC	A	ABC	A	ABC	AAB	ABC	ABC	AAB	A	AAB	AAB	ABC	ABB	AAB	A	NA	7500PSI.R1	0	4	0	5	3	8	16	20	1	Triploid
2023-PLATE-106_2022-2353_44-Pressure_7500PSI_R1_044	Fam3	7500 PSI	AAB	ABC	ABC	ABB	ABC	AAB	ABC	A	ABC	A	ABC	ABC	ABC	AAB	AAB	AAB	ABC	ABB	AAB	A	NA	7500PSI.R1	0	3	0	6	2	9	17	20	1	Triploid
2023-PLATE-106_2022-2353_45-Pressure_7500PSI_R1_045	Fam3	7500 PSI	AAB	ABC	AAB	ABB	ABC	A	ABB	ABB	ABC	AAB	ABC	ABC	AAB	A	AAB	AAB	ABC	A	ABB	AAB	NA	7500PSI.R1	0	3	0	7	4	6	17	20	1	Triploid
2023-PLATE-106_2022-2353_46-Pressure_7500PSI_R1_046	Fam1	7500 PSI	AB	AB	A	AB	AB	AB	AB	AB	AB	A	AB	A	A	AB	AB	A	AB	AB	AB	A	NA	7500PSI.R1	0	6	14	0	0	0	0	20	0	Diploid
2023-PLATE-106_2022-2353_47-Pressure_7500PSI_R1_047	Fam1	7500 PSI	AB	AB	ABB	AB	A	A	AB	A	AB	AB	A	AB	AB	A	AB	AB	AB	AB	A	A	NA	7500PSI.R1	0	7	12	0	1	0	1	20	0.0769231	Aneuploid
2023-PLATE-106_2022-2353_48-Pressure_7500PSI_R1_048	Fam3	7500 PSI	ABB	ABC	ABC	ABB	ABC	AAB	ABC	ABB	ABC	A	ABC	ABC	ABB	A	AAB	AAB	ABC	AAB	A	A	NA	7500PSI.R1	0	4	0	4	4	8	16	20	1	Triploid
2023-PLATE-106_2022-2353_49-Pressure_7500PSI_R1_049	Fam3	7500 PSI	ABB	ABC	ABC	ABB	ABC	A	AAB	ABB	ABB	A	ABC	ABC	AAB	AAB	AAB	A	ABC	AAB	AAB	A	NA	7500PSI.R1	0	4	0	6	4	6	16	20	1	Triploid
2023-PLATE-106_2022-2353_4-Pressure_7500PSI_R1_004	Fam3	7500 PSI	AAB	ABC	ABC	ABB	ABC	AAB	ABC	A	ABC	A	ABC	ABC	ABC	A	AAB	A	ABC	ABC	ABB	AAB	NA	7500PSI.R1	0	4	0	4	2	10	16	20	1	Triploid
2023-PLATE-106_2022-2353_50-Pressure_7500PSI_R1_050	Fam3	7500 PSI	ABB	ABC	ABC	ABB	ABC	A	ABB	ABB	ABC	A	ABC	ABC	ABB	AAB	AAB	A	ABC	AAB	AAB	AAB	NA	7500PSI.R1	0	3	0	5	5	7	17	20	1	Triploid
2023-PLATE-106_2022-2353_51-Pressure_7500PSI_R1_051	Fam3	7500 PSI	ABB	ABC	ABC	ABB	ABC	AAB	ABC	ABB	ABB	A	ABC	ABC	ABC	A	AAB	A	ABC	ABC	AAB	AAB	NA	7500PSI.R1	0	3	0	4	4	9	17	20	1	Triploid
2023-PLATE-106_2022-2353_52-Pressure_7500PSI_R1_052	Fam3	7500 PSI	AAB	ABC	AAB	ABB	ABC	A	ABC	ABB	ABB	AAB	ABC	AAB	AAB	A	AAB	A	ABC	ABC	AAB	A	NA	7500PSI.R1	0	4	0	7	3	6	16	20	1	Triploid
2023-PLATE-106_2022-2353_53-Pressure_7500PSI_R1_053	Fam1	7500 PSI	AB	AB	A	AB	A	A	AB	AB	A	AB	AB	A	AB	AB	AB	AB	AB	AB	AB	AB	NA	7500PSI.R1	0	5	15	0	0	0	0	20	0	Diploid
2023-PLATE-106_2022-2353_54-Pressure_7500PSI_R1_054	Fam2	7500 PSI	ABB	ABC	ABB	A	AAB	A	ABC	AAB	AAB	NA	ABC	ABC	NA	ABB	ABB	NA	NA	A	NA	AAB	NA	7500PSI.R1	5	3	0	4	4	4	12	20	1	Triploid
2023-PLATE-106_2022-2353_55-Pressure_7500PSI_R1_055	Fam2	7500 PSI	ABB	ABC	A	NA	ABC	A	ABC	AAB	ABC	ABC	ABB	ABC	AAB	A	A	AAB	ABC	A	ABB	ABB	NA	7500PSI.R1	1	5	0	3	4	7	14	20	1	Triploid
2023-PLATE-106_2022-2353_56-Pressure_7500PSI_R1_056	Fam3	7500 PSI	AAB	ABC	ABC	ABB	ABC	A	ABC	ABB	ABC	AAB	ABC	AAB	AAB	A	AAB	A	ABC	ABC	AAB	A	NA	7500PSI.R1	0	4	0	6	2	8	16	20	1	Triploid
2023-PLATE-106_2022-2353_57-Pressure_7500PSI_R1_057	Fam2	7500 PSI	ABB	ABC	ABB	NA	ABC	AAB	ABC	AAB	ABC	ABB	ABB	ABB	ABC	A	AAB	AAB	ABC	A	ABB	AAB	NA	7500PSI.R1	1	2	0	5	6	6	17	20	1	Triploid
2023-PLATE-106_2022-2353_58-Pressure_7500PSI_R1_058	Fam3	7500 PSI	ABB	ABC	ABC	ABB	ABC	A	ABC	ABB	ABC	AAB	ABC	ABC	AAB	A	AAB	AAB	ABC	ABB	AAB	AAB	NA	7500PSI.R1	0	2	0	6	4	8	18	20	1	Triploid
2023-PLATE-106_2022-2353_59-Pressure_7500PSI_R1_059	Fam3	7500 PSI	AAB	ABC	ABC	ABB	AAB	A	ABC	A	ABB	A	ABC	ABC	A	A	AAB	AAB	ABC	ABB	A	AAB	NA	7500PSI.R1	0	6	0	5	3	6	14	20	1	Triploid
2023-PLATE-106_2022-2353_5-Pressure_7500PSI_R1_005	Fam3	7500 PSI	ABB	ABC	ABC	ABB	ABC	AAB	ABC	ABB	ABC	A	ABC	AAB	ABB	A	AAB	AAB	ABC	ABB	ABB	A	NA	7500PSI.R1	0	3	0	4	6	7	17	20	1	Triploid
2023-PLATE-106_2022-2353_60-Pressure_7500PSI_R1_060	Fam3	7500 PSI	ABB	ABC	ABC	ABB	ABC	AAB	ABC	ABB	ABC	A	ABC	AAB	ABC	AAB	AAB	A	ABC	ABC	AAB	A	NA	7500PSI.R1	0	3	0	5	3	9	17	20	1	Triploid
2023-PLATE-106_2022-2353_61-Pressure_7500PSI_R1_061	Fam3	7500 PSI	AAB	ABC	ABC	ABB	ABC	AAB	ABC	ABB	ABC	A	ABC	ABC	ABC	AAB	AAB	AAB	ABC	ABB	AAB	AAB	NA	7500PSI.R1	0	1	0	7	3	9	19	20	1	Triploid
2023-PLATE-106_2022-2353_62-Pressure_7500PSI_R1_062	Fam3	7500 PSI	AAB	ABC	ABC	ABB	ABC	A	ABC	ABB	ABC	A	ABC	ABC	AAB	AAB	AAB	AAB	ABC	ABB	AAB	AAB	NA	7500PSI.R1	0	2	0	7	3	8	18	20	1	Triploid
2023-PLATE-106_2022-2353_63-Pressure_7500PSI_R1_063	Fam1	7500 PSI	AB	AB	AB	AB	A	A	AB	AB	A	AB	AB	A	AB	A	AB	AB	AB	AB	AB	AB	NA	7500PSI.R1	0	5	15	0	0	0	0	20	0	Diploid
2023-PLATE-106_2022-2353_64-Pressure_7500PSI_R1_064	Fam3	7500 PSI	ABB	ABC	ABC	ABB	ABC	A	ABC	A	ABB	NA	ABC	AAB	NA	AAB	AAB	NA	NA	ABC	NA	A	NA	7500PSI.R1	5	3	0	3	3	6	12	20	1	Triploid
2023-PLATE-106_2022-2353_65-Pressure_7500PSI_R1_065	Fam3	7500 PSI	ABB	ABC	ABC	ABB	ABC	AAB	ABC	A	ABC	AAB	ABC	AAB	ABC	A	AAB	A	ABC	AAB	AAB	A	NA	7500PSI.R1	0	4	0	6	2	8	16	20	1	Triploid
2023-PLATE-106_2022-2353_66-Pressure_7500PSI_R1_066	Fam3	7500 PSI	ABB	ABC	ABC	ABB	ABC	A	ABB	A	ABC	A	ABC	ABC	AAB	A	AAB	AAB	ABC	ABB	A	A	NA	7500PSI.R1	0	6	0	3	4	7	14	20	1	Triploid
2023-PLATE-106_2022-2353_67-Pressure_7500PSI_R1_067	Fam3	7500 PSI	AAB	ABC	ABC	ABB	ABC	AAB	ABC	ABB	ABC	AAB	ABC	ABC	ABB	A	AAB	AAB	ABC	ABB	ABB	A	NA	7500PSI.R1	0	2	0	5	5	8	18	20	1	Triploid
2023-PLATE-106_2022-2353_68-Pressure_7500PSI_R1_068	Fam3	7500 PSI	ABB	ABB	ABC	ABB	ABC	A	ABC	ABB	ABC	AAB	ABC	ABC	ABB	A	AAB	A	ABC	ABC	A	A	NA	7500PSI.R1	0	5	0	2	5	8	15	20	1	Triploid
2023-PLATE-106_2022-2353_69-Pressure_7500PSI_R1_069	Fam2	7500 PSI	ABB	ABC	ABB	A	ABC	AAB	ABC	AAB	ABB	ABB	ABC	ABB	ABC	AAB	AAB	AAB	ABC	A	A	A	NA	7500PSI.R1	0	4	0	5	5	6	16	20	1	Triploid
2023-PLATE-106_2022-2353_6-Pressure_7500PSI_R1_006	Fam3	7500 PSI	AAB	ABC	ABC	ABB	ABC	AAB	ABB	A	AAB	AAB	ABC	AAB	ABB	AAB	AAB	A	ABC	ABC	AAB	A	NA	7500PSI.R1	0	3	0	8	3	6	17	20	1	Triploid
2023-PLATE-106_2022-2353_70-Pressure_7500PSI_R1_070	Fam2	7500 PSI	ABB	ABC	ABB	NA	AAB	A	ABC	AAB	AAB	ABC	ABC	ABB	AAB	ABB	ABB	AAB	ABC	ABB	AAB	ABB	NA	7500PSI.R1	1	1	0	6	7	5	18	20	1	Triploid
2023-PLATE-106_2022-2353_71-Pressure_7500PSI_R1_071	Fam3	7500 PSI	AAB	ABC	ABC	NA	ABC	A	ABC	A	ABB	A	ABC	AAB	AAB	A	AAB	A	ABC	ABC	A	A	NA	7500PSI.R1	1	7	0	4	1	7	12	20	1	Triploid
2023-PLATE-106_2022-2353_72-Pressure_7500PSI_R1_072	Fam3	7500 PSI	ABB	ABC	ABC	ABB	ABC	AAB	AAB	A	ABC	A	ABC	AAB	ABC	AAB	AAB	A	ABC	ABC	A	AAB	NA	7500PSI.R1	0	4	0	6	2	8	16	20	1	Triploid
2023-PLATE-106_2022-2353_73-Pressure_7500PSI_R1_073	Fam3	7500 PSI	AAB	ABC	ABC	ABB	ABC	A	ABB	ABB	ABC	AAB	ABC	ABB	AAB	AAB	AAB	AAB	ABC	ABB	AAB	A	NA	7500PSI.R1	0	2	0	7	5	6	18	20	1	Triploid
2023-PLATE-106_2022-2353_74-Pressure_7500PSI_R1_074	Fam3	7500 PSI	AAB	ABC	ABC	ABB	ABC	AAB	ABC	ABB	ABC	A	ABC	AAB	ABC	AAB	AAB	AAB	ABC	AAB	AAB	AAB	NA	7500PSI.R1	0	1	0	9	2	8	19	20	1	Triploid
2023-PLATE-106_2022-2353_75-Pressure_7500PSI_R1_075	Fam2	7500 PSI	AAB	ABB	A	NA	ABC	AAB	AAB	ABB	AAB	AAB	ABC	ABB	ABC	A	ABB	AAB	ABC	ABB	AAB	A	NA	7500PSI.R1	1	3	0	7	5	4	16	20	1	Triploid
2023-PLATE-106_2022-2353_7-Pressure_7500PSI_R1_007	Fam3	7500 PSI	AAB	ABC	ABC	ABB	ABC	AAB	ABC	ABB	ABC	A	ABC	AAB	ABB	AAB	AAB	AAB	ABC	ABB	AAB	A	NA	7500PSI.R1	0	2	0	7	4	7	18	20	1	Triploid
2023-PLATE-106_2022-2353_8-Pressure_7500PSI_R1_008	Fam2	7500 PSI	AAB	ABC	ABC	NA	ABC	A	ABC	AAB	AAB	ABB	AAB	ABB	AAB	A	ABB	AAB	ABC	ABB	A	ABB	NA	7500PSI.R1	1	3	0	6	5	5	16	20	1	Triploid
2023-PLATE-106_2022-2353_9-Pressure_7500PSI_R1_009	Fam2	7500 PSI	ABB	ABC	ABC	NA	ABC	AAB	ABC	A	ABC	ABC	ABB	AAB	ABC	A	ABB	AAB	ABC	ABB	ABB	ABB	NA	7500PSI.R1	1	2	0	3	6	8	17	20	1	Triploid
2023-PLATE-106_2023-435_188-Pressure_6500PSI_R2_123	Fam3	6500 PSI	AB	AB	AB	AB	AB	AB	AB	A	AB	A	AB	AB	AB	A	AB	AB	AB	A	A	A	NA	6500PSI.R2	0	6	14	0	0	0	0	20	0	Diploid
2023-PLATE-106_2023-435_189-Pressure_6500PSI_R2_124	Fam1	6500 PSI	AB	AB	AB	AB	AB	A	AB	AB	A	AB	AB	AB	AB	A	AB	AB	AB	A	AB	A	NA	6500PSI.R2	0	5	15	0	0	0	0	20	0	Diploid
2023-PLATE-106_2023-435_190-Pressure_6500PSI_R2_125	Fam1	6500 PSI	AB	AB	AB	AB	A	AB	AB	A	AB	AB	AB	A	A	A	AB	AB	AB	AB	A	A	NA	6500PSI.R2	0	7	13	0	0	0	0	20	0	Diploid
2023-PLATE-106_2023-435_191-Pressure_6500PSI_R2_126	Fam1	6500 PSI	AB	AB	AB	AB	AB	AB	AB	AB	AB	AB	AB	A	AB	A	AB	ABB	AB	AAB	AB	AB	NA	6500PSI.R2	0	2	16	1	1	0	2	20	0.111111	Aneuploid
2023-PLATE-106_2023-435_192-Pressure_6500PSI_R2_127	Fam1	6500 PSI	AB	AB	AB	AB	AB	A	AB	AB	AB	AB	A	AB	AB	A	AB	AB	AB	A	A	A	NA	6500PSI.R2	0	6	14	0	0	0	0	20	0	Diploid
2023-PLATE-106_2023-435_193-Pressure_6500PSI_R2_128	Fam1	6500 PSI	AB	AB	AB	AB	AB	AB	AB	A	AB	AB	A	A	A	A	AB	AB	AB	AB	A	A	NA	6500PSI.R2	0	7	13	0	0	0	0	20	0	Diploid
2023-PLATE-106_2023-435_194-Pressure_6500PSI_R2_129	Fam1	6500 PSI	AB	AB	AB	AB	AB	AB	AB	A	AB	AB	A	AB	AB	A	AB	A	AB	A	A	AB	NA	6500PSI.R2	0	6	14	0	0	0	0	20	0	Diploid
2023-PLATE-106_2023-435_195-Pressure_6500PSI_R2_131	Fam3	6500 PSI	ABB	ABC	ABC	ABB	ABC	AAB	ABC	ABB	ABC	A	ABC	AAB	ABC	AAB	AAB	AAB	ABC	ABB	A	AAB	NA	6500PSI.R2	0	2	0	6	4	8	18	20	1	Triploid
2023-PLATE-106_2023-435_196-Pressure_6500PSI_R2_132	Fam1	6500 PSI	AB	AB	AB	AB	AB	AB	AB	AB	AB	A	A	AB	AB	AB	AB	AB	AB	A	A	AB	NA	6500PSI.R2	0	4	16	0	0	0	0	20	0	Diploid
2023-PLATE-106_2023-435_197-Pressure_6500PSI_R2_133	Fam2	6500 PSI	AB	AB	AB	NA	AB	A	AB	A	AB	AB	AB	AB	AB	A	A	AB	AB	A	AB	AB	NA	6500PSI.R2	1	5	14	0	0	0	0	20	0	Diploid
2023-PLATE-106_2023-435_198-Pressure_6500PSI_R2_134	Fam2	6500 PSI	AB	AB	AB	A	AB	AB	AB	AB	AB	AB	AB	A	AB	A	A	AB	AB	AB	A	AB	NA	6500PSI.R2	0	5	15	0	0	0	0	20	0	Diploid
2023-PLATE-106_2023-435_199-Pressure_6500PSI_R2_136	Fam1	6500 PSI	AB	AB	AB	AB	AB	AB	AB	AB	AB	AB	A	AB	AB	A	AB	AB	AB	AB	A	AB	NA	6500PSI.R2	0	3	17	0	0	0	0	20	0	Diploid
2023-PLATE-106_2023-435_200-Pressure_6500PSI_R2_137	Fam3	6500 PSI	AB	AB	AB	AB	AB	A	AB	A	AB	AB	AB	AB	AB	AB	AB	AB	AB	A	AB	A	NA	6500PSI.R2	0	4	16	0	0	0	0	20	0	Diploid
2023-PLATE-106_2023-435_201-Pressure_6500PSI_R2_138	Fam1	6500 PSI	AB	AB	AB	AB	AB	AB	AB	A	A	AB	AB	A	A	A	AB	AB	AB	AB	AB	AB	NA	6500PSI.R2	0	5	15	0	0	0	0	20	0	Diploid
2023-PLATE-106_2023-435_202-Pressure_6500PSI_R2_139	Fam2	6500 PSI	AB	AB	AB	NA	AB	AB	AB	AB	A	AB	AB	AB	AB	A	AB	AB	AB	A	A	AB	NA	6500PSI.R2	1	4	15	0	0	0	0	20	0	Diploid
2023-PLATE-106_2023-435_203-Pressure_6500PSI_R2_141	Fam1	6500 PSI	AB	AB	AB	AB	A	A	AB	AB	AB	A	AB	A	AB	AB	AB	AB	AB	AB	A	AB	NA	6500PSI.R2	0	5	15	0	0	0	0	20	0	Diploid
2023-PLATE-106_2023-435_204-Pressure_6500PSI_R2_144	Fam1	6500 PSI	AB	AB	AB	AB	AB	AB	AB	A	A	AB	AB	AB	A	AB	AB	AB	AB	A	A	AB	NA	6500PSI.R2	0	5	15	0	0	0	0	20	0	Diploid
2023-PLATE-106_2023-435_205-Pressure_6500PSI_R2_146	Fam2	6500 PSI	AB	AB	A	A	AB	AB	AB	AB	AB	A	AB	AB	AB	A	A	AB	AB	AB	AB	ABB	NA	6500PSI.R2	0	5	14	0	1	0	1	20	0.0666667	Aneuploid
2023-PLATE-106_2023-435_206-Pressure_6500PSI_R2_147	Fam1	6500 PSI	AB	AB	A	AB	AB	A	AB	A	AB	AB	AB	A	AB	AB	AB	AB	AB	A	AB	AB	NA	6500PSI.R2	0	5	15	0	0	0	0	20	0	Diploid
2023-PLATE-107_2022-2353_100-Pressure_7500PSI_R1_100	Fam3	7500 PSI	AAB	ABC	AAB	ABB	ABC	A	ABC	A	AAB	A	ABC	ABC	AAB	A	AAB	AAB	ABC	ABB	ABB	AAB	NA	7500PSI.R1	0	4	0	7	3	6	16	20	1	Triploid
2023-PLATE-107_2022-2353_101-Pressure_7500PSI_R2_001	Fam3	7500 PSI	ABB	ABC	ABC	ABB	ABC	AAB	ABC	A	AAB	A	ABC	ABC	ABC	A	AAB	A	ABC	ABC	A	AAB	NA	7500PSI.R2	0	5	0	4	2	9	15	20	1	Triploid
2023-PLATE-107_2022-2353_102-Pressure_7500PSI_R2_002	Fam3	7500 PSI	ABB	ABC	ABC	ABB	ABC	AAB	ABC	ABB	ABC	AAB	ABC	ABC	ABB	AAB	AAB	AAB	ABC	ABB	AAB	AAB	NA	7500PSI.R2	0	0	0	7	5	8	20	20	1	Triploid
2023-PLATE-107_2022-2353_103-Pressure_7500PSI_R2_003	Fam1	7500 PSI	ABB	ABC	ABB	ABC	AAB	AAB	ABB	ABB	ABB	ABC	ABB	AAB	AAB	AAB	ABB	ABC	ABB	ABC	AAB	A	NA	7500PSI.R2	0	1	0	6	8	5	19	20	1	Triploid
2023-PLATE-107_2022-2353_104-Pressure_7500PSI_R2_004	Fam2	7500 PSI	AAB	ABC	ABB	NA	ABC	A	ABC	ABB	ABB	ABB	ABC	ABB	AAB	ABB	ABB	AAB	ABC	A	A	ABB	NA	7500PSI.R2	1	3	0	3	8	5	16	20	1	Triploid
2023-PLATE-107_2022-2353_105-Pressure_7500PSI_R2_005	Fam2	7500 PSI	AAB	ABC	ABB	NA	ABB	AAB	ABC	ABB	ABC	ABB	ABB	ABB	ABB	ABB	ABB	AAB	ABC	ABB	ABB	A	NA	7500PSI.R2	1	1	0	3	11	4	18	20	1	Triploid
2023-PLATE-107_2022-2353_106-Pressure_7500PSI_R2_006	Fam1	7500 PSI	ABB	ABC	A	ABC	ABB	A	ABB	A	ABB	ABC	ABB	A	ABC	A	ABC	ABB	ABB	ABB	AAB	AAB	NA	7500PSI.R2	0	5	0	2	8	5	15	20	1	Triploid
2023-PLATE-107_2022-2353_107-Pressure_7500PSI_R2_007	Fam3	7500 PSI	AAB	ABC	ABC	ABB	ABC	AAB	ABC	ABB	ABC	AAB	ABC	ABC	ABC	A	AAB	A	ABC	ABC	A	A	NA	7500PSI.R2	0	4	0	4	2	10	16	20	1	Triploid
2023-PLATE-107_2022-2353_108-Pressure_7500PSI_R2_008	Fam1	7500 PSI	AAB	ABC	A	ABC	ABC	A	AAB	A	ABC	AAB	ABC	A	ABC	AAB	ABB	AAB	ABB	ABC	A	A	NA	7500PSI.R2	0	6	0	5	2	7	14	20	1	Triploid
2023-PLATE-107_2022-2353_109-Pressure_7500PSI_R2_009	Fam3	7500 PSI	AAB	ABC	ABC	ABB	ABC	A	ABC	ABB	ABC	A	ABC	ABC	AAB	AAB	AAB	AAB	ABC	ABB	AAB	A	NA	7500PSI.R2	0	3	0	6	3	8	17	20	1	Triploid
2023-PLATE-107_2022-2353_110-Pressure_7500PSI_R2_010	Fam1	7500 PSI	ABB	ABC	A	ABC	ABB	A	AAB	ABB	ABB	AAB	ABB	A	ABC	A	ABC	ABB	ABB	ABB	AAB	A	NA	7500PSI.R2	0	5	0	3	8	4	15	20	1	Triploid
2023-PLATE-107_2022-2353_111-Pressure_7500PSI_R2_011	Fam3	7500 PSI	AAB	ABC	ABC	ABB	ABC	A	ABC	ABB	ABC	AAB	ABC	ABB	AAB	A	AAB	A	ABC	AAB	AAB	A	NA	7500PSI.R2	0	4	0	6	3	7	16	20	1	Triploid
2023-PLATE-107_2022-2353_112-Pressure_7500PSI_R2_012	Fam1	7500 PSI	ABC	ABC	ABB	ABC	ABB	AAB	AAB	ABB	ABB	AAB	ABB	A	AAB	A	ABC	ABB	ABB	ABB	AAB	A	NA	7500PSI.R2	0	3	0	5	8	4	17	20	1	Triploid
2023-PLATE-107_2022-2353_113-Pressure_7500PSI_R2_013	Fam1	7500 PSI	ABB	ABC	A	ABC	ABC	A	AAB	ABB	ABC	AAB	ABC	AAB	ABC	A	ABB	ABC	ABB	ABC	A	AAB	NA	7500PSI.R2	0	4	0	4	4	8	16	20	1	Triploid
2023-PLATE-107_2022-2353_114-Pressure_7500PSI_R2_014	Fam1	7500 PSI	AAB	ABC	ABB	ABC	ABB	A	AAB	A	AAB	AAB	A	AAB	ABC	AAB	ABC	ABB	ABB	ABB	AAB	AAB	NA	7500PSI.R2	0	3	0	8	5	4	17	20	1	Triploid
2023-PLATE-107_2022-2353_115-Pressure_7500PSI_R2_015	Fam3	7500 PSI	ABB	ABC	ABC	ABB	ABC	A	ABC	ABB	ABC	A	ABC	AAB	AAB	A	AAB	A	ABC	ABC	AAB	A	NA	7500PSI.R2	0	5	0	4	3	8	15	20	1	Triploid
2023-PLATE-107_2022-2353_116-Pressure_7500PSI_R2_016	Fam1	7500 PSI	ABB	ABC	A	ABC	ABB	AAB	ABB	A	ABB	ABC	ABB	A	AAB	AAB	ABC	ABB	ABB	AAB	A	AAB	NA	7500PSI.R2	0	4	0	5	7	4	16	20	1	Triploid
2023-PLATE-107_2022-2353_117-Pressure_7500PSI_R2_017	Fam1	7500 PSI	ABC	ABC	A	ABC	ABC	AAB	AAB	A	ABC	A	ABC	AAB	AAB	AAB	ABC	A	ABB	ABB	ABB	AAB	NA	7500PSI.R2	0	4	0	6	3	7	16	20	1	Triploid
2023-PLATE-107_2022-2353_118-Pressure_7500PSI_R2_018	Fam3	7500 PSI	AAB	ABC	ABC	ABB	ABC	AAB	ABC	A	ABC	AAB	ABC	AAB	ABC	AAB	AAB	A	ABC	ABC	ABB	AAB	NA	7500PSI.R2	0	2	0	7	2	9	18	20	1	Triploid
2023-PLATE-107_2022-2353_119-Pressure_7500PSI_R2_019	Fam3	7500 PSI	AAB	ABC	ABC	ABB	ABC	A	ABC	A	ABC	A	ABC	AAB	AAB	AAB	AAB	A	ABC	AAB	AAB	A	NA	7500PSI.R2	0	5	0	7	1	7	15	20	1	Triploid
2023-PLATE-107_2022-2353_120-Pressure_7500PSI_R2_020	Fam3	7500 PSI	NA	NA	NA	AB	NA	AAB	ABC	A	ABC	A	NA	NA	NA	A	NA	A	ABC	NA	AAB	AAB	NA	7500PSI.R2	9	4	1	3	0	3	6	20	0.857143	Aneuploid
2023-PLATE-107_2022-2353_121-Pressure_7500PSI_R2_021	Fam3	7500 PSI	AAB	ABC	ABC	ABB	ABC	A	ABC	ABB	ABC	A	ABC	ABC	ABB	AAB	AAB	A	ABC	ABC	AAB	A	NA	7500PSI.R2	0	4	0	4	3	9	16	20	1	Triploid
2023-PLATE-107_2022-2353_122-Pressure_7500PSI_R2_022	Fam1	7500 PSI	ABC	ABC	A	ABC	ABC	AAB	ABB	ABB	ABB	AAB	ABB	AAB	AAB	AAB	ABC	ABB	ABB	AAB	AAB	AAB	NA	7500PSI.R2	0	1	0	8	6	5	19	20	1	Triploid
2023-PLATE-107_2022-2353_123-Pressure_7500PSI_R2_023	Fam1	7500 PSI	ABB	ABC	ABB	ABC	ABC	AAB	AAB	A	ABB	ABB	ABC	AAB	AAB	A	ABC	ABC	ABB	ABC	ABB	AAB	NA	7500PSI.R2	0	2	0	5	6	7	18	20	1	Triploid
2023-PLATE-107_2022-2353_124-Pressure_7500PSI_R2_024	Fam2	7500 PSI	ABB	ABC	ABC	A	ABC	AAB	ABC	ABB	AAB	A	ABB	ABB	ABC	A	ABB	AAB	ABC	ABB	AAB	ABB	NA	7500PSI.R2	0	3	0	4	7	6	17	20	1	Triploid
2023-PLATE-107_2022-2353_125-Pressure_7500PSI_R2_025	Fam2	7500 PSI	ABB	ABC	ABC	A	AAB	A	ABC	AAB	ABB	ABB	ABC	ABB	AAB	ABB	ABB	AAB	ABC	ABB	A	ABB	NA	7500PSI.R2	0	3	0	4	8	5	17	20	1	Triploid
2023-PLATE-107_2022-2353_126-Pressure_7500PSI_R2_026	Fam3	7500 PSI	AAB	ABC	ABC	ABB	ABC	A	ABC	A	ABB	A	ABC	AAB	ABB	AAB	AAB	A	ABC	ABC	AAB	A	NA	7500PSI.R2	0	5	0	5	3	7	15	20	1	Triploid
2023-PLATE-107_2022-2353_127-Pressure_7500PSI_R2_027	Fam3	7500 PSI	ABB	ABC	ABC	ABB	ABC	AAB	ABC	ABB	ABB	A	ABC	ABC	ABC	AAB	AAB	AAB	ABC	ABB	AAB	AAB	NA	7500PSI.R2	0	1	0	6	5	8	19	20	1	Triploid
2023-PLATE-107_2022-2353_128-Pressure_7500PSI_R2_028	Fam3	7500 PSI	ABB	ABC	ABC	NA	ABC	AAB	ABC	ABB	ABC	AAB	ABC	ABC	ABC	A	AAB	A	ABC	ABC	ABB	AAB	NA	7500PSI.R2	1	2	0	4	3	10	17	20	1	Triploid
2023-PLATE-107_2022-2353_129-Pressure_7500PSI_R2_029	Fam1	7500 PSI	ABB	ABC	ABB	ABC	ABC	A	AAB	A	AAB	A	ABB	A	ABC	A	ABC	ABB	NA	ABB	AAB	A	NA	7500PSI.R2	1	6	0	3	5	5	13	20	1	Triploid
2023-PLATE-107_2022-2353_130-Pressure_7500PSI_R2_030	Fam3	7500 PSI	AAB	ABC	ABC	ABB	ABC	AAB	ABC	ABB	ABB	A	ABB	ABC	ABC	AAB	AAB	A	ABC	ABC	AAB	A	NA	7500PSI.R2	0	3	0	5	4	8	17	20	1	Triploid
2023-PLATE-107_2022-2353_131-Pressure_7500PSI_R2_031	Fam1	7500 PSI	ABB	ABC	A	ABC	AAB	A	ABB	A	ABB	AAB	ABB	AAB	ABC	A	ABC	ABC	ABB	ABC	AAB	A	NA	7500PSI.R2	0	5	0	4	5	6	15	20	1	Triploid
2023-PLATE-107_2022-2353_132-Pressure_7500PSI_R2_032	Fam1	7500 PSI	ABC	ABC	ABB	ABC	ABB	A	AAB	NA	ABB	AAB	ABB	AAB	ABC	A	ABC	ABB	ABB	ABB	AAB	A	NA	7500PSI.R2	1	3	0	4	7	5	16	20	1	Triploid
2023-PLATE-107_2022-2353_133-Pressure_7500PSI_R2_033	Fam1	7500 PSI	AAB	ABC	ABB	ABC	AAB	A	AAB	ABB	ABB	ABC	ABB	A	ABB	AAB	ABC	ABB	ABB	ABB	AAB	A	NA	7500PSI.R2	0	3	0	5	8	4	17	20	1	Triploid
2023-PLATE-107_2022-2353_134-Pressure_7500PSI_R2_034	Fam1	7500 PSI	AB	AB	A	AB	AB	A	AB	AB	AB	AB	AB	AB	AB	A	AB	AB	AB	A	AB	A	NA	7500PSI.R2	0	5	15	0	0	0	0	20	0	Diploid
2023-PLATE-107_2022-2353_135-Pressure_7500PSI_R2_035	Fam3	7500 PSI	AAB	ABC	ABC	ABB	ABC	AAB	ABC	ABB	AAB	AAB	ABC	ABC	ABC	A	AAB	A	ABC	ABC	AAB	AAB	NA	7500PSI.R2	0	2	0	7	2	9	18	20	1	Triploid
2023-PLATE-107_2022-2353_136-Pressure_7500PSI_R2_036	Fam1	7500 PSI	ABC	ABC	ABB	ABC	ABB	AAB	ABB	ABB	ABC	AAB	ABC	AAB	ABB	AAB	ABC	AAB	ABB	ABC	A	AAB	NA	7500PSI.R2	0	1	0	6	6	7	19	20	1	Triploid
2023-PLATE-107_2022-2353_137-Pressure_7500PSI_R2_037	Fam2	7500 PSI	AAB	ABC	ABC	NA	ABC	A	ABC	ABB	AAB	ABC	ABC	A	AAB	ABB	ABB	AAB	ABC	A	AAB	ABB	NA	7500PSI.R2	1	3	0	5	4	7	16	20	1	Triploid
2023-PLATE-107_2022-2353_138-Pressure_7500PSI_R2_038	Fam1	7500 PSI	ABB	ABC	ABB	ABC	ABC	A	ABB	A	ABC	AAB	ABC	A	ABC	AAB	ABC	ABB	ABB	ABB	ABB	AAB	NA	7500PSI.R2	0	3	0	3	7	7	17	20	1	Triploid
2023-PLATE-107_2022-2353_139-Pressure_7500PSI_R2_039	Fam3	7500 PSI	ABB	ABC	ABC	ABB	ABC	AAB	ABC	A	ABC	AAB	ABC	ABC	ABC	AAB	AAB	AAB	ABC	AAB	A	A	NA	7500PSI.R2	0	3	0	6	2	9	17	20	1	Triploid
2023-PLATE-107_2022-2353_140-Pressure_7500PSI_R2_040	Fam3	7500 PSI	ABB	ABC	ABC	ABB	ABC	AAB	ABC	ABB	ABB	A	ABC	AAB	ABB	AAB	AAB	A	ABC	ABC	AAB	AAB	NA	7500PSI.R2	0	2	0	6	5	7	18	20	1	Triploid
2023-PLATE-107_2022-2353_141-Pressure_7500PSI_R2_041	Fam2	7500 PSI	AAB	AAB	ABC	NA	ABC	AAB	ABC	ABB	ABC	ABB	ABB	AAB	ABC	AAB	ABB	AAB	ABC	ABB	A	ABB	NA	7500PSI.R2	1	1	0	6	6	6	18	20	1	Triploid
2023-PLATE-107_2022-2353_142-Pressure_7500PSI_R2_042	Fam3	7500 PSI	ABB	ABC	ABC	NA	ABC	A	ABC	NA	ABC	A	ABC	ABC	AAB	A	AAB	AAB	ABC	ABB	ABB	A	NA	7500PSI.R2	2	4	0	3	3	8	14	20	1	Triploid
2023-PLATE-107_2022-2353_143-Pressure_7500PSI_R2_043	Fam3	7500 PSI	AAB	ABC	ABC	NA	ABC	AAB	ABC	ABB	AAB	AAB	AAB	AAB	ABC	AAB	AAB	A	ABC	ABC	AAB	AAB	NA	7500PSI.R2	1	1	0	10	1	7	18	20	1	Triploid
2023-PLATE-107_2022-2353_144-Pressure_7500PSI_R2_044	Fam1	7500 PSI	ABB	ABC	ABB	ABC	AAB	AAB	ABB	NA	ABC	AAB	ABC	A	AAB	AAB	ABC	ABB	ABB	ABB	AAB	A	NA	7500PSI.R2	1	2	0	6	6	5	17	20	1	Triploid
2023-PLATE-107_2022-2353_145-Pressure_7500PSI_R2_045	Fam2	7500 PSI	ABB	ABC	ABB	A	ABC	AAB	AAB	ABB	AAB	ABB	ABC	A	ABC	A	ABB	AAB	ABC	A	AAB	ABC	NA	7500PSI.R2	0	4	0	5	5	6	16	20	1	Triploid
2023-PLATE-107_2022-2353_146-Pressure_7500PSI_R2_046	Fam3	7500 PSI	ABB	ABC	ABC	NA	ABC	A	ABC	ABB	ABC	AAB	ABC	AAB	AAB	AAB	AAB	A	ABC	ABC	AAB	A	NA	7500PSI.R2	1	3	0	6	2	8	16	20	1	Triploid
2023-PLATE-107_2022-2353_147-Pressure_7500PSI_R2_047	Fam1	7500 PSI	AAB	ABC	ABB	ABC	ABC	A	AAB	ABB	ABB	ABC	ABB	AAB	ABB	AAB	AB	ABC	ABB	ABC	ABB	A	NA	7500PSI.R2	0	2	1	4	7	6	17	20	0.944444	Aneuploid
2023-PLATE-107_2022-2353_148-Pressure_7500PSI_R2_048	Fam3	7500 PSI	ABB	ABC	ABC	ABB	ABC	A	ABB	ABB	ABC	A	ABC	AAB	AAB	AAB	AAB	A	ABC	ABC	AAB	A	NA	7500PSI.R2	0	4	0	5	4	7	16	20	1	Triploid
2023-PLATE-107_2022-2353_149-Pressure_7500PSI_R2_049	Fam3	7500 PSI	AAB	ABC	ABC	ABB	ABC	A	ABC	A	ABC	A	ABC	ABC	AAB	AAB	AAB	A	ABC	ABC	AAB	A	NA	7500PSI.R2	0	5	0	5	1	9	15	20	1	Triploid
2023-PLATE-107_2022-2353_150-Pressure_7500PSI_R2_050	Fam1	7500 PSI	AAB	ABC	A	ABC	ABC	AAB	ABB	NA	ABC	AAB	ABC	A	A	A	ABC	AAB	ABB	ABC	AAB	AAB	NA	7500PSI.R2	1	4	0	6	2	7	15	20	1	Triploid
2023-PLATE-107_2022-2353_151-Pressure_7500PSI_R2_051	Fam2	7500 PSI	AAB	ABC	ABC	NA	ABC	A	ABC	ABB	ABC	ABB	ABB	ABB	AAB	ABB	A	AAB	ABC	ABB	AAB	ABC	NA	7500PSI.R2	1	2	0	4	6	7	17	20	1	Triploid
2023-PLATE-107_2022-2353_152-Pressure_7500PSI_R2_052	Fam2	7500 PSI	AAB	ABC	ABC	A	AAB	A	AAB	NA	AAB	ABB	ABC	ABB	AAB	AAB	ABB	AAB	ABC	A	AAB	A	NA	7500PSI.R2	1	4	0	8	3	4	15	20	1	Triploid
2023-PLATE-107_2022-2353_153-Pressure_7500PSI_R2_053	Fam3	7500 PSI	AAB	ABC	ABC	ABB	ABC	A	ABC	ABB	ABC	AAB	ABC	AAB	AAB	AAB	AAB	A	ABC	ABC	AAB	A	NA	7500PSI.R2	0	3	0	7	2	8	17	20	1	Triploid
2023-PLATE-107_2022-2353_154-Pressure_7500PSI_R2_054	Fam1	7500 PSI	ABC	ABC	A	ABC	ABC	AAB	AAB	ABB	ABC	AAB	ABC	A	ABB	AAB	ABC	ABB	ABB	ABB	AAB	AAB	NA	7500PSI.R2	0	2	0	6	5	7	18	20	1	Triploid
2023-PLATE-107_2022-2353_155-Pressure_7500PSI_R2_055	Fam1	7500 PSI	ABB	AAB	ABB	ABC	ABB	A	ABB	NA	A	ABC	ABB	A	ABB	AAB	ABB	ABB	ABB	ABB	A	AAB	NA	7500PSI.R2	1	4	0	3	10	2	15	20	1	Triploid
2023-PLATE-107_2022-2353_156-Pressure_7500PSI_R2_056	Fam3	7500 PSI	AAB	ABC	ABC	ABB	ABC	A	ABC	ABB	ABC	A	ABC	ABC	AAB	A	AAB	AAB	ABC	AAB	A	AAB	NA	7500PSI.R2	0	4	0	6	2	8	16	20	1	Triploid
2023-PLATE-107_2022-2353_76-Pressure_7500PSI_R1_076	Fam3	7500 PSI	ABB	ABC	ABC	ABB	ABC	A	ABC	A	ABB	A	ABC	ABC	A	AAB	AAB	AAB	ABC	ABB	AAB	A	NA	7500PSI.R1	0	5	0	4	4	7	15	20	1	Triploid
2023-PLATE-107_2022-2353_77-Pressure_7500PSI_R1_077	Fam2	7500 PSI	ABB	ABC	ABC	NA	ABC	A	AAB	AAB	ABC	ABC	ABB	ABC	AAB	A	ABB	AAB	ABC	A	A	ABB	NA	7500PSI.R1	1	4	0	4	4	7	15	20	1	Triploid
2023-PLATE-107_2022-2353_78-Pressure_7500PSI_R1_078	Fam3	7500 PSI	ABB	ABC	ABC	ABB	ABC	A	ABB	ABB	ABC	A	ABC	ABC	AAB	A	AAB	A	ABC	AAB	AAB	A	NA	7500PSI.R1	0	5	0	4	4	7	15	20	1	Triploid
2023-PLATE-107_2022-2353_79-Pressure_7500PSI_R1_079	Fam1	7500 PSI	AB	AB	AB	AB	AB	A	AB	A	AB	AB	AB	AB	AB	AB	AB	AB	AB	AB	AB	AB	NA	7500PSI.R1	0	2	18	0	0	0	0	20	0	Diploid
2023-PLATE-107_2022-2353_80-Pressure_7500PSI_R1_080	Fam3	7500 PSI	ABB	ABC	ABC	NA	ABC	AAB	ABC	ABB	ABC	A	ABC	A	ABC	A	AAB	A	ABC	ABC	ABB	AAB	NA	7500PSI.R1	1	4	0	3	3	9	15	20	1	Triploid
2023-PLATE-107_2022-2353_81-Pressure_7500PSI_R1_081	Fam1	7500 PSI	ABB	ABC	A	ABC	ABC	A	ABB	ABB	ABC	AAB	ABC	AAB	ABC	A	ABC	ABB	ABB	ABB	AAB	AAB	NA	7500PSI.R1	0	3	0	4	6	7	17	20	1	Triploid
2023-PLATE-107_2022-2353_82-Pressure_7500PSI_R1_082	Fam1	7500 PSI	AB	AB	A	AB	AB	A	AB	AB	AB	AB	AB	A	AB	A	AB	AB	AB	AB	AB	A	NA	7500PSI.R1	0	5	15	0	0	0	0	20	0	Diploid
2023-PLATE-107_2022-2353_83-Pressure_7500PSI_R1_083	Fam3	7500 PSI	ABB	ABC	ABC	ABB	ABC	A	AAB	ABB	ABC	A	ABC	ABC	A	AAB	AAB	A	ABC	ABC	AAB	AAB	NA	7500PSI.R1	0	4	0	5	3	8	16	20	1	Triploid
2023-PLATE-107_2022-2353_84-Pressure_7500PSI_R1_084	Fam2	7500 PSI	AAB	ABC	ABC	NA	ABC	AAB	ABC	ABB	AAB	A	ABB	ABC	ABC	A	ABB	AAB	NA	A	A	ABC	NA	7500PSI.R1	2	4	0	4	3	7	14	20	1	Triploid
2023-PLATE-107_2022-2353_85-Pressure_7500PSI_R1_085	Fam3	7500 PSI	AAB	ABC	ABC	NA	AAB	AAB	ABC	ABB	ABC	A	ABC	AAB	ABB	A	AAB	A	ABC	ABC	AAB	AAB	NA	7500PSI.R1	1	3	0	7	2	7	16	20	1	Triploid
2023-PLATE-107_2022-2353_86-Pressure_7500PSI_R1_086	Fam2	7500 PSI	AAB	ABB	ABC	NA	ABC	A	ABC	A	ABB	ABB	ABC	AAB	AAB	AAB	A	AAB	ABC	ABB	AAB	ABB	NA	7500PSI.R1	1	3	0	6	5	5	16	20	1	Triploid
2023-PLATE-107_2022-2353_87-Pressure_7500PSI_R1_087	Fam3	7500 PSI	AAB	ABC	ABC	ABB	ABC	A	ABC	A	ABC	AAB	ABC	AAB	ABB	A	AAB	A	ABC	AAB	AAB	A	NA	7500PSI.R1	0	5	0	6	2	7	15	20	1	Triploid
2023-PLATE-107_2022-2353_88-Pressure_7500PSI_R1_088	Fam2	7500 PSI	ABB	ABC	ABC	A	ABC	AAB	ABC	ABB	A	ABB	ABC	ABC	ABB	AAB	A	AAB	ABC	A	A	ABB	NA	7500PSI.R1	0	5	0	3	5	7	15	20	1	Triploid
2023-PLATE-107_2022-2353_89-Pressure_7500PSI_R1_089	Fam3	7500 PSI	ABB	ABC	ABC	NA	ABC	A	ABC	A	ABC	AAB	ABC	AAB	AAB	AAB	AAB	A	ABC	ABC	ABB	AAB	NA	7500PSI.R1	1	3	0	6	2	8	16	20	1	Triploid
2023-PLATE-107_2022-2353_90-Pressure_7500PSI_R1_090	Fam1	7500 PSI	ABB	ABC	A	ABC	ABB	AAB	AAB	ABB	ABC	ABC	ABC	A	AAB	A	ABC	ABB	ABB	ABC	AAB	AAB	NA	7500PSI.R1	0	3	0	5	5	7	17	20	1	Triploid
2023-PLATE-107_2022-2353_91-Pressure_7500PSI_R1_091	Fam1	7500 PSI	ABB	ABC	A	ABC	ABC	AAB	ABB	A	ABB	ABB	ABB	AAB	AAB	A	ABC	AAB	ABB	ABC	AAB	A	NA	7500PSI.R1	0	4	0	5	6	5	16	20	1	Triploid
2023-PLATE-107_2022-2353_92-Pressure_7500PSI_R1_092	Fam2	7500 PSI	AAB	ABC	A	NA	NA	NA	ABC	A	AAB	ABC	ABC	ABB	AAB	A	AAB	AAB	ABC	ABB	AAB	ABB	NA	7500PSI.R1	3	3	0	6	3	5	14	20	1	Triploid
2023-PLATE-107_2022-2353_93-Pressure_7500PSI_R1_093	Fam3	7500 PSI	ABB	ABC	AAB	NA	ABC	AAB	ABC	A	ABC	A	ABC	AAB	ABC	A	AAB	A	ABC	ABC	AAB	A	NA	7500PSI.R1	1	5	0	5	1	8	14	20	1	Triploid
2023-PLATE-107_2022-2353_94-Pressure_7500PSI_R1_094	Fam3	7500 PSI	ABB	ABC	ABC	NA	ABC	A	ABC	A	AAB	A	ABC	ABC	AAB	A	AAB	AAB	ABC	ABB	AAB	AAB	NA	7500PSI.R1	1	4	0	6	2	7	15	20	1	Triploid
2023-PLATE-107_2022-2353_95-Pressure_7500PSI_R1_095	Fam3	7500 PSI	AAB	ABC	ABC	ABB	ABC	AAB	ABC	A	ABC	AAB	ABC	AAB	ABB	AAB	AAB	A	ABC	ABC	AAB	AAB	NA	7500PSI.R1	0	2	0	8	2	8	18	20	1	Triploid
2023-PLATE-107_2022-2353_96-Pressure_7500PSI_R1_096	Fam3	7500 PSI	ABB	ABC	ABC	ABB	ABC	A	ABC	ABB	ABC	AAB	ABC	ABB	AAB	AAB	AAB	AAB	ABC	ABB	AAB	A	NA	7500PSI.R1	0	2	0	6	5	7	18	20	1	Triploid
2023-PLATE-107_2022-2353_97-Pressure_7500PSI_R1_097	Fam3	7500 PSI	ABB	ABC	ABC	ABB	ABC	A	ABB	ABB	ABC	A	ABC	ABC	AAB	A	AAB	A	ABC	ABC	A	A	NA	7500PSI.R1	0	6	0	2	4	8	14	20	1	Triploid
2023-PLATE-107_2022-2353_98-Pressure_7500PSI_R1_098	Fam3	7500 PSI	AAB	ABC	ABC	ABB	ABC	A	ABC	A	ABC	AAB	ABC	ABC	AAB	AAB	AAB	A	ABC	AAB	ABB	AAB	NA	7500PSI.R1	0	3	0	7	2	8	17	20	1	Triploid
2023-PLATE-107_2022-2353_99-Pressure_7500PSI_R1_099	Fam2	7500 PSI	AAB	ABC	ABB	A	ABC	AAB	ABC	AAB	ABB	ABB	ABC	ABB	ABB	AAB	ABB	AAB	ABC	A	AAB	ABC	NA	7500PSI.R1	0	2	0	6	6	6	18	20	1	Triploid
2023-PLATE-109_2022-2353_157-Pressure_7500PSI_R2_057	Fam3	7500 PSI	AAB	ABC	ABC	ABB	ABC	A	NA	A	NA	AAB	ABC	ABC	AAB	AAB	AAB	A	ABC	ABC	AAB	A	NA	7500PSI.R2	2	4	0	6	1	7	14	20	1	Triploid
2023-PLATE-109_2022-2353_158-Pressure_7500PSI_R2_058	Fam1	7500 PSI	AB	AB	A	AB	ABB	A	AB	A	AB	AB	AB	AB	AB	A	AB	A	ABB	AB	AB	AB	NA	7500PSI.R2	0	5	13	0	2	0	2	20	0.133333	Aneuploid
2023-PLATE-109_2022-2353_159-Pressure_7500PSI_R2_059	Fam1	7500 PSI	ABC	ABC	ABB	ABC	ABB	AAB	AAB	A	ABC	AAB	ABC	A	AAB	AAB	ABC	ABC	ABB	ABC	AAB	A	NA	7500PSI.R2	0	3	0	6	3	8	17	20	1	Triploid
2023-PLATE-109_2022-2353_160-Pressure_7500PSI_R2_060	Fam2	7500 PSI	AAB	ABC	ABC	NA	NA	AAB	ABC	ABB	AAB	ABC	ABC	ABB	ABB	AAB	A	AAB	ABC	NA	AAB	A	NA	7500PSI.R2	3	2	0	6	3	6	15	20	1	Triploid
2023-PLATE-109_2022-2353_161-Pressure_7500PSI_R2_061	Fam3	7500 PSI	AAB	ABC	ABC	NA	NA	NA	ABC	A	AAB	AAB	AAB	AAB	ABC	AAB	AAB	AAB	ABC	ABB	AAB	AAB	NA	7500PSI.R2	3	1	0	10	1	5	16	20	1	Triploid
2023-PLATE-109_2022-2353_162-Pressure_7500PSI_R2_062	Fam2	7500 PSI	ABB	ABC	ABC	A	AAB	AAB	ABC	ABB	ABC	ABB	ABB	ABB	ABB	AAB	AAB	AAB	ABC	A	AAB	ABB	NA	7500PSI.R2	0	2	0	6	7	5	18	20	1	Triploid
2023-PLATE-109_2022-2353_163-Pressure_7500PSI_R2_063	Fam1	7500 PSI	ABB	ABC	ABB	ABC	ABC	A	NA	ABB	ABB	ABC	ABB	AAB	ABC	A	ABC	A	ABB	AAB	AAB	A	NA	7500PSI.R2	1	4	0	3	6	6	15	20	1	Triploid
2023-PLATE-109_2022-2353_164-Pressure_7500PSI_R2_064	Fam3	7500 PSI	ABB	NA	ABC	ABB	ABC	AAB	ABC	ABB	ABB	AAB	ABC	ABC	ABC	A	AAB	AAB	ABC	ABB	AAB	AAB	NA	7500PSI.R2	1	1	0	6	5	7	18	20	1	Triploid
2023-PLATE-109_2022-2353_165-Pressure_7500PSI_R2_065	Fam3	7500 PSI	AAB	ABC	ABC	ABB	ABC	A	ABC	ABB	AAB	AAB	ABC	AAB	A	A	AAB	AAB	ABC	ABB	ABB	AAB	NA	7500PSI.R2	0	3	0	7	4	6	17	20	1	Triploid
2023-PLATE-109_2022-2353_166-Pressure_7500PSI_R2_066	Fam3	7500 PSI	ABB	ABC	ABC	NA	ABC	A	AAB	ABB	ABC	AAB	ABC	AAB	AAB	AAB	AAB	A	ABC	AAB	AAB	AAB	NA	7500PSI.R2	1	2	0	9	2	6	17	20	1	Triploid
2023-PLATE-109_2022-2353_167-Pressure_7500PSI_R2_067	Fam1	7500 PSI	AB	AB	A	AB	A	AB	AB	AB	AB	AB	AB	A	AB	A	AB	AB	AB	A	AB	AB	NA	7500PSI.R2	0	5	15	0	0	0	0	20	0	Diploid
2023-PLATE-109_2022-2353_168-Pressure_7500PSI_R2_068	Fam1	7500 PSI	ABC	ABC	A	ABC	ABC	AAB	AAB	A	ABB	ABC	ABB	A	AAB	A	ABC	ABB	ABB	ABB	A	AAB	NA	7500PSI.R2	0	5	0	4	5	6	15	20	1	Triploid
2023-PLATE-109_2022-2353_169-Pressure_7500PSI_R2_069	Fam3	7500 PSI	AAB	ABC	ABC	ABB	ABB	A	ABC	A	ABC	A	ABC	AAB	A	A	AAB	A	ABC	ABC	AAB	A	NA	7500PSI.R2	0	7	0	4	2	7	13	20	1	Triploid
2023-PLATE-109_2022-2353_170-Pressure_7500PSI_R2_070	Fam1	7500 PSI	AAB	ABC	ABB	ABC	ABB	A	ABB	ABB	ABC	AAB	ABC	AAB	ABB	AAB	ABC	AAB	ABB	A	AAB	A	NA	7500PSI.R2	0	3	0	6	6	5	17	20	1	Triploid
2023-PLATE-109_2022-2353_171-Pressure_7500PSI_R2_071	Fam3	7500 PSI	AAB	ABC	ABC	ABB	ABC	AAB	ABC	ABB	ABB	A	ABC	AAB	ABB	A	AAB	A	ABC	ABC	AAB	AAB	NA	7500PSI.R2	0	3	0	6	4	7	17	20	1	Triploid
2023-PLATE-109_2022-2353_172-Pressure_7500PSI_R2_072	Fam3	7500 PSI	AAB	ABC	ABC	NA	ABC	A	ABC	ABB	ABC	A	ABC	ABC	AAB	A	AAB	A	ABC	ABC	AAB	A	NA	7500PSI.R2	1	5	0	4	1	9	14	20	1	Triploid
2023-PLATE-109_2022-2353_173-Pressure_7500PSI_R2_073	Fam3	7500 PSI	ABB	ABC	ABC	ABB	AAB	A	ABC	A	AAB	AAB	ABC	ABC	A	AAB	AAB	AAB	ABC	ABB	AAB	AAB	NA	7500PSI.R2	0	3	0	8	3	6	17	20	1	Triploid
2023-PLATE-109_2022-2353_174-Pressure_7500PSI_R2_074	Fam1	7500 PSI	ABB	ABC	A	ABC	ABB	AAB	AAB	A	ABB	ABC	ABB	AAB	AAB	A	ABC	ABB	ABB	ABC	AAB	A	NA	7500PSI.R2	0	4	0	5	6	5	16	20	1	Triploid
2023-PLATE-109_2022-2353_175-Pressure_7500PSI_R2_075	Fam1	7500 PSI	ABB	ABC	A	ABC	AAB	A	AAB	ABB	AAB	AAB	ABB	AAB	ABC	AAB	ABC	ABB	ABB	ABB	ABB	A	NA	7500PSI.R2	0	3	0	6	7	4	17	20	1	Triploid
2023-PLATE-109_2022-2353_176-Pressure_7500PSI_R2_076	Fam3	7500 PSI	AAB	ABC	ABC	ABB	ABC	A	ABC	A	AAB	A	ABC	AAB	AAB	AAB	AAB	AAB	ABC	ABB	AAB	AAB	bp shift	7500PSI.R2	0	3	0	9	2	6	17	20	1	Triploid
2023-PLATE-109_2022-2353_177-Pressure_7500PSI_R2_077	Fam3	7500 PSI	AAB	ABC	ABC	ABB	ABC	A	AAB	A	ABC	AAB	ABC	AAB	AAB	AAB	AAB	A	ABC	ABC	AAB	A	NA	7500PSI.R2	0	4	0	8	1	7	16	20	1	Triploid
2023-PLATE-109_2022-2353_178-Pressure_7500PSI_R2_078	Fam3	7500 PSI	ABB	ABC	ABC	ABB	ABC	AAB	ABC	A	ABC	A	ABC	AAB	ABB	A	AAB	A	ABC	ABC	AAB	A	NA	7500PSI.R2	0	5	0	4	3	8	15	20	1	Triploid
2023-PLATE-109_2022-2353_179-Pressure_7500PSI_R2_079	Fam1	7500 PSI	AAB	ABC	A	ABC	ABC	AAB	AAB	ABB	A	AAB	ABB	AAB	AAB	A	ABC	ABC	ABB	ABC	A	A	NA	7500PSI.R2	0	5	0	6	3	6	15	20	1	Triploid
2023-PLATE-109_2022-2353_180-Pressure_7500PSI_R2_080	Fam3	7500 PSI	ABB	ABC	ABC	ABB	ABC	AAB	ABC	A	ABC	A	ABC	AAB	ABB	A	AAB	AAB	ABC	ABB	A	A	NA	7500PSI.R2	0	5	0	4	4	7	15	20	1	Triploid
2023-PLATE-109_2022-2353_181-Pressure_7500PSI_R2_081	Fam2	7500 PSI	AAB	ABC	ABC	NA	ABC	AAB	ABC	ABB	AAB	ABC	ABC	ABB	ABC	ABB	ABB	AAB	ABC	ABB	ABB	ABC	NA	7500PSI.R2	1	0	0	4	6	9	19	20	1	Triploid
2023-PLATE-109_2022-2353_182-Pressure_7500PSI_R2_082	Fam1	7500 PSI	ABB	ABC	ABB	ABC	AAB	A	AAB	ABB	AAB	AAB	ABB	AAB	ABC	A	ABC	ABB	ABB	ABC	AAB	A	NA	7500PSI.R2	0	3	0	6	6	5	17	20	1	Triploid
2023-PLATE-109_2022-2353_183-Pressure_7500PSI_R2_083	Fam1	7500 PSI	ABB	ABC	A	ABC	ABC	AAB	AAB	ABB	ABB	ABC	ABB	A	AAB	A	ABC	A	ABB	ABB	A	AAB	NA	7500PSI.R2	0	5	0	4	6	5	15	20	1	Triploid
2023-PLATE-109_2022-2353_184-Pressure_7500PSI_R2_084	Fam1	7500 PSI	ABC	ABC	A	ABC	ABB	AAB	AAB	ABB	ABB	ABC	ABB	AAB	AAB	AAB	AAB	ABB	ABB	ABB	ABB	AAB	NA	7500PSI.R2	0	1	0	7	8	4	19	20	1	Triploid
2023-PLATE-109_2022-2353_185-Pressure_7500PSI_R2_085	Fam1	7500 PSI	ABC	ABC	A	ABC	ABC	AAB	ABB	A	ABC	AAB	ABC	AAB	AAB	A	ABC	ABB	ABB	ABB	AAB	AAB	NA	7500PSI.R2	0	3	0	6	4	7	17	20	1	Triploid
2023-PLATE-109_2022-2353_186-Pressure_7500PSI_R2_086	Fam1	7500 PSI	AAB	ABB	ABB	ABC	ABB	AAB	AAB	ABB	ABB	AAB	ABB	AAB	AAB	AAB	ABC	ABB	ABB	ABB	AAB	AAB	NA	7500PSI.R2	0	0	0	9	9	2	20	20	1	Triploid
2023-PLATE-109_2022-2353_187-Pressure_7500PSI_R2_087	Fam3	7500 PSI	AAB	ABC	ABC	ABB	ABC	AAB	AAB	ABB	ABC	AAB	ABC	AAB	ABC	AAB	AAB	AAB	ABC	ABB	AAB	NA	NA	7500PSI.R2	1	0	0	9	3	7	19	20	1	Triploid
2023-PLATE-109_2022-2353_188-Pressure_7500PSI_R2_088	Fam1	7500 PSI	ABC	ABC	A	ABC	ABB	A	ABB	A	ABB	A	NA	NA	ABC	NA	NA	ABC	ABB	NA	AAB	NA	NA	7500PSI.R2	6	4	0	1	4	5	10	20	1	Triploid
2023-PLATE-109_2022-2353_189-Pressure_7500PSI_R2_089	Fam1	7500 PSI	ABB	ABC	ABB	ABC	ABC	AAB	ABB	A	ABC	AAB	ABC	AAB	AAB	A	AAB	AAB	ABB	A	AAB	A	NA	7500PSI.R2	0	4	0	7	4	5	16	20	1	Triploid
2023-PLATE-109_2022-2353_190-Pressure_7500PSI_R2_090	Fam3	7500 PSI	AAB	ABC	ABC	NA	ABC	AAB	ABC	A	ABB	A	ABC	AAB	ABC	AAB	AAB	A	ABC	ABC	AAB	AAB	NA	7500PSI.R2	1	3	0	7	1	8	16	20	1	Triploid
2023-PLATE-109_2022-2353_191-Pressure_7500PSI_R2_091	Fam1	7500 PSI	ABC	ABC	ABB	ABC	ABC	AAB	AAB	ABB	ABB	ABC	ABB	A	AAB	AAB	ABC	ABB	ABB	ABB	AAB	AAB	NA	7500PSI.R2	0	1	0	6	7	6	19	20	1	Triploid
2023-PLATE-109_2022-2353_192-Pressure_7500PSI_R2_092	Fam3	7500 PSI	AAB	ABC	ABC	ABB	ABC	A	ABC	ABB	ABC	A	ABC	ABC	AAB	A	AAB	AAB	ABC	AAB	AAB	AAB	NA	7500PSI.R2	0	3	0	7	2	8	17	20	1	Triploid
2023-PLATE-109_2022-2353_194-Pressure_7500PSI_R2_094	Fam2	7500 PSI	AAB	ABC	ABB	NA	ABC	A	AAB	ABB	ABB	ABB	ABC	ABC	AAB	AAB	A	AAB	ABC	A	AAB	ABB	NA	7500PSI.R2	1	3	0	6	5	5	16	20	1	Triploid
2023-PLATE-109_2022-2353_195-Pressure_7500PSI_R2_095	Fam1	7500 PSI	AAB	ABC	ABB	ABC	ABB	AAB	AAB	A	ABC	AAB	ABC	A	AAB	AAB	ABB	ABB	ABB	ABB	ABB	AAB	NA	7500PSI.R2	0	2	0	7	7	4	18	20	1	Triploid
2023-PLATE-109_2022-2353_196-Pressure_7500PSI_R2_096	Fam3	7500 PSI	ABB	ABC	ABC	ABB	ABC	AAB	AAB	A	ABC	A	ABB	AAB	ABB	A	AAB	A	ABC	ABC	AAB	AAB	NA	7500PSI.R2	0	4	0	6	4	6	16	20	1	Triploid
2023-PLATE-109_2022-2353_197-Pressure_7500PSI_R2_097	Fam3	7500 PSI	ABB	ABC	ABC	ABB	ABC	AAB	AAB	A	ABC	AAB	ABC	AAB	ABC	A	AAB	A	ABC	AAB	AAB	AAB	NA	7500PSI.R2	0	3	0	8	2	7	17	20	1	Triploid
2023-PLATE-109_2022-2353_198-Pressure_7500PSI_R2_098	Fam3	7500 PSI	AAB	ABC	ABC	ABB	ABC	AAB	ABC	ABB	ABB	A	ABC	AAB	ABC	AAB	AAB	A	ABC	ABC	ABB	AAB	NA	7500PSI.R2	0	2	0	6	4	8	18	20	1	Triploid
2023-PLATE-109_2022-2353_199-Pressure_7500PSI_R2_099	Fam1	7500 PSI	AAB	ABC	ABB	ABC	A	AAB	ABB	A	ABB	AAB	ABB	A	ABB	A	ABC	ABC	ABB	ABC	ABB	A	NA	7500PSI.R2	0	5	0	3	7	5	15	20	1	Triploid
2023-PLATE-109_2022-2353_200-Pressure_7500PSI_R2_100	Fam3	7500 PSI	ABB	ABC	ABC	ABB	ABC	A	ABC	ABB	ABB	A	ABC	AAB	A	A	AAB	A	ABC	ABC	AAB	A	NA	7500PSI.R2	0	6	0	3	4	7	14	20	1	Triploid
2023-PLATE-109_2022-2354_10-Pressure_8500PSI_R1_010	Fam1	8500 PSI	AAB	ABC	ABB	ABC	ABB	AAB	AAB	ABB	ABC	AAB	ABC	A	AAB	AAB	ABC	ABC	ABB	ABC	AAB	AAB	NA	8500PSI.R1	0	1	0	8	4	7	19	20	1	Triploid
2023-PLATE-109_2022-2354_11-Pressure_8500PSI_R1_011	Fam3	8500 PSI	ABB	ABC	ABC	ABB	ABC	AAB	ABC	A	ABC	AAB	ABC	ABC	ABC	A	AAB	AAB	ABC	ABB	A	A	NA	8500PSI.R1	0	4	0	4	3	9	16	20	1	Triploid
2023-PLATE-109_2022-2354_12-Pressure_8500PSI_R1_012	Fam1	8500 PSI	AAB	ABC	ABB	ABC	ABB	AAB	ABB	ABB	ABB	ABC	ABB	AAB	AAB	AAB	ABC	ABB	ABB	ABB	ABB	A	NA	8500PSI.R1	0	1	0	5	10	4	19	20	1	Triploid
2023-PLATE-109_2022-2354_13-Pressure_8500PSI_R1_013	Fam2	8500 PSI	AAB	ABC	AAB	A	ABC	A	ABC	ABB	AAB	ABB	ABC	ABB	AAB	A	ABB	AAB	ABC	ABB	AAB	ABB	NA	8500PSI.R1	0	3	0	6	6	5	17	20	1	Triploid
2023-PLATE-109_2022-2354_14-Pressure_8500PSI_R1_014	Fam3	8500 PSI	ABB	ABC	ABC	ABB	ABC	A	ABC	A	AAB	AAB	AAB	AAB	ABB	A	AAB	A	ABC	ABC	AAB	A	NA	8500PSI.R1	0	5	0	6	3	6	15	20	1	Triploid
2023-PLATE-109_2022-2354_15-Pressure_8500PSI_R1_015	Fam2	8500 PSI	ABB	ABC	AAB	A	ABC	AAB	ABC	AAB	ABC	ABC	ABB	ABB	ABC	A	AAB	AAB	ABC	A	AAB	ABB	NA	8500PSI.R1	0	3	0	6	4	7	17	20	1	Triploid
2023-PLATE-109_2022-2354_16-Pressure_8500PSI_R1_016	Fam3	8500 PSI	ABB	ABC	ABC	ABB	ABC	AAB	ABC	A	AAB	A	ABC	AAB	ABC	A	AAB	AAB	ABC	ABB	AAB	AAB	NA	8500PSI.R1	0	3	0	7	3	7	17	20	1	Triploid
2023-PLATE-109_2022-2354_17-Pressure_8500PSI_R1_017	Fam2	8500 PSI	ABB	ABC	ABB	A	ABC	AAB	ABC	ABB	ABC	A	ABB	ABB	ABB	ABB	AAB	AAB	ABC	ABB	ABB	ABC	NA	8500PSI.R1	0	2	0	3	9	6	18	20	1	Triploid
2023-PLATE-109_2022-2354_18-Pressure_8500PSI_R1_018	Fam2	8500 PSI	AAB	ABC	ABB	A	ABC	A	AAB	ABB	AAB	ABC	ABC	ABB	AAB	AAB	A	AAB	ABC	ABB	AAB	ABC	NA	8500PSI.R1	0	3	0	7	4	6	17	20	1	Triploid
2023-PLATE-109_2022-2354_19-Pressure_8500PSI_R1_019	Fam2	8500 PSI	ABB	ABC	ABC	A	ABC	AAB	ABC	ABB	ABB	ABB	ABC	ABC	ABC	A	AAB	AAB	ABC	ABB	ABB	A	NA	8500PSI.R1	0	3	0	3	6	8	17	20	1	Triploid
2023-PLATE-109_2022-2354_1-Pressure_8500PSI_R1_001	Fam1	8500 PSI	ABB	ABC	ABB	ABC	ABC	A	AAB	ABB	ABC	AAB	ABC	AAB	ABC	AAB	ABC	ABB	ABB	ABB	A	A	NA	8500PSI.R1	0	3	0	4	6	7	17	20	1	Triploid
2023-PLATE-109_2022-2354_20-Pressure_8500PSI_R1_020	Fam3	8500 PSI	AAB	ABC	ABC	ABB	ABC	A	ABC	ABB	ABC	AAB	ABC	AAB	AAB	AAB	AAB	A	ABC	ABC	ABB	AAB	NA	8500PSI.R1	0	2	0	7	3	8	18	20	1	Triploid
2023-PLATE-109_2022-2354_21-Pressure_8500PSI_R1_021	Fam1	8500 PSI	ABC	ABC	ABB	ABC	ABB	A	AAB	A	ABC	AAB	ABC	A	ABB	AAB	ABC	ABC	ABB	ABC	AAB	AAB	NA	8500PSI.R1	0	3	0	5	4	8	17	20	1	Triploid
2023-PLATE-109_2022-2354_22-Pressure_8500PSI_R1_022	Fam1	8500 PSI	ABB	ABC	ABB	ABC	ABB	A	AAB	A	ABC	AAB	ABC	AAB	ABC	AAB	ABC	ABC	ABB	ABC	AAB	A	NA	8500PSI.R1	0	3	0	5	4	8	17	20	1	Triploid
2023-PLATE-109_2022-2354_23-Pressure_8500PSI_R1_023	Fam2	8500 PSI	AAB	ABC	ABC	NA	ABC	A	ABC	A	ABC	ABC	ABB	ABC	AAB	A	AAB	AAB	ABC	ABB	ABB	ABC	NA	8500PSI.R1	1	3	0	4	3	9	16	20	1	Triploid
2023-PLATE-109_2022-2354_24-Pressure_8500PSI_R1_024	Fam3	8500 PSI	AAB	ABC	ABC	ABB	ABC	A	ABC	ABB	AAB	AAB	ABC	ABC	ABB	A	AAB	AAB	ABC	ABB	A	A	NA	8500PSI.R1	0	4	0	5	4	7	16	20	1	Triploid
2023-PLATE-109_2022-2354_25-Pressure_8500PSI_R1_025	Fam3	8500 PSI	ABB	ABC	ABC	ABB	ABC	A	ABC	A	ABC	AAB	ABC	AAB	AAB	A	AAB	AAB	ABC	ABB	AAB	A	NA	8500PSI.R1	0	4	0	6	3	7	16	20	1	Triploid
2023-PLATE-109_2022-2354_26-Pressure_8500PSI_R1_026	Fam3	8500 PSI	ABB	ABC	ABC	ABB	ABC	A	ABB	ABB	AAB	AAB	ABC	ABC	A	AAB	AAB	A	ABC	AAB	AAB	A	NA	8500PSI.R1	0	4	0	6	4	6	16	20	1	Triploid
2023-PLATE-109_2022-2354_27-Pressure_8500PSI_R1_027	Fam2	8500 PSI	ABB	ABC	ABC	A	ABC	AAB	ABC	AAB	AAB	A	ABB	ABC	ABC	A	ABB	AAB	ABC	A	AAB	ABC	NA	8500PSI.R1	0	4	0	5	3	8	16	20	1	Triploid
2023-PLATE-109_2022-2354_28-Pressure_8500PSI_R1_028	Fam2	8500 PSI	ABB	ABC	ABB	NA	AAB	A	ABC	ABB	AAB	ABC	ABC	ABB	AAB	AAB	ABB	AAB	ABC	ABB	ABB	AAB	NA	8500PSI.R1	1	1	0	6	7	5	18	20	1	Triploid
2023-PLATE-109_2022-2354_29-Pressure_8500PSI_R1_029	Fam3	8500 PSI	ABB	ABC	ABC	ABB	ABC	A	ABC	ABB	ABC	AAB	ABC	AAB	AAB	A	AAB	A	ABC	ABC	ABB	A	NA	8500PSI.R1	0	4	0	4	4	8	16	20	1	Triploid
2023-PLATE-109_2022-2354_2-Pressure_8500PSI_R1_002	Fam1	8500 PSI	ABB	ABC	ABB	ABC	ABC	AAB	AAB	A	ABC	AAB	ABC	A	AAB	A	ABC	ABC	ABB	ABC	AAB	A	NA	8500PSI.R1	0	4	0	5	3	8	16	20	1	Triploid
2023-PLATE-109_2022-2354_30-Pressure_8500PSI_R1_030	Fam2	8500 PSI	ABB	ABC	ABB	NA	ABC	A	ABC	AAB	AAB	ABC	ABC	ABB	ABB	A	ABB	AAB	ABC	A	AAB	A	NA	8500PSI.R1	1	4	0	4	5	6	15	20	1	Triploid
2023-PLATE-109_2022-2354_31-Pressure_8500PSI_R1_031	Fam1	8500 PSI	ABB	ABC	ABB	ABC	ABC	AAB	ABB	A	ABB	ABC	ABB	AAB	AAB	AAB	ABC	ABC	ABB	ABC	AAB	A	NA	8500PSI.R1	0	2	0	5	6	7	18	20	1	Triploid
2023-PLATE-109_2022-2354_32-Pressure_8500PSI_R1_032	Fam2	8500 PSI	AAB	ABC	ABC	A	ABC	A	ABB	ABB	AAB	ABB	ABC	ABB	AAB	ABB	A	AAB	ABC	ABB	ABB	ABC	NA	8500PSI.R1	0	3	0	4	7	6	17	20	1	Triploid
2023-PLATE-109_2022-2354_33-Pressure_8500PSI_R1_033	Fam2	8500 PSI	ABB	ABC	AAB	A	ABC	AAB	ABC	AAB	AAB	ABC	ABC	ABB	ABC	A	ABB	AAB	ABC	ABB	ABB	A	NA	8500PSI.R1	0	3	0	5	5	7	17	20	1	Triploid
2023-PLATE-109_2022-2354_34-Pressure_8500PSI_R1_034	Fam2	8500 PSI	ABB	ABC	ABB	A	AAB	AAB	ABC	A	ABC	A	ABB	ABB	ABB	AAB	ABB	AAB	ABC	A	AAB	A	NA	8500PSI.R1	0	5	0	5	6	4	15	20	1	Triploid
2023-PLATE-109_2022-2354_35-Pressure_8500PSI_R1_035	Fam2	8500 PSI	ABB	ABC	ABB	NA	AAB	A	AAB	AAB	ABC	ABC	ABB	ABC	AAB	A	ABB	AAB	ABC	A	ABB	AAB	NA	8500PSI.R1	1	3	0	6	5	5	16	20	1	Triploid
2023-PLATE-109_2022-2354_36-Pressure_8500PSI_R1_036	Fam3	8500 PSI	ABB	ABC	ABB	ABB	ABC	AAB	ABC	A	AAB	AAB	ABC	AAB	ABC	AAB	AAB	AAB	ABC	ABB	A	A	NA	8500PSI.R1	0	3	0	7	4	6	17	20	1	Triploid
2023-PLATE-109_2022-2354_37-Pressure_8500PSI_R1_037	Fam2	8500 PSI	ABB	ABC	ABB	NA	ABC	AAB	ABC	ABB	ABC	ABC	ABB	ABC	ABC	A	ABB	AAB	ABC	ABB	AAB	AAB	NA	8500PSI.R1	1	1	0	4	6	8	18	20	1	Triploid
2023-PLATE-109_2022-2354_38-Pressure_8500PSI_R1_038	Fam3	8500 PSI	ABB	ABC	ABC	ABB	ABC	A	ABC	ABB	AAB	A	ABC	ABC	ABB	A	AAB	A	ABC	ABC	AAB	A	NA	8500PSI.R1	0	5	0	3	4	8	15	20	1	Triploid
2023-PLATE-109_2022-2354_39-Pressure_8500PSI_R1_039	Fam3	8500 PSI	AAB	ABB	ABC	ABB	ABC	AAB	ABC	ABB	ABC	AAB	ABC	AAB	ABB	AAB	AAB	A	ABC	ABC	ABB	AAB	NA	8500PSI.R1	0	1	0	7	5	7	19	20	1	Triploid
2023-PLATE-109_2022-2354_3-Pressure_8500PSI_R1_003	Fam3	8500 PSI	AAB	ABC	ABC	ABB	ABC	A	ABC	ABB	ABC	A	ABC	ABC	AAB	A	AAB	AAB	ABC	ABB	AAB	A	NA	8500PSI.R1	0	4	0	5	3	8	16	20	1	Triploid
2023-PLATE-109_2022-2354_40-Pressure_8500PSI_R1_040	Fam1	8500 PSI	AAB	ABC	ABB	ABC	ABC	AAB	AAB	A	ABC	AAB	ABC	A	AAB	A	ABC	ABC	ABB	ABC	AAB	A	bp shift	8500PSI.R1	0	4	0	6	2	8	16	20	1	Triploid
2023-PLATE-109_2022-2354_41-Pressure_8500PSI_R1_041	Fam1	8500 PSI	AAB	ABC	A	ABC	ABC	A	ABB	A	ABB	AAB	ABC	A	AAB	A	ABC	ABC	ABB	ABC	AAB	A	NA	8500PSI.R1	0	6	0	4	3	7	14	20	1	Triploid
2023-PLATE-109_2022-2354_42-Pressure_8500PSI_R1_042	Fam1	8500 PSI	ABB	ABC	ABB	ABC	ABC	AAB	AAB	ABB	ABB	ABB	ABC	A	ABB	A	ABC	AAB	ABB	AAB	AAB	AAB	NA	8500PSI.R1	0	2	0	6	7	5	18	20	1	Triploid
2023-PLATE-109_2022-2354_43-Pressure_8500PSI_R1_043	Fam3	8500 PSI	ABB	ABC	ABC	ABB	ABC	AAB	ABC	A	ABC	A	ABC	AAB	ABB	A	AAB	A	ABC	ABC	A	A	NA	8500PSI.R1	0	6	0	3	3	8	14	20	1	Triploid
2023-PLATE-109_2022-2354_44-Pressure_8500PSI_R1_044	Fam2	8500 PSI	AAB	ABC	ABB	A	ABC	AAB	ABC	ABB	AAB	AAB	ABB	ABB	ABC	A	ABB	AAB	ABC	A	AAB	AAB	NA	8500PSI.R1	0	3	0	7	5	5	17	20	1	Triploid
2023-PLATE-109_2022-2354_45-Pressure_8500PSI_R1_045	Fam2	8500 PSI	AAB	ABC	ABB	NA	ABC	A	ABC	ABB	AAB	ABB	ABB	ABB	AAB	ABB	ABB	AAB	ABC	A	ABB	ABB	NA	8500PSI.R1	1	2	0	4	9	4	17	20	1	Triploid
2023-PLATE-109_2022-2354_46-Pressure_8500PSI_R1_046	Fam2	8500 PSI	AAB	AB	ABB	A	ABC	A	ABB	AAB	AAB	A	ABB	ABB	A	A	ABB	AAB	ABC	A	ABB	ABC	NA	8500PSI.R1	0	6	1	4	6	3	13	20	0.928571	Aneuploid
2023-PLATE-109_2022-2354_47-Pressure_8500PSI_R1_047	Fam2	8500 PSI	AAB	ABC	ABB	A	ABC	AAB	ABC	AAB	AAB	ABC	ABC	ABB	ABC	A	A	AAB	ABC	ABB	A	ABB	NA	8500PSI.R1	0	4	0	5	4	7	16	20	1	Triploid
2023-PLATE-109_2022-2354_48-Pressure_8500PSI_R1_048	Fam3	8500 PSI	AAB	ABC	ABC	ABB	ABC	A	ABC	ABB	ABC	A	ABC	ABC	AAB	AAB	AAB	A	ABC	ABC	A	A	NA	8500PSI.R1	0	5	0	4	2	9	15	20	1	Triploid
2023-PLATE-109_2022-2354_49-Pressure_8500PSI_R1_049	Fam3	8500 PSI	AAB	ABC	ABC	ABB	ABC	A	ABC	ABB	ABC	AAB	ABC	AAB	AAB	A	AAB	A	ABC	ABC	AAB	AAB	NA	8500PSI.R1	0	3	0	7	2	8	17	20	1	Triploid
2023-PLATE-109_2022-2354_4-Pressure_8500PSI_R1_004	Fam1	8500 PSI	AAB	ABC	ABB	ABC	ABC	AAB	AAB	ABB	ABC	ABB	ABC	AAB	AAB	AAB	AAB	ABC	ABB	ABC	A	AAB	NA	8500PSI.R1	0	1	0	8	4	7	19	20	1	Triploid
2023-PLATE-109_2022-2354_50-Pressure_8500PSI_R1_050	Fam3	8500 PSI	ABB	ABC	ABC	ABB	ABC	A	ABC	ABB	ABC	A	ABC	AAB	AAB	A	AAB	AAB	ABC	AAB	A	A	NA	8500PSI.R1	0	5	0	5	3	7	15	20	1	Triploid
2023-PLATE-109_2022-2354_5-Pressure_8500PSI_R1_005	Fam1	8500 PSI	ABC	ABC	A	ABC	ABB	AAB	AAB	A	ABC	ABC	ABC	A	ABB	A	ABC	AAB	ABB	AAB	ABB	AAB	NA	8500PSI.R1	0	4	0	5	4	7	16	20	1	Triploid
2023-PLATE-109_2022-2354_6-Pressure_8500PSI_R1_006	Fam2	8500 PSI	AAB	ABC	ABB	NA	ABC	A	ABC	ABB	ABB	ABB	ABC	ABB	AAB	A	AAB	AAB	ABC	ABB	A	A	NA	8500PSI.R1	1	4	0	4	6	5	15	20	1	Triploid
2023-PLATE-109_2022-2354_7-Pressure_8500PSI_R1_007	Fam2	8500 PSI	AAB	ABC	ABB	A	AAB	AAB	ABB	ABB	ABB	ABB	ABC	ABC	ABB	A	A	AAB	ABC	A	ABB	ABB	NA	8500PSI.R1	0	4	0	4	8	4	16	20	1	Triploid
2023-PLATE-109_2022-2354_8-Pressure_8500PSI_R1_008	Fam1	8500 PSI	ABB	ABC	A	ABC	ABC	A	ABB	ABB	ABB	ABC	ABB	AAB	ABC	AAB	ABC	ABC	ABB	ABC	ABB	A	NA	8500PSI.R1	0	3	0	2	7	8	17	20	1	Triploid
2023-PLATE-109_2022-2354_9-Pressure_8500PSI_R1_009	Fam1	8500 PSI	ABC	ABC	A	ABC	ABB	AAB	AAB	ABB	ABB	ABC	ABB	AAB	AAB	A	ABC	ABB	ABB	ABB	AAB	AAB	NA	8500PSI.R1	0	2	0	6	7	5	18	20	1	Triploid
2023-PLATE-110_2022-2354_100-Pressure_8500PSI_R1_100	Fam1	8500 PSI	AAB	NA	A	ABC	NA	NA	AAB	A	ABB	ABB	ABB	AAB	AAB	AAB	AAB	AAB	ABB	AAB	AAB	A	NA	8500PSI.R1	3	3	0	9	4	1	14	20	1	Triploid
2023-PLATE-110_2022-2354_101-Pressure_8500PSI_R2_001	Fam2	8500 PSI	ABB	NA	A	A	NA	NA	ABC	AAB	AAB	ABC	ABC	ABC	ABC	A	ABB	AAB	ABC	A	ABB	A	NA	8500PSI.R2	3	5	0	3	3	6	12	20	1	Triploid
2023-PLATE-110_2022-2354_102-Pressure_8500PSI_R2_002	Fam3	8500 PSI	ABB	NA	ABC	ABB	NA	A	ABC	A	ABC	A	ABC	AAB	A	AAB	AAB	A	ABC	ABC	ABB	A	NA	8500PSI.R2	2	6	0	3	3	6	12	20	1	Triploid
2023-PLATE-110_2022-2354_103-Pressure_8500PSI_R2_003	Fam2	8500 PSI	AAB	NA	ABC	A	NA	AAB	ABC	AAB	ABC	ABB	ABB	AAB	ABC	A	ABB	AAB	ABC	ABB	AAB	ABB	NA	8500PSI.R2	2	2	0	6	5	5	16	20	1	Triploid
2023-PLATE-110_2022-2354_104-Pressure_8500PSI_R2_004	Fam3	8500 PSI	ABB	ABC	ABC	ABB	NA	NA	ABC	A	ABC	A	ABC	AAB	ABC	AAB	AAB	A	ABC	AAB	ABB	A	NA	8500PSI.R2	2	4	0	4	3	7	14	20	1	Triploid
2023-PLATE-110_2022-2354_105-Pressure_8500PSI_R2_005	Fam3	8500 PSI	AAB	NA	ABC	ABB	NA	AAB	ABC	A	ABC	AAB	ABC	AAB	ABC	AAB	AAB	AAB	ABC	ABB	AAB	A	NA	8500PSI.R2	2	2	0	8	2	6	16	20	1	Triploid
2023-PLATE-110_2022-2354_106-Pressure_8500PSI_R2_006	Fam2	8500 PSI	AAB	ABC	ABB	A	NA	A	ABC	AAB	ABC	ABC	ABB	A	AAB	A	ABB	AAB	ABC	A	AAB	AAB	NA	8500PSI.R2	1	5	0	6	3	5	14	20	1	Triploid
2023-PLATE-110_2022-2354_107-Pressure_8500PSI_R2_007	Fam3	8500 PSI	AAB	NA	ABC	ABB	NA	A	ABC	ABB	ABC	AAB	ABC	ABC	AAB	AAB	AAB	AAB	ABC	ABB	AAB	AAB	NA	8500PSI.R2	2	1	0	8	3	6	17	20	1	Triploid
2023-PLATE-110_2022-2354_108-Pressure_8500PSI_R2_008	Fam3	8500 PSI	AAB	NA	ABC	ABB	NA	AAB	ABC	ABB	ABC	AAB	ABC	AAB	ABC	AAB	AAB	AAB	ABC	ABB	AAB	A	NA	8500PSI.R2	2	1	0	8	3	6	17	20	1	Triploid
2023-PLATE-110_2022-2354_109-Pressure_8500PSI_R2_009	Fam3	8500 PSI	AAB	ABC	ABC	ABB	NA	AAB	ABC	ABB	ABC	A	ABC	AAB	ABC	AAB	AAB	A	ABC	AAB	A	AAB	NA	8500PSI.R2	1	3	0	7	2	7	16	20	1	Triploid
2023-PLATE-110_2022-2354_110-Pressure_8500PSI_R2_010	Fam1	8500 PSI	ABB	NA	A	ABC	NA	AAB	AAB	A	ABC	ABC	ABC	AAB	AAB	A	ABC	ABC	ABB	ABC	A	AAB	NA	8500PSI.R2	2	4	0	5	2	7	14	20	1	Triploid
2023-PLATE-110_2022-2354_111-Pressure_8500PSI_R2_011	Fam1	8500 PSI	AAB	NA	A	ABC	NA	AAB	AAB	ABB	ABC	AAB	ABC	AAB	AAB	A	ABB	ABB	ABB	ABB	AAB	A	NA	8500PSI.R2	2	3	0	7	5	3	15	20	1	Triploid
2023-PLATE-110_2022-2354_112-Pressure_8500PSI_R2_012	Fam2	8500 PSI	AAB	ABC	ABB	A	NA	AAB	AAB	AAB	A	ABB	ABC	ABC	ABC	A	A	AAB	ABC	ABB	AAB	ABB	NA	8500PSI.R2	1	4	0	6	4	5	15	20	1	Triploid
2023-PLATE-110_2022-2354_113-Pressure_8500PSI_R2_013	Fam2	8500 PSI	AAB	AAB	ABB	A	NA	A	ABC	ABB	AAB	AAB	ABC	ABB	AAB	AAB	ABB	AAB	ABC	ABB	A	ABB	NA	8500PSI.R2	1	3	0	7	6	3	16	20	1	Triploid
2023-PLATE-110_2022-2354_114-Pressure_8500PSI_R2_014	Fam3	8500 PSI	AAB	NA	ABC	ABB	NA	A	ABC	ABB	ABC	A	ABC	ABC	AAB	AAB	AAB	A	ABC	ABC	AAB	AAB	NA	8500PSI.R2	2	3	0	6	2	7	15	20	1	Triploid
2023-PLATE-110_2022-2354_115-Pressure_8500PSI_R2_015	Fam1	8500 PSI	ABC	NA	ABB	ABC	NA	AAB	ABB	ABB	ABB	ABC	ABB	A	ABB	A	ABC	ABB	ABB	ABC	AAB	A	NA	8500PSI.R2	2	3	0	2	8	5	15	20	1	Triploid
2023-PLATE-110_2022-2354_116-Pressure_8500PSI_R2_016	Fam2	8500 PSI	AAB	NA	ABC	A	NA	AAB	ABC	AAB	AAB	ABC	ABB	ABB	ABC	AAB	ABB	AAB	ABC	ABB	ABB	A	NA	8500PSI.R2	2	2	0	6	5	5	16	20	1	Triploid
2023-PLATE-110_2022-2354_117-Pressure_8500PSI_R2_017	Fam2	8500 PSI	AAB	NA	ABC	A	NA	A	ABB	AAB	ABB	AAB	ABB	AAB	AAB	AAB	ABB	AAB	ABC	A	A	ABB	bp shift	8500PSI.R2	2	4	0	7	5	2	14	20	1	Triploid
2023-PLATE-110_2022-2354_118-Pressure_8500PSI_R2_018	Fam2	8500 PSI	ABB	NA	ABB	A	NA	AAB	ABB	ABB	AAB	AAB	ABC	ABB	ABB	AAB	A	AAB	ABC	ABB	ABB	ABB	NA	8500PSI.R2	2	2	0	5	9	2	16	20	1	Triploid
2023-PLATE-110_2022-2354_119-Pressure_8500PSI_R2_019	Fam1	8500 PSI	AAB	NA	ABB	ABC	NA	AAB	ABB	A	ABB	A	ABC	A	AAB	A	ABC	ABB	ABB	ABB	A	AAB	NA	8500PSI.R2	2	5	0	4	6	3	13	20	1	Triploid
2023-PLATE-110_2022-2354_120-Pressure_8500PSI_R2_020	Fam1	8500 PSI	ABB	NA	A	ABC	NA	AAB	AAB	A	ABC	AAB	ABC	AAB	AAB	AAB	ABC	ABB	ABB	ABB	AAB	A	NA	8500PSI.R2	2	3	0	7	4	4	15	20	1	Triploid
2023-PLATE-110_2022-2354_121-Pressure_8500PSI_R2_021	Fam2	8500 PSI	ABB	NA	ABC	A	NA	AAB	ABB	ABB	AAB	ABC	ABC	ABC	ABC	A	A	AAB	ABC	A	ABB	AAB	NA	8500PSI.R2	2	4	0	4	4	6	14	20	1	Triploid
2023-PLATE-110_2022-2354_122-Pressure_8500PSI_R2_022	Fam1	8500 PSI	ABB	NA	ABB	ABC	NA	AAB	AAB	ABB	ABC	AAB	ABC	A	AAB	A	ABC	A	ABB	AAB	ABB	AAB	NA	8500PSI.R2	2	3	0	6	5	4	15	20	1	Triploid
2023-PLATE-110_2022-2354_123-Pressure_8500PSI_R2_023	Fam1	8500 PSI	ABC	NA	ABB	ABC	NA	AAB	AAB	ABB	ABB	NA	ABB	AAB	NA	A	ABC	NA	NA	AAB	NA	AAB	NA	8500PSI.R2	7	1	0	5	4	3	12	20	1	Triploid
2023-PLATE-110_2022-2354_124-Pressure_8500PSI_R2_024	Fam3	8500 PSI	ABB	NA	ABC	ABB	NA	NA	ABC	ABB	ABC	A	ABC	AAB	ABC	AAB	AAB	A	ABC	ABC	AAB	AAB	NA	8500PSI.R2	3	2	0	5	3	7	15	20	1	Triploid
2023-PLATE-110_2022-2354_125-Pressure_8500PSI_R2_025	Fam3	8500 PSI	ABB	ABC	ABC	ABB	NA	A	ABC	ABB	ABB	A	ABB	AAB	ABB	AAB	AAB	AAB	ABC	ABB	AAB	AAB	NA	8500PSI.R2	1	2	0	6	7	4	17	20	1	Triploid
2023-PLATE-110_2022-2354_126-Pressure_8500PSI_R2_026	Fam3	8500 PSI	ABB	NA	ABC	ABB	NA	AAB	ABC	A	ABC	A	ABC	AAB	ABC	A	AAB	A	ABC	ABC	AAB	AAB	NA	8500PSI.R2	2	4	0	5	2	7	14	20	1	Triploid
2023-PLATE-110_2022-2354_127-Pressure_8500PSI_R2_027	Fam3	8500 PSI	ABB	ABC	ABC	ABB	NA	A	AAB	ABB	ABC	A	ABC	ABC	AAB	AAB	AAB	AAB	ABC	ABB	A	A	NA	8500PSI.R2	1	4	0	5	4	6	15	20	1	Triploid
2023-PLATE-110_2022-2354_128-Pressure_8500PSI_R2_028	Fam2	8500 PSI	ABB	NA	ABB	A	NA	A	ABC	AAB	AAB	A	ABB	ABB	AAB	AAB	AAB	AAB	ABC	ABB	ABB	ABB	NA	8500PSI.R2	2	3	0	6	7	2	15	20	1	Triploid
2023-PLATE-110_2022-2354_129-Pressure_8500PSI_R2_029	Fam2	8500 PSI	AAB	NA	ABC	A	NA	AAB	AAB	AAB	AAB	ABC	ABC	ABB	ABC	A	ABB	AAB	ABC	ABB	AAB	ABC	NA	8500PSI.R2	2	2	0	7	3	6	16	20	1	Triploid
2023-PLATE-110_2022-2354_130-Pressure_8500PSI_R2_030	Fam3	8500 PSI	AAB	NA	ABC	ABB	NA	AAB	AAB	A	ABC	A	ABC	AAB	NA	A	AAB	AAB	ABC	ABB	AAB	NA	NA	8500PSI.R2	4	3	0	7	2	4	13	20	1	Triploid
2023-PLATE-110_2022-2354_131-Pressure_8500PSI_R2_031	Fam3	8500 PSI	AAB	NA	ABC	ABB	NA	A	ABC	A	ABC	AAB	ABC	AAB	A	AAB	AAB	A	ABC	AAB	A	AAB	NA	8500PSI.R2	2	5	0	7	1	5	13	20	1	Triploid
2023-PLATE-110_2022-2354_132-Pressure_8500PSI_R2_032	Fam2	8500 PSI	AAB	NA	A	A	NA	A	ABC	ABB	ABC	ABB	ABB	ABB	AAB	AAB	A	AAB	ABC	A	AAB	ABB	NA	8500PSI.R2	2	5	0	5	5	3	13	20	1	Triploid
2023-PLATE-110_2022-2354_133-Pressure_8500PSI_R2_033	Fam2	8500 PSI	ABB	NA	A	A	NA	AAB	ABC	A	AAB	AAB	ABB	ABB	ABC	AAB	ABB	AAB	AB	A	AAB	A	NA	8500PSI.R2	2	5	1	6	4	2	12	20	0.923077	Aneuploid
2023-PLATE-110_2022-2354_134-Pressure_8500PSI_R2_034	Fam1	8500 PSI	AAB	NA	ABB	ABC	NA	A	AAB	ABB	ABB	ABB	ABC	AAB	ABC	AAB	ABC	ABC	ABB	ABC	A	AAB	NA	8500PSI.R2	2	2	0	5	5	6	16	20	1	Triploid
2023-PLATE-110_2022-2354_135-Pressure_8500PSI_R2_035	Fam2	8500 PSI	ABB	NA	ABB	A	NA	A	ABC	ABB	AAB	A	ABB	A	AAB	ABB	AAB	AAB	ABC	A	AAB	ABB	NA	8500PSI.R2	2	5	0	5	6	2	13	20	1	Triploid
2023-PLATE-110_2022-2354_136-Pressure_8500PSI_R2_036	Fam1	8500 PSI	AAB	NA	ABB	ABC	NA	A	AAB	ABB	ABC	AAB	ABC	AAB	ABC	A	ABC	ABC	ABB	ABC	ABB	AAB	NA	8500PSI.R2	2	2	0	5	4	7	16	20	1	Triploid
2023-PLATE-110_2022-2354_137-Pressure_8500PSI_R2_037	Fam2	8500 PSI	ABB	NA	ABB	A	NA	AAB	ABC	AAB	ABC	ABC	ABB	ABB	ABC	ABB	A	AAB	ABC	A	ABB	ABB	NA	8500PSI.R2	2	3	0	3	7	5	15	20	1	Triploid
2023-PLATE-110_2022-2354_138-Pressure_8500PSI_R2_038	Fam2	8500 PSI	ABB	NA	ABC	A	NA	A	ABC	ABB	ABB	ABB	ABC	ABB	ABB	ABB	ABB	AAB	ABC	A	AAB	ABB	NA	8500PSI.R2	2	3	0	2	9	4	15	20	1	Triploid
2023-PLATE-110_2022-2354_139-Pressure_8500PSI_R2_039	Fam3	8500 PSI	ABB	NA	ABC	ABB	NA	AAB	ABC	ABB	ABC	A	ABC	ABC	ABC	A	AAB	AAB	ABC	ABB	AAB	AAB	NA	8500PSI.R2	2	2	0	5	4	7	16	20	1	Triploid
2023-PLATE-110_2022-2354_140-Pressure_8500PSI_R2_040	Fam2	8500 PSI	ABB	NA	ABB	A	NA	A	ABC	ABB	AAB	ABC	ABC	ABC	AAB	A	ABB	AAB	ABC	ABB	A	ABB	NA	8500PSI.R2	2	4	0	3	6	5	14	20	1	Triploid
2023-PLATE-110_2022-2354_141-Pressure_8500PSI_R2_041	Fam2	8500 PSI	AAB	NA	ABB	A	NA	AAB	ABC	ABB	AAB	ABC	ABC	ABB	ABC	AAB	ABB	AAB	ABC	ABB	A	ABB	NA	8500PSI.R2	2	2	0	5	6	5	16	20	1	Triploid
2023-PLATE-110_2022-2354_142-Pressure_8500PSI_R2_042	Fam3	8500 PSI	ABB	NA	ABC	ABB	NA	NA	ABC	A	ABC	A	ABC	AAB	ABC	A	AAB	AAB	ABC	ABB	A	AAB	NA	8500PSI.R2	3	4	0	4	3	6	13	20	1	Triploid
2023-PLATE-110_2022-2354_143-Pressure_8500PSI_R2_043	Fam1	8500 PSI	ABC	NA	ABB	ABC	NA	A	ABB	ABB	ABC	AAB	ABC	A	ABC	AAB	ABC	ABB	ABB	ABB	AAB	AAB	NA	8500PSI.R2	2	2	0	4	6	6	16	20	1	Triploid
2023-PLATE-110_2022-2354_144-Pressure_8500PSI_R2_044	Fam1	8500 PSI	ABC	ABB	ABB	ABC	NA	NA	AAB	ABB	ABC	AAB	ABC	AAB	AAB	A	ABC	ABB	ABB	ABB	AAB	AAB	NA	8500PSI.R2	2	1	0	6	6	5	17	20	1	Triploid
2023-PLATE-110_2022-2354_51-Pressure_8500PSI_R1_051	Fam2	8500 PSI	AAB	NA	ABB	A	NA	A	ABC	AAB	AAB	ABB	ABC	ABC	AAB	ABB	ABB	AAB	ABC	A	ABB	A	NA	8500PSI.R1	2	4	0	5	5	4	14	20	1	Triploid
2023-PLATE-110_2022-2354_52-Pressure_8500PSI_R1_052	Fam3	8500 PSI	ABB	ABC	ABC	ABB	NA	AAB	ABB	ABB	ABC	A	ABC	ABB	ABB	A	AAB	AAB	ABC	ABB	AAB	AAB	NA	8500PSI.R1	1	2	0	5	7	5	17	20	1	Triploid
2023-PLATE-110_2022-2354_53-Pressure_8500PSI_R1_053	Fam1	8500 PSI	AAB	NA	ABB	ABC	NA	A	AAB	ABB	ABC	AAB	ABC	A	ABC	AAB	ABC	AAB	ABB	A	AAB	A	NA	8500PSI.R1	2	4	0	6	3	5	14	20	1	Triploid
2023-PLATE-110_2022-2354_54-Pressure_8500PSI_R1_054	Fam3	8500 PSI	AAB	NA	ABC	ABB	NA	NA	ABC	A	ABC	AAB	ABC	ABC	ABC	AAB	AAB	AAB	ABC	ABB	AAB	AAB	NA	8500PSI.R1	3	1	0	7	2	7	16	20	1	Triploid
2023-PLATE-110_2022-2354_55-Pressure_8500PSI_R1_055	Fam2	8500 PSI	ABB	NA	ABC	A	NA	NA	ABC	ABB	AAB	A	ABB	ABC	ABC	A	ABB	AAB	ABC	A	AAB	ABC	NA	8500PSI.R1	3	4	0	3	4	6	13	20	1	Triploid
2023-PLATE-110_2022-2354_56-Pressure_8500PSI_R1_056	Fam3	8500 PSI	ABB	ABC	ABC	ABB	NA	NA	ABC	A	ABC	A	ABC	AAB	ABC	AAB	AAB	A	ABC	ABC	AAB	AAB	NA	8500PSI.R1	2	3	0	5	2	8	15	20	1	Triploid
2023-PLATE-110_2022-2354_57-Pressure_8500PSI_R1_057	Fam1	8500 PSI	ABB	NA	A	ABC	NA	AAB	AAB	A	ABB	ABC	ABB	A	AAB	A	ABC	ABB	ABB	ABB	A	A	NA	8500PSI.R1	2	6	0	3	6	3	12	20	1	Triploid
2023-PLATE-110_2022-2354_58-Pressure_8500PSI_R1_058	Fam1	8500 PSI	AAB	NA	ABB	ABC	NA	NA	ABB	A	ABB	ABC	ABB	AAB	AAB	A	ABC	ABB	ABB	ABB	ABB	AAB	NA	8500PSI.R1	3	2	0	4	8	3	15	20	1	Triploid
2023-PLATE-110_2022-2354_59-Pressure_8500PSI_R1_059	Fam1	8500 PSI	AAB	NA	A	ABC	NA	AAB	ABB	ABB	ABC	AAB	ABC	A	AAB	AAB	ABC	ABB	ABB	ABB	AAB	A	NA	8500PSI.R1	2	3	0	6	5	4	15	20	1	Triploid
2023-PLATE-110_2022-2354_60-Pressure_8500PSI_R1_060	Fam3	8500 PSI	AAB	NA	ABC	ABB	NA	AAB	ABC	ABB	ABB	A	ABC	AAB	ABC	A	AAB	AAB	ABC	ABB	A	A	NA	8500PSI.R1	2	4	0	5	4	5	14	20	1	Triploid
2023-PLATE-110_2022-2354_61-Pressure_8500PSI_R1_061	Fam2	8500 PSI	ABB	NA	ABB	A	NA	AAB	ABC	AAB	ABC	AAB	ABB	ABB	ABC	A	ABB	AAB	ABC	A	ABB	NA	NA	8500PSI.R1	3	3	0	4	6	4	14	20	1	Triploid
2023-PLATE-110_2022-2354_62-Pressure_8500PSI_R1_062	Fam1	8500 PSI	ABC	NA	ABB	ABC	NA	A	AAB	ABB	ABB	AAB	ABB	AAB	ABC	A	ABB	ABC	ABB	ABC	A	AAB	NA	8500PSI.R1	2	3	0	4	6	5	15	20	1	Triploid
2023-PLATE-110_2022-2354_63-Pressure_8500PSI_R1_063	Fam3	8500 PSI	ABB	NA	ABC	ABB	NA	NA	ABC	ABB	ABC	A	ABC	A	AAB	AAB	AAB	A	ABC	ABC	AAB	AAB	NA	8500PSI.R1	3	3	0	5	3	6	14	20	1	Triploid
2023-PLATE-110_2022-2354_64-Pressure_8500PSI_R1_064	Fam1	8500 PSI	ABB	ABC	ABB	ABC	NA	A	AAB	ABB	ABC	AAB	ABC	A	ABC	A	ABC	AAB	ABB	A	ABB	AAB	NA	8500PSI.R1	1	4	0	4	5	6	15	20	1	Triploid
2023-PLATE-110_2022-2354_65-Pressure_8500PSI_R1_065	Fam1	8500 PSI	AAB	ABC	ABB	ABC	NA	NA	AAB	A	ABC	AAB	ABC	A	ABC	AAB	ABB	ABC	ABB	ABC	A	A	NA	8500PSI.R1	2	4	0	4	3	7	14	20	1	Triploid
2023-PLATE-110_2022-2354_66-Pressure_8500PSI_R1_066	Fam1	8500 PSI	ABC	ABC	ABB	ABC	NA	AAB	AAB	ABB	ABB	ABC	ABB	AAB	AAB	AAB	AAB	ABB	ABB	ABB	AAB	AAB	NA	8500PSI.R1	1	0	0	8	7	4	19	20	1	Triploid
2023-PLATE-110_2022-2354_67-Pressure_8500PSI_R1_067	Fam3	8500 PSI	AAB	NA	ABC	ABB	NA	AAB	ABC	ABB	AAB	A	ABC	ABC	ABC	AAB	AAB	AAB	ABC	ABB	AAB	AAB	NA	8500PSI.R1	2	1	0	8	3	6	17	20	1	Triploid
2023-PLATE-110_2022-2354_68-Pressure_8500PSI_R1_068	Fam3	8500 PSI	AAB	NA	ABC	ABB	NA	NA	ABC	A	ABC	AAB	ABC	ABC	ABC	AAB	AAB	AAB	ABC	ABB	ABB	A	NA	8500PSI.R1	3	2	0	5	3	7	15	20	1	Triploid
2023-PLATE-110_2022-2354_69-Pressure_8500PSI_R1_069	Fam1	8500 PSI	AAB	ABC	ABB	ABC	NA	AAB	ABB	ABB	ABB	AAB	ABB	A	AAB	AAB	ABC	AAB	ABB	ABB	A	AAB	NA	8500PSI.R1	1	2	0	7	7	3	17	20	1	Triploid
2023-PLATE-110_2022-2354_70-Pressure_8500PSI_R1_070	Fam2	8500 PSI	AAB	NA	ABC	A	NA	A	ABC	AAB	AAB	AAB	ABB	ABB	AAB	A	AAB	AAB	ABC	ABB	A	A	NA	8500PSI.R1	2	5	0	7	3	3	13	20	1	Triploid
2023-PLATE-110_2022-2354_71-Pressure_8500PSI_R1_071	Fam2	8500 PSI	ABB	NA	ABC	A	NA	AAB	ABC	ABB	ABC	ABB	ABB	AAB	ABC	AAB	ABB	AAB	ABC	A	A	ABB	NA	8500PSI.R1	2	3	0	4	6	5	15	20	1	Triploid
2023-PLATE-110_2022-2354_72-Pressure_8500PSI_R1_072	Fam1	8500 PSI	AAB	NA	ABB	ABC	NA	NA	AAB	ABB	ABB	AAB	ABB	A	AAB	A	ABC	ABC	ABB	ABC	AAB	AAB	NA	8500PSI.R1	3	2	0	6	5	4	15	20	1	Triploid
2023-PLATE-110_2022-2354_73-Pressure_8500PSI_R1_073	Fam2	8500 PSI	ABB	NA	ABB	A	NA	NA	ABC	ABB	A	ABB	ABC	ABC	AAB	AAB	ABB	AAB	ABC	A	AAB	ABB	NA	8500PSI.R1	3	3	0	4	6	4	14	20	1	Triploid
2023-PLATE-110_2022-2354_74-Pressure_8500PSI_R1_074	Fam1	8500 PSI	AAB	ABC	A	ABC	NA	NA	ABB	ABB	AAB	A	ABB	AAB	AAB	A	AAB	AAB	ABB	A	A	AAB	NA	8500PSI.R1	2	5	0	7	4	2	13	20	1	Triploid
2023-PLATE-110_2022-2354_75-Pressure_8500PSI_R1_075	Fam1	8500 PSI	ABB	NA	ABB	ABC	NA	A	ABB	A	ABC	ABC	ABC	AAB	ABC	AAB	ABC	ABC	ABB	ABC	ABB	AAB	NA	8500PSI.R1	2	2	0	3	5	8	16	20	1	Triploid
2023-PLATE-110_2022-2354_76-Pressure_8500PSI_R1_076	Fam2	8500 PSI	ABB	NA	ABB	A	NA	A	ABC	AAB	A	ABB	ABC	ABB	AAB	A	ABB	AAB	ABC	A	ABB	ABB	NA	8500PSI.R1	2	5	0	3	7	3	13	20	1	Triploid
2023-PLATE-110_2022-2354_77-Pressure_8500PSI_R1_077	Fam3	8500 PSI	AAB	ABC	ABC	ABB	NA	A	ABC	ABB	ABC	AAB	ABC	AAB	AAB	A	AAB	AAB	ABC	ABB	AAB	A	NA	8500PSI.R1	1	3	0	7	3	6	16	20	1	Triploid
2023-PLATE-110_2022-2354_78-Pressure_8500PSI_R1_078	Fam3	8500 PSI	ABB	NA	ABC	ABB	NA	A	ABC	ABB	ABC	AAB	ABC	AAB	AAB	AAB	AAB	A	ABC	ABC	ABB	AAB	NA	8500PSI.R1	2	2	0	6	4	6	16	20	1	Triploid
2023-PLATE-110_2022-2354_79-Pressure_8500PSI_R1_079	Fam2	8500 PSI	ABB	ABC	ABB	A	NA	A	ABC	ABB	AAB	AAB	ABB	ABC	AAB	ABB	ABB	AAB	ABC	A	A	A	NA	8500PSI.R1	1	5	0	4	6	4	14	20	1	Triploid
2023-PLATE-110_2022-2354_80-Pressure_8500PSI_R1_080	Fam1	8500 PSI	AAB	NA	ABB	ABC	NA	AAB	ABB	A	ABC	AAB	ABC	A	AAB	AAB	ABC	ABC	ABB	ABC	A	AAB	NA	8500PSI.R1	2	3	0	6	3	6	15	20	1	Triploid
2023-PLATE-110_2022-2354_81-Pressure_8500PSI_R1_081	Fam1	8500 PSI	ABB	NA	A	ABC	NA	A	ABB	ABB	ABB	ABC	ABB	A	ABC	AAB	ABC	AAB	ABB	A	AAB	AAB	NA	8500PSI.R1	2	4	0	4	6	4	14	20	1	Triploid
2023-PLATE-110_2022-2354_82-Pressure_8500PSI_R1_082	Fam3	8500 PSI	AAB	ABC	ABC	ABB	NA	AAB	ABC	ABB	ABC	AAB	ABC	ABB	ABB	A	AAB	AAB	ABC	ABB	AAB	A	NA	8500PSI.R1	1	2	0	6	5	6	17	20	1	Triploid
2023-PLATE-110_2022-2354_83-Pressure_8500PSI_R1_083	Fam3	8500 PSI	ABB	NA	ABC	ABB	NA	AAB	ABC	A	AAB	AAB	ABC	ABC	ABC	AAB	AAB	A	ABC	ABC	AAB	A	bp shift	8500PSI.R1	2	3	0	6	2	7	15	20	1	Triploid
2023-PLATE-110_2022-2354_84-Pressure_8500PSI_R1_084	Fam2	8500 PSI	ABB	NA	A	A	NA	A	ABC	A	ABC	ABB	ABB	ABB	AAB	ABB	AAB	AAB	ABC	A	AAB	A	bp shift	8500PSI.R1	2	6	0	4	5	3	12	20	1	Triploid
2023-PLATE-110_2022-2354_85-Pressure_8500PSI_R1_085	Fam1	8500 PSI	ABB	ABB	A	ABC	NA	A	ABB	A	ABC	AAB	ABC	AAB	ABC	AAB	ABC	ABB	ABB	ABB	A	A	NA	8500PSI.R1	1	5	0	3	6	5	14	20	1	Triploid
2023-PLATE-110_2022-2354_86-Pressure_8500PSI_R1_086	Fam3	8500 PSI	AAB	NA	ABC	ABB	NA	A	ABB	ABB	ABC	AAB	ABC	AAB	A	AAB	AAB	AAB	ABC	A	AAB	A	NA	8500PSI.R1	2	4	0	7	3	4	14	20	1	Triploid
2023-PLATE-110_2022-2354_87-Pressure_8500PSI_R1_087	Fam1	8500 PSI	ABC	NA	ABB	ABC	NA	A	AAB	A	ABB	ABB	ABC	AAB	AAB	AAB	ABC	ABB	ABB	ABB	AAB	A	NA	8500PSI.R1	2	3	0	5	6	4	15	20	1	Triploid
2023-PLATE-110_2022-2354_88-Pressure_8500PSI_R1_088	Fam3	8500 PSI	ABB	NA	ABC	ABB	NA	A	ABC	ABB	ABC	A	ABC	ABC	AAB	AAB	AAB	AAB	ABC	ABB	AAB	AAB	NA	8500PSI.R1	2	2	0	6	4	6	16	20	1	Triploid
2023-PLATE-110_2022-2354_89-Pressure_8500PSI_R1_089	Fam2	8500 PSI	ABB	NA	ABB	A	NA	A	ABC	AAB	ABB	AAB	ABC	ABB	AAB	A	ABB	AAB	ABC	A	AAB	ABC	NA	8500PSI.R1	2	4	0	5	5	4	14	20	1	Triploid
2023-PLATE-110_2022-2354_90-Pressure_8500PSI_R1_090	Fam3	8500 PSI	AAB	NA	ABB	ABB	NA	A	ABC	A	ABC	AAB	ABC	ABC	A	A	AAB	AAB	ABC	ABB	AAB	A	NA	8500PSI.R1	2	5	0	5	3	5	13	20	1	Triploid
2023-PLATE-110_2022-2354_91-Pressure_8500PSI_R1_091	Fam3	8500 PSI	AAB	NA	ABC	ABB	NA	NA	ABC	ABB	ABB	A	ABC	A	ABC	A	AAB	A	ABC	ABC	A	AAB	NA	8500PSI.R1	3	5	0	3	3	6	12	20	1	Triploid
2023-PLATE-110_2022-2354_92-Pressure_8500PSI_R1_092	Fam2	8500 PSI	ABB	NA	AB	A	NA	A	ABC	AAB	ABC	ABB	ABB	ABB	AAB	AAB	ABB	AAB	ABC	A	ABB	A	NA	8500PSI.R1	2	4	1	4	6	3	13	20	0.928571	Aneuploid
2023-PLATE-110_2022-2354_93-Pressure_8500PSI_R1_093	Fam2	8500 PSI	AAB	NA	ABB	A	NA	NA	ABC	AAB	AAB	ABC	ABC	ABC	ABC	A	ABB	AAB	ABC	ABB	AAB	ABB	NA	8500PSI.R1	3	2	0	5	4	6	15	20	1	Triploid
2023-PLATE-110_2022-2354_94-Pressure_8500PSI_R1_094	Fam1	8500 PSI	AB	AB	AB	AB	NA	NA	AB	A	AB	AB	AB	A	A	A	AB	AB	AB	A	AB	A	NA	8500PSI.R1	2	6	12	0	0	0	0	20	0	Diploid
2023-PLATE-110_2022-2354_95-Pressure_8500PSI_R1_095	Fam3	8500 PSI	ABB	NA	ABC	ABB	NA	A	ABB	A	ABC	A	ABC	ABC	A	AAB	AAB	AAB	ABC	ABB	AAB	A	NA	8500PSI.R1	2	5	0	4	4	5	13	20	1	Triploid
2023-PLATE-110_2022-2354_96-Pressure_8500PSI_R1_096	Fam2	8500 PSI	AAB	NA	A	A	NA	NA	ABC	ABB	ABB	ABB	ABC	ABC	ABC	A	ABB	AAB	ABC	ABB	ABB	ABC	NA	8500PSI.R1	3	3	0	2	6	6	14	20	1	Triploid
2023-PLATE-110_2022-2354_97-Pressure_8500PSI_R1_097	Fam3	8500 PSI	AAB	NA	ABC	ABB	NA	NA	ABC	ABB	ABC	AAB	ABC	AAB	ABC	AAB	AAB	AAB	ABC	ABB	ABB	A	NA	8500PSI.R1	3	1	0	6	4	6	16	20	1	Triploid
2023-PLATE-110_2022-2354_98-Pressure_8500PSI_R1_098	Fam1	8500 PSI	AAB	NA	A	ABC	NA	AAB	AAB	A	ABC	ABC	ABC	AAB	AAB	A	ABC	ABB	ABB	ABB	A	AAB	NA	8500PSI.R1	2	4	0	6	3	5	14	20	1	Triploid
2023-PLATE-110_2022-2354_99-Pressure_8500PSI_R1_099	Fam3	8500 PSI	AAB	NA	ABC	ABB	NA	A	ABC	ABB	ABC	AAB	ABC	AAB	AAB	A	AAB	A	ABC	ABC	AAB	AAB	NA	8500PSI.R1	2	3	0	7	2	6	15	20	1	Triploid
2023-PLATE-112_2022-2354_145-Pressure_8500PSI_R2_045	Fam1	8500 PSI	AAB	ABC	ABB	ABC	ABB	A	ABB	A	ABB	AAB	ABC	AAB	ABC	A	ABC	A	ABB	ABB	ABB	AAB	NA	8500PSI.R2	0	4	0	4	7	5	16	20	1	Triploid
2023-PLATE-112_2022-2354_146-Pressure_8500PSI_R2_046	Fam1	8500 PSI	AAB	ABC	A	ABC	ABC	A	ABB	ABB	ABC	AAB	ABC	A	ABC	A	ABC	ABB	ABB	ABB	AAB	AAB	NA	8500PSI.R2	0	4	0	4	5	7	16	20	1	Triploid
2023-PLATE-112_2022-2354_147-Pressure_8500PSI_R2_047	Fam2	8500 PSI	ABB	ABC	ABB	A	ABC	AAB	AAB	AAB	AAB	ABB	AAB	ABB	ABC	A	AAB	AAB	ABC	ABB	AAB	AAB	NA	8500PSI.R2	0	2	0	9	5	4	18	20	1	Triploid
2023-PLATE-112_2022-2354_148-Pressure_8500PSI_R2_048	Fam2	8500 PSI	AAB	ABC	ABB	A	ABC	A	ABC	ABB	ABC	ABB	ABB	A	AAB	ABB	ABB	AAB	ABC	A	A	ABB	NA	8500PSI.R2	0	5	0	3	7	5	15	20	1	Triploid
2023-PLATE-112_2022-2354_149-Pressure_8500PSI_R2_049	Fam1	8500 PSI	AAB	ABC	A	ABC	ABB	AAB	AAB	A	ABB	A	ABC	AAB	AAB	AAB	ABC	ABC	ABB	ABC	A	AAB	NA	8500PSI.R2	0	4	0	7	3	6	16	20	1	Triploid
2023-PLATE-112_2022-2354_150-Pressure_8500PSI_R2_050	Fam1	8500 PSI	ABC	AB	ABB	ABC	ABC	A	AAB	ABB	ABC	ABB	ABC	AAB	ABC	A	ABC	ABC	ABB	ABC	AAB	AAB	NA	8500PSI.R2	0	2	1	4	4	9	17	20	0.944444	Aneuploid
2023-PLATE-112_2022-2354_151-Pressure_8500PSI_R2_051	Fam2	8500 PSI	AAB	ABC	ABB	NA	ABC	A	ABC	A	ABC	ABB	ABB	ABB	AAB	AAB	AAB	AAB	ABC	ABB	A	A	NA	8500PSI.R2	1	4	0	5	5	5	15	20	1	Triploid
2023-PLATE-112_2022-2354_152-Pressure_8500PSI_R2_052	Fam3	8500 PSI	AAB	ABC	AAB	ABB	ABC	A	AAB	A	ABC	AAB	ABC	AAB	AAB	AAB	AAB	AAB	ABC	ABB	AAB	AAB	NA	8500PSI.R2	0	2	0	11	2	5	18	20	1	Triploid
2023-PLATE-112_2022-2354_153-Pressure_8500PSI_R2_053	Fam3	8500 PSI	AAB	ABC	ABC	ABB	ABC	AAB	ABC	ABB	ABC	AAB	ABC	AAB	ABC	A	AAB	A	ABC	ABC	ABB	AAB	NA	8500PSI.R2	0	2	0	6	3	9	18	20	1	Triploid
2023-PLATE-112_2022-2354_154-Pressure_8500PSI_R2_054	Fam3	8500 PSI	AAB	ABC	ABB	ABB	ABC	A	ABC	A	ABB	A	ABC	ABC	AAB	AAB	AAB	AAB	ABC	ABB	AAB	A	NA	8500PSI.R2	0	4	0	6	4	6	16	20	1	Triploid
2023-PLATE-112_2022-2354_155-Pressure_8500PSI_R2_055	Fam3	8500 PSI	ABB	ABC	ABC	ABB	ABC	AAB	AAB	ABB	ABC	AAB	ABC	ABC	ABC	AAB	AAB	A	ABC	ABC	AAB	A	NA	8500PSI.R2	0	2	0	6	3	9	18	20	1	Triploid
2023-PLATE-112_2022-2354_156-Pressure_8500PSI_R2_056	Fam1	8500 PSI	ABB	ABC	ABB	ABC	AAB	A	AAB	A	ABC	AAB	ABC	A	ABC	AAB	ABC	ABB	ABB	ABB	AAB	AAB	NA	8500PSI.R2	0	3	0	6	5	6	17	20	1	Triploid
2023-PLATE-112_2022-2354_157-Pressure_8500PSI_R2_057	Fam3	8500 PSI	ABB	ABC	ABB	ABB	ABC	AAB	ABC	A	ABC	A	ABC	AAB	ABC	A	AAB	AAB	ABC	ABB	A	A	NA	8500PSI.R2	0	5	0	4	4	7	15	20	1	Triploid
2023-PLATE-112_2022-2354_158-Pressure_8500PSI_R2_058	Fam3	8500 PSI	ABB	ABC	ABC	ABB	ABB	AAB	ABC	ABB	ABC	AAB	ABC	ABC	ABC	A	AAB	A	ABC	ABC	AAB	A	NA	8500PSI.R2	0	3	0	4	4	9	17	20	1	Triploid
2023-PLATE-112_2022-2354_159-Pressure_8500PSI_R2_059	Fam3	8500 PSI	ABB	ABC	ABC	ABB	ABC	A	ABC	ABB	ABC	A	ABC	AAB	AAB	AAB	AAB	AAB	ABC	A	AAB	AAB	NA	8500PSI.R2	0	3	0	7	3	7	17	20	1	Triploid
2023-PLATE-112_2022-2354_160-Pressure_8500PSI_R2_060	Fam3	8500 PSI	ABB	ABC	ABC	ABB	ABC	AAB	ABC	ABB	ABB	A	ABC	ABC	ABC	AAB	AAB	A	ABC	AAB	ABB	A	NA	8500PSI.R2	0	3	0	4	5	8	17	20	1	Triploid
2023-PLATE-112_2022-2354_161-Pressure_8500PSI_R2_061	Fam3	8500 PSI	ABB	ABC	ABC	ABB	ABC	AAB	ABC	ABB	ABC	A	ABC	AAB	ABC	A	AAB	AAB	ABC	ABB	ABB	AAB	NA	8500PSI.R2	0	2	0	5	5	8	18	20	1	Triploid
2023-PLATE-112_2022-2354_162-Pressure_8500PSI_R2_062	Fam3	8500 PSI	ABB	ABC	ABC	ABB	ABC	A	ABC	ABB	ABC	AAB	ABC	AAB	AAB	A	AAB	AAB	ABC	A	AAB	AAB	NA	8500PSI.R2	0	3	0	7	3	7	17	20	1	Triploid
2023-PLATE-112_2022-2354_163-Pressure_8500PSI_R2_063	Fam2	8500 PSI	AAB	ABC	ABB	NA	AAB	AAB	ABB	ABB	AAB	ABB	ABC	ABC	ABB	ABB	ABB	AAB	ABC	ABB	A	ABB	NA	8500PSI.R2	1	1	0	5	9	4	18	20	1	Triploid
2023-PLATE-112_2022-2354_164-Pressure_8500PSI_R2_064	Fam2	8500 PSI	ABB	ABC	AAB	NA	ABC	AAB	ABC	AAB	AAB	ABC	ABC	ABC	ABC	A	ABB	AAB	ABC	A	A	ABB	bp shift	8500PSI.R2	1	3	0	5	3	8	16	20	1	Triploid
2023-PLATE-112_2022-2354_165-Pressure_8500PSI_R2_065	Fam1	8500 PSI	ABB	ABC	ABB	ABC	ABC	AAB	AAB	A	ABB	ABC	ABB	A	AAB	AAB	ABC	ABB	ABB	ABB	A	AAB	NA	8500PSI.R2	0	3	0	5	7	5	17	20	1	Triploid
2023-PLATE-112_2022-2354_166-Pressure_8500PSI_R2_066	Fam3	8500 PSI	ABB	ABC	ABC	ABB	ABC	A	ABC	A	ABC	AAB	ABC	ABC	AAB	AAB	AAB	AAB	ABC	ABB	ABB	A	NA	8500PSI.R2	0	3	0	5	4	8	17	20	1	Triploid
2023-PLATE-112_2022-2354_167-Pressure_8500PSI_R2_067	Fam3	8500 PSI	ABB	ABC	ABC	ABB	ABC	A	ABC	A	AAB	AAB	ABC	AAB	AAB	A	AAB	AAB	ABC	A	A	AAB	NA	8500PSI.R2	0	5	0	7	2	6	15	20	1	Triploid
2023-PLATE-112_2022-2354_168-Pressure_8500PSI_R2_068	Fam3	8500 PSI	AAB	ABC	ABC	ABB	ABC	AAB	ABC	A	ABC	AAB	ABC	AAB	ABC	A	AAB	AAB	ABC	ABB	A	A	NA	8500PSI.R2	0	4	0	6	2	8	16	20	1	Triploid
2023-PLATE-112_2022-2354_169-Pressure_8500PSI_R2_069	Fam1	8500 PSI	AAB	ABC	ABB	ABC	ABC	A	ABB	ABB	ABB	AAB	ABC	A	ABB	A	ABC	ABC	ABB	ABC	A	AAB	NA	8500PSI.R2	0	4	0	3	6	7	16	20	1	Triploid
2023-PLATE-112_2022-2354_170-Pressure_8500PSI_R2_070	Fam3	8500 PSI	AAB	ABC	ABC	ABB	ABC	AAB	ABC	ABB	AAB	A	ABC	AAB	ABC	AAB	AAB	A	ABC	AAB	A	AAB	NA	8500PSI.R2	0	3	0	8	2	7	17	20	1	Triploid
2023-PLATE-112_2022-2354_171-Pressure_8500PSI_R2_071	Fam2	8500 PSI	AAB	ABC	ABC	NA	ABB	AAB	ABC	A	AAB	ABB	ABC	ABC	ABC	AAB	ABB	AAB	ABC	ABB	A	ABB	NA	8500PSI.R2	1	2	0	5	5	7	17	20	1	Triploid
2023-PLATE-112_2022-2354_172-Pressure_8500PSI_R2_072	Fam3	8500 PSI	AAB	ABC	ABC	ABB	ABC	A	ABC	ABB	ABC	AAB	ABC	AAB	AAB	AAB	AAB	A	ABC	ABC	AAB	A	NA	8500PSI.R2	0	3	0	7	2	8	17	20	1	Triploid
2023-PLATE-112_2022-2354_173-Pressure_8500PSI_R2_073	Fam2	8500 PSI	AAB	ABC	ABB	NA	ABC	AAB	ABC	ABB	AAB	ABB	A	ABC	ABC	AAB	AAB	AAB	ABC	A	AAB	A	NA	8500PSI.R2	1	3	0	7	3	6	16	20	1	Triploid
2023-PLATE-112_2022-2354_174-Pressure_8500PSI_R2_074	Fam2	8500 PSI	ABB	ABC	ABB	A	AAB	A	ABC	ABB	AAB	A	ABB	ABC	AAB	ABB	AAB	AAB	ABC	A	A	ABC	NA	8500PSI.R2	0	5	0	5	5	5	15	20	1	Triploid
2023-PLATE-112_2022-2354_175-Pressure_8500PSI_R2_075	Fam3	8500 PSI	AAB	ABC	ABC	ABB	ABC	AAB	ABC	ABB	ABC	A	ABC	ABC	ABC	A	AAB	AAB	ABC	AAB	AAB	AAB	NA	8500PSI.R2	0	2	0	7	2	9	18	20	1	Triploid
2023-PLATE-112_2022-2354_176-Pressure_8500PSI_R2_076	Fam1	8500 PSI	AAB	ABC	A	ABC	ABC	AAB	ABB	A	ABC	ABC	ABC	A	AAB	AAB	ABC	ABC	ABB	ABC	AAB	AAB	NA	8500PSI.R2	0	3	0	6	2	9	17	20	1	Triploid
2023-PLATE-112_2022-2354_177-Pressure_8500PSI_R2_077	Fam2	8500 PSI	ABB	ABC	ABC	NA	ABC	A	ABC	A	AAB	ABC	ABC	ABB	AAB	A	AAB	AAB	ABC	ABB	A	ABB	NA	8500PSI.R2	1	4	0	4	4	7	15	20	1	Triploid
2023-PLATE-112_2022-2354_178-Pressure_8500PSI_R2_078	Fam3	8500 PSI	AAB	ABC	ABC	ABB	ABB	AAB	ABB	A	ABB	A	ABC	ABC	ABB	AAB	AAB	AAB	ABC	ABB	AAB	AAB	NA	8500PSI.R2	0	2	0	7	6	5	18	20	1	Triploid
2023-PLATE-112_2022-2354_179-Pressure_8500PSI_R2_079	Fam3	8500 PSI	ABB	ABC	AAB	ABB	ABC	A	ABC	A	ABC	A	ABC	AAB	AAB	AAB	AAB	A	ABC	ABC	ABB	AAB	NA	8500PSI.R2	0	4	0	6	3	7	16	20	1	Triploid
2023-PLATE-112_2022-2354_180-Pressure_8500PSI_R2_080	Fam2	8500 PSI	AAB	ABC	ABC	NA	ABB	A	ABC	A	ABC	ABC	ABB	ABB	AAB	AAB	A	AAB	ABC	A	AAB	ABB	bp shift	8500PSI.R2	1	4	0	5	4	6	15	20	1	Triploid
2023-PLATE-112_2022-2354_181-Pressure_8500PSI_R2_081	Fam1	8500 PSI	ABB	ABC	A	ABC	ABB	A	ABB	ABB	AAB	A	ABB	A	ABC	A	ABC	ABC	ABB	ABC	AAB	A	NA	8500PSI.R2	0	6	0	2	6	6	14	20	1	Triploid
2023-PLATE-112_2022-2354_182-Pressure_8500PSI_R2_082	Fam2	8500 PSI	ABB	ABC	ABC	A	AAB	A	ABC	AAB	AAB	ABB	ABC	ABC	AAB	AAB	A	AAB	ABC	A	AAB	A	NA	8500PSI.R2	0	5	0	7	2	6	15	20	1	Triploid
2023-PLATE-112_2022-2354_183-Pressure_8500PSI_R2_083	Fam3	8500 PSI	ABB	ABC	ABC	ABB	ABC	AAB	ABC	ABB	ABC	A	ABC	AAB	ABB	A	AAB	A	ABC	ABC	AAB	AAB	NA	8500PSI.R2	0	3	0	5	4	8	17	20	1	Triploid
2023-PLATE-112_2022-2354_184-Pressure_8500PSI_R2_084	Fam2	8500 PSI	AAB	ABC	AAB	NA	ABC	AAB	AAB	A	AAB	A	ABB	ABC	ABC	A	ABB	AAB	ABC	ABB	AAB	ABB	NA	8500PSI.R2	1	3	0	7	4	5	16	20	1	Triploid
2023-PLATE-112_2022-2354_185-Pressure_8500PSI_R2_085	Fam3	8500 PSI	ABB	ABC	ABC	ABB	ABC	AAB	ABB	ABB	ABC	AAB	ABC	AAB	ABC	A	AAB	AAB	ABC	ABB	AAB	A	NA	8500PSI.R2	0	2	0	6	5	7	18	20	1	Triploid
2023-PLATE-112_2022-2354_186-Pressure_8500PSI_R2_086	Fam1	8500 PSI	ABC	ABC	ABB	ABC	ABC	A	AAB	A	ABB	ABC	ABB	A	ABB	A	ABC	ABB	ABB	ABB	AAB	AAB	NA	8500PSI.R2	0	4	0	3	7	6	16	20	1	Triploid
2023-PLATE-112_2022-2354_187-Pressure_8500PSI_R2_087	Fam3	8500 PSI	AAB	ABC	ABC	ABB	ABC	A	ABC	A	ABC	AAB	ABC	AAB	AAB	AAB	AAB	A	ABC	ABC	AAB	A	NA	8500PSI.R2	0	4	0	7	1	8	16	20	1	Triploid
2023-PLATE-112_2022-2354_188-Pressure_8500PSI_R2_088	Fam2	8500 PSI	AAB	ABC	ABB	NA	ABC	AAB	ABC	ABB	AAB	ABB	ABC	ABB	ABC	AAB	ABB	AAB	ABC	ABB	A	ABB	NA	8500PSI.R2	1	1	0	5	7	6	18	20	1	Triploid
2023-PLATE-112_2022-2354_189-Pressure_8500PSI_R2_089	Fam1	8500 PSI	AAB	ABC	A	ABC	ABC	AAB	ABB	ABB	ABB	A	ABB	AAB	AAB	AAB	ABC	ABC	ABB	ABC	A	A	NA	8500PSI.R2	0	4	0	5	5	6	16	20	1	Triploid
2023-PLATE-112_2022-2354_190-Pressure_8500PSI_R2_090	Fam2	8500 PSI	AAB	ABB	ABB	NA	ABB	AAB	ABC	ABB	AAB	ABB	ABC	ABB	ABC	A	A	AAB	ABC	ABB	A	ABC	NA	8500PSI.R2	1	3	0	4	7	5	16	20	1	Triploid
2023-PLATE-112_2022-2354_191-Pressure_8500PSI_R2_091	Fam3	8500 PSI	AAB	ABC	ABC	ABB	ABC	AAB	ABC	ABB	ABC	A	ABC	AAB	ABB	A	AAB	AAB	ABC	ABB	AAB	A	NA	8500PSI.R2	0	3	0	6	4	7	17	20	1	Triploid
2023-PLATE-112_2022-2354_192-Pressure_8500PSI_R2_092	Fam3	8500 PSI	ABB	ABC	ABC	ABB	ABC	A	ABC	ABB	ABC	A	ABC	ABC	AAB	A	AAB	AAB	ABC	ABB	ABB	AAB	NA	8500PSI.R2	0	3	0	4	5	8	17	20	1	Triploid
2023-PLATE-112_2022-2354_193-Pressure_8500PSI_R2_093	Fam3	8500 PSI	AAB	ABC	ABC	ABB	ABC	AAB	ABC	A	ABB	A	ABC	AAB	ABC	A	AAB	A	ABC	ABC	AAB	AAB	NA	8500PSI.R2	0	4	0	6	2	8	16	20	1	Triploid
2023-PLATE-112_2022-2354_194-Pressure_8500PSI_R2_094	Fam3	8500 PSI	ABB	ABC	AAB	ABB	ABC	A	ABC	A	AAB	AAB	ABC	AAB	AAB	AAB	AAB	A	ABC	ABC	AAB	AAB	NA	8500PSI.R2	0	3	0	9	2	6	17	20	1	Triploid
2023-PLATE-112_2022-2354_195-Pressure_8500PSI_R2_095	Fam3	8500 PSI	AAB	ABC	ABC	ABB	ABC	AAB	ABB	A	ABC	AAB	ABC	AAB	NA	A	AAB	AAB	ABC	A	AAB	A	NA	8500PSI.R2	1	4	0	7	2	6	15	20	1	Triploid
2023-PLATE-112_2022-2354_196-Pressure_8500PSI_R2_096	Fam1	8500 PSI	AAB	ABC	A	ABC	ABB	A	AAB	ABB	ABB	AAB	ABB	AAB	ABC	A	ABC	AAB	ABB	ABC	AAB	A	NA	8500PSI.R2	0	4	0	6	5	5	16	20	1	Triploid
2023-PLATE-112_2022-2354_197-Pressure_8500PSI_R2_097	Fam2	8500 PSI	ABB	ABC	A	A	ABB	A	ABC	AAB	ABC	ABB	ABB	ABC	AAB	AAB	A	AAB	ABC	ABB	A	A	NA	8500PSI.R2	0	6	0	4	5	5	14	20	1	Triploid
2023-PLATE-112_2022-2354_198-Pressure_8500PSI_R2_098	Fam2	8500 PSI	AAB	ABC	ABB	A	ABC	A	ABC	AAB	AAB	ABB	ABC	A	A	AAB	ABB	AAB	ABC	ABB	AAB	ABB	NA	8500PSI.R2	0	4	0	6	5	5	16	20	1	Triploid
2023-PLATE-112_2022-2354_199-Pressure_8500PSI_R2_099	Fam3	8500 PSI	AAB	ABC	ABC	ABB	ABC	AAB	ABC	ABB	ABC	AAB	ABC	AAB	ABC	A	AAB	AAB	ABC	ABB	A	A	NA	8500PSI.R2	0	3	0	6	3	8	17	20	1	Triploid
2023-PLATE-112_2022-2354_200-Pressure_8500PSI_R2_100	Fam3	8500 PSI	ABB	ABC	ABC	ABB	ABB	AAB	ABC	A	ABC	A	ABC	ABC	ABC	A	AAB	AAB	ABC	ABB	AAB	A	NA	8500PSI.R2	0	4	0	4	4	8	16	20	1	Triploid
2023-PLATE-112_2022-2355_10-Pressure_9500PSI_R1_010	Fam3	9500 PSI	AAB	ABC	ABB	ABB	ABC	A	ABC	A	ABC	A	ABC	ABC	AAB	AAB	AAB	A	ABC	ABC	AAB	A	NA	9500PSI.R1	0	5	0	5	2	8	15	20	1	Triploid
2023-PLATE-112_2022-2355_11-Pressure_9500PSI_R1_011	Fam1	9500 PSI	ABB	ABC	ABB	ABC	ABB	AAB	ABB	A	ABB	ABC	ABB	A	A	A	ABC	ABB	ABB	ABC	AAB	AAB	NA	9500PSI.R1	0	4	0	3	8	5	16	20	1	Triploid
2023-PLATE-112_2022-2355_12-Pressure_9500PSI_R1_012	Fam1	9500 PSI	ABC	ABC	A	ABC	ABB	AAB	AAB	A	AAB	AAB	ABB	AAB	AAB	AAB	ABC	AAB	ABB	A	AAB	AAB	NA	9500PSI.R1	0	3	0	10	3	4	17	20	1	Triploid
2023-PLATE-112_2022-2355_13-Pressure_9500PSI_R1_013	Fam3	9500 PSI	ABB	ABC	ABC	ABB	ABC	AAB	ABB	A	ABC	A	ABC	AAB	ABB	A	AAB	AAB	ABC	ABB	AAB	A	NA	9500PSI.R1	0	4	0	5	5	6	16	20	1	Triploid
2023-PLATE-112_2022-2355_14-Pressure_9500PSI_R1_014	Fam2	9500 PSI	ABB	ABC	ABC	A	ABC	AAB	AAB	ABB	ABB	ABB	ABC	ABC	ABC	AAB	ABB	AAB	ABC	ABB	AAB	ABB	NA	9500PSI.R1	0	1	0	5	7	7	19	20	1	Triploid
2023-PLATE-112_2022-2355_15-Pressure_9500PSI_R1_015	Fam3	9500 PSI	AAB	ABC	ABC	ABB	ABC	AAB	ABC	ABB	ABC	AAB	ABC	ABC	ABC	A	AAB	AAB	ABC	ABB	AAB	A	NA	9500PSI.R1	0	2	0	6	3	9	18	20	1	Triploid
2023-PLATE-112_2022-2355_16-Pressure_9500PSI_R1_016	Fam3	9500 PSI	NA	ABC	ABC	ABB	ABC	AAB	ABC	ABB	ABC	AAB	ABC	AAB	ABC	A	AAB	A	ABC	ABC	AAB	A	NA	9500PSI.R1	1	3	0	5	2	9	16	20	1	Triploid
2023-PLATE-112_2022-2355_17-Pressure_9500PSI_R1_017	Fam3	9500 PSI	ABB	ABC	ABC	ABB	ABC	A	ABC	ABB	ABC	A	ABC	AAB	AAB	AAB	AAB	AAB	ABC	ABB	AAB	A	NA	9500PSI.R1	0	3	0	6	4	7	17	20	1	Triploid
2023-PLATE-112_2022-2355_18-Pressure_9500PSI_R1_018	Fam1	9500 PSI	ABC	ABC	A	ABC	ABC	A	ABB	ABB	ABB	ABB	ABC	A	ABC	AAB	ABC	ABB	ABB	ABC	AAB	A	NA	9500PSI.R1	0	4	0	2	6	8	16	20	1	Triploid
2023-PLATE-112_2022-2355_19-Pressure_9500PSI_R1_019	Fam1	9500 PSI	AAB	ABC	ABB	ABC	ABC	AAB	AAB	ABB	ABC	ABC	ABC	AAB	AAB	AAB	ABC	ABB	ABB	AAB	ABB	A	NA	9500PSI.R1	0	1	0	7	5	7	19	20	1	Triploid
2023-PLATE-112_2022-2355_1-Pressure_9500PSI_R1_001	Fam1	9500 PSI	AAB	ABC	A	ABC	ABB	AAB	AAB	A	ABC	AAB	ABC	A	A	AAB	ABC	AAB	ABB	ABC	AAB	AAB	NA	9500PSI.R1	0	4	0	8	2	6	16	20	1	Triploid
2023-PLATE-112_2022-2355_20-Pressure_9500PSI_R1_020	Fam3	9500 PSI	ABB	ABB	ABC	ABB	ABC	A	ABC	ABB	ABC	AAB	ABC	AAB	AAB	A	AAB	A	ABC	ABC	AAB	AAB	NA	9500PSI.R1	0	3	0	6	4	7	17	20	1	Triploid
2023-PLATE-112_2022-2355_21-Pressure_9500PSI_R1_021	Fam2	9500 PSI	AAB	ABC	ABC	A	ABB	A	ABC	A	AAB	ABB	ABC	ABB	AAB	ABB	ABB	AAB	ABC	A	AAB	A	NA	9500PSI.R1	0	5	0	5	5	5	15	20	1	Triploid
2023-PLATE-112_2022-2355_22-Pressure_9500PSI_R1_022	Fam2	9500 PSI	AAB	ABC	ABB	A	ABC	A	ABC	ABB	AAB	ABB	ABC	ABB	AAB	A	A	AAB	ABC	ABB	AAB	AAB	NA	9500PSI.R1	0	4	0	6	5	5	16	20	1	Triploid
2023-PLATE-112_2022-2355_23-Pressure_9500PSI_R1_023	Fam2	9500 PSI	ABB	ABC	ABB	A	ABC	AAB	ABC	AAB	A	ABB	ABC	ABB	ABC	A	A	AAB	ABC	ABB	ABB	ABB	NA	9500PSI.R1	0	4	0	3	7	6	16	20	1	Triploid
2023-PLATE-112_2022-2355_24-Pressure_9500PSI_R1_024	Fam3	9500 PSI	AAB	ABC	ABC	ABB	ABC	A	ABC	A	ABC	AAB	ABC	AAB	AAB	A	AAB	AAB	ABC	ABB	AAB	AAB	NA	9500PSI.R1	0	3	0	8	2	7	17	20	1	Triploid
2023-PLATE-112_2022-2355_25-Pressure_9500PSI_R1_025	Fam2	9500 PSI	AAB	ABC	ABB	A	ABC	AAB	ABC	ABB	ABC	ABB	ABB	ABB	ABC	AAB	AAB	AAB	ABC	A	AAB	ABB	NA	9500PSI.R1	0	2	0	6	6	6	18	20	1	Triploid
2023-PLATE-112_2022-2355_26-Pressure_9500PSI_R1_026	Fam1	9500 PSI	AAB	ABC	A	ABC	ABC	AAB	ABB	ABB	ABC	AAB	ABC	AAB	AAB	AAB	ABC	ABB	ABB	ABB	ABB	A	NA	9500PSI.R1	0	2	0	6	6	6	18	20	1	Triploid
2023-PLATE-112_2022-2355_27-Pressure_9500PSI_R1_027	Fam1	9500 PSI	ABB	ABC	ABB	ABC	ABC	AAB	AAB	ABB	ABB	AAB	ABC	AAB	AAB	A	AAB	ABB	ABB	ABC	AAB	AAB	NA	9500PSI.R1	0	1	0	8	6	5	19	20	1	Triploid
2023-PLATE-112_2022-2355_28-Pressure_9500PSI_R1_028	Fam2	9500 PSI	AAB	ABC	ABC	NA	ABC	A	ABC	AAB	ABC	ABC	ABB	AAB	AAB	A	ABB	AAB	ABC	A	A	ABB	NA	9500PSI.R1	1	4	0	5	3	7	15	20	1	Triploid
2023-PLATE-112_2022-2355_29-Pressure_9500PSI_R1_029	Fam1	9500 PSI	ABC	ABC	A	ABC	ABC	A	ABB	ABB	AAB	AAB	ABB	A	ABC	A	ABC	AAB	ABB	A	ABB	A	NA	9500PSI.R1	0	6	0	3	5	6	14	20	1	Triploid
2023-PLATE-112_2022-2355_2-Pressure_9500PSI_R1_002	Fam2	9500 PSI	ABB	ABC	ABC	NA	ABC	AAB	ABC	AAB	AAB	ABC	ABC	ABC	ABB	AAB	ABB	AAB	ABC	ABB	AAB	ABC	NA	9500PSI.R1	1	0	0	6	4	9	19	20	1	Triploid
2023-PLATE-112_2022-2355_30-Pressure_9500PSI_R1_030	Fam2	9500 PSI	AAB	ABC	ABB	A	ABC	AAB	ABC	ABB	A	ABB	ABC	ABC	ABC	AAB	AAB	AAB	ABC	A	AAB	ABB	NA	9500PSI.R1	0	3	0	6	4	7	17	20	1	Triploid
2023-PLATE-112_2022-2355_31-Pressure_9500PSI_R1_031	Fam2	9500 PSI	ABB	ABC	ABC	A	ABC	A	ABC	ABB	AAB	A	ABB	ABC	AAB	ABB	AAB	AAB	ABC	A	AAB	A	NA	9500PSI.R1	0	5	0	5	4	6	15	20	1	Triploid
2023-PLATE-112_2022-2355_32-Pressure_9500PSI_R1_032	Fam1	9500 PSI	AAB	ABC	ABB	ABC	AAB	AAB	ABB	ABB	ABB	ABB	ABB	A	AAB	A	ABC	AAB	ABB	A	AAB	AAB	NA	9500PSI.R1	0	3	0	7	7	3	17	20	1	Triploid
2023-PLATE-112_2022-2355_33-Pressure_9500PSI_R1_033	Fam2	9500 PSI	ABB	ABC	ABC	A	ABC	AAB	ABC	ABB	AAB	ABC	ABC	ABC	ABC	A	A	AAB	ABC	A	AAB	ABB	NA	9500PSI.R1	0	4	0	4	3	9	16	20	1	Triploid
2023-PLATE-112_2022-2355_34-Pressure_9500PSI_R1_034	Fam1	9500 PSI	ABC	ABC	A	ABC	ABB	AAB	ABB	ABB	ABB	ABC	ABB	AAB	AAB	AAB	ABC	ABC	ABB	ABC	AAB	AAB	NA	9500PSI.R1	0	1	0	6	6	7	19	20	1	Triploid
2023-PLATE-112_2022-2355_35-Pressure_9500PSI_R1_035	Fam1	9500 PSI	ABB	ABC	A	ABC	ABB	A	AAB	A	ABB	ABC	ABB	A	ABC	AAB	ABC	ABB	ABB	ABB	ABB	AAB	NA	9500PSI.R1	0	4	0	3	8	5	16	20	1	Triploid
2023-PLATE-112_2022-2355_36-Pressure_9500PSI_R1_036	Fam2	9500 PSI	AAB	ABC	ABC	A	AAB	AAB	ABC	A	ABC	ABB	ABB	ABB	ABC	AAB	ABB	AAB	ABC	A	ABB	AAB	NA	9500PSI.R1	0	3	0	6	5	6	17	20	1	Triploid
2023-PLATE-112_2022-2355_37-Pressure_9500PSI_R1_037	Fam3	9500 PSI	ABB	ABC	ABC	ABB	ABB	A	AAB	ABB	ABB	NA	ABB	ABC	AAB	A	AAB	A	ABC	ABC	AAB	A	NA	9500PSI.R1	1	4	0	4	6	5	15	20	1	Triploid
2023-PLATE-112_2022-2355_38-Pressure_9500PSI_R1_038	Fam2	9500 PSI	ABB	ABC	ABB	A	ABC	AAB	ABC	AAB	AAB	ABB	ABB	ABC	ABB	AAB	A	AAB	ABC	A	AAB	A	NA	9500PSI.R1	0	4	0	6	5	5	16	20	1	Triploid
2023-PLATE-112_2022-2355_3-Pressure_9500PSI_R1_003	Fam3	9500 PSI	ABB	ABC	ABC	ABB	ABC	AAB	ABC	ABB	ABC	A	ABC	AAB	ABC	AAB	AAB	AAB	ABC	ABB	ABB	AAB	NA	9500PSI.R1	0	1	0	6	5	8	19	20	1	Triploid
2023-PLATE-112_2022-2355_4-Pressure_9500PSI_R1_004	Fam2	9500 PSI	AAB	ABC	ABB	A	ABB	A	ABC	ABB	ABB	ABB	ABB	ABC	ABB	AAB	ABB	AAB	ABC	ABB	AAB	ABB	NA	9500PSI.R1	0	2	0	4	10	4	18	20	1	Triploid
2023-PLATE-112_2022-2355_5-Pressure_9500PSI_R1_005	Fam1	9500 PSI	ABC	ABC	ABB	ABC	ABC	AAB	AAB	ABB	ABB	ABC	ABB	AAB	AAB	AAB	ABC	ABC	ABB	ABC	A	A	NA	9500PSI.R1	0	2	0	5	5	8	18	20	1	Triploid
2023-PLATE-112_2022-2355_6-Pressure_9500PSI_R1_006	Fam3	9500 PSI	ABB	ABC	ABC	ABB	ABC	AAB	ABC	ABB	ABC	AAB	ABC	AAB	ABB	A	AAB	AAB	ABC	ABB	A	A	NA	9500PSI.R1	0	3	0	5	5	7	17	20	1	Triploid
2023-PLATE-112_2022-2355_7-Pressure_9500PSI_R1_007	Fam1	9500 PSI	ABB	ABC	ABB	ABC	ABC	AAB	AAB	A	AAB	AAB	ABB	AAB	AAB	A	AAB	ABC	ABB	ABC	AAB	AAB	NA	9500PSI.R1	0	2	0	9	4	5	18	20	1	Triploid
2023-PLATE-112_2022-2355_8-Pressure_9500PSI_R1_008	Fam1	9500 PSI	AAB	ABC	A	ABC	ABC	A	ABB	ABB	ABC	ABC	ABC	A	ABC	AAB	ABC	ABB	ABB	ABB	A	AAB	NA	9500PSI.R1	0	4	0	3	5	8	16	20	1	Triploid
2023-PLATE-112_2022-2355_9-Pressure_9500PSI_R1_009	Fam1	9500 PSI	ABB	ABC	A	ABC	ABB	AAB	AAB	A	AAB	AAB	ABB	AAB	AAB	AAB	AB	ABB	ABB	AAB	AAB	AAB	NA	9500PSI.R1	0	2	1	10	5	2	17	20	0.944444	Aneuploid
2023-PLATE-113_2022-2355_100-Pressure_9500PSI_R1_100	Fam3	9500 PSI	AAB	ABC	AAB	ABB	ABC	A	ABC	ABB	AAB	AAB	ABC	ABC	AAB	AAB	AAB	AAB	ABC	ABB	AAB	A	NA	9500PSI.R1	0	2	0	9	3	6	18	20	1	Triploid
2023-PLATE-113_2022-2355_101-Pressure_9500PSI_R1_101	Fam2	9500 PSI	AAB	ABC	ABC	A	ABC	A	AAB	AAB	ABC	ABB	ABB	ABB	ABB	AAB	A	AAB	ABC	ABB	AAB	ABB	NA	9500PSI.R1	0	3	0	6	6	5	17	20	1	Triploid
2023-PLATE-113_2022-2355_102-Pressure_9500PSI_R1_102	Fam3	9500 PSI	ABB	ABC	ABC	NA	ABC	A	ABB	A	ABC	A	ABC	AAB	AAB	AAB	AAB	A	ABC	ABC	A	AAB	NA	9500PSI.R1	1	5	0	5	2	7	14	20	1	Triploid
2023-PLATE-113_2022-2355_103-Pressure_9500PSI_R1_103	Fam1	9500 PSI	ABB	ABC	A	ABC	ABC	AAB	ABB	ABB	ABB	ABB	ABC	AAB	AAB	AAB	ABC	ABB	ABB	ABB	ABB	AAB	NA	9500PSI.R1	0	1	0	5	9	5	19	20	1	Triploid
2023-PLATE-113_2022-2355_104-Pressure_9500PSI_R1_104	Fam2	9500 PSI	AAB	ABC	ABB	A	AAB	A	ABC	ABB	ABC	ABB	ABB	ABB	AAB	A	A	AAB	ABC	ABB	AAB	AAB	NA	9500PSI.R1	0	4	0	6	6	4	16	20	1	Triploid
2023-PLATE-113_2022-2355_105-Pressure_9500PSI_R1_105	Fam1	9500 PSI	ABC	ABC	ABB	ABC	ABC	AAB	ABB	A	ABB	AAB	ABC	A	AAB	AAB	ABC	ABB	ABB	ABB	AAB	A	NA	9500PSI.R1	0	3	0	5	6	6	17	20	1	Triploid
2023-PLATE-113_2022-2355_106-Pressure_9500PSI_R1_106	Fam2	9500 PSI	AAB	ABC	ABB	NA	ABC	AAB	ABC	AAB	AAB	ABB	ABB	ABC	ABB	AAB	ABB	AAB	ABC	A	ABB	ABB	NA	9500PSI.R1	1	1	0	6	7	5	18	20	1	Triploid
2023-PLATE-113_2022-2355_107-Pressure_9500PSI_R1_107	Fam3	9500 PSI	ABB	ABC	ABC	ABB	ABC	AAB	ABC	A	ABB	A	ABC	ABC	ABB	A	AAB	AAB	ABC	ABB	AAB	AAB	NA	9500PSI.R1	0	3	0	5	5	7	17	20	1	Triploid
2023-PLATE-113_2022-2355_108-Pressure_9500PSI_R1_108	Fam2	9500 PSI	AAB	ABC	AAB	NA	ABC	A	ABC	ABB	AAB	ABC	ABC	ABC	AAB	AAB	A	AAB	ABC	ABB	AAB	ABB	NA	9500PSI.R1	1	2	0	7	3	7	17	20	1	Triploid
2023-PLATE-113_2022-2355_109-Pressure_9500PSI_R1_109	Fam1	9500 PSI	AAB	ABC	ABB	ABC	ABB	A	ABB	A	ABC	AAB	ABC	A	ABC	A	ABC	ABB	ABB	ABB	A	A	NA	9500PSI.R1	0	6	0	2	6	6	14	20	1	Triploid
2023-PLATE-113_2022-2355_110-Pressure_9500PSI_R1_110	Fam2	9500 PSI	ABB	ABC	ABB	NA	ABC	AAB	ABC	AAB	AAB	ABB	ABC	A	ABC	AAB	ABB	AAB	ABC	A	AAB	ABB	NA	9500PSI.R1	1	2	0	6	5	6	17	20	1	Triploid
2023-PLATE-113_2022-2355_111-Pressure_9500PSI_R1_111	Fam3	9500 PSI	AAB	ABC	ABC	ABB	ABC	AAB	ABC	ABB	ABC	A	ABC	ABC	ABC	AAB	AAB	AAB	ABC	ABB	ABB	AAB	NA	9500PSI.R1	0	1	0	6	4	9	19	20	1	Triploid
2023-PLATE-113_2022-2355_112-Pressure_9500PSI_R1_112	Fam1	9500 PSI	ABC	ABC	ABB	ABC	AAB	AAB	AAB	A	ABB	ABC	ABB	A	AAB	AAB	ABC	ABB	ABB	ABB	A	AAB	NA	9500PSI.R1	0	3	0	6	6	5	17	20	1	Triploid
2023-PLATE-113_2022-2355_113-Pressure_9500PSI_R1_113	Fam1	9500 PSI	ABC	ABB	ABB	ABC	ABB	AAB	AAB	A	ABC	AAB	ABC	AAB	AAB	A	ABC	ABB	ABB	ABB	A	A	NA	9500PSI.R1	0	4	0	5	6	5	16	20	1	Triploid
2023-PLATE-113_2022-2355_114-Pressure_9500PSI_R1_114	Fam3	9500 PSI	ABB	ABC	ABC	ABB	ABC	A	ABC	ABB	ABC	A	ABC	AAB	AAB	AAB	AAB	AAB	ABC	ABB	AAB	AAB	NA	9500PSI.R1	0	2	0	7	4	7	18	20	1	Triploid
2023-PLATE-113_2022-2355_115-Pressure_9500PSI_R1_115	Fam1	9500 PSI	ABB	ABC	A	ABC	ABB	AAB	ABB	ABB	ABB	ABB	ABC	A	AAB	A	ABC	ABB	ABB	ABB	ABB	AAB	NA	9500PSI.R1	0	3	0	3	10	4	17	20	1	Triploid
2023-PLATE-113_2022-2355_116-Pressure_9500PSI_R1_116	Fam3	9500 PSI	AAB	ABC	ABC	ABB	ABC	AAB	ABC	A	AAB	AAB	ABC	ABC	ABC	A	AAB	A	ABC	ABC	AAB	A	NA	9500PSI.R1	0	4	0	6	1	9	16	20	1	Triploid
2023-PLATE-113_2022-2355_117-Pressure_9500PSI_R1_117	Fam2	9500 PSI	ABB	ABC	ABC	NA	ABC	A	AAB	ABB	AAB	ABB	ABC	A	AAB	AAB	ABB	AAB	ABC	ABB	ABB	A	NA	9500PSI.R1	1	3	0	5	6	5	16	20	1	Triploid
2023-PLATE-113_2022-2355_118-Pressure_9500PSI_R1_118	Fam3	9500 PSI	ABB	ABC	ABC	ABB	ABC	AAB	ABC	ABB	ABC	A	ABC	ABC	ABC	AAB	AAB	AAB	ABC	AAB	AAB	A	NA	9500PSI.R1	0	2	0	6	3	9	18	20	1	Triploid
2023-PLATE-113_2022-2355_119-Pressure_9500PSI_R1_119	Fam2	9500 PSI	AAB	ABC	ABB	A	ABC	A	ABC	ABB	ABC	ABB	ABB	ABC	AAB	AAB	A	AAB	ABC	ABB	AAB	ABB	NA	9500PSI.R1	0	3	0	5	6	6	17	20	1	Triploid
2023-PLATE-113_2022-2355_120-Pressure_9500PSI_R1_120	Fam1	9500 PSI	ABB	ABC	A	ABC	ABB	A	ABB	ABB	AAB	AAB	ABB	A	ABC	AAB	NA	ABB	ABB	NA	AAB	AAB	NA	9500PSI.R1	2	3	0	5	7	3	15	20	1	Triploid
2023-PLATE-113_2022-2355_121-Pressure_9500PSI_R1_121	Fam2	9500 PSI	AAB	ABC	ABB	NA	ABC	A	AAB	AAB	ABC	ABB	ABB	AAB	AAB	ABB	ABB	AAB	ABC	A	AAB	AAB	NA	9500PSI.R1	1	2	0	8	5	4	17	20	1	Triploid
2023-PLATE-113_2022-2355_122-Pressure_9500PSI_R1_122	Fam2	9500 PSI	AAB	ABC	ABB	NA	ABC	AAB	ABC	A	ABC	ABC	ABB	ABB	ABC	A	ABB	AAB	ABC	A	A	AAB	NA	9500PSI.R1	1	4	0	4	4	7	15	20	1	Triploid
2023-PLATE-113_2022-2355_123-Pressure_9500PSI_R1_123	Fam1	9500 PSI	ABC	ABC	A	ABC	ABB	AAB	ABB	A	ABB	ABC	ABB	AAB	AAB	A	ABC	AAB	ABB	A	AAB	A	NA	9500PSI.R1	0	5	0	5	5	5	15	20	1	Triploid
2023-PLATE-113_2022-2355_124-Pressure_9500PSI_R1_124	Fam3	9500 PSI	ABB	ABC	ABC	ABB	ABC	AAB	ABC	A	ABB	A	ABC	AAB	ABC	A	AAB	A	ABC	ABC	AAB	AAB	NA	9500PSI.R1	0	4	0	5	3	8	16	20	1	Triploid
2023-PLATE-113_2022-2355_125-Pressure_9500PSI_R1_125	Fam2	9500 PSI	ABB	ABC	ABC	NA	ABC	A	ABC	A	ABC	ABC	ABB	ABB	AAB	AAB	ABB	AAB	ABC	A	ABB	ABB	NA	9500PSI.R1	1	3	0	3	6	7	16	20	1	Triploid
2023-PLATE-113_2022-2355_126-Pressure_9500PSI_R2_001	Fam1	9500 PSI	ABC	ABC	A	ABC	ABC	A	ABB	A	ABB	ABC	ABB	A	ABB	A	ABC	ABC	ABB	ABC	ABB	AAB	NA	9500PSI.R2	0	5	0	1	6	8	15	20	1	Triploid
2023-PLATE-113_2022-2355_127-Pressure_9500PSI_R2_002	Fam3	9500 PSI	ABB	ABC	ABC	ABB	ABC	A	ABC	A	ABC	AAB	ABC	AAB	AAB	A	AAB	AAB	ABC	ABB	A	A	NA	9500PSI.R2	0	5	0	5	3	7	15	20	1	Triploid
2023-PLATE-113_2022-2355_128-Pressure_9500PSI_R2_003	Fam1	9500 PSI	ABC	ABC	ABB	ABC	ABB	AAB	ABB	ABB	A	AAB	ABB	A	AAB	A	ABB	ABC	ABB	ABC	AAB	A	NA	9500PSI.R2	0	4	0	4	7	5	16	20	1	Triploid
2023-PLATE-113_2022-2355_129-Pressure_9500PSI_R2_004	Fam1	9500 PSI	AAB	ABC	ABB	ABC	ABC	AAB	AAB	ABB	ABB	ABC	ABB	A	AAB	AAB	ABC	ABC	ABB	ABC	AAB	AAB	NA	9500PSI.R2	0	1	0	7	5	7	19	20	1	Triploid
2023-PLATE-113_2022-2355_130-Pressure_9500PSI_R2_005	Fam2	9500 PSI	AAB	ABC	ABC	NA	ABC	A	ABC	AAB	A	A	ABC	ABB	AAB	ABB	ABB	AAB	ABC	ABB	A	AAB	NA	9500PSI.R2	1	4	0	5	4	6	15	20	1	Triploid
2023-PLATE-113_2022-2355_131-Pressure_9500PSI_R2_006	Fam2	9500 PSI	ABB	ABC	ABC	NA	ABC	A	ABC	NA	AAB	ABC	ABC	ABB	A	A	AAB	AAB	ABC	ABB	A	AAB	NA	9500PSI.R2	2	4	0	4	3	7	14	20	1	Triploid
2023-PLATE-113_2022-2355_132-Pressure_9500PSI_R2_007	Fam2	9500 PSI	ABB	ABC	ABC	A	ABC	AAB	ABB	ABB	ABC	ABB	ABB	ABB	ABC	ABB	ABB	AAB	ABC	A	A	ABB	NA	9500PSI.R2	0	3	0	2	9	6	17	20	1	Triploid
2023-PLATE-113_2022-2355_39-Pressure_9500PSI_R1_039	Fam3	9500 PSI	AAB	ABC	ABC	ABB	ABC	A	ABB	ABB	ABC	A	ABC	ABC	AAB	AAB	AAB	AAB	ABC	ABB	A	AAB	NA	9500PSI.R1	0	3	0	6	4	7	17	20	1	Triploid
2023-PLATE-113_2022-2355_40-Pressure_9500PSI_R1_040	Fam2	9500 PSI	AAB	ABC	ABB	A	AAB	A	ABC	AAB	ABC	ABB	ABB	ABB	ABB	ABB	ABB	AAB	ABC	ABB	A	ABB	NA	9500PSI.R1	0	3	0	4	9	4	17	20	1	Triploid
2023-PLATE-113_2022-2355_41-Pressure_9500PSI_R1_041	Fam1	9500 PSI	AAB	ABC	A	ABC	AAB	A	AAB	A	ABC	AAB	ABC	A	ABC	A	ABC	ABC	ABB	ABC	A	AAB	NA	9500PSI.R1	0	6	0	5	1	8	14	20	1	Triploid
2023-PLATE-113_2022-2355_42-Pressure_9500PSI_R1_042	Fam3	9500 PSI	AAB	ABC	ABC	ABB	ABC	AAB	ABC	A	AAB	AAB	ABC	ABC	ABC	A	AAB	AAB	ABC	ABB	AAB	AAB	NA	9500PSI.R1	0	2	0	8	2	8	18	20	1	Triploid
2023-PLATE-113_2022-2355_43-Pressure_9500PSI_R1_043	Fam2	9500 PSI	ABB	ABC	ABB	NA	ABC	AAB	ABC	ABB	AAB	ABC	ABC	ABC	ABC	ABB	AAB	AAB	ABC	A	A	ABB	NA	9500PSI.R1	1	2	0	4	5	8	17	20	1	Triploid
2023-PLATE-113_2022-2355_44-Pressure_9500PSI_R1_044	Fam1	9500 PSI	AAB	ABC	ABB	ABC	AAB	A	ABB	ABB	ABB	ABB	ABC	A	ABC	AAB	ABC	AAB	ABB	ABB	AAB	A	NA	9500PSI.R1	0	3	0	5	7	5	17	20	1	Triploid
2023-PLATE-113_2022-2355_45-Pressure_9500PSI_R1_045	Fam3	9500 PSI	AAB	ABC	ABC	ABB	ABC	AAB	ABC	A	ABC	A	ABC	ABC	ABC	A	AAB	A	ABC	ABC	AAB	A	NA	9500PSI.R1	0	5	0	4	1	10	15	20	1	Triploid
2023-PLATE-113_2022-2355_46-Pressure_9500PSI_R1_046	Fam3	9500 PSI	AAB	ABC	ABC	ABB	ABC	AAB	ABC	A	ABB	A	ABC	AAB	ABC	A	AAB	AAB	ABC	AAB	A	AAB	NA	9500PSI.R1	0	4	0	7	2	7	16	20	1	Triploid
2023-PLATE-113_2022-2355_47-Pressure_9500PSI_R1_047	Fam3	9500 PSI	ABB	ABC	ABC	ABB	ABC	A	ABC	ABB	ABC	A	ABC	AAB	AAB	AAB	AAB	A	ABC	ABC	ABB	A	NA	9500PSI.R1	0	4	0	4	4	8	16	20	1	Triploid
2023-PLATE-113_2022-2355_48-Pressure_9500PSI_R1_048	Fam3	9500 PSI	ABB	ABC	ABC	ABB	ABC	AAB	ABC	A	ABB	A	ABC	ABC	ABB	A	AAB	A	ABC	ABC	AAB	A	NA	9500PSI.R1	0	5	0	3	4	8	15	20	1	Triploid
2023-PLATE-113_2022-2355_49-Pressure_9500PSI_R1_049	Fam1	9500 PSI	ABC	ABC	A	ABC	ABB	AAB	ABB	A	ABB	A	ABB	A	AAB	AAB	ABB	ABC	ABB	ABC	AAB	A	NA	9500PSI.R1	0	5	0	4	6	5	15	20	1	Triploid
2023-PLATE-113_2022-2355_50-Pressure_9500PSI_R1_050	Fam3	9500 PSI	ABB	ABC	ABC	ABB	ABC	AAB	ABC	A	ABC	A	ABC	AAB	ABC	AAB	AAB	AAB	ABC	ABB	AAB	AAB	NA	9500PSI.R1	0	2	0	7	3	8	18	20	1	Triploid
2023-PLATE-113_2022-2355_51-Pressure_9500PSI_R1_051	Fam2	9500 PSI	AAB	ABB	ABB	A	ABC	A	ABC	ABB	A	A	ABC	ABB	AAB	A	AAB	AAB	ABC	ABB	ABB	ABB	NA	9500PSI.R1	0	5	0	4	7	4	15	20	1	Triploid
2023-PLATE-113_2022-2355_52-Pressure_9500PSI_R1_052	Fam2	9500 PSI	ABC	ABC	ABB	NA	ABC	AAB	ABC	ABB	ABC	A	ABB	ABB	ABC	A	ABB	AAB	ABC	A	A	ABB	bp shift	9500PSI.R1	1	4	0	2	6	7	15	20	1	Triploid
2023-PLATE-113_2022-2355_53-Pressure_9500PSI_R1_053	Fam1	9500 PSI	ABC	ABC	ABB	ABC	ABB	A	AAB	ABB	ABC	AAB	ABC	A	ABC	A	ABC	ABB	ABB	ABB	ABB	A	NA	9500PSI.R1	0	4	0	2	7	7	16	20	1	Triploid
2023-PLATE-113_2022-2355_54-Pressure_9500PSI_R1_054	Fam2	9500 PSI	AAB	ABC	ABC	A	ABC	A	ABC	AAB	AAB	ABC	ABC	ABB	AAB	AAB	ABB	AAB	ABC	ABB	ABB	ABC	NA	9500PSI.R1	0	2	0	6	4	8	18	20	1	Triploid
2023-PLATE-113_2022-2355_56-Pressure_9500PSI_R1_056	Fam3	9500 PSI	AAB	ABC	ABC	ABB	ABC	A	ABC	A	ABC	AAB	ABC	AAB	AAB	AAB	AAB	A	ABC	ABC	AAB	AAB	NA	9500PSI.R1	0	3	0	8	1	8	17	20	1	Triploid
2023-PLATE-113_2022-2355_57-Pressure_9500PSI_R1_057	Fam1	9500 PSI	ABC	ABC	A	ABC	ABB	AAB	ABB	A	ABC	A	ABC	AAB	AAB	AAB	ABC	ABB	ABB	ABB	AAB	A	NA	9500PSI.R1	0	4	0	5	5	6	16	20	1	Triploid
2023-PLATE-113_2022-2355_58-Pressure_9500PSI_R1_058	Fam3	9500 PSI	AAB	ABC	ABC	ABB	ABC	A	ABC	ABB	AAB	AAB	ABC	AAB	AAB	A	AAB	AAB	ABC	ABB	AAB	A	NA	9500PSI.R1	0	3	0	8	3	6	17	20	1	Triploid
2023-PLATE-113_2022-2355_59-Pressure_9500PSI_R1_059	Fam2	9500 PSI	ABB	ABC	ABC	NA	AAB	AAB	ABC	ABB	ABC	ABB	ABB	A	ABB	ABB	ABB	AAB	ABC	A	AAB	ABB	NA	9500PSI.R1	1	2	0	4	8	5	17	20	1	Triploid
2023-PLATE-113_2022-2355_60-Pressure_9500PSI_R1_060	Fam1	9500 PSI	ABC	ABC	A	ABC	ABC	A	AAB	ABB	ABB	ABB	ABB	AAB	ABC	A	ABC	ABC	ABB	ABC	AAB	AAB	NA	9500PSI.R1	0	3	0	4	5	8	17	20	1	Triploid
2023-PLATE-113_2022-2355_61-Pressure_9500PSI_R1_061	Fam3	9500 PSI	AAB	ABC	ABC	ABB	ABC	A	AAB	ABB	ABC	AAB	ABC	ABC	AAB	A	AAB	A	ABC	AAB	AAB	AAB	NA	9500PSI.R1	0	3	0	8	2	7	17	20	1	Triploid
2023-PLATE-113_2022-2355_62-Pressure_9500PSI_R1_062	Fam2	9500 PSI	AAB	ABC	ABC	NA	AAB	A	ABC	ABB	AAB	ABC	ABC	ABC	AAB	ABB	AAB	AAB	ABC	A	A	ABB	NA	9500PSI.R1	1	3	0	6	3	7	16	20	1	Triploid
2023-PLATE-113_2022-2355_63-Pressure_9500PSI_R1_063	Fam2	9500 PSI	ABB	ABC	ABC	NA	ABC	AAB	ABC	ABB	AAB	ABB	ABC	ABC	ABC	AAB	ABB	AAB	ABC	ABB	AAB	AAB	NA	9500PSI.R1	1	0	0	6	5	8	19	20	1	Triploid
2023-PLATE-113_2022-2355_64-Pressure_9500PSI_R1_064	Fam3	9500 PSI	AAB	ABC	ABC	ABB	ABC	AAB	ABC	ABB	ABC	A	ABC	ABC	ABC	AAB	AAB	A	ABC	ABC	A	A	NA	9500PSI.R1	0	4	0	4	2	10	16	20	1	Triploid
2023-PLATE-113_2022-2355_65-Pressure_9500PSI_R1_065	Fam2	9500 PSI	ABB	ABC	ABB	NA	ABC	AAB	ABC	ABB	A	ABB	ABC	ABB	ABB	A	ABB	AAB	ABC	A	ABB	AAB	NA	9500PSI.R1	1	3	0	3	8	5	16	20	1	Triploid
2023-PLATE-113_2022-2355_66-Pressure_9500PSI_R1_066	Fam3	9500 PSI	ABB	ABC	ABC	ABB	ABC	A	ABC	ABB	ABC	AAB	ABC	AAB	AAB	A	AAB	AAB	ABC	ABB	AAB	AAB	NA	9500PSI.R1	0	2	0	7	4	7	18	20	1	Triploid
2023-PLATE-113_2022-2355_67-Pressure_9500PSI_R1_067	Fam2	9500 PSI	AAB	ABC	ABB	NA	ABC	A	ABC	ABB	AAB	ABB	ABC	ABC	AAB	ABB	ABB	AAB	ABC	ABB	AAB	ABB	NA	9500PSI.R1	1	1	0	5	7	6	18	20	1	Triploid
2023-PLATE-113_2022-2355_68-Pressure_9500PSI_R1_068	Fam1	9500 PSI	ABB	ABC	A	ABB	ABB	AAB	ABB	ABB	ABB	ABC	ABB	AAB	AAB	AAB	ABC	ABC	ABB	ABC	AAB	A	NA	9500PSI.R1	0	2	0	5	8	5	18	20	1	Triploid
2023-PLATE-113_2022-2355_69-Pressure_9500PSI_R1_069	Fam3	9500 PSI	ABB	ABC	ABC	ABB	ABC	AAB	ABC	ABB	ABC	AAB	ABC	AAB	ABC	AAB	AAB	A	ABC	ABC	AAB	AAB	NA	9500PSI.R1	0	1	0	7	3	9	19	20	1	Triploid
2023-PLATE-113_2022-2355_70-Pressure_9500PSI_R1_070	Fam2	9500 PSI	AAB	ABC	ABC	NA	ABC	AAB	ABC	AAB	ABC	ABB	ABB	A	ABC	ABB	ABB	AAB	ABC	ABB	A	AAB	NA	9500PSI.R1	1	2	0	5	5	7	17	20	1	Triploid
2023-PLATE-113_2022-2355_71-Pressure_9500PSI_R1_071	Fam1	9500 PSI	ABC	ABC	ABB	ABC	ABC	AAB	ABB	ABB	ABB	ABC	ABB	AAB	AAB	A	ABC	ABC	ABB	ABC	AAB	A	NA	9500PSI.R1	0	2	0	4	6	8	18	20	1	Triploid
2023-PLATE-113_2022-2355_72-Pressure_9500PSI_R1_072	Fam1	9500 PSI	AAB	ABC	A	ABC	ABB	A	AAB	ABB	ABB	ABC	ABB	AAB	ABC	AAB	ABC	ABC	ABB	ABC	AAB	A	NA	9500PSI.R1	0	3	0	5	5	7	17	20	1	Triploid
2023-PLATE-113_2022-2355_73-Pressure_9500PSI_R1_073	Fam1	9500 PSI	AAB	ABC	ABB	ABC	ABC	AAB	AAB	ABB	ABC	AAB	ABC	AAB	AAB	AAB	ABC	AAB	ABB	A	ABB	AAB	NA	9500PSI.R1	0	1	0	9	4	6	19	20	1	Triploid
2023-PLATE-113_2022-2355_74-Pressure_9500PSI_R1_074	Fam1	9500 PSI	AAB	ABC	A	ABC	AAB	A	ABB	A	ABC	AAB	ABC	AAB	ABC	A	ABC	A	ABB	AAB	ABB	AAB	NA	9500PSI.R1	0	5	0	6	3	6	15	20	1	Triploid
2023-PLATE-113_2022-2355_75-Pressure_9500PSI_R1_075	Fam2	9500 PSI	ABB	ABC	ABC	NA	ABC	AAB	ABC	ABB	ABC	A	ABB	ABB	ABC	A	ABB	AAB	ABC	A	ABB	ABB	NA	9500PSI.R1	1	3	0	2	7	7	16	20	1	Triploid
2023-PLATE-113_2022-2355_76-Pressure_9500PSI_R1_076	Fam3	9500 PSI	ABB	ABC	ABC	ABB	ABC	A	ABC	A	AAB	NA	ABC	ABC	AAB	NA	AAB	AAB	ABC	NA	AAB	AAB	NA	9500PSI.R1	3	2	0	6	2	7	15	20	1	Triploid
2023-PLATE-113_2022-2355_77-Pressure_9500PSI_R1_077	Fam3	9500 PSI	ABB	ABC	ABB	ABB	ABC	AAB	ABC	ABB	ABC	AAB	ABC	ABC	ABC	A	AAB	A	ABC	ABC	AAB	AAB	NA	9500PSI.R1	0	2	0	5	4	9	18	20	1	Triploid
2023-PLATE-113_2022-2355_78-Pressure_9500PSI_R1_078	Fam1	9500 PSI	ABC	ABC	ABB	ABC	ABB	AAB	ABB	ABB	ABB	AAB	ABB	A	AAB	A	ABC	ABC	ABB	ABC	AAB	AAB	NA	9500PSI.R1	0	2	0	5	7	6	18	20	1	Triploid
2023-PLATE-113_2022-2355_79-Pressure_9500PSI_R1_079	Fam3	9500 PSI	AAB	ABC	ABC	ABB	ABC	A	ABC	ABB	ABC	A	ABC	AAB	AAB	AAB	AAB	A	ABC	ABC	AAB	A	NA	9500PSI.R1	0	4	0	6	2	8	16	20	1	Triploid
2023-PLATE-113_2022-2355_80-Pressure_9500PSI_R1_080	Fam1	9500 PSI	AAB	ABC	A	ABC	ABB	A	ABB	ABB	ABB	ABC	ABB	A	ABC	AAB	ABC	ABB	ABB	AAB	AAB	AAB	NA	9500PSI.R1	0	3	0	5	7	5	17	20	1	Triploid
2023-PLATE-113_2022-2355_81-Pressure_9500PSI_R1_081	Fam2	9500 PSI	AAB	ABC	ABB	NA	ABC	A	ABC	ABB	ABB	ABB	ABC	ABB	AAB	A	ABB	AAB	ABC	A	AAB	A	NA	9500PSI.R1	1	4	0	4	6	5	15	20	1	Triploid
2023-PLATE-113_2022-2355_82-Pressure_9500PSI_R1_082	Fam3	9500 PSI	AAB	ABC	ABC	ABB	ABC	AAB	ABC	ABB	ABC	AAB	ABC	ABC	ABC	A	AAB	AAB	ABC	NA	A	A	NA	9500PSI.R1	1	3	0	5	2	9	16	20	1	Triploid
2023-PLATE-113_2022-2355_83-Pressure_9500PSI_R1_083	Fam1	9500 PSI	ABC	ABC	ABB	ABC	ABC	A	AAB	ABB	ABC	AAB	ABC	AAB	ABC	AAB	ABC	ABC	ABB	ABC	AAB	A	NA	9500PSI.R1	0	2	0	5	3	10	18	20	1	Triploid
2023-PLATE-113_2022-2355_84-Pressure_9500PSI_R1_084	Fam2	9500 PSI	ABB	ABC	ABB	A	ABC	A	ABC	AAB	ABC	ABB	ABB	ABB	AAB	AAB	AAB	AAB	ABC	ABB	ABB	AAB	NA	9500PSI.R1	0	2	0	6	7	5	18	20	1	Triploid
2023-PLATE-113_2022-2355_85-Pressure_9500PSI_R1_085	Fam2	9500 PSI	ABB	ABC	ABB	A	ABB	AAB	ABC	AAB	ABC	ABB	ABB	ABC	ABC	AAB	A	AAB	ABC	ABB	ABB	ABB	NA	9500PSI.R1	0	2	0	4	8	6	18	20	1	Triploid
2023-PLATE-113_2022-2355_86-Pressure_9500PSI_R1_086	Fam2	9500 PSI	ABB	ABC	ABB	A	ABC	A	ABC	A	AAB	AAB	ABB	ABB	AAB	ABB	ABB	AAB	ABC	A	A	ABB	NA	9500PSI.R1	0	5	0	4	7	4	15	20	1	Triploid
2023-PLATE-113_2022-2355_87-Pressure_9500PSI_R1_087	Fam2	9500 PSI	ABB	ABC	ABB	A	ABC	A	ABC	A	AAB	ABB	ABC	ABB	AAB	AAB	ABB	AAB	ABC	A	AAB	ABB	NA	9500PSI.R1	0	4	0	5	6	5	16	20	1	Triploid
2023-PLATE-113_2022-2355_88-Pressure_9500PSI_R1_088	Fam1	9500 PSI	ABB	ABB	ABB	ABC	ABC	AAB	ABB	ABB	ABC	AAB	ABC	AAB	AAB	AAB	A	ABB	ABB	ABB	AAB	A	bp shift	9500PSI.R1	0	2	0	6	8	4	18	20	1	Triploid
2023-PLATE-113_2022-2355_89-Pressure_9500PSI_R1_089	Fam2	9500 PSI	ABB	ABC	ABC	NA	ABC	A	AAB	AAB	AAB	A	ABB	ABB	AAB	AAB	AAB	AAB	ABC	ABB	ABB	ABB	NA	9500PSI.R1	1	2	0	7	6	4	17	20	1	Triploid
2023-PLATE-113_2022-2355_90-Pressure_9500PSI_R1_090	Fam3	9500 PSI	AAB	ABC	ABC	ABB	ABC	AAB	ABC	A	ABC	AAB	ABC	ABC	ABC	A	AAB	A	ABC	ABC	AAB	A	NA	9500PSI.R1	0	4	0	5	1	10	16	20	1	Triploid
2023-PLATE-113_2022-2355_91-Pressure_9500PSI_R1_091	Fam1	9500 PSI	AAB	ABC	ABB	ABC	ABC	AAB	AAB	ABB	ABB	ABC	ABB	A	AAB	AAB	ABC	ABB	ABB	AAB	AAB	A	NA	9500PSI.R1	0	2	0	7	6	5	18	20	1	Triploid
2023-PLATE-113_2022-2355_92-Pressure_9500PSI_R1_092	Fam3	9500 PSI	ABB	ABC	ABC	ABB	ABC	A	ABC	ABB	ABC	AAB	ABC	AAB	AAB	A	AAB	A	ABC	ABC	AAB	A	NA	9500PSI.R1	0	4	0	5	3	8	16	20	1	Triploid
2023-PLATE-113_2022-2355_93-Pressure_9500PSI_R1_093	Fam2	9500 PSI	AAB	ABC	ABC	A	ABB	A	ABC	ABB	AAB	ABB	ABC	ABB	AAB	ABB	ABB	AAB	ABC	A	ABB	ABB	NA	9500PSI.R1	0	3	0	4	8	5	17	20	1	Triploid
2023-PLATE-113_2022-2355_94-Pressure_9500PSI_R1_094	Fam3	9500 PSI	ABB	ABC	ABC	ABB	ABC	A	ABC	A	ABC	A	ABC	AAB	AAB	AAB	AAB	AAB	ABC	ABB	AAB	A	NA	9500PSI.R1	0	4	0	6	3	7	16	20	1	Triploid
2023-PLATE-113_2022-2355_95-Pressure_9500PSI_R1_095	Fam2	9500 PSI	AAB	ABC	AAB	A	ABC	A	ABC	ABB	ABC	ABB	ABB	A	AAB	A	A	AAB	ABC	A	A	ABB	NA	9500PSI.R1	0	7	0	4	4	5	13	20	1	Triploid
2023-PLATE-113_2022-2355_96-Pressure_9500PSI_R1_096	Fam3	9500 PSI	AAB	ABC	ABC	ABB	ABC	A	ABC	A	ABC	A	ABC	AAB	AAB	AAB	AAB	A	ABC	ABC	AAB	A	NA	9500PSI.R1	0	5	0	6	1	8	15	20	1	Triploid
2023-PLATE-113_2022-2355_97-Pressure_9500PSI_R1_097	Fam3	9500 PSI	ABB	ABC	ABC	ABB	ABC	AAB	ABC	A	ABC	AAB	ABC	AAB	ABC	AAB	AAB	AAB	ABC	ABB	AAB	A	NA	9500PSI.R1	0	2	0	7	3	8	18	20	1	Triploid
2023-PLATE-113_2022-2355_98-Pressure_9500PSI_R1_098	Fam2	9500 PSI	AAB	ABC	ABB	NA	ABC	A	ABC	ABB	AAB	ABB	ABC	ABC	AAB	A	ABB	AAB	ABC	A	AAB	AAB	NA	9500PSI.R1	1	3	0	6	4	6	16	20	1	Triploid
2023-PLATE-113_2022-2355_99-Pressure_9500PSI_R1_099	Fam1	9500 PSI	ABB	ABC	ABB	ABC	ABB	A	AAB	ABB	ABC	AAB	ABC	A	ABC	AAB	ABC	AAB	ABB	ABB	AAB	A	NA	9500PSI.R1	0	3	0	5	6	6	17	20	1	Triploid
2023-PLATE-114_2022-2355_133-Pressure_9500PSI_R2_008	Fam3	9500 PSI	AAB	ABB	AAB	ABB	ABC	A	ABC	ABB	ABB	AAB	ABC	AAB	A	AAB	AAB	AAB	ABC	ABB	AAB	A	NA	9500PSI.R2	0	3	0	8	5	4	17	20	1	Triploid
2023-PLATE-114_2022-2355_135-Pressure_9500PSI_R2_010	Fam1	9500 PSI	ABC	ABC	ABB	ABC	AAB	A	ABB	ABB	ABB	ABB	ABC	A	AAB	A	ABC	ABC	ABB	ABC	AAB	A	NA	9500PSI.R2	0	4	0	3	6	7	16	20	1	Triploid
2023-PLATE-114_2022-2355_136-Pressure_9500PSI_R2_011	Fam3	9500 PSI	AAB	ABC	ABC	ABB	ABC	A	ABC	ABB	ABC	AAB	ABC	AAB	AAB	A	AAB	AAB	ABC	AAB	ABB	AAB	NA	9500PSI.R2	0	2	0	8	3	7	18	20	1	Triploid
2023-PLATE-114_2022-2355_137-Pressure_9500PSI_R2_012	Fam3	9500 PSI	ABB	ABC	ABC	ABB	ABC	AAB	ABC	ABB	ABC	AAB	ABC	ABC	ABB	A	AAB	A	ABC	ABC	A	A	NA	9500PSI.R2	0	4	0	3	4	9	16	20	1	Triploid
2023-PLATE-114_2022-2355_138-Pressure_9500PSI_R2_013	Fam3	9500 PSI	ABB	ABC	ABC	ABB	ABB	A	AAB	ABB	ABB	A	ABC	AAB	ABB	AAB	AAB	A	ABC	ABC	AAB	A	NA	9500PSI.R2	0	4	0	5	6	5	16	20	1	Triploid
2023-PLATE-114_2022-2355_139-Pressure_9500PSI_R2_014	Fam2	9500 PSI	AAB	AAB	ABC	NA	ABC	AAB	ABC	ABB	ABC	ABC	ABB	ABB	ABC	A	ABB	AAB	ABC	A	AAB	AAB	NA	9500PSI.R2	1	2	0	6	4	7	17	20	1	Triploid
2023-PLATE-114_2022-2355_140-Pressure_9500PSI_R2_015	Fam1	9500 PSI	AAB	ABC	ABB	ABC	ABB	A	AAB	A	ABB	ABC	ABB	AAB	ABC	A	ABC	ABB	ABB	ABB	AAB	A	NA	9500PSI.R2	0	4	0	4	7	5	16	20	1	Triploid
2023-PLATE-114_2022-2355_141-Pressure_9500PSI_R2_016	Fam1	9500 PSI	ABB	ABC	ABB	ABC	ABB	A	AAB	ABB	ABC	AAB	ABC	A	ABC	AAB	ABC	ABB	ABB	ABB	AAB	A	NA	9500PSI.R2	0	3	0	4	7	6	17	20	1	Triploid
2023-PLATE-114_2022-2355_142-Pressure_9500PSI_R2_017	Fam3	9500 PSI	ABB	ABC	ABC	ABB	ABC	A	ABC	A	ABC	AAB	ABC	ABC	AAB	A	AAB	AAB	ABC	ABB	A	A	NA	9500PSI.R2	0	5	0	4	3	8	15	20	1	Triploid
2023-PLATE-114_2022-2355_143-Pressure_9500PSI_R2_018	Fam2	9500 PSI	ABB	ABC	ABC	A	ABC	A	ABC	ABB	ABC	ABB	ABB	A	AAB	AAB	ABB	AAB	ABC	ABB	AAB	AAB	NA	9500PSI.R2	0	3	0	5	6	6	17	20	1	Triploid
2023-PLATE-114_2022-2355_144-Pressure_9500PSI_R2_019	Fam3	9500 PSI	ABB	ABC	ABC	ABB	ABC	AAB	ABC	ABB	ABC	A	ABC	AAB	ABC	A	AAB	A	ABC	AAB	AAB	A	NA	9500PSI.R2	0	4	0	5	3	8	16	20	1	Triploid
2023-PLATE-114_2022-2355_145-Pressure_9500PSI_R2_020	Fam1	9500 PSI	ABC	ABC	A	ABC	AAB	A	AAB	NA	ABC	AAB	ABC	AAB	ABC	A	ABC	ABB	ABB	ABB	A	A	NA	9500PSI.R2	1	5	0	4	3	7	14	20	1	Triploid
2023-PLATE-114_2022-2355_146-Pressure_9500PSI_R2_021	Fam3	9500 PSI	ABB	ABC	ABC	ABB	ABC	A	AAB	A	ABB	A	ABC	AAB	AAB	A	AAB	A	ABC	ABC	AAB	AAB	NA	9500PSI.R2	0	5	0	6	3	6	15	20	1	Triploid
2023-PLATE-114_2022-2355_147-Pressure_9500PSI_R2_022	Fam1	9500 PSI	ABC	ABC	A	ABC	ABC	AAB	ABB	A	ABC	ABC	ABC	A	AAB	A	AAB	ABB	ABB	AAB	AAB	AAB	NA	9500PSI.R2	0	4	0	6	3	7	16	20	1	Triploid
2023-PLATE-114_2022-2355_148-Pressure_9500PSI_R2_023	Fam3	9500 PSI	AAB	ABC	ABC	ABB	ABC	A	ABC	ABB	ABC	AAB	ABC	A	AAB	A	AAB	AAB	ABC	ABB	ABB	AAB	NA	9500PSI.R2	0	3	0	6	4	7	17	20	1	Triploid
2023-PLATE-114_2022-2355_149-Pressure_9500PSI_R2_024	Fam3	9500 PSI	ABB	ABC	ABC	ABB	ABC	AAB	ABC	A	ABC	A	ABC	AAB	ABC	AAB	AAB	A	ABC	ABC	AAB	A	NA	9500PSI.R2	0	4	0	5	2	9	16	20	1	Triploid
2023-PLATE-114_2022-2355_150-Pressure_9500PSI_R2_025	Fam2	9500 PSI	AAB	ABC	AAB	NA	AAB	AAB	ABC	ABB	ABC	ABC	ABB	ABC	ABC	AAB	ABB	AAB	ABC	A	A	ABB	NA	9500PSI.R2	1	2	0	6	4	7	17	20	1	Triploid
2023-PLATE-114_2022-2355_151-Pressure_9500PSI_R2_026	Fam3	9500 PSI	AAB	ABC	ABC	ABB	ABC	A	ABC	ABB	AAB	AAB	AAB	ABB	A	A	AAB	AAB	ABC	A	AAB	AAB	NA	9500PSI.R2	0	4	0	8	3	5	16	20	1	Triploid
2023-PLATE-114_2022-2355_152-Pressure_9500PSI_R2_027	Fam3	9500 PSI	ABB	ABC	ABC	ABB	ABC	A	ABC	ABB	ABC	A	ABC	AAB	AAB	A	AAB	A	ABC	ABC	A	AAB	NA	9500PSI.R2	0	5	0	4	3	8	15	20	1	Triploid
2023-PLATE-114_2022-2355_153-Pressure_9500PSI_R2_028	Fam1	9500 PSI	AAB	ABC	ABB	ABC	ABB	A	ABB	A	ABB	A	ABC	A	ABC	AAB	ABC	ABB	ABB	ABC	ABB	AAB	NA	9500PSI.R2	0	4	0	3	7	6	16	20	1	Triploid
2023-PLATE-114_2022-2355_154-Pressure_9500PSI_R2_029	Fam1	9500 PSI	ABC	ABC	ABB	ABC	ABB	AAB	ABB	ABB	ABC	AAB	ABC	AAB	AAB	AAB	ABC	ABB	ABB	ABB	ABB	AAB	NA	9500PSI.R2	0	0	0	6	8	6	20	20	1	Triploid
2023-PLATE-114_2022-2355_155-Pressure_9500PSI_R2_030	Fam3	9500 PSI	AAB	ABC	ABC	ABB	ABC	AAB	ABC	A	ABB	A	ABC	AAB	ABC	A	AAB	A	ABC	AAB	AAB	A	NA	9500PSI.R2	0	5	0	6	2	7	15	20	1	Triploid
2023-PLATE-114_2022-2355_156-Pressure_9500PSI_R2_031	Fam2	9500 PSI	ABB	ABC	ABB	NA	ABC	AAB	ABC	AAB	ABB	AAB	ABC	ABC	ABC	AAB	ABB	AAB	ABC	A	A	ABB	NA	9500PSI.R2	1	2	0	5	5	7	17	20	1	Triploid
2023-PLATE-114_2022-2355_157-Pressure_9500PSI_R2_032	Fam2	9500 PSI	ABB	ABC	ABB	A	ABC	AAB	ABC	AAB	AAB	ABB	ABC	ABB	ABB	A	ABB	AAB	ABC	ABB	A	AAB	NA	9500PSI.R2	0	3	0	5	7	5	17	20	1	Triploid
2023-PLATE-114_2022-2355_158-Pressure_9500PSI_R2_033	Fam2	9500 PSI	AAB	ABC	ABC	A	ABC	AAB	AAB	AAB	ABC	ABC	ABB	ABC	ABB	AAB	A	AAB	ABC	A	AAB	ABB	NA	9500PSI.R2	0	3	0	7	3	7	17	20	1	Triploid
2023-PLATE-114_2022-2355_159-Pressure_9500PSI_R2_034	Fam1	9500 PSI	AAB	ABC	A	ABC	ABB	AAB	AAB	A	ABC	AAB	ABC	AAB	AAB	A	ABC	ABC	ABB	ABC	AAB	AAB	NA	9500PSI.R2	0	3	0	8	2	7	17	20	1	Triploid
2023-PLATE-114_2022-2355_160-Pressure_9500PSI_R2_035	Fam3	9500 PSI	AAB	ABC	ABC	ABB	ABC	AAB	ABC	A	ABC	A	ABC	AAB	ABC	AAB	AAB	AAB	ABC	ABB	AAB	A	NA	9500PSI.R2	0	3	0	7	2	8	17	20	1	Triploid
2023-PLATE-114_2022-2355_161-Pressure_9500PSI_R2_036	Fam3	9500 PSI	ABB	ABC	ABC	ABB	ABC	AAB	ABC	A	ABC	A	ABC	AAB	ABC	A	AAB	A	ABC	ABC	AAB	AAB	NA	9500PSI.R2	0	4	0	5	2	9	16	20	1	Triploid
2023-PLATE-114_2022-2355_162-Pressure_9500PSI_R2_037	Fam1	9500 PSI	ABC	ABB	A	ABC	ABC	A	AAB	ABB	A	AAB	ABB	A	AAB	A	AAB	A	ABB	AAB	AAB	AAB	NA	9500PSI.R2	0	6	0	7	4	3	14	20	1	Triploid
2023-PLATE-114_2022-2355_163-Pressure_9500PSI_R2_038	Fam1	9500 PSI	ABC	ABC	ABB	ABC	ABB	A	ABB	ABB	A	ABB	AAB	AAB	ABC	A	ABC	AAB	ABB	ABB	A	A	NA	9500PSI.R2	0	5	0	3	7	5	15	20	1	Triploid
2023-PLATE-114_2022-2355_164-Pressure_9500PSI_R2_039	Fam2	9500 PSI	AAB	ABC	A	NA	ABC	A	ABC	A	AAB	ABC	ABC	ABC	AAB	A	AAB	AAB	ABC	A	ABB	ABC	NA	9500PSI.R2	1	5	0	5	1	8	14	20	1	Triploid
2023-PLATE-114_2022-2355_165-Pressure_9500PSI_R2_040	Fam2	9500 PSI	AAB	ABC	ABC	A	ABC	A	ABC	AAB	ABC	ABB	ABB	ABB	AAB	A	ABB	AAB	ABC	A	AAB	ABB	NA	9500PSI.R2	0	4	0	5	5	6	16	20	1	Triploid
2023-PLATE-114_2022-2355_166-Pressure_9500PSI_R2_041	Fam2	9500 PSI	ABB	ABC	ABC	NA	ABB	AAB	AAB	ABB	AAB	ABB	ABC	ABB	ABC	ABB	AAB	AAB	ABC	A	AAB	ABB	NA	9500PSI.R2	1	1	0	6	7	5	18	20	1	Triploid
2023-PLATE-114_2022-2355_167-Pressure_9500PSI_R2_042	Fam2	9500 PSI	AAB	ABC	ABB	A	ABC	AAB	ABC	A	A	ABB	ABB	ABB	ABC	AAB	ABB	AAB	ABC	ABB	AAB	ABB	NA	9500PSI.R2	0	3	0	5	7	5	17	20	1	Triploid
2023-PLATE-114_2022-2355_168-Pressure_9500PSI_R2_043	Fam1	9500 PSI	ABC	ABC	A	ABC	ABB	A	ABB	ABB	ABB	ABC	ABB	A	ABC	AAB	ABC	ABB	ABB	ABB	ABB	A	NA	9500PSI.R2	0	4	0	1	9	6	16	20	1	Triploid
2023-PLATE-114_2022-2355_169-Pressure_9500PSI_R2_044	Fam2	9500 PSI	AAB	ABC	ABB	A	ABC	AAB	AAB	AAB	AAB	AAB	ABB	ABC	ABC	A	A	AAB	ABC	A	A	ABB	NA	9500PSI.R2	0	5	0	7	3	5	15	20	1	Triploid
2023-PLATE-114_2022-2355_170-Pressure_9500PSI_R2_045	Fam1	9500 PSI	AAB	ABC	A	ABC	ABC	AAB	AAB	ABB	ABB	AAB	ABB	AAB	AAB	A	ABC	ABB	ABB	AAB	ABB	AAB	bp shift	9500PSI.R2	0	2	0	8	6	4	18	20	1	Triploid
2023-PLATE-114_2022-2355_171-Pressure_9500PSI_R2_046	Fam2	9500 PSI	ABB	ABC	ABB	A	ABC	A	AAB	ABB	ABC	AAB	ABB	ABC	A	A	AAB	AAB	ABC	ABB	AAB	A	NA	9500PSI.R2	0	5	0	5	5	5	15	20	1	Triploid
2023-PLATE-114_2022-2355_172-Pressure_9500PSI_R2_047	Fam3	9500 PSI	ABB	ABC	AAB	ABB	AAB	A	ABC	ABB	ABC	A	ABC	ABC	AAB	A	AAB	AAB	ABC	ABB	AAB	AAB	NA	9500PSI.R2	0	3	0	7	4	6	17	20	1	Triploid
2023-PLATE-114_2022-2355_173-Pressure_9500PSI_R2_048	Fam1	9500 PSI	ABB	ABC	A	ABC	ABB	A	ABB	A	ABB	ABC	ABB	AAB	AAB	A	ABC	ABC	ABB	ABC	A	AAB	NA	9500PSI.R2	0	5	0	3	6	6	15	20	1	Triploid
2023-PLATE-114_2022-2355_174-Pressure_9500PSI_R2_049	Fam2	9500 PSI	AAB	ABC	ABB	A	ABC	AAB	AAB	ABB	AAB	A	ABB	ABB	ABC	ABB	AAB	AAB	ABC	A	AAB	A	NA	9500PSI.R2	0	4	0	7	5	4	16	20	1	Triploid
2023-PLATE-114_2022-2355_175-Pressure_9500PSI_R2_050	Fam2	9500 PSI	ABB	ABC	ABB	A	ABC	AAB	ABC	AAB	AAB	ABB	ABB	ABC	ABC	ABB	ABB	AAB	ABC	A	AAB	ABB	NA	9500PSI.R2	0	2	0	5	7	6	18	20	1	Triploid
2023-PLATE-114_2022-2355_176-Pressure_9500PSI_R2_051	Fam1	9500 PSI	AAB	ABC	ABB	ABC	ABC	A	ABB	ABB	ABB	AAB	ABB	A	ABC	A	ABC	AAB	ABB	AAB	AAB	A	NA	9500PSI.R2	0	4	0	5	6	5	16	20	1	Triploid
2023-PLATE-114_2022-2355_177-Pressure_9500PSI_R2_052	Fam1	9500 PSI	ABB	ABC	ABB	ABC	ABB	A	AAB	ABB	ABB	ABC	ABB	A	ABC	AAB	ABC	ABC	ABB	ABC	ABB	AAB	NA	9500PSI.R2	0	2	0	3	8	7	18	20	1	Triploid
2023-PLATE-114_2022-2355_178-Pressure_9500PSI_R2_053	Fam2	9500 PSI	AAB	ABC	ABB	NA	ABC	AAB	AAB	ABB	ABB	ABB	ABC	ABB	ABB	A	ABB	AAB	ABC	A	A	ABB	bp shift	9500PSI.R2	1	3	0	4	8	4	16	20	1	Triploid
2023-PLATE-114_2022-2355_179-Pressure_9500PSI_R2_054	Fam1	9500 PSI	ABB	ABC	ABB	ABC	ABB	AAB	AAB	ABB	ABC	A	ABC	A	A	A	ABB	NA	ABB	ABB	AAB	AAB	NA	9500PSI.R2	1	4	0	4	7	4	15	20	1	Triploid
2023-PLATE-114_2022-2355_180-Pressure_9500PSI_R2_055	Fam2	9500 PSI	AAB	ABC	ABC	A	ABC	AAB	ABC	ABB	ABC	ABB	ABB	ABC	ABC	A	ABB	AAB	ABC	A	A	A	NA	9500PSI.R2	0	5	0	3	4	8	15	20	1	Triploid
2023-PLATE-114_2022-2355_181-Pressure_9500PSI_R2_056	Fam3	9500 PSI	ABB	ABC	ABC	ABB	ABC	AAB	ABB	A	ABB	AAB	ABB	AAB	ABC	AAB	AAB	A	ABC	ABC	AAB	A	NA	9500PSI.R2	0	3	0	6	5	6	17	20	1	Triploid
2023-PLATE-114_2022-2355_182-Pressure_9500PSI_R2_057	Fam3	9500 PSI	AAB	ABC	ABC	ABB	ABC	AAB	ABC	ABB	ABC	A	ABC	AAB	ABC	A	AAB	AAB	ABC	AAB	AAB	A	NA	9500PSI.R2	0	3	0	7	2	8	17	20	1	Triploid
2023-PLATE-114_2022-2355_183-Pressure_9500PSI_R2_058	Fam2	9500 PSI	ABB	ABC	ABB	A	ABC	A	ABC	AAB	AAB	AAB	ABB	AAB	AAB	AAB	ABB	AAB	ABC	ABB	AAB	ABB	NA	9500PSI.R2	0	2	0	8	6	4	18	20	1	Triploid
2023-PLATE-114_2022-2355_184-Pressure_9500PSI_R2_059	Fam3	9500 PSI	AAB	ABC	ABC	ABB	ABC	AAB	ABC	ABB	ABB	A	ABC	AAB	ABC	A	AAB	AAB	ABC	ABB	A	A	NA	9500PSI.R2	0	4	0	5	4	7	16	20	1	Triploid
2023-PLATE-114_2022-2355_185-Pressure_9500PSI_R2_060	Fam2	9500 PSI	ABB	ABC	ABB	A	ABC	AAB	ABC	ABB	ABC	ABB	ABB	ABC	ABC	A	A	AAB	ABC	A	ABB	ABB	bp shift	9500PSI.R2	0	4	0	2	7	7	16	20	1	Triploid
2023-PLATE-114_2022-2355_186-Pressure_9500PSI_R2_061	Fam1	9500 PSI	AAB	ABC	A	ABC	ABC	AAB	ABB	ABB	ABB	ABC	ABB	AAB	AAB	AAB	AAB	ABB	ABB	ABB	AAB	A	NA	9500PSI.R2	0	2	0	7	7	4	18	20	1	Triploid
2023-PLATE-114_2022-2355_187-Pressure_9500PSI_R2_062	Fam2	9500 PSI	ABB	ABC	ABC	A	AAB	AAB	ABC	ABB	AAB	A	ABB	ABB	ABC	ABB	ABB	AAB	ABC	A	A	ABB	NA	9500PSI.R2	0	4	0	4	7	5	16	20	1	Triploid
2023-PLATE-114_2022-2355_188-Pressure_9500PSI_R2_063	Fam1	9500 PSI	ABC	ABC	ABB	ABC	ABB	AAB	ABB	ABB	ABB	A	ABC	AAB	A	A	ABC	ABC	ABB	ABC	AAB	AAB	NA	9500PSI.R2	0	3	0	4	6	7	17	20	1	Triploid
2023-PLATE-114_2022-2355_189-Pressure_9500PSI_R2_064	Fam2	9500 PSI	AAB	ABC	AAB	NA	ABC	A	ABC	A	ABB	ABB	ABC	ABB	AAB	A	AAB	AAB	ABC	A	A	A	NA	9500PSI.R2	1	6	0	5	3	5	13	20	1	Triploid
2023-PLATE-114_2022-2355_190-Pressure_9500PSI_R2_065	Fam2	9500 PSI	AAB	ABC	ABB	A	ABC	AAB	ABC	AAB	AAB	ABB	ABC	ABC	ABC	ABB	ABB	AAB	ABC	A	A	ABB	NA	9500PSI.R2	0	3	0	5	5	7	17	20	1	Triploid
2023-PLATE-114_2022-2355_191-Pressure_9500PSI_R2_066	Fam3	9500 PSI	AAB	ABC	ABC	ABB	ABC	AAB	AAB	ABB	ABB	A	ABC	ABC	ABC	AAB	AAB	A	ABC	ABC	AAB	A	NA	9500PSI.R2	0	3	0	6	3	8	17	20	1	Triploid
2023-PLATE-114_2022-2355_192-Pressure_9500PSI_R2_067	Fam2	9500 PSI	AAB	ABC	ABC	A	ABC	A	AAB	ABB	ABC	ABC	ABB	ABB	AAB	AAB	AAB	AAB	ABC	A	A	AAB	NA	9500PSI.R2	0	4	0	7	3	6	16	20	1	Triploid
2023-PLATE-114_2022-2355_193-Pressure_9500PSI_R2_068	Fam1	9500 PSI	ABC	ABC	A	ABC	ABB	AAB	AAB	A	AAB	A	ABB	AAB	AAB	A	AAB	ABB	ABB	ABB	ABB	A	NA	9500PSI.R2	0	5	0	6	6	3	15	20	1	Triploid
2023-PLATE-114_2022-2355_194-Pressure_9500PSI_R2_069	Fam1	9500 PSI	ABC	ABC	ABB	ABC	A	AAB	AAB	A	ABC	AAB	ABC	A	AAB	A	ABC	ABC	ABB	ABC	AAB	A	NA	9500PSI.R2	0	5	0	5	2	8	15	20	1	Triploid
2023-PLATE-114_2022-2355_195-Pressure_9500PSI_R2_070	Fam3	9500 PSI	ABB	ABC	ABC	ABB	ABC	A	ABC	ABB	ABC	A	ABC	ABC	AAB	A	AAB	A	ABC	ABC	A	AAB	NA	9500PSI.R2	0	5	0	3	3	9	15	20	1	Triploid
2023-PLATE-114_2022-2355_196-Pressure_9500PSI_R2_071	Fam3	9500 PSI	ABB	ABC	ABC	ABB	ABB	AAB	ABC	A	ABC	AAB	ABC	AAB	ABC	A	AAB	A	ABC	ABC	AAB	A	NA	9500PSI.R2	0	4	0	5	3	8	16	20	1	Triploid
2023-PLATE-114_2022-2355_197-Pressure_9500PSI_R2_072	Fam3	9500 PSI	AAB	ABC	ABC	ABB	ABC	A	AAB	ABB	ABC	A	ABC	AAB	AAB	AAB	AAB	A	ABC	AAB	AAB	AAB	NA	9500PSI.R2	0	3	0	9	2	6	17	20	1	Triploid
2023-PLATE-114_2022-2355_198-Pressure_9500PSI_R2_073	Fam1	9500 PSI	ABC	ABC	ABB	ABC	ABC	AAB	ABB	ABB	ABC	AAB	ABC	AAB	AAB	AAB	ABC	ABB	ABB	ABB	A	A	NA	9500PSI.R2	0	2	0	5	6	7	18	20	1	Triploid
2023-PLATE-114_2022-2355_199-Pressure_9500PSI_R2_074	Fam2	9500 PSI	AAB	ABC	ABB	A	ABC	AAB	ABC	AAB	AAB	A	A	ABC	ABC	ABB	ABB	AAB	ABC	ABB	AAB	ABC	NA	9500PSI.R2	0	3	0	6	4	7	17	20	1	Triploid
2023-PLATE-114_2022-2355_200-Pressure_9500PSI_R2_075	Fam3	9500 PSI	AAB	ABC	ABC	ABB	ABC	A	ABC	A	ABC	A	ABC	AAB	AAB	AAB	AAB	AAB	ABC	A	AAB	AAB	NA	9500PSI.R2	0	4	0	8	1	7	16	20	1	Triploid
2023-PLATE-114_2022-2355_201-Pressure_9500PSI_R2_076	Fam3	9500 PSI	AAB	ABC	ABC	ABB	ABB	AAB	ABC	ABB	ABC	AAB	ABC	ABC	ABC	AAB	AAB	A	ABC	ABC	AAB	A	NA	9500PSI.R2	0	2	0	6	3	9	18	20	1	Triploid
2023-PLATE-114_2022-2355_202-Pressure_9500PSI_R2_077	Fam2	9500 PSI	ABB	ABC	ABC	A	ABC	AAB	ABC	AAB	AAB	ABB	ABC	ABC	ABB	AAB	ABB	AAB	ABC	ABB	A	ABB	NA	9500PSI.R2	0	2	0	5	6	7	18	20	1	Triploid
2023-PLATE-114_2022-2355_203-Pressure_9500PSI_R2_078	Fam3	9500 PSI	AAB	ABC	AAB	ABB	ABC	AAB	ABC	ABB	ABB	A	ABC	AAB	ABC	AAB	AAB	A	ABC	AAB	A	AAB	NA	9500PSI.R2	0	3	0	8	3	6	17	20	1	Triploid
2023-PLATE-114_2022-2355_204-Pressure_9500PSI_R2_079	Fam1	9500 PSI	ABB	ABB	ABB	ABC	ABC	A	ABB	ABB	ABB	ABC	ABB	A	ABC	AAB	ABC	ABB	ABB	ABB	A	AAB	NA	9500PSI.R2	0	3	0	2	10	5	17	20	1	Triploid
2023-PLATE-114_2022-2355_205-Pressure_9500PSI_R2_080	Fam1	9500 PSI	ABB	ABC	ABB	ABC	ABC	A	ABB	ABB	AAB	A	ABB	AAB	AAB	AAB	ABC	AAB	ABB	AAB	AAB	A	NA	9500PSI.R2	0	3	0	7	6	4	17	20	1	Triploid
2023-PLATE-114_2022-2355_206-Pressure_9500PSI_R2_081	Fam1	9500 PSI	ABB	ABC	A	ABC	ABC	A	ABB	A	ABC	AAB	ABC	AAB	ABC	A	ABC	ABC	ABB	ABC	AAB	A	NA	9500PSI.R2	0	5	0	3	3	9	15	20	1	Triploid
2023-PLATE-114_2022-2355_207-Pressure_9500PSI_R2_082	Fam3	9500 PSI	ABB	ABC	ABC	ABB	ABC	AAB	ABC	ABB	ABC	AAB	ABC	AAB	ABC	AAB	AAB	AAB	ABC	ABB	A	A	NA	9500PSI.R2	0	2	0	6	4	8	18	20	1	Triploid
2023-PLATE-114_2022-2355_208-Pressure_9500PSI_R2_083	Fam3	9500 PSI	AAB	ABC	ABC	ABB	ABC	AAB	ABC	A	ABC	AAB	ABC	AAB	ABC	A	AAB	AAB	ABC	ABB	ABB	A	NA	9500PSI.R2	0	3	0	6	3	8	17	20	1	Triploid
2023-PLATE-114_2022-2355_209-Pressure_9500PSI_R2_084	Fam3	9500 PSI	ABB	ABC	AAB	ABB	ABC	A	ABC	ABB	ABC	A	ABC	AAB	AAB	A	AAB	AAB	ABC	ABB	AAB	A	NA	9500PSI.R2	0	4	0	6	4	6	16	20	1	Triploid
2023-PLATE-114_2022-2355_210-Pressure_9500PSI_R2_085	Fam2	9500 PSI	AAB	ABB	ABB	A	AAB	A	ABC	AAB	AAB	AAB	ABB	ABB	AAB	AAB	AAB	AAB	ABC	ABB	AAB	ABB	NA	9500PSI.R2	0	2	0	10	6	2	18	20	1	Triploid
2023-PLATE-114_2022-2355_211-Pressure_9500PSI_R2_086	Fam1	9500 PSI	ABB	ABC	ABB	ABC	ABB	A	AAB	A	ABB	ABB	ABB	A	ABC	A	ABC	ABB	ABB	ABB	A	AAB	NA	9500PSI.R2	0	5	0	2	9	4	15	20	1	Triploid
2023-PLATE-114_2022-2355_212-Pressure_9500PSI_R2_087	Fam3	9500 PSI	AAB	ABC	ABC	ABB	ABC	A	ABC	ABB	ABC	A	ABC	ABC	AAB	A	AAB	AAB	ABC	ABB	AAB	A	NA	9500PSI.R2	0	4	0	5	3	8	16	20	1	Triploid
2023-PLATE-114_2022-2355_213-Pressure_9500PSI_R2_088	Fam3	9500 PSI	ABB	ABC	ABC	ABB	ABC	A	ABC	ABB	ABC	A	ABC	ABC	ABB	AAB	AAB	AAB	ABC	ABB	AAB	A	NA	9500PSI.R2	0	3	0	4	5	8	17	20	1	Triploid
2023-PLATE-114_2022-2355_214-Pressure_9500PSI_R2_089	Fam2	9500 PSI	AAB	ABC	ABB	NA	ABC	A	ABC	A	ABC	ABB	ABB	ABC	AAB	AAB	ABB	AAB	ABC	ABB	A	ABB	NA	9500PSI.R2	1	3	0	4	6	6	16	20	1	Triploid
2023-PLATE-114_2022-2355_215-Pressure_9500PSI_R2_090	Fam2	9500 PSI	ABB	ABC	AAB	A	ABC	AAB	ABC	AAB	AAB	AAB	ABB	ABC	ABC	ABB	AAB	AAB	ABC	ABB	AAB	A	NA	9500PSI.R2	0	2	0	8	4	6	18	20	1	Triploid
2023-PLATE-114_2022-2355_216-Pressure_9500PSI_R2_091	Fam2	9500 PSI	ABB	ABC	ABC	NA	ABC	A	ABC	AAB	ABC	ABB	ABB	ABC	AAB	AAB	A	AAB	ABC	A	AAB	A	NA	9500PSI.R2	1	4	0	5	3	7	15	20	1	Triploid
2023-PLATE-114_2022-2355_217-Pressure_9500PSI_R2_092	Fam1	9500 PSI	ABB	ABC	ABB	ABC	ABC	A	AAB	A	ABB	ABC	ABB	A	ABC	AAB	ABC	ABB	ABB	ABB	A	AAB	NA	9500PSI.R2	0	4	0	3	7	6	16	20	1	Triploid
2023-PLATE-114_2022-2355_218-Pressure_9500PSI_R2_093	Fam1	9500 PSI	NA	ABC	ABB	ABC	ABB	AAB	AAB	A	ABB	AAB	ABB	AAB	AAB	AAB	ABC	A	ABB	AAB	AAB	AAB	NA	9500PSI.R2	1	2	0	9	5	3	17	20	1	Triploid
2023-PLATE-114_2022-2355_219-Pressure_9500PSI_R2_094	Fam2	9500 PSI	ABB	ABC	ABB	A	ABC	A	ABC	A	AAB	ABC	ABC	ABC	AAB	A	ABB	AAB	ABC	A	AAB	AAB	NA	9500PSI.R2	0	5	0	5	3	7	15	20	1	Triploid
2023-PLATE-114_2022-2355_220-Pressure_9500PSI_R2_095	Fam1	9500 PSI	ABC	ABC	ABB	ABC	ABC	A	ABB	ABB	ABC	ABC	ABB	AAB	ABC	AAB	ABB	ABC	ABB	ABC	AAB	AAB	bp shift	9500PSI.R2	0	1	0	4	6	9	19	20	1	Triploid
2023-PLATE-114_2022-2355_221-Pressure_9500PSI_R2_096	Fam1	9500 PSI	ABC	ABC	ABB	ABC	ABC	A	AAB	ABB	ABC	AAB	ABC	A	ABB	A	ABC	ABB	ABB	ABB	A	AAB	NA	9500PSI.R2	0	4	0	3	6	7	16	20	1	Triploid
2023-PLATE-114_2022-2355_222-Pressure_9500PSI_R2_097	Fam2	9500 PSI	ABB	ABC	ABB	A	ABC	AAB	ABC	AAB	AAB	ABB	ABB	ABC	ABC	A	ABB	AAB	ABC	ABB	ABB	ABB	NA	9500PSI.R2	0	2	0	4	8	6	18	20	1	Triploid
2023-PLATE-114_2022-2355_223-Pressure_9500PSI_R2_098	Fam1	9500 PSI	ABB	ABC	ABB	ABC	ABB	A	ABB	A	AAB	A	ABB	A	ABC	AAB	ABC	ABC	ABB	ABC	AAB	A	NA	9500PSI.R2	0	5	0	3	6	6	15	20	1	Triploid
2023-PLATE-114_2022-2355_224-Pressure_9500PSI_R2_099	Fam2	9500 PSI	ABB	ABC	ABB	A	ABC	A	ABC	A	ABC	ABC	ABB	ABC	AAB	A	ABB	AAB	ABC	ABB	AAB	A	NA	9500PSI.R2	0	5	0	3	5	7	15	20	1	Triploid
2023-PLATE-114_2022-2355_225-Pressure_9500PSI_R2_100	Fam3	9500 PSI	AAB	ABC	ABC	ABB	ABB	AAB	ABC	A	ABC	AAB	ABC	AAB	ABB	A	AAB	AAB	ABC	ABB	AAB	A	NA	9500PSI.R2	0	3	0	7	4	6	17	20	1	Triploid
2023-PLATE-114_2022-2355_226-Pressure_9500PSI_R2_101	Fam1	9500 PSI	AAB	ABC	ABB	ABC	ABB	A	AAB	A	ABC	ABC	ABC	A	ABC	A	ABC	ABC	ABB	ABC	AAB	AAB	NA	9500PSI.R2	0	4	0	4	3	9	16	20	1	Triploid
2023-PLATE-181_2022-2355_227-Pressure_9500PSI_R2_102	Fam3	9500 PSI	AAB	ABC	ABC	ABB	NA	AAB	ABC	A	AAB	AAB	ABC	AAB	ABC	A	AAB	AAB	ABC	A	AAB	A	NA	9500PSI.R2	1	4	0	8	1	6	15	20	1	Triploid
2023-PLATE-181_2022-2355_228-Pressure_9500PSI_R2_103	Fam2	9500 PSI	ABB	ABC	A	A	AAB	AAB	ABC	ABB	AAB	AAB	AAB	ABB	ABC	AAB	AAB	AAB	ABC	A	ABB	ABB	NA	9500PSI.R2	0	3	0	8	5	4	17	20	1	Triploid
2023-PLATE-181_2022-2355_229-Pressure_9500PSI_R2_104	Fam1	9500 PSI	ABC	ABC	ABB	ABC	ABB	AAB	ABB	ABB	ABB	AAB	ABB	AAB	AAB	AAB	AAB	ABB	ABB	ABB	ABB	A	NA	9500PSI.R2	0	1	0	6	10	3	19	20	1	Triploid
2023-PLATE-181_2022-2355_230-Pressure_9500PSI_R2_105	Fam3	9500 PSI	ABB	ABC	ABC	ABB	ABC	A	ABC	A	ABC	AAB	ABC	ABC	AAB	A	AAB	AAB	ABC	ABB	ABB	AAB	NA	9500PSI.R2	0	3	0	5	4	8	17	20	1	Triploid
2023-PLATE-181_2022-2355_231-Pressure_9500PSI_R2_106	Fam3	9500 PSI	AAB	ABC	ABC	ABB	ABC	AAB	ABC	A	AAB	AAB	ABC	ABC	ABC	AAB	AAB	A	ABC	ABC	ABB	A	NA	9500PSI.R2	0	3	0	6	2	9	17	20	1	Triploid
2023-PLATE-181_2022-2355_232-Pressure_9500PSI_R2_107	Fam2	9500 PSI	ABB	ABC	ABB	NA	ABC	A	ABC	AB	NA	ABB	ABC	A	AAB	NA	ABB	AB	ABC	A	A	AAB	NA	9500PSI.R2	3	4	2	2	4	5	11	20	0.846154	Aneuploid
2023-PLATE-181_2022-2355_233-Pressure_9500PSI_R2_108	Fam2	9500 PSI	AAB	ABC	A	A	ABC	AAB	ABB	ABB	ABC	ABB	ABB	ABB	ABC	AAB	AAB	AAB	ABC	ABB	AAB	ABB	NA	9500PSI.R2	0	2	0	6	7	5	18	20	1	Triploid
2023-PLATE-181_2022-2355_234-Pressure_9500PSI_R2_109	Fam2	9500 PSI	ABB	AAB	A	NA	ABC	A	ABC	A	AAB	ABC	ABC	ABC	AAB	A	AAB	AAB	ABC	A	AAB	ABB	NA	9500PSI.R2	1	5	0	6	2	6	14	20	1	Triploid
2023-PLATE-181_2022-2355_235-Pressure_9500PSI_R2_110	Fam2	9500 PSI	AAB	ABC	ABB	A	ABC	A	ABC	AAB	ABB	AAB	ABC	ABB	A	ABB	A	AAB	ABC	A	A	ABB	NA	9500PSI.R2	0	6	0	4	5	5	14	20	1	Triploid
2023-PLATE-181_2022-2355_236-Pressure_9500PSI_R2_111	Fam3	9500 PSI	ABB	ABC	ABC	ABB	ABC	A	ABC	ABB	ABC	A	ABC	AAB	AAB	A	AAB	A	ABC	AAB	AAB	A	NA	9500PSI.R2	0	5	0	5	3	7	15	20	1	Triploid
2023-PLATE-181_2022-2355_237-Pressure_9500PSI_R2_112	Fam1	9500 PSI	ABC	ABC	ABB	ABC	ABC	A	ABB	ABB	ABB	ABC	ABB	A	ABC	AAB	ABC	A	ABB	AAB	AAB	A	NA	9500PSI.R2	0	4	0	3	6	7	16	20	1	Triploid
2023-PLATE-181_2022-2355_238-Pressure_9500PSI_R2_113	Fam2	9500 PSI	AAB	ABC	ABB	NA	ABC	AAB	ABC	ABB	AAB	ABC	ABC	ABC	ABC	A	ABB	AAB	ABC	ABB	AAB	ABB	NA	9500PSI.R2	1	1	0	5	5	8	18	20	1	Triploid
2023-PLATE-181_2022-2355_239-Pressure_9500PSI_R2_114	Fam1	9500 PSI	AAB	ABC	ABB	ABC	AAB	A	AAB	A	ABB	A	ABB	AAB	ABC	AAB	ABC	ABB	ABB	ABB	AAB	A	NA	9500PSI.R2	0	4	0	6	6	4	16	20	1	Triploid
2023-PLATE-181_2022-2355_240-Pressure_9500PSI_R2_115	Fam3	9500 PSI	ABB	ABC	ABC	ABB	ABC	A	ABC	A	ABB	A	ABC	AAB	AAB	A	AAB	AAB	ABC	ABB	AAB	A	NA	9500PSI.R2	0	5	0	5	4	6	15	20	1	Triploid
2023-PLATE-181_2022-2355_241-Pressure_9500PSI_R2_116	Fam3	9500 PSI	AAB	ABC	ABC	NA	ABC	AAB	ABB	A	ABB	A	ABC	ABC	ABC	AAB	AAB	AAB	ABC	ABB	AAB	A	NA	9500PSI.R2	1	3	0	6	3	7	16	20	1	Triploid
2023-PLATE-181_2022-2355_242-Pressure_9500PSI_R2_117	Fam1	9500 PSI	ABC	ABC	ABB	ABC	ABC	AAB	ABB	ABB	A	AAB	ABB	AAB	ABB	A	ABC	AAB	ABB	AAB	AAB	AAB	bp shift	9500PSI.R2	0	2	0	7	6	5	18	20	1	Triploid
2023-PLATE-181_2022-2355_243-Pressure_9500PSI_R2_118	Fam1	9500 PSI	AAB	ABC	A	ABC	ABC	A	ABB	A	ABB	ABC	ABB	AAB	ABC	A	ABB	AAB	ABB	A	ABB	AAB	NA	9500PSI.R2	0	5	0	4	6	5	15	20	1	Triploid
2023-PLATE-181_2022-2355_244-Pressure_9500PSI_R2_119	Fam2	9500 PSI	AAB	ABC	ABC	NA	ABC	AAB	ABB	ABB	A	ABB	ABC	ABB	ABB	A	ABB	AAB	ABC	ABB	AAB	ABC	NA	9500PSI.R2	1	2	0	4	7	6	17	20	1	Triploid
2023-PLATE-181_2022-2355_245-Pressure_9500PSI_R2_120	Fam3	9500 PSI	ABB	ABC	ABC	ABB	ABC	AAB	ABB	ABB	ABC	A	ABC	AAB	ABB	AAB	AAB	AAB	ABC	AAB	AAB	AAB	NA	9500PSI.R2	0	1	0	8	5	6	19	20	1	Triploid
2023-PLATE-181_2022-2355_246-Pressure_9500PSI_R2_121	Fam2	9500 PSI	ABB	ABC	ABC	NA	ABB	A	ABC	ABB	AAB	A	ABB	ABB	AAB	A	ABB	AAB	ABC	ABB	A	ABB	NA	9500PSI.R2	1	4	0	3	8	4	15	20	1	Triploid
2023-PLATE-181_2022-2355_247-Pressure_9500PSI_R2_122	Fam2	9500 PSI	ABB	ABC	ABC	NA	ABC	AAB	ABC	ABB	ABC	ABB	ABB	ABB	ABC	A	A	AAB	ABC	A	A	ABB	bp shift	9500PSI.R2	1	4	0	2	6	7	15	20	1	Triploid
2023-PLATE-181_2022-2355_248-Pressure_9500PSI_R2_123	Fam3	9500 PSI	AAB	ABC	ABC	ABB	ABB	A	ABC	A	ABC	AAB	ABC	AAB	AAB	A	AAB	A	ABC	ABC	A	A	NA	9500PSI.R2	0	6	0	5	2	7	14	20	1	Triploid
2023-PLATE-181_2022-2355_249-Pressure_9500PSI_R2_124	Fam1	9500 PSI	ABB	ABC	ABB	ABC	ABB	A	AAB	ABB	ABB	ABC	ABB	A	ABC	AAB	ABC	AAB	ABB	ABB	ABB	AAB	NA	9500PSI.R2	0	2	0	4	9	5	18	20	1	Triploid
2023-PLATE-181_2022-2355_250-Pressure_9500PSI_R2_125	Fam1	9500 PSI	ABB	ABC	ABB	ABC	ABC	A	ABB	ABB	ABC	AAB	ABC	AAB	ABC	AAB	ABB	ABC	ABB	ABC	A	A	NA	9500PSI.R2	0	3	0	3	6	8	17	20	1	Triploid
2023-PLATE-47_2022-2345_10-Pressure_0PSI_R1_010	Fam2	0 PSI	AB	AB	AB	A	AB	A	AB	AB	AB	AB	AB	AB	A	A	A	AB	AB	A	AB	A	NA	0PSI.R1	0	7	13	0	0	0	0	20	0	Diploid
2023-PLATE-47_2022-2345_11-Pressure_0PSI_R1_011	Fam2	0 PSI	AB	AB	AB	A	AB	AB	AB	AB	AB	A	AB	A	AB	A	AB	AB	AB	AB	AB	AB	NA	0PSI.R1	0	4	16	0	0	0	0	20	0	Diploid
2023-PLATE-47_2022-2345_12-Pressure_0PSI_R1_012	Fam2	0 PSI	AB	AB	A	A	AB	A	AB	A	AB	AB	AB	AB	A	A	AB	AB	AB	A	AB	AB	NA	0PSI.R1	0	7	13	0	0	0	0	20	0	Diploid
2023-PLATE-47_2022-2345_13-Pressure_0PSI_R1_013	Fam3	0 PSI	AB	AB	AB	AB	AB	A	AB	AB	AB	AB	AB	A	AB	AB	AB	AB	AB	A	AB	A	NA	0PSI.R1	0	4	16	0	0	0	0	20	0	Diploid
2023-PLATE-47_2022-2345_14-Pressure_0PSI_R1_014	Fam3	0 PSI	AB	AB	AB	AB	AB	AB	AB	AB	AB	AB	AB	AB	AB	A	AB	AB	AB	A	A	AB	NA	0PSI.R1	0	3	17	0	0	0	0	20	0	Diploid
2023-PLATE-47_2022-2345_15-Pressure_0PSI_R1_015	Fam3	0 PSI	AB	AB	AB	AB	AB	AB	AB	AB	AB	AB	AB	AB	AB	A	AB	A	AB	AB	A	A	NA	0PSI.R1	0	4	16	0	0	0	0	20	0	Diploid
2023-PLATE-47_2022-2345_16-Pressure_0PSI_R1_016	Fam3	0 PSI	AB	AB	AB	AB	AB	A	AB	AB	AB	A	AB	AB	A	AB	AB	AB	AB	A	A	AB	NA	0PSI.R1	0	5	15	0	0	0	0	20	0	Diploid
2023-PLATE-47_2022-2345_17-Pressure_0PSI_R1_017	Fam1	0 PSI	AB	AB	A	AB	AB	AB	AB	A	AB	A	AB	A	AB	AB	AB	A	AB	AB	AB	AB	NA	0PSI.R1	0	5	15	0	0	0	0	20	0	Diploid
2023-PLATE-47_2022-2345_18-Pressure_0PSI_R1_018	Fam2	0 PSI	AB	AB	A	A	AB	AB	AB	A	A	AB	AB	AB	AB	A	A	AB	AB	AB	AB	AB	NA	0PSI.R1	0	6	14	0	0	0	0	20	0	Diploid
2023-PLATE-47_2022-2345_19-Pressure_0PSI_R1_019	Fam2	0 PSI	AB	AB	A	A	AB	A	AB	AB	A	AB	AB	AB	AB	A	A	AB	AB	A	A	AB	NA	0PSI.R1	0	8	12	0	0	0	0	20	0	Diploid
2023-PLATE-47_2022-2345_1-Pressure_0PSI_R1_001	Fam2	0 PSI	AB	AB	AB	A	AB	A	AB	AB	A	AB	AB	AB	AB	AB	A	AB	AB	A	AB	AB	NA	0PSI.R1	0	5	15	0	0	0	0	20	0	Diploid
2023-PLATE-47_2022-2345_20-Pressure_0PSI_R1_020	Fam1	0 PSI	AB	AB	AB	AB	AB	AB	AB	AB	AB	A	AB	AB	AB	A	AB	AB	AB	AB	AB	AB	NA	0PSI.R1	0	2	18	0	0	0	0	20	0	Diploid
2023-PLATE-47_2022-2345_21-Pressure_0PSI_R1_021	Fam2	0 PSI	AB	AB	A	A	AB	AB	AB	AB	AB	AB	AB	A	AB	A	AB	AB	AB	A	AB	AB	NA	0PSI.R1	0	5	15	0	0	0	0	20	0	Diploid
2023-PLATE-47_2022-2345_22-Pressure_0PSI_R1_022	Fam1	0 PSI	AB	AB	AB	AB	AB	AB	AB	AB	AB	AB	AB	A	AB	A	AB	AB	AB	A	AB	A	NA	0PSI.R1	0	4	16	0	0	0	0	20	0	Diploid
2023-PLATE-47_2022-2345_23-Pressure_0PSI_R1_023	Fam1	0 PSI	AB	AB	A	AB	AB	AB	AB	A	AB	AB	A	AB	AB	AB	AB	A	AB	AB	AB	AB	NA	0PSI.R1	0	4	16	0	0	0	0	20	0	Diploid
2023-PLATE-47_2022-2345_24-Pressure_0PSI_R1_024	Fam2	0 PSI	AB	AB	A	A	AB	A	AB	AB	AB	AB	A	AB	AB	AB	A	AB	AB	A	AB	A	NA	0PSI.R1	0	7	13	0	0	0	0	20	0	Diploid
2023-PLATE-47_2022-2345_25-Pressure_0PSI_R1_025	Fam3	0 PSI	AB	AB	AB	AB	AB	AB	AB	A	AB	A	AB	A	AB	A	AB	A	AB	AB	A	AB	NA	0PSI.R1	0	6	14	0	0	0	0	20	0	Diploid
2023-PLATE-47_2022-2345_26-Pressure_0PSI_R1_026	Fam2	0 PSI	AB	AB	A	A	AB	AB	AB	AB	AB	AB	AB	AB	AB	AB	A	AB	AB	A	A	AB	NA	0PSI.R1	0	5	15	0	0	0	0	20	0	Diploid
2023-PLATE-47_2022-2345_27-Pressure_0PSI_R1_027	Fam2	0 PSI	AB	AB	A	A	AB	AB	AB	A	AB	A	AB	AB	AB	AB	AB	AB	AB	A	AB	AB	NA	0PSI.R1	0	5	15	0	0	0	0	20	0	Diploid
2023-PLATE-47_2022-2345_28-Pressure_0PSI_R1_028	Fam2	0 PSI	AB	AB	AB	A	AB	AB	AB	AB	A	AB	AB	A	AB	AB	AB	AB	AB	AB	A	AB	NA	0PSI.R1	0	4	16	0	0	0	0	20	0	Diploid
2023-PLATE-47_2022-2345_29-Pressure_0PSI_R1_029	Fam3	0 PSI	AB	AB	AB	AB	AB	A	AB	A	AB	A	AB	AB	A	AB	AB	AB	AB	AB	AB	A	NA	0PSI.R1	0	5	15	0	0	0	0	20	0	Diploid
2023-PLATE-47_2022-2345_2-Pressure_0PSI_R1_002	Fam1	0 PSI	AB	AB	A	AB	AB	AB	AB	A	A	AB	AB	A	A	A	AB	A	AB	AB	AB	A	NA	0PSI.R1	0	8	12	0	0	0	0	20	0	Diploid
2023-PLATE-47_2022-2345_30-Pressure_0PSI_R1_030	Fam1	0 PSI	AB	AB	AB	AB	AB	A	AB	A	A	AB	AB	AB	AB	AB	AB	A	AB	AB	AB	A	NA	0PSI.R1	0	5	15	0	0	0	0	20	0	Diploid
2023-PLATE-47_2022-2345_31-Pressure_0PSI_R1_031	Fam1	0 PSI	AB	AB	A	AB	A	AB	AB	AB	AB	AB	AB	AB	AB	A	AB	AB	AB	AB	AB	A	NA	0PSI.R1	0	4	16	0	0	0	0	20	0	Diploid
2023-PLATE-47_2022-2345_32-Pressure_0PSI_R1_032	Fam2	0 PSI	AB	AB	AB	NA	AB	A	AB	AB	AB	AB	A	A	AB	A	AB	AB	AB	AB	A	AB	NA	0PSI.R1	1	5	14	0	0	0	0	20	0	Diploid
2023-PLATE-47_2022-2345_33-Pressure_0PSI_R1_033	Fam1	0 PSI	AB	AB	A	AB	AB	A	AB	AB	AB	AB	AB	AB	AB	AB	AB	AB	AB	AB	A	A	NA	0PSI.R1	0	4	16	0	0	0	0	20	0	Diploid
2023-PLATE-47_2022-2345_34-Pressure_0PSI_R1_034	Fam1	0 PSI	AB	AB	A	AB	AB	AB	AB	AB	AB	A	AB	A	AB	AB	AB	AB	AB	AB	AB	AB	NA	0PSI.R1	0	3	17	0	0	0	0	20	0	Diploid
2023-PLATE-47_2022-2345_35-Pressure_0PSI_R1_035	Fam3	0 PSI	AB	AB	AB	AB	AB	A	AB	AB	AB	A	AB	A	A	A	AB	AB	AB	AB	AB	A	NA	0PSI.R1	0	6	14	0	0	0	0	20	0	Diploid
2023-PLATE-47_2022-2345_36-Pressure_0PSI_R1_036	Fam1	0 PSI	AB	AB	A	AB	AB	AB	AB	A	AB	AB	AB	AB	A	A	AB	AB	AB	A	AB	AB	NA	0PSI.R1	0	5	15	0	0	0	0	20	0	Diploid
2023-PLATE-47_2022-2345_37-Pressure_0PSI_R1_037	Fam2	0 PSI	AB	AB	AB	A	AB	AB	AB	A	AB	A	A	A	AB	AB	A	AB	AB	A	AB	A	NA	0PSI.R1	0	8	12	0	0	0	0	20	0	Diploid
2023-PLATE-47_2022-2345_38-Pressure_0PSI_R1_038	Fam3	0 PSI	AB	AB	AB	AB	AB	AB	AB	A	AB	A	AB	A	AB	A	AB	AB	AB	A	A	AB	NA	0PSI.R1	0	6	14	0	0	0	0	20	0	Diploid
2023-PLATE-47_2022-2345_39-Pressure_0PSI_R1_039	Fam2	0 PSI	AB	AB	A	A	AB	A	AB	A	AB	AB	AB	A	AB	A	A	AB	AB	AB	AB	A	NA	0PSI.R1	0	8	12	0	0	0	0	20	0	Diploid
2023-PLATE-47_2022-2345_3-Pressure_0PSI_R1_003	Fam2	0 PSI	AB	AB	AB	A	AB	AB	AB	AB	A	AB	AB	AB	AB	AB	A	AB	AB	AB	A	AB	NA	0PSI.R1	0	4	16	0	0	0	0	20	0	Diploid
2023-PLATE-47_2022-2345_40-Pressure_0PSI_R1_040	Fam1	0 PSI	AB	AB	A	AB	AB	A	AB	AB	A	AB	A	A	AB	A	AB	AB	AB	A	A	A	NA	0PSI.R1	0	9	11	0	0	0	0	20	0	Diploid
2023-PLATE-47_2022-2345_41-Pressure_0PSI_R1_041	Fam1	0 PSI	AB	AB	AB	AB	AB	AB	AB	A	AB	AB	AB	A	A	AB	AB	AB	AB	AB	AB	AB	NA	0PSI.R1	0	3	17	0	0	0	0	20	0	Diploid
2023-PLATE-47_2022-2345_42-Pressure_0PSI_R1_042	Fam2	0 PSI	AB	AB	A	A	AB	AB	AB	AB	AB	AB	AB	AB	AB	AB	A	AB	AB	A	A	AB	NA	0PSI.R1	0	5	15	0	0	0	0	20	0	Diploid
2023-PLATE-47_2022-2345_43-Pressure_0PSI_R1_043	Fam2	0 PSI	AB	AB	AB	NA	AB	AB	AB	A	A	AB	AB	A	AB	A	AB	AB	AB	A	A	AB	NA	0PSI.R1	1	6	13	0	0	0	0	20	0	Diploid
2023-PLATE-47_2022-2345_44-Pressure_0PSI_R1_044	Fam2	0 PSI	AB	AB	A	NA	AB	A	AB	AB	AB	AB	A	A	A	AB	A	AB	AB	NA	A	A	NA	0PSI.R1	2	8	10	0	0	0	0	20	0	Diploid
2023-PLATE-47_2022-2345_45-Pressure_0PSI_R1_045	Fam3	0 PSI	AB	AB	AB	AB	AB	AB	AB	AB	AB	AB	AB	AB	NA	AB	AB	A	AB	AB	AB	AB	NA	0PSI.R1	1	1	18	0	0	0	0	20	0	Diploid
2023-PLATE-47_2022-2345_46-Pressure_0PSI_R1_046	Fam1	0 PSI	AB	AB	A	AB	AB	AB	AB	AB	AB	AB	AB	AB	A	AB	AB	A	AB	AB	A	AB	NA	0PSI.R1	0	4	16	0	0	0	0	20	0	Diploid
2023-PLATE-47_2022-2345_47-Pressure_0PSI_R1_047	Fam3	0 PSI	AB	AB	AB	AB	AB	AB	AB	A	AB	AB	AB	AB	AB	AB	AB	AB	AB	AB	A	A	NA	0PSI.R1	0	3	17	0	0	0	0	20	0	Diploid
2023-PLATE-47_2022-2345_48-Pressure_0PSI_R1_048	Fam3	0 PSI	AB	AB	AB	AB	AB	A	AB	A	AB	AB	AB	AB	AB	A	AB	AB	AB	A	AB	AB	NA	0PSI.R1	0	4	16	0	0	0	0	20	0	Diploid
2023-PLATE-47_2022-2345_49-Pressure_0PSI_R1_049	Fam3	0 PSI	AB	AB	AB	AB	AB	A	AB	A	AB	AB	AB	AB	A	A	AB	A	AB	AB	AB	A	NA	0PSI.R1	0	6	14	0	0	0	0	20	0	Diploid
2023-PLATE-47_2022-2345_4-Pressure_0PSI_R1_004	Fam1	0 PSI	AB	AB	AB	AB	A	AB	AB	A	AB	AB	AB	A	NA	A	AB	AB	AB	AB	A	AB	NA	0PSI.R1	1	5	14	0	0	0	0	20	0	Diploid
2023-PLATE-47_2022-2345_50-Pressure_0PSI_R1_050	Fam3	0 PSI	AB	AB	AB	AB	AB	AB	AB	A	AB	AB	AB	A	NA	AB	AB	A	AB	AB	AB	A	NA	0PSI.R1	1	4	15	0	0	0	0	20	0	Diploid
2023-PLATE-47_2022-2345_51-Pressure_0PSI_R1_051	Fam2	0 PSI	AB	AB	A	NA	AB	AB	AB	A	A	AB	AB	AB	AB	A	AB	AB	AB	A	A	AB	NA	0PSI.R1	1	6	13	0	0	0	0	20	0	Diploid
2023-PLATE-47_2022-2345_52-Pressure_0PSI_R1_052	Fam1	0 PSI	AB	AB	A	AB	AB	A	AB	AB	AB	AB	AB	AB	AB	A	AB	AB	AB	AB	AB	A	NA	0PSI.R1	0	4	16	0	0	0	0	20	0	Diploid
2023-PLATE-47_2022-2345_53-Pressure_0PSI_R1_053	Fam1	0 PSI	AB	AB	NA	AB	AB	A	AB	AB	AB	AB	AB	A	AB	A	AB	A	AB	AB	A	A	NA	0PSI.R1	1	6	13	0	0	0	0	20	0	Diploid
2023-PLATE-47_2022-2345_54-Pressure_0PSI_R1_054	Fam2	0 PSI	AB	AB	AB	A	AB	AB	AB	A	AB	A	A	AB	AB	A	A	AB	AB	A	A	A	NA	0PSI.R1	0	9	11	0	0	0	0	20	0	Diploid
2023-PLATE-47_2022-2345_55-Pressure_0PSI_R1_055	Fam1	0 PSI	AB	AB	A	AB	AB	A	AB	AB	AB	A	AB	AB	AB	AB	AB	AB	AB	A	AB	A	NA	0PSI.R1	0	5	15	0	0	0	0	20	0	Diploid
2023-PLATE-47_2022-2345_56-Pressure_0PSI_R1_056	Fam1	0 PSI	AB	AB	AB	AB	A	A	AB	A	AB	AB	AB	AB	AB	A	AB	AB	AB	AB	AB	AB	NA	0PSI.R1	0	4	16	0	0	0	0	20	0	Diploid
2023-PLATE-47_2022-2345_57-Pressure_0PSI_R1_057	Fam1	0 PSI	AB	AB	AB	AB	A	AB	AB	AB	A	AB	AB	AB	AB	AB	AB	AB	AB	AB	AB	AB	NA	0PSI.R1	0	2	18	0	0	0	0	20	0	Diploid
2023-PLATE-47_2022-2345_58-Pressure_0PSI_R1_058	Fam1	0 PSI	AB	AB	A	AB	A	A	AB	A	AB	A	AB	A	AB	A	AB	AB	AB	AB	AB	A	NA	0PSI.R1	0	8	12	0	0	0	0	20	0	Diploid
2023-PLATE-47_2022-2345_59-Pressure_0PSI_R1_059	Fam3	0 PSI	AB	AB	AB	AB	AB	AB	AB	A	AB	AB	AB	AB	AB	A	AB	A	AB	AB	AB	AB	NA	0PSI.R1	0	3	17	0	0	0	0	20	0	Diploid
2023-PLATE-47_2022-2345_5-Pressure_0PSI_R1_005	Fam2	0 PSI	AB	AB	A	A	AB	AB	AB	AB	AB	AB	AB	A	AB	A	AB	AB	AB	AB	A	AB	NA	0PSI.R1	0	5	15	0	0	0	0	20	0	Diploid
2023-PLATE-47_2022-2345_60-Pressure_0PSI_R1_060	Fam2	0 PSI	AB	AB	AB	A	AB	AB	AB	A	A	AB	AB	AB	AB	A	A	AB	AB	A	A	AB	NA	0PSI.R1	0	7	13	0	0	0	0	20	0	Diploid
2023-PLATE-47_2022-2345_61-Pressure_0PSI_R1_061	Fam3	0 PSI	AB	AB	AB	AB	AB	A	AB	A	AB	A	AB	AB	AB	AB	AB	A	AB	AB	A	A	NA	0PSI.R1	0	6	14	0	0	0	0	20	0	Diploid
2023-PLATE-47_2022-2345_6-Pressure_0PSI_R1_006	Fam2	0 PSI	AB	AB	AB	A	AB	AB	AB	AB	A	AB	AB	A	AB	A	A	AB	AB	AB	A	A	NA	0PSI.R1	0	7	13	0	0	0	0	20	0	Diploid
2023-PLATE-47_2022-2345_7-Pressure_0PSI_R1_007	Fam2	0 PSI	AB	AB	AB	A	AB	AB	AB	AB	AB	A	AB	AB	AB	AB	A	AB	AB	AB	AB	AB	NA	0PSI.R1	0	3	17	0	0	0	0	20	0	Diploid
2023-PLATE-47_2022-2345_8-Pressure_0PSI_R1_008	Fam3	0 PSI	AB	AB	AB	AB	AB	AB	AB	AB	AB	AB	AB	AB	AB	AB	AB	A	AB	AB	AB	A	NA	0PSI.R1	0	2	18	0	0	0	0	20	0	Diploid
2023-PLATE-47_2022-2345_9-Pressure_0PSI_R1_009	Fam2	0 PSI	AB	AB	AB	A	AB	AB	AB	A	A	AB	AB	A	AB	A	A	AB	AB	A	AB	AB	NA	0PSI.R1	0	7	13	0	0	0	0	20	0	Diploid
2023-PLATE-48_2022-2345_100-Pressure_0PSI_R1_100	Fam3	0 PSI	AB	AB	AB	AB	AB	A	AB	AB	AB	AB	AB	AB	A	A	AB	AB	AB	A	A	A	NA	0PSI.R1	0	6	14	0	0	0	0	20	0	Diploid
2023-PLATE-48_2022-2345_101-Pressure_0PSI_R1_101	Fam2	0 PSI	AB	AB	A	A	AB	AB	AB	AB	A	AB	AB	AB	AB	A	AB	AB	AB	AB	AB	AB	NA	0PSI.R1	0	4	16	0	0	0	0	20	0	Diploid
2023-PLATE-48_2022-2345_102-Pressure_0PSI_R1_102	Fam1	0 PSI	AB	AB	A	AB	AB	AB	AB	AB	AB	A	AB	AB	A	AB	AB	A	AB	A	AB	AB	NA	0PSI.R1	0	5	15	0	0	0	0	20	0	Diploid
2023-PLATE-48_2022-2345_103-Pressure_0PSI_R1_103	Fam1	0 PSI	AB	AB	AB	AB	AB	A	AB	AB	AB	A	AB	AB	AB	AB	AB	A	AB	AB	AB	A	NA	0PSI.R1	0	4	16	0	0	0	0	20	0	Diploid
2023-PLATE-48_2022-2345_104-Pressure_0PSI_R1_104	Fam2	0 PSI	AB	AB	A	NA	AB	AB	AB	A	AB	AB	AB	AB	AB	AB	AB	AB	AB	AB	AB	AB	NA	0PSI.R1	1	2	17	0	0	0	0	20	0	Diploid
2023-PLATE-48_2022-2345_105-Pressure_0PSI_R1_105	Fam1	0 PSI	AB	AB	AB	AB	AB	AB	AB	AB	AB	AB	AB	AB	A	AB	AB	AB	AB	A	A	A	NA	0PSI.R1	0	4	16	0	0	0	0	20	0	Diploid
2023-PLATE-48_2022-2345_106-Pressure_0PSI_R1_106	Fam1	0 PSI	AB	AB	A	AB	AB	A	AB	AB	AB	A	AB	AB	AB	AB	AB	AB	AB	A	AB	A	NA	0PSI.R1	0	5	15	0	0	0	0	20	0	Diploid
2023-PLATE-48_2022-2345_107-Pressure_0PSI_R1_107	Fam3	0 PSI	AB	AB	AB	AB	AB	AB	AB	A	AB	A	AB	AB	AB	AB	AB	AB	AB	AB	AB	AB	NA	0PSI.R1	0	2	18	0	0	0	0	20	0	Diploid
2023-PLATE-48_2022-2345_108-Pressure_0PSI_R1_108	Fam3	0 PSI	AB	AB	AB	AB	AB	AB	AB	AB	AB	A	AB	AB	AB	AB	AB	AB	AB	AB	AB	AB	NA	0PSI.R1	0	1	19	0	0	0	0	20	0	Diploid
2023-PLATE-48_2022-2345_109-Pressure_0PSI_R1_109	Fam2	0 PSI	AB	AB	AB	NA	AB	AB	AB	AB	AB	AB	AB	AB	AB	A	A	AB	AB	A	A	AB	NA	0PSI.R1	1	4	15	0	0	0	0	20	0	Diploid
2023-PLATE-48_2022-2345_110-Pressure_0PSI_R1_110	Fam2	0 PSI	AB	AB	AB	NA	AB	AB	AB	NA	A	A	AB	AB	AB	A	AB	AB	AB	AB	A	AB	NA	0PSI.R1	2	4	14	0	0	0	0	20	0	Diploid
2023-PLATE-48_2022-2345_111-Pressure_0PSI_R1_111	Fam3	0 PSI	AB	AB	AB	AB	AB	AB	AB	AB	AB	AB	AB	AB	AB	A	AB	AB	AB	AB	A	AB	NA	0PSI.R1	0	2	18	0	0	0	0	20	0	Diploid
2023-PLATE-48_2022-2345_112-Pressure_0PSI_R1_112	Fam3	0 PSI	AB	AB	AB	AB	AB	A	AB	AB	AB	AB	AB	AB	A	A	AB	A	AB	AB	A	AB	NA	0PSI.R1	0	5	15	0	0	0	0	20	0	Diploid
2023-PLATE-48_2022-2345_113-Pressure_0PSI_R1_113	Fam2	0 PSI	AB	AB	AB	NA	AB	A	AB	A	AB	AB	AB	A	AB	A	AB	AB	AB	A	A	A	NA	0PSI.R1	1	7	12	0	0	0	0	20	0	Diploid
2023-PLATE-48_2022-2345_114-Pressure_0PSI_R1_114	Fam3	0 PSI	AB	AB	AB	AB	AB	AB	AB	AB	AB	AB	AB	AB	AB	A	AB	AB	AB	AB	AB	AB	NA	0PSI.R1	0	1	19	0	0	0	0	20	0	Diploid
2023-PLATE-48_2022-2345_115-Pressure_0PSI_R1_115	Fam2	0 PSI	AB	AB	A	A	AB	AB	AB	AB	AB	A	A	AB	AB	A	A	AB	AB	A	AB	A	NA	0PSI.R1	0	8	12	0	0	0	0	20	0	Diploid
2023-PLATE-48_2022-2345_116-Pressure_0PSI_R1_116	Fam2	0 PSI	AB	AB	A	A	AB	AB	AB	A	AB	AB	A	AB	AB	AB	AB	AB	AB	AB	A	AB	NA	0PSI.R1	0	5	15	0	0	0	0	20	0	Diploid
2023-PLATE-48_2022-2345_118-Pressure_0PSI_R1_118	Fam1	0 PSI	AB	AB	AB	AB	A	A	AB	A	AB	AB	AB	AB	AB	AB	AB	AB	AB	AB	AB	A	NA	0PSI.R1	0	4	16	0	0	0	0	20	0	Diploid
2023-PLATE-48_2022-2345_119-Pressure_0PSI_R1_119	Fam3	0 PSI	AB	AB	AB	AB	AB	AB	AB	AB	AB	A	AB	A	AB	A	AB	A	AB	AB	A	A	NA	0PSI.R1	0	6	14	0	0	0	0	20	0	Diploid
2023-PLATE-48_2022-2345_120-Pressure_0PSI_R1_120	Fam1	0 PSI	AB	AB	AB	NA	NA	NA	AB	AB	A	AB	A	A	AB	A	AB	AB	AB	AB	A	AB	NA	0PSI.R1	3	5	12	0	0	0	0	20	0	Diploid
2023-PLATE-48_2022-2345_121-Pressure_0PSI_R1_121	Fam1	0 PSI	AB	AB	AB	AB	A	A	AB	AB	AB	A	AB	A	AB	A	AB	A	AB	AB	AB	AB	NA	0PSI.R1	0	6	14	0	0	0	0	20	0	Diploid
2023-PLATE-48_2022-2345_122-Pressure_0PSI_R1_122	Fam3	0 PSI	AB	AB	AB	AB	NA	AB	AB	A	AB	AB	AB	A	AB	A	AB	AB	AB	A	AB	AB	NA	0PSI.R1	1	4	15	0	0	0	0	20	0	Diploid
2023-PLATE-48_2022-2345_123-Pressure_0PSI_R1_123	Fam2	0 PSI	AB	AB	AB	A	AB	A	AB	AB	A	AB	AB	AB	A	A	A	AB	AB	AB	AB	AB	NA	0PSI.R1	0	6	14	0	0	0	0	20	0	Diploid
2023-PLATE-48_2022-2345_124-Pressure_0PSI_R1_124	Fam2	0 PSI	AB	AB	AB	A	AB	AB	AB	AB	AB	AB	AB	AB	AB	A	AB	AB	AB	A	A	AB	NA	0PSI.R1	0	4	16	0	0	0	0	20	0	Diploid
2023-PLATE-48_2022-2345_125-Pressure_0PSI_R1_125	Fam3	0 PSI	AB	AB	AB	AB	AB	AB	AB	A	AB	A	AB	AB	AB	A	AB	AB	AB	A	A	A	NA	0PSI.R1	0	6	14	0	0	0	0	20	0	Diploid
2023-PLATE-48_2022-2345_126-Pressure_0PSI_R2_001	Fam1	0 PSI	AB	AB	AB	AB	A	AB	AB	A	AB	AB	A	AB	A	A	AB	AB	AB	AB	A	AB	NA	0PSI.R2	0	6	14	0	0	0	0	20	0	Diploid
2023-PLATE-48_2022-2345_127-Pressure_0PSI_R2_002	Fam1	0 PSI	AB	AB	A	AB	A	AB	AB	A	A	AB	AB	A	A	A	AB	AB	AB	AB	AB	A	NA	0PSI.R2	0	8	12	0	0	0	0	20	0	Diploid
2023-PLATE-48_2022-2345_128-Pressure_0PSI_R2_003	Fam2	0 PSI	AB	AB	AB	A	AB	AB	AB	A	AB	AB	AB	A	AB	AB	A	AB	AB	AB	A	AB	NA	0PSI.R2	0	5	15	0	0	0	0	20	0	Diploid
2023-PLATE-48_2022-2345_129-Pressure_0PSI_R2_004	Fam1	0 PSI	AB	AB	A	AB	A	AB	AB	A	AB	A	AB	A	AB	A	AB	AB	AB	A	AB	AB	NA	0PSI.R2	0	7	13	0	0	0	0	20	0	Diploid
2023-PLATE-48_2022-2345_130-Pressure_0PSI_R2_005	Fam1	0 PSI	AB	AB	A	AB	AB	AB	AB	A	AB	AB	AB	AB	A	A	AB	AB	AB	A	AB	AB	NA	0PSI.R2	0	5	15	0	0	0	0	20	0	Diploid
2023-PLATE-48_2022-2345_131-Pressure_0PSI_R2_006	Fam1	0 PSI	AB	AB	A	AB	AB	AB	AB	AB	A	AB	AB	AB	AB	A	AB	AB	AB	A	A	A	NA	0PSI.R2	0	6	14	0	0	0	0	20	0	Diploid
2023-PLATE-48_2022-2345_132-Pressure_0PSI_R2_007	Fam3	0 PSI	AB	AB	AB	AB	AB	AB	AB	AB	AB	A	AB	A	AB	AB	AB	A	AB	AB	A	A	NA	0PSI.R2	0	5	15	0	0	0	0	20	0	Diploid
2023-PLATE-48_2022-2345_133-Pressure_0PSI_R2_008	Fam3	0 PSI	AB	AB	AB	AB	AB	A	AB	A	AB	AB	AB	AB	A	AB	AB	AB	AB	AB	AB	A	NA	0PSI.R2	0	4	16	0	0	0	0	20	0	Diploid
2023-PLATE-48_2022-2345_134-Pressure_0PSI_R2_009	Fam1	0 PSI	AB	AB	AB	AB	AB	AB	AB	AB	AB	AB	AB	AB	A	AB	AB	AB	AB	AB	AB	A	NA	0PSI.R2	0	2	18	0	0	0	0	20	0	Diploid
2023-PLATE-48_2022-2345_135-Pressure_0PSI_R2_010	Fam2	0 PSI	AB	AB	AB	NA	AB	A	AB	AB	A	AB	AB	AB	AB	AB	A	AB	AB	A	A	AB	NA	0PSI.R2	1	5	14	0	0	0	0	20	0	Diploid
2023-PLATE-48_2022-2345_136-Pressure_0PSI_R2_011	Fam3	0 PSI	AB	AB	AB	AB	AB	A	AB	AB	AB	A	AB	AB	AB	AB	AB	AB	AB	AB	A	A	NA	0PSI.R2	0	4	16	0	0	0	0	20	0	Diploid
2023-PLATE-48_2022-2345_137-Pressure_0PSI_R2_012	Fam1	0 PSI	AB	AB	A	AB	AB	A	AB	A	AB	AB	A	A	AB	AB	AB	AB	AB	A	AB	A	NA	0PSI.R2	0	7	13	0	0	0	0	20	0	Diploid
2023-PLATE-48_2022-2345_138-Pressure_0PSI_R2_013	Fam3	0 PSI	AB	AB	AB	AB	AB	A	AB	AB	AB	A	AB	AB	AB	AB	AB	A	AB	AB	A	A	NA	0PSI.R2	0	5	15	0	0	0	0	20	0	Diploid
2023-PLATE-48_2022-2345_139-Pressure_0PSI_R2_014	Fam2	0 PSI	AB	AB	AB	A	AB	AB	AB	A	AB	AB	AB	AB	AB	AB	A	AB	AB	A	A	AB	NA	0PSI.R2	0	5	15	0	0	0	0	20	0	Diploid
2023-PLATE-48_2022-2345_140-Pressure_0PSI_R2_015	Fam3	0 PSI	AB	AB	AB	AB	AB	A	AB	A	AB	A	AB	AB	A	A	AB	A	AB	AB	AB	AB	NA	0PSI.R2	0	6	14	0	0	0	0	20	0	Diploid
2023-PLATE-48_2022-2345_141-Pressure_0PSI_R2_016	Fam2	0 PSI	AB	AB	AB	A	AB	AB	AB	NA	AB	AB	AB	AB	AB	AB	AB	AB	AB	AB	A	AB	NA	0PSI.R2	1	2	17	0	0	0	0	20	0	Diploid
2023-PLATE-48_2022-2345_142-Pressure_0PSI_R2_017	Fam2	0 PSI	AB	AB	AB	NA	AB	A	AB	NA	AB	AB	AB	AB	A	AB	AB	AB	AB	AB	A	AB	NA	0PSI.R2	2	3	15	0	0	0	0	20	0	Diploid
2023-PLATE-48_2022-2345_143-Pressure_0PSI_R2_018	Fam2	0 PSI	AB	AB	AB	NA	AB	A	AB	A	A	AB	AB	A	A	AB	A	AB	AB	A	AB	AB	NA	0PSI.R2	1	7	12	0	0	0	0	20	0	Diploid
2023-PLATE-48_2022-2345_144-Pressure_0PSI_R2_019	Fam2	0 PSI	AB	AB	AB	NA	AB	A	AB	NA	AB	AB	AB	AB	AB	A	A	AB	AB	AB	A	AB	NA	0PSI.R2	2	4	14	0	0	0	0	20	0	Diploid
2023-PLATE-48_2022-2345_145-Pressure_0PSI_R2_020	Fam3	0 PSI	AB	AB	AB	AB	AB	A	AB	A	AB	A	AB	AB	AB	A	AB	A	AB	AB	A	AB	NA	0PSI.R2	0	6	14	0	0	0	0	20	0	Diploid
2023-PLATE-48_2022-2345_146-Pressure_0PSI_R2_021	Fam2	0 PSI	AB	AB	AB	NA	AB	AB	AB	AB	AB	AB	AB	AB	AB	A	AB	AB	AB	A	A	AB	NA	0PSI.R2	1	3	16	0	0	0	0	20	0	Diploid
2023-PLATE-48_2022-2345_147-Pressure_0PSI_R2_022	Fam1	0 PSI	AB	AB	AB	AB	AB	AB	AB	A	AB	AB	AB	A	AB	A	AB	AB	AB	A	AB	AB	NA	0PSI.R2	0	4	16	0	0	0	0	20	0	Diploid
2023-PLATE-48_2022-2345_148-Pressure_0PSI_R2_023	Fam2	0 PSI	AB	AB	AB	A	AB	AB	AB	AB	AB	AB	A	A	AB	AB	A	AB	AB	AB	AB	AB	NA	0PSI.R2	0	4	16	0	0	0	0	20	0	Diploid
2023-PLATE-48_2022-2345_149-Pressure_0PSI_R2_024	Fam2	0 PSI	AB	AB	A	NA	AB	AB	AB	A	AB	AB	AB	AB	AB	A	A	AB	AB	A	AB	AB	NA	0PSI.R2	1	5	14	0	0	0	0	20	0	Diploid
2023-PLATE-48_2022-2345_150-Pressure_0PSI_R2_025	Fam3	0 PSI	AB	AB	AB	AB	AB	A	AB	AB	AB	A	AB	A	A	AB	AB	A	AB	AB	AB	A	bp shift	0PSI.R2	0	6	14	0	0	0	0	20	0	Diploid
2023-PLATE-48_2022-2345_151-Pressure_0PSI_R2_026	Fam1	0 PSI	AB	AB	A	AB	AB	AB	AB	AB	A	AB	A	AB	AB	AB	AB	A	AB	A	AB	AB	NA	0PSI.R2	0	5	15	0	0	0	0	20	0	Diploid
2023-PLATE-48_2022-2345_152-Pressure_0PSI_R2_027	Fam2	0 PSI	AB	AB	AB	A	AB	AB	AB	A	AB	AB	AB	AB	AB	A	A	AB	AB	A	AB	AB	NA	0PSI.R2	0	5	15	0	0	0	0	20	0	Diploid
2023-PLATE-48_2022-2345_153-Pressure_0PSI_R2_028	Fam1	0 PSI	AB	AB	A	AB	A	NA	AB	NA	NA	A	AB	AB	AB	AB	AB	A	NA	AB	AB	NA	NA	0PSI.R2	5	4	11	0	0	0	0	20	0	Diploid
2023-PLATE-48_2022-2345_154-Pressure_0PSI_R2_029	Fam3	0 PSI	AB	AB	AB	AB	AB	AB	AB	A	AB	AB	AB	A	AB	A	AB	AB	AB	A	A	A	NA	0PSI.R2	0	6	14	0	0	0	0	20	0	Diploid
2023-PLATE-48_2022-2345_155-Pressure_0PSI_R2_030	Fam1	0 PSI	AB	AB	AB	AB	A	AB	AB	A	A	AB	AB	AB	A	A	AB	AB	AB	AB	AB	AB	NA	0PSI.R2	0	5	15	0	0	0	0	20	0	Diploid
2023-PLATE-48_2022-2345_62-Pressure_0PSI_R1_062	Fam3	0 PSI	AB	AB	AB	AB	AB	A	AB	AB	AB	A	AB	AB	AB	A	AB	AB	AB	AB	A	A	NA	0PSI.R1	0	5	15	0	0	0	0	20	0	Diploid
2023-PLATE-48_2022-2345_63-Pressure_0PSI_R1_063	Fam2	0 PSI	AB	AB	AB	NA	AB	A	AB	NA	AB	AB	AB	AB	AB	A	AB	AB	AB	AB	AB	AB	NA	0PSI.R1	2	2	16	0	0	0	0	20	0	Diploid
2023-PLATE-48_2022-2345_64-Pressure_0PSI_R1_064	Fam1	0 PSI	AB	AB	A	AB	AB	AB	AB	A	AB	AB	A	AB	AB	A	AB	AB	AB	AB	A	A	NA	0PSI.R1	0	6	14	0	0	0	0	20	0	Diploid
2023-PLATE-48_2022-2345_65-Pressure_0PSI_R1_065	Fam3	0 PSI	AB	AB	AB	AB	AB	A	AB	AB	AB	A	AB	A	AB	A	AB	A	AB	AB	A	A	NA	0PSI.R1	0	7	13	0	0	0	0	20	0	Diploid
2023-PLATE-48_2022-2345_66-Pressure_0PSI_R1_066	Fam1	0 PSI	AB	AB	A	AB	A	AB	AB	A	AB	AB	AB	A	A	AB	AB	AB	AB	AB	AB	AB	NA	0PSI.R1	0	5	15	0	0	0	0	20	0	Diploid
2023-PLATE-48_2022-2345_67-Pressure_0PSI_R1_067	Fam2	0 PSI	AB	AB	AB	A	AB	AB	AB	NA	AB	AB	AB	AB	AB	AB	A	AB	AB	A	AB	AB	NA	0PSI.R1	1	3	16	0	0	0	0	20	0	Diploid
2023-PLATE-48_2022-2345_68-Pressure_0PSI_R1_068	Fam3	0 PSI	AB	AB	AB	AB	AB	AB	AB	A	AB	AB	AB	AB	AB	A	AB	A	AB	AB	AB	AB	NA	0PSI.R1	0	3	17	0	0	0	0	20	0	Diploid
2023-PLATE-48_2022-2345_69-Pressure_0PSI_R1_069	Fam2	0 PSI	AB	AB	AB	NA	AB	AB	AB	AB	A	AB	AB	AB	AB	AB	AB	AB	AB	A	A	AB	NA	0PSI.R1	1	3	16	0	0	0	0	20	0	Diploid
2023-PLATE-48_2022-2345_70-Pressure_0PSI_R1_070	Fam3	0 PSI	AB	AB	AB	AB	AB	A	AB	A	AB	AB	AB	AB	AB	AB	AB	A	AB	AB	AB	AB	NA	0PSI.R1	0	3	17	0	0	0	0	20	0	Diploid
2023-PLATE-48_2022-2345_71-Pressure_0PSI_R1_071	Fam3	0 PSI	AB	AB	AB	AB	AB	A	AB	AB	AB	AB	AB	AB	AB	AB	AB	A	AB	AB	AB	A	NA	0PSI.R1	0	3	17	0	0	0	0	20	0	Diploid
2023-PLATE-48_2022-2345_72-Pressure_0PSI_R1_072	Fam2	0 PSI	AB	AB	AB	NA	AB	A	AB	AB	A	AB	AB	AB	A	A	AB	AB	AB	A	AB	A	NA	0PSI.R1	1	6	13	0	0	0	0	20	0	Diploid
2023-PLATE-48_2022-2345_73-Pressure_0PSI_R1_073	Fam2	0 PSI	AB	AB	AB	A	AB	A	AB	A	AB	AB	AB	AB	AB	AB	A	AB	AB	AB	A	AB	NA	0PSI.R1	0	5	15	0	0	0	0	20	0	Diploid
2023-PLATE-48_2022-2345_74-Pressure_0PSI_R1_074	Fam3	0 PSI	AB	AB	AB	AB	AB	AB	AB	A	AB	AB	AB	AB	AB	A	AB	A	AB	AB	AB	A	NA	0PSI.R1	0	4	16	0	0	0	0	20	0	Diploid
2023-PLATE-48_2022-2345_75-Pressure_0PSI_R1_075	Fam3	0 PSI	AB	AB	AB	AB	AB	A	AB	AB	AB	A	AB	AB	AB	AB	AB	AB	AB	AB	AB	AB	NA	0PSI.R1	0	2	18	0	0	0	0	20	0	Diploid
2023-PLATE-48_2022-2345_76-Pressure_0PSI_R1_076	Fam1	0 PSI	AB	AB	A	AB	AB	AB	AB	AB	AB	AB	AB	AB	AB	A	AB	AB	AB	AB	A	A	NA	0PSI.R1	0	4	16	0	0	0	0	20	0	Diploid
2023-PLATE-48_2022-2345_77-Pressure_0PSI_R1_077	Fam2	0 PSI	AB	AB	A	A	AB	AB	AB	AB	A	AB	AB	AB	AB	AB	AB	AB	AB	AB	A	AB	NA	0PSI.R1	0	4	16	0	0	0	0	20	0	Diploid
2023-PLATE-48_2022-2345_78-Pressure_0PSI_R1_078	Fam1	0 PSI	AB	AB	A	AB	AB	A	AB	A	AB	AB	AB	AB	AB	AB	AB	AB	AB	AB	AB	AB	bp shift	0PSI.R1	0	3	17	0	0	0	0	20	0	Diploid
2023-PLATE-48_2022-2345_79-Pressure_0PSI_R1_079	Fam1	0 PSI	AB	AB	AB	AB	AB	AB	AB	AB	A	AB	AB	A	A	A	AB	AB	AB	AB	AB	A	NA	0PSI.R1	0	5	15	0	0	0	0	20	0	Diploid
2023-PLATE-48_2022-2345_80-Pressure_0PSI_R1_080	Fam3	0 PSI	AB	AB	AB	AB	AB	A	AB	A	AB	A	AB	AB	AB	A	AB	A	AB	AB	AB	A	NA	0PSI.R1	0	6	14	0	0	0	0	20	0	Diploid
2023-PLATE-48_2022-2345_81-Pressure_0PSI_R1_081	Fam2	0 PSI	AB	AB	A	NA	AB	AB	AB	AB	AB	AB	A	A	AB	A	AB	AB	AB	A	A	AB	NA	0PSI.R1	1	6	13	0	0	0	0	20	0	Diploid
2023-PLATE-48_2022-2345_82-Pressure_0PSI_R1_082	Fam1	0 PSI	AB	AB	A	AB	A	AB	AB	AB	AB	A	AB	AB	AB	A	AB	A	AB	AB	A	AB	NA	0PSI.R1	0	6	14	0	0	0	0	20	0	Diploid
2023-PLATE-48_2022-2345_83-Pressure_0PSI_R1_083	Fam2	0 PSI	AB	AB	A	A	AB	AB	AB	A	AB	AB	AB	A	AB	A	AB	AB	AB	AB	A	AB	NA	0PSI.R1	0	6	14	0	0	0	0	20	0	Diploid
2023-PLATE-48_2022-2345_84-Pressure_0PSI_R1_084	Fam3	0 PSI	AB	AB	AB	AB	AB	A	AB	AB	AB	A	AB	AB	A	AB	AB	AB	AB	A	A	AB	NA	0PSI.R1	0	5	15	0	0	0	0	20	0	Diploid
2023-PLATE-48_2022-2345_85-Pressure_0PSI_R1_085	Fam3	0 PSI	AB	AB	AB	AB	AB	AB	AB	A	AB	AB	AB	AB	AB	A	AB	AB	AB	A	A	AB	NA	0PSI.R1	0	4	16	0	0	0	0	20	0	Diploid
2023-PLATE-48_2022-2345_86-Pressure_0PSI_R1_086	Fam2	0 PSI	AB	AB	AB	NA	AB	AB	AB	AB	AB	AB	AB	AB	AB	AB	A	AB	AB	AB	A	AB	NA	0PSI.R1	1	2	17	0	0	0	0	20	0	Diploid
2023-PLATE-48_2022-2345_87-Pressure_0PSI_R1_087	Fam2	0 PSI	AB	AB	AB	NA	AB	A	AB	A	A	A	AB	AB	AB	A	AB	AB	AB	AB	AB	AB	NA	0PSI.R1	1	5	14	0	0	0	0	20	0	Diploid
2023-PLATE-48_2022-2345_88-Pressure_0PSI_R1_088	Fam2	0 PSI	AB	AB	A	NA	AB	AB	AB	NA	A	AB	AB	A	AB	AB	A	AB	AB	AB	A	AB	NA	0PSI.R1	2	5	13	0	0	0	0	20	0	Diploid
2023-PLATE-48_2022-2345_89-Pressure_0PSI_R1_089	Fam1	0 PSI	AB	AB	A	AB	A	AB	AB	A	AB	A	AB	A	A	A	AB	AB	AB	AB	A	A	NA	0PSI.R1	0	9	11	0	0	0	0	20	0	Diploid
2023-PLATE-48_2022-2345_90-Pressure_0PSI_R1_090	Fam3	0 PSI	AB	AB	AB	AB	AB	A	AB	AB	AB	AB	AB	AB	A	AB	AB	A	AB	AB	A	AB	bp shift	0PSI.R1	0	4	16	0	0	0	0	20	0	Diploid
2023-PLATE-48_2022-2345_91-Pressure_0PSI_R1_091	Fam2	0 PSI	AB	AB	AB	NA	AB	A	AB	A	A	AB	AB	A	A	AB	A	AB	AB	AB	AB	AB	NA	0PSI.R1	1	6	13	0	0	0	0	20	0	Diploid
2023-PLATE-48_2022-2345_92-Pressure_0PSI_R1_092	Fam2	0 PSI	AB	AB	AB	NA	AB	A	AB	A	A	AB	AB	A	AB	A	AB	AB	AB	AB	AB	AB	NA	0PSI.R1	1	5	14	0	0	0	0	20	0	Diploid
2023-PLATE-48_2022-2345_93-Pressure_0PSI_R1_093	Fam3	0 PSI	AB	AB	AB	AB	AB	AB	AB	A	AB	AB	AB	A	AB	AB	AB	A	AB	AB	A	A	NA	0PSI.R1	0	5	15	0	0	0	0	20	0	Diploid
2023-PLATE-48_2022-2345_94-Pressure_0PSI_R1_094	Fam1	0 PSI	AB	AB	AB	AB	A	A	AB	AB	AB	AB	AB	A	AB	A	AB	AB	AB	A	A	A	NA	0PSI.R1	0	7	13	0	0	0	0	20	0	Diploid
2023-PLATE-48_2022-2345_95-Pressure_0PSI_R1_095	Fam1	0 PSI	AB	AB	A	AB	AB	AB	AB	AB	AB	AB	AB	A	AB	AB	AB	A	AB	AB	AB	AB	NA	0PSI.R1	0	3	17	0	0	0	0	20	0	Diploid
2023-PLATE-48_2022-2345_96-Pressure_0PSI_R1_096	Fam3	0 PSI	AB	AB	AB	AB	AB	A	AB	A	AB	AB	AB	AB	A	A	AB	AB	AB	A	AB	AB	NA	0PSI.R1	0	5	15	0	0	0	0	20	0	Diploid
2023-PLATE-48_2022-2345_97-Pressure_0PSI_R1_097	Fam2	0 PSI	AB	AB	AB	A	AB	AB	AB	A	A	AB	AB	AB	AB	AB	AB	AB	AB	AB	AB	AB	NA	0PSI.R1	0	3	17	0	0	0	0	20	0	Diploid
2023-PLATE-48_2022-2345_98-Pressure_0PSI_R1_098	Fam2	0 PSI	AB	AB	A	A	AB	AB	AB	A	AB	A	AB	A	AB	AB	A	AB	AB	A	A	A	NA	0PSI.R1	0	9	11	0	0	0	0	20	0	Diploid
2023-PLATE-48_2022-2345_99-Pressure_0PSI_R1_099	Fam2	0 PSI	AB	AB	AB	A	AB	AB	AB	AB	AB	AB	AB	AB	AB	AB	A	AB	AB	A	AB	A	NA	0PSI.R1	0	4	16	0	0	0	0	20	0	Diploid
2023-PLATE-49_2022-2345_156-Pressure_0PSI_R2_031	Fam2	0 PSI	AB	AB	AB	A	AB	A	NA	A	AB	AB	A	AB	A	AB	A	AB	AB	AB	A	A	NA	0PSI.R2	1	8	11	0	0	0	0	20	0	Diploid
2023-PLATE-49_2022-2345_157-Pressure_0PSI_R2_032	Fam3	0 PSI	AB	AB	AB	AB	AB	AB	AB	AB	AB	A	AB	AB	NA	AB	AB	A	AB	AB	A	A	NA	0PSI.R2	1	4	15	0	0	0	0	20	0	Diploid
2023-PLATE-49_2022-2345_158-Pressure_0PSI_R2_033	Fam3	0 PSI	AB	AB	AB	AB	AB	AB	AB	A	AB	AB	AB	A	AB	A	AB	AB	AB	A	A	AB	NA	0PSI.R2	0	5	15	0	0	0	0	20	0	Diploid
2023-PLATE-49_2022-2345_159-Pressure_0PSI_R2_034	Fam3	0 PSI	AB	AB	AB	AB	AB	A	AB	A	AB	A	AB	AB	AB	A	AB	A	AB	AB	AB	AB	NA	0PSI.R2	0	5	15	0	0	0	0	20	0	Diploid
2023-PLATE-49_2022-2345_160-Pressure_0PSI_R2_035	Fam1	0 PSI	AB	AB	AB	AB	AB	A	AB	AB	A	AB	AB	A	AB	A	AB	AB	AB	AB	AB	AB	NA	0PSI.R2	0	4	16	0	0	0	0	20	0	Diploid
2023-PLATE-49_2022-2345_161-Pressure_0PSI_R2_036	Fam2	0 PSI	AB	AB	A	NA	AB	A	AB	A	AB	AB	AB	A	AB	AB	AB	AB	AB	AB	AB	AB	NA	0PSI.R2	1	4	15	0	0	0	0	20	0	Diploid
2023-PLATE-49_2022-2345_162-Pressure_0PSI_R2_037	Fam3	0 PSI	AB	AB	AB	AB	AB	AB	AB	AB	AB	A	AB	AB	AB	A	AB	A	AB	AB	A	AB	NA	0PSI.R2	0	4	16	0	0	0	0	20	0	Diploid
2023-PLATE-49_2022-2345_163-Pressure_0PSI_R2_038	Fam1	0 PSI	AB	AB	A	AB	A	AB	AB	AB	AB	A	AB	AB	A	AB	AB	AB	AB	AB	AB	A	NA	0PSI.R2	0	5	15	0	0	0	0	20	0	Diploid
2023-PLATE-49_2022-2345_164-Pressure_0PSI_R2_039	Fam3	0 PSI	AB	AB	AB	AB	AB	AB	AB	AB	AB	A	AB	AB	AB	A	AB	AB	AB	A	A	AB	NA	0PSI.R2	0	4	16	0	0	0	0	20	0	Diploid
2023-PLATE-49_2022-2345_165-Pressure_0PSI_R2_040	Fam3	0 PSI	AB	AB	AB	AB	AB	AB	AB	AB	AB	AB	AB	AB	AB	A	AB	AB	AB	AB	A	A	NA	0PSI.R2	0	3	17	0	0	0	0	20	0	Diploid
2023-PLATE-49_2022-2345_166-Pressure_0PSI_R2_041	Fam2	0 PSI	AB	NA	AB	A	AB	A	AB	A	AB	AB	AB	A	AB	A	AB	AB	AB	A	AB	AB	NA	0PSI.R2	1	6	13	0	0	0	0	20	0	Diploid
2023-PLATE-49_2022-2345_167-Pressure_0PSI_R2_042	Fam3	0 PSI	AB	AB	AB	AB	AB	A	AB	A	AB	AB	AB	A	A	AB	AB	A	AB	AB	A	A	NA	0PSI.R2	0	7	13	0	0	0	0	20	0	Diploid
2023-PLATE-49_2022-2345_168-Pressure_0PSI_R2_043	Fam1	0 PSI	AB	AB	AB	AB	AB	AB	AB	AB	AB	AB	AB	AB	AB	AB	AB	AB	AB	AB	AB	A	NA	0PSI.R2	0	1	19	0	0	0	0	20	0	Diploid
2023-PLATE-49_2022-2345_169-Pressure_0PSI_R2_044	Fam2	0 PSI	AB	AB	AB	NA	AB	AB	AB	A	A	AB	AB	AB	AB	A	A	AB	AB	AB	AB	AB	NA	0PSI.R2	1	4	15	0	0	0	0	20	0	Diploid
2023-PLATE-49_2022-2345_170-Pressure_0PSI_R2_045	Fam3	0 PSI	AB	AB	AB	AB	AB	A	AB	AB	AB	AB	AB	AB	AB	AB	AB	A	AB	AB	A	A	bp shift	0PSI.R2	0	4	16	0	0	0	0	20	0	Diploid
2023-PLATE-49_2022-2345_171-Pressure_0PSI_R2_046	Fam2	0 PSI	AB	AB	AB	NA	AB	A	AB	AB	AB	AB	AB	AB	AB	A	A	AB	AB	A	A	AB	NA	0PSI.R2	1	5	14	0	0	0	0	20	0	Diploid
2023-PLATE-49_2022-2345_172-Pressure_0PSI_R2_047	Fam2	0 PSI	AB	AB	AB	A	AB	AB	AB	A	AB	A	A	AB	AB	AB	A	AB	AB	AB	AB	AB	NA	0PSI.R2	0	5	15	0	0	0	0	20	0	Diploid
2023-PLATE-49_2022-2345_173-Pressure_0PSI_R2_048	Fam3	0 PSI	AB	AB	AB	AB	AB	A	AB	A	AB	AB	AB	A	A	AB	AB	A	AB	AB	A	A	NA	0PSI.R2	0	7	13	0	0	0	0	20	0	Diploid
2023-PLATE-49_2022-2345_174-Pressure_0PSI_R2_049	Fam2	0 PSI	AB	AB	AB	A	AB	A	AB	A	AB	AB	AB	AB	A	AB	A	AB	AB	AB	A	AB	NA	0PSI.R2	0	6	14	0	0	0	0	20	0	Diploid
2023-PLATE-49_2022-2345_175-Pressure_0PSI_R2_050	Fam3	0 PSI	AB	AB	AB	AB	AB	AB	AB	A	AB	AB	AB	AB	AB	AB	AB	A	AB	AB	A	AB	NA	0PSI.R2	0	3	17	0	0	0	0	20	0	Diploid
2023-PLATE-49_2022-2345_176-Pressure_0PSI_R2_051	Fam1	0 PSI	AB	AB	AB	AB	AB	A	AB	AB	AB	A	AB	AB	AB	AB	AB	AB	AB	AB	AB	AB	NA	0PSI.R2	0	2	18	0	0	0	0	20	0	Diploid
2023-PLATE-49_2022-2345_177-Pressure_0PSI_R2_052	Fam1	0 PSI	AB	AB	A	AB	A	AB	AB	A	AB	AB	A	AB	A	AB	AB	AB	AB	AB	A	A	NA	0PSI.R2	0	7	13	0	0	0	0	20	0	Diploid
2023-PLATE-49_2022-2345_178-Pressure_0PSI_R2_053	Fam1	0 PSI	AB	AB	AB	AB	AB	AB	AB	AB	A	AB	AB	AB	AB	A	AB	AB	AB	AB	A	AB	NA	0PSI.R2	0	3	17	0	0	0	0	20	0	Diploid
2023-PLATE-49_2022-2345_179-Pressure_0PSI_R2_054	Fam3	0 PSI	AB	AB	AB	AB	AB	AB	AB	AB	AB	A	AB	AB	AB	AB	AB	A	AB	AB	A	A	NA	0PSI.R2	0	4	16	0	0	0	0	20	0	Diploid
2023-PLATE-49_2022-2345_180-Pressure_0PSI_R2_055	Fam2	0 PSI	AB	AB	AB	NA	AB	A	AB	AB	AB	A	AB	AB	AB	A	AB	AB	AB	AB	AB	A	bp shift	0PSI.R2	1	4	15	0	0	0	0	20	0	Diploid
2023-PLATE-49_2022-2345_181-Pressure_0PSI_R2_056	Fam3	0 PSI	AB	AB	AB	AB	AB	AB	AB	AB	AB	A	AB	A	AB	A	AB	A	AB	AB	AB	AB	NA	0PSI.R2	0	4	16	0	0	0	0	20	0	Diploid
2023-PLATE-49_2022-2345_182-Pressure_0PSI_R2_057	Fam2	0 PSI	AB	AB	AB	A	AB	AB	AB	A	AB	AB	AB	AB	AB	A	A	AB	AB	AB	A	AB	NA	0PSI.R2	0	5	15	0	0	0	0	20	0	Diploid
2023-PLATE-49_2022-2345_183-Pressure_0PSI_R2_058	Fam1	0 PSI	AB	AB	AB	AB	AB	AB	AB	A	AB	A	AB	A	A	AB	AB	AB	AB	AB	AB	AB	NA	0PSI.R2	0	4	16	0	0	0	0	20	0	Diploid
2023-PLATE-49_2022-2345_184-Pressure_0PSI_R2_059	Fam3	0 PSI	AB	AB	AB	AB	AB	AB	AB	AB	AB	AB	AB	AB	AB	A	AB	A	AB	AB	A	A	NA	0PSI.R2	0	4	16	0	0	0	0	20	0	Diploid
2023-PLATE-49_2022-2345_185-Pressure_0PSI_R2_060	Fam3	0 PSI	AB	AB	AB	AB	AB	AB	AB	AB	AB	AB	AB	A	AB	AB	AB	AB	AB	A	A	AB	NA	0PSI.R2	0	3	17	0	0	0	0	20	0	Diploid
2023-PLATE-49_2022-2345_186-Pressure_0PSI_R2_061	Fam1	0 PSI	AB	AB	A	AB	A	AB	AB	AB	AB	AB	AB	A	AB	A	AB	AB	AB	AB	AB	A	NA	0PSI.R2	0	5	15	0	0	0	0	20	0	Diploid
2023-PLATE-49_2022-2345_187-Pressure_0PSI_R2_062	Fam2	0 PSI	AB	AB	AB	A	AB	AB	AB	AB	AB	A	A	AB	AB	A	NA	AB	AB	AB	A	A	NA	0PSI.R2	1	6	13	0	0	0	0	20	0	Diploid
2023-PLATE-49_2022-2345_188-Pressure_0PSI_R2_063	Fam1	0 PSI	AB	AB	A	AB	AB	AB	AB	AB	AB	AB	A	A	A	A	AB	AB	AB	A	A	AB	NA	0PSI.R2	0	7	13	0	0	0	0	20	0	Diploid
2023-PLATE-49_2022-2345_189-Pressure_0PSI_R2_064	Fam1	0 PSI	AB	AB	AB	AB	AB	A	AB	AB	AB	AB	AB	AB	AB	AB	AB	AB	AB	AB	AB	A	NA	0PSI.R2	0	2	18	0	0	0	0	20	0	Diploid
2023-PLATE-49_2022-2345_190-Pressure_0PSI_R2_065	Fam1	0 PSI	AB	AB	A	AB	AB	A	AB	AB	A	AB	A	A	AB	A	AB	A	AB	AB	A	AB	NA	0PSI.R2	0	8	12	0	0	0	0	20	0	Diploid
2023-PLATE-49_2022-2345_191-Pressure_0PSI_R2_066	Fam3	0 PSI	AB	AB	AB	AB	AB	AB	AB	AB	AB	A	AB	AB	AB	A	AB	A	AB	AB	AB	AB	NA	0PSI.R2	0	3	17	0	0	0	0	20	0	Diploid
2023-PLATE-49_2022-2345_192-Pressure_0PSI_R2_067	Fam1	0 PSI	AB	AB	A	AB	A	AB	AB	A	A	AB	AB	A	AB	AB	AB	AB	AB	A	A	A	NA	0PSI.R2	0	8	12	0	0	0	0	20	0	Diploid
2023-PLATE-49_2022-2345_193-Pressure_0PSI_R2_068	Fam3	0 PSI	AB	AB	AB	AB	AB	AB	AB	A	AB	AB	AB	A	AB	AB	AB	A	AB	AB	A	A	NA	0PSI.R2	0	5	15	0	0	0	0	20	0	Diploid
2023-PLATE-49_2022-2345_194-Pressure_0PSI_R2_069	Fam2	0 PSI	AB	AB	AB	NA	AB	A	AB	A	AB	AB	AB	AB	A	AB	A	AB	AB	AB	A	AB	NA	0PSI.R2	1	5	14	0	0	0	0	20	0	Diploid
2023-PLATE-49_2022-2345_195-Pressure_0PSI_R2_070	Fam1	0 PSI	AB	AB	A	AB	A	AB	AB	AB	AB	AB	AB	AB	A	A	AB	A	AB	A	AB	A	NA	0PSI.R2	0	7	13	0	0	0	0	20	0	Diploid
2023-PLATE-49_2022-2345_196-Pressure_0PSI_R2_071	Fam1	0 PSI	AB	AB	AB	AB	AB	A	AB	A	AB	AB	AB	AB	AB	A	AB	AB	AB	AB	AB	AB	NA	0PSI.R2	0	3	17	0	0	0	0	20	0	Diploid
2023-PLATE-49_2022-2345_197-Pressure_0PSI_R2_072	Fam1	0 PSI	AB	AB	A	AB	A	A	AB	AB	A	AB	AB	AB	AB	AB	AB	A	AB	AB	A	AB	NA	0PSI.R2	0	6	14	0	0	0	0	20	0	Diploid
2023-PLATE-49_2022-2345_198-Pressure_0PSI_R2_073	Fam1	0 PSI	AB	AB	A	AB	A	A	AB	AB	A	AB	AB	AB	AB	AB	AB	AB	AB	A	A	AB	NA	0PSI.R2	0	6	14	0	0	0	0	20	0	Diploid
2023-PLATE-49_2022-2345_199-Pressure_0PSI_R2_074	Fam2	0 PSI	AB	AB	A	NA	AB	A	AB	AB	AB	A	A	AB	AB	A	AB	AB	AB	AB	A	AB	NA	0PSI.R2	1	6	13	0	0	0	0	20	0	Diploid
2023-PLATE-49_2022-2345_200-Pressure_0PSI_R2_075	Fam2	0 PSI	AB	AB	AB	A	AB	A	AB	AB	A	AB	AB	AB	A	A	AB	AB	AB	A	A	AB	NA	0PSI.R2	0	7	13	0	0	0	0	20	0	Diploid
2023-PLATE-49_2022-2345_201-Pressure_0PSI_R2_076	Fam1	0 PSI	AB	AB	AB	NA	AB	A	AB	A	AB	AB	AB	AB	AB	A	AB	AB	AB	AB	AB	AB	NA	0PSI.R2	1	3	16	0	0	0	0	20	0	Diploid
2023-PLATE-49_2022-2345_202-Pressure_0PSI_R2_077	Fam1	0 PSI	AB	AB	A	AB	AB	A	AB	A	AB	A	A	AB	AB	AB	AB	A	AB	AB	A	AB	NA	0PSI.R2	0	7	13	0	0	0	0	20	0	Diploid
2023-PLATE-49_2022-2345_203-Pressure_0PSI_R2_078	Fam2	0 PSI	AB	NA	AB	NA	AB	A	AB	AB	AB	AB	A	AB	AB	AB	AB	AB	AB	A	A	A	NA	0PSI.R2	2	5	13	0	0	0	0	20	0	Diploid
2023-PLATE-49_2022-2345_204-Pressure_0PSI_R2_079	Fam2	0 PSI	AB	AB	A	NA	AB	A	AB	A	AB	AB	AB	AB	A	A	A	AB	AB	AB	A	AB	NA	0PSI.R2	1	7	12	0	0	0	0	20	0	Diploid
2023-PLATE-49_2022-2345_205-Pressure_0PSI_R2_080	Fam3	0 PSI	AB	AB	AB	AB	AB	AB	AB	AB	AB	AB	AB	AB	AB	A	AB	A	AB	AB	A	AB	NA	0PSI.R2	0	3	17	0	0	0	0	20	0	Diploid
2023-PLATE-49_2022-2345_206-Pressure_0PSI_R2_081	Fam2	0 PSI	AB	AB	A	NA	AB	AB	AB	AB	A	AB	AB	A	AB	A	AB	AB	AB	AB	AB	AB	NA	0PSI.R2	1	4	15	0	0	0	0	20	0	Diploid
2023-PLATE-49_2022-2345_207-Pressure_0PSI_R2_082	Fam2	0 PSI	AB	AB	A	A	AB	AB	AB	AB	A	AB	AB	AB	AB	A	AB	AB	AB	A	A	A	NA	0PSI.R2	0	7	13	0	0	0	0	20	0	Diploid
2023-PLATE-49_2022-2345_208-Pressure_0PSI_R2_083	Fam2	0 PSI	AB	AB	AB	A	AB	AB	AB	AB	AB	AB	AB	AB	AB	A	AB	AB	AB	AB	AB	A	NA	0PSI.R2	0	3	17	0	0	0	0	20	0	Diploid
2023-PLATE-49_2022-2345_209-Pressure_0PSI_R2_084	Fam2	0 PSI	AB	AB	AB	NA	AB	A	AB	A	AB	AB	AB	AB	AB	A	AB	AB	AB	A	AB	AB	NA	0PSI.R2	1	4	15	0	0	0	0	20	0	Diploid
2023-PLATE-49_2022-2345_210-Pressure_0PSI_R2_085	Fam3	0 PSI	AB	AB	AB	AB	AB	A	AB	A	AB	AB	AB	AB	A	AB	AB	A	AB	AB	A	A	NA	0PSI.R2	0	6	14	0	0	0	0	20	0	Diploid
2023-PLATE-49_2022-2345_211-Pressure_0PSI_R2_086	Fam3	0 PSI	AB	AB	AB	AB	AB	A	AB	A	AB	A	AB	AB	AB	A	AB	A	AB	AB	AB	AB	NA	0PSI.R2	0	5	15	0	0	0	0	20	0	Diploid
2023-PLATE-49_2022-2345_212-Pressure_0PSI_R2_087	Fam1	0 PSI	AB	AB	A	AB	A	AB	AB	A	AB	AB	AB	AB	AB	AB	AB	AB	AB	AB	A	A	NA	0PSI.R2	0	5	15	0	0	0	0	20	0	Diploid
2023-PLATE-49_2022-2345_213-Pressure_0PSI_R2_088	Fam1	0 PSI	AB	AB	AB	AB	AB	AB	AB	A	AB	AB	AB	AB	AB	A	AB	AB	AB	AB	A	A	NA	0PSI.R2	0	4	16	0	0	0	0	20	0	Diploid
2023-PLATE-49_2022-2345_214-Pressure_0PSI_R2_089	Fam3	0 PSI	AB	AB	AB	AB	AB	A	AB	AB	AB	AB	AB	AB	A	AB	AB	A	AB	AB	AB	AB	NA	0PSI.R2	0	3	17	0	0	0	0	20	0	Diploid
2023-PLATE-49_2022-2345_215-Pressure_0PSI_R2_090	Fam3	0 PSI	AB	AB	AB	AB	AB	AB	AB	AB	AB	AB	AB	AB	AB	A	AB	A	AB	AB	A	A	NA	0PSI.R2	0	4	16	0	0	0	0	20	0	Diploid
2023-PLATE-49_2022-2345_216-Pressure_0PSI_R2_091	Fam1	0 PSI	AB	AB	A	AB	A	A	AB	AB	AB	A	AB	AB	AB	A	AB	AB	AB	A	A	AB	NA	0PSI.R2	0	7	13	0	0	0	0	20	0	Diploid
2023-PLATE-49_2022-2345_217-Pressure_0PSI_R2_092	Fam2	0 PSI	AB	AB	AB	A	AB	A	AB	AB	AB	A	A	A	AB	A	A	AB	AB	A	A	AB	NA	0PSI.R2	0	9	11	0	0	0	0	20	0	Diploid
2023-PLATE-49_2022-2345_218-Pressure_0PSI_R2_093	Fam2	0 PSI	AB	AB	AB	A	AB	A	AB	A	AB	AB	AB	AB	A	AB	A	AB	AB	AB	AB	AB	NA	0PSI.R2	0	5	15	0	0	0	0	20	0	Diploid
2023-PLATE-49_2022-2345_219-Pressure_0PSI_R2_094	Fam1	0 PSI	AB	AB	AB	AB	AB	A	AB	A	AB	AB	A	A	AB	A	AB	AB	AB	AB	A	AB	NA	0PSI.R2	0	6	14	0	0	0	0	20	0	Diploid
2023-PLATE-49_2022-2345_220-Pressure_0PSI_R2_095	Fam2	0 PSI	AB	AB	AB	A	AB	A	AB	A	AB	AB	AB	AB	AB	A	AB	AB	AB	AB	AB	AB	NA	0PSI.R2	0	4	16	0	0	0	0	20	0	Diploid
2023-PLATE-49_2022-2345_221-Pressure_0PSI_R2_096	Fam2	0 PSI	AB	AB	AB	A	AB	A	AB	A	AB	AB	AB	AB	AB	A	A	AB	AB	AB	AB	AB	NA	0PSI.R2	0	5	15	0	0	0	0	20	0	Diploid
2023-PLATE-49_2022-2345_222-Pressure_0PSI_R2_097	Fam2	0 PSI	AB	AB	AB	A	AB	AB	AB	AB	AB	AB	AB	A	AB	A	A	AB	AB	AB	AB	AB	NA	0PSI.R2	0	4	16	0	0	0	0	20	0	Diploid
2023-PLATE-49_2022-2345_223-Pressure_0PSI_R2_098	Fam1	0 PSI	AB	AB	A	AB	AB	A	AB	AB	A	AB	AB	A	AB	A	AB	AB	AB	AB	AB	A	NA	0PSI.R2	0	6	14	0	0	0	0	20	0	Diploid
2023-PLATE-49_2022-2345_224-Pressure_0PSI_R2_099	Fam1	0 PSI	AB	AB	A	AB	AB	AB	AB	AB	AB	A	AB	A	AB	A	AB	AB	AB	A	A	AB	NA	0PSI.R2	0	6	14	0	0	0	0	20	0	Diploid
2023-PLATE-49_2022-2345_225-Pressure_0PSI_R2_100	Fam3	0 PSI	AB	AB	AB	AB	AB	AB	AB	A	AB	AB	AB	A	AB	A	AB	AB	AB	AB	AB	A	NA	0PSI.R2	0	4	16	0	0	0	0	20	0	Diploid
2023-PLATE-49_2022-2345_226-Pressure_0PSI_R2_101	Fam1	0 PSI	AB	AB	AB	AB	AB	AB	AB	AB	AB	AB	AB	A	AB	AB	AB	AB	AB	AB	A	AB	NA	0PSI.R2	0	2	18	0	0	0	0	20	0	Diploid
2023-PLATE-49_2022-2345_227-Pressure_0PSI_R2_102	Fam2	0 PSI	AB	AB	AB	NA	AB	A	AB	AB	AB	AB	A	AB	A	AB	A	AB	AB	A	AB	AB	NA	0PSI.R2	1	5	14	0	0	0	0	20	0	Diploid
2023-PLATE-49_2022-2345_228-Pressure_0PSI_R2_103	Fam1	0 PSI	AB	AB	A	AB	A	A	AB	AB	AB	A	AB	AB	NA	AB	AB	AB	AB	A	AB	A	NA	0PSI.R2	1	6	13	0	0	0	0	20	0	Diploid
2023-PLATE-49_2022-2345_229-Pressure_0PSI_R2_104	Fam1	0 PSI	AB	AB	AB	AB	A	AB	AB	AB	A	AB	AB	A	AB	A	AB	AB	AB	AB	AB	A	NA	0PSI.R2	0	5	15	0	0	0	0	20	0	Diploid
2023-PLATE-49_2022-2345_230-Pressure_0PSI_R2_105	Fam2	0 PSI	AB	AB	AB	NA	AB	AB	AB	AB	AB	AB	AB	AB	AB	A	AB	AB	AB	A	A	A	NA	0PSI.R2	1	4	15	0	0	0	0	20	0	Diploid
2023-PLATE-49_2022-2345_231-Pressure_0PSI_R2_106	Fam2	0 PSI	AB	AB	A	A	AB	A	AB	AB	A	AB	AB	AB	A	A	A	AB	AB	AB	AB	AB	NA	0PSI.R2	0	7	13	0	0	0	0	20	0	Diploid
2023-PLATE-49_2022-2345_232-Pressure_0PSI_R2_107	Fam3	0 PSI	AB	AB	AB	AB	AB	A	AB	A	AB	A	AB	A	AB	AB	AB	AB	AB	A	A	A	NA	0PSI.R2	0	7	13	0	0	0	0	20	0	Diploid
2023-PLATE-49_2022-2345_233-Pressure_0PSI_R2_108	Fam1	0 PSI	AB	AB	A	AB	AB	AB	AB	A	AB	AB	AB	AB	A	AB	AB	AB	AB	AB	AB	A	NA	0PSI.R2	0	4	16	0	0	0	0	20	0	Diploid
2023-PLATE-49_2022-2345_234-Pressure_0PSI_R2_109	Fam1	0 PSI	AB	AB	A	AB	AB	AB	AB	AB	A	AB	AB	A	AB	A	AB	AB	AB	A	AB	A	NA	0PSI.R2	0	6	14	0	0	0	0	20	0	Diploid
2023-PLATE-49_2022-2345_235-Pressure_0PSI_R2_110	Fam3	0 PSI	AB	AB	AB	AB	AB	AB	AB	AB	AB	A	AB	A	AB	A	AB	AB	AB	AB	A	A	NA	0PSI.R2	0	5	15	0	0	0	0	20	0	Diploid
2023-PLATE-49_2022-2345_236-Pressure_0PSI_R2_111	Fam3	0 PSI	AB	AB	AB	AB	AB	A	AB	A	AB	AB	AB	AB	A	A	AB	A	AB	AB	AB	AB	NA	0PSI.R2	0	5	15	0	0	0	0	20	0	Diploid
2023-PLATE-49_2022-2345_237-Pressure_0PSI_R2_112	Fam1	0 PSI	AB	AB	AB	AB	AB	AB	AB	AB	AB	A	AB	AB	AB	A	AB	AB	AB	AB	A	A	NA	0PSI.R2	0	4	16	0	0	0	0	20	0	Diploid
2023-PLATE-49_2022-2345_238-Pressure_0PSI_R2_113	Fam2	0 PSI	AB	AB	AB	NA	AB	A	AB	AB	AB	A	A	A	A	A	A	AB	AB	A	A	A	NA	0PSI.R2	1	10	9	0	0	0	0	20	0	Diploid
2023-PLATE-49_2022-2345_239-Pressure_0PSI_R2_114	Fam2	0 PSI	AB	AB	AB	NA	AB	AB	AB	A	AB	AB	AB	AB	AB	A	AB	AB	AB	A	AB	A	NA	0PSI.R2	1	4	15	0	0	0	0	20	0	Diploid
2023-PLATE-49_2022-2345_240-Pressure_0PSI_R2_115	Fam3	0 PSI	AB	AB	AB	AB	AB	A	AB	A	AB	AB	AB	AB	AB	A	AB	A	AB	AB	AB	AB	NA	0PSI.R2	0	4	16	0	0	0	0	20	0	Diploid
2023-PLATE-49_2022-2345_241-Pressure_0PSI_R2_116	Fam2	0 PSI	AB	AB	AB	A	AB	A	AB	A	AB	A	AB	AB	AB	A	AB	AB	AB	AB	AB	AB	NA	0PSI.R2	0	5	15	0	0	0	0	20	0	Diploid
2023-PLATE-49_2022-2345_242-Pressure_0PSI_R2_117	Fam3	0 PSI	AB	AB	AB	AB	AB	AB	AB	AB	AB	A	AB	AB	AB	A	AB	A	AB	AB	A	AB	NA	0PSI.R2	0	4	16	0	0	0	0	20	0	Diploid
2023-PLATE-49_2022-2345_243-Pressure_0PSI_R2_118	Fam2	0 PSI	AB	AB	A	A	AB	A	AB	A	AB	AB	AB	AB	A	AB	AB	AB	AB	AB	AB	AB	NA	0PSI.R2	0	5	15	0	0	0	0	20	0	Diploid
2023-PLATE-49_2022-2345_244-Pressure_0PSI_R2_119	Fam1	0 PSI	AB	AB	AB	AB	AB	AB	AB	AB	A	AB	AB	AB	AB	A	AB	AB	AB	AB	AB	A	NA	0PSI.R2	0	3	17	0	0	0	0	20	0	Diploid
2023-PLATE-49_2022-2345_245-Pressure_0PSI_R2_120	Fam2	0 PSI	NA	NA	NA	NA	AB	AB	AB	A	AB	A	A	AB	AB	A	A	AB	AB	AB	A	AB	NA	0PSI.R2	4	6	10	0	0	0	0	20	0	Diploid
2023-PLATE-49_2022-2345_246-Pressure_0PSI_R2_121	Fam3	0 PSI	AB	AB	AB	AB	AB	AB	AB	A	AB	A	AB	AB	AB	AB	AB	A	AB	AB	A	AB	NA	0PSI.R2	0	4	16	0	0	0	0	20	0	Diploid
2023-PLATE-49_2022-2345_247-Pressure_0PSI_R2_122	Fam2	0 PSI	AB	AB	AB	A	AB	AB	AB	AB	A	AB	AB	AB	AB	A	AB	AB	AB	A	AB	AB	NA	0PSI.R2	0	4	16	0	0	0	0	20	0	Diploid
2023-PLATE-49_2022-2345_248-Pressure_0PSI_R2_123	Fam3	0 PSI	AB	AB	AB	AB	AB	AB	AB	A	AB	AB	AB	A	AB	AB	AB	A	AB	AB	AB	A	NA	0PSI.R2	0	4	16	0	0	0	0	20	0	Diploid
2023-PLATE-49_2022-2345_249-Pressure_0PSI_R2_124	Fam2	0 PSI	AB	AB	AB	A	AB	AB	AB	A	AB	AB	AB	AB	AB	A	A	AB	AB	A	AB	AB	NA	0PSI.R2	0	5	15	0	0	0	0	20	0	Diploid

## Sheet: Experiment 2_eggs
Sample_Name	family	treatment	SSsp2210_genotype	SsaD157_genotype	Sp1605_genotype	Sp2216_genotype	Ssa14_genotype	Ssa197_genotype	SsaF43_genotype	SsOsl85_genotype	EST107_genotype	EST19_genotype	EST28_genotype	EST68_genotype	Sleel53_genotype	Sleen82_genotype	SsOSL25_genotype	SsSP2215_genotype	Ssa407_genotype	Ssa412_genotype	Ssleer15.1_genotype	Aberration	count_NA	count_A	count_AB	count_AAB	count_ABB	count_ABC	count_trisomic	sum	prop.trisomic	ploidy
2022-PLATE-69_2022-137_10-2N_Fam1_10	Fam01	0 PSI	AB	A	NA	NA	AB	AB	AB	AB	AB	AB	AB	AB	AB	AB	AB	AB	AB	AB	AB	NA	2	1	16	0	0	0	0	19	0	Diploid
2022-PLATE-69_2022-137_11-2N_Fam1_11	Fam01	0 PSI	AB	AB	NA	NA	AB	AB	A	AB	A	A	A	AB	AB	AB	A	AB	A	A	A	NA	2	8	9	0	0	0	0	19	0	Diploid
2022-PLATE-69_2022-137_12-2N_Fam1_12	Fam01	0 PSI	AB	A	check	NA	AB	AB	AB	AB	A	AB	A	AB	AB	AB	AB	AB	AB	AB	A	NA	1	4	13	0	0	0	0	19	0	Diploid
2022-PLATE-69_2022-137_1-2N_Fam1_01	Fam01	0 PSI	NA	NA	NA	NA	A	AB	AB	AB	A	AB	AB	AB	A	AB	A	AB	AB	A	A	NA	4	6	9	0	0	0	0	19	0	Diploid
2022-PLATE-69_2022-137_13-2N_Fam1_13	Fam01	0 PSI	AB	AB	NA	NA	A	AB	A	A	AB	AB	AB	AB	AB	AB	A	AB	AB	A	A	NA	2	6	11	0	0	0	0	19	0	Diploid
2022-PLATE-69_2022-137_14-2N_Fam1_14	Fam01	0 PSI	AB	AB	NA	NA	A	AB	AB	A	AB	AB	AB	AB	A	AB	AB	AB	AB	AB	A	NA	2	4	13	0	0	0	0	19	0	Diploid
2022-PLATE-69_2022-137_15-2N_Fam1_15	Fam01	0 PSI	AB	AB	NA	NA	AB	AB	A	AB	AB	A	A	AB	AB	AB	AB	AB	AB	A	AB	NA	2	4	13	0	0	0	0	19	0	Diploid
2022-PLATE-69_2022-137_16-2N_Fam1_16	Fam01	0 PSI	AB	AB	check	NA	check	AB	A	A	AB	AB	A	AB	AB	AB	AB	AB	A	AB	AB	NA	1	4	12	0	0	0	0	19	0	Diploid
2022-PLATE-69_2022-137_17-2N_Fam1_17	Fam01	0 PSI	NA	A	NA	NA	AB	AB	AB	AB	AB	AB	A	A	A	AB	AB	AB	AB	A	A	NA	3	6	10	0	0	0	0	19	0	Diploid
2022-PLATE-69_2022-137_18-2N_Fam1_18	Fam01	0 PSI	AB	A	NA	NA	A	AB	A	AB	A	AB	AB	AB	AB	AB	AB	AB	AB	A	A	NA	2	6	11	0	0	0	0	19	0	Diploid
2022-PLATE-69_2022-137_19-2N_Fam1_19	Fam01	0 PSI	AB	A	NA	NA	AB	AB	A	AB	A	A	A	A	AB	AB	A	AB	AB	A	A	NA	2	9	8	0	0	0	0	19	0	Diploid
2022-PLATE-69_2022-137_20-2N_Fam1_20	Fam01	0 PSI	NA	AB	NA	NA	AB	AB	AB	A	AB	A	A	A	A	AB	AB	AB	AB	A	AB	NA	3	6	10	0	0	0	0	19	0	Diploid
2022-PLATE-69_2022-137_21-2N_Fam2_01	Fam02	0 PSI	AB	AB	A	NA	A	AB	AB	A	AB	AB	AB	A	AB	AB	AB	AB	AB	A	A	NA	1	6	12	0	0	0	0	19	0	Diploid
2022-PLATE-69_2022-137_22-2N_Fam2_02	Fam02	0 PSI	NA	A	A	NA	AB	AB	A	AB	A	A	AB	AB	AB	A	AB	AB	A	A	AB	NA	2	8	9	0	0	0	0	19	0	Diploid
2022-PLATE-69_2022-137_2-2N_Fam1_02	Fam01	0 PSI	AB	AB	NA	NA	A	AB	AB	A	AB	A	A	AB	A	AB	AB	AB	A	A	AB	NA	2	7	10	0	0	0	0	19	0	Diploid
2022-PLATE-69_2022-137_23-2N_Fam2_03	Fam02	0 PSI	AB	AB	A	NA	AB	AB	AB	AB	AB	AB	A	AB	AB	AB	AB	AB	A	AB	AB	NA	1	3	15	0	0	0	0	19	0	Diploid
2022-PLATE-69_2022-137_24-2N_Fam2_04	Fam02	0 PSI	AB	AB	A	NA	A	AB	AB	A	A	AB	AB	NA	AB	AB	AB	AB	A	A	A	NA	2	7	10	0	0	0	0	19	0	Diploid
2022-PLATE-69_2022-137_25-2N_Fam2_05	Fam02	0 PSI	NA	AAB	A	NA	A	AB	A	A	AB	AB	AB	A	A	A	AB	AB	AB	A	AB	2 paternal	2	8	8	1	0	0	1	19	0.111111	Aneuploid
2022-PLATE-69_2022-137_26-2N_Fam2_06	Fam02	0 PSI	AB	A	A	NA	A	AB	AB	AB	A	A	AB	AB	A	A	AB	AB	AB	A	AB	NA	1	8	10	0	0	0	0	19	0	Diploid
2022-PLATE-69_2022-137_27-2N_Fam2_07	Fam02	0 PSI	NA	AB	A	NA	AB	AB	AB	AB	A	AB	AB	AB	A	A	AB	AB	AB	AB	AB	NA	2	4	13	0	0	0	0	19	0	Diploid
2022-PLATE-69_2022-137_28-2N_Fam2_08	Fam02	0 PSI	NA	A	A	NA	AB	AB	A	AB	AB	AB	AB	AB	A	AB	AB	AB	AB	AB	AB	NA	2	4	13	0	0	0	0	19	0	Diploid
2022-PLATE-69_2022-137_29-2N_Fam2_09	Fam02	0 PSI	AB	AB	A	NA	AB	AB	AB	AB	AB	AB	AB	AB	AB	AB	AB	AB	AB	A	AB	NA	1	2	16	0	0	0	0	19	0	Diploid
2022-PLATE-69_2022-137_30-2N_Fam2_10	Fam02	0 PSI	AB	AB	A	NA	A	AB	A	AB	AB	AB	A	A	AB	AB	AB	AB	AB	A	AB	NA	1	6	12	0	0	0	0	19	0	Diploid
2022-PLATE-69_2022-137_31-2N_Fam2_11	Fam02	0 PSI	AB	AB	A	NA	A	AB	A	AB	AB	AB	A	AB	A	AB	AB	AB	AB	AB	AB	NA	1	5	13	0	0	0	0	19	0	Diploid
2022-PLATE-69_2022-137_32-2N_Fam2_12	Fam02	0 PSI	NA	NA	A	NA	A	AB	A	NA	AB	AB	AB	A	AB	AB	AAB	AB	AB	AB	AB	NA	4	4	10	1	0	0	1	19	0.0909091	Aneuploid
2022-PLATE-69_2022-137_3-2N_Fam1_03	Fam01	0 PSI	AB	AB	NA	NA	AB	AB	AB	AB	AB	AB	AB	AB	AB	AB	A	NA	AB	AB	AB	NA	3	1	15	0	0	0	0	19	0	Diploid
2022-PLATE-69_2022-137_33-2N_Fam2_13	Fam02	0 PSI	AB	AB	A	NA	AB	AB	A	AB	AB	AB	A	AB	A	AB	AB	AB	AB	AB	AB	NA	1	4	14	0	0	0	0	19	0	Diploid
2022-PLATE-69_2022-137_34-2N_Fam2_14	Fam02	0 PSI	AB	AB	A	NA	AB	AB	A	AB	AB	AB	AB	AB	AB	AB	AB	AB	A	AB	AB	NA	1	3	15	0	0	0	0	19	0	Diploid
2022-PLATE-69_2022-137_35-2N_Fam2_15	Fam02	0 PSI	AB	A	A	NA	check	AB	AB	AB	AB	AB	AB	AB	AB	AB	AB	AB	AB	AB	AB	NA	1	2	15	0	0	0	0	19	0	Diploid
2022-PLATE-69_2022-137_36-2N_Fam2_16	Fam02	0 PSI	NA	A	A	NA	A	AB	AB	AB	AB	AB	A	AB	AB	A	AB	AB	NA	A	AB	bp shift	3	6	10	0	0	0	0	19	0	Diploid
2022-PLATE-69_2022-137_37-2N_Fam2_17	Fam02	0 PSI	AAB	A	A	NA	A	AB	A	A	AB	AB	AB	AB	AB	A	AB	AB	A	A	AB	2 paternal	1	8	9	1	0	0	1	19	0.1	Aneuploid
2022-PLATE-69_2022-137_38-2N_Fam2_18	Fam02	0 PSI	ABB	A	A	NA	AB	AB	A	AB	A	AB	A	AB	AB	AB	check	AB	AB	A	AB	2 paternal	1	6	10	0	1	0	1	19	0.0909091	Aneuploid
2022-PLATE-69_2022-137_39-2N_Fam2_19	Fam02	0 PSI	NA	NA	NA	NA	NA	AB	AB	AB	AB	AB	AB	AB	AB	A	AB	AB	AB	A	AB	bp shift	5	2	12	0	0	0	0	19	0	Diploid
2022-PLATE-69_2022-137_40-2N_Fam2_20	Fam02	0 PSI	AB	AAB	A	NA	AB	AB	A	A	AB	AB	AB	AB	AB	AB	AB	AB	AB	AB	AB	2 paternal	1	3	14	1	0	0	1	19	0.0666667	Aneuploid
2022-PLATE-69_2022-137_41-2N_Fam3_01	Fam03	0 PSI	AAB	NA	NA	NA	AB	AB	AB	AB	AB	AB	A	AB	A	AB	A	AB	AB	AB	A	2 paternal	3	4	11	1	0	0	1	19	0.0833333	Aneuploid
2022-PLATE-69_2022-137_42-2N_Fam3_02	Fam03	0 PSI	NA	NA	NA	NA	AB	AB	A	AB	AB	AB	AB	AB	AB	AB	A	AB	AB	AB	AB	NA	4	2	13	0	0	0	0	19	0	Diploid
2022-PLATE-69_2022-137_4-2N_Fam1_04	Fam01	0 PSI	AB	AB	check	NA	A	AB	A	AB	AB	A	A	AB	A	AB	A	AB	AB	AB	AB	NA	1	6	11	0	0	0	0	19	0	Diploid
2022-PLATE-69_2022-137_43-2N_Fam3_03	Fam03	0 PSI	NA	NA	NA	NA	AB	AB	AB	AB	AB	AB	AB	AB	AB	AB	AB	AB	A	AB	AB	NA	4	1	14	0	0	0	0	19	0	Diploid
2022-PLATE-69_2022-137_44-2N_Fam3_04	Fam03	0 PSI	NA	NA	NA	NA	A	AB	A	AB	A	AB	AB	A	A	AB	AB	AB	A	A	AB	NA	4	7	8	0	0	0	0	19	0	Diploid
2022-PLATE-69_2022-137_45-2N_Fam3_05	Fam03	0 PSI	NA	NA	AB	NA	check	AB	AB	AB	A	AB	AB	AB	A	AB	A	AB	AB	AB	AB	NA	3	3	12	0	0	0	0	19	0	Diploid
2022-PLATE-69_2022-137_46-2N_Fam3_06	Fam03	0 PSI	AB	NA	NA	NA	AB	AB	A	AB	AB	AB	AB	AB	A	AB	A	AB	AB	AB	A	NA	3	4	12	0	0	0	0	19	0	Diploid
2022-PLATE-69_2022-137_47-2N_Fam3_07	Fam03	0 PSI	check	NA	NA	NA	AB	AB	AB	AB	AB	AB	A	AB	A	AB	A	AB	AB	AB	AB	NA	3	3	12	0	0	0	0	19	0	Diploid
2022-PLATE-69_2022-137_48-2N_Fam3_08	Fam03	0 PSI	AB	AB	NA	NA	AB	NA	AAB	AB	AB	AB	AB	AB	AB	AB	AB	AB	A	AB	AB	2 paternal	3	1	14	1	0	0	1	19	0.0666667	Aneuploid
2022-PLATE-69_2022-137_49-2N_Fam3_09	Fam03	0 PSI	NA	ABB	NA	NA	A	AB	A	AB	AB	AB	AB	A	AB	AB	A	AB	AB	AB	A	2 paternal	3	5	10	0	1	0	1	19	0.0909091	Aneuploid
2022-PLATE-69_2022-137_50-2N_Fam3_10	Fam03	0 PSI	AAB	ABB	NA	NA	A	AB	AB	AB	A	AB	AB	A	A	AB	A	AB	AB	AB	AB	2 paternal	2	5	10	1	1	0	2	19	0.166667	Aneuploid
2022-PLATE-69_2022-137_51-2N_Fam3_11	Fam03	0 PSI	NA	A	NA	NA	A	AB	A	AB	AB	AB	AB	AB	A	AB	AB	AB	A	A	AB	bp shift	3	6	10	0	0	0	0	19	0	Diploid
2022-PLATE-69_2022-137_52-2N_Fam3_12	Fam03	0 PSI	AB	AB	NA	NA	AB	AB	AB	AB	AB	AB	AB	AB	AB	AB	AB	AB	AB	AB	A	NA	2	1	16	0	0	0	0	19	0	Diploid
2022-PLATE-69_2022-137_5-2N_Fam1_05	Fam01	0 PSI	AB	AB	check	NA	AB	AB	A	AB	AB	A	AB	AB	A	AB	AB	AB	AB	A	A	NA	1	5	12	0	0	0	0	19	0	Diploid
2022-PLATE-69_2022-137_53-2N_Fam3_13	Fam03	0 PSI	AB	NA	NA	NA	A	AB	AB	AB	A	AB	AB	A	AB	AB	AB	AB	A	A	A	NA	3	6	10	0	0	0	0	19	0	Diploid
2022-PLATE-69_2022-137_54-2N_Fam3_14	Fam03	0 PSI	AB	NA	NA	NA	AB	AB	AB	AB	AB	AB	A	AB	AB	AB	A	AB	AB	A	AB	NA	3	3	13	0	0	0	0	19	0	Diploid
2022-PLATE-69_2022-137_55-2N_Fam3_15	Fam03	0 PSI	NA	NA	NA	NA	A	AB	AB	AB	AB	AB	AB	A	A	AB	AB	AB	AB	A	AB	NA	4	4	11	0	0	0	0	19	0	Diploid
2022-PLATE-69_2022-137_56-2N_Fam3_16	Fam03	0 PSI	NA	NA	NA	NA	NA	AB	AB	AB	A	AB	AB	AB	A	AB	AB	AB	AB	AB	A	NA	5	3	11	0	0	0	0	19	0	Diploid
2022-PLATE-69_2022-137_57-2N_Fam3_17	Fam03	0 PSI	AB	AB	NA	NA	AB	AB	A	AB	A	AB	AB	AB	AB	AB	AB	AB	A	AB	A	NA	2	4	13	0	0	0	0	19	0	Diploid
2022-PLATE-69_2022-137_58-2N_Fam3_18	Fam03	0 PSI	NA	NA	NA	NA	A	AB	A	AB	A	AB	AB	A	A	AB	AB	AB	A	A	A	NA	4	8	7	0	0	0	0	19	0	Diploid
2022-PLATE-69_2022-137_59-2N_Fam3_19	Fam03	0 PSI	check	AB	NA	NA	AB	AB	A	AB	AB	AB	AB	AB	A	AB	A	AB	AB	A	AB	NA	2	4	12	0	0	0	0	19	0	Diploid
2022-PLATE-69_2022-137_60-2N_Fam3_20	Fam03	0 PSI	AB	NA	NA	NA	AB	AB	AB	AB	AB	AB	AB	AB	A	AB	A	AB	AB	A	A	NA	3	4	12	0	0	0	0	19	0	Diploid
2022-PLATE-69_2022-137_61-2N_Fam4_01	Fam04	0 PSI	A	NA	A	NA	A	NA	NA	NA	NA	AB	AB	AB	AB	AB	AB	AB	AB	A	AB	NA	6	4	9	0	0	0	0	19	0	Diploid
2022-PLATE-69_2022-137_62-2N_Fam4_02	Fam04	0 PSI	A	A	NA	NA	AB	AB	AB	A	AB	AB	check	A	AB	AB	AB	AB	AB	A	A	NA	2	6	10	0	0	0	0	19	0	Diploid
2022-PLATE-69_2022-137_6-2N_Fam1_06	Fam01	0 PSI	AB	AB	NA	NA	A	AB	AB	A	AB	AB	AB	AB	A	AB	check	AB	AB	AB	AB	NA	2	3	13	0	0	0	0	19	0	Diploid
2022-PLATE-69_2022-137_63-2N_Fam4_03	Fam04	0 PSI	NA	NA	NA	NA	A	AB	AB	A	AB	AB	AB	AB	AB	AB	AB	A	AB	AB	A	NA	4	4	11	0	0	0	0	19	0	Diploid
2022-PLATE-69_2022-137_64-2N_Fam4_04	Fam04	0 PSI	NA	NA	NA	NA	AB	AB	AB	A	A	AB	AB	AB	A	AB	check	NA	AB	A	AB	NA	5	4	9	0	0	0	0	19	0	Diploid
2022-PLATE-69_2022-137_65-2N_Fam4_05	Fam04	0 PSI	NA	AB	A	NA	A	AB	AB	AB	AB	AB	AB	AB	AB	AB	AB	AB	A	AB	AB	NA	2	3	14	0	0	0	0	19	0	Diploid
2022-PLATE-69_2022-137_66-2N_Fam4_06	Fam04	0 PSI	AB	AB	NA	NA	A	AB	AB	A	AB	AB	AB	AB	A	AB	AB	AB	AB	A	AB	NA	2	4	13	0	0	0	0	19	0	Diploid
2022-PLATE-69_2022-137_67-2N_Fam4_07	Fam04	0 PSI	AB	NA	NA	NA	NA	AB	AB	AB	AB	AB	A	AB	A	AB	AB	AB	AB	AB	AB	NA	4	2	13	0	0	0	0	19	0	Diploid
2022-PLATE-69_2022-137_68-2N_Fam4_08	Fam04	0 PSI	A	NA	NA	NA	A	AB	AB	AB	AB	AB	AB	AB	AB	AB	AB	A	AB	A	AB	NA	3	4	12	0	0	0	0	19	0	Diploid
2022-PLATE-69_2022-137_69-2N_Fam4_09	Fam04	0 PSI	check	NA	NA	NA	AB	AB	AB	AB	AB	AB	AB	AB	AB	AB	AB	AB	AB	AB	A	NA	3	1	14	0	0	0	0	19	0	Diploid
2022-PLATE-69_2022-137_70-2N_Fam4_10	Fam04	0 PSI	NA	NA	NA	NA	AB	AB	AB	AB	AB	AB	AB	A	AB	AB	AB	AB	AB	AB	AB	NA	4	1	14	0	0	0	0	19	0	Diploid
2022-PLATE-69_2022-137_71-2N_Fam4_11	Fam04	0 PSI	NA	NA	NA	NA	A	AB	AB	AB	A	AB	AB	AB	A	AB	AB	AB	A	A	A	NA	4	6	9	0	0	0	0	19	0	Diploid
2022-PLATE-69_2022-137_72-2N_Fam4_12	Fam04	0 PSI	AB	A	NA	NA	AB	AB	AB	A	AB	AB	AB	AB	AB	AB	AB	AB	AB	A	A	NA	2	4	13	0	0	0	0	19	0	Diploid
2022-PLATE-69_2022-137_7-2N_Fam1_07	Fam01	0 PSI	AB	AB	check	NA	AB	AB	AB	AB	AB	A	A	AB	AB	AB	AB	AB	A	AB	A	NA	1	4	13	0	0	0	0	19	0	Diploid
2022-PLATE-69_2022-137_73-2N_Fam4_13	Fam04	0 PSI	AB	A	NA	NA	A	AB	AB	AB	A	AB	A	AB	AB	AB	AB	A	AB	A	A	NA	2	7	10	0	0	0	0	19	0	Diploid
2022-PLATE-69_2022-137_74-2N_Fam4_14	Fam04	0 PSI	AB	AB	A	NA	AB	AB	AB	A	AB	AB	AB	A	A	AB	AB	AB	AB	A	A	NA	1	6	12	0	0	0	0	19	0	Diploid
2022-PLATE-69_2022-137_75-2N_Fam4_15	Fam04	0 PSI	AAB	AB	NA	NA	AB	AB	AB	A	A	AB	AB	AB	A	AB	AB	A	A	A	A	NA	2	7	9	1	0	0	1	19	0.1	Aneuploid
2022-PLATE-69_2022-137_76-2N_Fam4_16	Fam04	0 PSI	check	NA	NA	NA	AB	AB	AB	A	AB	AB	AB	A	A	AB	check	AB	A	A	A	NA	3	6	8	0	0	0	0	19	0	Diploid
2022-PLATE-69_2022-137_77-2N_Fam4_17	Fam04	0 PSI	check	A	NA	NA	AB	AB	AB	A	A	AB	AB	A	A	AB	AB	AB	AB	A	A	NA	2	7	9	0	0	0	0	19	0	Diploid
2022-PLATE-69_2022-137_78-2N_Fam4_18	Fam04	0 PSI	AB	A	A	NA	AB	AB	AB	AB	AB	AB	A	A	AB	AB	AB	AB	AB	AB	AB	NA	1	4	14	0	0	0	0	19	0	Diploid
2022-PLATE-69_2022-137_79-2N_Fam4_19	Fam04	0 PSI	AB	A	NA	NA	A	AB	AB	A	AB	AB	AB	AB	A	AB	AB	AB	AB	AB	A	NA	2	5	12	0	0	0	0	19	0	Diploid
2022-PLATE-69_2022-137_80-2N_Fam4_20	Fam04	0 PSI	AB	AB	A	NA	AB	AB	AB	AB	A	AB	AB	AB	AB	AB	AB	AB	AB	AB	A	NA	1	3	15	0	0	0	0	19	0	Diploid
2022-PLATE-69_2022-137_81-2N_Fam5_01	Fam05	0 PSI	AB	AB	A	NA	A	AB	AB	AB	A	AB	AB	AB	A	AB	AB	AB	A	A	AB	NA	1	6	12	0	0	0	0	19	0	Diploid
2022-PLATE-69_2022-137_82-2N_Fam5_02	Fam05	0 PSI	AB	AB	A	NA	NA	NA	AB	NA	AB	AB	AB	AB	AB	AB	AB	AB	AB	A	AB	NA	4	2	13	0	0	0	0	19	0	Diploid
2022-PLATE-69_2022-137_8-2N_Fam1_08	Fam01	0 PSI	AB	AB	NA	NA	check	AB	A	AB	A	AB	AB	AB	A	AB	AB	AB	AB	A	A	NA	2	5	11	0	0	0	0	19	0	Diploid
2022-PLATE-69_2022-137_83-2N_Fam5_03	Fam05	0 PSI	check	NA	A	NA	A	AB	AB	AB	AB	AB	AB	AB	A	AB	AB	AB	A	A	AB	NA	2	5	11	0	0	0	0	19	0	Diploid
2022-PLATE-69_2022-137_84-2N_Fam5_04	Fam05	0 PSI	A	NA	A	NA	A	AB	AB	AB	A	AB	AB	AB	AB	AB	AB	AB	AB	A	AB	NA	2	5	12	0	0	0	0	19	0	Diploid
2022-PLATE-69_2022-137_85-2N_Fam5_05	Fam05	0 PSI	NA	NA	A	NA	A	AB	A	AB	AB	AB	AB	AB	A	AB	AB	AB	AB	A	AB	NA	3	5	11	0	0	0	0	19	0	Diploid
2022-PLATE-69_2022-137_86-2N_Fam5_06	Fam05	0 PSI	NA	NA	A	NA	A	AB	A	AB	AB	A	AB	AB	A	AB	AB	AB	AB	A	AB	NA	3	6	10	0	0	0	0	19	0	Diploid
2022-PLATE-69_2022-137_87-2N_Fam5_07	Fam05	0 PSI	A	AB	NA	NA	NA	NA	NA	NA	AB	AB	AB	AB	A	AB	AB	AB	AB	A	A	NA	6	4	9	0	0	0	0	19	0	Diploid
2022-PLATE-69_2022-137_88-2N_Fam5_08	Fam05	0 PSI	AB	AB	NA	NA	NA	NA	NA	NA	AB	A	AB	AB	AB	AB	AB	AB	AB	A	AB	NA	6	2	11	0	0	0	0	19	0	Diploid
2022-PLATE-69_2022-137_89-2N_Fam5_09	Fam05	0 PSI	AB	AB	NA	NA	NA	NA	NA	NA	AB	AB	AB	AB	AB	AB	AB	AB	AB	A	AB	NA	6	1	12	0	0	0	0	19	0	Diploid
2022-PLATE-69_2022-137_90-2N_Fam5_10	Fam05	0 PSI	NA	AB	A	NA	A	AB	A	AB	A	AB	AB	AB	AB	AB	AB	AB	AB	A	A	NA	2	6	11	0	0	0	0	19	0	Diploid
2022-PLATE-69_2022-137_91-2N_Fam5_11	Fam05	0 PSI	A	NA	NA	NA	NA	AB	AB	AB	AB	A	AB	AB	A	AB	AB	AB	A	A	AB	NA	4	5	10	0	0	0	0	19	0	Diploid
2022-PLATE-69_2022-137_92-2N_Fam5_12	Fam05	0 PSI	NA	NA	A	NA	A	AB	AB	AB	A	AB	A	AB	AB	AB	AB	AB	A	A	AB	NA	3	6	10	0	0	0	0	19	0	Diploid
2022-PLATE-69_2022-137_9-2N_Fam1_09	Fam01	0 PSI	AB	A	NA	NA	check	AB	AB	AB	AB	AB	AB	NA	A	AB	AB	AB	AB	A	AB	NA	3	3	12	0	0	0	0	19	0	Diploid
2022-PLATE-69_2022-137_93-2N_Fam5_13	Fam05	0 PSI	AB	AB	A	NA	AB	AB	AB	AB	AB	AB	AB	AB	AB	AB	AB	AB	A	A	AB	NA	1	3	15	0	0	0	0	19	0	Diploid
2022-PLATE-69_2022-137_94-2N_Fam5_14	Fam05	0 PSI	NA	NA	A	NA	A	AB	A	AB	AB	A	AB	AB	A	AB	check	AB	AB	A	AB	NA	3	6	9	0	0	0	0	19	0	Diploid
2022-PLATE-74_2022-137_100-2N_Fam5_20	Fam05	0 PSI	AB	AB	A	NA	AB	NA	A	NA	AB	A	AB	AB	AB	AB	AB	AB	AB	A	A	NA	3	5	11	0	0	0	0	19	0	Diploid
2022-PLATE-74_2022-137_101-2N_Fam6_01	Fam06	0 PSI	AB	A	A	NA	A	AB	AB	AB	A	AB	A	AB	AB	AB	AB	AB	AB	A	AB	NA	1	6	12	0	0	0	0	19	0	Diploid
2022-PLATE-74_2022-137_102-2N_Fam6_02	Fam06	0 PSI	A	AB	AB	NA	AB	AB	AB	AB	AB	AB	AB	AB	A	AB	AB	AB	AB	A	A	NA	1	4	14	0	0	0	0	19	0	Diploid
2022-PLATE-74_2022-137_103-2N_Fam6_03	Fam06	0 PSI	A	AB	A	NA	A	AB	AB	AB	A	AB	AB	A	AB	AB	AB	AB	AB	A	AB	NA	1	6	12	0	0	0	0	19	0	Diploid
2022-PLATE-74_2022-137_104-2N_Fam6_04	Fam06	0 PSI	AB	AB	A	NA	A	AB	AB	AB	AB	A	A	AB	AB	AB	AB	AB	AB	A	AB	NA	1	5	13	0	0	0	0	19	0	Diploid
2022-PLATE-74_2022-137_105-2N_Fam6_05	Fam06	0 PSI	AB	AB	A	NA	AB	AB	AB	AB	A	AB	AB	AB	A	AB	AB	AB	AB	A	A	NA	1	5	13	0	0	0	0	19	0	Diploid
2022-PLATE-74_2022-137_106-2N_Fam6_06	Fam06	0 PSI	AB	AB	A	NA	AB	AB	AB	AB	AB	AB	A	A	A	AB	AB	AB	AB	A	AB	NA	1	5	13	0	0	0	0	19	0	Diploid
2022-PLATE-74_2022-137_107-2N_Fam6_07	Fam06	0 PSI	AB	AB	A	NA	AB	AB	AB	A	AB	AB	AB	AB	A	AB	AB	AB	AB	A	A	NA	1	5	13	0	0	0	0	19	0	Diploid
2022-PLATE-74_2022-137_108-2N_Fam6_08	Fam06	0 PSI	AB	AB	AB	NA	A	AB	AB	AB	AB	AB	A	AB	A	AB	AB	NA	AB	A	A	NA	2	5	12	0	0	0	0	19	0	Diploid
2022-PLATE-74_2022-137_109-2N_Fam6_09	Fam06	0 PSI	A	A	AB	NA	AB	A	AB	A	AB	AB	A	NA	AB	AB	AB	NA	AB	A	A	bp shift	3	7	9	0	0	0	0	19	0	Diploid
2022-PLATE-74_2022-137_110-2N_Fam6_10	Fam06	0 PSI	A	A	A	NA	AB	ABB	AB	AB	AB	A	AB	A	A	AB	AB	AB	AB	A	A	2 paternal	1	8	9	0	1	0	1	19	0.1	Aneuploid
2022-PLATE-74_2022-137_111-2N_Fam6_11	Fam06	0 PSI	A	AB	AB	NA	A	AB	A	AB	AB	AB	AB	A	A	ABB	AB	AB	AB	A	AB	NA	1	6	11	0	1	0	1	19	0.0833333	Aneuploid
2022-PLATE-74_2022-137_112-2N_Fam6_12	Fam06	0 PSI	AB	A	AB	NA	AB	AB	A	AB	A	AB	A	A	AB	AB	AB	AB	AB	A	AB	NA	1	6	12	0	0	0	0	19	0	Diploid
2022-PLATE-74_2022-137_113-2N_Fam6_13	Fam06	0 PSI	A	AB	A	NA	A	AB	AB	AB	AB	AB	A	AB	AB	AB	AB	AB	AB	A	AB	NA	1	5	13	0	0	0	0	19	0	Diploid
2022-PLATE-74_2022-137_114-2N_Fam6_14	Fam06	0 PSI	NA	AB	A	NA	A	NA	A	AB	AB	AB	AB	A	A	AB	AB	AB	AB	A	AB	NA	3	6	10	0	0	0	0	19	0	Diploid
2022-PLATE-74_2022-137_115-2N_Fam6_15	Fam06	0 PSI	AB	AB	AB	NA	A	AB	AB	AB	AB	AB	AB	A	A	AB	AB	AB	AB	A	AB	NA	1	4	14	0	0	0	0	19	0	Diploid
2022-PLATE-74_2022-137_116-2N_Fam6_16	Fam06	0 PSI	AB	AB	AB	NA	AB	AB	A	AB	AB	AB	A	AB	AB	AB	AB	AB	AB	A	A	NA	1	4	14	0	0	0	0	19	0	Diploid
2022-PLATE-74_2022-137_117-2N_Fam6_17	Fam06	0 PSI	AB	AB	A	NA	AB	AB	A	AB	AB	AB	AB	A	AB	AB	AB	AB	AB	A	A	NA	1	5	13	0	0	0	0	19	0	Diploid
2022-PLATE-74_2022-137_118-2N_Fam6_18	Fam06	0 PSI	AB	AB	A	NA	AB	AB	AB	AB	AB	AB	A	A	AB	AB	AB	AB	AB	A	A	NA	1	5	13	0	0	0	0	19	0	Diploid
2022-PLATE-74_2022-137_119-2N_Fam6_19	Fam06	0 PSI	AB	AB	AB	NA	AB	AB	A	A	AB	A	A	A	A	AB	AB	AB	AB	A	A	NA	1	8	10	0	0	0	0	19	0	Diploid
2022-PLATE-74_2022-137_120-2N_Fam6_20	Fam06	0 PSI	AB	AB	NA	NA	NA	AB	AB	AB	A	AB	AB	A	A	AB	AB	AB	AB	A	AB	NA	3	4	12	0	0	0	0	19	0	Diploid
2022-PLATE-74_2022-137_121-2N_Fam7_01	Fam07	0 PSI	AB	AB	NA	NA	NA	AB	AB	AB	A	A	AB	A	AB	AB	AB	AB	AB	A	AB	NA	3	4	12	0	0	0	0	19	0	Diploid
2022-PLATE-74_2022-137_122-2N_Fam7_02	Fam07	0 PSI	AB	AB	NA	NA	NA	AB	AB	AB	AB	A	AB	A	A	AB	A	AB	A	A	A	NA	3	7	9	0	0	0	0	19	0	Diploid
2022-PLATE-74_2022-137_123-2N_Fam7_03	Fam07	0 PSI	AB	AB	NA	NA	NA	AB	AB	AB	A	AB	AB	A	A	AB	AB	NA	AB	A	A	NA	4	5	10	0	0	0	0	19	0	Diploid
2022-PLATE-74_2022-137_124-2N_Fam7_04	Fam07	0 PSI	A	AB	NA	NA	NA	NA	AB	AB	AB	A	A	AB	A	AB	AB	AB	AB	A	AB	NA	4	5	10	0	0	0	0	19	0	Diploid
2022-PLATE-74_2022-137_125-2N_Fam7_05	Fam07	0 PSI	AB	AB	NA	NA	NA	AB	AB	AB	AB	AB	AB	AB	AB	AB	AB	AB	AB	A	AB	NA	3	1	15	0	0	0	0	19	0	Diploid
2022-PLATE-74_2022-137_126-2N_Fam7_06	Fam07	0 PSI	AB	AB	AB	NA	AB	AB	AB	AB	A	A	AB	AB	AB	AB	AB	AB	A	A	AB	NA	1	4	14	0	0	0	0	19	0	Diploid
2022-PLATE-74_2022-137_127-2N_Fam7_07	Fam07	0 PSI	AB	AB	AB	NA	AB	AB	AB	AB	AB	AB	AB	AB	A	AB	AB	AB	AB	A	AB	NA	1	2	16	0	0	0	0	19	0	Diploid
2022-PLATE-74_2022-137_128-2N_Fam7_08	Fam07	0 PSI	AB	AB	NA	NA	NA	AB	AB	NA	A	A	A	AB	A	AB	AB	AB	AB	A	A	NA	4	6	9	0	0	0	0	19	0	Diploid
2022-PLATE-74_2022-137_129-2N_Fam7_09	Fam07	0 PSI	AB	AB	AB	NA	A	AB	AB	AB	AB	AB	A	AB	AB	AB	AB	AB	A	A	AB	NA	1	4	14	0	0	0	0	19	0	Diploid
2022-PLATE-74_2022-137_130-2N_Fam7_10	Fam07	0 PSI	A	AB	AB	NA	AB	AB	AB	AB	A	A	AB	A	AB	AB	AB	AB	AB	A	AB	NA	1	5	13	0	0	0	0	19	0	Diploid
2022-PLATE-74_2022-137_131-2N_Fam7_11	Fam07	0 PSI	AB	AB	AB	NA	AB	NA	AB	AB	AB	A	A	AB	A	AB	AB	AB	A	A	AB	NA	2	5	12	0	0	0	0	19	0	Diploid
2022-PLATE-74_2022-137_132-2N_Fam7_12	Fam07	0 PSI	AB	AB	AB	NA	AB	AB	AB	A	AB	AB	A	AB	AB	AB	AB	AB	AB	A	AB	NA	1	3	15	0	0	0	0	19	0	Diploid
2022-PLATE-74_2022-137_133-2N_Fam7_13	Fam07	0 PSI	AB	AB	AB	NA	AB	AB	AB	AB	AB	AB	AB	AB	A	AB	AB	AB	A	A	A	NA	1	4	14	0	0	0	0	19	0	Diploid
2022-PLATE-74_2022-137_134-2N_Fam7_14	Fam07	0 PSI	AB	AB	AB	NA	AB	AB	AB	A	AB	AB	AB	AB	A	AB	A	AB	A	A	A	NA	1	6	12	0	0	0	0	19	0	Diploid
2022-PLATE-74_2022-137_135-2N_Fam7_15	Fam07	0 PSI	AB	AB	AB	NA	A	AB	AB	AB	AB	AB	AB	AB	AB	AB	AB	AB	A	A	A	NA	1	4	14	0	0	0	0	19	0	Diploid
2022-PLATE-74_2022-137_136-2N_Fam7_16	Fam07	0 PSI	AB	AB	AB	NA	AB	AB	AB	A	AB	AB	A	AB	A	AB	AB	AB	AB	A	AB	NA	1	4	14	0	0	0	0	19	0	Diploid
2022-PLATE-74_2022-137_137-2N_Fam7_17	Fam07	0 PSI	AB	AB	AB	NA	A	NA	AB	AB	AB	A	AB	AB	AB	AB	AB	AB	A	A	AB	NA	2	4	13	0	0	0	0	19	0	Diploid
2022-PLATE-74_2022-137_138-2N_Fam7_18	Fam07	0 PSI	NA	AB	NA	NA	NA	NA	NA	NA	A	A	AB	A	A	AB	AB	AB	AB	A	NA	NA	8	5	6	0	0	0	0	19	0	Diploid
2022-PLATE-74_2022-137_139-2N_Fam7_19	Fam07	0 PSI	AB	AB	AB	NA	A	NA	AB	AB	A	A	AB	AB	AB	AB	AB	AB	A	A	A	NA	2	6	11	0	0	0	0	19	0	Diploid
2022-PLATE-74_2022-137_140-2N_Fam7_20	Fam07	0 PSI	AAB	AAB	ABB	NA	check	ABB	AB	A	AAB	ABB	check	AAB	AAB	AAB	AAB	ABB	ABB	A	A	NA	1	3	1	7	5	0	12	19	0.923077	Aneuploid
2022-PLATE-74_2022-137_141-2N_Fam8_01	Fam08	0 PSI	A	AB	AB	NA	AB	AB	AB	AB	A	AB	A	A	A	A	AB	AB	AB	A	A	NA	1	8	10	0	0	0	0	19	0	Diploid
2022-PLATE-74_2022-137_142-2N_Fam8_02	Fam08	0 PSI	AB	A	AB	NA	AB	AB	AB	AB	AB	AB	A	A	A	A	AB	AB	AB	A	AB	NA	1	6	12	0	0	0	0	19	0	Diploid
2022-PLATE-74_2022-137_143-2N_Fam8_03	Fam08	0 PSI	AB	AB	AB	NA	AB	AB	AB	A	AB	AB	AB	A	A	A	AB	AB	AB	A	A	NA	1	6	12	0	0	0	0	19	0	Diploid
2022-PLATE-74_2022-137_144-2N_Fam8_04	Fam08	0 PSI	AB	A	AB	NA	A	AB	AB	A	AB	A	A	AB	AB	AB	AB	AB	A	A	AB	NA	1	7	11	0	0	0	0	19	0	Diploid
2022-PLATE-74_2022-137_145-2N_Fam8_05	Fam08	0 PSI	AB	AB	AB	NA	AB	AB	AB	AB	AB	AB	AB	A	A	AB	AB	AB	AB	A	AB	NA	1	3	15	0	0	0	0	19	0	Diploid
2022-PLATE-74_2022-137_146-2N_Fam8_06	Fam08	0 PSI	AB	A	AB	NA	A	AB	AB	AB	AB	AB	AB	AB	A	A	AB	AB	AB	A	A	bp shift	1	6	12	0	0	0	0	19	0	Diploid
2022-PLATE-74_2022-137_147-2N_Fam8_07	Fam08	0 PSI	AB	A	AB	NA	A	AB	AB	AB	A	AB	A	AB	AB	A	AB	AB	A	A	AB	NA	1	7	11	0	0	0	0	19	0	Diploid
2022-PLATE-74_2022-137_148-2N_Fam8_08	Fam08	0 PSI	AB	AB	AB	NA	A	AB	AB	AB	AB	A	AB	AB	AB	AB	AB	AB	A	A	AB	NA	1	4	14	0	0	0	0	19	0	Diploid
2022-PLATE-74_2022-137_149-2N_Fam8_09	Fam08	0 PSI	A	AB	AB	NA	AB	AB	AB	AB	A	AB	A	AB	AB	A	AB	AB	AB	A	A	NA	1	6	12	0	0	0	0	19	0	Diploid
2022-PLATE-74_2022-137_150-2N_Fam8_10	Fam08	0 PSI	A	AB	AB	NA	AB	NA	AB	A	AB	AB	AB	A	A	AB	AB	AB	AB	A	AB	NA	2	5	12	0	0	0	0	19	0	Diploid
2022-PLATE-74_2022-137_151-2N_Fam8_11	Fam08	0 PSI	AB	AB	AB	NA	AB	AB	AB	AB	AB	A	AB	AB	A	A	AB	AB	A	A	AB	NA	1	5	13	0	0	0	0	19	0	Diploid
2022-PLATE-74_2022-137_152-2N_Fam8_12	Fam08	0 PSI	AB	AB	AB	NA	A	A	AB	A	AB	A	A	AB	AB	A	AB	AB	AB	A	AB	NA	1	7	11	0	0	0	0	19	0	Diploid
2022-PLATE-74_2022-137_153-2N_Fam8_13	Fam08	0 PSI	AB	AB	AB	NA	A	AB	AB	AB	A	AB	AB	AB	AB	A	AB	AB	A	A	AB	bp shift	1	5	13	0	0	0	0	19	0	Diploid
2022-PLATE-74_2022-137_154-2N_Fam8_14	Fam08	0 PSI	AB	A	AB	NA	A	NA	A	AB	AB	AB	AB	AB	A	A	AB	AB	AB	A	AB	Missing maternal 1 locus	2	6	11	0	0	0	0	19	0	Diploid
2022-PLATE-74_2022-137_155-2N_Fam8_15	Fam08	0 PSI	AB	AB	AB	NA	A	AB	AB	AB	A	AB	A	AB	AB	AB	AB	AB	AB	A	AB	NA	1	4	14	0	0	0	0	19	0	Diploid
2022-PLATE-74_2022-137_156-2N_Fam8_16	Fam08	0 PSI	A	AB	AB	NA	AB	AB	check	AB	AB	AB	A	AB	A	A	AB	AB	A	A	AB	NA	1	6	11	0	0	0	0	19	0	Diploid
2022-PLATE-74_2022-137_157-2N_Fam8_17	Fam08	0 PSI	AB	AB	AB	NA	AB	AB	AB	AB	AB	AB	A	A	A	A	AB	AB	A	A	AB	NA	1	6	12	0	0	0	0	19	0	Diploid
2022-PLATE-74_2022-137_158-2N_Fam8_18	Fam08	0 PSI	AB	AB	AB	NA	AB	A	AB	A	AB	A	AB	AB	A	A	AB	AB	A	A	AB	bp shift	1	7	11	0	0	0	0	19	0	Diploid
2022-PLATE-74_2022-137_159-2N_Fam8_19	Fam08	0 PSI	AB	AB	AB	NA	AB	A	AB	AB	AB	AB	A	A	AB	A	AB	AB	AB	A	AB	NA	1	5	13	0	0	0	0	19	0	Diploid
2022-PLATE-74_2022-137_160-2N_Fam8_20	Fam08	0 PSI	AB	A	AB	NA	A	AB	AB	A	AB	AB	AB	AB	AB	AB	AB	AB	AB	A	A	NA	1	5	13	0	0	0	0	19	0	Diploid
2022-PLATE-74_2022-137_161-2N_Fam9_01	Fam09	0 PSI	AB	AB	A	NA	AB	AB	AB	AB	AB	AB	A	AB	AB	AB	AB	AB	A	A	A	NA	1	5	13	0	0	0	0	19	0	Diploid
2022-PLATE-74_2022-137_162-2N_Fam9_02	Fam09	0 PSI	AB	AB	AB	NA	AB	AB	AB	AB	AB	AB	AB	AB	A	AB	AB	AB	AB	A	AB	NA	1	2	16	0	0	0	0	19	0	Diploid
2022-PLATE-74_2022-137_163-2N_Fam9_03	Fam09	0 PSI	A	A	A	NA	A	AB	AB	A	AB	AB	A	AB	A	AB	AB	AB	AB	A	A	NA	1	9	9	0	0	0	0	19	0	Diploid
2022-PLATE-74_2022-137_164-2N_Fam9_04	Fam09	0 PSI	A	A	AB	NA	A	AB	A	A	AB	AB	A	AB	A	AB	AB	AB	A	A	AB	NA	1	9	9	0	0	0	0	19	0	Diploid
2022-PLATE-74_2022-137_165-2N_Fam9_05	Fam09	0 PSI	AB	AB	A	NA	AB	AB	AB	AB	AB	AB	AB	AB	A	AB	AB	AB	A	A	A	NA	1	5	13	0	0	0	0	19	0	Diploid
2022-PLATE-74_2022-137_166-2N_Fam9_06	Fam09	0 PSI	AB	A	A	NA	A	AB	AB	AB	AB	AB	AB	AB	AB	AB	AB	AB	A	A	AB	NA	1	5	13	0	0	0	0	19	0	Diploid
2022-PLATE-74_2022-137_167-2N_Fam9_07	Fam09	0 PSI	AB	AB	A	NA	AB	AB	AB	A	AB	AB	AB	AB	AB	AB	AB	AB	A	A	A	NA	1	5	13	0	0	0	0	19	0	Diploid
2022-PLATE-74_2022-137_168-2N_Fam9_08	Fam09	0 PSI	AB	AB	AB	NA	AB	AB	AB	AB	AB	AB	AB	AB	A	AB	AB	AB	A	A	AB	NA	1	3	15	0	0	0	0	19	0	Diploid
2022-PLATE-74_2022-137_169-2N_Fam9_09	Fam09	0 PSI	AB	AB	AB	NA	A	check	AB	A	AB	AB	A	AB	AB	AB	AB	AB	A	A	AB	NA	1	5	12	0	0	0	0	19	0	Diploid
2022-PLATE-74_2022-137_170-2N_Fam9_10	Fam09	0 PSI	A	A	AB	NA	A	AB	AB	AB	AB	AB	AB	AB	AB	AB	AB	AB	A	A	AB	NA	1	5	13	0	0	0	0	19	0	Diploid
2022-PLATE-74_2022-137_171-2N_Fam9_11	Fam09	0 PSI	AB	AB	A	NA	A	AB	A	AB	AB	AB	A	AB	A	AB	AB	AB	AB	A	A	NA	1	7	11	0	0	0	0	19	0	Diploid
2022-PLATE-74_2022-137_172-2N_Fam9_12	Fam09	0 PSI	AB	A	A	NA	A	AB	A	AB	AB	AB	AB	AB	AB	AB	check	AB	AB	A	A	NA	1	6	11	0	0	0	0	19	0	Diploid
2022-PLATE-74_2022-137_173-2N_Fam9_13	Fam09	0 PSI	AB	AB	AB	NA	AB	AB	AB	A	AB	AB	AB	AB	A	AB	AB	AB	A	A	AB	NA	1	4	14	0	0	0	0	19	0	Diploid
2022-PLATE-74_2022-137_174-2N_Fam9_14	Fam09	0 PSI	AB	AB	AB	NA	A	AB	AB	AB	AB	AB	A	AB	AB	AB	AB	AB	AB	A	A	NA	1	4	14	0	0	0	0	19	0	Diploid
2022-PLATE-74_2022-137_175-2N_Fam9_15	Fam09	0 PSI	AB	AB	A	NA	AB	AB	A	AB	AB	A	AB	AB	AB	AB	AB	AB	AB	A	A	NA	1	5	13	0	0	0	0	19	0	Diploid
2022-PLATE-74_2022-137_176-2N_Fam9_16	Fam09	0 PSI	AB	AB	A	NA	AB	AB	A	A	AB	AB	A	AB	A	AB	AB	AB	A	A	A	NA	1	8	10	0	0	0	0	19	0	Diploid
2022-PLATE-74_2022-137_177-2N_Fam9_17	Fam09	0 PSI	AB	AB	AB	NA	AB	AB	AB	AB	AB	A	AB	AB	AB	AB	AB	AB	AB	A	AB	NA	1	2	16	0	0	0	0	19	0	Diploid
2022-PLATE-74_2022-137_178-2N_Fam9_18	Fam09	0 PSI	AB	A	A	NA	A	AB	AB	AB	AB	AB	AB	AB	AB	AB	AB	AB	A	A	A	NA	1	6	12	0	0	0	0	19	0	Diploid
2022-PLATE-74_2022-137_179-2N_Fam9_19	Fam09	0 PSI	A	AB	AB	NA	AB	AB	AB	AB	AB	AB	A	AB	AB	AB	AB	AB	AB	A	A	NA	1	4	14	0	0	0	0	19	0	Diploid
2022-PLATE-74_2022-137_181-2N_Fam10_01	Fam10	0 PSI	AB	AB	A	NA	A	AB	AB	AB	AB	AB	A	AB	AB	A	AB	AB	A	AB	AB	NA	1	5	13	0	0	0	0	19	0	Diploid
2022-PLATE-74_2022-137_182-2N_Fam10_02	Fam10	0 PSI	AB	AB	AB	NA	A	AB	AB	AB	AB	AB	A	AB	A	AB	AB	AB	AB	AB	AB	NA	1	3	15	0	0	0	0	19	0	Diploid
2022-PLATE-74_2022-137_183-2N_Fam10_03	Fam10	0 PSI	A	AB	AB	NA	AB	check	AB	A	AB	AB	A	AB	AB	AB	AB	AB	AB	A	AB	NA	1	4	13	0	0	0	0	19	0	Diploid
2022-PLATE-74_2022-137_184-2N_Fam10_04	Fam10	0 PSI	AB	AB	A	NA	AB	NA	AB	A	AB	AB	A	AB	A	A	AB	AB	AB	AB	AB	NA	2	5	12	0	0	0	0	19	0	Diploid
2022-PLATE-74_2022-137_185-2N_Fam10_05	Fam10	0 PSI	AB	A	AB	NA	AB	AB	A	AB	A	AB	AB	AB	A	AB	A	AB	AB	AB	AB	bp shift	1	5	13	0	0	0	0	19	0	Diploid
2022-PLATE-74_2022-137_186-2N_Fam10_06	Fam10	0 PSI	AB	AB	AB	NA	AB	AB	AB	AB	AB	AB	A	AB	AB	AB	AB	AB	A	A	AB	NA	1	3	15	0	0	0	0	19	0	Diploid
2022-PLATE-74_2022-137_187-2N_Fam10_07	Fam10	0 PSI	AB	AB	A	NA	A	AB	A	AB	AB	AB	A	AB	A	A	A	AB	AB	AB	A	NA	1	8	10	0	0	0	0	19	0	Diploid
2022-PLATE-74_2022-137_95-2N_Fam5_15	Fam05	0 PSI	AB	AB	A	NA	A	AB	AB	AB	A	AB	A	AB	A	AB	AB	AB	AB	A	AB	NA	1	6	12	0	0	0	0	19	0	Diploid
2022-PLATE-74_2022-137_96-2N_Fam5_16	Fam05	0 PSI	A	AB	A	NA	AB	AB	A	AB	AB	A	A	AB	A	AB	AB	AB	AB	A	A	NA	1	8	10	0	0	0	0	19	0	Diploid
2022-PLATE-74_2022-137_97-2N_Fam5_17	Fam05	0 PSI	A	AB	A	NA	AB	AB	A	AB	AB	AB	AB	AB	AB	AB	AB	AB	AB	A	AB	NA	1	4	14	0	0	0	0	19	0	Diploid
2022-PLATE-74_2022-137_98-2N_Fam5_18	Fam05	0 PSI	A	AB	A	NA	AB	AB	AB	AB	AB	AB	AB	AB	A	AB	AB	AB	A	A	AB	NA	1	5	13	0	0	0	0	19	0	Diploid
2022-PLATE-74_2022-137_99-2N_Fam5_19	Fam05	0 PSI	AB	AB	A	NA	A	AB	AB	AB	AB	AB	AB	AB	A	AB	AB	AB	A	A	AB	NA	1	5	13	0	0	0	0	19	0	Diploid
2022-PLATE-75_2022-137_189-2N_Fam10_09	Fam10	0 PSI	A	AB	AB	AB	A	NA	A	AB	A	AB	A	A	A	A	A	AB	AB	A	A	NA	1	11	7	0	0	0	0	19	0	Diploid
2022-PLATE-75_2022-137_190-2N_Fam10_10	Fam10	0 PSI	AB	AB	A	AB	A	NA	A	A	AB	AB	AB	AB	A	A	AB	AB	AB	AB	A	NA	1	7	11	0	0	0	0	19	0	Diploid
2022-PLATE-75_2022-137_191-2N_Fam10_11	Fam10	0 PSI	A	AB	AB	NA	AB	NA	check	AB	A	AB	A	AB	A	AB	A	AB	AB	A	AB	NA	2	6	10	0	0	0	0	19	0	Diploid
2022-PLATE-75_2022-137_192-2N_Fam10_12	Fam10	0 PSI	AB	AB	AB	AB	AB	AB	check	AB	A	AB	A	A	AB	AB	AB	AB	AB	A	A	NA	0	5	13	0	0	0	0	19	0	Diploid
2022-PLATE-75_2022-137_193-2N_Fam10_13	Fam10	0 PSI	AB	AB	AB	AB	A	NA	A	A	AB	AB	AB	A	A	AB	AB	AB	A	AB	A	NA	1	7	11	0	0	0	0	19	0	Diploid
2022-PLATE-75_2022-137_194-2N_Fam10_14	Fam10	0 PSI	A	AB	AB	AB	A	AB	check	A	AB	AB	A	AB	AB	A	AB	AB	AB	A	AB	NA	0	6	12	0	0	0	0	19	0	Diploid
2022-PLATE-75_2022-137_195-2N_Fam10_15	Fam10	0 PSI	AB	AB	A	NA	AB	AB	check	A	AB	AB	A	AB	AB	A	A	AB	AB	AB	AB	NA	1	5	12	0	0	0	0	19	0	Diploid
2022-PLATE-75_2022-137_196-2N_Fam10_16	Fam10	0 PSI	AB	AB	AB	NA	AB	AB	check	A	A	AB	AB	AB	AB	A	AB	AB	AB	A	AB	NA	1	4	13	0	0	0	0	19	0	Diploid
2022-PLATE-75_2022-137_197-2N_Fam10_17	Fam10	0 PSI	AB	AB	AB	NA	A	AB	check	A	AB	AB	AB	AB	AB	A	AB	AB	AB	AB	A	NA	1	4	13	0	0	0	0	19	0	Diploid
2022-PLATE-75_2022-137_198-2N_Fam10_18	Fam10	0 PSI	AB	AB	A	NA	AB	AB	check	AB	AB	AB	AB	AB	A	AB	AB	AB	A	A	AB	NA	1	4	13	0	0	0	0	19	0	Diploid
2022-PLATE-75_2022-137_199-2N_Fam10_19	Fam10	0 PSI	AB	AB	A	AB	AB	NA	check	AB	AB	AB	AB	AB	A	A	AB	AB	AB	AB	A	NA	1	4	13	0	0	0	0	19	0	Diploid
2022-PLATE-75_2022-137_200-2N_Fam10_20	Fam10	0 PSI	AB	AB	AB	AB	A	NA	AB	AB	A	AB	A	AB	AB	AB	AB	AB	AB	A	A	NA	1	5	13	0	0	0	0	19	0	Diploid
2022-PLATE-75_2022-137_201-2N_Fam11_01	Fam11	0 PSI	AB	AB	AB	AB	AB	NA	check	A	AB	AB	A	AB	A	AB	AB	AB	A	A	A	NA	1	6	11	0	0	0	0	19	0	Diploid
2022-PLATE-75_2022-137_202-2N_Fam11_02	Fam11	0 PSI	AB	AB	A	NA	AB	AB	AAB	A	AB	AB	AB	AB	AB	AB	AB	AB	AB	A	AB	2 paternal	1	3	14	1	0	0	1	19	0.0666667	Aneuploid
2022-PLATE-75_2022-137_203-2N_Fam11_03	Fam11	0 PSI	AB	A	A	AB	A	NA	check	A	AB	AB	AB	AB	AB	AB	AB	AB	AB	A	AB	NA	1	5	12	0	0	0	0	19	0	Diploid
2022-PLATE-75_2022-137_204-2N_Fam11_04	Fam11	0 PSI	A	AB	AB	NA	A	NA	AAB	A	A	AB	A	AB	AB	A	AB	AB	A	A	A	2 paternal	2	9	7	1	0	0	1	19	0.125	Aneuploid
2022-PLATE-75_2022-137_205-2N_Fam11_05	Fam11	0 PSI	AB	AB	A	AB	AB	NA	check	AB	A	AB	AB	AB	A	A	AB	AB	A	A	A	NA	1	7	10	0	0	0	0	19	0	Diploid
2022-PLATE-75_2022-137_206-2N_Fam11_06	Fam11	0 PSI	AB	A	A	NA	A	NA	check	AB	A	AB	A	AB	A	A	AB	AB	AB	A	A	NA	2	9	7	0	0	0	0	19	0	Diploid
2022-PLATE-75_2022-137_207-2N_Fam11_07	Fam11	0 PSI	AB	AB	A	AB	AB	NA	check	A	AB	AB	AB	A	AB	AB	AB	AB	A	A	A	NA	1	6	11	0	0	0	0	19	0	Diploid
2022-PLATE-75_2022-137_210-2N_Fam11_10	Fam11	0 PSI	AB	AB	A	NA	AB	NA	AB	AB	A	AB	AB	AB	A	AB	AB	AB	AB	A	AB	NA	2	4	13	0	0	0	0	19	0	Diploid
2022-PLATE-75_2022-137_211-2N_Fam11_11	Fam11	0 PSI	AB	AB	A	NA	AB	AB	AAB	A	AB	AB	AB	AB	A	A	AB	AB	AB	A	A	2 paternal	1	6	11	1	0	0	1	19	0.0833333	Aneuploid
2022-PLATE-75_2022-137_212-2N_Fam11_12	Fam11	0 PSI	A	AB	AB	NA	AB	NA	check	A	A	AB	A	AB	AB	A	AB	AB	AB	A	AB	NA	2	6	10	0	0	0	0	19	0	Diploid
2022-PLATE-75_2022-137_213-2N_Fam11_13	Fam11	0 PSI	AB	AB	AB	AB	A	NA	AAB	A	A	AB	AB	AB	A	A	AB	AB	AB	A	A	2 paternal	1	7	10	1	0	0	1	19	0.0909091	Aneuploid
2022-PLATE-75_2022-137_214-2N_Fam11_14	Fam11	0 PSI	AB	A	AB	AB	A	NA	AAB	AB	A	AB	A	AB	AB	A	AB	AB	A	A	AB	2 paternal	1	7	10	1	0	0	1	19	0.0909091	Aneuploid
2022-PLATE-75_2022-137_215-2N_Fam11_15	Fam11	0 PSI	AB	AB	AB	NA	A	NA	AAB	AB	A	AB	A	AB	AB	AB	AB	AB	AB	A	AB	2 paternal	2	4	12	1	0	0	1	19	0.0769231	Aneuploid
2022-PLATE-75_2022-137_217-2N_Fam11_17	Fam11	0 PSI	AB	AB	A	NA	A	NA	AAB	A	AB	AB	AB	AB	A	AB	AB	AB	A	A	AB	2 paternal	2	6	10	1	0	0	1	19	0.0909091	Aneuploid
2022-PLATE-75_2022-137_218-2N_Fam11_18	Fam11	0 PSI	AB	AB	A	AB	AB	NA	AAB	A	AB	AB	A	AB	A	A	AB	AB	A	A	AB	2 paternal	1	7	10	1	0	0	1	19	0.0909091	Aneuploid
2022-PLATE-75_2022-137_219-2N_Fam11_19	Fam11	0 PSI	A	AB	AB	NA	A	NA	check	A	AB	AB	A	AB	A	AB	AB	AB	AB	A	A	NA	2	7	9	0	0	0	0	19	0	Diploid
2022-PLATE-75_2022-137_220-2N_Fam11_20	Fam11	0 PSI	NA	NA	A	NA	AB	AB	AAB	A	AB	AB	AB	A	AB	AB	AB	AB	A	A	AB	2 paternal	3	5	10	1	0	0	1	19	0.0909091	Aneuploid
2022-PLATE-75_2022-137_221-2N_Fam12_01	Fam12	0 PSI	A	A	A	AB	AB	AB	check	AB	A	AB	AB	AB	A	AB	AB	AB	AB	AB	AB	NA	0	5	13	0	0	0	0	19	0	Diploid
2022-PLATE-75_2022-137_222-2N_Fam12_02	Fam12	0 PSI	AB	AB	A	AB	A	NA	check	AB	AB	AB	AB	AB	A	AB	AB	AB	A	AB	A	NA	1	5	12	0	0	0	0	19	0	Diploid
2022-PLATE-75_2022-137_223-2N_Fam12_03	Fam12	0 PSI	AB	A	A	AB	A	NA	A	AB	A	AB	A	A	AB	AB	A	AB	A	A	A	NA	1	11	7	0	0	0	0	19	0	Diploid
2022-PLATE-75_2022-137_224-2N_Fam12_04	Fam12	0 PSI	AB	AB	A	NA	AB	NA	check	AB	A	AB	AB	AB	A	AB	AB	AB	A	A	AB	NA	2	5	11	0	0	0	0	19	0	Diploid
2022-PLATE-75_2022-137_225-2N_Fam12_05	Fam12	0 PSI	A	AB	A	AB	A	NA	AB	AB	AB	AB	AB	AB	AB	AB	AB	AB	AB	AB	A	NA	1	4	14	0	0	0	0	19	0	Diploid
2022-PLATE-75_2022-137_226-2N_Fam12_06	Fam12	0 PSI	ABB	A	A	NA	ABB	NA	AAB	AAB	AAB	NA	ABC	ABC	ABB	ABB	ABC	ABC	AAB	AAB	AAB	2 paternal	3	2	0	6	4	4	14	19	1	Triploid
2022-PLATE-75_2022-137_227-2N_Fam12_07	Fam12	0 PSI	A	A	A	AB	AB	NA	check	AB	AB	AB	A	AB	AB	AB	AB	AB	AB	A	A	NA	1	6	11	0	0	0	0	19	0	Diploid
2022-PLATE-75_2022-137_228-2N_Fam12_08	Fam12	0 PSI	A	AB	A	NA	AB	NA	A	AB	AB	AB	AB	AB	AB	AB	A	AB	A	AB	A	NA	2	6	11	0	0	0	0	19	0	Diploid
2022-PLATE-75_2022-137_229-2N_Fam12_09	Fam12	0 PSI	A	A	A	AB	AB	NA	check	AAB	ABB	ABC	AB	AB	AB	AB	A	AB	A	AAB	A	NA	1	6	7	2	1	1	4	19	0.363636	Aneuploid
2022-PLATE-75_2022-137_231-2N_Fam12_11	Fam12	0 PSI	A	AB	A	NA	A	NA	AB	AB	AB	AB	AB	A	A	AB	AB	AB	A	A	AB	NA	2	7	10	0	0	0	0	19	0	Diploid
2022-PLATE-75_2022-137_232-2N_Fam12_12	Fam12	0 PSI	AB	AB	A	AB	AB	NA	A	AB	A	AB	AB	AB	AB	AB	A	AB	A	A	A	NA	1	7	11	0	0	0	0	19	0	Diploid
2022-PLATE-75_2022-137_233-2N_Fam12_13	Fam12	0 PSI	A	A	A	AB	AB	NA	AB	NA	A	AB	AB	AB	A	AB	AB	AB	AB	AB	A	NA	2	6	11	0	0	0	0	19	0	Diploid
2022-PLATE-75_2022-137_234-2N_Fam12_14	Fam12	0 PSI	AB	AB	A	AB	A	NA	A	AB	AB	AB	AB	AB	A	AB	A	AB	A	AB	A	NA	1	7	11	0	0	0	0	19	0	Diploid
2022-PLATE-75_2022-137_235-2N_Fam12_15	Fam12	0 PSI	A	AB	A	NA	AB	AB	AB	AB	A	AB	A	AB	A	AB	AB	AB	AB	AB	AB	NA	1	5	13	0	0	0	0	19	0	Diploid
2022-PLATE-75_2022-137_236-2N_Fam12_16	Fam12	0 PSI	A	AB	A	NA	A	AB	A	AB	A	AB	AB	AB	AB	AB	A	AB	A	AB	A	NA	1	8	10	0	0	0	0	19	0	Diploid
2022-PLATE-75_2022-137_237-2N_Fam12_17	Fam12	0 PSI	AB	A	A	AB	AB	NA	A	ABB	ABB	ABC	AB	AB	A	AB	AB	AB	AB	AAB	A	NA	1	5	9	1	2	1	4	19	0.307692	Aneuploid
2022-PLATE-75_2022-137_239-2N_Fam12_19	Fam12	0 PSI	A	A	A	AB	AB	NA	check	AB	A	AB	AB	AB	AB	AB	AB	AB	A	AB	AB	NA	1	5	12	0	0	0	0	19	0	Diploid
2022-PLATE-75_2022-137_240-2N_Fam12_20	Fam12	0 PSI	A	A	A	NA	AB	AB	check	AB	A	AB	A	AB	AB	AB	A	AB	A	AB	A	NA	1	8	9	0	0	0	0	19	0	Diploid
2022-PLATE-75_2022-1458_10-3N_Fam1_10	Fam01	9500 PSI	ABC	A	ABC	NA	A	ABB	ABB	ABB	A	ABC	A	ABC	AAB	ABC	ABC	ABB	ABC	AAB	AAB	NA	1	4	0	3	4	7	14	19	1	Triploid
2022-PLATE-75_2022-1458_11-3N_Fam1_11	Fam01	9500 PSI	ABC	A	ABC	NA	AAB	ABB	A	ABB	ABC	ABB	A	AAB	AAB	ABC	ABB	ABB	ABB	A	A	NA	1	5	0	3	6	4	13	19	1	Triploid
2022-PLATE-75_2022-1458_12-3N_Fam1_12	Fam01	9500 PSI	ABC	ABB	ABC	ABC	AAB	NA	A	ABC	AAB	ABC	A	AAB	AAB	ABC	ABB	ABB	ABB	AAB	A	bp shift	1	3	0	5	4	6	15	19	1	Triploid
2022-PLATE-75_2022-1458_13-3N_Fam1_13	Fam01	9500 PSI	ABC	ABB	ABC	NA	AAB	NA	A	ABB	AAB	ABC	AAB	AAB	AAB	ABC	ABB	ABB	AAB	AAB	A	NA	2	2	0	7	4	4	15	19	1	Triploid
2022-PLATE-75_2022-1458_1-3N_Fam1_01	Fam01	9500 PSI	ABC	A	ABC	ABC	AAB	NA	A	ABB	ABC	ABB	A	AAB	A	ABC	ABC	ABB	ABC	AAB	A	NA	1	5	0	3	3	7	13	19	1	Triploid
2022-PLATE-75_2022-1458_14-3N_Fam1_14	Fam01	9500 PSI	ABC	ABB	ABC	ABB	A	NA	ABB	ABC	AAB	ABC	AAB	ABC	AAB	ABC	ABC	ABB	ABC	AAB	AAB	NA	1	1	0	5	4	8	17	19	1	Triploid
2022-PLATE-75_2022-1458_15-3N_Fam1_15	Fam01	9500 PSI	ABC	ABB	ABC	NA	A	NA	A	ABC	ABC	ABC	A	ABC	AAB	ABC	AAB	ABB	A	ABB	A	NA	2	5	0	2	3	7	12	19	1	Triploid
2022-PLATE-75_2022-1458_16-3N_Fam1_16	Fam01	9500 PSI	ABC	ABB	ABC	NA	A	NA	ABB	ABB	ABC	ABB	AAB	ABC	A	ABC	ABB	ABB	ABB	AAB	A	NA	2	3	0	2	7	5	14	19	1	Triploid
2022-PLATE-75_2022-1458_17-3N_Fam1_17	Fam01	9500 PSI	ABC	A	ABC	NA	AAB	NA	A	ABB	AAB	ABB	A	AAB	A	ABC	ABC	ABB	ABC	A	A	NA	2	6	0	3	3	5	11	19	1	Triploid
2022-PLATE-75_2022-1458_18-3N_Fam1_18	Fam01	9500 PSI	ABC	A	ABC	AAB	AAB	NA	ABB	ABC	AAB	ABC	A	AAB	AAB	ABC	ABC	ABB	ABC	AAB	A	bp shift	1	3	0	6	2	7	15	19	1	Triploid
2022-PLATE-75_2022-1458_19-3N_Fam1_19	Fam01	9500 PSI	ABC	ABB	ABC	NA	A	NA	A	ABC	ABB	ABC	AAB	ABC	AAB	ABC	ABB	ABB	AAB	ABB	AAB	NA	2	2	0	4	5	6	15	19	1	Triploid
2022-PLATE-75_2022-1458_20-3N_Fam1_20	Fam01	9500 PSI	ABC	ABB	ABC	NA	A	NA	ABB	ABB	ABC	ABB	AAB	ABC	AAB	ABC	AAB	ABB	ABB	A	A	NA	2	3	0	3	6	5	14	19	1	Triploid
2022-PLATE-75_2022-1458_21-3N_Fam2_01	Fam02	9500 PSI	A	A	A	NA	A	NA	A	A	A	A	A	A	A	A	A	A	A	A	A	Missing maternal >5 loci	2	17	0	0	0	0	0	19	NA	NA
2022-PLATE-75_2022-1458_22-3N_Fam2_02	Fam02	9500 PSI	ABC	ABC	A	NA	AAB	NA	ABB	AAB	ABC	ABC	ABB	ABC	AAB	A	AAB	ABC	A	A	ABB	NA	2	4	0	4	3	6	13	19	1	Triploid
2022-PLATE-75_2022-1458_23-3N_Fam2_03	Fam02	9500 PSI	A	A	A	NA	A	NA	A	A	A	A	A	A	A	A	A	A	A	A	A	Missing maternal >5 loci	2	17	0	0	0	0	0	19	NA	NA
2022-PLATE-75_2022-1458_2-3N_Fam1_02	Fam01	9500 PSI	ABC	ABB	ABC	ABC	AAB	NA	ABB	AAB	A	ABB	A	AAB	AAB	ABC	ABB	ABB	ABB	A	A	NA	1	4	0	4	6	4	14	19	1	Triploid
2022-PLATE-75_2022-1458_24-3N_Fam2_04	Fam02	9500 PSI	ABC	AB	A	NA	AAB	NA	check	AAB	ABB	ABB	ABC	ABC	AB	A	AAB	ABC	A	ABB	A	NA	2	4	2	3	3	4	10	19	0.833333	Aneuploid
2022-PLATE-75_2022-1458_25-3N_Fam2_05	Fam02	9500 PSI	ABC	ABB	A	ABC	AAB	NA	ABB	ABC	A	ABB	ABC	ABC	A	ABB	AAB	ABC	ABB	AAB	ABB	NA	1	3	0	3	6	6	15	19	1	Triploid
2022-PLATE-75_2022-1458_26-3N_Fam2_06	Fam02	9500 PSI	ABC	ABB	A	NA	A	NA	AAB	AAB	A	NA	NA	AAB	NA	NA	AAB	ABC	NA	AAB	NA	NA	8	3	0	5	1	2	8	19	1	Triploid
2022-PLATE-75_2022-1458_27-3N_Fam2_07	Fam02	9500 PSI	ABC	ABC	A	NA	A	ABC	check	AAB	ABC	ABC	ABC	AAB	AAB	AAB	AAB	ABC	A	A	ABB	NA	1	4	0	5	1	7	13	19	1	Triploid
2022-PLATE-75_2022-1458_28-3N_Fam2_08	Fam02	9500 PSI	ABC	AAB	A	NA	A	ABC	check	ABC	ABB	ABB	ABB	AAB	A	ABB	AAB	ABC	ABB	AAB	ABB	bp shift	1	3	0	4	6	4	14	19	1	Triploid
2022-PLATE-75_2022-1458_29-3N_Fam2_09	Fam02	9500 PSI	ABC	AAB	A	NA	AAB	ABC	check	AAB	ABC	ABC	ABC	ABC	ABB	ABB	AAB	ABC	ABB	ABB	A	NA	1	2	0	4	4	7	15	19	1	Triploid
2022-PLATE-75_2022-1458_30-3N_Fam2_10	Fam02	9500 PSI	ABC	ABB	A	ABC	AAB	NA	ABB	AAB	ABC	ABC	ABC	ABC	ABB	A	AAB	ABC	A	A	ABB	NA	1	4	0	3	4	7	14	19	1	Triploid
2022-PLATE-75_2022-1458_31-3N_Fam2_11	Fam02	9500 PSI	ABC	ABB	A	ABC	A	ABC	check	AAB	ABC	ABC	ABC	AAB	AAB	ABB	AAB	ABC	ABB	AAB	A	NA	0	3	0	5	3	7	15	19	1	Triploid
2022-PLATE-75_2022-1458_32-3N_Fam2_12	Fam02	9500 PSI	ABC	ABC	A	ABC	AAB	NA	A	A	ABC	ABB	ABB	ABC	A	ABB	AAB	ABC	ABB	ABB	ABB	NA	1	4	0	2	6	6	14	19	1	Triploid
2022-PLATE-75_2022-1458_33-3N_Fam2_13	Fam02	9500 PSI	ABC	ABB	A	ABC	AB	NA	AAB	AAB	A	ABB	ABC	AB	ABB	AAB	AAB	ABC	A	AAB	ABC	NA	1	3	2	5	3	5	13	19	0.866667	Aneuploid
2022-PLATE-75_2022-1458_3-3N_Fam1_03	Fam01	9500 PSI	ABC	ABB	ABC	ABB	A	AAB	check	ABB	AAB	ABB	A	ABC	A	AAB	ABB	ABB	ABB	ABB	A	NA	0	4	0	3	8	3	14	19	1	Triploid
2022-PLATE-75_2022-1458_34-3N_Fam2_14	Fam02	9500 PSI	ABC	ABB	A	NA	AAB	ABC	check	ABB	AAB	ABC	ABB	ABC	A	ABB	AAB	ABC	ABB	AAB	AAB	NA	1	2	0	5	5	5	15	19	1	Triploid
2022-PLATE-75_2022-1458_35-3N_Fam2_15	Fam02	9500 PSI	ABC	ABB	A	ABC	A	NA	ABB	AAB	ABB	ABB	ABC	AAB	ABB	ABB	AAB	ABC	ABB	ABB	ABB	NA	1	2	0	3	9	4	16	19	1	Triploid
2022-PLATE-75_2022-1458_36-3N_Fam2_16	Fam02	9500 PSI	ABC	ABB	A	NA	AAB	ABC	check	ABC	ABC	ABB	A	ABC	A	ABB	AAB	ABC	ABB	AAB	ABB	NA	1	3	0	3	5	6	14	19	1	Triploid
2022-PLATE-75_2022-1458_37-3N_Fam2_17	Fam02	9500 PSI	ABC	ABC	A	NA	A	ABC	check	ABC	ABB	ABB	ABB	A	AAB	ABB	AAB	ABC	A	A	ABB	NA	1	5	0	2	5	5	12	19	1	Triploid
2022-PLATE-75_2022-1458_38-3N_Fam2_18	Fam02	9500 PSI	AB	ABC	A	NA	AAB	ABC	A	AAB	ABB	A	ABC	ABC	A	ABB	AAB	ABC	A	AAB	ABC	NA	1	5	1	4	2	6	12	19	0.923077	Aneuploid
2022-PLATE-75_2022-1458_39-3N_Fam2_19	Fam02	9500 PSI	ABC	ABB	A	ABC	AB	NA	check	A	ABB	ABC	AB	ABC	A	ABB	AAB	ABC	ABB	AAB	ABB	NA	1	3	2	2	5	5	12	19	0.857143	Aneuploid
2022-PLATE-75_2022-1458_40-3N_Fam2_20	Fam02	9500 PSI	ABC	ABC	A	ABC	AAB	NA	ABB	ABC	ABB	ABB	ABB	ABC	A	AAB	AAB	ABC	ABB	ABB	A	NA	1	3	0	3	6	6	15	19	1	Triploid
2022-PLATE-75_2022-1458_41-3N_Fam3_01	Fam03	9500 PSI	ABC	ABC	ABB	ABC	AAB	NA	A	AAB	AAB	AAB	AAB	ABC	AAB	AAB	AAB	ABC	ABB	AAB	A	NA	1	2	0	9	2	5	16	19	1	Triploid
2022-PLATE-75_2022-1458_42-3N_Fam3_02	Fam03	9500 PSI	ABC	ABC	ABB	ABB	AAB	ABC	ABB	ABC	AAB	ABC	ABC	ABC	A	AAB	A	ABC	ABC	AAB	AAB	NA	0	2	0	5	3	9	17	19	1	Triploid
2022-PLATE-75_2022-1458_4-3N_Fam1_04	Fam01	9500 PSI	ABC	ABB	ABC	NA	AAB	NA	ABB	AAB	A	ABB	AAB	AAB	AAB	ABC	ABB	ABB	ABB	AAB	AAB	NA	2	1	0	7	6	3	16	19	1	Triploid
2022-PLATE-75_2022-1458_5-3N_Fam1_05	Fam01	9500 PSI	ABC	A	ABC	ABB	A	NA	ABB	ABC	AAB	ABC	AAB	ABC	AAB	ABC	ABB	ABB	AAB	A	A	NA	1	4	0	4	4	6	14	19	1	Triploid
2022-PLATE-75_2022-1458_6-3N_Fam1_06	Fam01	9500 PSI	ABC	A	ABC	ABC	AAB	NA	A	ABB	ABC	ABB	AAB	AAB	A	ABB	ABB	ABB	AAB	AAB	A	NA	1	4	0	5	5	4	14	19	1	Triploid
2022-PLATE-75_2022-1458_7-3N_Fam1_07	Fam01	9500 PSI	AB	A	AB	AB	A	NA	A	ABC	ABC	ABB	AB	ABC	A	AB	ABC	AB	ABC	AAB	A	bp shift	1	5	6	1	1	5	7	19	0.538462	Aneuploid
2022-PLATE-75_2022-1458_8-3N_Fam1_08	Fam01	9500 PSI	ABC	A	ABC	ABC	A	NA	ABB	ABC	AAB	ABC	AAB	ABC	AAB	ABC	ABB	ABB	AAB	A	A	NA	1	4	0	4	3	7	14	19	1	Triploid
2022-PLATE-75_2022-1458_9-3N_Fam1_09	Fam01	9500 PSI	ABC	ABB	ABC	ABB	A	NA	ABB	ABC	AAB	ABC	AAB	ABC	AAB	ABC	AAB	ABB	A	ABB	AAB	NA	1	2	0	5	5	6	16	19	1	Triploid
2022-PLATE-76_2022-1458_100-3N_Fam5_20	Fam05	9500 PSI	AAB	AAB	NA	ABC	ABB	ABC	ABB	ABC	ABC	ABB	ABC	AAB	A	ABC	ABC	ABC	ABB	A	A	NA	1	3	0	3	4	8	15	19	1	Triploid
2022-PLATE-76_2022-1458_101-3N_Fam6_01	Fam06	9500 PSI	ABC	ABB	NA	ABC	AAB	ABC	A	ABB	AAB	ABC	A	A	A	AAB	AAB	ABC	AAB	A	AAB	NA	1	5	0	6	2	5	13	19	1	Triploid
2022-PLATE-76_2022-1458_102-3N_Fam6_02	Fam06	9500 PSI	ABC	ABB	AAB	ABB	A	ABC	AAB	NA	A	ABC	A	AAB	AAB	AAB	ABB	ABC	AAB	A	A	NA	1	5	0	6	3	4	13	19	1	Triploid
2022-PLATE-76_2022-1458_103-3N_Fam6_03	Fam06	9500 PSI	ABC	ABB	NA	ABB	ABB	ABB	AAB	ABB	ABB	ABB	A	ABB	A	AAB	AAB	ABC	AAB	A	AAB	NA	1	3	0	5	8	2	15	19	1	Triploid
2022-PLATE-76_2022-1458_104-3N_Fam6_04	Fam06	9500 PSI	AAB	A	AAB	ABB	A	NA	A	NA	AB	AB	A	ABB	ABB	AB	ABB	ABC	AAB	A	A	NA	2	6	3	3	4	1	8	19	0.727273	Aneuploid
2022-PLATE-76_2022-1458_105-3N_Fam6_05	Fam06	9500 PSI	ABC	ABB	AAB	AAB	A	ABC	AAB	ABB	ABC	ABB	AAB	ABB	ABB	AAB	AAB	ABC	AAB	A	A	NA	0	3	0	7	5	4	16	19	1	Triploid
2022-PLATE-76_2022-1458_106-3N_Fam6_06	Fam06	9500 PSI	AAB	ABB	NA	ABC	ABB	ABC	AAB	ABC	ABB	ABC	AAB	ABB	A	AAB	ABB	ABC	AAB	A	A	NA	1	3	0	5	5	5	15	19	1	Triploid
2022-PLATE-76_2022-1458_107-3N_Fam6_07	Fam06	9500 PSI	AAB	ABC	NA	ABC	A	ABC	A	AB	AB	A	A	ABB	ABB	AAB	ABB	ABC	AAB	A	AAB	NA	1	5	2	4	3	4	11	19	0.846154	Aneuploid
2022-PLATE-76_2022-1458_108-3N_Fam6_08	Fam06	9500 PSI	ABC	ABB	NA	ABB	NA	NA	AAB	A	AAB	AAB	AAB	AAB	A	AAB	ABB	ABC	AAB	A	AAB	NA	3	3	0	8	3	2	13	19	1	Triploid
2022-PLATE-76_2022-1458_109-3N_Fam6_09	Fam06	9500 PSI	ABC	AB	NA	AB	ABB	AB	AAB	ABB	ABB	ABC	A	ABB	ABB	AAB	AB	AB	AB	A	AAB	NA	1	2	6	3	5	2	10	19	0.625	Aneuploid
2022-PLATE-76_2022-1458_110-3N_Fam6_10	Fam06	9500 PSI	AAB	ABB	NA	AAB	AAB	ABC	A	ABC	AAB	ABC	AAB	AAB	A	AAB	ABB	ABC	AAB	A	AAB	NA	1	3	0	9	2	4	15	19	1	Triploid
2022-PLATE-76_2022-1458_111-3N_Fam6_11	Fam06	9500 PSI	AAB	ABB	NA	ABB	AAB	ABC	A	A	AAB	ABB	A	ABB	AAB	AAB	ABB	ABC	AAB	A	AAB	NA	1	4	0	7	5	2	14	19	1	Triploid
2022-PLATE-76_2022-1458_112-3N_Fam6_12	Fam06	9500 PSI	ABC	ABB	NA	ABB	A	AAB	AAB	ABC	ABB	ABC	AAB	AAB	ABB	AAB	AAB	ABC	AAB	A	A	NA	1	3	0	7	4	4	15	19	1	Triploid
2022-PLATE-76_2022-1458_113-3N_Fam6_13	Fam06	9500 PSI	AAB	AAB	NA	ABC	A	ABC	A	ABB	ABC	ABB	AB	AB	A	AAB	AAB	ABC	AAB	A	A	NA	1	5	2	5	2	4	11	19	0.846154	Aneuploid
2022-PLATE-76_2022-1458_114-3N_Fam6_14	Fam06	9500 PSI	AAB	ABB	NA	check	AAB	ABC	AAB	ABC	AAB	ABC	A	AAB	A	AAB	ABB	NA	AAB	A	AAB	NA	2	3	0	8	2	3	13	19	1	Triploid
2022-PLATE-76_2022-1458_115-3N_Fam6_15	Fam06	9500 PSI	ABC	ABB	NA	ABB	A	ABC	AAB	ABB	AAB	ABB	A	AAB	ABB	AAB	AB	ABC	AB	A	A	NA	1	4	2	4	5	3	12	19	0.857143	Aneuploid
2022-PLATE-76_2022-1458_116-3N_Fam6_16	Fam06	9500 PSI	AAB	ABB	AAB	ABC	ABB	ABC	AAB	ABB	ABC	ABB	AAB	ABB	ABB	AAB	AAB	ABC	AAB	A	A	NA	0	2	0	7	6	4	17	19	1	Triploid
2022-PLATE-76_2022-1458_117-3N_Fam6_17	Fam06	9500 PSI	AAB	ABC	AB	AB	AAB	AB	A	A	AAB	ABB	AAB	AAB	check	AAB	AAB	NA	AAB	A	A	NA	1	4	3	8	1	1	10	19	0.769231	Aneuploid
2022-PLATE-76_2022-1458_118-3N_Fam6_18	Fam06	9500 PSI	AAB	check	NA	A	AAB	ABC	AAB	ABC	AAB	ABC	AAB	AAB	ABB	AAB	ABB	NA	AAB	A	AAB	NA	2	2	0	9	2	3	14	19	1	Triploid
2022-PLATE-76_2022-1458_119-3N_Fam6_19	Fam06	9500 PSI	ABC	ABB	NA	ABC	A	ABC	A	ABC	AAB	ABC	A	ABB	ABB	AAB	ABB	ABC	AAB	A	A	NA	1	5	0	3	4	6	13	19	1	Triploid
2022-PLATE-76_2022-1458_120-3N_Fam6_20	Fam06	9500 PSI	ABC	ABB	AAB	ABB	A	ABB	AAB	NA	A	ABC	AAB	ABB	A	AAB	AAB	ABC	AAB	A	AAB	NA	1	4	0	7	4	3	14	19	1	Triploid
2022-PLATE-76_2022-1458_121-3N_Fam7_01	Fam07	9500 PSI	ABC	ABC	ABC	NA	ABB	ABC	ABB	ABC	ABC	A	AAB	ABB	AAB	AAB	AAB	ABC	A	A	AAB	NA	1	3	0	5	3	7	15	19	1	Triploid
2022-PLATE-76_2022-1458_122-3N_Fam7_02	Fam07	9500 PSI	ABC	ABC	NA	NA	ABB	ABC	ABB	AAB	AAB	ABB	ABC	ABB	A	AAB	AAB	ABC	A	A	A	NA	2	4	0	4	4	5	13	19	1	Triploid
2022-PLATE-76_2022-1458_123-3N_Fam7_03	Fam07	9500 PSI	AAB	ABC	ABC	NA	A	ABC	ABB	A	AB	AB	AAB	ABC	A	AAB	AAB	AB	ABB	A	AAB	NA	1	4	3	5	2	4	11	19	0.785714	Aneuploid
2022-PLATE-76_2022-1458_124-3N_Fam7_04	Fam07	9500 PSI	AAB	ABC	ABC	AAB	A	ABC	ABB	ABC	ABB	A	AAB	ABC	A	AAB	A	ABC	A	A	AAB	NA	0	6	0	5	2	6	13	19	1	Triploid
2022-PLATE-76_2022-1458_125-3N_Fam7_05	Fam07	9500 PSI	ABC	ABC	NA	ABB	ABB	ABC	ABB	ABC	AAB	A	AAB	AAB	A	AAB	AAB	ABC	A	A	AAB	bp shift	1	4	0	6	3	5	14	19	1	Triploid
2022-PLATE-76_2022-1458_126-3N_Fam7_06	Fam07	9500 PSI	ABC	ABC	NA	AAB	ABB	ABB	ABB	A	ABC	ABB	ABC	ABB	AAB	AAB	ABC	ABC	ABB	A	AAB	NA	1	2	0	4	6	6	16	19	1	Triploid
2022-PLATE-76_2022-1458_127-3N_Fam7_07	Fam07	9500 PSI	ABC	ABC	NA	AAB	ABB	ABC	ABB	ABC	ABB	A	ABC	ABB	A	AAB	ABB	ABC	A	A	AAB	NA	1	4	0	3	5	6	14	19	1	Triploid
2022-PLATE-76_2022-1458_128-3N_Fam7_08	Fam07	9500 PSI	ABC	ABC	ABC	A	AAB	ABC	ABB	NA	ABB	A	ABC	ABC	A	AAB	AAB	ABC	A	A	ABB	NA	1	5	0	3	3	7	13	19	1	Triploid
2022-PLATE-76_2022-1458_129-3N_Fam7_09	Fam07	9500 PSI	AAB	ABC	ABC	AAB	A	AAB	ABB	NA	A	ABB	AAB	ABC	AAB	AAB	ABC	ABC	ABB	A	AAB	NA	1	3	0	7	3	5	15	19	1	Triploid
2022-PLATE-76_2022-1458_130-3N_Fam7_10	Fam07	9500 PSI	ABC	ABC	ABC	NA	A	ABC	ABB	NA	ABC	ABB	ABB	ABC	AAB	AAB	AAB	ABC	A	A	AAB	NA	2	3	0	4	3	7	14	19	1	Triploid
2022-PLATE-76_2022-1458_131-3N_Fam7_11	Fam07	9500 PSI	AAB	ABC	ABC	NA	ABB	ABC	ABB	ABC	ABB	A	ABC	ABB	A	AAB	ABB	ABC	A	A	AAB	NA	1	4	0	3	5	6	14	19	1	Triploid
2022-PLATE-76_2022-1458_132-3N_Fam7_12	Fam07	9500 PSI	AAB	ABC	ABC	AAB	NA	AAB	ABB	NA	ABB	A	AAB	ABB	AAB	AAB	AAB	ABC	ABB	A	AAB	NA	2	2	0	8	4	3	15	19	1	Triploid
2022-PLATE-76_2022-1458_133-3N_Fam7_13	Fam07	9500 PSI	AAB	ABC	NA	AAB	NA	ABC	ABB	NA	ABC	A	AAB	ABB	AAB	AAB	ABB	ABC	A	A	AAB	NA	3	3	0	6	3	4	13	19	1	Triploid
2022-PLATE-76_2022-1458_134-3N_Fam7_14	Fam07	9500 PSI	ABC	ABC	NA	AAB	ABB	ABC	ABB	NA	ABC	ABB	ABC	ABB	AAB	AAB	ABC	ABC	ABB	A	AAB	NA	2	1	0	4	5	7	16	19	1	Triploid
2022-PLATE-76_2022-1458_135-3N_Fam7_15	Fam07	9500 PSI	AAB	ABC	NA	NA	ABB	ABC	ABB	NA	ABB	ABB	ABC	AAB	AAB	AAB	ABC	ABC	ABB	A	ABB	NA	3	1	0	4	6	5	15	19	1	Triploid
2022-PLATE-76_2022-1458_136-3N_Fam7_16	Fam07	9500 PSI	AAB	ABC	ABC	A	ABB	ABC	ABB	NA	ABB	ABB	AAB	ABB	AAB	AAB	A	ABC	A	A	AAB	NA	1	4	0	5	5	4	14	19	1	Triploid
2022-PLATE-76_2022-1458_43-3N_Fam3_03	Fam03	9500 PSI	ABC	ABC	ABB	ABC	AAB	ABB	A	NA	A	ABC	ABC	ABC	AAB	AAB	A	ABC	ABC	AAB	AAB	NA	1	3	0	5	2	8	15	19	1	Triploid
2022-PLATE-76_2022-1458_44-3N_Fam3_04	Fam03	9500 PSI	ABC	ABC	NA	ABC	NA	ABC	ABB	ABC	A	ABC	AAB	ABC	A	AAB	A	ABC	ABC	ABB	A	NA	2	4	0	2	2	9	13	19	1	Triploid
2022-PLATE-76_2022-1458_45-3N_Fam3_05	Fam03	9500 PSI	ABC	ABC	NA	ABC	AAB	ABB	A	ABC	A	ABC	AAB	ABC	AAB	AAB	AAB	ABC	ABB	AAB	AAB	NA	1	2	0	7	2	7	16	19	1	Triploid
2022-PLATE-76_2022-1458_46-3N_Fam3_06	Fam03	9500 PSI	ABC	ABC	ABB	ABC	A	ABC	A	ABC	A	ABC	AAB	AAB	AAB	AAB	AAB	ABC	ABB	AAB	AAB	NA	0	3	0	7	2	7	16	19	1	Triploid
2022-PLATE-76_2022-1458_47-3N_Fam3_07	Fam03	9500 PSI	ABC	ABC	ABB	ABC	AAB	ABC	ABB	ABC	A	ABC	ABC	ABC	A	AAB	A	ABC	ABC	A	A	NA	0	5	0	2	2	10	14	19	1	Triploid
2022-PLATE-76_2022-1458_48-3N_Fam3_08	Fam03	9500 PSI	ABC	ABC	NA	ABC	NA	ABC	A	ABC	AAB	ABC	AAB	AAB	A	AAB	AAB	ABC	ABB	AAB	A	NA	2	3	0	6	1	7	14	19	1	Triploid
2022-PLATE-76_2022-1458_49-3N_Fam3_09	Fam03	9500 PSI	ABC	ABC	NA	ABC	NA	ABC	A	ABC	AAB	ABC	AAB	ABB	AAB	AAB	A	ABC	ABC	AAB	AAB	NA	2	2	0	6	1	8	15	19	1	Triploid
2022-PLATE-76_2022-1458_50-3N_Fam3_10	Fam03	9500 PSI	ABC	ABC	NA	ABC	NA	ABC	A	ABC	AAB	ABC	ABC	AAB	A	AAB	AAB	ABC	ABB	AAB	A	NA	2	3	0	5	1	8	14	19	1	Triploid
2022-PLATE-76_2022-1458_51-3N_Fam3_11	Fam03	9500 PSI	ABC	ABC	ABB	ABC	A	ABC	ABB	check	A	ABC	ABC	AAB	AAB	AAB	AAB	ABC	ABB	A	AAB	NA	0	3	0	5	3	7	15	19	1	Triploid
2022-PLATE-76_2022-1458_52-3N_Fam3_12	Fam03	9500 PSI	ABC	ABC	NA	ABC	NA	ABC	ABB	ABC	A	ABC	AAB	AAB	A	AAB	AAB	ABC	ABB	AAB	A	NA	2	3	0	5	2	7	14	19	1	Triploid
2022-PLATE-76_2022-1458_53-3N_Fam3_13	Fam03	9500 PSI	ABC	ABC	NA	ABC	AAB	ABC	ABB	ABC	A	ABC	AAB	ABC	A	AAB	AAB	ABC	ABB	AAB	A	NA	1	3	0	5	2	8	15	19	1	Triploid
2022-PLATE-76_2022-1458_54-3N_Fam3_14	Fam03	9500 PSI	ABC	ABC	NA	ABC	AAB	ABC	A	ABC	AAB	ABC	AAB	ABC	AAB	AAB	AAB	ABC	ABB	ABB	AAB	NA	1	1	0	7	2	8	17	19	1	Triploid
2022-PLATE-76_2022-1458_55-3N_Fam3_15	Fam03	9500 PSI	ABC	ABC	NA	ABC	AAB	ABC	ABB	NA	A	ABC	ABB	ABC	A	AAB	AAB	ABC	ABB	ABB	A	NA	2	3	0	3	4	7	14	19	1	Triploid
2022-PLATE-76_2022-1458_56-3N_Fam3_16	Fam03	9500 PSI	ABC	ABC	NA	ABB	NA	ABC	A	ABC	A	ABC	AAB	ABB	AAB	AAB	AAB	ABC	ABB	AAB	A	NA	2	3	0	5	3	6	14	19	1	Triploid
2022-PLATE-76_2022-1458_57-3N_Fam3_17	Fam03	9500 PSI	ABC	AAB	NA	ABC	AAB	ABC	A	ABB	AAB	ABC	A	ABC	A	AAB	A	ABC	ABC	AAB	AAB	bp shift	1	4	0	6	1	7	14	19	1	Triploid
2022-PLATE-76_2022-1458_58-3N_Fam3_18	Fam03	9500 PSI	ABC	ABC	NA	ABC	AAB	ABB	ABB	AAB	AAB	ABC	ABC	ABC	A	AAB	AAB	ABC	ABB	AAB	AAB	NA	1	1	0	7	3	7	17	19	1	Triploid
2022-PLATE-76_2022-1458_59-3N_Fam3_19	Fam03	9500 PSI	ABC	AAB	NA	ABC	NA	ABC	A	ABB	A	ABB	ABC	AAB	A	AAB	AAB	ABC	AAB	AAB	A	NA	2	4	0	6	2	5	13	19	1	Triploid
2022-PLATE-76_2022-1458_60-3N_Fam3_20	Fam03	9500 PSI	ABC	ABC	NA	ABC	AAB	ABB	A	ABB	A	ABC	AAB	ABC	A	AAB	A	ABC	ABC	AAB	AAB	NA	1	4	0	5	2	7	14	19	1	Triploid
2022-PLATE-76_2022-1458_61-3N_Fam4_01	Fam04	9500 PSI	ABC	ABC	NA	ABC	AAB	ABC	ABB	A	AAB	ABC	AAB	AAB	A	AAB	AAB	ABC	ABC	AAB	A	NA	1	3	0	7	1	7	15	19	1	Triploid
2022-PLATE-76_2022-1458_62-3N_Fam4_02	Fam04	9500 PSI	ABC	ABC	NA	ABC	AAB	ABC	ABB	A	ABC	AAB	ABB	AAB	AAB	AAB	AAB	AAB	ABB	AAB	A	NA	1	2	0	8	3	5	16	19	1	Triploid
2022-PLATE-76_2022-1458_63-3N_Fam4_03	Fam04	9500 PSI	ABC	ABC	AAB	ABB	A	ABC	ABB	ABB	ABB	ABC	ABC	ABC	A	AAB	AAB	ABC	ABB	AAB	AAB	NA	0	2	0	5	5	7	17	19	1	Triploid
2022-PLATE-76_2022-1458_64-3N_Fam4_04	Fam04	9500 PSI	AAB	ABB	NA	ABC	NA	ABC	ABB	ABB	AAB	ABC	AAB	ABC	A	AAB	AAB	ABC	ABB	AAB	AAB	NA	2	1	0	7	4	5	16	19	1	Triploid
2022-PLATE-76_2022-1458_65-3N_Fam4_05	Fam04	9500 PSI	AAB	ABB	NA	ABC	A	ABC	ABB	ABB	AAB	ABC	ABC	ABC	AAB	AAB	AAB	ABC	AAB	AAB	AAB	NA	1	1	0	8	3	6	17	19	1	Triploid
2022-PLATE-76_2022-1458_66-3N_Fam4_06	Fam04	9500 PSI	ABC	ABB	NA	ABB	A	AAB	ABB	ABB	ABC	ABC	ABC	ABC	AAB	AAB	AAB	ABC	ABB	AAB	AAB	NA	1	1	0	6	5	6	17	19	1	Triploid
2022-PLATE-76_2022-1458_67-3N_Fam4_07	Fam04	9500 PSI	A	ABB	NA	ABB	AAB	ABC	ABB	NA	ABB	ABC	ABC	AAB	A	AAB	AAB	ABC	ABC	AAB	A	NA	2	3	0	5	4	5	14	19	1	Triploid
2022-PLATE-76_2022-1458_68-3N_Fam4_08	Fam04	9500 PSI	ABC	ABB	NA	AAB	NA	AAB	ABB	ABB	ABC	ABC	ABB	ABC	A	AAB	AAB	ABC	ABB	ABB	AAB	NA	2	1	0	5	6	5	16	19	1	Triploid
2022-PLATE-76_2022-1458_69-3N_Fam4_09	Fam04	9500 PSI	ABC	ABB	NA	ABB	AAB	ABC	ABB	ABB	AAB	ABC	ABC	AAB	AAB	AAB	AAB	AAB	ABB	AAB	AAB	NA	1	0	0	9	5	4	18	19	1	Triploid
2022-PLATE-76_2022-1458_70-3N_Fam4_10	Fam04	9500 PSI	ABC	ABC	NA	ABC	A	ABC	ABB	A	AAB	ABC	ABC	AAB	AAB	AAB	AAB	ABC	ABB	AAB	AAB	NA	1	2	0	7	2	7	16	19	1	Triploid
2022-PLATE-76_2022-1458_71-3N_Fam4_11	Fam04	9500 PSI	AAB	ABB	NA	ABB	NA	ABC	ABB	A	ABC	ABC	ABC	ABC	AAB	AAB	AAB	AAB	ABC	AAB	A	NA	2	2	0	6	3	6	15	19	1	Triploid
2022-PLATE-76_2022-1458_72-3N_Fam4_12	Fam04	9500 PSI	ABC	ABB	NA	ABB	AAB	AAB	ABB	A	ABC	ABC	ABB	AAB	AAB	AAB	AAB	ABC	AAB	AAB	A	NA	1	2	0	8	4	4	16	19	1	Triploid
2022-PLATE-76_2022-1458_73-3N_Fam4_13	Fam04	9500 PSI	AAB	ABB	NA	ABC	AAB	ABC	ABB	A	ABC	ABC	ABC	AAB	A	AAB	AAB	ABC	ABB	AAB	AAB	NA	1	2	0	7	3	6	16	19	1	Triploid
2022-PLATE-76_2022-1458_74-3N_Fam4_14	Fam04	9500 PSI	AAB	ABC	NA	ABB	NA	ABC	ABB	check	ABB	ABC	AAB	ABC	AAB	AAB	AAB	AAB	ABB	AAB	AAB	NA	2	0	0	8	4	4	16	19	1	Triploid
2022-PLATE-76_2022-1458_75-3N_Fam4_15	Fam04	9500 PSI	ABC	ABB	NA	ABB	NA	NA	NA	NA	AAB	ABC	ABC	ABC	A	AAB	AAB	AAB	ABB	ABB	AAB	NA	5	1	0	5	4	4	13	19	1	Triploid
2022-PLATE-76_2022-1458_76-3N_Fam4_16	Fam04	9500 PSI	AAB	ABB	NA	ABC	AAB	ABC	ABB	ABB	AAB	ABC	AAB	AAB	AAB	AAB	AAB	ABC	ABC	AAB	AAB	NA	1	0	0	10	3	5	18	19	1	Triploid
2022-PLATE-76_2022-1458_77-3N_Fam4_17	Fam04	9500 PSI	AAB	ABB	NA	ABC	AAB	ABC	ABB	ABB	AAB	ABC	AAB	AAB	AAB	AAB	AAB	AAB	ABC	AAB	A	NA	1	1	0	10	3	4	17	19	1	Triploid
2022-PLATE-76_2022-1458_78-3N_Fam4_18	Fam04	9500 PSI	ABC	ABB	NA	ABC	A	ABC	ABB	ABB	ABC	ABC	ABC	ABC	A	AAB	AAB	ABC	ABC	A	AAB	NA	1	3	0	3	3	9	15	19	1	Triploid
2022-PLATE-76_2022-1458_79-3N_Fam4_19	Fam04	9500 PSI	ABC	ABC	AAB	ABB	AAB	ABC	ABB	A	ABC	ABC	AAB	AAB	AAB	AAB	AAB	AAB	A	ABB	A	NA	0	3	0	8	3	5	16	19	1	Triploid
2022-PLATE-76_2022-1458_80-3N_Fam4_20	Fam04	9500 PSI	ABC	ABB	NA	ABB	A	ABC	ABB	A	ABC	ABC	A	ABC	A	AAB	AAB	ABC	AAB	AAB	A	NA	1	5	0	4	3	6	13	19	1	Triploid
2022-PLATE-76_2022-1458_81-3N_Fam5_01	Fam05	9500 PSI	AAB	AAB	NA	AAB	ABB	ABC	ABB	ABC	ABC	ABB	AAB	AAB	A	ABC	AAB	ABC	ABB	A	A	NA	1	3	0	6	4	5	15	19	1	Triploid
2022-PLATE-76_2022-1458_82-3N_Fam5_02	Fam05	9500 PSI	AAB	ABB	NA	ABC	A	ABC	ABB	AAB	AAB	ABB	AAB	ABB	A	ABC	ABC	ABC	ABC	A	AAB	NA	1	3	0	5	4	6	15	19	1	Triploid
2022-PLATE-76_2022-1458_83-3N_Fam5_03	Fam05	9500 PSI	ABC	ABB	NA	ABC	A	ABC	AAB	NA	AAB	ABC	ABC	ABB	AAB	ABC	ABC	ABC	ABB	A	ABB	NA	2	2	0	3	4	8	15	19	1	Triploid
2022-PLATE-76_2022-1458_84-3N_Fam5_04	Fam05	9500 PSI	AAB	ABB	NA	ABC	ABB	ABC	ABB	ABB	AAB	ABC	ABC	AAB	A	ABC	AAB	ABC	AAB	A	ABB	NA	1	2	0	5	5	6	16	19	1	Triploid
2022-PLATE-76_2022-1458_85-3N_Fam5_05	Fam05	9500 PSI	AAB	AAB	NA	ABC	A	ABC	AAB	ABC	ABC	ABC	AAB	ABB	A	ABC	ABC	ABC	ABB	A	ABB	NA	1	3	0	4	3	8	15	19	1	Triploid
2022-PLATE-76_2022-1458_86-3N_Fam5_06	Fam05	9500 PSI	ABC	ABB	NA	ABC	A	ABC	A	ABC	ABC	ABC	AAB	ABB	A	ABC	ABC	ABC	ABC	A	ABB	NA	1	4	0	1	3	10	14	19	1	Triploid
2022-PLATE-76_2022-1458_87-3N_Fam5_07	Fam05	9500 PSI	ABC	AAB	NA	ABC	ABB	AAB	A	AAB	AAB	A	ABC	AAB	A	ABC	ABC	ABC	ABC	A	A	NA	1	5	0	5	1	7	13	19	1	Triploid
2022-PLATE-76_2022-1458_88-3N_Fam5_08	Fam05	9500 PSI	AAB	ABB	NA	ABC	NA	ABC	ABB	check	A	ABC	AAB	ABB	AAB	ABB	ABC	ABC	ABC	A	ABB	NA	2	2	0	3	5	6	14	19	1	Triploid
2022-PLATE-76_2022-1458_89-3N_Fam5_09	Fam05	9500 PSI	ABC	AAB	NA	ABC	ABB	ABC	A	NA	AAB	ABC	ABC	AAB	AAB	ABC	ABB	ABC	AAB	A	ABB	NA	2	2	0	5	3	7	15	19	1	Triploid
2022-PLATE-76_2022-1458_90-3N_Fam5_10	Fam05	9500 PSI	ABC	ABB	NA	ABC	ABB	ABC	ABB	ABC	ABC	ABB	NA	AAB	AAB	NA	ABC	ABC	ABB	A	AAB	NA	3	1	0	3	5	7	15	19	1	Triploid
2022-PLATE-76_2022-1458_91-3N_Fam5_11	Fam05	9500 PSI	ABC	AAB	NA	ABC	ABB	ABC	A	ABC	ABC	ABB	ABC	AAB	AAB	ABC	ABB	ABC	AAB	A	A	NA	1	3	0	4	3	8	15	19	1	Triploid
2022-PLATE-76_2022-1458_92-3N_Fam5_12	Fam05	9500 PSI	ABC	ABB	NA	ABC	ABB	AAB	ABB	ABB	A	ABC	ABC	AAB	AAB	ABC	ABC	ABC	ABC	A	A	NA	1	3	0	3	4	8	15	19	1	Triploid
2022-PLATE-76_2022-1458_93-3N_Fam5_13	Fam05	9500 PSI	ABC	ABB	NA	ABC	ABB	ABC	AAB	ABC	AAB	ABC	ABC	AAB	A	ABC	AAB	ABC	A	A	AAB	NA	1	3	0	5	2	8	15	19	1	Triploid
2022-PLATE-76_2022-1458_94-3N_Fam5_14	Fam05	9500 PSI	AAB	AAB	NA	AAB	ABB	ABC	ABB	ABC	AAB	ABC	ABC	AAB	AAB	ABC	ABC	ABC	ABB	A	A	NA	1	2	0	6	3	7	16	19	1	Triploid
2022-PLATE-76_2022-1458_95-3N_Fam5_15	Fam05	9500 PSI	ABC	ABB	NA	ABC	ABB	ABC	AAB	ABC	AAB	ABC	AAB	AAB	A	ABC	ABC	ABC	ABB	A	ABB	NA	1	2	0	4	4	8	16	19	1	Triploid
2022-PLATE-76_2022-1458_96-3N_Fam5_16	Fam05	9500 PSI	AAB	AAB	NA	ABC	ABB	ABC	AAB	ABC	ABC	ABB	ABC	AAB	AAB	ABC	ABC	ABC	ABC	A	ABB	NA	1	1	0	5	3	9	17	19	1	Triploid
2022-PLATE-76_2022-1458_97-3N_Fam5_17	Fam05	9500 PSI	ABC	ABB	A	ABC	ABB	ABC	ABB	NA	ABC	ABB	ABC	AAB	A	ABC	ABC	ABC	ABB	A	A	NA	1	4	0	1	5	8	14	19	1	Triploid
2022-PLATE-76_2022-1458_98-3N_Fam5_18	Fam05	9500 PSI	ABC	ABB	NA	ABC	A	ABC	ABB	ABC	AAB	ABC	AAB	ABB	A	AAB	ABB	ABC	ABB	A	ABB	NA	1	3	0	3	6	6	15	19	1	Triploid
2022-PLATE-76_2022-1458_99-3N_Fam5_19	Fam05	9500 PSI	AAB	AAB	NA	ABC	ABB	ABC	ABB	ABC	AAB	ABC	AAB	AAB	A	ABB	AAB	ABC	ABC	A	ABB	NA	1	2	0	6	4	6	16	19	1	Triploid
2022-PLATE-77_2022-1458_137-3N_Fam7_17	Fam07	9500 PSI	NA	NA	ABC	AAB	A	ABC	ABB	ABB	ABB	ABB	AAB	AAB	A	AAB	AAB	ABC	A	A	ABB	NA	2	4	0	5	5	3	13	19	1	Triploid
2022-PLATE-77_2022-1458_138-3N_Fam7_18	Fam07	9500 PSI	NA	NA	ABC	AAB	A	ABC	ABB	ABC	A	A	AAB	ABC	AAB	AAB	ABC	ABC	ABB	A	AAB	NA	2	4	0	5	2	6	13	19	1	Triploid
2022-PLATE-77_2022-1458_139-3N_Fam7_19	Fam07	9500 PSI	NA	NA	ABC	AAB	AAB	ABC	ABB	ABC	ABB	A	AAB	ABC	A	AAB	ABB	ABC	A	A	ABB	NA	2	4	0	4	4	5	13	19	1	Triploid
2022-PLATE-77_2022-1458_140-3N_Fam7_20	Fam07	9500 PSI	NA	NA	ABC	AAB	NA	AAB	ABB	ABC	ABB	A	A	ABC	AAB	AAB	ABC	ABC	ABB	A	A	NA	3	4	0	4	3	5	12	19	1	Triploid
2022-PLATE-77_2022-1458_141-3N_Fam8_01	Fam08	9500 PSI	NA	NA	ABC	ABC	NA	ABC	ABB	ABC	AAB	ABC	AAB	AAB	AAB	AAB	AAB	ABC	ABB	A	A	NA	3	2	0	6	2	6	14	19	1	Triploid
2022-PLATE-77_2022-1458_142-3N_Fam8_02	Fam08	9500 PSI	NA	NA	ABC	ABC	A	AAB	ABB	ABB	ABC	ABB	AAB	ABC	A	AAB	AAB	ABC	A	A	AAB	NA	2	4	0	5	3	5	13	19	1	Triploid
2022-PLATE-77_2022-1458_144-3N_Fam8_04	Fam08	9500 PSI	NA	NA	ABC	ABC	A	NA	ABB	AAB	ABB	ABB	A	ABC	AAB	A	AAB	ABC	ABB	A	ABC	NA	3	4	0	3	4	5	12	19	1	Triploid
2022-PLATE-77_2022-1458_145-3N_Fam8_05	Fam08	9500 PSI	NA	NA	ABC	ABC	A	AAB	AB	ABC	AAB	ABC	AAB	ABC	A	AAB	AAB	ABC	A	A	ABC	NA	2	4	1	5	0	7	12	19	0.923077	Aneuploid
2022-PLATE-77_2022-1458_146-3N_Fam8_06	Fam08	9500 PSI	NA	NA	ABC	AAB	A	AAB	ABB	ABC	AAB	ABC	A	ABC	A	AAB	AAB	ABC	A	A	A	NA	2	6	0	5	1	5	11	19	1	Triploid
2022-PLATE-77_2022-1458_147-3N_Fam8_07	Fam08	9500 PSI	NA	NA	ABC	ABC	AAB	ABC	ABB	AAB	AAB	ABB	A	AAB	A	AAB	AAB	ABC	A	A	ABB	NA	2	4	0	6	3	4	13	19	1	Triploid
2022-PLATE-77_2022-1458_148-3N_Fam8_08	Fam08	9500 PSI	NA	NA	ABC	ABC	AAB	AAB	AB	A	AAB	ABB	AAB	AAB	A	AAB	AAB	ABC	A	A	ABB	NA	2	4	1	7	2	3	12	19	0.923077	Aneuploid
2022-PLATE-77_2022-1458_149-3N_Fam8_09	Fam08	9500 PSI	NA	NA	ABC	ABC	A	NA	ABB	ABB	A	ABB	AAB	ABB	A	AAB	AAB	ABC	ABB	A	ABB	NA	3	4	0	3	6	3	12	19	1	Triploid
2022-PLATE-77_2022-1458_150-3N_Fam8_10	Fam08	9500 PSI	NA	NA	ABC	ABC	A	NA	ABB	ABC	A	ABC	A	ABB	A	AAB	AAB	ABC	ABB	A	A	NA	3	6	0	2	3	5	10	19	1	Triploid
2022-PLATE-77_2022-1458_151-3N_Fam8_11	Fam08	9500 PSI	NA	NA	ABC	ABC	AAB	AAB	ABB	check	AAB	ABB	AAB	ABB	AAB	AAB	AAB	ABC	A	A	ABB	NA	2	2	0	7	4	3	14	19	1	Triploid
2022-PLATE-77_2022-1458_152-3N_Fam8_12	Fam08	9500 PSI	NA	NA	ABC	ABC	A	AAB	AB	ABC	AAB	ABC	A	ABC	A	AAB	AAB	ABC	ABB	A	A	NA	2	5	1	4	1	6	11	19	0.916667	Aneuploid
2022-PLATE-77_2022-1458_153-3N_Fam8_13	Fam08	9500 PSI	NA	NA	ABC	AAB	AAB	AAB	ABB	A	AAB	ABB	AAB	A	A	AAB	AAB	ABC	ABB	A	AAB	NA	2	4	0	8	3	2	13	19	1	Triploid
2022-PLATE-77_2022-1458_154-3N_Fam8_14	Fam08	9500 PSI	NA	NA	NA	ABC	AAB	NA	NA	NA	ABC	ABC	A	AAB	AAB	A	AAB	ABC	ABB	A	NA	NA	7	3	0	4	1	4	9	19	1	Triploid
2022-PLATE-77_2022-1458_155-3N_Fam8_15	Fam08	9500 PSI	NA	NA	ABC	AAB	A	NA	AB	ABC	ABC	ABC	A	ABC	AAB	AAB	AAB	ABC	A	A	ABC	NA	3	4	1	4	0	7	11	19	0.916667	Aneuploid
2022-PLATE-77_2022-1458_156-3N_Fam8_16	Fam08	9500 PSI	NA	NA	ABC	ABC	AAB	NA	AB	ABB	ABC	ABB	A	AAB	AAB	AAB	AAB	ABC	ABB	A	A	NA	3	3	1	5	3	4	12	19	0.923077	Aneuploid
2022-PLATE-77_2022-1458_157-3N_Fam8_17	Fam08	9500 PSI	NA	NA	ABC	ABC	AAB	AAB	ABB	AAB	ABB	ABC	AAB	AAB	A	ABB	AAB	ABC	ABB	A	AAB	NA	2	2	0	7	4	4	15	19	1	Triploid
2022-PLATE-77_2022-1458_158-3N_Fam8_18	Fam08	9500 PSI	NA	NA	ABC	ABC	AAB	AAB	ABB	AAB	ABB	ABC	A	AAB	A	AAB	AAB	ABC	A	A	AAB	NA	2	4	0	7	2	4	13	19	1	Triploid
2022-PLATE-77_2022-1458_159-3N_Fam8_19	Fam08	9500 PSI	NA	NA	ABC	ABC	NA	AAB	check	ABC	A	ABC	AAB	ABC	AAB	AAB	AAB	ABC	A	A	ABB	NA	3	3	0	5	1	6	12	19	1	Triploid
2022-PLATE-77_2022-1458_160-3N_Fam8_20	Fam08	9500 PSI	NA	NA	ABC	NA	NA	AAB	ABB	ABB	ABC	ABB	A	ABC	A	AAB	AAB	ABC	A	A	AAB	NA	4	4	0	4	3	4	11	19	1	Triploid
2022-PLATE-77_2022-1458_161-3N_Fam9_01	Fam09	9500 PSI	NA	NA	AAB	A	AAB	AAB	ABC	AAB	AAB	ABB	AAB	ABB	A	AAB	AAB	ABC	ABB	A	AAB	NA	2	3	0	9	3	2	14	19	1	Triploid
2022-PLATE-77_2022-1458_162-3N_Fam9_02	Fam09	9500 PSI	NA	NA	AAB	AAB	A	AAB	check	ABB	ABC	ABC	A	ABC	AAB	AAB	AAB	ABC	AAB	A	A	NA	2	4	0	7	1	4	12	19	1	Triploid
2022-PLATE-77_2022-1458_163-3N_Fam9_03	Fam09	9500 PSI	NA	NA	AAB	AAB	A	AAB	ABC	ABB	ABC	ABC	AAB	AAB	AAB	AAB	AAB	ABC	ABB	A	A	NA	2	3	0	8	2	4	14	19	1	Triploid
2022-PLATE-77_2022-1458_164-3N_Fam9_04	Fam09	9500 PSI	NA	NA	AAB	AAB	AAB	AAB	check	ABB	ABC	ABC	ABB	ABC	A	AAB	AAB	ABC	ABB	A	AAB	NA	2	2	0	7	3	4	14	19	1	Triploid
2022-PLATE-77_2022-1458_165-3N_Fam9_05	Fam09	9500 PSI	NA	NA	AAB	AAB	AAB	ABB	check	ABB	NA	ABC	AAB	ABC	AAB	AAB	AAB	ABC	AAB	A	AAB	NA	3	1	0	9	2	3	14	19	1	Triploid
2022-PLATE-77_2022-1458_166-3N_Fam9_06	Fam09	9500 PSI	NA	NA	AAB	AAB	A	NA	AAB	A	AB	AB	ABB	ABC	AAB	AAB	AAB	ABC	AAB	A	AAB	NA	3	3	2	8	1	2	11	19	0.846154	Aneuploid
2022-PLATE-77_2022-1458_167-3N_Fam9_07	Fam09	9500 PSI	NA	NA	AAB	AAB	AAB	AAB	check	ABC	ABC	ABB	AAB	ABB	AAB	AAB	AAB	ABC	AAB	A	A	NA	2	2	0	9	2	3	14	19	1	Triploid
2022-PLATE-77_2022-1458_168-3N_Fam9_08	Fam09	9500 PSI	NA	NA	AAB	A	AAB	ABB	check	ABB	ABC	ABC	AAB	ABC	A	AAB	AAB	ABC	ABB	A	A	NA	2	4	0	5	3	4	12	19	1	Triploid
2022-PLATE-77_2022-1458_169-3N_Fam9_09	Fam09	9500 PSI	NA	NA	AAB	A	A	AAB	check	AAB	ABB	ABB	AAB	ABC	A	AAB	AAB	ABC	A	A	AAB	NA	2	5	0	7	2	2	11	19	1	Triploid
2022-PLATE-77_2022-1458_170-3N_Fam9_10	Fam09	9500 PSI	NA	NA	AAB	AAB	A	ABB	ABB	ABB	ABC	ABC	AAB	AAB	A	AAB	AAB	ABC	ABB	A	A	NA	2	4	0	6	4	3	13	19	1	Triploid
2022-PLATE-77_2022-1458_171-3N_Fam9_11	Fam09	9500 PSI	NA	NA	AAB	A	A	ABB	check	AAB	NA	ABB	AAB	ABC	AAB	AAB	AAB	ABC	AAB	A	AAB	NA	3	3	0	8	2	2	12	19	1	Triploid
2022-PLATE-77_2022-1458_172-3N_Fam9_12	Fam09	9500 PSI	NA	NA	AAB	AAB	A	ABB	AAB	ABB	ABC	ABC	ABB	ABC	AAB	AAB	AAB	ABC	AAB	A	AAB	NA	2	2	0	8	3	4	15	19	1	Triploid
2022-PLATE-77_2022-1458_173-3N_Fam9_13	Fam09	9500 PSI	NA	NA	AAB	A	A	ABB	check	ABB	ABC	ABC	ABB	AAB	AAB	AAB	AAB	ABC	A	A	AAB	NA	2	4	0	6	3	3	12	19	1	Triploid
2022-PLATE-77_2022-1458_174-3N_Fam9_14	Fam09	9500 PSI	NA	NA	AAB	A	AAB	check	ABB	ABC	ABC	ABB	ABB	ABC	AAB	AAB	AAB	ABC	A	A	A	NA	2	4	0	5	3	4	12	19	1	Triploid
2022-PLATE-77_2022-1458_175-3N_Fam9_15	Fam09	9500 PSI	NA	NA	AAB	AAB	AAB	AAB	ABC	AAB	ABB	ABC	ABB	ABB	A	AAB	AAB	ABC	ABB	A	AAB	NA	2	2	0	8	4	3	15	19	1	Triploid
2022-PLATE-77_2022-1458_176-3N_Fam9_16	Fam09	9500 PSI	NA	NA	AAB	AAB	A	ABB	ABC	ABB	ABC	ABC	ABB	ABC	A	AAB	AAB	ABC	AAB	A	AAB	NA	2	3	0	6	3	5	14	19	1	Triploid
2022-PLATE-77_2022-1458_177-3N_Fam9_17	Fam09	9500 PSI	NA	NA	ABB	NA	A	ABB	check	ABC	ABC	ABB	AAB	ABC	AAB	AAB	AAB	ABC	A	A	A	NA	3	4	0	4	3	4	11	19	1	Triploid
2022-PLATE-77_2022-1458_178-3N_Fam9_18	Fam09	9500 PSI	NA	NA	AAB	A	A	ABB	ABC	A	AAB	ABC	ABB	ABB	A	AAB	AAB	ABC	AAB	A	AAB	NA	2	5	0	6	3	3	12	19	1	Triploid
2022-PLATE-77_2022-1458_179-3N_Fam9_19	Fam09	9500 PSI	NA	NA	AAB	AAB	AAB	AAB	ABC	A	NA	ABC	AAB	ABC	AAB	AAB	AAB	ABC	ABB	A	A	NA	3	3	0	8	1	4	13	19	1	Triploid
2022-PLATE-77_2022-1458_180-3N_Fam9_20	Fam09	9500 PSI	NA	NA	AAB	A	AAB	AAB	ABC	ABB	ABC	ABC	AAB	ABC	AAB	AAB	AAB	ABC	AAB	A	AAB	NA	2	2	0	9	1	5	15	19	1	Triploid
2022-PLATE-77_2022-1458_181-3N_Fam10_01	Fam10	9500 PSI	NA	NA	AAB	ABC	A	AAB	check	ABB	ABB	ABB	ABC	ABC	A	ABB	ABB	ABC	ABC	A	AAB	NA	2	3	0	3	5	5	13	19	1	Triploid
2022-PLATE-77_2022-1458_182-3N_Fam10_02	Fam10	9500 PSI	NA	NA	AAB	ABC	AAB	NA	ABC	AAB	ABC	ABB	AAB	ABC	AAB	A	A	ABC	ABC	AAB	AAB	NA	3	2	0	7	1	6	14	19	1	Triploid
2022-PLATE-77_2022-1458_183-3N_Fam10_03	Fam10	9500 PSI	NA	NA	AAB	ABC	AAB	ABC	ABC	ABC	ABB	AAB	ABC	ABC	A	ABB	AAB	ABC	ABB	ABB	A	NA	2	2	0	4	4	7	15	19	1	Triploid
2022-PLATE-77_2022-1458_184-3N_Fam10_04	Fam10	9500 PSI	NA	NA	AAB	ABC	ABB	NA	AB	AAB	ABB	ABB	ABC	AAB	AAB	ABB	ABC	ABC	ABB	AAB	AAB	NA	3	0	1	6	5	4	15	19	0.9375	Aneuploid
2022-PLATE-77_2022-1458_185-3N_Fam10_05	Fam10	9500 PSI	NA	NA	AAB	ABC	ABB	ABB	ABC	AAB	ABB	ABB	ABB	AAB	A	ABB	ABB	ABC	ABC	A	AAB	NA	2	2	0	4	7	4	15	19	1	Triploid
2022-PLATE-77_2022-1458_186-3N_Fam10_06	Fam10	9500 PSI	NA	NA	AAB	ABC	A	NA	check	ABC	AAB	AAB	ABB	ABC	AAB	ABB	ABC	ABC	ABB	ABB	A	NA	3	2	0	4	4	5	13	19	1	Triploid
2022-PLATE-77_2022-1458_187-3N_Fam10_07	Fam10	9500 PSI	NA	NA	AAB	ABC	AAB	NA	check	AAB	ABB	ABB	ABB	ABC	AAB	A	AAB	ABC	ABB	AAB	A	NA	3	2	0	6	4	3	13	19	1	Triploid
2022-PLATE-77_2022-1458_188-3N_Fam10_08	Fam10	9500 PSI	NA	NA	AAB	ABC	A	NA	ABC	AAB	ABC	ABB	ABB	AAB	A	ABB	ABB	ABC	ABC	ABB	A	NA	3	3	0	3	5	5	13	19	1	Triploid
2022-PLATE-77_2022-1458_189-3N_Fam10_09	Fam10	9500 PSI	NA	NA	AAB	ABC	A	NA	ABC	ABB	ABB	ABB	ABC	ABB	A	A	ABB	ABC	ABC	A	AAB	NA	3	4	0	2	5	5	12	19	1	Triploid
2022-PLATE-77_2022-1458_190-3N_Fam10_10	Fam10	9500 PSI	NA	NA	AAB	ABB	AAB	NA	ABC	A	ABB	ABB	ABB	ABC	AAB	ABB	A	ABC	ABC	A	A	NA	3	4	0	3	5	4	12	19	1	Triploid
2022-PLATE-77_2022-1458_191-3N_Fam10_11	Fam10	9500 PSI	NA	NA	AAB	ABC	A	ABB	check	A	ABB	ABB	ABB	AAB	A	AAB	A	ABC	AAB	AAB	AAB	NA	2	4	0	6	4	2	12	19	1	Triploid
2022-PLATE-77_2022-1458_192-3N_Fam10_12	Fam10	9500 PSI	NA	NA	AAB	ABC	ABB	NA	AAB	ABC	ABB	AAB	ABB	AAB	AAB	ABB	AAB	ABC	AAB	ABB	A	NA	3	1	0	7	5	3	15	19	1	Triploid
2022-PLATE-77_2022-1458_193-3N_Fam10_13	Fam10	9500 PSI	NA	NA	AAB	ABC	AAB	ABC	check	AAB	ABC	ABB	ABC	ABC	A	ABB	ABB	ABC	ABC	AAB	AAB	NA	2	1	0	5	3	7	15	19	1	Triploid
2022-PLATE-77_2022-1458_194-3N_Fam10_14	Fam10	9500 PSI	NA	NA	ABB	ABC	A	NA	ABC	AAB	ABC	ABB	ABB	A	check	ABB	ABB	ABC	ABC	AAB	AAB	NA	3	2	0	3	5	5	13	19	1	Triploid
2022-PLATE-77_2022-1458_195-3N_Fam10_15	Fam10	9500 PSI	NA	NA	AAB	ABC	A	ABC	check	ABC	ABB	AAB	ABC	AAB	AAB	A	AAB	ABC	ABC	AAB	A	NA	2	3	0	6	1	6	13	19	1	Triploid
2022-PLATE-77_2022-1458_196-3N_Fam10_16	Fam10	9500 PSI	NA	NA	AAB	ABC	A	ABC	check	A	ABB	ABB	ABB	AAB	AAB	ABB	A	ABC	ABC	A	A	NA	2	5	0	3	4	4	11	19	1	Triploid
2022-PLATE-77_2022-1458_197-3N_Fam10_17	Fam10	9500 PSI	NA	NA	AAB	ABC	AAB	NA	AAB	AAB	ABC	ABB	ABC	ABC	A	A	A	ABC	AAB	AAB	AAB	NA	3	3	0	7	1	5	13	19	1	Triploid
2022-PLATE-77_2022-1458_198-3N_Fam10_18	Fam10	9500 PSI	NA	NA	AAB	ABC	ABB	NA	ABB	ABC	ABB	AAB	ABC	AAB	A	A	ABC	ABC	ABB	A	AAB	NA	3	3	0	4	4	5	13	19	1	Triploid
2022-PLATE-77_2022-1458_199-3N_Fam10_19	Fam10	9500 PSI	NA	NA	AAB	ABB	AAB	NA	ABC	ABC	ABC	AAB	ABB	ABC	A	ABB	ABC	ABC	ABB	ABB	A	NA	3	2	0	3	5	6	14	19	1	Triploid
2022-PLATE-77_2022-1458_200-3N_Fam10_20	Fam10	9500 PSI	NA	NA	AAB	ABC	AAB	AAB	check	AAB	ABB	AAB	ABB	ABB	AAB	ABB	ABB	ABC	ABC	AAB	A	NA	2	1	0	7	5	3	15	19	1	Triploid
2022-PLATE-77_2022-1458_201-3N_Fam11_01	Fam11	9500 PSI	NA	NA	AAB	ABC	A	ABB	AB	ABB	AAB	ABC	A	ABC	AAB	A	AAB	ABC	AAB	A	AAB	NA	2	4	1	6	2	4	12	19	0.923077	Aneuploid
2022-PLATE-77_2022-1458_202-3N_Fam11_02	Fam11	9500 PSI	NA	NA	AAB	ABC	A	AAB	ABB	AAB	A	ABC	A	ABC	AAB	AAB	AAB	ABC	AAB	A	A	NA	2	5	0	7	1	4	12	19	1	Triploid
2022-PLATE-77_2022-1458_203-3N_Fam11_03	Fam11	9500 PSI	NA	NA	AAB	ABC	AAB	AAB	ABB	AAB	A	ABC	A	AAB	A	AAB	AAB	ABC	ABB	A	A	bp shift	2	5	0	7	2	3	12	19	1	Triploid
2022-PLATE-77_2022-1458_204-3N_Fam11_04	Fam11	9500 PSI	NA	NA	AAB	ABC	AAB	NA	ABB	ABB	A	ABC	AAB	AAB	AAB	AAB	AAB	ABC	ABB	A	AAB	NA	3	2	0	8	3	3	14	19	1	Triploid
2022-PLATE-77_2022-1458_205-3N_Fam11_05	Fam11	9500 PSI	NA	NA	AAB	ABC	A	NA	ABB	A	ABB	ABC	AAB	ABC	A	A	AAB	ABC	AAB	A	AAB	NA	3	5	0	5	2	4	11	19	1	Triploid
2022-PLATE-77_2022-1458_206-3N_Fam11_06	Fam11	9500 PSI	NA	NA	AAB	ABC	NA	AAB	check	ABB	ABB	ABC	A	ABC	A	AAB	AAB	ABC	ABB	A	AAB	NA	3	3	0	5	3	4	12	19	1	Triploid
2022-PLATE-77_2022-1458_207-3N_Fam11_07	Fam11	9500 PSI	NA	NA	AAB	ABC	A	NA	ABB	AAB	AAB	ABC	A	ABC	AAB	ABB	AAB	ABC	ABB	A	A	NA	3	4	0	5	3	4	12	19	1	Triploid
2022-PLATE-77_2022-1458_208-3N_Fam11_08	Fam11	9500 PSI	NA	NA	AAB	AAB	A	AAB	ABB	AAB	ABB	ABC	AAB	ABC	AAB	AAB	AAB	ABC	ABB	A	AAB	NA	2	2	0	9	3	3	15	19	1	Triploid
2022-PLATE-77_2022-1458_209-3N_Fam11_09	Fam11	9500 PSI	NA	NA	AAB	ABC	AAB	NA	ABB	ABB	A	ABC	AAB	AAB	AAB	AAB	AAB	ABC	A	A	AAB	NA	3	3	0	8	2	3	13	19	1	Triploid
2022-PLATE-77_2022-1458_210-3N_Fam11_10	Fam11	9500 PSI	NA	NA	AAB	ABC	AAB	NA	ABB	AAB	ABB	ABC	A	ABB	A	AAB	AAB	ABC	ABB	A	AAB	NA	3	3	0	6	4	3	13	19	1	Triploid
2022-PLATE-77_2022-1458_211-3N_Fam11_11	Fam11	9500 PSI	NA	NA	AAB	ABC	AAB	ABB	check	ABB	AAB	ABC	AAB	AAB	A	AAB	AAB	ABC	A	A	AAB	NA	2	3	0	8	2	3	13	19	1	Triploid
2022-PLATE-77_2022-1458_212-3N_Fam11_12	Fam11	9500 PSI	NA	NA	AAB	ABC	AAB	NA	ABB	AAB	AAB	ABC	AAB	AAB	A	AAB	AAB	ABC	AAB	A	A	NA	3	3	0	9	1	3	13	19	1	Triploid
2022-PLATE-77_2022-1458_213-3N_Fam11_13	Fam11	9500 PSI	NA	NA	AAB	ABC	AAB	AAB	ABB	ABB	ABB	ABC	AAB	AAB	A	ABB	AAB	ABC	AAB	A	AAB	NA	2	2	0	8	4	3	15	19	1	Triploid
2022-PLATE-77_2022-1458_214-3N_Fam11_14	Fam11	9500 PSI	NA	NA	AAB	ABC	AAB	ABB	AB	AAB	ABB	ABC	A	AAB	A	AAB	AAB	ABC	AAB	A	AAB	NA	2	3	1	8	2	3	13	19	0.928571	Aneuploid
2022-PLATE-77_2022-1458_215-3N_Fam11_15	Fam11	9500 PSI	NA	NA	AAB	ABC	NA	ABB	AB	ABB	ABB	ABC	AAB	ABC	AAB	AAB	AAB	ABC	AAB	A	A	NA	3	2	1	6	3	4	13	19	0.928571	Aneuploid
2022-PLATE-77_2022-1458_216-3N_Fam11_16	Fam11	9500 PSI	NA	NA	AAB	NA	NA	ABB	AB	ABB	ABB	ABC	A	AAB	A	A	AAB	ABC	AAB	A	A	NA	4	5	1	4	3	2	9	19	0.9	Aneuploid
2022-PLATE-77_2022-1458_217-3N_Fam11_17	Fam11	9500 PSI	NA	NA	AAB	ABC	A	NA	ABB	AAB	AAB	ABC	A	ABC	AAB	AAB	AAB	ABC	AAB	A	A	NA	3	4	0	7	1	4	12	19	1	Triploid
2022-PLATE-77_2022-1458_218-3N_Fam11_18	Fam11	9500 PSI	NA	NA	AAB	ABC	A	NA	ABB	ABB	ABB	ABC	AAB	ABC	AAB	AAB	AAB	ABC	A	A	A	NA	3	4	0	5	3	4	12	19	1	Triploid
2022-PLATE-77_2022-1458_219-3N_Fam11_19	Fam11	9500 PSI	NA	NA	AAB	ABC	A	AAB	ABB	A	AAB	AAB	A	ABC	AAB	AAB	AAB	ABC	ABB	A	AAB	NA	2	4	0	8	2	3	13	19	1	Triploid
2022-PLATE-77_2022-1458_220-3N_Fam11_20	Fam11	9500 PSI	NA	NA	AAB	ABC	AAB	AAB	AB	AAB	A	ABC	A	AAB	A	AB	AAB	ABC	AAB	A	AAB	NA	2	4	2	8	0	3	11	19	0.846154	Aneuploid
2022-PLATE-77_2022-1458_221-3N_Fam12_01	Fam12	9500 PSI	NA	NA	A	ABC	ABB	NA	ABB	AAB	ABB	ABC	ABC	ABC	A	ABC	ABB	ABC	ABB	AAB	AAB	NA	3	2	0	3	5	6	14	19	1	Triploid
2022-PLATE-77_2022-1458_222-3N_Fam12_02	Fam12	9500 PSI	NA	NA	A	ABC	A	NA	ABB	NA	AAB	ABC	NA	AB	AAB	ABC	AAB	ABC	A	AAB	A	NA	5	4	1	4	1	4	9	19	0.9	Aneuploid
2022-PLATE-77_2022-1458_223-3N_Fam12_03	Fam12	9500 PSI	NA	NA	A	AB	A	NA	ABB	AB	A	AB	A	A	A	AB	AB	AB	A	AB	A	NA	3	8	7	0	1	0	1	19	0.125	Aneuploid
2022-PLATE-77_2022-1458_224-3N_Fam12_04	Fam12	9500 PSI	NA	NA	A	ABC	A	NA	ABB	ABB	AAB	ABC	ABC	AAB	AAB	ABC	AAB	ABC	ABB	ABB	A	NA	3	3	0	4	4	5	13	19	1	Triploid
2022-PLATE-77_2022-1458_225-3N_Fam12_05	Fam12	9500 PSI	NA	NA	A	ABC	A	NA	AB	AAB	AAB	AAB	AAB	AAB	A	ABC	AAB	ABC	AAB	AAB	AAB	NA	3	3	1	9	0	3	12	19	0.923077	Aneuploid
2022-PLATE-77_2022-1458_226-3N_Fam12_06	Fam12	9500 PSI	NA	NA	A	ABC	A	NA	AAB	AAB	AAB	ABC	ABC	AAB	A	ABC	ABB	ABC	ABB	ABB	AAB	NA	3	3	0	5	3	5	13	19	1	Triploid
2022-PLATE-77_2022-1458_227-3N_Fam12_07	Fam12	9500 PSI	NA	NA	A	AB	ABB	NA	ABB	AB	A	AB	ABC	ABC	AAB	AB	ABC	AB	AAB	A	AAB	NA	3	3	5	3	2	3	8	19	0.615385	Aneuploid
2022-PLATE-77_2022-1458_228-3N_Fam12_08	Fam12	9500 PSI	NA	NA	A	AB	A	NA	A	NA	AAB	ABC	ABC	AB	A	AB	A	AB	A	A	A	bp shift	4	8	4	1	0	2	3	19	0.428571	Aneuploid
2022-PLATE-77_2022-1458_229-3N_Fam12_09	Fam12	9500 PSI	NA	NA	A	ABC	A	NA	AAB	AAB	A	ABC	A	AAB	AAB	ABC	ABB	ABC	ABB	AAB	A	NA	3	5	0	5	2	4	11	19	1	Triploid
2022-PLATE-77_2022-1458_230-3N_Fam12_10	Fam12	9500 PSI	NA	NA	A	ABC	A	NA	AAB	ABB	AAB	ABC	ABC	A	A	ABC	A	ABC	A	AAB	A	NA	3	7	0	3	1	5	9	19	1	Triploid
2022-PLATE-78_2022-1458_231-3N_Fam12_11	Fam12	9500 PSI	AAB	A	A	ABC	A	ABC	ABB	AAB	AAB	ABC	AAB	AAB	A	ABC	AAB	ABC	ABB	AAB	A	NA	0	5	0	7	2	5	14	19	1	Triploid
2022-PLATE-78_2022-1458_232-3N_Fam12_12	Fam12	9500 PSI	ABB	A	NA	ABC	A	ABC	ABB	AAB	ABB	ABC	AAB	AAB	AAB	ABB	ABB	ABC	ABB	AAB	AAB	NA	1	2	0	6	6	4	16	19	1	Triploid
2022-PLATE-78_2022-1458_233-3N_Fam12_13	Fam12	9500 PSI	ABB	A	NA	AAB	ABB	ABC	ABB	AAB	ABB	ABC	ABC	ABC	AAB	ABC	AAB	ABC	AAB	ABB	AAB	NA	1	1	0	6	5	6	17	19	1	Triploid
2022-PLATE-78_2022-1458_234-3N_Fam12_14	Fam12	9500 PSI	AAB	ABB	NA	ABC	A	ABC	AAB	AAB	A	ABC	AAB	AAB	A	AAB	AAB	ABC	ABB	AAB	AAB	NA	1	3	0	9	2	4	15	19	1	Triploid
2022-PLATE-78_2022-1458_235-3N_Fam12_15	Fam12	9500 PSI	ABB	ABB	A	ABC	A	ABC	ABB	ABB	AAB	ABC	AAB	AAB	AAB	ABC	ABB	ABC	ABB	AAB	A	NA	0	3	0	5	6	5	16	19	1	Triploid
2022-PLATE-78_2022-1458_236-3N_Fam12_16	Fam12	9500 PSI	AAB	AB	A	ABC	ABB	AB	ABB	AAB	A	ABC	AAB	ABC	A	ABC	A	ABC	ABB	AAB	A	NA	0	5	2	4	3	5	12	19	0.857143	Aneuploid
2022-PLATE-78_2022-1458_237-3N_Fam12_17	Fam12	9500 PSI	ABB	A	A	ABC	A	ABC	ABB	ABB	AAB	ABC	ABC	AAB	A	ABC	ABC	ABC	AAB	AAB	AAB	NA	0	4	0	5	3	7	15	19	1	Triploid
2022-PLATE-78_2022-1458_238-3N_Fam12_18	Fam12	9500 PSI	AB	ABB	A	AB	ABB	NA	A	ABB	A	ABC	AB	NA	A	NA	NA	NA	A	NA	AAB	NA	6	5	3	1	3	1	5	19	0.625	Aneuploid
2022-PLATE-78_2022-1458_239-3N_Fam12_19	Fam12	9500 PSI	AAB	ABB	NA	ABC	A	ABC	AB	AB	A	AB	ABC	AAB	AAB	ABC	A	ABC	AB	AB	AB	NA	1	3	6	3	1	5	9	19	0.6	Aneuploid
2022-PLATE-78_2022-1458_240-3N_Fam12_20	Fam12	9500 PSI	ABB	ABB	NA	ABC	A	AB	AB	AB	AB	AB	A	AB	AAB	ABB	AB	ABC	AB	AB	AAB	NA	1	2	9	2	3	2	7	19	0.4375	Aneuploid

## Sheet: Experiment 2_parr
Sample_Name	family	treatment	SSsp2210_genotype	SsaD157_genotype	Sp1605_genotype	Sp2216_genotype	Ssa14_genotype	Ssa197_genotype	SsaF43_genotype	SsOsl85_genotype	EST107_genotype	EST19_genotype	EST28_genotype	EST68_genotype	Sleel53_genotype	Sleen82_genotype	SsOSL25_genotype	SsSP2215_genotype	Ssa407_genotype	Ssa412_genotype	Ssleer15.1_genotype	Aberration	replicate	count_NA	count_A	count_AB	count_AAB	count_ABB	count_ABC	count_trisomic	sum	prop.trisomic	ploidy
2022-PLATE-175_2022-2183_10-Ploidy_2N_R1_010	Fam07	0 PSI	AB	AB	AB	AB	AB	AB	AB	AB	AB	A	AB	A	A	AB	AB	AB	AB	A	AB	bp shift	2N.R1	0	4	15	0	0	0	0	19	0	Diploid
2022-PLATE-175_2022-2183_11-Ploidy_2N_R1_011	Fam05	0 PSI	A	AB	A	AB	AB	AB	A	AB	A	AB	AB	AB	A	AB	AB	AB	AB	A	AB	NA	2N.R1	0	6	13	0	0	0	0	19	0	Diploid
2022-PLATE-175_2022-2183_12-Ploidy_2N_R1_012	Fam04	0 PSI	AB	A	AB	AB	A	AB	AB	A	AB	AB	A	AB	AB	AB	AB	AB	AB	AB	A	NA	2N.R1	0	5	14	0	0	0	0	19	0	Diploid
2022-PLATE-175_2022-2183_13-Ploidy_2N_R1_013	Fam10	0 PSI	A	AB	A	AB	AB	AB	AB	A	AB	AB	AB	AB	AB	AB	A	AB	AB	AB	AB	NA	2N.R1	0	4	15	0	0	0	0	19	0	Diploid
2022-PLATE-175_2022-2183_14-Ploidy_2N_R1_014	Fam02	0 PSI	AB	AB	A	AB	AB	AB	A	AB	AB	AB	AB	AB	AB	A	AB	AB	A	A	AB	NA	2N.R1	0	5	14	0	0	0	0	19	0	Diploid
2022-PLATE-175_2022-2183_15-Ploidy_2N_R1_015	Fam02	0 PSI	AB	AB	NA	AB	AB	AB	A	A	A	AB	AB	AB	AB	A	AB	AB	AB	AB	AB	NA	2N.R1	1	4	14	0	0	0	0	19	0	Diploid
2022-PLATE-175_2022-2183_16-Ploidy_2N_R1_016	Fam04	0 PSI	A	A	NA	AB	AB	AB	AB	AB	AB	AB	AB	AB	AB	AB	AB	AB	AB	AB	A	NA	2N.R1	1	3	15	0	0	0	0	19	0	Diploid
2022-PLATE-175_2022-2183_17-Ploidy_2N_R1_017	Fam12	0 PSI	A	A	A	AB	AB	AB	A	AB	AB	AB	A	AB	A	AB	AB	AB	A	AB	A	NA	2N.R1	0	8	11	0	0	0	0	19	0	Diploid
2022-PLATE-175_2022-2183_18-Ploidy_2N_R1_018	Fam02	0 PSI	AB	AB	A	AB	AB	AB	A	AB	A	A	AB	AB	AB	AB	AB	AB	AB	A	AB	NA	2N.R1	0	5	14	0	0	0	0	19	0	Diploid
2022-PLATE-175_2022-2183_19-Ploidy_2N_R1_019	Fam09	0 PSI	AB	AB	A	A	AB	AB	AB	AB	AB	AB	AB	AB	A	AB	AB	AB	A	A	AB	NA	2N.R1	0	5	14	0	0	0	0	19	0	Diploid
2022-PLATE-175_2022-2183_1-Ploidy_2N_R1_001	Fam03	0 PSI	AB	AB	AB	AB	AB	NA	AB	AB	AB	AB	AB	AB	AB	AB	A	AB	AB	AB	A	NA	2N.R1	1	2	16	0	0	0	0	19	0	Diploid
2022-PLATE-175_2022-2183_20-Ploidy_2N_R1_020	Fam06	0 PSI	AB	AB	A	AB	AB	AB	A	AB	AB	AB	A	A	A	AB	AB	AB	AB	A	AB	NA	2N.R1	0	6	13	0	0	0	0	19	0	Diploid
2022-PLATE-175_2022-2183_21-Ploidy_2N_R1_021	Fam05	0 PSI	A	AB	A	AB	A	AB	A	AB	AB	AB	AB	AB	AB	AB	AB	AB	A	A	AB	NA	2N.R1	0	6	13	0	0	0	0	19	0	Diploid
2022-PLATE-175_2022-2183_22-Ploidy_2N_R1_022	Fam12	0 PSI	A	AB	A	AB	AB	AB	A	AB	AB	AB	AB	AB	A	AB	ABB	AB	A	AB	A	2 paternal	2N.R1	0	6	12	0	1	0	1	19	0.0769231	Aneuploid
2022-PLATE-175_2022-2183_23-Ploidy_2N_R1_023	Fam04	0 PSI	AB	AB	A	AB	A	AB	AB	AB	AB	AB	A	AB	A	AB	AB	AB	AB	AB	AB	NA	2N.R1	0	4	15	0	0	0	0	19	0	Diploid
2022-PLATE-175_2022-2183_24-Ploidy_2N_R1_024	Fam01	0 PSI	AB	AB	AB	A	AB	AB	A	AB	AB	A	AB	AB	A	AB	AB	AB	AB	A	A	NA	2N.R1	0	6	13	0	0	0	0	19	0	Diploid
2022-PLATE-175_2022-2183_25-Ploidy_2N_R1_025	Fam02	0 PSI	AB	AB	A	AB	A	AB	AB	AB	AB	AB	AB	AB	A	A	AB	AB	A	AB	A	NA	2N.R1	0	6	13	0	0	0	0	19	0	Diploid
2022-PLATE-175_2022-2183_26-Ploidy_2N_R1_026	Fam10	0 PSI	AB	AB	AB	AB	A	AB	AB	AB	AB	AB	AB	AB	A	A	AB	AB	AB	AB	AB	NA	2N.R1	0	3	16	0	0	0	0	19	0	Diploid
2022-PLATE-175_2022-2183_27-Ploidy_2N_R1_027	Fam05	0 PSI	AB	AB	NA	AB	A	AB	AB	AB	A	AB	A	AB	A	AB	AB	AB	AB	A	A	NA	2N.R1	1	6	12	0	0	0	0	19	0	Diploid
2022-PLATE-175_2022-2183_28-Ploidy_2N_R1_028	Fam08	0 PSI	A	AB	AB	AB	AB	AB	AB	AB	AB	AB	A	AB	AB	A	AB	AB	AB	A	AB	NA	2N.R1	0	4	15	0	0	0	0	19	0	Diploid
2022-PLATE-175_2022-2183_29-Ploidy_2N_R1_029	Fam02	0 PSI	AB	AB	A	AB	A	AB	A	AB	AB	AB	AB	A	AB	AB	AB	AB	A	AB	AB	NA	2N.R1	0	5	14	0	0	0	0	19	0	Diploid
2022-PLATE-175_2022-2183_2-Ploidy_2N_R1_002	Fam01	0 PSI	AB	AB	AB	A	AB	AB	AB	AB	AB	AB	A	A	AB	AB	AB	AB	A	AB	A	NA	2N.R1	0	5	14	0	0	0	0	19	0	Diploid
2022-PLATE-175_2022-2183_30-Ploidy_2N_R1_030	Fam08	0 PSI	AB	AB	AB	AB	A	AB	AB	AB	AB	AB	AB	AB	A	A	AB	AB	A	A	AB	NA	2N.R1	0	5	14	0	0	0	0	19	0	Diploid
2022-PLATE-175_2022-2183_31-Ploidy_2N_R1_031	Fam07	0 PSI	AB	AB	AB	A	A	AB	AB	AB	A	A	A	AB	A	AB	A	AB	A	A	A	NA	2N.R1	0	10	9	0	0	0	0	19	0	Diploid
2022-PLATE-175_2022-2183_32-Ploidy_2N_R1_032	Fam11	0 PSI	AB	A	A	AB	AB	AB	AB	AB	A	AB	A	AB	A	AB	AB	AB	A	A	A	NA	2N.R1	0	8	11	0	0	0	0	19	0	Diploid
2022-PLATE-175_2022-2183_33-Ploidy_2N_R1_033	Fam05	0 PSI	A	AB	A	AB	A	AB	A	AB	A	AB	A	AB	AB	AB	AB	AB	AB	A	AB	NA	2N.R1	0	7	12	0	0	0	0	19	0	Diploid
2022-PLATE-175_2022-2183_34-Ploidy_2N_R1_034	Fam11	0 PSI	A	AB	AB	AB	A	AB	AB	AB	A	AB	A	AB	A	A	AB	AB	AB	A	A	NA	2N.R1	0	8	11	0	0	0	0	19	0	Diploid
2022-PLATE-175_2022-2183_35-Ploidy_2N_R1_035	Fam11	0 PSI	A	AB	A	AB	A	AB	AB	A	AB	AB	A	AB	A	AB	AB	AB	A	A	A	NA	2N.R1	0	9	10	0	0	0	0	19	0	Diploid
2022-PLATE-175_2022-2183_36-Ploidy_2N_R1_036	Fam11	0 PSI	AB	A	AB	AB	A	AB	AB	A	AB	AB	A	AB	A	A	AB	AB	A	A	AB	NA	2N.R1	0	8	11	0	0	0	0	19	0	Diploid
2022-PLATE-175_2022-2183_37-Ploidy_2N_R1_037	Fam02	0 PSI	AB	AB	NA	AB	A	AB	A	AB	AB	A	AB	A	A	A	AB	AB	AB	AB	A	NA	2N.R1	1	7	11	0	0	0	0	19	0	Diploid
2022-PLATE-175_2022-2183_38-Ploidy_2N_R1_038	Fam10	0 PSI	A	AB	A	AB	AB	AB	A	AB	AB	AB	A	AB	AB	A	AB	AB	A	A	AB	NA	2N.R1	0	7	12	0	0	0	0	19	0	Diploid
2022-PLATE-175_2022-2183_39-Ploidy_2N_R1_039	Fam07	0 PSI	AB	AB	AB	AB	AB	AB	AB	AB	AB	A	AB	AB	A	AB	A	AB	A	A	A	NA	2N.R1	0	6	13	0	0	0	0	19	0	Diploid
2022-PLATE-175_2022-2183_3-Ploidy_2N_R1_003	Fam05	0 PSI	A	AB	A	AB	A	AB	A	AB	AB	AB	AB	AB	AB	AB	AB	AB	AB	A	AB	NA	2N.R1	0	5	14	0	0	0	0	19	0	Diploid
2022-PLATE-175_2022-2183_40-Ploidy_2N_R1_040	Fam07	0 PSI	AB	AB	AB	AB	AB	AB	AB	AB	AB	AB	AB	AB	A	AB	AB	AB	A	A	A	NA	2N.R1	0	4	15	0	0	0	0	19	0	Diploid
2022-PLATE-175_2022-2183_41-Ploidy_2N_R1_041	Fam11	0 PSI	A	A	A	AB	AB	AB	AB	AB	AB	AB	A	AB	AB	AB	AB	AB	AB	A	AB	NA	2N.R1	0	5	14	0	0	0	0	19	0	Diploid
2022-PLATE-175_2022-2183_42-Ploidy_2N_R1_042	Fam07	0 PSI	A	AB	AB	AB	A	AB	AB	A	AB	AB	AB	AB	A	AB	AB	AB	A	A	A	NA	2N.R1	0	7	12	0	0	0	0	19	0	Diploid
2022-PLATE-175_2022-2183_43-Ploidy_2N_R1_043	Fam02	0 PSI	AB	AB	NA	AB	AB	AB	AB	AB	A	A	A	AB	AB	A	AB	AB	AB	AB	A	NA	2N.R1	1	5	13	0	0	0	0	19	0	Diploid
2022-PLATE-175_2022-2183_44-Ploidy_2N_R1_044	Fam02	0 PSI	AB	AB	A	AB	A	AB	A	AB	AB	AB	AB	AB	AB	A	AB	AB	AB	AB	AB	NA	2N.R1	0	4	15	0	0	0	0	19	0	Diploid
2022-PLATE-175_2022-2183_45-Ploidy_2N_R1_045	Fam07	0 PSI	AB	AB	AB	A	A	AB	AB	AB	A	A	AB	AB	AB	AB	A	AB	A	A	A	NA	2N.R1	0	8	11	0	0	0	0	19	0	Diploid
2022-PLATE-175_2022-2183_46-Ploidy_2N_R1_046	Fam03	0 PSI	AB	AB	AB	AB	A	AB	AB	AB	AB	AB	AB	A	A	AB	A	AB	AB	AB	A	NA	2N.R1	0	5	14	0	0	0	0	19	0	Diploid
2022-PLATE-175_2022-2183_47-Ploidy_2N_R1_047	Fam05	0 PSI	AB	AB	A	AB	A	AB	AB	AB	A	AB	AB	AB	A	AB	AB	AB	AB	A	A	NA	2N.R1	0	6	13	0	0	0	0	19	0	Diploid
2022-PLATE-175_2022-2183_48-Ploidy_2N_R1_048	Fam10	0 PSI	AB	AB	AB	AB	A	AB	AB	A	AB	AB	AB	AB	AB	A	AB	AB	AB	AB	AB	NA	2N.R1	0	3	16	0	0	0	0	19	0	Diploid
2022-PLATE-175_2022-2183_49-Ploidy_2N_R1_049	Fam06	0 PSI	A	A	NA	AB	A	AB	AB	A	AB	AB	A	A	A	AB	AB	AB	AB	A	A	NA	2N.R1	1	9	9	0	0	0	0	19	0	Diploid
2022-PLATE-175_2022-2183_4-Ploidy_2N_R1_004	Fam10	0 PSI	AB	AB	A	AB	A	AB	A	AB	A	AB	A	AB	AB	A	AB	AB	A	AB	AB	NA	2N.R1	0	7	12	0	0	0	0	19	0	Diploid
2022-PLATE-175_2022-2183_50-Ploidy_2N_R1_050	Fam02	0 PSI	AB	AB	A	AB	AB	AB	AB	AB	AB	A	AB	AB	AB	A	AB	AB	AB	AB	AB	NA	2N.R1	0	3	16	0	0	0	0	19	0	Diploid
2022-PLATE-175_2022-2183_51-Ploidy_2N_R1_051	Fam04	0 PSI	A	A	A	AB	AB	AB	AB	A	AB	AB	A	AB	A	AB	AB	A	A	A	A	NA	2N.R1	0	10	9	0	0	0	0	19	0	Diploid
2022-PLATE-175_2022-2183_52-Ploidy_2N_R1_052	Fam11	0 PSI	AB	A	A	AB	AB	AB	AB	A	AB	AB	AB	A	A	A	AB	AB	AB	A	AB	NA	2N.R1	0	7	12	0	0	0	0	19	0	Diploid
2022-PLATE-175_2022-2183_53-Ploidy_2N_R1_053	Fam11	0 PSI	A	AB	NA	AB	A	AB	AB	AB	A	AB	AB	AB	AB	AB	AB	AB	AB	A	A	NA	2N.R1	1	5	13	0	0	0	0	19	0	Diploid
2022-PLATE-175_2022-2183_54-Ploidy_2N_R1_054	Fam07	0 PSI	AB	AB	AB	A	A	AB	AB	A	A	AB	AB	A	AB	AB	A	AB	A	A	AB	NA	2N.R1	0	8	11	0	0	0	0	19	0	Diploid
2022-PLATE-175_2022-2183_55-Ploidy_2N_R1_055	Fam08	0 PSI	AB	AB	AB	AB	A	AB	AB	AB	AB	A	AB	AB	AB	AB	AB	AB	A	A	AB	NA	2N.R1	0	4	15	0	0	0	0	19	0	Diploid
2022-PLATE-175_2022-2183_56-Ploidy_2N_R1_056	Fam01	0 PSI	AB	A	NA	AB	AB	AB	AB	AB	AB	A	AB	AB	AB	AB	AB	AB	A	A	AB	NA	2N.R1	1	4	14	0	0	0	0	19	0	Diploid
2022-PLATE-175_2022-2183_57-Ploidy_2N_R1_057	Fam08	0 PSI	AB	AB	AB	AB	A	AB	AB	A	AB	A	AB	AB	A	AB	AB	AB	AB	A	AB	NA	2N.R1	0	5	14	0	0	0	0	19	0	Diploid
2022-PLATE-175_2022-2183_58-Ploidy_2N_R1_058	Fam07	0 PSI	AB	AB	AB	A	A	AB	AB	AB	AB	A	AB	AB	AB	AB	AB	AB	A	A	A	NA	2N.R1	0	6	13	0	0	0	0	19	0	Diploid
2022-PLATE-175_2022-2183_59-Ploidy_2N_R1_059	Fam07	0 PSI	AB	AB	AB	AB	AB	AB	AB	A	AB	AB	AB	A	AB	AB	AB	AB	AB	A	A	NA	2N.R1	0	4	15	0	0	0	0	19	0	Diploid
2022-PLATE-175_2022-2183_5-Ploidy_2N_R1_005	Fam11	0 PSI	A	AB	A	AB	A	NA	AB	A	AB	AB	AB	AB	A	A	AB	AB	A	A	A	NA	2N.R1	1	9	9	0	0	0	0	19	0	Diploid
2022-PLATE-175_2022-2183_60-Ploidy_2N_R1_060	Fam01	0 PSI	AB	AB	AB	AB	AB	AB	A	AB	A	AB	A	A	A	AB	A	AB	AB	AB	AB	NA	2N.R1	0	6	13	0	0	0	0	19	0	Diploid
2022-PLATE-175_2022-2183_61-Ploidy_2N_R1_061	Fam10	0 PSI	AB	AB	A	AB	AB	AB	AB	A	AB	AB	AB	A	A	A	A	AB	AB	A	AB	NA	2N.R1	0	7	12	0	0	0	0	19	0	Diploid
2022-PLATE-175_2022-2183_62-Ploidy_2N_R1_062	Fam11	0 PSI	A	AB	AB	AB	A	AB	AB	AB	A	AB	A	AB	AB	AB	AB	AB	A	A	A	NA	2N.R1	0	7	12	0	0	0	0	19	0	Diploid
2022-PLATE-175_2022-2183_63-Ploidy_2N_R1_063	Fam09	0 PSI	A	AB	A	AB	AB	AB	AB	AB	AB	AB	AB	AB	A	AB	AB	AB	AB	A	AB	NA	2N.R1	0	4	15	0	0	0	0	19	0	Diploid
2022-PLATE-175_2022-2183_64-Ploidy_2N_R1_064	Fam08	0 PSI	A	AB	AB	AB	A	A	AB	AB	AB	AB	A	AB	AB	AB	AB	AB	A	A	AB	NA	2N.R1	0	6	13	0	0	0	0	19	0	Diploid
2022-PLATE-175_2022-2183_65-Ploidy_2N_R1_065	Fam05	0 PSI	AB	AB	NA	AB	AB	AB	AB	AB	AB	AB	AB	AB	A	AB	AB	AB	AB	A	AB	NA	2N.R1	1	2	16	0	0	0	0	19	0	Diploid
2022-PLATE-175_2022-2183_66-Ploidy_2N_R1_066	Fam06	0 PSI	AB	A	AB	AB	AB	AB	A	AB	AB	AB	AB	AB	AB	AB	AB	AB	AB	A	A	NA	2N.R1	0	4	15	0	0	0	0	19	0	Diploid
2022-PLATE-175_2022-2183_67-Ploidy_2N_R1_067	Fam07	0 PSI	AB	AB	AB	A	AB	AB	AB	AB	AB	AB	AB	AB	A	AB	AB	AB	AB	A	AB	NA	2N.R1	0	3	16	0	0	0	0	19	0	Diploid
2022-PLATE-175_2022-2183_68-Ploidy_2N_R1_068	Fam02	0 PSI	AB	AB	A	AB	AB	AB	AB	A	AB	AB	AB	AB	A	AB	AB	AB	AB	A	AB	NA	2N.R1	0	4	15	0	0	0	0	19	0	Diploid
2022-PLATE-175_2022-2183_69-Ploidy_2N_R1_069	Fam03	0 PSI	AB	AB	AB	AB	A	AB	A	AB	A	AB	AB	AB	AB	AB	AB	AB	A	AB	AB	NA	2N.R1	0	4	15	0	0	0	0	19	0	Diploid
2022-PLATE-175_2022-2183_6-Ploidy_2N_R1_006	Fam06	0 PSI	A	AB	AB	AB	A	AB	A	AB	A	AB	A	A	A	AB	AB	AB	AB	A	AB	NA	2N.R1	0	8	11	0	0	0	0	19	0	Diploid
2022-PLATE-175_2022-2183_70-Ploidy_2N_R1_070	Fam01	0 PSI	AB	A	AB	AB	A	AB	A	AB	A	AB	AB	AB	A	AB	A	AB	AB	A	A	NA	2N.R1	0	8	11	0	0	0	0	19	0	Diploid
2022-PLATE-175_2022-2183_71-Ploidy_2N_R1_071	Fam06	0 PSI	AB	AB	AB	AB	AB	AB	A	AB	AB	AB	A	AB	A	AB	AB	AB	AB	A	A	NA	2N.R1	0	5	14	0	0	0	0	19	0	Diploid
2022-PLATE-175_2022-2183_72-Ploidy_2N_R1_072	Fam07	0 PSI	AB	AB	AB	AB	A	AB	AB	AB	AB	A	AB	AB	A	AB	AB	AB	A	A	A	NA	2N.R1	0	6	13	0	0	0	0	19	0	Diploid
2022-PLATE-175_2022-2183_73-Ploidy_2N_R1_073	Fam06	0 PSI	A	AB	A	AB	AB	AB	AB	A	AB	AB	AB	A	AB	AB	AB	AB	AB	A	A	NA	2N.R1	0	6	13	0	0	0	0	19	0	Diploid
2022-PLATE-175_2022-2183_74-Ploidy_2N_R1_074	Fam11	0 PSI	AB	A	AB	AB	AB	AB	AB	AB	A	AB	AB	AB	A	A	AB	AB	A	A	A	NA	2N.R1	0	7	12	0	0	0	0	19	0	Diploid
2022-PLATE-175_2022-2183_75-Ploidy_2N_R1_075	Fam08	0 PSI	AB	AB	AB	AB	AB	AB	AB	AB	AB	A	AB	A	AB	A	AB	AB	A	A	A	NA	2N.R1	0	6	13	0	0	0	0	19	0	Diploid
2022-PLATE-175_2022-2183_76-Ploidy_2N_R1_076	Fam04	0 PSI	AB	AB	AB	AB	AB	AB	AB	A	AB	AB	AB	A	AB	AB	AB	A	AB	A	AB	NA	2N.R1	0	4	15	0	0	0	0	19	0	Diploid
2022-PLATE-175_2022-2183_77-Ploidy_2N_R1_077	Fam09	0 PSI	AB	A	NA	AB	A	AB	A	AB	AB	AB	AB	AB	A	AB	AB	AB	A	A	AB	NA	2N.R1	1	6	12	0	0	0	0	19	0	Diploid
2022-PLATE-175_2022-2183_78-Ploidy_2N_R1_078	Fam09	0 PSI	A	AB	AB	A	AB	AB	AB	AB	AB	AB	A	AB	A	AB	AB	AB	A	A	AB	NA	2N.R1	0	6	13	0	0	0	0	19	0	Diploid
2022-PLATE-175_2022-2183_79-Ploidy_2N_R1_079	Fam08	0 PSI	AB	AB	AB	AB	A	AB	AB	AB	AB	AB	A	AB	A	AB	AB	AB	AB	A	AB	NA	2N.R1	0	4	15	0	0	0	0	19	0	Diploid
2022-PLATE-175_2022-2183_7-Ploidy_2N_R1_007	Fam09	0 PSI	A	AB	AAB	A	AB	AB	AB	AB	AB	A	AB	AB	A	AB	AB	AB	A	A	AB	NA	2N.R1	0	6	12	1	0	0	1	19	0.0769231	Aneuploid
2022-PLATE-175_2022-2183_80-Ploidy_2N_R1_080	Fam03	0 PSI	AB	AB	NA	AB	AB	AB	A	AB	A	AB	AB	AB	AB	AB	A	AB	AB	A	A	NA	2N.R1	1	5	13	0	0	0	0	19	0	Diploid
2022-PLATE-175_2022-2183_81-Ploidy_2N_R1_081	Fam01	0 PSI	AB	A	AB	AB	A	AB	A	A	AB	AB	AB	AB	AB	AB	AB	AB	AB	A	AB	NA	2N.R1	0	5	14	0	0	0	0	19	0	Diploid
2022-PLATE-175_2022-2183_82-Ploidy_2N_R1_082	Fam03	0 PSI	AB	AB	AB	AB	A	AB	A	AB	AB	AB	A	AB	A	AB	A	AB	AB	A	AB	NA	2N.R1	0	6	13	0	0	0	0	19	0	Diploid
2022-PLATE-175_2022-2183_83-Ploidy_2N_R1_083	Fam11	0 PSI	A	AB	AB	AB	A	AB	AB	A	AB	AB	AB	AB	A	A	AB	AB	AB	A	A	NA	2N.R1	0	7	12	0	0	0	0	19	0	Diploid
2022-PLATE-175_2022-2183_84-Ploidy_2N_R1_084	Fam01	0 PSI	AB	AB	AB	AB	A	AB	A	AB	AB	A	AB	AB	AB	AB	AB	AB	AB	AB	AB	NA	2N.R1	0	3	16	0	0	0	0	19	0	Diploid
2022-PLATE-175_2022-2183_85-Ploidy_2N_R1_085	Fam06	0 PSI	AB	AB	A	AB	AB	AB	A	AB	A	AB	AB	AB	A	AB	AB	AB	AB	A	AB	NA	2N.R1	0	5	14	0	0	0	0	19	0	Diploid
2022-PLATE-175_2022-2183_87-Ploidy_2N_R1_087	Fam05	0 PSI	AB	AB	A	AB	AB	AB	A	AB	AB	AB	AB	AB	A	AB	AB	AB	AB	A	AB	NA	2N.R1	0	4	15	0	0	0	0	19	0	Diploid
2022-PLATE-175_2022-2183_88-Ploidy_2N_R1_088	Fam10	0 PSI	AB	AB	AB	AB	AB	AB	AB	AB	A	AB	A	AB	A	AB	AB	AB	AB	A	A	NA	2N.R1	0	5	14	0	0	0	0	19	0	Diploid
2022-PLATE-175_2022-2183_89-Ploidy_2N_R1_089	Fam06	0 PSI	AB	A	AB	AB	A	AB	AB	AB	A	AB	AB	A	A	AB	AB	AB	AB	A	A	NA	2N.R1	0	7	12	0	0	0	0	19	0	Diploid
2022-PLATE-175_2022-2183_8-Ploidy_2N_R1_008	Fam03	0 PSI	AB	AB	AB	AB	A	AB	AB	AB	A	AB	AB	A	AB	AB	AB	AB	A	A	AB	NA	2N.R1	0	5	14	0	0	0	0	19	0	Diploid
2022-PLATE-175_2022-2183_90-Ploidy_2N_R1_090	Fam12	0 PSI	A	A	A	AB	AB	AB	AB	AB	A	AB	AB	AB	AB	AB	AB	AB	A	A	A	NA	2N.R1	0	7	12	0	0	0	0	19	0	Diploid
2022-PLATE-175_2022-2183_91-Ploidy_2N_R1_091	Fam12	0 PSI	A	A	A	AB	A	AB	AB	AB	AB	AB	AB	AB	A	AB	A	AB	A	A	A	NA	2N.R1	0	9	10	0	0	0	0	19	0	Diploid
2022-PLATE-175_2022-2183_92-Ploidy_2N_R1_092	Fam10	0 PSI	AB	AB	AB	AB	AB	AB	AB	AB	AB	AB	AB	A	A	AB	AB	AB	A	A	A	NA	2N.R1	0	5	14	0	0	0	0	19	0	Diploid
2022-PLATE-175_2022-2183_93-Ploidy_2N_R1_093	Fam09	0 PSI	AB	A	A	A	A	AB	AB	A	AB	AB	A	AB	A	AB	AB	AB	AB	A	AB	NA	2N.R1	0	8	11	0	0	0	0	19	0	Diploid
2022-PLATE-175_2022-2183_94-Ploidy_2N_R1_094	Fam07	0 PSI	AB	AB	AB	A	A	AB	AB	AB	AB	A	AB	AB	A	AB	AB	AB	AB	A	A	NA	2N.R1	0	6	13	0	0	0	0	19	0	Diploid
2022-PLATE-176_2022-2183_100-Ploidy_2N_R1_100	Fam05	0 PSI	AB	AB	NA	AB	AB	AB	A	AB	A	AB	A	AB	A	AB	AB	AB	AB	A	A	NA	2N.R1	1	6	12	0	0	0	0	19	0	Diploid
2022-PLATE-176_2022-2183_101-Ploidy_2N_R1_101	Fam01	0 PSI	AB	AB	AB	A	A	AB	AB	A	AB	AB	A	AB	AB	AB	AB	AB	AB	AB	AB	bp shift	2N.R1	0	4	15	0	0	0	0	19	0	Diploid
2022-PLATE-176_2022-2183_102-Ploidy_2N_R1_102	Fam02	0 PSI	AB	AB	A	AB	AB	AB	AB	AB	AB	AB	AB	AB	A	AB	AB	AB	AB	A	AB	NA	2N.R1	0	3	16	0	0	0	0	19	0	Diploid
2022-PLATE-176_2022-2183_103-Ploidy_2N_R1_103	Fam11	0 PSI	A	A	A	AB	AB	AB	AB	AB	AB	AB	AB	AB	A	A	AB	AB	A	A	AB	NA	2N.R1	0	7	12	0	0	0	0	19	0	Diploid
2022-PLATE-176_2022-2183_104-Ploidy_2N_R1_104	Fam09	0 PSI	AB	AB	AB	AB	A	AB	AB	AB	AB	A	A	AB	AB	AB	AB	AB	AB	A	A	NA	2N.R1	0	5	14	0	0	0	0	19	0	Diploid
2022-PLATE-176_2022-2183_105-Ploidy_2N_R1_105	Fam02	0 PSI	AB	AB	NA	AB	AB	AB	A	A	AB	AB	AB	AB	A	AB	AB	AB	AB	AB	AB	NA	2N.R1	1	3	15	0	0	0	0	19	0	Diploid
2022-PLATE-176_2022-2183_106-Ploidy_2N_R1_106	Fam09	0 PSI	AB	A	A	AB	A	AB	AB	AB	AB	A	A	AB	A	AB	AB	AB	AB	A	A	NA	2N.R1	0	8	11	0	0	0	0	19	0	Diploid
2022-PLATE-176_2022-2183_107-Ploidy_2N_R1_107	Fam08	0 PSI	AB	AB	AB	AB	A	AB	AB	AB	AB	AB	A	AB	AB	AB	AB	AB	AB	A	AB	NA	2N.R1	0	3	16	0	0	0	0	19	0	Diploid
2022-PLATE-176_2022-2183_108-Ploidy_2N_R1_108	Fam12	0 PSI	AB	A	NA	AB	AB	AB	AB	AB	AB	AB	AB	AB	AB	AB	AB	AB	AB	AB	AB	NA	2N.R1	1	1	17	0	0	0	0	19	0	Diploid
2022-PLATE-176_2022-2183_109-Ploidy_2N_R1_109	Fam12	0 PSI	A	AB	NA	AB	A	AB	AB	AB	A	AB	AB	A	AB	AB	AB	AB	AB	A	AB	NA	2N.R1	1	5	13	0	0	0	0	19	0	Diploid
2022-PLATE-176_2022-2183_110-Ploidy_2N_R1_110	Fam08	0 PSI	AB	AB	AB	AB	AB	AB	AB	A	AB	A	AB	AB	AB	A	AB	AB	AB	A	A	NA	2N.R1	0	5	14	0	0	0	0	19	0	Diploid
2022-PLATE-176_2022-2183_111-Ploidy_2N_R1_111	Fam06	0 PSI	AB	AB	AB	AB	AB	AB	A	AB	A	A	AB	A	AB	AB	AB	AB	AB	A	AB	NA	2N.R1	0	5	14	0	0	0	0	19	0	Diploid
2022-PLATE-176_2022-2183_112-Ploidy_2N_R1_112	Fam06	0 PSI	AB	AB	A	AB	AB	AB	AB	A	AB	AB	A	AB	A	AB	AB	AB	AB	A	AB	NA	2N.R1	0	5	14	0	0	0	0	19	0	Diploid
2022-PLATE-176_2022-2183_113-Ploidy_2N_R1_113	Fam09	0 PSI	AB	AB	AB	A	AB	AB	A	AB	AB	AB	A	AB	AB	AB	AB	AB	A	A	AB	NA	2N.R1	0	5	14	0	0	0	0	19	0	Diploid
2022-PLATE-176_2022-2183_114-Ploidy_2N_R1_114	Fam04	0 PSI	AB	AB	A	AB	AB	AB	AB	AB	A	AB	AB	A	A	AB	AB	AB	AB	AB	A	NA	2N.R1	0	5	14	0	0	0	0	19	0	Diploid
2022-PLATE-176_2022-2183_115-Ploidy_2N_R1_115	Fam07	0 PSI	AB	AB	AB	AB	AB	AB	AB	A	AB	AB	AB	AB	A	AB	A	AB	A	A	AB	NA	2N.R1	0	5	14	0	0	0	0	19	0	Diploid
2022-PLATE-176_2022-2183_116-Ploidy_2N_R1_116	Fam03	0 PSI	AB	AB	AB	AB	AB	AB	A	AB	AB	AB	AB	AB	AB	AB	A	AB	AB	A	AB	NA	2N.R1	0	3	16	0	0	0	0	19	0	Diploid
2022-PLATE-176_2022-2183_117-Ploidy_2N_R1_117	Fam07	0 PSI	AB	AB	AB	AB	AB	AB	AB	AB	A	AB	A	AB	A	AB	AB	AB	AB	A	AB	NA	2N.R1	0	4	15	0	0	0	0	19	0	Diploid
2022-PLATE-176_2022-2183_118-Ploidy_2N_R1_118	Fam04	0 PSI	A	AB	NA	AB	AB	AB	AB	AB	A	AB	AB	AB	A	AB	AB	AB	AB	A	A	NA	2N.R1	1	5	13	0	0	0	0	19	0	Diploid
2022-PLATE-176_2022-2183_119-Ploidy_2N_R1_119	Fam09	0 PSI	A	A	AB	A	AB	AB	A	AB	AB	AB	AB	AB	AB	AB	AB	AB	A	A	AB	NA	2N.R1	0	6	13	0	0	0	0	19	0	Diploid
2022-PLATE-176_2022-2183_120-Ploidy_2N_R1_120	Fam05	0 PSI	A	AB	NA	AB	AB	AB	A	AB	AB	A	AB	AB	A	AB	AB	AB	AB	A	AB	NA	2N.R1	1	5	13	0	0	0	0	19	0	Diploid
2022-PLATE-176_2022-2183_121-Ploidy_2N_R1_121	Fam11	0 PSI	A	AB	AB	AB	A	AB	AB	AB	AB	AB	A	AB	AB	AB	AB	AB	A	A	AB	NA	2N.R1	0	5	14	0	0	0	0	19	0	Diploid
2022-PLATE-176_2022-2183_122-Ploidy_2N_R1_122	Fam12	0 PSI	A	A	A	AB	AB	AB	AB	AB	AB	AB	AB	AB	A	AB	AB	AB	A	AB	A	NA	2N.R1	0	6	13	0	0	0	0	19	0	Diploid
2022-PLATE-176_2022-2183_123-Ploidy_2N_R1_123	Fam11	0 PSI	AB	AB	AB	AB	AB	AB	AB	A	A	AB	A	A	AB	AB	AB	AB	A	A	AB	NA	2N.R1	0	6	13	0	0	0	0	19	0	Diploid
2022-PLATE-176_2022-2183_124-Ploidy_2N_R1_124	Fam07	0 PSI	A	AB	AB	A	AB	AB	AB	AB	AB	AB	AB	A	AB	AB	AB	AB	AB	A	A	NA	2N.R1	0	5	14	0	0	0	0	19	0	Diploid
2022-PLATE-176_2022-2183_125-Ploidy_2N_R1_125	Fam02	0 PSI	AB	AB	NA	AB	AB	AB	A	AB	AB	AB	A	AB	A	AB	AB	AB	A	A	AB	NA	2N.R1	1	5	13	0	0	0	0	19	0	Diploid
2022-PLATE-176_2022-2183_126-Ploidy_2N_R1_126	Fam06	0 PSI	A	A	NA	AB	A	AB	AB	AB	AB	AB	AB	A	AB	AB	AB	AB	AB	A	AB	NA	2N.R1	1	5	13	0	0	0	0	19	0	Diploid
2022-PLATE-176_2022-2183_127-Ploidy_2N_R1_127	Fam07	0 PSI	AB	AB	AB	A	A	AB	AB	AB	A	A	AB	AB	A	AB	AB	AB	AB	A	A	NA	2N.R1	0	7	12	0	0	0	0	19	0	Diploid
2022-PLATE-176_2022-2183_128-Ploidy_2N_R1_128	Fam04	0 PSI	AB	AB	A	AB	AB	AB	AB	AB	AB	AB	AB	AB	A	AB	AB	A	AB	AB	AB	NA	2N.R1	0	3	16	0	0	0	0	19	0	Diploid
2022-PLATE-176_2022-2183_129-Ploidy_2N_R1_129	Fam10	0 PSI	A	AB	AB	AB	AB	AB	A	A	AB	AB	AB	AB	AB	AB	AB	AB	AB	A	AB	NA	2N.R1	0	4	15	0	0	0	0	19	0	Diploid
2022-PLATE-176_2022-2183_130-Ploidy_2N_R1_130	Fam07	0 PSI	AB	AB	AB	AB	A	AB	AB	AB	AB	AB	AB	A	AB	AB	A	AB	A	A	A	NA	2N.R1	0	6	13	0	0	0	0	19	0	Diploid
2022-PLATE-176_2022-2183_131-Ploidy_2N_R1_131	Fam09	0 PSI	AB	A	AB	AB	A	AB	A	AB	AB	AB	A	AB	AB	AB	AB	AB	A	A	A	NA	2N.R1	0	7	12	0	0	0	0	19	0	Diploid
2022-PLATE-176_2022-2183_132-Ploidy_2N_R1_132	Fam04	0 PSI	AB	AB	AB	AB	AB	AB	AB	A	AB	AB	AB	AB	A	AB	AB	A	AB	AB	A	NA	2N.R1	0	4	15	0	0	0	0	19	0	Diploid
2022-PLATE-176_2022-2183_133-Ploidy_2N_R1_133	Fam02	0 PSI	A	A	A	AB	AB	AB	A	A	A	A	AB	AB	A	A	AB	A	AB	A	A	Missing maternal 6 loci	2N.R1	0	12	7	0	0	0	0	19	0	Diploid
2022-PLATE-176_2022-2183_134-Ploidy_2N_R1_134	Fam08	0 PSI	AB	AB	AB	AB	AB	AB	AB	AB	AB	AB	AB	A	AB	AB	AB	AB	A	A	AB	NA	2N.R1	0	3	16	0	0	0	0	19	0	Diploid
2022-PLATE-176_2022-2183_135-Ploidy_2N_R1_135	Fam05	0 PSI	AB	AB	A	AB	A	AB	A	AB	AB	AB	A	AB	AB	AB	AB	AB	A	A	AB	NA	2N.R1	0	6	13	0	0	0	0	19	0	Diploid
2022-PLATE-176_2022-2183_136-Ploidy_2N_R1_136	Fam10	0 PSI	AB	AB	AB	AB	AB	AB	AB	A	AB	AB	A	AB	A	AB	AB	AB	AB	A	AB	NA	2N.R1	0	4	15	0	0	0	0	19	0	Diploid
2022-PLATE-176_2022-2183_137-Ploidy_2N_R1_137	Fam02	0 PSI	AB	AB	A	AB	AB	AB	AB	A	AB	AB	AB	AB	A	A	AB	AB	AB	AB	AB	NA	2N.R1	0	4	15	0	0	0	0	19	0	Diploid
2022-PLATE-176_2022-2183_138-Ploidy_2N_R1_138	Fam12	0 PSI	AB	A	NA	AB	AB	AB	A	AB	AB	AB	AB	AB	AB	AB	AB	AB	AB	AB	AB	NA	2N.R1	1	2	16	0	0	0	0	19	0	Diploid
2022-PLATE-176_2022-2183_139-Ploidy_2N_R1_139	Fam04	0 PSI	A	A	AB	A	A	AB	AB	A	AB	AB	AB	AB	AB	AB	AB	A	AB	AB	A	NA	2N.R1	0	7	12	0	0	0	0	19	0	Diploid
2022-PLATE-176_2022-2183_140-Ploidy_2N_R1_140	Fam05	0 PSI	AB	AB	NA	AB	AB	AB	A	AB	A	AB	A	AB	AB	AB	AB	AB	AB	A	A	NA	2N.R1	1	5	13	0	0	0	0	19	0	Diploid
2022-PLATE-176_2022-2183_141-Ploidy_2N_R1_141	Fam01	0 PSI	AB	AB	AB	AB	A	AB	A	AB	AB	AB	A	AB	A	AB	A	AB	AB	A	A	NA	2N.R1	0	7	12	0	0	0	0	19	0	Diploid
2022-PLATE-176_2022-2183_142-Ploidy_2N_R1_142	Fam07	0 PSI	A	AB	AB	AB	A	AB	AB	A	AB	AB	A	AB	AB	AB	AB	AB	AB	A	A	NA	2N.R1	0	6	13	0	0	0	0	19	0	Diploid
2022-PLATE-176_2022-2183_143-Ploidy_2N_R1_143	Fam09	0 PSI	AB	A	A	A	AB	AB	AB	AB	AB	A	A	AB	A	AB	AB	AB	A	A	A	NA	2N.R1	0	9	10	0	0	0	0	19	0	Diploid
2022-PLATE-176_2022-2183_144-Ploidy_2N_R1_144	Fam04	0 PSI	A	A	NA	A	AB	AB	AB	A	AB	AB	AB	A	AB	AB	AB	A	AB	AB	AB	NA	2N.R1	1	6	12	0	0	0	0	19	0	Diploid
2022-PLATE-176_2022-2183_145-Ploidy_2N_R1_145	Fam04	0 PSI	AB	A	NA	AB	A	AB	AB	A	AB	AB	AB	AB	AB	AB	AB	AB	A	A	A	NA	2N.R1	1	6	12	0	0	0	0	19	0	Diploid
2022-PLATE-176_2022-2183_146-Ploidy_2N_R1_146	Fam12	0 PSI	AB	A	A	AB	A	AB	A	AB	AB	AB	AB	AB	AB	AB	AB	AB	AB	A	A	NA	2N.R1	0	6	13	0	0	0	0	19	0	Diploid
2022-PLATE-176_2022-2183_147-Ploidy_2N_R1_147	Fam11	0 PSI	AB	AB	A	AB	A	AB	AB	AB	A	AB	A	AB	A	A	AB	AB	AB	A	A	NA	2N.R1	0	8	11	0	0	0	0	19	0	Diploid
2022-PLATE-176_2022-2183_148-Ploidy_2N_R1_148	Fam03	0 PSI	AB	AB	AB	AB	A	AB	A	AB	AB	AB	AB	A	A	AB	AB	AB	AB	A	A	NA	2N.R1	0	6	13	0	0	0	0	19	0	Diploid
2022-PLATE-176_2022-2183_149-Ploidy_2N_R1_149	Fam07	0 PSI	AB	AB	AB	AB	A	AB	AB	A	AB	AB	AB	A	A	AB	AB	AB	AB	A	A	NA	2N.R1	0	6	13	0	0	0	0	19	0	Diploid
2022-PLATE-176_2022-2183_150-Ploidy_2N_R1_150	Fam01	0 PSI	AB	A	AB	AB	AB	AB	A	A	AB	AB	A	A	A	AB	AB	AB	AB	A	AB	NA	2N.R1	0	7	12	0	0	0	0	19	0	Diploid
2022-PLATE-176_2022-2183_151-Ploidy_2N_R1_151	Fam09	0 PSI	AB	A	A	A	A	AB	AB	AB	AB	AB	A	AB	A	AB	AB	AB	A	A	AB	NA	2N.R1	0	8	11	0	0	0	0	19	0	Diploid
2022-PLATE-176_2022-2183_152-Ploidy_2N_R1_152	Fam12	0 PSI	A	AB	A	AB	A	AB	AB	AB	AB	AB	AB	A	A	AB	AB	AB	A	AB	A	NA	2N.R1	0	7	12	0	0	0	0	19	0	Diploid
2022-PLATE-176_2022-2183_153-Ploidy_2N_R1_153	Fam12	0 PSI	AB	A	A	AB	AB	AB	AB	AB	A	AB	AB	AB	A	ABB	AB	AB	AB	AB	A	NA	2N.R1	0	5	13	0	1	0	1	19	0.0714286	Aneuploid
2022-PLATE-176_2022-2183_154-Ploidy_2N_R1_154	Fam02	0 PSI	AB	A	NA	AB	AB	AB	AB	AB	A	AB	AB	AB	AB	A	AB	AB	A	AB	AB	NA	2N.R1	1	4	14	0	0	0	0	19	0	Diploid
2022-PLATE-176_2022-2183_155-Ploidy_2N_R1_155	Fam02	0 PSI	AB	AB	NA	AB	AB	AB	AB	AB	AB	AB	AB	AB	A	A	AB	AB	AB	A	AB	NA	2N.R1	1	3	15	0	0	0	0	19	0	Diploid
2022-PLATE-176_2022-2183_156-Ploidy_2N_R1_156	Fam12	0 PSI	AB	AB	NA	AB	AB	AB	A	AB	AB	AB	AB	AB	A	AB	AB	AB	AB	AB	A	NA	2N.R1	1	3	15	0	0	0	0	19	0	Diploid
2022-PLATE-176_2022-2183_157-Ploidy_2N_R1_157	Fam04	0 PSI	AB	A	AB	AB	A	AB	AB	A	A	AB	A	AB	AB	AB	AB	AB	AB	A	AB	NA	2N.R1	0	6	13	0	0	0	0	19	0	Diploid
2022-PLATE-176_2022-2183_158-Ploidy_2N_R1_158	Fam11	0 PSI	A	A	NA	AB	AB	AB	AB	A	A	AB	A	AB	AB	A	AB	AB	AB	A	A	NA	2N.R1	1	8	10	0	0	0	0	19	0	Diploid
2022-PLATE-176_2022-2183_159-Ploidy_2N_R1_159	Fam11	0 PSI	A	A	NA	AB	AB	AB	AB	AB	A	AB	AB	AB	A	A	AB	AB	A	A	A	NA	2N.R1	1	8	10	0	0	0	0	19	0	Diploid
2022-PLATE-176_2022-2183_160-Ploidy_2N_R1_160	Fam11	0 PSI	AB	AB	AB	AB	AB	AB	AB	A	AB	AB	A	AB	A	A	AB	AB	A	A	AB	NA	2N.R1	0	6	13	0	0	0	0	19	0	Diploid
2022-PLATE-176_2022-2183_161-Ploidy_2N_R1_161	Fam07	0 PSI	AB	AB	AB	AB	A	AB	AB	AB	AB	A	A	A	A	AB	A	AB	A	A	A	NA	2N.R1	0	9	10	0	0	0	0	19	0	Diploid
2022-PLATE-176_2022-2183_162-Ploidy_2N_R1_162	Fam03	0 PSI	AB	AB	AB	AB	AB	AB	A	AB	A	AB	AB	AB	AB	AB	A	AB	AB	AB	A	NA	2N.R1	0	4	15	0	0	0	0	19	0	Diploid
2022-PLATE-176_2022-2183_163-Ploidy_2N_R1_163	Fam10	0 PSI	AB	AB	AB	AB	AB	AB	A	AB	AB	AB	AB	AB	A	AB	AB	AB	AB	AB	AB	NA	2N.R1	0	2	17	0	0	0	0	19	0	Diploid
2022-PLATE-176_2022-2183_164-Ploidy_2N_R1_164	Fam11	0 PSI	AB	A	A	AB	A	AB	AB	A	A	AB	AB	AB	A	AB	AB	AB	A	A	AB	NA	2N.R1	0	8	11	0	0	0	0	19	0	Diploid
2022-PLATE-176_2022-2183_165-Ploidy_2N_R1_165	Fam11	0 PSI	AB	AB	A	AB	AB	AB	AB	A	AB	AB	AB	A	AB	AB	AB	AB	AB	A	A	NA	2N.R1	0	5	14	0	0	0	0	19	0	Diploid
2022-PLATE-176_2022-2183_166-Ploidy_2N_R1_166	Fam10	0 PSI	AB	AB	AB	AB	A	AB	AB	AB	A	AB	AB	AB	A	A	AB	AB	A	A	AB	NA	2N.R1	0	6	13	0	0	0	0	19	0	Diploid
2022-PLATE-176_2022-2183_167-Ploidy_2N_R1_167	Fam12	0 PSI	AB	A	A	AB	AB	AB	AB	AB	A	AB	AB	AB	AB	AB	AB	AB	AB	AB	A	NA	2N.R1	0	4	15	0	0	0	0	19	0	Diploid
2022-PLATE-176_2022-2183_168-Ploidy_2N_R1_168	Fam11	0 PSI	AB	A	A	AB	AB	AB	AB	AB	A	AB	A	AB	A	A	AB	AB	AB	A	A	NA	2N.R1	0	8	11	0	0	0	0	19	0	Diploid
2022-PLATE-176_2022-2183_169-Ploidy_2N_R1_169	Fam11	0 PSI	AB	AB	NA	AB	A	AB	AB	A	AB	AB	A	AB	AB	A	AB	AB	A	A	A	NA	2N.R1	1	7	11	0	0	0	0	19	0	Diploid
2022-PLATE-176_2022-2183_170-Ploidy_2N_R1_170	Fam08	0 PSI	AB	AB	AB	AB	AB	A	AB	A	AB	A	AB	AB	AB	A	AB	AB	A	A	AB	NA	2N.R1	0	6	13	0	0	0	0	19	0	Diploid
2022-PLATE-176_2022-2183_171-Ploidy_2N_R1_171	Fam10	0 PSI	AB	AB	NA	AB	AB	AB	A	AB	AB	AB	A	AB	AB	AB	AB	AB	AB	A	A	NA	2N.R1	1	4	14	0	0	0	0	19	0	Diploid
2022-PLATE-176_2022-2183_172-Ploidy_2N_R1_172	Fam06	0 PSI	AB	AB	AB	AB	A	AB	AB	AB	AB	AB	A	AB	AB	AB	AB	AB	AB	A	A	NA	2N.R1	0	4	15	0	0	0	0	19	0	Diploid
2022-PLATE-176_2022-2183_173-Ploidy_2N_R1_173	Fam03	0 PSI	AB	AB	AB	AB	A	AB	A	AB	AB	AB	AB	AB	A	AB	AB	AB	AB	A	A	NA	2N.R1	0	5	14	0	0	0	0	19	0	Diploid
2022-PLATE-176_2022-2183_174-Ploidy_2N_R1_174	Fam05	0 PSI	A	AB	A	AB	A	AB	AB	AB	AB	A	AB	AB	A	AB	AB	AB	A	A	A	NA	2N.R1	0	8	11	0	0	0	0	19	0	Diploid
2022-PLATE-176_2022-2183_175-Ploidy_2N_R1_175	Fam12	0 PSI	A	AB	NA	AB	AB	AB	A	AB	AB	AB	AB	AB	AB	AB	AB	AB	A	AB	A	NA	2N.R1	1	4	14	0	0	0	0	19	0	Diploid
2022-PLATE-176_2022-2183_176-Ploidy_2N_R1_176	Fam08	0 PSI	A	A	AB	AB	AB	AB	AB	AB	AB	AB	A	AB	A	A	AB	AB	AB	A	AB	NA	2N.R1	0	6	13	0	0	0	0	19	0	Diploid
2022-PLATE-176_2022-2183_177-Ploidy_2N_R1_177	Fam09	0 PSI	AB	A	NA	A	A	AB	AB	AB	AB	AB	AB	AB	AB	AB	AB	AB	A	A	A	NA	2N.R1	1	6	12	0	0	0	0	19	0	Diploid
2022-PLATE-176_2022-2183_178-Ploidy_2N_R1_178	Fam03	0 PSI	AB	AB	AB	AB	A	AB	A	AB	A	AB	AB	A	AB	AB	AB	AB	A	A	AB	NA	2N.R1	0	6	13	0	0	0	0	19	0	Diploid
2022-PLATE-176_2022-2183_179-Ploidy_2N_R1_179	Fam08	0 PSI	AB	AB	AB	AB	A	A	AB	A	AB	A	A	AB	AB	AB	AB	AB	AB	A	AB	NA	2N.R1	0	6	13	0	0	0	0	19	0	Diploid
2022-PLATE-176_2022-2183_180-Ploidy_2N_R1_180	Fam08	0 PSI	AB	AB	NA	NA	NA	AB	AB	A	AB	A	AB	A	A	A	AB	AB	A	A	A	NA	2N.R1	3	8	8	0	0	0	0	19	0	Diploid
2022-PLATE-176_2022-2183_181-Ploidy_2N_R1_181	Fam05	0 PSI	AB	AB	A	AB	AB	AB	A	AB	AB	A	AB	AB	A	AB	AB	AB	AB	A	A	NA	2N.R1	0	6	13	0	0	0	0	19	0	Diploid
2022-PLATE-176_2022-2183_182-Ploidy_2N_R1_182	Fam10	0 PSI	AB	AB	AB	AB	A	AB	AB	A	AB	AB	A	AB	A	A	A	AB	AB	A	AB	NA	2N.R1	0	7	12	0	0	0	0	19	0	Diploid
2022-PLATE-176_2022-2183_183-Ploidy_2N_R1_183	Fam01	0 PSI	AB	A	AB	AB	AB	AB	AB	AB	AB	A	AB	AB	A	AB	AB	AB	AB	A	AB	NA	2N.R1	0	4	15	0	0	0	0	19	0	Diploid
2022-PLATE-176_2022-2183_184-Ploidy_2N_R1_184	Fam11	0 PSI	AB	AB	AB	AB	A	AB	AB	AB	A	AB	A	AB	AB	A	AB	AB	A	A	A	NA	2N.R1	0	7	12	0	0	0	0	19	0	Diploid
2022-PLATE-176_2022-2183_185-Ploidy_2N_R1_185	Fam02	0 PSI	AB	AB	A	AB	AB	AB	A	AB	AB	AB	AB	AB	AB	AB	AB	AB	AB	A	AB	NA	2N.R1	0	3	16	0	0	0	0	19	0	Diploid
2022-PLATE-176_2022-2183_186-Ploidy_2N_R1_186	Fam05	0 PSI	AB	AB	A	AB	AB	AB	A	AB	AB	AB	A	AB	A	AB	AB	AB	A	A	A	NA	2N.R1	0	7	12	0	0	0	0	19	0	Diploid
2022-PLATE-176_2022-2183_187-Ploidy_2N_R1_187	Fam01	0 PSI	AB	A	AB	AB	AB	AB	A	AB	AB	AB	A	A	AB	AB	AB	AB	AB	A	AB	NA	2N.R1	0	5	14	0	0	0	0	19	0	Diploid
2022-PLATE-176_2022-2183_188-Ploidy_2N_R1_188	Fam05	0 PSI	AB	AB	A	AB	AB	AB	AB	AB	A	AB	AB	AB	AB	AB	AB	AB	AB	A	A	NA	2N.R1	0	4	15	0	0	0	0	19	0	Diploid
2022-PLATE-176_2022-2183_95-Ploidy_2N_R1_095	Fam04	0 PSI	A	AB	A	AB	AB	AB	AB	AB	AB	AB	AB	AB	A	AB	AB	AB	AB	AB	AB	NA	2N.R1	0	3	16	0	0	0	0	19	0	Diploid
2022-PLATE-176_2022-2183_96-Ploidy_2N_R1_096	Fam04	0 PSI	AB	AB	A	AB	AB	AB	AB	AB	AB	AB	AB	AB	AB	AB	AB	AB	AB	A	AB	NA	2N.R1	0	2	17	0	0	0	0	19	0	Diploid
2022-PLATE-176_2022-2183_97-Ploidy_2N_R1_097	Fam02	0 PSI	AB	AB	NA	AB	A	AB	AB	A	AB	AB	A	AB	A	A	AB	AB	AB	AB	AB	NA	2N.R1	1	5	13	0	0	0	0	19	0	Diploid
2022-PLATE-176_2022-2183_99-Ploidy_2N_R1_099	Fam12	0 PSI	NA	NA	NA	AB	AB	AB	A	AB	A	AB	AB	AB	AB	AB	A	AB	A	A	AB	NA	2N.R1	3	5	11	0	0	0	0	19	0	Diploid
2022-PLATE-177_2022-2183_189-Ploidy_2N_R1_189	Fam10	0 PSI	AB	AB	A	AB	AB	AB	A	AB	AB	AB	AB	AB	A	AB	AB	AB	AB	A	AB	NA	2N.R1	0	4	15	0	0	0	0	19	0	Diploid
2022-PLATE-177_2022-2183_190-Ploidy_2N_R1_190	Fam09	0 PSI	A	AB	NA	NA	NA	AB	AB	AB	AB	AB	AB	AB	AB	AB	AB	AB	A	A	AB	NA	2N.R1	3	3	13	0	0	0	0	19	0	Diploid
2022-PLATE-177_2022-2183_191-Ploidy_2N_R1_191	Fam09	0 PSI	AB	AB	AB	A	A	AB	AB	AB	AB	AB	A	AB	AB	AB	AB	AB	AB	A	A	NA	2N.R1	0	5	14	0	0	0	0	19	0	Diploid
2022-PLATE-177_2022-2183_192-Ploidy_2N_R1_192	Fam11	0 PSI	AB	AB	NA	AB	A	AB	AB	AB	A	AB	A	AB	AB	AB	AB	AB	AB	A	AB	NA	2N.R1	1	4	14	0	0	0	0	19	0	Diploid
2022-PLATE-177_2022-2183_193-Ploidy_2N_R1_193	Fam05	0 PSI	AB	AB	A	AB	A	AB	A	AB	AB	AB	AB	AB	AB	AB	AB	AB	A	A	AB	NA	2N.R1	0	5	14	0	0	0	0	19	0	Diploid
2022-PLATE-177_2022-2183_194-Ploidy_2N_R1_194	Fam09	0 PSI	A	A	AB	AB	AB	AB	A	A	AB	AB	A	AB	A	AB	AB	AB	AB	A	A	NA	2N.R1	0	8	11	0	0	0	0	19	0	Diploid
2022-PLATE-177_2022-2183_195-Ploidy_2N_R1_195	Fam09	0 PSI	AB	AB	A	A	A	AB	A	AB	AB	AB	A	AB	AB	AB	AB	AB	AB	A	A	NA	2N.R1	0	7	12	0	0	0	0	19	0	Diploid
2022-PLATE-177_2022-2183_196-Ploidy_2N_R1_196	Fam05	0 PSI	AB	AB	A	AB	A	AB	A	AB	AB	AB	A	AB	AB	AB	AB	AB	AB	A	AB	NA	2N.R1	0	5	14	0	0	0	0	19	0	Diploid
2022-PLATE-177_2022-2183_197-Ploidy_2N_R1_197	Fam10	0 PSI	AB	AB	AB	AB	AB	AB	AB	A	AB	AB	AB	AB	AB	A	AB	AB	AB	AB	A	NA	2N.R1	0	3	16	0	0	0	0	19	0	Diploid
2022-PLATE-177_2022-2183_198-Ploidy_2N_R1_198	Fam04	0 PSI	AB	A	AB	AB	AB	AB	AB	AB	AB	AB	AB	AB	A	AB	AB	AB	AB	A	A	NA	2N.R1	0	4	15	0	0	0	0	19	0	Diploid
2022-PLATE-177_2022-2183_199-Ploidy_2N_R1_199	Fam07	0 PSI	A	AB	AB	A	AB	AB	AB	AB	A	A	A	AB	A	AB	AB	AB	AB	A	AB	NA	2N.R1	0	7	12	0	0	0	0	19	0	Diploid
2022-PLATE-177_2022-2183_200-Ploidy_2N_R1_200	Fam10	0 PSI	A	AB	A	AB	AB	AB	AB	AB	A	AB	AB	AB	A	AB	AB	AB	AB	AB	A	NA	2N.R1	0	5	14	0	0	0	0	19	0	Diploid
2022-PLATE-177_2022-2183_201-Ploidy_2N_R1_201	Fam05	0 PSI	AB	AB	NA	AB	AB	AB	AB	AB	AB	A	AB	AB	AB	AB	AB	AB	AB	A	A	NA	2N.R1	1	3	15	0	0	0	0	19	0	Diploid
2022-PLATE-177_2022-2183_202-Ploidy_2N_R1_202	Fam08	0 PSI	A	AB	AB	AB	AB	AB	AB	AB	A	AB	AB	A	AB	AB	AB	AB	A	A	AB	NA	2N.R1	0	5	14	0	0	0	0	19	0	Diploid
2022-PLATE-177_2022-2183_203-Ploidy_2N_R1_203	Fam03	0 PSI	AB	AB	AB	AB	AB	AB	AB	AB	AB	AB	AB	AB	A	AB	A	AB	AB	AB	AB	NA	2N.R1	0	2	17	0	0	0	0	19	0	Diploid
2022-PLATE-177_2022-2183_204-Ploidy_2N_R1_204	Fam11	0 PSI	AB	AB	AB	AB	A	AB	AB	A	AB	AB	A	AB	AB	AB	AB	AB	A	A	AB	NA	2N.R1	0	5	14	0	0	0	0	19	0	Diploid
2022-PLATE-177_2022-2183_205-Ploidy_2N_R1_205	Fam10	0 PSI	AB	AB	AB	AB	AB	AB	A	AB	AB	AB	AB	AB	AB	A	AB	AB	AB	AB	A	NA	2N.R1	0	3	16	0	0	0	0	19	0	Diploid
2022-PLATE-177_2022-2183_206-Ploidy_2N_R1_206	Fam08	0 PSI	AB	A	AB	AB	AB	AB	AB	A	AB	A	A	A	A	AB	AB	AB	AB	A	A	NA	2N.R1	0	8	11	0	0	0	0	19	0	Diploid
2022-PLATE-177_2022-2183_207-Ploidy_2N_R1_207	Fam07	0 PSI	A	AB	AB	AB	AB	AB	AB	AB	A	A	AB	AB	AB	AB	AB	AB	A	A	AB	NA	2N.R1	0	5	14	0	0	0	0	19	0	Diploid
2022-PLATE-177_2022-2183_208-Ploidy_2N_R1_208	Fam05	0 PSI	AB	AB	A	AB	AB	AB	A	AB	AB	A	AB	AB	A	AB	AB	AB	AB	A	A	NA	2N.R1	0	6	13	0	0	0	0	19	0	Diploid
2022-PLATE-177_2022-2183_209-Ploidy_2N_R1_209	Fam08	0 PSI	AB	AB	AB	AB	AB	A	AB	A	AB	A	A	A	AB	A	AB	AB	A	A	AB	NA	2N.R1	0	8	11	0	0	0	0	19	0	Diploid
2022-PLATE-177_2022-2183_210-Ploidy_2N_R1_210	Fam05	0 PSI	AB	AB	A	AB	A	AB	A	AB	A	AB	AB	AB	AB	AB	AB	AB	AB	A	AB	NA	2N.R1	0	5	14	0	0	0	0	19	0	Diploid
2022-PLATE-177_2022-2183_211-Ploidy_2N_R1_211	Fam11	0 PSI	A	A	A	AB	A	AB	AB	A	AB	AB	AB	AB	A	AB	AB	AB	AB	A	A	NA	2N.R1	0	8	11	0	0	0	0	19	0	Diploid
2022-PLATE-177_2022-2183_212-Ploidy_2N_R1_212	Fam04	0 PSI	AB	AB	NA	AB	A	AB	AB	A	AB	AB	AB	AB	A	AB	AB	AB	AB	AB	A	NA	2N.R1	1	4	14	0	0	0	0	19	0	Diploid
2022-PLATE-177_2022-2183_213-Ploidy_2N_R1_213	Fam05	0 PSI	AB	AB	A	AB	A	AB	AB	AB	AB	A	AB	AB	AB	AB	AB	AB	A	A	A	NA	2N.R1	0	6	13	0	0	0	0	19	0	Diploid
2022-PLATE-177_2022-2183_214-Ploidy_2N_R1_214	Fam08	0 PSI	A	AB	AB	AB	AB	AB	AB	A	AB	A	AB	AB	AB	A	AB	AB	A	A	AB	bp shift	2N.R1	0	6	13	0	0	0	0	19	0	Diploid
2022-PLATE-177_2022-2183_215-Ploidy_2N_R1_215	Fam12	0 PSI	AB	AB	A	AB	AB	AB	AB	AB	AB	AB	AB	AB	AB	AB	AB	AB	A	AB	A	NA	2N.R1	0	3	16	0	0	0	0	19	0	Diploid
2022-PLATE-177_2022-2183_216-Ploidy_2N_R1_216	Fam11	0 PSI	AB	AB	A	AB	AB	AB	AB	AB	A	AB	A	A	AB	AB	AB	AB	A	A	A	NA	2N.R1	0	7	12	0	0	0	0	19	0	Diploid
2022-PLATE-177_2022-2183_217-Ploidy_2N_R1_217	Fam09	0 PSI	AB	A	AB	A	AB	AB	AB	AB	AB	AB	A	AB	AB	AB	AB	AB	AB	A	A	NA	2N.R1	0	5	14	0	0	0	0	19	0	Diploid
2022-PLATE-177_2022-2183_218-Ploidy_2N_R1_218	Fam10	0 PSI	A	AB	NA	AB	A	AB	AB	A	AB	AB	A	AB	A	AB	AB	AB	AB	AB	A	NA	2N.R1	1	6	12	0	0	0	0	19	0	Diploid
2022-PLATE-177_2022-2183_219-Ploidy_2N_R1_219	Fam02	0 PSI	AB	AB	NA	AB	A	AB	A	AB	A	AB	AB	AB	A	A	AB	AB	AB	AB	AB	NA	2N.R1	1	5	13	0	0	0	0	19	0	Diploid
2022-PLATE-177_2022-2183_220-Ploidy_2N_R1_220	Fam02	0 PSI	NA	NA	A	AB	A	AB	AB	AB	AB	AB	A	AB	AB	AB	AB	AB	A	AB	AB	NA	2N.R1	2	4	13	0	0	0	0	19	0	Diploid
2022-PLATE-177_2022-2183_221-Ploidy_2N_R1_221	Fam11	0 PSI	AB	AB	AB	AB	AB	AB	AB	A	AB	AB	A	AB	A	AB	AB	AB	AB	A	AB	NA	2N.R1	0	4	15	0	0	0	0	19	0	Diploid
2022-PLATE-177_2022-2183_222-Ploidy_2N_R1_222	Fam03	0 PSI	AB	AB	AB	AB	A	AB	AB	AB	A	AB	AB	A	AB	AB	AB	AB	A	A	A	NA	2N.R1	0	6	13	0	0	0	0	19	0	Diploid
2022-PLATE-177_2022-2183_223-Ploidy_2N_R1_223	Fam06	0 PSI	AB	AB	NA	AB	AB	AB	A	AB	AB	AB	AB	AB	A	AB	AB	AB	AB	A	AB	NA	2N.R1	1	3	15	0	0	0	0	19	0	Diploid
2022-PLATE-177_2022-2183_224-Ploidy_2N_R1_224	Fam02	0 PSI	AB	A	A	AB	AB	AB	A	A	AB	AB	AB	AB	A	AB	AB	AB	AB	AB	A	NA	2N.R1	0	6	13	0	0	0	0	19	0	Diploid
2022-PLATE-177_2022-2183_225-Ploidy_2N_R1_225	Fam02	0 PSI	AB	A	A	AB	AB	AB	A	A	AB	AB	A	AB	AB	A	AB	AB	A	AB	AB	NA	2N.R1	0	7	12	0	0	0	0	19	0	Diploid
2022-PLATE-177_2022-2183_226-Ploidy_2N_R1_226	Fam05	0 PSI	AB	AB	NA	AB	AB	AB	AB	AB	A	AB	AB	AB	AB	AB	AB	AB	A	A	AB	NA	2N.R1	1	3	15	0	0	0	0	19	0	Diploid
2022-PLATE-177_2022-2183_227-Ploidy_2N_R1_227	Fam12	0 PSI	A	A	A	AB	AB	AB	A	AB	AB	AB	AB	AB	A	AB	A	AB	AB	A	AB	NA	2N.R1	0	7	12	0	0	0	0	19	0	Diploid
2022-PLATE-177_2022-2183_228-Ploidy_2N_R1_228	Fam01	0 PSI	AB	A	AB	AB	A	AB	A	AB	AB	A	AB	AB	AB	AB	AB	AB	AB	A	AB	NA	2N.R1	0	5	14	0	0	0	0	19	0	Diploid
2022-PLATE-177_2022-2183_229-Ploidy_2N_R1_229	Fam07	0 PSI	AB	AB	AB	AB	AB	AB	AB	A	AB	AB	AB	AB	AB	AB	AB	AB	A	A	A	NA	2N.R1	0	4	15	0	0	0	0	19	0	Diploid
2022-PLATE-177_2022-2183_230-Ploidy_2N_R1_230	Fam01	0 PSI	AB	AB	AB	AB	AB	AB	AB	AB	AB	AB	AB	AB	A	AB	AB	AB	A	A	A	NA	2N.R1	0	4	15	0	0	0	0	19	0	Diploid
2022-PLATE-177_2022-2183_231-Ploidy_2N_R1_231	Fam11	0 PSI	A	AB	AB	AB	A	AB	AB	AB	AB	AB	A	AB	AB	AB	AB	AB	A	A	A	NA	2N.R1	0	6	13	0	0	0	0	19	0	Diploid
2022-PLATE-177_2022-2183_232-Ploidy_2N_R1_232	Fam09	0 PSI	A	A	AB	AB	A	AB	AB	AB	AB	AB	AB	AB	A	AB	AB	AB	AB	A	AB	NA	2N.R1	0	5	14	0	0	0	0	19	0	Diploid
2022-PLATE-177_2022-2183_233-Ploidy_2N_R1_233	Fam11	0 PSI	A	AB	A	AB	AB	AB	AB	A	AB	AB	A	A	AB	AB	AB	AB	AB	A	AB	NA	2N.R1	0	6	13	0	0	0	0	19	0	Diploid
2022-PLATE-177_2022-2183_234-Ploidy_2N_R1_234	Fam07	0 PSI	A	AB	AB	AB	A	AB	AB	AB	AB	A	AB	AB	AB	AB	AB	AB	AB	A	A	NA	2N.R1	0	5	14	0	0	0	0	19	0	Diploid
2022-PLATE-177_2022-2183_235-Ploidy_2N_R1_235	Fam03	0 PSI	AB	AB	AB	AB	A	AB	AB	AB	AB	AB	A	A	AB	AB	AB	AB	AB	A	AB	NA	2N.R1	0	4	15	0	0	0	0	19	0	Diploid
2022-PLATE-177_2022-2183_236-Ploidy_2N_R1_236	Fam10	0 PSI	AB	AB	A	AB	AB	AB	AB	AB	A	AB	AB	A	A	A	AB	AB	AB	AB	AB	NA	2N.R1	0	5	14	0	0	0	0	19	0	Diploid
2022-PLATE-177_2022-2183_237-Ploidy_2N_R1_237	Fam06	0 PSI	A	AB	NA	AB	AB	AB	A	AB	AB	A	AB	A	A	AB	AB	AB	AB	A	A	NA	2N.R1	1	7	11	0	0	0	0	19	0	Diploid
2022-PLATE-177_2022-2183_238-Ploidy_2N_R1_238	Fam04	0 PSI	AB	AB	A	AB	A	AB	AB	AB	A	AB	AB	AB	AB	AB	AB	AB	AB	A	A	NA	2N.R1	0	5	14	0	0	0	0	19	0	Diploid
2022-PLATE-177_2022-2183_239-Ploidy_2N_R1_239	Fam08	0 PSI	AB	AB	AB	AB	A	AB	AB	AB	AB	AB	AB	AB	AB	A	AB	AB	AB	A	AB	NA	2N.R1	0	3	16	0	0	0	0	19	0	Diploid
2022-PLATE-177_2022-2183_240-Ploidy_2N_R1_240	Fam07	0 PSI	A	AB	AB	AB	A	AB	AB	AB	A	A	AB	AB	AB	AB	AB	AB	A	A	A	NA	2N.R1	0	7	12	0	0	0	0	19	0	Diploid
2022-PLATE-177_2022-2183_241-Ploidy_2N_R1_241	Fam10	0 PSI	AB	AB	AB	AB	A	AB	A	AB	AB	AB	AB	A	AB	AB	AB	AB	AB	A	A	NA	2N.R1	0	5	14	0	0	0	0	19	0	Diploid
2022-PLATE-177_2022-2183_242-Ploidy_2N_R1_242	Fam01	0 PSI	AB	A	AB	AB	AB	AB	AB	AB	AB	AB	AB	AB	AB	AB	A	AB	AB	A	AB	NA	2N.R1	0	3	16	0	0	0	0	19	0	Diploid
2022-PLATE-177_2022-2183_243-Ploidy_2N_R1_243	Fam07	0 PSI	A	AB	AB	AB	A	AB	AB	AB	A	A	AB	A	AB	AB	AB	AB	AB	A	AB	NA	2N.R1	0	6	13	0	0	0	0	19	0	Diploid
2022-PLATE-177_2022-2183_244-Ploidy_2N_R1_244	Fam06	0 PSI	A	A	AB	AB	A	AB	AB	AB	AB	A	A	A	A	AB	AB	AB	AB	A	A	NA	2N.R1	0	9	10	0	0	0	0	19	0	Diploid
2022-PLATE-177_2022-2183_245-Ploidy_2N_R1_245	Fam10	0 PSI	AB	AB	AB	AB	A	AB	AB	A	AB	AB	AB	AB	AB	AB	AB	AB	AB	AB	AB	NA	2N.R1	0	2	17	0	0	0	0	19	0	Diploid
2022-PLATE-177_2022-2183_246-Ploidy_2N_R1_246	Fam06	0 PSI	AB	AB	AB	AB	AB	AB	AB	AB	AB	A	A	A	A	AB	AB	AB	AB	A	A	NA	2N.R1	0	6	13	0	0	0	0	19	0	Diploid
2022-PLATE-177_2022-2183_247-Ploidy_2N_R1_247	Fam09	0 PSI	AB	A	A	A	AB	AB	A	AB	AB	AB	AB	AB	A	AB	AB	AB	AB	A	A	NA	2N.R1	0	7	12	0	0	0	0	19	0	Diploid
2022-PLATE-177_2022-2183_248-Ploidy_2N_R1_248	Fam09	0 PSI	AB	A	NA	AB	A	AB	AB	A	AB	AB	A	AB	A	AB	AB	AB	AB	A	AB	NA	2N.R1	1	6	12	0	0	0	0	19	0	Diploid
2022-PLATE-177_2022-2183_249-Ploidy_2N_R1_249	Fam03	0 PSI	AB	AB	AB	AB	A	AB	A	AB	A	AB	A	A	A	AB	A	AB	AB	AB	AB	NA	2N.R1	0	7	12	0	0	0	0	19	0	Diploid
2022-PLATE-177_2022-2183_250-Ploidy_2N_R1_250	Fam08	0 PSI	AB	AB	AB	AB	A	AB	AB	A	AB	A	AB	AB	A	AB	AB	AB	A	A	AB	NA	2N.R1	0	6	13	0	0	0	0	19	0	Diploid
2022-PLATE-177_2022-2183_251-Ploidy_2N_R1_251	Fam07	0 PSI	AB	AB	AB	AB	A	AB	AB	AB	A	A	AB	AB	AB	AB	AB	AB	AB	A	AB	NA	2N.R1	0	4	15	0	0	0	0	19	0	Diploid
2022-PLATE-177_2022-2183_252-Ploidy_2N_R1_252	Fam08	0 PSI	AB	AB	AB	AB	A	AB	AB	AB	AB	AB	A	AB	AB	A	AB	AB	AB	A	AB	NA	2N.R1	0	4	15	0	0	0	0	19	0	Diploid
2022-PLATE-177_2022-2183_253-Ploidy_2N_R1_253	Fam11	0 PSI	AB	A	AB	AB	A	AB	AB	AB	AB	AB	A	AB	A	AB	AB	AB	AB	A	AB	NA	2N.R1	0	5	14	0	0	0	0	19	0	Diploid
2022-PLATE-177_2022-2183_254-Ploidy_2N_R1_254	Fam07	0 PSI	A	AB	AB	A	AB	AB	AB	AB	AB	AB	AB	AB	A	AB	A	AB	A	A	A	NA	2N.R1	0	7	12	0	0	0	0	19	0	Diploid
2022-PLATE-177_2022-2183_255-Ploidy_2N_R1_255	Fam09	0 PSI	AB	AB	AB	A	AB	AB	AB	AB	AB	A	A	AB	AB	AB	AB	AB	AB	A	A	NA	2N.R1	0	5	14	0	0	0	0	19	0	Diploid
2022-PLATE-177_2022-2183_256-Ploidy_2N_R1_256	Fam12	0 PSI	AB	A	NA	AB	A	AB	A	AB	AB	AB	AB	A	AB	AB	AB	AB	AB	AB	AB	NA	2N.R1	1	4	14	0	0	0	0	19	0	Diploid
2022-PLATE-177_2022-2183_257-Ploidy_2N_R1_257	Fam03	0 PSI	AB	AB	AB	AB	A	AB	A	AB	AB	AB	AB	AB	A	AB	A	AB	AB	AB	AB	NA	2N.R1	0	4	15	0	0	0	0	19	0	Diploid
2022-PLATE-177_2022-2183_258-Ploidy_2N_R1_258	Fam08	0 PSI	A	AB	AB	AB	AB	AB	AB	AB	AB	AB	A	A	A	A	AB	AB	AB	A	AB	NA	2N.R1	0	6	13	0	0	0	0	19	0	Diploid
2022-PLATE-177_2022-2183_259-Ploidy_2N_R1_259	Fam04	0 PSI	AB	AB	AB	AB	AB	AB	AB	A	A	AB	AB	AB	A	AB	AB	AB	AB	A	AB	NA	2N.R1	0	4	15	0	0	0	0	19	0	Diploid
2022-PLATE-177_2022-2183_260-Ploidy_2N_R1_260	Fam06	0 PSI	AB	AB	NA	AB	A	AB	A	A	AB	AB	A	AB	AB	AB	AB	AB	AB	A	AB	NA	2N.R1	1	5	13	0	0	0	0	19	0	Diploid
2022-PLATE-177_2022-2183_261-Ploidy_2N_R1_261	Fam02	0 PSI	AB	A	A	AB	A	AB	AB	AB	AB	AB	AB	AB	AB	A	AB	AB	A	A	AB	NA	2N.R1	0	6	13	0	0	0	0	19	0	Diploid
2022-PLATE-177_2022-2183_262-Ploidy_2N_R1_262	Fam12	0 PSI	AB	AB	NA	AB	AB	AB	A	AB	AB	AB	AB	AB	A	AB	AB	AB	A	AB	AB	NA	2N.R1	1	3	15	0	0	0	0	19	0	Diploid
2022-PLATE-177_2022-2183_263-Ploidy_2N_R1_263	Fam05	0 PSI	AB	AB	A	AB	AB	AB	AB	AB	A	AB	AB	AB	AB	AB	AB	AB	A	A	A	NA	2N.R1	0	5	14	0	0	0	0	19	0	Diploid
2022-PLATE-177_2022-2183_264-Ploidy_2N_R1_264	Fam12	0 PSI	A	AB	A	AB	AB	AB	A	AB	AB	AB	AB	AB	AB	AB	AB	AB	A	AB	AB	NA	2N.R1	0	4	15	0	0	0	0	19	0	Diploid
2022-PLATE-177_2022-2183_265-Ploidy_2N_R1_265	Fam05	0 PSI	AB	AB	NA	AB	A	AB	A	AB	AB	AB	AB	AB	AB	AB	AB	AB	AB	A	A	NA	2N.R1	1	4	14	0	0	0	0	19	0	Diploid
2022-PLATE-177_2022-2183_266-Ploidy_2N_R1_266	Fam01	0 PSI	AB	AB	AB	AB	A	AB	A	AB	A	AB	AB	AB	AB	AB	A	AB	AB	AB	A	NA	2N.R1	0	5	14	0	0	0	0	19	0	Diploid
2022-PLATE-177_2022-2183_267-Ploidy_2N_R1_267	Fam07	0 PSI	AB	AB	AB	AB	AB	AB	AB	AB	AB	AB	AB	AB	A	AB	AB	AB	AB	A	AB	NA	2N.R1	0	2	17	0	0	0	0	19	0	Diploid
2022-PLATE-177_2022-2183_268-Ploidy_2N_R1_268	Fam12	0 PSI	AB	AB	NA	AB	AB	AB	A	AB	AB	AB	A	AB	A	AB	AB	AB	AB	A	A	NA	2N.R1	1	5	13	0	0	0	0	19	0	Diploid
2022-PLATE-177_2022-2183_269-Ploidy_2N_R1_269	Fam02	0 PSI	AB	AB	NA	AB	AB	AB	A	AB	AB	AB	AB	AB	AB	AB	AB	AB	A	AB	AB	NA	2N.R1	1	2	16	0	0	0	0	19	0	Diploid
2022-PLATE-177_2022-2183_270-Ploidy_2N_R1_270	Fam08	0 PSI	AB	AB	AB	AB	A	A	AB	AB	AB	AB	AB	AB	A	AB	AB	AB	A	A	AB	NA	2N.R1	0	5	14	0	0	0	0	19	0	Diploid
2022-PLATE-177_2022-2183_271-Ploidy_2N_R1_271	Fam09	0 PSI	A	AB	AB	A	AB	AB	AB	AB	AB	AB	A	AB	A	AB	AB	AB	A	A	AB	NA	2N.R1	0	6	13	0	0	0	0	19	0	Diploid
2022-PLATE-177_2022-2183_272-Ploidy_2N_R1_272	Fam09	0 PSI	AB	A	A	A	AB	AB	AB	AB	AB	AB	AB	AB	AB	AB	AB	AB	A	A	AB	NA	2N.R1	0	5	14	0	0	0	0	19	0	Diploid
2022-PLATE-177_2022-2183_273-Ploidy_2N_R1_273	Fam07	0 PSI	AB	AB	AB	AB	A	AB	AB	A	AB	AB	AB	AB	AB	AB	AB	AB	AB	A	A	NA	2N.R1	0	4	15	0	0	0	0	19	0	Diploid
2022-PLATE-177_2022-2183_274-Ploidy_2N_R1_274	Fam06	0 PSI	AB	AB	A	AB	A	AB	AB	A	AB	AB	A	AB	AB	AB	AB	AB	AB	A	AB	NA	2N.R1	0	5	14	0	0	0	0	19	0	Diploid
2022-PLATE-177_2022-2183_275-Ploidy_2N_R1_275	Fam11	0 PSI	A	AB	A	AB	AB	AB	AB	AB	A	AB	AB	A	A	A	AB	AB	A	A	A	NA	2N.R1	0	9	10	0	0	0	0	19	0	Diploid
2022-PLATE-177_2022-2183_276-Ploidy_2N_R1_276	Fam12	0 PSI	A	AB	NA	AB	AB	AB	A	AB	AB	AB	AB	AB	AB	AB	AB	AB	AB	A	AB	NA	2N.R1	1	3	15	0	0	0	0	19	0	Diploid
2022-PLATE-177_2022-2183_277-Ploidy_2N_R1_277	Fam04	0 PSI	AB	AB	A	AB	A	AB	AB	A	AB	AB	AB	AB	AB	AB	AB	AB	AB	AB	AB	NA	2N.R1	0	3	16	0	0	0	0	19	0	Diploid
2022-PLATE-177_2022-2183_278-Ploidy_2N_R1_278	Fam10	0 PSI	AB	AB	AB	AB	AB	AB	A	AB	AB	AB	AB	AB	AB	AB	AB	AB	AB	A	A	NA	2N.R1	0	3	16	0	0	0	0	19	0	Diploid
2022-PLATE-177_2022-2183_279-Ploidy_2N_R1_279	Fam10	0 PSI	AB	AB	AB	AB	A	AB	AB	AB	AB	AB	AB	AB	A	A	A	AB	AB	AB	AB	NA	2N.R1	0	4	15	0	0	0	0	19	0	Diploid
2022-PLATE-177_2022-2183_280-Ploidy_2N_R1_280	Fam12	0 PSI	A	A	A	AB	AB	AB	A	AB	AB	AB	AB	AB	AB	AB	AB	AB	A	A	AB	NA	2N.R1	0	6	13	0	0	0	0	19	0	Diploid
2022-PLATE-177_2022-2183_281-Ploidy_2N_R1_281	Fam08	0 PSI	A	AB	AB	AB	A	AB	AB	A	AB	A	AB	AB	A	AB	AB	AB	AB	A	A	NA	2N.R1	0	7	12	0	0	0	0	19	0	Diploid
2022-PLATE-177_2022-2183_282-Ploidy_2N_R1_282	Fam11	0 PSI	AB	AB	NA	AB	AB	AB	AB	A	A	AB	AB	A	AB	AB	AB	AB	A	A	AB	NA	2N.R1	1	5	13	0	0	0	0	19	0	Diploid
2022-PLATE-178_2022-2183_283-Ploidy_2N_R1_283	Fam06	0 PSI	A	A	AB	AB	A	NA	AB	AB	A	AB	A	A	AB	AB	AB	AB	AB	A	A	NA	2N.R1	1	8	10	0	0	0	0	19	0	Diploid
2022-PLATE-178_2022-2183_284-Ploidy_2N_R1_284	Fam07	0 PSI	AB	AB	AB	AB	A	AB	AB	AB	AB	A	A	AB	A	AB	AB	AB	AB	A	AB	NA	2N.R1	0	5	14	0	0	0	0	19	0	Diploid
2022-PLATE-178_2022-2183_285-Ploidy_2N_R1_285	Fam03	0 PSI	AB	AB	AB	AB	A	AB	AB	AB	AB	AB	AB	AB	A	AB	A	AB	AB	AB	A	NA	2N.R1	0	4	15	0	0	0	0	19	0	Diploid
2022-PLATE-178_2022-2183_286-Ploidy_2N_R1_286	Fam02	0 PSI	AB	AB	NA	AB	A	AB	AB	AB	A	AB	A	AB	A	AB	AB	AB	A	A	A	NA	2N.R1	1	7	11	0	0	0	0	19	0	Diploid
2022-PLATE-178_2022-2183_287-Ploidy_2N_R1_287	Fam11	0 PSI	AB	AB	AB	AB	AB	AB	AB	A	AB	AB	A	A	A	A	AB	AB	AB	A	AB	NA	2N.R1	0	6	13	0	0	0	0	19	0	Diploid
2022-PLATE-178_2022-2183_288-Ploidy_2N_R1_288	Fam10	0 PSI	AB	AB	AB	AB	AB	NA	A	AB	A	AB	AB	AB	AB	A	AB	AB	AB	A	A	NA	2N.R1	1	5	13	0	0	0	0	19	0	Diploid
2022-PLATE-178_2022-2183_289-Ploidy_2N_R1_289	Fam12	0 PSI	AB	A	A	AB	A	AB	A	AB	AB	AB	A	A	A	AB	AB	AB	AB	AB	A	NA	2N.R1	0	8	11	0	0	0	0	19	0	Diploid
2022-PLATE-178_2022-2183_290-Ploidy_2N_R1_290	Fam12	0 PSI	A	A	A	AB	A	NA	AB	AB	AB	AB	AB	A	AB	AB	AB	AB	A	AB	AB	NA	2N.R1	1	6	12	0	0	0	0	19	0	Diploid
2022-PLATE-178_2022-2183_291-Ploidy_2N_R1_291	Fam02	0 PSI	AB	AB	A	AB	AB	AB	AB	AB	AB	A	AB	AB	AB	AB	AB	AB	A	A	A	NA	2N.R1	0	5	14	0	0	0	0	19	0	Diploid
2022-PLATE-178_2022-2183_292-Ploidy_2N_R1_292	Fam05	0 PSI	A	AB	A	AB	AB	AB	A	AB	AB	A	A	AB	AB	AB	AB	AB	A	A	AB	NA	2N.R1	0	7	12	0	0	0	0	19	0	Diploid
2022-PLATE-178_2022-2183_293-Ploidy_2N_R1_293	Fam03	0 PSI	AB	AB	AB	AB	A	AB	A	AB	AB	AB	AB	A	AB	AB	A	AB	AB	A	AB	NA	2N.R1	0	5	14	0	0	0	0	19	0	Diploid
2022-PLATE-178_2022-2183_294-Ploidy_2N_R1_294	Fam06	0 PSI	AB	AB	AB	A	A	AB	A	AB	AB	AB	AB	AB	AB	AB	AB	AB	AB	A	A	NA	2N.R1	0	5	14	0	0	0	0	19	0	Diploid
2022-PLATE-178_2022-2183_295-Ploidy_2N_R1_295	Fam03	0 PSI	AB	AB	AB	AB	AB	AB	AB	AB	AB	AB	AB	AB	A	AB	AB	AB	A	A	A	NA	2N.R1	0	4	15	0	0	0	0	19	0	Diploid
2022-PLATE-178_2022-2183_296-Ploidy_2N_R1_296	Fam11	0 PSI	AB	AB	AB	AB	AB	AB	AB	A	A	AB	AB	AB	A	A	AB	AB	A	A	A	NA	2N.R1	0	7	12	0	0	0	0	19	0	Diploid
2022-PLATE-178_2022-2183_297-Ploidy_2N_R1_297	Fam04	0 PSI	A	A	A	AB	AB	AB	AB	AB	A	AB	A	AB	AB	AB	AB	AB	AB	A	A	NA	2N.R1	0	7	12	0	0	0	0	19	0	Diploid
2022-PLATE-178_2022-2183_298-Ploidy_2N_R1_298	Fam05	0 PSI	A	AB	A	AB	AB	AB	AB	AB	AB	A	A	AB	AB	AB	AB	AB	AB	A	AB	NA	2N.R1	0	5	14	0	0	0	0	19	0	Diploid
2022-PLATE-178_2022-2183_299-Ploidy_2N_R1_299	Fam11	0 PSI	AB	AB	A	AB	AB	AB	AB	A	A	AB	AB	AB	A	A	AB	AB	A	A	A	NA	2N.R1	0	8	11	0	0	0	0	19	0	Diploid
2022-PLATE-178_2022-2183_300-Ploidy_2N_R1_300	Fam02	0 PSI	AB	AB	A	AB	AB	AB	AB	AB	AB	AB	AB	AB	A	AB	AB	AB	A	AB	AB	NA	2N.R1	0	3	16	0	0	0	0	19	0	Diploid
2022-PLATE-178_2022-2183_301-Ploidy_2N_R1_301	Fam09	0 PSI	AB	AB	NA	AB	A	AB	A	A	AB	AB	A	AB	A	AB	AB	AB	A	A	AB	NA	2N.R1	1	7	11	0	0	0	0	19	0	Diploid
2022-PLATE-178_2022-2183_302-Ploidy_2N_R1_302	Fam10	0 PSI	A	AB	NA	AB	AB	AB	AB	A	AB	AB	A	A	AB	A	AB	AB	AB	A	AB	NA	2N.R1	1	6	12	0	0	0	0	19	0	Diploid
2022-PLATE-178_2022-2183_303-Ploidy_2N_R1_303	Fam12	0 PSI	A	A	A	AB	A	AB	AB	AB	A	AB	A	AB	A	AB	AB	AB	AB	A	A	NA	2N.R1	0	9	10	0	0	0	0	19	0	Diploid
2022-PLATE-178_2022-2183_304-Ploidy_2N_R1_304	Fam08	0 PSI	A	A	AB	AB	A	AB	AB	AB	AB	AB	A	AB	A	A	AB	AB	A	A	A	NA	2N.R1	0	9	10	0	0	0	0	19	0	Diploid
2022-PLATE-178_2022-2183_305-Ploidy_2N_R1_305	Fam10	0 PSI	AB	AB	AB	AB	A	AB	A	AB	AB	AB	A	A	AB	AB	AB	AB	AB	AB	A	NA	2N.R1	0	5	14	0	0	0	0	19	0	Diploid
2022-PLATE-178_2022-2183_306-Ploidy_2N_R1_306	Fam10	0 PSI	AB	NA	AB	AB	AB	AB	AB	AB	A	AB	AB	A	AB	AB	AB	AB	A	AB	AB	NA	2N.R1	1	3	15	0	0	0	0	19	0	Diploid
2022-PLATE-178_2022-2183_307-Ploidy_2N_R1_307	Fam08	0 PSI	AB	AB	AB	AB	A	AB	AB	AB	AB	AB	A	AB	AB	AB	AB	AB	AB	A	A	NA	2N.R1	0	4	15	0	0	0	0	19	0	Diploid
2022-PLATE-178_2022-2183_308-Ploidy_2N_R1_308	Fam10	0 PSI	A	AB	AB	AB	AB	NA	AB	A	AB	AB	AB	AB	A	AB	ABB	AB	AB	AB	A	2 paternal	2N.R1	1	4	13	0	1	0	1	19	0.0714286	Aneuploid
2022-PLATE-178_2022-2183_309-Ploidy_2N_R1_309	Fam02	0 PSI	AB	A	A	AB	AB	AB	AB	AB	AB	AB	A	AB	AB	AB	AB	AB	AB	AB	A	NA	2N.R1	0	4	15	0	0	0	0	19	0	Diploid
2022-PLATE-178_2022-2183_310-Ploidy_2N_R1_310	Fam04	0 PSI	AB	AB	AB	AB	AB	AB	AB	AB	AB	AB	AB	A	AB	AB	AB	AB	A	A	AB	NA	2N.R1	0	3	16	0	0	0	0	19	0	Diploid
2022-PLATE-178_2022-2183_311-Ploidy_2N_R1_311	Fam06	0 PSI	AB	AB	A	AB	AB	AB	AB	AB	A	NA	A	AB	AB	AB	AB	AB	AB	A	AB	NA	2N.R1	1	4	14	0	0	0	0	19	0	Diploid
2022-PLATE-178_2022-2183_312-Ploidy_2N_R1_312	Fam09	0 PSI	AB	AB	AB	A	A	AB	AB	AB	AB	A	AB	AB	AB	AB	AB	AB	A	A	A	NA	2N.R1	0	6	13	0	0	0	0	19	0	Diploid
2022-PLATE-178_2022-2183_313-Ploidy_2N_R1_313	Fam03	0 PSI	AB	AB	AB	AB	AB	AB	AB	AB	AB	AB	AB	AB	AB	AB	A	AB	AB	A	A	NA	2N.R1	0	3	16	0	0	0	0	19	0	Diploid
2022-PLATE-178_2022-2183_314-Ploidy_2N_R1_314	Fam10	0 PSI	AB	AB	AB	AB	AB	AB	AAB	AB	AB	AB	AB	AB	AB	A	AB	AB	AB	AB	AB	2 paternal	2N.R1	0	1	17	1	0	0	1	19	0.0555556	Aneuploid
2022-PLATE-178_2022-2183_315-Ploidy_2N_R1_315	Fam02	0 PSI	AB	AB	A	AB	AB	AB	AB	AB	AB	AB	A	AB	A	AB	AB	AB	A	AB	AB	NA	2N.R1	0	4	15	0	0	0	0	19	0	Diploid
2022-PLATE-178_2022-2183_316-Ploidy_2N_R1_316	Fam08	0 PSI	A	AB	AB	AB	AB	NA	AB	AB	AB	A	A	A	A	A	AB	AB	AB	A	AB	bp shift	2N.R1	1	7	11	0	0	0	0	19	0	Diploid
2022-PLATE-178_2022-2183_317-Ploidy_2N_R1_317	Fam10	0 PSI	AB	AB	A	AB	AB	AB	A	AB	AB	AB	A	AB	AB	A	AB	AB	AB	AB	A	NA	2N.R1	0	5	14	0	0	0	0	19	0	Diploid
2022-PLATE-178_2022-2183_318-Ploidy_2N_R1_318	Fam11	0 PSI	AB	AB	A	AB	AB	AB	AB	AB	A	AB	A	AB	AB	AB	AB	AB	A	A	A	NA	2N.R1	0	6	13	0	0	0	0	19	0	Diploid
2022-PLATE-178_2022-2183_319-Ploidy_2N_R1_319	Fam09	0 PSI	A	A	A	A	A	AB	AB	AB	AB	AB	A	AB	A	AB	AB	AB	A	A	A	NA	2N.R1	0	10	9	0	0	0	0	19	0	Diploid
2022-PLATE-178_2022-2183_320-Ploidy_2N_R1_320	Fam02	0 PSI	AB	AB	NA	AB	A	AB	A	AB	A	AB	AB	AB	A	AB	AB	AB	A	AB	AB	NA	2N.R1	1	5	13	0	0	0	0	19	0	Diploid
2022-PLATE-178_2022-2183_321-Ploidy_2N_R1_321	Fam03	0 PSI	AB	AB	AB	AB	A	AB	A	AB	AB	AB	AB	A	A	AB	AB	AB	AB	A	AB	NA	2N.R1	0	5	14	0	0	0	0	19	0	Diploid
2022-PLATE-178_2022-2183_322-Ploidy_2N_R1_322	Fam05	0 PSI	AB	AB	A	AB	AB	NA	A	AB	A	AB	AB	AB	A	AB	AB	AB	AB	A	AB	NA	2N.R1	1	5	13	0	0	0	0	19	0	Diploid
2022-PLATE-178_2022-2183_323-Ploidy_2N_R1_323	Fam05	0 PSI	AB	AB	A	AB	A	AB	AB	AB	AB	AB	AB	AB	AB	AB	AB	AB	AB	A	A	NA	2N.R1	0	4	15	0	0	0	0	19	0	Diploid
2022-PLATE-178_2022-2183_324-Ploidy_2N_R1_324	Fam06	0 PSI	AB	AB	AB	AB	AB	AB	AB	AB	AB	A	AB	AB	A	AB	AB	AB	AB	A	AB	NA	2N.R1	0	3	16	0	0	0	0	19	0	Diploid
2022-PLATE-178_2022-2183_325-Ploidy_2N_R1_325	Fam06	0 PSI	AB	AB	A	AB	A	AB	A	A	AB	AB	AB	A	A	AB	AB	AB	AB	A	AB	NA	2N.R1	0	7	12	0	0	0	0	19	0	Diploid
2022-PLATE-178_2022-2183_326-Ploidy_2N_R1_326	Fam12	0 PSI	AB	AB	A	AB	A	AB	A	AB	AB	AB	AB	AB	AB	AB	AB	AB	AB	AB	AB	NA	2N.R1	0	3	16	0	0	0	0	19	0	Diploid
2022-PLATE-178_2022-2183_327-Ploidy_2N_R1_327	Fam07	0 PSI	AB	AB	AB	AB	A	NA	AB	A	AB	AB	AB	AB	A	AB	AB	AB	AB	A	A	NA	2N.R1	1	5	13	0	0	0	0	19	0	Diploid
2022-PLATE-178_2022-2183_328-Ploidy_2N_R1_328	Fam08	0 PSI	A	A	AB	AB	AB	A	AB	AB	AB	AB	AB	AB	AB	AB	AB	AB	A	A	A	NA	2N.R1	0	6	13	0	0	0	0	19	0	Diploid
2022-PLATE-178_2022-2183_329-Ploidy_2N_R1_329	Fam06	0 PSI	AB	AB	NA	AB	AB	AB	A	AB	A	A	AB	A	AB	AB	AB	AB	AB	A	AB	NA	2N.R1	1	5	13	0	0	0	0	19	0	Diploid
2022-PLATE-178_2022-2183_330-Ploidy_2N_R1_330	Fam01	0 PSI	AB	AB	AB	AB	AB	AB	A	AB	AB	AB	A	AB	A	AB	AB	AB	AB	AB	AB	NA	2N.R1	0	3	16	0	0	0	0	19	0	Diploid
2022-PLATE-178_2022-2183_331-Ploidy_2N_R1_331	Fam09	0 PSI	AB	AB	A	A	A	AB	A	AB	AB	AB	A	AB	A	AB	AB	AB	A	A	A	NA	2N.R1	0	9	10	0	0	0	0	19	0	Diploid
2022-PLATE-178_2022-2183_332-Ploidy_2N_R1_332	Fam12	0 PSI	A	AB	A	AB	A	NA	A	AB	A	AB	AB	A	AB	AB	AB	AB	AB	A	A	NA	2N.R1	1	8	10	0	0	0	0	19	0	Diploid
2022-PLATE-178_2022-2183_333-Ploidy_2N_R1_333	Fam07	0 PSI	A	AB	AB	AB	A	NA	AB	AB	AB	AB	AB	AB	AB	AB	AB	AB	AB	A	AB	NA	2N.R1	1	3	15	0	0	0	0	19	0	Diploid
2022-PLATE-178_2022-2183_334-Ploidy_2N_R1_334	Fam01	0 PSI	AB	A	AB	AB	AB	AB	AB	AB	AB	AB	AB	AB	AB	AB	AB	AB	AB	A	AB	NA	2N.R1	0	2	17	0	0	0	0	19	0	Diploid
2022-PLATE-178_2022-2183_335-Ploidy_2N_R1_335	Fam09	0 PSI	AB	A	AB	AB	A	AB	A	AB	AB	AB	A	AB	A	AB	AB	AB	A	A	AB	NA	2N.R1	0	7	12	0	0	0	0	19	0	Diploid
2022-PLATE-178_2022-2183_336-Ploidy_2N_R1_336	Fam09	0 PSI	AB	A	AB	A	AB	AB	AB	AB	AB	AB	A	AB	A	AB	AB	AB	AB	A	AB	NA	2N.R1	0	5	14	0	0	0	0	19	0	Diploid
2022-PLATE-178_2022-2183_337-Ploidy_2N_R1_337	Fam11	0 PSI	AB	A	AB	AB	AB	AB	AB	A	AB	AB	A	A	A	A	AB	AB	A	A	AB	NA	2N.R1	0	8	11	0	0	0	0	19	0	Diploid
2022-PLATE-178_2022-2183_338-Ploidy_2N_R1_338	Fam04	0 PSI	A	AB	NA	AB	A	AB	AB	AB	A	AB	A	AB	AB	AB	AB	A	A	AB	AB	NA	2N.R1	1	6	12	0	0	0	0	19	0	Diploid
2022-PLATE-178_2022-2183_339-Ploidy_2N_R1_339	Fam01	0 PSI	AB	AB	AB	AB	AB	NA	AB	AB	AB	AB	AB	A	A	AB	AB	AB	AB	A	A	NA	2N.R1	1	4	14	0	0	0	0	19	0	Diploid
2022-PLATE-178_2022-2183_340-Ploidy_2N_R1_340	Fam10	0 PSI	AB	AB	A	AB	A	AB	AB	AB	AB	AB	AB	AB	A	A	AB	AB	AB	A	A	NA	2N.R1	0	6	13	0	0	0	0	19	0	Diploid
2022-PLATE-178_2022-2183_341-Ploidy_2N_R1_341	Fam03	0 PSI	AB	AB	AB	AB	A	AB	AB	AB	AB	AB	AB	AB	AB	AB	A	AB	AB	AB	A	NA	2N.R1	0	3	16	0	0	0	0	19	0	Diploid
2022-PLATE-178_2022-2183_342-Ploidy_2N_R1_342	Fam05	0 PSI	A	AB	A	AB	A	AB	A	AB	A	AB	AB	AB	A	AB	AB	AB	AB	A	A	NA	2N.R1	0	8	11	0	0	0	0	19	0	Diploid
2022-PLATE-178_2022-2183_343-Ploidy_2N_R1_343	Fam12	0 PSI	AB	A	A	AB	A	AB	AB	AB	A	AB	AB	AB	AB	AB	AB	AB	A	A	A	NA	2N.R1	0	7	12	0	0	0	0	19	0	Diploid
2022-PLATE-178_2022-2183_344-Ploidy_2N_R1_344	Fam01	0 PSI	AB	AB	AB	A	AB	AB	AB	A	AB	AB	A	A	A	AB	A	AB	AB	AB	AB	NA	2N.R1	0	6	13	0	0	0	0	19	0	Diploid
2022-PLATE-178_2022-2183_345-Ploidy_2N_R1_345	Fam02	0 PSI	AB	AB	NA	AB	A	AB	AB	AB	AB	AB	A	A	A	AB	AB	AB	A	AB	A	NA	2N.R1	1	6	12	0	0	0	0	19	0	Diploid
2022-PLATE-178_2022-2183_346-Ploidy_2N_R1_346	Fam06	0 PSI	A	AB	AB	AB	AB	AB	AB	AB	AB	AB	A	A	AB	AB	AB	AB	AB	A	AB	NA	2N.R1	0	4	15	0	0	0	0	19	0	Diploid
2022-PLATE-178_2022-2183_347-Ploidy_2N_R1_347	Fam08	0 PSI	A	AB	AB	AB	A	AB	AB	AB	AB	AB	A	AB	AB	A	AB	AB	AB	A	A	NA	2N.R1	0	6	13	0	0	0	0	19	0	Diploid
2022-PLATE-178_2022-2183_348-Ploidy_2N_R1_348	Fam05	0 PSI	AB	AB	A	AB	A	AB	AB	AB	AB	AB	A	AB	A	AB	AB	AB	AB	A	A	NA	2N.R1	0	6	13	0	0	0	0	19	0	Diploid
2022-PLATE-178_2022-2183_349-Ploidy_2N_R1_349	Fam05	0 PSI	AB	AB	A	AB	A	AB	AB	AB	NA	AB	A	NA	A	AB	NA	NA	AB	NA	AB	NA	2N.R1	5	4	10	0	0	0	0	19	0	Diploid
2022-PLATE-178_2022-2183_350-Ploidy_2N_R1_350	Fam04	0 PSI	AB	AB	AB	A	A	AB	AB	A	AB	AB	AB	AB	A	AB	AB	AB	A	AB	AB	NA	2N.R1	0	5	14	0	0	0	0	19	0	Diploid
2022-PLATE-178_2022-2183_351-Ploidy_2N_R1_351	Fam04	0 PSI	AB	AB	AB	AB	AB	AB	NA	AB	AB	AB	AB	AB	AB	AB	AB	AB	A	AB	A	NA	2N.R1	1	2	16	0	0	0	0	19	0	Diploid
2022-PLATE-178_2022-2183_352-Ploidy_2N_R1_352	Fam02	0 PSI	AB	AB	A	AB	A	AB	A	AB	AB	AB	AB	A	A	A	AB	AB	AB	A	AB	NA	2N.R1	0	7	12	0	0	0	0	19	0	Diploid
2022-PLATE-178_2022-2183_353-Ploidy_2N_R1_353	Fam02	0 PSI	AB	A	NA	AB	AB	AB	AB	AB	AB	AB	AB	AB	AB	A	AB	AB	AB	A	AB	NA	2N.R1	1	3	15	0	0	0	0	19	0	Diploid
2022-PLATE-178_2022-2183_354-Ploidy_2N_R1_354	Fam07	0 PSI	A	AB	AB	A	A	AB	AB	A	AB	AB	AB	AB	A	AB	AB	AB	AB	A	A	NA	2N.R1	0	7	12	0	0	0	0	19	0	Diploid
2022-PLATE-178_2022-2183_355-Ploidy_2N_R1_355	Fam01	0 PSI	AB	AB	AB	AB	AB	AB	A	AB	A	AB	A	AB	AB	AB	AB	AB	A	A	AB	NA	2N.R1	0	5	14	0	0	0	0	19	0	Diploid
2022-PLATE-178_2022-2183_356-Ploidy_2N_R1_356	Fam05	0 PSI	AB	AB	NA	AB	AB	AB	AB	AB	AB	AB	A	AB	AB	AB	AB	AB	A	A	AB	NA	2N.R1	1	3	15	0	0	0	0	19	0	Diploid
2022-PLATE-178_2022-2183_357-Ploidy_2N_R1_357	Fam07	0 PSI	A	AB	AB	A	AB	AB	AB	A	AB	AB	AB	A	A	AB	AB	AB	A	A	A	NA	2N.R1	0	8	11	0	0	0	0	19	0	Diploid
2022-PLATE-178_2022-2183_358-Ploidy_2N_R1_358	Fam06	0 PSI	AB	AB	A	AB	AB	AB	A	AB	AB	A	A	AB	AB	AB	AB	AB	AB	A	AB	NA	2N.R1	0	5	14	0	0	0	0	19	0	Diploid
2022-PLATE-178_2022-2183_359-Ploidy_2N_R1_359	Fam06	0 PSI	AB	AB	AB	AB	A	NA	A	AB	AB	A	A	A	A	AB	AB	AB	AB	A	A	NA	2N.R1	1	8	10	0	0	0	0	19	0	Diploid
2022-PLATE-178_2022-2183_360-Ploidy_2N_R1_360	Fam09	0 PSI	AB	A	NA	A	A	AB	AB	AB	AB	A	AB	AB	AB	AB	AB	AB	A	A	AB	NA	2N.R1	1	6	12	0	0	0	0	19	0	Diploid
2022-PLATE-178_2022-2183_361-Ploidy_2N_R1_361	Fam12	0 PSI	A	A	NA	AB	A	AB	AB	AB	A	AB	AB	AB	AB	AB	AB	AB	AB	A	AB	NA	2N.R1	1	5	13	0	0	0	0	19	0	Diploid
2022-PLATE-178_2022-2183_362-Ploidy_2N_R1_362	Fam04	0 PSI	AB	AB	AB	A	AB	AB	AB	AB	AB	AB	AB	A	AB	AB	AB	A	AB	AB	A	NA	2N.R1	0	4	15	0	0	0	0	19	0	Diploid
2022-PLATE-178_2022-2183_363-Ploidy_2N_R1_363	Fam06	0 PSI	AB	AB	NA	A	AB	AB	NA	AB	A	AB	A	AB	AB	AB	AB	AB	AB	A	AB	NA	2N.R1	2	4	13	0	0	0	0	19	0	Diploid
2022-PLATE-178_2022-2183_364-Ploidy_2N_R1_364	Fam08	0 PSI	A	AB	AB	AB	AB	A	AB	AB	AB	AB	A	A	AB	AB	AB	AB	AB	A	AB	NA	2N.R1	0	5	14	0	0	0	0	19	0	Diploid
2022-PLATE-178_2022-2183_365-Ploidy_2N_R1_365	Fam07	0 PSI	AB	AB	AB	A	AB	AB	AB	A	AB	AB	AB	AB	A	AB	A	AB	A	A	AB	NA	2N.R1	0	6	13	0	0	0	0	19	0	Diploid
2022-PLATE-178_2022-2183_366-Ploidy_2N_R1_366	Fam11	0 PSI	AB	A	AB	AB	AB	AB	AB	AB	A	AB	A	A	A	AB	AB	AB	AB	A	AB	NA	2N.R1	0	6	13	0	0	0	0	19	0	Diploid
2022-PLATE-178_2022-2183_367-Ploidy_2N_R1_367	Fam09	0 PSI	AB	AB	AB	AB	A	AB	AB	AB	AB	AB	A	AB	A	AB	AB	AB	AB	A	A	NA	2N.R1	0	5	14	0	0	0	0	19	0	Diploid
2022-PLATE-178_2022-2183_368-Ploidy_2N_R1_368	Fam08	0 PSI	AB	AB	AB	AB	A	AB	AB	A	A	AB	A	AB	AB	AB	AB	AB	AB	A	AB	NA	2N.R1	0	5	14	0	0	0	0	19	0	Diploid
2022-PLATE-178_2022-2183_369-Ploidy_2N_R1_369	Fam12	0 PSI	A	A	A	AB	AB	AB	A	AB	AB	AB	AB	AB	AB	AB	AB	AB	AB	A	A	NA	2N.R1	0	6	13	0	0	0	0	19	0	Diploid
2022-PLATE-178_2022-2183_370-Ploidy_2N_R1_370	Fam10	0 PSI	A	AB	NA	AB	AB	AB	A	AB	A	AB	AB	A	A	AB	AB	AB	AB	AB	A	NA	2N.R1	1	6	12	0	0	0	0	19	0	Diploid
2022-PLATE-178_2022-2183_371-Ploidy_2N_R1_371	Fam03	0 PSI	AB	AB	AB	AB	AB	AB	A	AB	AB	AB	AB	AB	A	AB	AB	AB	A	AB	A	NA	2N.R1	0	4	15	0	0	0	0	19	0	Diploid
2022-PLATE-178_2022-2183_372-Ploidy_2N_R1_372	Fam08	0 PSI	AB	AB	AB	AB	A	A	AB	A	AB	A	AB	AB	AB	AB	AB	AB	A	A	A	NA	2N.R1	0	7	12	0	0	0	0	19	0	Diploid
2022-PLATE-178_2022-2183_373-Ploidy_2N_R1_373	Fam01	0 PSI	AB	A	AB	AB	AB	AB	A	AB	AB	AB	AB	A	AB	AB	A	AB	AB	AB	A	NA	2N.R1	0	5	14	0	0	0	0	19	0	Diploid
2022-PLATE-178_2022-2183_374-Ploidy_2N_R1_374	Fam12	0 PSI	AB	A	A	AB	A	AB	AB	AB	A	AB	AB	AB	AB	AB	A	AB	A	AB	AB	NA	2N.R1	0	6	13	0	0	0	0	19	0	Diploid
2022-PLATE-178_2022-2183_375-Ploidy_2N_R1_375	Fam12	0 PSI	AB	AB	A	AB	A	AB	A	AB	A	AB	AB	AB	AB	AB	AB	AB	A	A	AB	NA	2N.R1	0	6	13	0	0	0	0	19	0	Diploid
2022-PLATE-178_2022-2183_376-Ploidy_2N_R1_376	Fam08	0 PSI	AB	AB	AB	AB	A	A	AB	AB	AB	A	AB	AB	AB	AB	AB	AB	A	A	AB	NA	2N.R1	0	5	14	0	0	0	0	19	0	Diploid
2022-PLATE-186_2022-2183_377-Ploidy_2N_R1_377	Fam04	0 PSI	AB	AB	AB	AB	A	NA	AB	AB	AB	AB	AB	AB	A	AB	AB	AB	A	AB	AB	NA	2N.R1	1	3	15	0	0	0	0	19	0	Diploid
2022-PLATE-186_2022-2183_378-Ploidy_2N_R1_378	Fam07	0 PSI	AB	AB	AB	AB	AB	AB	AB	AB	A	A	AB	A	AB	AB	AB	AB	AB	A	A	NA	2N.R1	0	5	14	0	0	0	0	19	0	Diploid
2022-PLATE-186_2022-2183_379-Ploidy_2N_R1_379	Fam08	0 PSI	A	A	AB	AB	AB	AB	AB	AB	A	AB	A	A	AB	AB	AB	AB	A	A	A	NA	2N.R1	0	8	11	0	0	0	0	19	0	Diploid
2022-PLATE-186_2022-2183_380-Ploidy_2N_R1_380	Fam04	0 PSI	NA	NA	AB	AB	A	AB	AB	AB	AB	AB	AB	AB	A	AB	AB	AB	AB	A	AB	NA	2N.R1	2	3	14	0	0	0	0	19	0	Diploid
2022-PLATE-186_2022-2183_381-Ploidy_2N_R1_381	Fam07	0 PSI	NA	NA	AB	A	A	AB	AB	A	AB	AB	AB	AB	AB	AB	AB	AB	AB	A	A	bp shift	2N.R1	2	5	12	0	0	0	0	19	0	Diploid
2022-PLATE-186_2022-2183_382-Ploidy_2N_R1_382	Fam02	0 PSI	AB	AB	A	AB	AB	AB	A	AB	AB	AB	AB	AB	A	AB	AB	AB	A	A	A	NA	2N.R1	0	6	13	0	0	0	0	19	0	Diploid
2022-PLATE-186_2022-2183_383-Ploidy_2N_R1_383	Fam09	0 PSI	AB	A	AB	A	A	AB	AB	AB	AB	AB	AB	AB	A	AB	AB	AB	AB	A	A	NA	2N.R1	0	6	13	0	0	0	0	19	0	Diploid
2022-PLATE-186_2022-2183_384-Ploidy_2N_R1_384	Fam05	0 PSI	AB	AB	A	AB	A	AB	A	AB	AB	AB	AB	AB	A	AB	AB	AB	A	A	AB	NA	2N.R1	0	6	13	0	0	0	0	19	0	Diploid
2022-PLATE-186_2022-2183_385-Ploidy_2N_R1_385	Fam09	0 PSI	A	A	AB	A	A	NA	AB	AB	AB	AB	AB	AB	A	AB	AB	AB	AB	A	A	NA	2N.R1	1	7	11	0	0	0	0	19	0	Diploid
2022-PLATE-186_2022-2183_386-Ploidy_2N_R1_386	Fam03	0 PSI	AB	AB	AB	AB	A	AB	A	AB	AB	AB	AB	A	AB	AB	AB	AB	AB	AB	AB	NA	2N.R1	0	3	16	0	0	0	0	19	0	Diploid
2022-PLATE-186_2022-2183_387-Ploidy_2N_R1_387	Fam07	0 PSI	AB	AB	AB	A	AB	AB	AB	AB	A	AB	AB	A	A	AB	AB	AB	A	A	AB	NA	2N.R1	0	6	13	0	0	0	0	19	0	Diploid
2022-PLATE-186_2022-2183_388-Ploidy_2N_R1_388	Fam04	0 PSI	AB	AB	A	A	AB	AB	AB	AB	A	AB	AB	AB	A	AB	AB	AB	AB	A	AB	NA	2N.R1	0	5	14	0	0	0	0	19	0	Diploid
2022-PLATE-186_2022-2183_389-Ploidy_2N_R1_389	Fam01	0 PSI	AB	AB	AB	AB	A	AB	AB	AB	AB	AB	A	AB	AB	AB	AB	AB	AB	AB	AB	NA	2N.R1	0	2	17	0	0	0	0	19	0	Diploid
2022-PLATE-186_2022-2183_390-Ploidy_2N_R1_390	Fam03	0 PSI	AB	AB	AB	AB	A	AB	AB	AB	AB	AB	AB	AB	A	AB	AB	AB	AB	AB	A	NA	2N.R1	0	3	16	0	0	0	0	19	0	Diploid
2022-PLATE-186_2022-2183_391-Ploidy_2N_R1_391	Fam10	0 PSI	AB	AB	AB	AB	A	AB	AB	A	AB	AB	AB	AB	AB	A	AB	AB	AB	AB	AB	NA	2N.R1	0	3	16	0	0	0	0	19	0	Diploid
2022-PLATE-186_2022-2183_392-Ploidy_2N_R1_392	Fam04	0 PSI	AB	AB	NA	AB	A	AB	AB	AB	AB	AB	AB	AB	A	AB	AB	AB	AB	A	A	NA	2N.R1	1	4	14	0	0	0	0	19	0	Diploid
2022-PLATE-186_2022-2183_393-Ploidy_2N_R1_393	Fam03	0 PSI	AB	AB	AB	AB	AB	AB	AB	AB	AB	AB	AB	AB	AB	AB	A	AB	AB	AB	A	NA	2N.R1	0	2	17	0	0	0	0	19	0	Diploid
2022-PLATE-186_2022-2183_394-Ploidy_2N_R1_394	Fam09	0 PSI	AB	AB	AB	AB	AB	AB	A	A	AB	AB	AB	AB	A	AB	AB	AB	A	A	A	NA	2N.R1	0	6	13	0	0	0	0	19	0	Diploid
2022-PLATE-186_2022-2183_395-Ploidy_2N_R1_395	Fam05	0 PSI	A	AB	A	AB	AB	AB	AB	AB	A	AB	AB	AB	AB	AB	AB	AB	AB	A	AB	NA	2N.R1	0	4	15	0	0	0	0	19	0	Diploid
2022-PLATE-186_2022-2183_396-Ploidy_2N_R1_396	Fam04	0 PSI	A	AB	A	AB	AB	AB	AB	A	AB	AB	A	AB	A	AB	AB	AB	AB	AB	AB	NA	2N.R1	0	5	14	0	0	0	0	19	0	Diploid
2022-PLATE-186_2022-2183_397-Ploidy_2N_R1_397	Fam05	0 PSI	AB	AB	A	AB	A	AB	AB	AB	AB	AB	AB	AB	A	AB	AB	AB	AB	A	AB	NA	2N.R1	0	4	15	0	0	0	0	19	0	Diploid
2022-PLATE-186_2022-2183_398-Ploidy_2N_R1_398	Fam03	0 PSI	AB	AB	AB	AB	A	AB	A	AB	A	AB	AB	AB	A	AB	AB	AB	A	AB	A	NA	2N.R1	0	6	13	0	0	0	0	19	0	Diploid
2022-PLATE-186_2022-2183_399-Ploidy_2N_R1_399	Fam03	0 PSI	AB	AB	AB	AB	A	AB	A	AB	AB	AB	AB	AB	A	AB	AB	AB	A	AB	AB	NA	2N.R1	0	4	15	0	0	0	0	19	0	Diploid
2022-PLATE-186_2022-2183_400-Ploidy_2N_R1_400	Fam02	0 PSI	AB	AB	A	AB	AB	AB	AB	AB	AB	A	AB	AB	A	AB	AB	AB	A	A	A	NA	2N.R1	0	6	13	0	0	0	0	19	0	Diploid
2022-PLATE-186_2022-2183_401-Ploidy_2N_R1_401	Fam01	0 PSI	AB	AB	AB	A	AB	AB	A	AB	AB	AB	A	A	AB	AB	AB	AB	A	AB	A	NA	2N.R1	0	6	13	0	0	0	0	19	0	Diploid
2022-PLATE-186_2022-2183_402-Ploidy_2N_R1_402	Fam02	0 PSI	AB	AB	A	AB	AB	AB	A	AB	A	AB	AB	AB	A	A	AB	AB	A	AB	AB	NA	2N.R1	0	6	13	0	0	0	0	19	0	Diploid
2022-PLATE-186_2022-2183_403-Ploidy_2N_R1_403	Fam05	0 PSI	AB	AB	A	AB	A	AB	A	AB	AB	AB	A	AB	AB	AB	AB	AB	AB	A	AB	NA	2N.R1	0	5	14	0	0	0	0	19	0	Diploid
2022-PLATE-186_2022-2183_404-Ploidy_2N_R1_404	Fam04	0 PSI	AB	A	AB	AB	A	AB	AB	A	A	AB	A	AB	AB	AB	AB	AB	AB	A	A	NA	2N.R1	0	7	12	0	0	0	0	19	0	Diploid
2022-PLATE-186_2022-2183_405-Ploidy_2N_R1_405	Fam03	0 PSI	AB	AB	AB	AB	A	AB	AB	AB	AB	AB	AB	AB	AB	AB	A	AB	AB	A	A	NA	2N.R1	0	4	15	0	0	0	0	19	0	Diploid
2022-PLATE-186_2022-2183_406-Ploidy_2N_R1_406	Fam01	0 PSI	AB	AB	AB	AB	A	AB	A	AB	A	A	A	AB	A	AB	A	AB	AB	A	A	NA	2N.R1	0	9	10	0	0	0	0	19	0	Diploid
2022-PLATE-186_2022-2183_407-Ploidy_2N_R1_407	Fam06	0 PSI	A	AB	AB	AB	AB	AB	AB	AB	AB	AB	AB	A	AB	AB	AB	AB	AB	A	AB	NA	2N.R1	0	3	16	0	0	0	0	19	0	Diploid
2022-PLATE-186_2022-2183_408-Ploidy_2N_R1_408	Fam08	0 PSI	AB	A	AB	AB	A	AB	AB	AB	AB	AB	A	AB	A	AB	AB	AB	AB	A	AB	NA	2N.R1	0	5	14	0	0	0	0	19	0	Diploid
2022-PLATE-186_2022-2183_409-Ploidy_2N_R1_409	Fam06	0 PSI	AB	AB	AB	AB	AB	AB	A	AB	A	A	AB	A	AB	AB	AB	AB	AB	A	AB	bp shift	2N.R1	0	5	14	0	0	0	0	19	0	Diploid
2022-PLATE-186_2022-2183_410-Ploidy_2N_R1_410	Fam10	0 PSI	AB	AB	AB	AB	AB	AB	AB	AB	AB	AB	AB	AB	AB	A	A	AB	AB	A	AB	NA	2N.R1	0	3	16	0	0	0	0	19	0	Diploid
2022-PLATE-186_2022-2183_411-Ploidy_2N_R1_411	Fam04	0 PSI	A	AB	A	AB	A	AB	AB	AB	A	AB	AB	AB	A	AB	AB	AB	AB	AB	AB	NA	2N.R1	0	5	14	0	0	0	0	19	0	Diploid
2022-PLATE-186_2022-2183_412-Ploidy_2N_R1_412	Fam07	0 PSI	AB	AB	AB	A	AB	AB	AB	AB	AB	A	AB	A	AB	AB	A	AB	A	A	A	NA	2N.R1	0	7	12	0	0	0	0	19	0	Diploid
2022-PLATE-186_2022-2183_413-Ploidy_2N_R1_413	Fam12	0 PSI	A	AB	A	AB	AB	AB	A	AB	AB	AB	AB	AB	A	AB	AB	AB	A	AB	AB	NA	2N.R1	0	5	14	0	0	0	0	19	0	Diploid
2022-PLATE-186_2022-2183_414-Ploidy_2N_R1_414	Fam09	0 PSI	AB	A	AB	AB	AB	AB	A	AB	AB	A	AB	AB	A	AB	AB	AB	AB	A	A	NA	2N.R1	0	6	13	0	0	0	0	19	0	Diploid
2022-PLATE-186_2022-2183_415-Ploidy_2N_R1_415	Fam06	0 PSI	AB	A	AB	AB	A	AB	A	AB	AB	A	A	A	AB	AB	AB	AB	AB	A	AB	NA	2N.R1	0	7	12	0	0	0	0	19	0	Diploid
2022-PLATE-186_2022-2183_416-Ploidy_2N_R1_416	Fam08	0 PSI	A	AB	AB	AB	A	AB	AB	AB	AB	AB	A	AB	AB	A	AB	AB	A	A	A	NA	2N.R1	0	7	12	0	0	0	0	19	0	Diploid
2022-PLATE-186_2022-2183_417-Ploidy_2N_R1_417	Fam09	0 PSI	A	A	A	A	A	AB	AB	AB	AB	AB	AB	AB	AB	AB	AB	AB	A	A	A	NA	2N.R1	0	8	11	0	0	0	0	19	0	Diploid
2022-PLATE-186_2022-2183_418-Ploidy_2N_R1_418	Fam03	0 PSI	AB	AB	AB	AB	A	AB	AB	AB	A	AB	A	AB	A	AB	A	AB	AB	AB	AB	NA	2N.R1	0	5	14	0	0	0	0	19	0	Diploid
2022-PLATE-186_2022-2183_419-Ploidy_2N_R1_419	Fam12	0 PSI	AB	A	A	AB	AB	AB	AB	AB	A	AB	AB	AB	AB	AB	AB	AB	AB	A	AB	NA	2N.R1	0	4	15	0	0	0	0	19	0	Diploid
2022-PLATE-186_2022-2183_420-Ploidy_2N_R1_420	Fam04	0 PSI	A	AB	AB	AB	A	AB	AB	AB	A	AB	AB	AB	AB	AB	AB	AB	A	A	A	NA	2N.R1	0	6	13	0	0	0	0	19	0	Diploid
2022-PLATE-186_2022-2183_421-Ploidy_2N_R1_421	Fam06	0 PSI	AB	AB	A	AB	A	AB	A	AB	AB	A	A	AB	AB	AB	AB	AB	AB	A	AB	NA	2N.R1	0	6	13	0	0	0	0	19	0	Diploid
2022-PLATE-186_2022-2183_422-Ploidy_2N_R1_422	Fam12	0 PSI	AB	A	A	AB	AB	AB	A	AB	AB	AB	A	AB	A	AB	A	AB	A	A	AB	NA	2N.R1	0	8	11	0	0	0	0	19	0	Diploid
2022-PLATE-186_2022-2183_423-Ploidy_2N_R1_423	Fam01	0 PSI	AB	A	AB	AB	AB	AB	A	AB	AB	AB	AB	A	AB	AB	A	AB	AB	AB	AB	NA	2N.R1	0	4	15	0	0	0	0	19	0	Diploid
2022-PLATE-186_2022-2183_424-Ploidy_2N_R1_424	Fam03	0 PSI	AB	AB	AB	AB	A	AB	AB	AB	A	AB	AB	AB	AB	AB	A	AB	AB	A	A	NA	2N.R1	0	5	14	0	0	0	0	19	0	Diploid
2022-PLATE-186_2022-2183_425-Ploidy_2N_R1_425	Fam02	0 PSI	AB	AB	A	AB	A	AB	A	A	A	AB	AB	A	A	A	AB	AB	AB	AB	AB	NA	2N.R1	0	8	11	0	0	0	0	19	0	Diploid
2022-PLATE-186_2022-2183_426-Ploidy_2N_R1_426	Fam05	0 PSI	A	AB	A	AB	A	AB	A	AB	AB	AB	AB	AB	A	AB	AB	AB	AB	A	A	NA	2N.R1	0	7	12	0	0	0	0	19	0	Diploid
2022-PLATE-186_2022-2183_427-Ploidy_2N_R1_427	Fam04	0 PSI	AB	AB	AB	AB	AB	AB	AB	A	AB	AB	A	A	A	AB	AB	AB	AB	A	A	NA	2N.R1	0	6	13	0	0	0	0	19	0	Diploid
2022-PLATE-186_2022-2183_428-Ploidy_2N_R1_428	Fam12	0 PSI	AB	AB	A	AB	AB	AB	A	AB	AB	AB	AB	AB	A	AB	AB	AB	AB	AB	A	bp shift	2N.R1	0	4	15	0	0	0	0	19	0	Diploid
2022-PLATE-186_2022-2183_429-Ploidy_2N_R1_429	Fam10	0 PSI	AB	AB	AB	AB	A	AB	AB	A	AB	AB	AB	A	AB	A	AB	AB	AB	AB	A	NA	2N.R1	0	5	14	0	0	0	0	19	0	Diploid
2022-PLATE-186_2022-2183_430-Ploidy_2N_R1_430	Fam02	0 PSI	AB	AB	A	AB	A	AB	A	AB	A	A	A	AB	AB	A	AB	AB	A	AB	A	NA	2N.R1	0	9	10	0	0	0	0	19	0	Diploid
2022-PLATE-186_2022-2183_431-Ploidy_2N_R1_431	Fam01	0 PSI	AB	A	AB	AB	A	AB	A	AB	AB	AB	A	AB	AB	AB	AB	AB	AB	AB	A	NA	2N.R1	0	5	14	0	0	0	0	19	0	Diploid
2022-PLATE-186_2022-2183_432-Ploidy_2N_R1_432	Fam04	0 PSI	AB	AB	AB	AB	A	AB	AB	AB	AB	AB	A	AB	AB	AB	AB	AB	A	A	AB	NA	2N.R1	0	4	15	0	0	0	0	19	0	Diploid
2022-PLATE-186_2022-2183_433-Ploidy_2N_R1_433	Fam06	0 PSI	AB	A	A	AB	AB	AB	A	AB	AB	AB	AB	A	A	AB	AB	AB	AB	A	A	NA	2N.R1	0	7	12	0	0	0	0	19	0	Diploid
2022-PLATE-186_2022-2183_434-Ploidy_2N_R1_434	Fam11	0 PSI	A	AB	A	AB	A	AB	AB	A	AB	AB	A	AB	AB	A	AB	AB	AB	A	A	NA	2N.R1	0	8	11	0	0	0	0	19	0	Diploid
2022-PLATE-186_2022-2183_435-Ploidy_2N_R1_435	Fam05	0 PSI	AB	AB	A	AB	A	AB	A	AB	A	AB	A	AB	A	AB	AB	AB	AB	A	AB	NA	2N.R1	0	7	12	0	0	0	0	19	0	Diploid
2022-PLATE-186_2022-2183_436-Ploidy_2N_R1_436	Fam11	0 PSI	A	AB	A	AB	AB	AB	AB	A	A	AB	AB	AB	AB	A	AB	AB	A	A	A	NA	2N.R1	0	8	11	0	0	0	0	19	0	Diploid
2022-PLATE-186_2022-2183_437-Ploidy_2N_R1_437	Fam12	0 PSI	AB	AB	A	AB	A	AB	AB	AB	AB	AB	A	AB	A	AB	AB	AB	A	A	A	NA	2N.R1	0	7	12	0	0	0	0	19	0	Diploid
2022-PLATE-186_2022-2183_438-Ploidy_2N_R1_438	Fam01	0 PSI	AB	AB	AB	AB	AB	AB	AB	A	AB	AB	AB	AB	A	AB	AB	AB	AB	AB	A	NA	2N.R1	0	3	16	0	0	0	0	19	0	Diploid
2022-PLATE-186_2022-2183_439-Ploidy_2N_R1_439	Fam02	0 PSI	AB	AB	A	AB	A	AB	AB	AB	A	AB	A	A	A	A	AB	AB	AB	AB	AB	NA	2N.R1	0	7	12	0	0	0	0	19	0	Diploid
[truncated: 1,743 more rows]
